# Supplementary material for: BRAFV600E induces reversible mitotic arrest in human melanocytes via microRNA-mediated suppression of AURKB
Source: bioRxiv preprint, doi:10.1101/2020.05.21.109397, version 3 (2021-09-19)
Supplement: Table S1 [file 109397_file03.xlsx]

## Sheet: mRNA
	logFC	AveExpr	t	P.Value	adj.P.Val	B
ENSG00000000971.11	-2.30398	9.19722	-12.9569	1.96876e-12	3.39178e-08	18.527
ENSG00000018236.10	-2.37329	7.09853	-11.2417	3.89469e-11	3.27506e-07	15.5438
ENSG00000164687.6	3.61927	5.99048	10.8395	8.21365e-11	3.27506e-07	14.8493
ENSG00000211445.7	-2.56289	7.20702	-10.7619	9.50506e-11	3.27506e-07	14.6456
ENSG00000109610.5	-2.23994	4.61569	-10.2973	2.31353e-10	5.75791e-07	13.8476
ENSG00000122707.7	-1.46957	5.70845	-10.2916	2.33953e-10	5.75791e-07	13.7747
ENSG00000137070.13	-1.57751	5.22883	-10.0325	3.88661e-10	8.36982e-07	13.2938
ENSG00000135931.13	1.24753	4.93373	9.79092	6.28528e-10	9.91141e-07	12.8198
ENSG00000143801.12	1.30991	4.72312	9.7639	6.63546e-10	9.91141e-07	12.7847
ENSG00000161326.8	1.44471	4.2172	9.72725	7.14285e-10	9.91141e-07	12.7375
ENSG00000114698.10	-1.40022	5.2079	-9.70883	7.41283e-10	9.91141e-07	12.6438
ENSG00000196218.7	-1.36094	4.70774	-9.63972	8.52323e-10	9.91141e-07	12.5344
ENSG00000154309.7	-1.5836	6.21197	-9.65921	8.19385e-10	9.91141e-07	12.4948
ENSG00000196963.2	-2.02708	4.42647	-9.59852	9.26546e-10	9.91141e-07	12.4803
ENSG00000106462.6	1.51704	4.8118	9.58445	9.5341e-10	9.91141e-07	12.4223
ENSG00000123374.6	1.81267	5.69055	9.55142	1.01962e-09	9.91141e-07	12.3048
ENSG00000187231.9	-0.991168	5.60811	-9.54381	1.03555e-09	9.91141e-07	12.2776
ENSG00000150627.11	-2.73968	4.01135	-9.41988	1.3341e-09	1.09447e-06	12.1296
ENSG00000100504.12	-2.34321	7.89287	-9.47718	1.18636e-09	1.07571e-06	12.0914
ENSG00000079308.12	-1.542	8.85617	-9.42921	1.30882e-09	1.09447e-06	11.9863
ENSG00000071967.7	-1.29869	6.77071	-9.36769	1.48517e-09	1.16302e-06	11.875
ENSG00000188293.5	7.05238	-1.38761	10.9284	6.95281e-11	3.27506e-07	11.8511
ENSG00000144935.10	-1.4681	4.84571	-9.30735	1.68205e-09	1.20743e-06	11.85
ENSG00000159899.10	-0.845094	5.4695	-9.32774	1.61266e-09	1.20743e-06	11.8403
ENSG00000103489.7	-1.88943	7.13641	-9.25901	1.85902e-09	1.28109e-06	11.6451
ENSG00000150907.6	-0.696167	6.41766	-9.14679	2.34777e-09	1.55567e-06	11.4176
ENSG00000081985.6	3.66973	3.90519	9.04969	2.87708e-09	1.70918e-06	11.3628
ENSG00000141338.9	-3.36896	7.12889	-9.11422	2.51315e-09	1.60358e-06	11.3617
ENSG00000136295.10	1.22446	5.99455	9.07076	2.75265e-09	1.69366e-06	11.2768
ENSG00000078295.11	3.11883	4.5683	8.99009	3.26145e-09	1.87294e-06	11.2491
ENSG00000153902.9	-2.49136	5.03539	-8.91638	3.81102e-09	2.11794e-06	11.0459
ENSG00000079337.11	-1.77933	4.60332	-8.88661	4.05922e-09	2.18538e-06	11.0008
ENSG00000157193.10	1.85674	3.80602	8.7754	5.14343e-09	2.56119e-06	10.8117
ENSG00000008441.12	-1.14693	7.3627	-8.82687	4.60869e-09	2.40602e-06	10.7209
ENSG00000175287.14	-1.60487	3.00742	-8.73267	5.63562e-09	2.56119e-06	10.708
ENSG00000127564.12	2.4556	2.36944	8.73177	5.64655e-09	2.56119e-06	10.5808
ENSG00000124406.12	-2.34998	6.47066	-8.74415	5.49886e-09	2.56119e-06	10.5771
ENSG00000197766.3	-2.96457	5.63539	-8.70377	5.99575e-09	2.64858e-06	10.5633
ENSG00000029153.10	2.64719	3.94628	8.56709	8.04888e-09	3.30157e-06	10.3748
ENSG00000162599.11	-1.10201	6.93057	-8.63773	6.91044e-09	2.90373e-06	10.3185
ENSG00000145794.12	-4.208	4.30948	-8.47453	9.83895e-09	3.85478e-06	10.1812
ENSG00000107282.5	-1.93167	3.75424	-8.44634	1.04619e-08	4.00529e-06	10.1168
ENSG00000006634.3	1.21729	4.43264	8.47425	9.84503e-09	3.85478e-06	10.116
ENSG00000121552.3	4.94231	4.71459	8.37005	1.23594e-08	4.32577e-06	9.95905
ENSG00000164683.12	1.97765	3.25262	8.34945	1.293e-08	4.32577e-06	9.91302
ENSG00000168079.12	-3.12281	4.88732	-8.35564	1.27558e-08	4.32577e-06	9.88501
ENSG00000099622.9	-1.00779	7.73066	-8.42405	1.09831e-08	4.0593e-06	9.83982
ENSG00000161091.8	1.94748	7.80595	8.42027	1.10742e-08	4.0593e-06	9.83401
ENSG00000163913.7	-1.13486	5.98147	-8.35921	1.26564e-08	4.32577e-06	9.73955
ENSG00000148180.12	-1.28845	9.50242	-8.34501	1.30567e-08	4.32577e-06	9.66243
ENSG00000101938.10	-3.14123	3.79645	-8.22783	1.68976e-08	4.87549e-06	9.65493
ENSG00000121413.8	-1.4711	4.32644	-8.25494	1.59164e-08	4.85043e-06	9.65358
ENSG00000149582.11	-1.30482	4.34598	-8.25121	1.6048e-08	4.85043e-06	9.63896
ENSG00000127863.11	2.31774	4.86596	8.1909	1.83356e-08	5.17844e-06	9.49262
ENSG00000117394.15	2.28761	6.60086	8.23797	1.65235e-08	4.87549e-06	9.4606
ENSG00000004776.7	-2.57802	1.36247	-8.28044	1.50468e-08	4.71321e-06	9.43558
ENSG00000099953.5	2.50425	3.27651	8.12259	2.13352e-08	5.71985e-06	9.42681
ENSG00000090006.13	-1.36902	7.6475	-8.22564	1.69799e-08	4.87549e-06	9.40123
ENSG00000120992.13	1.25195	5.31304	8.18046	1.87642e-08	5.21402e-06	9.39198
ENSG00000135476.7	2.04934	3.59059	8.08958	2.2961e-08	5.90406e-06	9.35385
ENSG00000169783.8	1.79692	4.25398	8.07068	2.39486e-08	5.9795e-06	9.264
ENSG00000143631.10	7.88189	8.63389	8.11744	2.15806e-08	5.71985e-06	9.24129
ENSG00000077942.13	-2.32071	7.92836	-8.14501	2.02985e-08	5.55085e-06	9.22303
ENSG00000066279.12	2.792	5.42778	8.05727	2.46757e-08	5.9875e-06	9.15896
ENSG00000095713.9	-3.02968	7.53246	-8.10765	2.2056e-08	5.75729e-06	9.15124
ENSG00000073060.11	1.29416	6.31402	8.08288	2.33063e-08	5.90473e-06	9.11022
ENSG00000183833.12	-2.23694	2.00407	-8.02814	2.63347e-08	6.215e-06	9.09497
ENSG00000162687.12	-2.90744	4.72112	-7.97856	2.94253e-08	6.49923e-06	9.05514
ENSG00000102098.13	-1.64882	1.98139	-7.99669	2.8254e-08	6.36432e-06	9.05162
ENSG00000139629.11	2.15902	3.34685	7.92009	3.35546e-08	7.22598e-06	8.98838
ENSG00000157625.11	0.729706	6.34156	8.02876	2.62977e-08	6.215e-06	8.98263
ENSG00000152284.4	-1.00646	5.68103	-7.99368	2.84451e-08	6.36432e-06	8.94071
ENSG00000118515.7	2.12087	6.8228	8.00594	2.76754e-08	6.36432e-06	8.9312
ENSG00000136695.10	7.27686	-0.64027	8.66793	6.47558e-09	2.78903e-06	8.89837
ENSG00000138756.13	0.676682	7.3945	7.99545	2.83325e-08	6.36432e-06	8.88403
ENSG00000160803.7	0.605994	6.9075	7.94812	3.15057e-08	6.87063e-06	8.78425
ENSG00000189129.9	-2.76751	3.06081	-7.81253	4.27733e-08	8.47009e-06	8.74724
ENSG00000269741.1	5.6799	-1.64662	8.73154	5.64925e-09	2.56119e-06	8.7432
ENSG00000258818.2	-1.39266	3.19554	-7.77771	4.6285e-08	8.76261e-06	8.67517
ENSG00000138738.6	-1.50172	4.29852	-7.79182	4.48277e-08	8.6102e-06	8.62689
ENSG00000058091.12	-1.25598	4.47973	-7.7951	4.44955e-08	8.6102e-06	8.61
ENSG00000113648.12	0.916348	7.67534	7.87385	3.72385e-08	7.78543e-06	8.6061
ENSG00000151623.10	-1.52105	5.69322	-7.82768	4.13312e-08	8.27969e-06	8.57415
ENSG00000123200.12	1.34768	9.21656	7.8579	3.86028e-08	7.82411e-06	8.56652
ENSG00000177694.10	-1.16886	4.74568	-7.79032	4.49801e-08	8.6102e-06	8.56519
ENSG00000189056.9	-3.35855	4.89919	-7.72774	5.18484e-08	9.50259e-06	8.48926
ENSG00000177839.4	-2.00521	2.92321	-7.65423	6.13087e-08	1.03486e-05	8.40251
ENSG00000009335.13	0.507047	7.62496	7.77083	4.70124e-08	8.80359e-06	8.37013
ENSG00000168703.5	7.94005	-0.348652	8.30136	1.437e-08	4.58456e-06	8.36248
ENSG00000105993.10	0.708268	6.92748	7.74661	4.96715e-08	9.20151e-06	8.32412
ENSG00000170271.6	-1.41762	5.43026	-7.70755	5.42869e-08	9.64181e-06	8.31685
ENSG00000198826.6	1.98568	4.39095	7.65024	6.18706e-08	1.03486e-05	8.3149
ENSG00000147027.3	-2.85314	2.74655	-7.60397	6.87817e-08	1.08713e-05	8.2742
ENSG00000165949.8	2.42973	5.43492	7.66993	5.91494e-08	1.02932e-05	8.26357
ENSG00000007402.7	-1.90431	1.50183	-7.64524	6.25813e-08	1.03668e-05	8.21945
ENSG00000091986.11	-1.60346	9.05782	-7.67501	5.84685e-08	1.02785e-05	8.14724
ENSG00000150764.9	-1.25469	5.1654	-7.61387	6.7239e-08	1.07259e-05	8.11922
ENSG00000106976.14	-1.38724	6.46877	-7.64009	6.33229e-08	1.03898e-05	8.09682
ENSG00000198734.6	-3.68288	7.09266	-7.62779	6.513e-08	1.05855e-05	8.08047
ENSG00000092295.7	3.31367	4.3835	7.5152	8.43405e-08	1.22133e-05	8.05686
ENSG00000020181.13	-1.19298	7.17914	-7.62293	6.58582e-08	1.06038e-05	8.037
ENSG00000130675.10	4.72799	-1.69321	8.31953	1.38073e-08	4.48817e-06	8.03344
ENSG00000132164.5	4.4673	1.07704	7.71644	5.31999e-08	9.54717e-06	8.01289
ENSG00000139618.10	1.52296	5.55479	7.57817	7.29728e-08	1.14289e-05	8.01217
ENSG00000108932.7	3.3907	3.20942	7.47895	9.16909e-08	1.2948e-05	8.01137
ENSG00000137103.12	-1.18183	4.02451	-7.50055	8.72342e-08	1.24501e-05	7.99062
ENSG00000182575.7	-2.47338	0.648721	-7.65854	6.07082e-08	1.03486e-05	7.9636
ENSG00000139433.5	2.13176	5.50442	7.53184	8.11693e-08	1.22133e-05	7.92555
ENSG00000116194.8	-2.85219	3.29011	-7.43598	1.01262e-07	1.36292e-05	7.91922
ENSG00000128602.5	-1.01869	5.01006	-7.52272	8.2892e-08	1.22133e-05	7.91811
ENSG00000100234.11	-1.78663	6.47549	-7.55686	7.66325e-08	1.17877e-05	7.90959
ENSG00000178342.4	-3.67558	-0.870957	-8.06088	2.44778e-08	5.9875e-06	7.86337
ENSG00000100505.9	-2.86093	6.23109	-7.51509	8.43616e-08	1.22133e-05	7.84836
ENSG00000198853.7	-1.0576	6.13584	-7.52087	8.32448e-08	1.22133e-05	7.83181
ENSG00000147862.10	-1.24063	7.21389	-7.52221	8.29884e-08	1.22133e-05	7.80384
ENSG00000136108.10	1.64607	5.10333	7.4667	9.4321e-08	1.32111e-05	7.80153
ENSG00000120324.4	-1.77317	3.39907	-7.38456	1.14074e-07	1.4345e-05	7.78939
ENSG00000121900.14	1.81834	4.02089	7.39482	1.11391e-07	1.42152e-05	7.76455
ENSG00000173376.9	-3.3011	2.92666	-7.36651	1.18953e-07	1.47433e-05	7.75642
ENSG00000127824.9	2.33985	5.72811	7.45604	9.66714e-08	1.34104e-05	7.73848
ENSG00000163815.5	-2.53266	4.61113	-7.39731	1.1075e-07	1.42152e-05	7.73446
ENSG00000128849.9	-1.91157	5.91796	-7.45312	9.73276e-08	1.34104e-05	7.70279
ENSG00000159363.13	0.853711	5.77622	7.44979	9.80796e-08	1.34104e-05	7.684
ENSG00000141682.11	2.92684	1.17457	7.43103	1.02429e-07	1.36794e-05	7.67762
ENSG00000183856.6	2.36238	3.43993	7.32401	1.31309e-07	1.56013e-05	7.66128
ENSG00000104549.7	1.59923	5.27075	7.41461	1.06396e-07	1.38863e-05	7.65741
ENSG00000102383.9	-1.87636	1.10736	-7.41662	1.05903e-07	1.38863e-05	7.64127
ENSG00000178922.12	-1.06403	4.48504	-7.37366	1.16996e-07	1.46059e-05	7.63525
ENSG00000204851.5	-2.34637	2.66488	-7.30078	1.38611e-07	1.60267e-05	7.60909
ENSG00000171208.5	2.00803	2.77195	7.29681	1.39898e-07	1.60678e-05	7.60631
ENSG00000179294.5	1.76526	0.970032	7.40376	1.09105e-07	1.41327e-05	7.59138
ENSG00000164530.9	-2.94165	5.40517	-7.35966	1.20863e-07	1.47726e-05	7.57686
ENSG00000184886.3	1.05789	4.60652	7.34803	1.24173e-07	1.49598e-05	7.56197
ENSG00000007516.9	-2.59218	2.82127	-7.27671	1.46613e-07	1.61913e-05	7.55939
ENSG00000162073.9	1.60075	3.93267	7.30095	1.38555e-07	1.60267e-05	7.55212
ENSG00000167656.4	5.45688	3.1488	7.28043	1.45347e-07	1.61551e-05	7.53257
ENSG00000128655.12	3.91031	-0.469772	7.7228	5.24352e-08	9.50899e-06	7.51606
ENSG00000173085.9	0.942224	3.53705	7.27289	1.47928e-07	1.62325e-05	7.51041
ENSG00000197256.6	-1.39253	6.45079	-7.38709	1.13406e-07	1.4345e-05	7.50909
ENSG00000140525.13	1.14609	5.44437	7.35862	1.21153e-07	1.47726e-05	7.50055
ENSG00000149050.5	-1.66289	2.45563	-7.25186	1.55375e-07	1.6771e-05	7.49775
ENSG00000134765.5	6.1346	5.33314	7.25247	1.55155e-07	1.6771e-05	7.47393
ENSG00000109255.7	5.56227	-1.27516	7.90739	3.45274e-08	7.34367e-06	7.46865
ENSG00000154263.13	-2.71829	6.45272	-7.35647	1.21762e-07	1.47726e-05	7.46834
ENSG00000060558.3	1.98174	3.48636	7.23991	1.59779e-07	1.68876e-05	7.45568
ENSG00000121316.6	1.80874	5.15098	7.30939	1.35858e-07	1.59222e-05	7.43109
ENSG00000166173.9	-1.3531	3.57871	-7.23298	1.62388e-07	1.69553e-05	7.42187
ENSG00000119711.8	-0.816433	5.13365	-7.31532	1.33994e-07	1.58113e-05	7.42181
ENSG00000105048.12	5.0172	-1.18453	7.86534	3.79601e-08	7.78543e-06	7.3971
ENSG00000197991.10	-3.32188	2.00518	-7.2421	1.58961e-07	1.68876e-05	7.39608
ENSG00000154358.15	-2.03102	8.15864	-7.33551	1.2784e-07	1.52946e-05	7.36084
ENSG00000115361.3	-4.85174	0.941885	-7.41511	1.06274e-07	1.38863e-05	7.35528
ENSG00000137812.15	2.3882	4.45564	7.22627	1.64961e-07	1.71202e-05	7.35072
ENSG00000172350.5	3.97614	-0.255373	7.56761	7.47634e-08	1.16038e-05	7.33662
ENSG00000103257.4	1.72193	5.85416	7.28404	1.44127e-07	1.61551e-05	7.30955
ENSG00000165272.10	3.31965	5.83449	7.25081	1.55756e-07	1.6771e-05	7.29282
ENSG00000151748.10	-0.681681	6.01264	-7.28498	1.43811e-07	1.61551e-05	7.28394
ENSG00000186310.9	-1.79433	2.73862	-7.14818	1.98118e-07	1.99601e-05	7.27163
ENSG00000050344.8	1.62798	5.11624	7.24145	1.59206e-07	1.68876e-05	7.26684
ENSG00000256673.1	2.92012	-0.419517	7.49952	8.74429e-08	1.24501e-05	7.26027
ENSG00000161249.16	2.97716	7.35405	7.2833	1.44379e-07	1.61551e-05	7.25942
ENSG00000164733.16	1.83907	8.59523	7.28214	1.44767e-07	1.61551e-05	7.23234
ENSG00000213022.4	6.60978	-0.386318	7.65509	6.11888e-08	1.03486e-05	7.22165
ENSG00000151322.14	-2.16285	2.62122	-7.10789	2.17817e-07	2.12009e-05	7.17885
ENSG00000154642.6	1.31082	4.51081	7.1723	1.87205e-07	1.91974e-05	7.17532
ENSG00000137393.8	1.46745	4.26649	7.14211	2.00967e-07	2.01294e-05	7.13886
ENSG00000135838.9	1.70141	5.63931	7.20083	1.75088e-07	1.80624e-05	7.13006
ENSG00000026025.9	-1.10257	10.9264	-7.23382	1.62069e-07	1.69553e-05	7.12214
ENSG00000166451.9	1.12988	3.75367	7.10316	2.20261e-07	2.13183e-05	7.09405
ENSG00000080618.9	3.98313	-2.31162	7.86657	3.78548e-08	7.78543e-06	7.08921
ENSG00000099864.13	-1.53586	4.20123	-7.11387	2.14775e-07	2.10235e-05	7.07928
ENSG00000115423.14	-1.86937	3.46338	-7.06573	2.40589e-07	2.2584e-05	7.05696
ENSG00000137563.7	1.85655	3.94726	7.08228	2.31375e-07	2.20228e-05	7.04641
ENSG00000075702.12	2.00156	3.10529	7.03803	2.56864e-07	2.34129e-05	7.01587
ENSG00000143556.4	8.10191	3.86511	7.06865	2.38937e-07	2.2584e-05	7.0083
ENSG00000114999.7	1.12379	4.93671	7.11839	2.125e-07	2.10114e-05	6.98471
ENSG00000071205.7	-0.702214	6.08619	-7.15673	1.94175e-07	1.97944e-05	6.97704
ENSG00000166473.12	-1.75514	4.71723	-7.08827	2.28126e-07	2.18539e-05	6.97355
ENSG00000138795.5	1.48325	6.4774	7.15176	1.9646e-07	1.99095e-05	6.95739
ENSG00000177556.7	0.793976	4.09989	7.05269	2.48114e-07	2.28583e-05	6.92597
ENSG00000204248.6	-3.73451	5.3291	-7.06007	2.43825e-07	2.2584e-05	6.91665
ENSG00000269113.3	-2.10411	1.06978	-7.06314	2.42062e-07	2.2584e-05	6.90306
ENSG00000092853.9	2.57561	3.04947	6.98058	2.94291e-07	2.49756e-05	6.88988
ENSG00000172375.8	0.827006	4.56774	7.06167	2.42908e-07	2.2584e-05	6.88725
ENSG00000136546.9	-3.96867	3.96215	-6.9846	2.91501e-07	2.48613e-05	6.88657
ENSG00000143515.12	-1.1257	7.46924	-7.1266	2.08434e-07	2.07567e-05	6.86935
ENSG00000184347.10	-1.79193	7.53365	-7.11653	2.13431e-07	2.10114e-05	6.84803
ENSG00000124813.16	1.03775	4.09226	7.00742	2.76159e-07	2.43983e-05	6.83578
ENSG00000040608.9	2.22027	1.14365	7.00926	2.74957e-07	2.43983e-05	6.82566
ENSG00000158813.13	-2.24195	1.33806	-7.00473	2.77923e-07	2.44288e-05	6.81058
ENSG00000122034.8	0.686949	6.18558	7.08789	2.28331e-07	2.18539e-05	6.80794
ENSG00000135451.8	2.19282	2.75126	6.93883	3.24957e-07	2.62834e-05	6.79536
ENSG00000123473.11	1.52998	4.32072	6.99633	2.83512e-07	2.47936e-05	6.7926
ENSG00000155918.3	4.80918	-1.45948	7.53046	8.14278e-08	1.22133e-05	6.77196
ENSG00000143520.6	7.55652	7.25214	6.98723	2.89693e-07	2.483e-05	6.75171
ENSG00000108639.3	1.37445	5.30619	7.02389	2.65599e-07	2.39568e-05	6.72845
ENSG00000132970.8	-1.30217	4.4287	-6.97467	2.98445e-07	2.50974e-05	6.71716
ENSG00000171793.9	1.27646	4.83463	6.99074	2.87288e-07	2.483e-05	6.7013
ENSG00000176909.7	-1.35006	1.76738	-6.90524	3.51992e-07	2.74893e-05	6.68507
ENSG00000087274.12	-0.4671	7.79009	-7.04768	2.51067e-07	2.30074e-05	6.67731
ENSG00000144857.10	-1.35476	6.64763	-7.03582	2.5821e-07	2.34129e-05	6.67178
ENSG00000167768.4	6.77848	7.45573	6.9744	2.9864e-07	2.50974e-05	6.6524
ENSG00000140538.12	-2.78836	1.23952	-6.93335	3.29218e-07	2.62986e-05	6.63597
ENSG00000135298.9	-2.61311	4.50692	-6.91763	3.41762e-07	2.68853e-05	6.62216
ENSG00000170298.11	4.60577	-1.50223	7.43764	1.00872e-07	1.36292e-05	6.62018
ENSG00000104213.8	-2.68965	2.76259	-6.86136	3.90802e-07	2.90204e-05	6.61782
ENSG00000141504.7	-0.907732	4.82911	-6.95587	3.12066e-07	2.56415e-05	6.60711
ENSG00000112033.9	0.739026	5.20667	6.972	3.00342e-07	2.5118e-05	6.60008
ENSG00000105373.14	-1.338	8.34041	-7.01314	2.72442e-07	2.43983e-05	6.59416
ENSG00000168477.13	-1.88175	9.19785	-7.01069	2.74026e-07	2.43983e-05	6.58787
ENSG00000176438.8	-1.06027	6.24488	-6.99236	2.86189e-07	2.483e-05	6.5804
ENSG00000067057.12	1.22539	5.5082	6.96327	3.0663e-07	2.53972e-05	6.55948
ENSG00000135925.4	2.35856	1.98832	6.83473	4.16461e-07	2.97921e-05	6.53993
ENSG00000100503.19	-1.43107	9.40022	-6.98926	2.88302e-07	2.483e-05	6.53646
ENSG00000149557.8	-1.96935	4.68345	-6.90365	3.5333e-07	2.74893e-05	6.52838
ENSG00000104738.12	1.17925	5.7101	6.9453	3.19999e-07	2.60045e-05	6.50321
ENSG00000185947.10	0.857945	5.99384	6.95521	3.12557e-07	2.56415e-05	6.50243
ENSG00000120896.9	-0.705543	6.97245	-6.96618	3.04522e-07	2.53444e-05	6.49307
ENSG00000182103.3	-2.02704	0.769449	-6.88454	3.69785e-07	2.81887e-05	6.47208
ENSG00000185668.5	3.25345	1.97857	6.82344	4.27855e-07	3.02985e-05	6.47038
ENSG00000254445.1	-2.44777	1.98365	-6.80729	4.44711e-07	3.08095e-05	6.46707
ENSG00000173692.8	0.603305	7.00447	6.95315	3.14094e-07	2.56456e-05	6.46094
ENSG00000197299.6	1.38411	3.84802	6.8327	4.18487e-07	2.97921e-05	6.4573
ENSG00000185686.13	5.0659	4.77898	6.80477	4.47405e-07	3.08095e-05	6.43654
ENSG00000113810.11	1.08915	6.46424	6.93271	3.29725e-07	2.62986e-05	6.4296
ENSG00000148671.9	-1.56771	3.74744	-6.80868	4.43236e-07	3.08095e-05	6.42145
ENSG00000111206.8	2.99541	3.45661	6.78055	4.74113e-07	3.12661e-05	6.41549
ENSG00000100154.10	-0.860398	7.2366	-6.93405	3.28676e-07	2.62986e-05	6.412
ENSG00000149554.8	1.53976	2.84188	6.77293	4.82859e-07	3.163e-05	6.40942
ENSG00000178372.6	5.29621	4.91084	6.78181	4.72686e-07	3.12661e-05	6.39879
ENSG00000166401.9	1.85513	4.20004	6.81525	4.36317e-07	3.06811e-05	6.39036
ENSG00000146918.15	0.770941	5.56028	6.89539	3.6035e-07	2.77148e-05	6.38896
ENSG00000117724.8	2.01662	6.10337	6.9007	3.55823e-07	2.74893e-05	6.38795
ENSG00000132185.12	3.36903	0.372502	6.91765	3.41752e-07	2.68853e-05	6.37575
ENSG00000111335.8	2.02422	6.33884	6.90192	3.54791e-07	2.74893e-05	6.37514
ENSG00000051341.9	1.77707	4.03322	6.79426	4.58795e-07	3.12416e-05	6.35846
ENSG00000105227.10	-1.54256	3.98139	-6.78708	4.66759e-07	3.12661e-05	6.33638
ENSG00000070882.8	1.73891	5.66021	6.86581	3.86674e-07	2.88382e-05	6.32966
ENSG00000085831.11	4.03966	1.74256	6.76675	4.90058e-07	3.198e-05	6.31683
ENSG00000242732.3	-1.34736	3.19208	-6.74123	5.21009e-07	3.29998e-05	6.30791
ENSG00000139514.8	0.818597	5.70986	6.8663	3.86223e-07	2.88382e-05	6.30682
ENSG00000167191.7	-1.77312	5.42039	-6.84709	4.04352e-07	2.93362e-05	6.3062
ENSG00000167969.8	-0.774188	4.04981	-6.78328	4.71022e-07	3.12661e-05	6.30013
ENSG00000145147.15	-2.08439	6.00326	-6.85695	3.94937e-07	2.92016e-05	6.2934
ENSG00000129596.4	-3.48733	0.302102	-6.89086	3.64261e-07	2.78911e-05	6.28369
ENSG00000167526.9	-1.02885	9.41219	-6.88218	3.71875e-07	2.82232e-05	6.27937
ENSG00000197776.3	-1.09755	3.66507	-6.74718	5.13622e-07	3.28947e-05	6.27285
ENSG00000109685.13	1.01526	7.46995	6.87535	3.77977e-07	2.84358e-05	6.26848
ENSG00000198121.9	-1.12151	5.78297	-6.84614	4.05271e-07	2.93362e-05	6.25808
ENSG00000187951.6	1.5922	2.89432	6.70887	5.63145e-07	3.41615e-05	6.25722
ENSG00000189001.6	5.5388	6.46193	6.78629	4.67639e-07	3.12661e-05	6.24977
ENSG00000017483.10	1.62428	3.40915	6.71598	5.53598e-07	3.41615e-05	6.23654
ENSG00000154845.11	0.589716	6.65823	6.85228	3.99371e-07	2.93362e-05	6.22655
ENSG00000116815.11	1.30905	5.09871	6.8034	4.48874e-07	3.08095e-05	6.2219
ENSG00000019144.12	-0.958419	8.15343	-6.84289	4.08428e-07	2.9441e-05	6.18538
ENSG00000122861.11	1.59497	4.3366	6.74305	5.18738e-07	3.29998e-05	6.17897
ENSG00000124466.8	3.26488	6.04747	6.78891	4.64712e-07	3.12661e-05	6.17443
ENSG00000166682.6	-1.86502	2.22955	-6.66828	6.20943e-07	3.64926e-05	6.17013
ENSG00000169905.8	0.631175	7.65379	6.83417	4.1702e-07	2.97921e-05	6.16661
ENSG00000141084.6	0.948441	5.40663	6.7956	4.57332e-07	3.12416e-05	6.16483
ENSG00000197191.3	4.43337	0.621644	6.81145	4.40309e-07	3.08095e-05	6.14487
ENSG00000164930.7	1.20863	6.26226	6.8064	4.45654e-07	3.08095e-05	6.13523
ENSG00000114346.9	1.55133	4.41741	6.72403	5.42984e-07	3.38932e-05	6.13447
ENSG00000138778.7	1.92972	4.3492	6.71304	5.57522e-07	3.41615e-05	6.12446
ENSG00000103044.6	1.81888	4.64341	6.71257	5.58155e-07	3.41615e-05	6.087
ENSG00000146966.8	-1.9238	3.65242	-6.65419	6.42401e-07	3.71385e-05	6.07455
ENSG00000128487.12	1.3494	6.5455	6.78396	4.70264e-07	3.12661e-05	6.07187
ENSG00000175121.7	6.07554	0.572791	6.87852	3.75129e-07	2.83453e-05	6.06942
ENSG00000118432.11	-2.51124	1.86883	-6.63889	6.66558e-07	3.81511e-05	6.06774
ENSG00000116750.9	0.590543	5.4852	6.75972	4.984e-07	3.22798e-05	6.06774
ENSG00000039068.14	1.58664	7.44625	6.78279	4.7158e-07	3.12661e-05	6.04854
ENSG00000144554.6	1.19916	4.96062	6.72464	5.42199e-07	3.38932e-05	6.04627
ENSG00000163466.11	0.681372	7.5383	6.77935	4.75489e-07	3.12661e-05	6.03537
ENSG00000148219.12	-1.15222	3.48421	-6.6345	6.73657e-07	3.84297e-05	6.02886
ENSG00000115902.6	2.08373	5.27542	6.71019	5.61353e-07	3.41615e-05	6.00627
ENSG00000129667.8	1.16236	4.86998	6.70443	5.69195e-07	3.4287e-05	6.00301
ENSG00000158467.12	-1.78736	6.91177	-6.75611	5.0273e-07	3.24383e-05	5.99779
ENSG00000162913.9	-1.99427	0.205483	-6.73189	5.32833e-07	3.36251e-05	5.98735
ENSG00000170312.11	2.10915	2.64048	6.58197	7.64849e-07	4.13757e-05	5.97359
ENSG00000153291.11	-1.25548	5.0307	-6.69709	5.79334e-07	3.47762e-05	5.97299
ENSG00000166924.4	-2.08197	0.730476	-6.66365	6.27914e-07	3.66702e-05	5.9717
ENSG00000022267.12	-1.56056	4.60235	-6.66707	6.22754e-07	3.64926e-05	5.96955
ENSG00000168056.10	-0.867028	7.57953	-6.74858	5.11893e-07	3.28947e-05	5.96095
ENSG00000169583.12	2.76895	2.06834	6.58128	7.66127e-07	4.13757e-05	5.95558
ENSG00000007968.6	2.56383	1.39308	6.60058	7.31176e-07	4.06345e-05	5.95347
ENSG00000159399.5	1.6256	5.1139	6.68846	5.91488e-07	3.53825e-05	5.95292
ENSG00000156970.8	2.15722	3.23037	6.57158	7.84321e-07	4.18152e-05	5.92464
ENSG00000169607.8	2.41842	2.29548	6.56117	8.04355e-07	4.21198e-05	5.9216
ENSG00000023839.6	3.25721	4.56477	6.59837	7.35098e-07	4.07201e-05	5.91069
ENSG00000010438.12	5.63257	0.714048	6.74155	5.20614e-07	3.29998e-05	5.90742
ENSG00000120705.8	0.700499	6.3564	6.71505	5.54838e-07	3.41615e-05	5.90602
ENSG00000101935.5	1.12643	3.28058	6.56281	8.01163e-07	4.20806e-05	5.88025
ENSG00000160446.14	1.19709	3.59741	6.57881	7.7072e-07	4.14936e-05	5.88025
ENSG00000237649.3	2.005	3.25338	6.55409	8.18269e-07	4.25896e-05	5.87995
ENSG00000008256.11	1.1858	6.75005	6.705	5.6841e-07	3.4287e-05	5.87193
ENSG00000119938.8	-2.50221	4.38929	-6.59705	7.37442e-07	4.07201e-05	5.86847
ENSG00000136492.4	1.39224	4.04385	6.5845	7.60185e-07	4.13757e-05	5.84365
ENSG00000165192.9	-4.29078	0.940487	-6.62954	6.81762e-07	3.86876e-05	5.84231
ENSG00000105427.5	6.46332	2.41127	6.56801	7.91141e-07	4.18152e-05	5.83256
ENSG00000144579.3	-0.624232	5.99614	-6.67037	6.17836e-07	3.64771e-05	5.81434
ENSG00000151320.6	-0.998954	5.25777	-6.64409	6.58247e-07	3.78009e-05	5.81426
ENSG00000180871.3	2.63451	1.04217	6.57288	7.81864e-07	4.18152e-05	5.80697
ENSG00000214776.5	1.57412	4.98347	6.6205	6.96812e-07	3.9231e-05	5.80307
ENSG00000100433.11	2.6061	-0.307428	6.71361	5.56762e-07	3.41615e-05	5.79577
ENSG00000145332.9	-0.751476	4.68077	-6.60877	7.16852e-07	3.99674e-05	5.79277
ENSG00000069956.7	0.982881	6.79683	6.67008	6.18255e-07	3.64771e-05	5.7847
ENSG00000110811.15	-1.20779	4.19039	-6.5739	7.79941e-07	4.18152e-05	5.78461
ENSG00000166341.6	-1.21888	7.6842	-6.67444	6.11802e-07	3.6471e-05	5.78158
ENSG00000079432.3	-0.875775	8.17498	-6.67219	6.15118e-07	3.64771e-05	5.77231
ENSG00000165527.5	0.634765	6.17159	6.65507	6.41046e-07	3.71385e-05	5.76853
ENSG00000112742.5	2.37164	2.46714	6.49197	9.5142e-07	4.66982e-05	5.76539
ENSG00000120328.4	-1.80063	2.83113	-6.49506	9.44304e-07	4.65942e-05	5.76248
ENSG00000151117.4	1.41187	3.75452	6.53282	8.61571e-07	4.42237e-05	5.75941
ENSG00000185272.9	-3.03898	0.369114	-6.61798	7.01065e-07	3.93418e-05	5.75749
ENSG00000136688.6	6.66633	-0.678798	6.85	4.01544e-07	2.93362e-05	5.74626
ENSG00000123485.7	2.65641	2.70751	6.4821	9.74507e-07	4.75603e-05	5.74142
ENSG00000197217.8	0.72303	7.88525	6.65886	6.3521e-07	3.69709e-05	5.74088
ENSG00000188624.2	5.31595	-1.60744	6.92605	3.34983e-07	2.65949e-05	5.72273
ENSG00000105131.3	2.97389	3.29109	6.47273	9.96974e-07	4.79773e-05	5.70328
ENSG00000164611.8	2.15404	3.22492	6.47485	9.91846e-07	4.78642e-05	5.69817
ENSG00000163207.5	7.35955	3.60964	6.4781	9.84049e-07	4.76476e-05	5.68882
ENSG00000110218.4	1.0608	4.58757	6.55732	8.11891e-07	4.23856e-05	5.68618
ENSG00000101057.11	2.62949	2.63188	6.45525	1.04031e-06	4.94602e-05	5.67988
ENSG00000108381.6	-1.63219	4.38369	-6.52993	8.67635e-07	4.42237e-05	5.67045
ENSG00000086232.8	0.630302	7.74888	6.62899	6.8267e-07	3.86876e-05	5.66897
ENSG00000197928.6	-1.56996	2.85737	-6.45316	1.04561e-06	4.94602e-05	5.66166
ENSG00000150347.10	-0.735131	8.16149	-6.6266	6.86619e-07	3.87838e-05	5.66137
ENSG00000106789.8	1.4079	2.61477	6.44836	1.0579e-06	4.9661e-05	5.65959
ENSG00000186806.5	2.80799	3.34647	6.45286	1.04639e-06	4.94602e-05	5.64672
ENSG00000188783.5	-1.52769	6.21153	-6.59256	7.45505e-07	4.09031e-05	5.62651
ENSG00000135063.13	-1.62308	4.77395	-6.53124	8.64886e-07	4.42237e-05	5.62103
ENSG00000124159.11	-4.54631	-0.292619	-6.76025	4.97764e-07	3.22798e-05	5.61904
ENSG00000257365.3	0.855004	4.02071	6.49551	9.43259e-07	4.65942e-05	5.61288
ENSG00000081014.6	0.627476	5.29654	6.56619	7.94638e-07	4.18655e-05	5.61219
ENSG00000188505.4	4.76234	3.27249	6.42552	1.11845e-06	5.16585e-05	5.61037
ENSG00000139263.7	-0.974877	6.91304	-6.59553	7.40171e-07	4.07402e-05	5.60073
ENSG00000069702.6	-1.17126	6.40131	-6.5881	7.53588e-07	4.12153e-05	5.59993
ENSG00000157150.4	-4.10857	-0.152658	-6.649	6.5049e-07	3.74804e-05	5.59374
ENSG00000154447.10	-1.05995	5.68797	-6.56795	7.91255e-07	4.18152e-05	5.59109
ENSG00000244617.1	3.65116	5.20248	6.49429	9.4606e-07	4.65942e-05	5.58613
ENSG00000131747.10	2.38849	5.28807	6.52591	8.76134e-07	4.44535e-05	5.57939
ENSG00000182585.5	4.67993	-1.52394	6.84774	4.03725e-07	2.93362e-05	5.56822
ENSG00000143434.11	-1.15387	4.38914	-6.49406	9.46598e-07	4.65942e-05	5.56758
ENSG00000137872.11	1.58927	5.17122	6.5304	8.66644e-07	4.42237e-05	5.56304
ENSG00000169900.3	4.7785	-1.26296	6.82221	4.29117e-07	3.02985e-05	5.54334
ENSG00000156802.8	1.3095	5.07372	6.51465	9.00416e-07	4.54908e-05	5.52769
ENSG00000176658.12	0.617054	7.81315	6.57016	7.87033e-07	4.18152e-05	5.52506
ENSG00000152580.8	-2.41387	6.18804	-6.52536	8.77304e-07	4.44535e-05	5.49067
ENSG00000185306.8	5.79252	-0.565185	6.72554	5.41025e-07	3.38932e-05	5.49023
ENSG00000118193.7	2.4694	2.85947	6.37641	1.26087e-06	5.67161e-05	5.48762
ENSG00000170426.1	4.88286	0.950409	6.46505	1.01578e-06	4.87459e-05	5.47943
ENSG00000213366.8	-1.32547	6.52507	-6.53624	8.54461e-07	4.40738e-05	5.47063
ENSG00000139496.11	0.65839	7.12733	6.54277	8.41029e-07	4.36423e-05	5.46619
ENSG00000142731.6	1.28738	3.52987	6.39916	1.19273e-06	5.39643e-05	5.45816
ENSG00000146072.6	1.63837	5.61583	6.50453	9.22819e-07	4.63267e-05	5.4537
ENSG00000104343.15	0.803224	7.60592	6.53629	8.54362e-07	4.40738e-05	5.44459
ENSG00000175793.10	4.27908	5.6804	6.44059	1.07812e-06	5.00644e-05	5.44049
ENSG00000169469.7	6.61351	4.59443	6.35418	1.33129e-06	5.80102e-05	5.43903
ENSG00000101986.8	1.05825	4.5198	6.44885	1.05665e-06	4.9661e-05	5.42994
ENSG00000109805.5	2.70013	3.14574	6.35357	1.33328e-06	5.80102e-05	5.42396
ENSG00000146670.5	1.90024	3.1014	6.35666	1.32325e-06	5.80073e-05	5.41744
ENSG00000204539.3	6.58131	4.6701	6.34562	1.35948e-06	5.86994e-05	5.41615
ENSG00000129534.9	0.841126	6.03854	6.50548	9.207e-07	4.63267e-05	5.4122
ENSG00000126562.12	-2.50826	5.15023	-6.45227	1.04788e-06	4.94602e-05	5.41057
ENSG00000168060.10	-1.63512	2.57675	-6.34203	1.37149e-06	5.907e-05	5.40905
ENSG00000176624.9	0.661066	5.91663	6.49668	9.40594e-07	4.65942e-05	5.3962
ENSG00000162631.14	-4.34637	3.1294	-6.33165	1.40677e-06	5.99896e-05	5.38997
ENSG00000155265.6	1.71639	2.13539	6.32877	1.41674e-06	6.00402e-05	5.38424
ENSG00000100078.3	4.64558	0.207788	6.50234	9.27729e-07	4.63273e-05	5.37883
ENSG00000177469.12	-0.976827	6.79627	-6.50354	9.25027e-07	4.63267e-05	5.37847
ENSG00000057149.10	8.13277	3.00797	6.37284	1.27192e-06	5.70641e-05	5.37096
ENSG00000136895.14	-0.888118	5.25891	-6.46244	1.02225e-06	4.89202e-05	5.36846
ENSG00000151239.9	0.723194	5.80447	6.47787	9.84592e-07	4.76476e-05	5.3571
ENSG00000100307.8	-1.10784	4.26074	-6.40176	1.18518e-06	5.38741e-05	5.35351
ENSG00000171916.12	4.47235	-1.20465	6.70957	5.62197e-07	3.41615e-05	5.35079
ENSG00000033050.3	0.566479	6.06111	6.48002	9.79458e-07	4.76476e-05	5.34663
ENSG00000099282.5	-1.30129	5.18659	-6.44351	1.07049e-06	4.99794e-05	5.34468
ENSG00000162552.10	3.25429	1.96183	6.31618	1.46109e-06	6.12342e-05	5.34342
ENSG00000048405.5	0.642373	6.75418	6.48643	9.64311e-07	4.71965e-05	5.33631
ENSG00000137648.12	4.26133	1.72137	6.32828	1.41841e-06	6.00402e-05	5.32727
ENSG00000183569.13	-1.57304	0.645139	-6.36081	1.3099e-06	5.77291e-05	5.31822
ENSG00000170962.8	-1.88566	4.21088	-6.36681	1.29081e-06	5.76114e-05	5.30684
ENSG00000153237.13	-1.84783	0.908405	-6.33676	1.38928e-06	5.96041e-05	5.29103
ENSG00000197632.4	5.87116	1.60436	6.36071	1.3102e-06	5.77291e-05	5.2754
ENSG00000125378.11	-1.40731	3.71086	-6.3292	1.41522e-06	6.00402e-05	5.27099
ENSG00000151338.14	-1.06467	3.75262	-6.32538	1.42855e-06	6.03212e-05	5.25133
ENSG00000123384.9	-0.995162	10.8586	-6.45355	1.04461e-06	4.94602e-05	5.24298
ENSG00000105173.9	1.57741	1.55295	6.27858	1.6022e-06	6.53046e-05	5.24198
ENSG00000073712.9	-0.906488	5.71241	-6.42587	1.11749e-06	5.16585e-05	5.24032
ENSG00000164620.4	1.37907	1.49252	6.27586	1.61296e-06	6.53046e-05	5.23539
ENSG00000174371.12	1.95919	2.43742	6.26439	1.659e-06	6.55533e-05	5.23311
ENSG00000112242.10	1.29372	3.7764	6.31526	1.46439e-06	6.12342e-05	5.22603
ENSG00000172458.4	-2.95753	1.59982	-6.27219	1.62753e-06	6.53046e-05	5.21581
ENSG00000186226.7	5.23629	-1.04027	6.61174	7.11714e-07	3.98098e-05	5.213
ENSG00000119865.4	-1.55519	5.48955	-6.39892	1.19343e-06	5.39643e-05	5.21201
ENSG00000147689.12	3.95169	3.67203	6.26519	1.65577e-06	6.55533e-05	5.21086
ENSG00000165390.11	4.1805	3.41271	6.25565	1.69501e-06	6.60847e-05	5.20675
ENSG00000170153.6	-1.79315	3.17401	-6.27092	1.63262e-06	6.53046e-05	5.20079
ENSG00000163808.12	1.78201	2.6241	6.25168	1.71165e-06	6.65651e-05	5.19637
ENSG00000152582.8	-1.44154	4.70532	-6.35353	1.33341e-06	5.80102e-05	5.1915
ENSG00000139044.6	1.87502	4.01489	6.30287	1.50953e-06	6.25148e-05	5.18058
ENSG00000166446.10	1.33013	2.81532	6.24771	1.72839e-06	6.70648e-05	5.16735
ENSG00000185963.9	1.15248	7.24564	6.42007	1.13342e-06	5.22098e-05	5.16574
ENSG00000076555.11	-1.25642	7.00271	-6.41407	1.15012e-06	5.26977e-05	5.1569
ENSG00000126070.14	-0.508981	6.13927	-6.40248	1.1831e-06	5.38741e-05	5.15283
ENSG00000060237.12	0.552945	9.81258	6.41806	1.13899e-06	5.23267e-05	5.1516
ENSG00000170145.4	-0.606751	6.41033	-6.40578	1.17363e-06	5.3632e-05	5.14966
ENSG00000149294.12	-3.16424	4.24911	-6.27168	1.62958e-06	6.53046e-05	5.14192
ENSG00000189057.6	2.08043	2.78587	6.23036	1.80373e-06	6.89015e-05	5.14014
ENSG00000171451.13	-1.31223	4.95701	-6.34879	1.34898e-06	5.85395e-05	5.13654
ENSG00000185420.14	-0.893161	4.83565	-6.3467	1.35589e-06	5.86918e-05	5.13324
ENSG00000116151.9	-0.920945	3.6266	-6.27028	1.63521e-06	6.53046e-05	5.12717
ENSG00000100626.12	-2.12031	3.64565	-6.25583	1.69426e-06	6.60847e-05	5.1258
ENSG00000165475.9	-1.5342	5.68499	-6.37158	1.27584e-06	5.70915e-05	5.12064
ENSG00000138160.4	1.57728	3.71582	6.26105	1.67267e-06	6.57919e-05	5.11221
ENSG00000127507.13	1.64624	4.24253	6.28614	1.57276e-06	6.46384e-05	5.09894
ENSG00000159346.8	0.651081	6.74747	6.38599	1.23172e-06	5.55498e-05	5.09024
ENSG00000175161.9	-3.86	-0.419681	-6.44704	1.06131e-06	4.96857e-05	5.08799
ENSG00000143546.5	6.25201	4.30375	6.20548	1.91762e-06	7.12001e-05	5.08741
ENSG00000114251.9	2.26426	2.8879	6.20561	1.91703e-06	7.12001e-05	5.08265
ENSG00000172382.5	2.73926	1.39523	6.21135	1.8901e-06	7.05364e-05	5.07852
ENSG00000144063.3	2.65365	3.018	6.20096	1.9391e-06	7.17623e-05	5.0666
ENSG00000138346.10	1.05612	3.18852	6.21895	1.85507e-06	6.97799e-05	5.06607
ENSG00000171320.10	2.2854	2.5497	6.18688	2.00754e-06	7.31202e-05	5.05001
ENSG00000067113.12	-1.11804	4.88499	-6.31164	1.47743e-06	6.14812e-05	5.04803
ENSG00000213186.3	1.71759	3.4862	6.22281	1.83753e-06	6.9657e-05	5.04716
ENSG00000198554.7	0.783866	4.44837	6.28535	1.57582e-06	6.46384e-05	5.03785
ENSG00000126785.8	-0.966358	4.78742	-6.2977	1.52881e-06	6.31615e-05	5.02253
ENSG00000125741.4	0.790385	5.64147	6.3353	1.39427e-06	5.96041e-05	5.02251
ENSG00000170276.4	-2.53664	2.17443	-6.17392	2.0727e-06	7.41763e-05	5.02222
ENSG00000197748.8	-1.58879	1.67785	-6.17833	2.05027e-06	7.38955e-05	5.022
ENSG00000167553.10	1.33401	7.31924	6.36106	1.3091e-06	5.77291e-05	5.0207
ENSG00000154262.8	-1.58882	7.57364	-6.36123	1.30854e-06	5.77291e-05	5.01923
ENSG00000178295.10	0.95491	5.29343	6.32063	1.44525e-06	6.08772e-05	5.01783
ENSG00000182572.2	1.86278	3.10364	6.18872	1.99846e-06	7.30985e-05	5.01405
ENSG00000149573.4	2.62465	3.42276	6.18986	1.99286e-06	7.30488e-05	5.01303
ENSG00000165821.7	-1.00034	4.04664	-6.24542	1.73817e-06	6.71816e-05	5.00613
ENSG00000188373.4	7.17675	-0.329386	6.44105	1.07692e-06	5.00644e-05	5.00071
ENSG00000115488.3	4.64961	-0.14696	6.35918	1.31513e-06	5.77986e-05	4.98204
ENSG00000067840.8	-1.59926	3.3642	-6.1877	2.00349e-06	7.31202e-05	4.97825
ENSG00000203785.4	8.35563	2.70408	6.22071	1.84708e-06	6.9657e-05	4.96707
ENSG00000129455.11	5.03226	2.02135	6.16257	2.13153e-06	7.58106e-05	4.95451
ENSG00000186832.4	5.20806	5.91278	6.22756	1.81622e-06	6.90726e-05	4.93932
ENSG00000163001.7	-0.597788	4.87521	-6.27113	1.63179e-06	6.53046e-05	4.93875
ENSG00000180667.6	1.23038	4.71387	6.25554	1.69546e-06	6.60847e-05	4.93513
ENSG00000084110.6	5.91438	2.82654	6.14267	2.23883e-06	7.85551e-05	4.9344
ENSG00000157456.3	2.83337	2.29843	6.1339	2.2878e-06	7.9145e-05	4.92801
ENSG00000011426.6	2.82661	4.12497	6.18092	2.03723e-06	7.38893e-05	4.92348
ENSG00000117036.7	0.612434	6.20571	6.3099	1.48374e-06	6.15949e-05	4.92203
ENSG00000077264.10	-2.02122	1.38931	-6.14676	2.21631e-06	7.82429e-05	4.92126
ENSG00000032742.13	-0.8865	5.42836	-6.28639	1.57181e-06	6.46384e-05	4.92069
ENSG00000165424.6	-0.989181	5.19244	-6.27554	1.61422e-06	6.53046e-05	4.9188
ENSG00000141198.9	0.923325	5.20369	6.27436	1.61889e-06	6.53046e-05	4.91563
ENSG00000088543.10	-0.818481	3.53936	-6.17892	2.04732e-06	7.38955e-05	4.91433
ENSG00000269855.1	3.2389	0.447521	6.22858	1.81166e-06	6.90515e-05	4.91385
ENSG00000142937.7	-0.866498	9.22373	-6.31912	1.4506e-06	6.09535e-05	4.90728
ENSG00000162733.12	-0.960704	7.09831	-6.31389	1.46931e-06	6.12913e-05	4.90613
ENSG00000175356.8	3.08954	5.37022	6.24039	1.7598e-06	6.78162e-05	4.89882
ENSG00000173258.8	-1.12391	5.21223	-6.26629	1.65131e-06	6.555e-05	4.89596
ENSG00000122490.14	-0.935872	4.61991	-6.23466	1.78479e-06	6.83295e-05	4.89327
ENSG00000229586.2	3.5565	-0.702479	6.36268	1.30392e-06	5.77291e-05	4.8922
ENSG00000106415.8	0.951112	4.27691	6.21268	1.88394e-06	7.05364e-05	4.88854
ENSG00000173457.6	0.833234	5.53041	6.27407	1.62006e-06	6.53046e-05	4.88246
ENSG00000085999.7	1.75749	1.78577	6.11627	2.38964e-06	8.18465e-05	4.881
ENSG00000148773.8	2.32776	6.26095	6.28044	1.59493e-06	6.52673e-05	4.87842
ENSG00000230088.1	3.61976	-2.25191	6.58235	7.64139e-07	4.13757e-05	4.8735
ENSG00000042493.11	1.73586	5.46341	6.25592	1.6939e-06	6.60847e-05	4.85719
ENSG00000213722.4	-0.829882	4.56114	-6.21104	1.89156e-06	7.05364e-05	4.83672
ENSG00000144802.7	1.48359	6.19502	6.26706	1.64817e-06	6.555e-05	4.82773
ENSG00000188508.6	6.01112	4.22154	6.08667	2.57113e-06	8.58437e-05	4.8073
ENSG00000076554.11	1.48641	4.43727	6.1794	2.04488e-06	7.38955e-05	4.80583
ENSG00000186185.9	2.22454	2.47406	6.07976	2.61547e-06	8.64863e-05	4.79926
ENSG00000157827.15	-1.26957	7.26039	-6.2697	1.63754e-06	6.53046e-05	4.79555
ENSG00000159455.7	7.18745	1.86638	6.16206	2.13421e-06	7.58106e-05	4.79521
ENSG00000169562.9	3.20645	4.60967	6.14079	2.24922e-06	7.85994e-05	4.787
ENSG00000145687.11	-1.00703	5.23098	-6.22056	1.84776e-06	6.9657e-05	4.78419
ENSG00000148908.10	1.27122	4.42754	6.17341	2.07528e-06	7.41763e-05	4.77594
ENSG00000117791.11	-0.951913	3.14551	-6.09518	2.51758e-06	8.46289e-05	4.77134
ENSG00000171862.5	-0.744071	7.55128	-6.26195	1.66897e-06	6.57919e-05	4.77056
ENSG00000101928.8	0.722726	3.4989	6.11433	2.40117e-06	8.2078e-05	4.76803
ENSG00000143867.5	-2.00018	2.70422	-6.06721	2.69804e-06	8.87057e-05	4.75735
ENSG00000173218.10	0.827586	4.70266	6.18517	2.01601e-06	7.32739e-05	4.75614
ENSG00000088367.16	-1.28876	5.02604	-6.19192	1.98272e-06	7.29878e-05	4.73999
ENSG00000064601.12	0.770169	7.02788	6.24518	1.7392e-06	6.71816e-05	4.73639
ENSG00000182782.7	2.56556	2.04589	6.05313	2.79381e-06	9.06043e-05	4.736
ENSG00000125571.5	6.29491	-0.974916	6.33571	1.39284e-06	5.96041e-05	4.72469
ENSG00000163545.7	2.5671	2.16528	6.04674	2.83837e-06	9.10606e-05	4.72295
ENSG00000203786.5	7.47527	3.64652	6.04765	2.83197e-06	9.10247e-05	4.71853
ENSG00000185966.3	6.54674	0.588563	6.22136	1.84411e-06	6.9657e-05	4.71676
ENSG00000196912.8	-1.05821	7.38783	-6.23771	1.77143e-06	6.79692e-05	4.71364
ENSG00000197258.5	-1.7456	4.28633	-6.13047	2.30726e-06	7.96582e-05	4.70619
ENSG00000163220.10	5.54004	4.47476	6.05501	2.7808e-06	9.06043e-05	4.70019
ENSG00000140254.8	2.97727	5.4054	6.1584	2.15356e-06	7.61838e-05	4.6928
ENSG00000198018.6	0.909015	4.45514	6.14311	2.23639e-06	7.85551e-05	4.68975
ENSG00000181234.8	-2.02451	1.84497	-6.03118	2.95003e-06	9.3597e-05	4.67913
ENSG00000187416.7	-3.96761	3.45449	-6.04231	2.86977e-06	9.16244e-05	4.67765
ENSG00000184445.7	0.858123	6.35931	6.21201	1.88706e-06	7.05364e-05	4.67675
ENSG00000107719.8	-1.05134	5.03712	-6.1601	2.14455e-06	7.60214e-05	4.65464
ENSG00000002016.12	-0.773007	3.78865	-6.08223	2.59958e-06	8.61716e-05	4.64252
ENSG00000175305.12	2.4467	1.10014	6.02939	2.96314e-06	9.384e-05	4.63993
ENSG00000134851.8	0.673784	6.12894	6.1932	1.97651e-06	7.2915e-05	4.63725
ENSG00000169230.5	0.474227	6.08618	6.19106	1.98696e-06	7.29878e-05	4.63379
ENSG00000106689.6	-2.52966	2.86542	-6.01596	3.0636e-06	9.6666e-05	4.62893
ENSG00000135655.9	0.662471	7.59519	6.20054	1.9411e-06	7.17623e-05	4.61804
ENSG00000187741.10	1.1618	4.5886	6.12091	2.3624e-06	8.10747e-05	4.61792
ENSG00000144218.14	-1.8216	6.08178	-6.17435	2.07048e-06	7.41763e-05	4.61184
ENSG00000139910.15	-2.31079	2.79675	-6.00694	3.13294e-06	9.76858e-05	4.61047
ENSG00000174483.15	-0.655421	4.7424	-6.12958	2.31233e-06	7.96736e-05	4.60942
ENSG00000173947.9	-1.92097	-0.352447	-6.13966	2.2555e-06	7.86594e-05	4.6081
ENSG00000187223.3	6.29745	0.737938	6.14579	2.22162e-06	7.827e-05	4.60591
ENSG00000155511.13	-4.99333	3.68745	-6.00134	3.17681e-06	9.84354e-05	4.60386
ENSG00000176920.10	2.89806	0.477923	6.05374	2.78961e-06	9.06043e-05	4.60123
ENSG00000174442.7	0.803051	4.24257	6.09407	2.5245e-06	8.46289e-05	4.59657
ENSG00000215018.5	-3.10646	3.47964	-6.01292	3.08675e-06	9.70412e-05	4.59533
ENSG00000135338.9	-1.09878	3.74978	-6.05466	2.78327e-06	9.06043e-05	4.5907
ENSG00000234964.3	4.70135	2.64435	5.98851	3.27964e-06	0.000100749	4.58651
ENSG00000187180.3	6.76782	1.4331	6.08354	2.59115e-06	8.61716e-05	4.58392
ENSG00000169991.6	1.73626	5.34717	6.13412	2.28657e-06	7.9145e-05	4.57938
ENSG00000144580.9	0.471954	5.20346	6.14122	2.24683e-06	7.85994e-05	4.57752
ENSG00000114670.9	-0.748599	3.29336	-6.02112	3.0246e-06	9.56108e-05	4.56989
ENSG00000156050.4	-0.949366	3.22026	-6.01437	3.0757e-06	9.68703e-05	4.56574
ENSG00000138180.11	2.58179	1.81391	5.98295	3.32525e-06	0.000101394	4.56488
ENSG00000137098.9	-1.34302	2.00712	-5.97677	3.37671e-06	0.000102419	4.55862
ENSG00000174348.9	-1.62631	5.62573	-6.13778	2.266e-06	7.88658e-05	4.55361
ENSG00000179915.16	-4.48794	2.94493	-5.97096	3.42586e-06	0.000102801	4.54467
ENSG00000168528.7	2.39503	4.35961	6.04774	2.83139e-06	9.10247e-05	4.5369
ENSG00000134201.6	-2.42917	2.06659	-5.96293	3.49494e-06	0.000103541	4.52603
ENSG00000142627.9	1.6951	5.26173	6.11118	2.41991e-06	8.25547e-05	4.52477
ENSG00000214274.5	-1.39873	2.43442	-5.965	3.47704e-06	0.00010336	4.52106
ENSG00000103942.8	1.85625	4.0867	6.03392	2.93009e-06	9.31358e-05	4.51248
ENSG00000109674.3	2.84993	1.28934	5.9707	3.42805e-06	0.000102801	4.51133
ENSG00000240386.2	5.7006	-0.100271	6.17427	2.07091e-06	7.41763e-05	4.48521
ENSG00000136689.14	3.00992	2.13011	5.94351	3.66797e-06	0.000106743	4.48041
ENSG00000065328.12	1.88089	1.69438	5.94414	3.66224e-06	0.000106743	4.47486
ENSG00000173065.9	0.569641	5.90974	6.12232	2.3542e-06	8.09543e-05	4.47456
ENSG00000049759.12	1.79001	4.75961	6.05894	2.75386e-06	9.01967e-05	4.46869
ENSG00000118816.5	-0.715073	8.36214	-6.1366	2.27262e-06	7.8937e-05	4.45557
ENSG00000167757.9	5.75689	2.06255	5.95105	3.59974e-06	0.00010565	4.45301
ENSG00000111728.6	1.33664	3.96567	6.00881	3.11841e-06	9.76858e-05	4.45067
ENSG00000119771.10	-1.25189	4.6681	-6.05255	2.79786e-06	9.06043e-05	4.44521
ENSG00000152484.9	0.550097	5.48525	6.09412	2.52418e-06	8.46289e-05	4.43418
ENSG00000006432.11	1.72727	3.58386	5.9711	3.4247e-06	0.000102801	4.43159
ENSG00000103811.11	1.2744	6.05872	6.09988	2.48847e-06	8.43926e-05	4.41965
ENSG00000163472.14	2.25738	4.37423	6.00779	3.12635e-06	9.76858e-05	4.4195
ENSG00000143507.13	1.08374	4.59597	6.04015	2.88512e-06	9.1876e-05	4.41853
ENSG00000174599.4	-1.41661	2.54306	-5.92445	3.84617e-06	0.000110253	4.41701
ENSG00000197380.6	-1.73333	2.30982	-5.91947	3.89421e-06	0.000110859	4.41581
ENSG00000143756.7	0.585661	5.93034	6.09714	2.50539e-06	8.46289e-05	4.41205
ENSG00000179477.5	6.58996	2.74229	5.9318	3.77644e-06	0.000108615	4.41183
ENSG00000111665.7	1.78655	1.68	5.90943	3.99279e-06	0.000112582	4.39449
ENSG00000132669.8	-0.807256	6.47446	-6.10091	2.48218e-06	8.4345e-05	4.39377
ENSG00000080503.15	-0.514938	8.25496	-6.10501	2.45714e-06	8.36593e-05	4.37707
ENSG00000184357.3	2.13934	4.19751	5.97813	3.36535e-06	0.000102254	4.37513
ENSG00000219481.6	-0.900772	6.75012	-6.094	2.52492e-06	8.46289e-05	4.36884
ENSG00000221926.7	1.13882	5.23637	6.05302	2.79454e-06	9.06043e-05	4.36688
ENSG00000165474.5	3.88332	4.89269	5.97111	3.42458e-06	0.000102801	4.36585
ENSG00000158315.6	3.058	1.2476	5.90778	4.00932e-06	0.000112864	4.3623
ENSG00000100316.11	-0.922307	10.3417	-6.09585	2.51338e-06	8.46289e-05	4.35667
ENSG00000040341.13	0.684973	6.86478	6.08961	2.55249e-06	8.53871e-05	4.35469
ENSG00000148737.11	-0.866976	6.57421	-6.0839	2.58885e-06	8.61716e-05	4.35053
ENSG00000126391.9	0.68652	4.43541	6.0039	3.15663e-06	9.79863e-05	4.33897
ENSG00000186207.4	5.19699	-1.21086	6.16663	2.11026e-06	7.52703e-05	4.3359
ENSG00000167037.14	-2.16236	2.15901	-5.8819	4.27652e-06	0.000116761	4.33417
ENSG00000144285.11	-3.95299	-1.77507	-6.23953	1.7635e-06	6.78162e-05	4.33212
ENSG00000122406.8	-0.923499	9.42739	-6.08201	2.60095e-06	8.61716e-05	4.32006
ENSG00000143753.8	1.30435	6.78224	6.06897	2.6863e-06	8.84886e-05	4.31023
ENSG00000148303.12	-0.84169	9.26191	-6.07497	2.64667e-06	8.73501e-05	4.30231
ENSG00000170006.7	2.59748	3.56861	5.90067	4.08099e-06	0.000113771	4.29541
ENSG00000078081.3	2.55309	3.44505	5.89139	4.17654e-06	0.000115174	4.28814
ENSG00000118503.10	1.30142	5.89278	6.04201	2.87191e-06	9.16244e-05	4.28635
ENSG00000167754.8	6.16988	3.7066	5.86006	4.51612e-06	0.000121547	4.28207
ENSG00000118939.13	0.876783	4.30235	5.96929	3.44012e-06	0.000102893	4.27953
ENSG00000162706.8	-2.83857	3.26539	-5.86914	4.41486e-06	0.000119402	4.25778
ENSG00000182636.4	-1.3623	3.98847	-5.9329	3.76607e-06	0.000108498	4.2567
ENSG00000127870.12	0.551255	6.48038	6.04551	2.84705e-06	9.1169e-05	4.255
ENSG00000154114.8	-0.709527	5.14428	-6.0064	3.13716e-06	9.76858e-05	4.25329
ENSG00000138615.4	-2.7984	3.78753	-5.89434	4.14592e-06	0.000115017	4.25311
ENSG00000174804.3	-1.09329	4.68068	-5.97285	3.4098e-06	0.000102801	4.24593
ENSG00000124831.14	0.580894	8.26305	6.0513	2.80653e-06	9.07145e-05	4.24326
ENSG00000147697.4	5.01348	2.66638	5.84419	4.69867e-06	0.000124536	4.24154
ENSG00000164587.7	-0.848483	8.13313	-6.05008	2.81499e-06	9.08178e-05	4.24133
ENSG00000088325.11	2.32801	3.69497	5.88701	4.22233e-06	0.00011582	4.2369
ENSG00000143353.7	-1.0263	5.41748	-6.00587	3.14128e-06	9.76858e-05	4.23066
ENSG00000203782.5	7.36846	2.89224	5.85514	4.57192e-06	0.000122496	4.22734
ENSG00000093009.5	2.67663	1.26723	5.84575	4.68041e-06	0.000124244	4.22592
ENSG00000171502.10	-2.2624	4.78089	-5.94943	3.61428e-06	0.000105716	4.22326
ENSG00000172752.10	4.25064	3.84818	5.85092	4.62036e-06	0.000122851	4.22258
ENSG00000163202.4	7.92286	1.11689	5.99792	3.20392e-06	9.89195e-05	4.21945
ENSG00000057657.10	2.039	5.1006	5.96712	3.45873e-06	0.000103092	4.2106
ENSG00000182481.4	1.65787	5.19014	5.97568	3.3859e-06	0.000102517	4.19968
ENSG00000182175.9	-1.60845	3.70091	-5.88641	4.22864e-06	0.00011582	4.19444
ENSG00000034063.9	2.22649	2.77728	5.83241	4.83899e-06	0.000126904	4.18788
ENSG00000111962.7	-0.764452	4.59475	-5.94752	3.63156e-06	0.000106042	4.18609
ENSG00000138587.5	-1.3556	3.01201	-5.83983	4.75011e-06	0.000125321	4.17431
ENSG00000163535.13	1.03994	4.24414	5.91892	3.89951e-06	0.000110859	4.1742
ENSG00000165626.12	-1.28243	2.27946	-5.81774	5.01982e-06	0.000129628	4.17388
ENSG00000109576.9	-1.25127	3.36061	-5.85975	4.51961e-06	0.000121547	4.16941
ENSG00000171130.13	1.18921	3.30374	5.8528	4.59867e-06	0.000122755	4.16407
ENSG00000258405.5	-1.41482	2.00806	-5.80895	5.13132e-06	0.000131356	4.16228
ENSG00000166575.12	-0.85532	5.04832	-5.96122	3.50987e-06	0.000103541	4.15524
ENSG00000144452.10	4.32565	6.02978	5.93742	3.72401e-06	0.000107827	4.15325
ENSG00000173801.12	2.04267	7.53484	6.00836	3.1219e-06	9.76858e-05	4.14791
ENSG00000172638.8	-1.02215	5.33014	-5.97035	3.43108e-06	0.000102801	4.14677
ENSG00000136696.6	4.81257	-0.919579	6.06403	2.7194e-06	8.92378e-05	4.14455
ENSG00000076382.12	1.27464	4.05506	5.89132	4.17725e-06	0.000115174	4.13862
ENSG00000133789.10	-0.814842	7.29112	-5.99968	3.18991e-06	9.86638e-05	4.12277
ENSG00000145283.7	2.74149	2.49175	5.79435	5.32221e-06	0.000133987	4.12108
ENSG00000100139.9	0.876468	6.41714	5.98809	3.28306e-06	0.000100749	4.11651
ENSG00000196678.9	0.746174	5.50875	5.96468	3.47973e-06	0.00010336	4.1152
ENSG00000111602.7	1.08018	4.62823	5.91908	3.898e-06	0.000110859	4.11304
ENSG00000165795.16	-1.0944	6.70301	-5.98766	3.28656e-06	0.000100749	4.1087
ENSG00000113369.4	-1.12917	7.23513	-5.99071	3.26178e-06	0.000100526	4.10263
ENSG00000248587.2	-4.32424	-0.51345	-5.98653	3.29583e-06	0.000100831	4.10203
ENSG00000154678.12	-3.13386	2.57932	-5.78632	5.43031e-06	0.000135193	4.10182
ENSG00000137266.10	1.51423	4.12829	5.87794	4.31898e-06	0.000117362	4.10154
ENSG00000161800.8	1.22592	3.86648	5.8595	4.52238e-06	0.000121547	4.10143
ENSG00000157224.11	0.730124	5.29652	5.94978	3.61118e-06	0.000105716	4.09841
ENSG00000125398.5	-1.24126	6.1084	-5.96749	3.45557e-06	0.000103092	4.08652
ENSG00000196754.6	3.68113	4.54879	5.84097	4.73663e-06	0.000125158	4.0863
ENSG00000113580.10	-0.577479	7.60588	-5.9859	3.30095e-06	0.000100831	4.08388
ENSG00000143228.8	1.93109	1.4953	5.77852	5.53741e-06	0.000136674	4.08129
ENSG00000142279.8	-1.02695	3.46057	-5.83237	4.83956e-06	0.000126904	4.07862
ENSG00000167658.11	-0.790063	10.8453	-5.97964	3.35277e-06	0.000102052	4.06919
ENSG00000034239.6	-3.73134	-0.755479	-5.96217	3.50155e-06	0.000103541	4.0633
ENSG00000064763.6	-1.93253	5.80269	-5.93959	3.70393e-06	0.000107426	4.05766
ENSG00000126947.7	-0.931739	5.526	-5.94055	3.6951e-06	0.000107351	4.05524
ENSG00000110318.9	-1.13952	5.13477	-5.92035	3.88568e-06	0.000110859	4.05251
ENSG00000166105.11	4.11142	0.631135	5.8159	5.0429e-06	0.00012967	4.04997
ENSG00000182272.7	-1.68037	4.71772	-5.89122	4.17829e-06	0.000115174	4.04817
ENSG00000188100.8	6.9696	0.788082	5.90473	4.03987e-06	0.000112985	4.04262
ENSG00000187173.3	3.75083	1.92118	5.76227	5.76741e-06	0.000141093	4.04179
ENSG00000139734.13	2.3649	3.12414	5.78134	5.49845e-06	0.000136103	4.04151
ENSG00000115474.6	-2.83379	4.39218	-5.83415	4.81797e-06	0.000126724	4.03765
ENSG00000176853.11	0.570931	6.78928	5.95795	3.53846e-06	0.000104028	4.02733
ENSG00000197084.4	5.52129	1.89748	5.76694	5.70035e-06	0.000139894	4.02257
ENSG00000163682.11	-0.785171	8.85809	-5.96131	3.50907e-06	0.000103541	4.0185
ENSG00000159871.10	3.24238	2.22962	5.74901	5.96222e-06	0.000144266	4.01834
ENSG00000198242.9	-0.757123	8.16535	-5.95825	3.53589e-06	0.000104028	4.01189
ENSG00000152137.2	1.76035	3.57247	5.79744	5.28126e-06	0.000133637	4.01095
ENSG00000151892.10	-1.95586	4.14533	-5.82542	4.92431e-06	0.000128539	4.00594
ENSG00000145247.7	1.70689	2.36584	5.74526	6.01853e-06	0.00014522	4.00265
ENSG00000259030.2	-1.44746	3.19325	-5.77342	5.60853e-06	0.000138231	3.99017
ENSG00000159516.8	8.21726	2.18481	5.80143	5.22873e-06	0.000133058	3.98964
ENSG00000143319.12	0.425661	5.75736	5.91724	3.91593e-06	0.000111143	3.97381
ENSG00000138463.8	0.68844	4.83252	5.87537	4.34676e-06	0.000117931	3.96872
ENSG00000137309.15	0.833117	7.22971	5.93493	3.74713e-06	0.000108133	3.96194
ENSG00000196159.7	-1.17925	7.67729	-5.9364	3.73339e-06	0.000107918	3.96131
ENSG00000175591.7	2.47479	2.49407	5.72596	6.3171e-06	0.000150825	3.95296
ENSG00000168078.5	3.1478	0.648516	5.75215	5.91558e-06	0.00014354	3.93951
ENSG00000096063.10	1.03376	6.16099	5.91158	3.97149e-06	0.000112165	3.93861
ENSG00000139684.9	-0.814104	5.95714	-5.90611	4.02597e-06	0.000112968	3.9359
ENSG00000198604.6	0.706631	7.10029	5.92307	3.85947e-06	0.00011045	3.93427
ENSG00000137154.8	-0.897006	9.78373	-5.9266	3.82562e-06	0.000109846	3.9328
ENSG00000104870.8	-0.73891	6.73965	-5.91561	3.93181e-06	0.00011141	3.92393
ENSG00000048342.11	-1.02156	6.32567	-5.90059	4.08182e-06	0.000113771	3.9039
ENSG00000005100.8	0.889818	5.51668	5.87825	4.31567e-06	0.000117362	3.90165
ENSG00000164924.13	0.816238	8.04628	5.91301	3.95742e-06	0.000111952	3.89903
ENSG00000241322.4	1.96071	1.84765	5.69564	6.8165e-06	0.000159935	3.89432
ENSG00000119912.11	1.65366	6.7554	5.9	4.0878e-06	0.000113771	3.89322
ENSG00000020633.14	0.951023	5.36479	5.86736	4.43453e-06	0.000119746	3.89028
ENSG00000075275.12	1.72911	6.86015	5.89869	4.10117e-06	0.00011396	3.88664
ENSG00000198074.5	5.20022	0.292414	5.80206	5.22057e-06	0.000133047	3.88125
ENSG00000254772.5	-0.668649	9.99269	-5.90554	4.03173e-06	0.000112968	3.88052
ENSG00000058085.10	2.79216	4.83553	5.79659	5.29256e-06	0.000133695	3.87897
ENSG00000136603.9	0.62189	6.4007	5.89311	4.15863e-06	0.000115174	3.87702
ENSG00000150782.7	2.64219	3.62248	5.73379	6.19419e-06	0.000148213	3.87433
ENSG00000178999.8	2.10459	1.93572	5.68704	6.96542e-06	0.000161725	3.87382
ENSG00000127334.10	0.527209	5.80848	5.879	4.30755e-06	0.000117362	3.87284
ENSG00000197106.6	3.53833	2.98816	5.69038	6.90727e-06	0.000160809	3.8628
ENSG00000170430.9	-0.854838	3.6372	-5.75345	5.89625e-06	0.000143273	3.8573
ENSG00000013810.14	1.27983	4.28358	5.78883	5.39625e-06	0.000134539	3.85661
ENSG00000128872.5	-1.03233	4.37607	-5.79767	5.27825e-06	0.000133637	3.84881
ENSG00000095951.12	0.647454	7.61352	5.89041	4.1867e-06	0.000115221	3.84507
ENSG00000136866.9	-1.03874	2.95933	-5.70245	6.70094e-06	0.000158142	3.83461
ENSG00000131015.4	3.04001	-1.15944	5.90544	4.0327e-06	0.000112968	3.83438
ENSG00000011465.12	-1.53112	9.07365	-5.88284	4.2665e-06	0.000116672	3.82269
ENSG00000169258.6	1.93304	3.06447	5.69173	6.88387e-06	0.000160481	3.81445
ENSG00000123349.9	-0.676478	6.99392	-5.87365	4.36542e-06	0.000118251	3.81248
ENSG00000001084.6	0.700747	5.38982	5.83812	4.77041e-06	0.000125665	3.80862
ENSG00000069812.7	2.90645	-0.664112	5.80746	5.15054e-06	0.000131652	3.79593
ENSG00000068489.8	1.70928	2.57591	5.66271	7.40454e-06	0.000169861	3.78836
ENSG00000168077.9	-1.58064	5.66546	-5.82977	4.871e-06	0.000127341	3.78269
ENSG00000130304.12	-0.91541	5.60781	-5.83175	4.84704e-06	0.000126907	3.77624
ENSG00000226145.3	4.42966	0.124661	5.73813	6.1272e-06	0.000147635	3.77147
ENSG00000111077.13	-0.976596	7.43989	-5.85881	4.53023e-06	0.000121568	3.76857
ENSG00000140526.12	1.21115	6.82996	5.85297	4.59679e-06	0.000122755	3.76633
ENSG00000253250.2	-1.09852	2.79067	-5.66556	7.35163e-06	0.000168872	3.76479
ENSG00000109854.9	1.00106	3.97526	5.73752	6.13655e-06	0.000147654	3.76272
ENSG00000168874.8	-1.49607	2.81134	-5.66021	7.4513e-06	0.000170706	3.75894
ENSG00000130177.10	0.606872	6.82798	5.85088	4.6208e-06	0.000122851	3.75841
ENSG00000184575.7	0.495317	7.12544	5.85243	4.60296e-06	0.000122755	3.75626
ENSG00000147509.9	2.10775	3.10075	5.66662	7.33204e-06	0.000168872	3.75344
ENSG00000205517.8	-1.48044	3.95483	-5.72572	6.32085e-06	0.000150825	3.74828
ENSG00000224940.4	-2.00479	1.87861	-5.63298	7.97949e-06	0.000178547	3.7455
ENSG00000183347.13	4.60559	1.45849	5.64559	7.73029e-06	0.000174316	3.74027
ENSG00000103415.7	0.609659	5.02697	5.7957	5.30431e-06	0.000133796	3.73989
ENSG00000113594.5	-1.48766	5.92677	-5.81817	5.01443e-06	0.000129628	3.73632
ENSG00000120341.14	-0.914363	3.80092	-5.71486	6.49553e-06	0.000154139	3.73631
ENSG00000106034.13	-1.60108	5.20349	-5.7905	5.37374e-06	0.000134299	3.73307
ENSG00000072571.15	2.4623	1.41487	5.63088	8.02179e-06	0.000178772	3.72746
ENSG00000119686.5	1.39687	2.85226	5.64926	7.65916e-06	0.000173165	3.72523
ENSG00000076356.6	1.07091	6.04175	5.82337	4.94957e-06	0.000128855	3.72466
ENSG00000035499.8	2.45095	1.29808	5.63243	7.99047e-06	0.000178547	3.72377
ENSG00000100842.8	-1.17569	5.76645	-5.81384	5.06899e-06	0.000130147	3.72305
ENSG00000127152.13	1.42821	4.56707	5.75031	5.94283e-06	0.000143999	3.72117
ENSG00000126233.1	7.83791	0.132105	5.7931	5.33899e-06	0.000133987	3.71956
ENSG00000184635.9	0.920875	3.44617	5.68318	7.03328e-06	0.000163081	3.71682
ENSG00000143476.13	2.14798	2.55099	5.62836	8.07268e-06	0.000179236	3.7111
ENSG00000262601.1	-1.4167	1.964	-5.61817	8.28248e-06	0.000182003	3.70744
ENSG00000239492.2	4.13675	-1.63293	5.88793	4.21266e-06	0.000115751	3.70398
ENSG00000166396.8	8.38052	1.42279	5.77019	5.65405e-06	0.000139154	3.7036
ENSG00000171517.5	2.84743	1.35545	5.61904	8.26449e-06	0.000182003	3.70338
ENSG00000182195.6	-1.07801	3.14758	-5.65751	7.50206e-06	0.00017096	3.70173
ENSG00000151715.3	4.83644	1.53817	5.63594	7.9203e-06	0.000178134	3.70171
ENSG00000116489.8	0.64422	6.33474	5.82048	4.98552e-06	0.000129353	3.6991
ENSG00000167644.7	3.2021	2.07456	5.61367	8.37682e-06	0.000183375	3.6982
ENSG00000198944.4	-3.39672	-0.946404	-5.81663	5.03373e-06	0.000129628	3.69674
ENSG00000101003.8	1.69428	1.01471	5.62488	8.14385e-06	0.000180106	3.6941
ENSG00000148841.11	1.09376	5.42764	5.79012	5.37883e-06	0.000134299	3.69393
ENSG00000165244.6	1.55391	1.61165	5.60922	8.47132e-06	0.000185208	3.68865
ENSG00000163873.5	-4.65379	2.45406	-5.60849	8.48682e-06	0.000185312	3.68775
ENSG00000173068.13	-1.20008	6.9484	-5.82226	4.96339e-06	0.000128973	3.6874
ENSG00000185697.12	1.09484	3.06268	5.64417	7.75796e-06	0.000174711	3.68325
ENSG00000105141.4	5.9424	4.32795	5.62208	8.20142e-06	0.000180914	3.68214
ENSG00000198146.4	0.689644	7.27088	5.82323	4.95135e-06	0.000128855	3.6809
ENSG00000196526.6	-0.729201	4.99288	-5.76376	5.74588e-06	0.000140811	3.66403
ENSG00000089009.11	-0.730548	9.41327	-5.81899	5.00412e-06	0.000129628	3.66243
ENSG00000181982.13	-0.935601	4.24624	-5.71666	6.46618e-06	0.000153954	3.66175
ENSG00000107186.12	-0.781344	7.50153	-5.81288	5.08119e-06	0.000130266	3.65228
ENSG00000097096.8	-1.4517	4.82784	-5.7367	6.1491e-06	0.00014775	3.65171
ENSG00000166535.15	4.50022	4.75105	5.65603	7.53003e-06	0.000171144	3.65125
ENSG00000136950.9	0.922238	3.80888	5.68231	7.04858e-06	0.000163216	3.64918
ENSG00000111667.9	0.531517	6.15135	5.79735	5.28249e-06	0.000133637	3.64832
ENSG00000198729.4	3.05905	2.1702	5.59132	8.86204e-06	0.000190368	3.64683
ENSG00000154764.5	3.7253	-1.16408	5.84199	4.72457e-06	0.000125031	3.64457
ENSG00000006555.6	2.77673	2.18806	5.59395	8.80354e-06	0.000189584	3.6445
ENSG00000154258.12	-1.86255	6.60114	-5.79224	5.35038e-06	0.000133987	3.63521
ENSG00000134352.15	-0.594155	8.41897	-5.80594	5.17016e-06	0.000131958	3.62931
ENSG00000120885.15	-1.64942	6.18299	-5.78296	5.4761e-06	0.000135744	3.62811
ENSG00000175550.3	0.568258	5.456	5.76918	5.66838e-06	0.000139308	3.62659
ENSG00000144320.9	0.706478	6.21238	5.7842	5.4592e-06	0.00013552	3.616
ENSG00000182611.3	2.36712	3.10466	5.60601	8.53996e-06	0.000185766	3.61531
ENSG00000124839.8	2.76345	1.39482	5.57987	9.12137e-06	0.000193472	3.61496
ENSG00000114867.15	0.539341	9.15301	5.79854	5.2667e-06	0.000133637	3.61076
ENSG00000033627.10	0.465327	7.07472	5.79221	5.35079e-06	0.000133987	3.60589
ENSG00000115806.8	0.58259	6.41149	5.78451	5.45492e-06	0.00013552	3.60555
ENSG00000165304.3	2.44075	2.54125	5.5795	9.13004e-06	0.000193472	3.59827
ENSG00000134250.13	-0.463668	9.51853	-5.79257	5.34607e-06	0.000133987	3.59623
ENSG00000198948.7	-1.2532	5.84463	-5.76183	5.77377e-06	0.000141093	3.58635
ENSG00000099625.8	1.45811	2.36083	5.57492	9.23594e-06	0.000194996	3.58576
ENSG00000231584.4	-1.87649	4.61907	-5.69569	6.8157e-06	0.000159935	3.58205
ENSG00000183735.5	0.471037	5.62387	5.75677	5.84739e-06	0.000142286	3.58055
ENSG00000160949.12	0.916056	3.92854	5.65905	7.47293e-06	0.000170747	3.57977
ENSG00000155970.7	-0.985831	3.28915	-5.61824	8.281e-06	0.000182003	3.57973
ENSG00000129244.4	-1.86965	2.91864	-5.59275	8.83023e-06	0.000189922	3.57646
ENSG00000160877.5	0.919568	4.69201	5.70995	6.57606e-06	0.000155621	3.57469
ENSG00000159527.3	4.40415	1.92836	5.56142	9.55574e-06	0.000198533	3.57158
ENSG00000168913.6	-1.76453	0.598822	-5.58635	8.9736e-06	0.000192046	3.56944
ENSG00000175063.12	2.61128	2.25399	5.56009	9.58785e-06	0.000198533	3.56793
ENSG00000091136.9	-0.760536	8.57748	-5.7803	5.51274e-06	0.00013626	3.56485
ENSG00000176890.11	1.441	4.11185	5.65959	7.46288e-06	0.000170744	3.55946
ENSG00000137193.9	1.27044	4.51461	5.68722	6.96227e-06	0.000161725	3.55893
ENSG00000198223.10	1.33849	4.07335	5.65662	7.51871e-06	0.000171113	3.5534
ENSG00000111199.6	1.99405	3.2722	5.59818	8.71007e-06	0.000188514	3.55226
ENSG00000143320.4	1.87852	5.23766	5.71595	6.47771e-06	0.000153954	3.54911
ENSG00000102007.6	0.956783	6.26724	5.75698	5.84432e-06	0.000142286	3.54632
ENSG00000006625.13	1.39855	4.89938	5.7016	6.71534e-06	0.000158265	3.54492
ENSG00000175215.5	-0.576108	6.4891	-5.76057	5.792e-06	0.000141338	3.54175
ENSG00000151687.10	-0.923056	4.82228	-5.70052	6.73348e-06	0.000158476	3.53563
ENSG00000106809.6	-3.78101	2.35549	-5.54357	9.99607e-06	0.000205134	3.53306
ENSG00000184867.9	-1.13564	4.69166	-5.692	6.87914e-06	0.000160481	3.53246
ENSG00000158055.11	4.5317	2.79361	5.54334	1.00019e-05	0.000205134	3.52301
ENSG00000121742.11	3.41502	4.14219	5.59516	8.77675e-06	0.000189481	3.51665
ENSG00000005884.13	1.67994	6.07424	5.7361	6.15838e-06	0.000147767	3.51394
ENSG00000179148.5	5.0974	1.63624	5.54716	9.90585e-06	0.000203649	3.5117
ENSG00000152128.13	6.18689	0.237603	5.66596	7.34434e-06	0.000168872	3.51158
ENSG00000198901.9	1.43026	4.04369	5.63347	7.96955e-06	0.000178547	3.51023
ENSG00000148735.10	3.55736	-1.93578	5.81664	5.03364e-06	0.000129628	3.49968
ENSG00000169035.7	5.93089	3.72505	5.53359	1.02508e-05	0.000209243	3.49924
ENSG00000151474.15	0.880718	7.00334	5.74527	6.0185e-06	0.00014522	3.49115
ENSG00000134253.5	-0.983667	3.42214	-5.58752	8.94738e-06	0.000191723	3.48656
ENSG00000174405.9	0.945073	5.1583	5.69525	6.82332e-06	0.000159935	3.48248
ENSG00000053702.10	-2.49093	0.38791	-5.56119	9.56134e-06	0.000198533	3.48188
ENSG00000137804.8	2.25059	3.52319	5.56912	9.37212e-06	0.000196906	3.47026
ENSG00000196666.3	-1.99648	1.35223	-5.51575	1.07233e-05	0.000213838	3.46408
ENSG00000102921.3	0.509197	7.14441	5.73476	6.17917e-06	0.000148059	3.46022
ENSG00000171962.13	-1.28004	1.63748	-5.51197	1.08261e-05	0.000215123	3.45865
ENSG00000174099.6	-1.18971	3.14555	-5.5585	9.62654e-06	0.000199095	3.45745
ENSG00000137440.3	4.60306	1.9993	5.51572	1.07242e-05	0.000213838	3.45685
ENSG00000169509.5	5.52982	1.56718	5.53095	1.03196e-05	0.000210148	3.45546
ENSG00000135643.4	-1.76107	1.01803	-5.5163	1.07084e-05	0.000213838	3.45095
ENSG00000143390.13	0.933246	5.63716	5.70339	6.68514e-06	0.000157986	3.44999
ENSG00000160957.8	1.02784	3.35032	5.5676	9.40804e-06	0.000197361	3.44969
ENSG00000123219.8	1.52856	1.67524	5.5067	1.09711e-05	0.000217753	3.44594
ENSG00000140718.14	-0.480193	6.07058	-5.71015	6.57274e-06	0.000155621	3.43477
ENSG00000121753.8	1.38998	2.70517	5.52151	1.05685e-05	0.000212703	3.42654
ENSG00000183479.8	2.52677	2.27137	5.50537	1.10082e-05	0.000218239	3.42214
ENSG00000204020.5	6.46695	-0.051056	5.65825	7.48799e-06	0.000170865	3.41799
ENSG00000109625.14	-1.791	3.94615	-5.58357	9.03684e-06	0.000192682	3.41557
ENSG00000143412.5	3.93022	0.723912	5.52423	1.04959e-05	0.000211738	3.41369
ENSG00000198092.5	4.15089	0.750829	5.52735	1.04137e-05	0.000211525	3.41129
ENSG00000030582.12	0.883244	7.81802	5.71588	6.4788e-06	0.000153954	3.4055
ENSG00000121152.5	2.08757	2.30633	5.49507	1.12982e-05	0.000222453	3.40537
ENSG00000138356.9	-1.92974	5.20381	-5.65143	7.61753e-06	0.000172677	3.40313
ENSG00000117408.6	0.489025	5.29739	5.67207	7.23241e-06	0.000167024	3.3991
ENSG00000165794.5	2.86073	1.66642	5.48394	1.16208e-05	0.000226987	3.3898
ENSG00000151014.4	1.53708	3.20787	5.52696	1.0424e-05	0.000211525	3.38724
ENSG00000124882.3	4.57406	-0.111758	5.58419	9.02258e-06	0.000192616	3.36914
ENSG00000165072.9	-2.03354	4.23947	-5.57727	9.18143e-06	0.000194102	3.36514
ENSG00000215114.3	0.87106	4.1918	5.58957	8.90124e-06	0.000190972	3.3609
ENSG00000117543.15	-0.911298	3.8397	-5.56479	9.4749e-06	0.000198099	3.35747
ENSG00000105854.8	0.636696	5.98552	5.67658	7.15086e-06	0.000165363	3.35533
ENSG00000162878.8	-2.61302	2.35012	-5.47256	1.19599e-05	0.000231252	3.353
ENSG00000103351.8	-0.498912	4.25286	-5.59437	8.79418e-06	0.000189584	3.34912
ENSG00000147255.13	-3.51486	0.438814	-5.50486	1.10222e-05	0.000218265	3.34897
ENSG00000174748.14	-0.848125	10.3122	-5.69341	6.85485e-06	0.000160318	3.34877
ENSG00000171476.17	3.9288	3.59406	5.49698	1.1244e-05	0.000221638	3.33889
ENSG00000154556.13	-1.68631	5.67792	-5.65246	7.59794e-06	0.00017246	3.33178
ENSG00000188070.8	-1.02132	3.29559	-5.51661	1.06999e-05	0.000213838	3.32258
ENSG00000165799.4	5.64256	0.952131	5.50349	1.10606e-05	0.000218774	3.31666
ENSG00000106392.6	0.768609	4.75984	5.60616	8.5368e-06	0.000185766	3.30689
ENSG00000166091.15	-2.19978	2.12831	-5.45373	1.25435e-05	0.00023874	3.30383
ENSG00000158321.11	-0.920953	7.15961	-5.66801	7.30662e-06	0.000168512	3.29297
ENSG00000147676.9	3.94059	3.65174	5.4614	1.23024e-05	0.000235757	3.27232
ENSG00000116514.12	0.779468	6.21171	5.64799	7.6837e-06	0.000173492	3.27226
ENSG00000128591.11	-1.97997	4.76382	-5.57723	9.18233e-06	0.000194102	3.27182
ENSG00000164588.4	-4.14272	3.58559	-5.46221	1.22771e-05	0.000235535	3.26754
ENSG00000111262.4	-3.77507	-1.83456	-5.69321	6.85826e-06	0.000160318	3.26641
ENSG00000186844.4	5.92935	0.150108	5.55758	9.64894e-06	0.000199319	3.26013
ENSG00000070540.8	0.987752	5.69856	5.62829	8.07425e-06	0.000179236	3.25543
ENSG00000131037.10	2.21403	4.7401	5.56135	9.55762e-06	0.000198533	3.25466
ENSG00000171848.9	2.59278	2.83715	5.45533	1.24927e-05	0.000238344	3.2534
ENSG00000144199.7	-1.38648	4.64853	-5.57342	9.27088e-06	0.000195494	3.25016
ENSG00000087586.13	1.81037	2.08533	5.42759	1.34012e-05	0.000250408	3.24961
ENSG00000132003.5	0.86296	4.48285	5.57045	9.34056e-06	0.000196483	3.24936
ENSG00000164251.4	2.87883	2.84473	5.43893	1.30221e-05	0.000245186	3.24799
ENSG00000166851.10	1.7344	3.02474	5.46074	1.23228e-05	0.000235885	3.24497
ENSG00000087842.6	-1.36594	6.02445	-5.62782	8.08373e-06	0.000179236	3.24164
ENSG00000149503.8	0.807619	5.23231	5.60416	8.57998e-06	0.000186166	3.23808
ENSG00000050426.11	-0.734963	5.87877	-5.62563	8.1285e-06	0.000179997	3.23619
ENSG00000156976.10	-0.643497	8.88883	-5.64973	7.65022e-06	0.000173165	3.236
ENSG00000167207.7	1.88208	4.25707	5.52467	1.04845e-05	0.000211738	3.22798
ENSG00000024526.12	2.97177	1.36294	5.40929	1.40371e-05	0.000258614	3.21023
ENSG00000163781.8	0.485802	6.83157	5.63276	7.98384e-06	0.000178547	3.20935
ENSG00000124171.4	1.28355	4.18296	5.5223	1.05473e-05	0.000212525	3.20875
ENSG00000187068.2	-1.11607	4.06486	-5.51433	1.07619e-05	0.000214094	3.19872
ENSG00000159166.9	3.27334	4.94042	5.52038	1.05986e-05	0.00021306	3.19871
ENSG00000166963.8	-1.28202	6.57902	-5.62323	8.17765e-06	0.000180621	3.19817
ENSG00000139988.5	2.60863	2.42562	5.40857	1.40627e-05	0.000258614	3.19755
ENSG00000163565.14	0.567412	8.3782	5.63384	7.9622e-06	0.000178547	3.19596
ENSG00000144891.13	-1.91199	1.99191	-5.40231	1.42874e-05	0.000261837	3.19294
ENSG00000146904.4	2.85458	3.65692	5.44997	1.26631e-05	0.000239737	3.18905
ENSG00000130881.9	-0.802129	4.77732	-5.56013	9.58703e-06	0.000198533	3.1888
ENSG00000189334.4	3.44254	4.2882	5.46817	1.20935e-05	0.000233244	3.18877
ENSG00000169851.11	-1.32135	9.3762	-5.63039	8.03168e-06	0.000178772	3.188
ENSG00000197111.11	-0.572866	8.74931	-5.63057	8.02793e-06	0.000178772	3.18761
ENSG00000121211.3	1.9244	-0.1873	5.45301	1.25662e-05	0.00023874	3.18587
ENSG00000266865.2	-1.39591	0.723249	-5.40849	1.40656e-05	0.000258614	3.18197
ENSG00000103510.15	-0.506896	5.25959	-5.58423	9.02174e-06	0.000192616	3.18122
ENSG00000131187.5	2.59808	0.0421426	5.4471	1.27556e-05	0.000240957	3.18096
ENSG00000257109.2	4.25076	-0.286175	5.52938	1.03605e-05	0.000210732	3.17982
ENSG00000227184.3	3.18953	6.14906	5.58249	9.06133e-06	0.000192965	3.17254
ENSG00000135604.9	1.56011	2.26748	5.40111	1.4331e-05	0.000262097	3.17174
ENSG00000153310.14	0.852239	5.33551	5.58098	9.09602e-06	0.000193464	3.16954
ENSG00000149418.6	2.24437	5.17594	5.54831	9.87715e-06	0.000203545	3.16264
ENSG00000147394.14	1.65951	4.23671	5.50109	1.11278e-05	0.000219852	3.15792
ENSG00000168234.8	0.902446	5.09664	5.5641	9.4915e-06	0.000198206	3.15764
ENSG00000184588.13	1.32929	4.87203	5.54219	1.00309e-05	0.000205484	3.14746
ENSG00000145362.12	-1.0321	8.45049	-5.61389	8.37236e-06	0.000183375	3.14605
ENSG00000063046.13	-0.877673	9.41116	-5.61379	8.3743e-06	0.000183375	3.14589
ENSG00000074211.9	4.04987	2.69096	5.38726	1.48427e-05	0.000268604	3.14159
ENSG00000172005.6	-1.66415	4.62836	-5.5193	1.06275e-05	0.000213232	3.14097
ENSG00000167491.13	0.565254	6.73716	5.60431	8.57661e-06	0.000186166	3.14041
ENSG00000175634.10	0.768615	5.40673	5.5717	9.31135e-06	0.000196107	3.13824
ENSG00000198597.4	-2.97438	1.2702	-5.37874	1.5167e-05	0.00027167	3.13434
ENSG00000183092.11	-1.62875	2.14846	-5.38264	1.50178e-05	0.000269789	3.13414
ENSG00000186871.5	2.09372	1.2493	5.37755	1.52129e-05	0.000271876	3.13331
ENSG00000140534.9	1.95742	3.02493	5.40979	1.40194e-05	0.000258614	3.13236
ENSG00000197459.2	1.96303	3.47442	5.43297	1.32201e-05	0.000248371	3.12896
ENSG00000204628.7	-0.767812	9.52999	-5.6068	8.52299e-06	0.000185766	3.12837
ENSG00000171490.8	-0.835619	7.46147	-5.60321	8.60045e-06	0.000186376	3.12509
ENSG00000165501.12	0.778674	3.55186	5.45293	1.25689e-05	0.00023874	3.12105
ENSG00000172264.12	-1.65328	3.20652	-5.4173	1.37552e-05	0.000254811	3.12091
ENSG00000075240.12	0.895362	7.04738	5.59718	8.73207e-06	0.000188753	3.11654
ENSG00000009694.9	-1.93974	5.00952	-5.52531	1.04674e-05	0.000211738	3.11122
ENSG00000162366.3	4.39232	1.46047	5.37279	1.53973e-05	0.000274887	3.09748
ENSG00000129810.10	2.35577	1.91512	5.35837	1.5971e-05	0.000281914	3.08369
ENSG00000180543.3	-1.62308	3.59618	-5.42516	1.3484e-05	0.000250867	3.08132
ENSG00000105711.6	-2.19822	3.10668	-5.39454	1.45715e-05	0.000265399	3.08065
ENSG00000235942.2	6.0707	0.354333	5.4512	1.26239e-05	0.000239521	3.07461
ENSG00000159423.12	0.910106	2.92452	5.39173	1.46758e-05	0.000266703	3.07297
ENSG00000133640.14	-1.61354	1.55304	-5.34731	1.64256e-05	0.000286439	3.06766
ENSG00000185010.9	-0.707874	4.17896	-5.47266	1.1957e-05	0.000231252	3.06323
ENSG00000130695.9	0.778627	4.29286	5.47968	1.17465e-05	0.00022815	3.06284
ENSG00000063177.8	-0.865527	8.59308	-5.57985	9.12186e-06	0.000193472	3.05981
ENSG00000133800.4	-2.25241	3.13392	-5.38382	1.49729e-05	0.000269766	3.05045
ENSG00000052723.7	0.459608	4.01445	5.4583	1.23992e-05	0.000237084	3.05016
ENSG00000160588.5	2.43093	2.87355	5.36339	1.57689e-05	0.000279206	3.04987
ENSG00000016602.8	4.3702	1.37876	5.34715	1.6432e-05	0.000286439	3.04934
ENSG00000205413.3	1.22943	6.48458	5.5629	9.52012e-06	0.000198533	3.04861
ENSG00000172548.10	3.67321	3.00141	5.35137	1.62574e-05	0.000284637	3.0434
ENSG00000180537.8	3.74985	0.639394	5.3543	1.61368e-05	0.000283678	3.03146
ENSG00000142192.16	-0.737624	8.85176	-5.56724	9.41668e-06	0.000197361	3.02774
ENSG00000170889.9	-0.803477	8.47987	-5.5662	9.44137e-06	0.000197638	3.02536
ENSG00000160360.7	-0.997417	5.72467	-5.53518	1.02098e-05	0.000208653	3.02191
ENSG00000137807.9	2.16543	3.71597	5.41762	1.3744e-05	0.000254811	3.02027
ENSG00000206075.9	3.76241	4.9901	5.43301	1.32187e-05	0.000248371	3.01693
ENSG00000114115.5	2.61677	2.06366	5.33108	1.71164e-05	0.000293123	3.01385
ENSG00000204538.3	5.03257	0.443674	5.39037	1.47264e-05	0.000267033	3.01051
ENSG00000198755.6	-0.804516	8.89136	-5.56015	9.5864e-06	0.000198533	3.00986
ENSG00000107560.6	-0.647838	5.88342	-5.53641	1.01782e-05	0.000208255	3.00891
ENSG00000070010.14	0.736934	6.41008	5.54765	9.89352e-06	0.000203639	3.00889
ENSG00000158435.3	0.513899	5.53163	5.52519	1.04706e-05	0.000211738	3.00813
ENSG00000151012.9	3.46808	1.73559	5.31705	1.7737e-05	0.000298799	2.99434
ENSG00000115221.6	3.27156	1.73508	5.316	1.77841e-05	0.000298912	2.99314
ENSG00000147403.12	-0.75741	9.51833	-5.55019	9.83032e-06	0.000202823	2.98527
ENSG00000254154.4	-1.07489	2.9417	-5.35638	1.6052e-05	0.000282476	2.98482
ENSG00000164066.8	-1.04558	4.93251	-5.48631	1.15512e-05	0.000226268	2.98433
ENSG00000105880.4	2.89349	1.22403	5.31349	1.78981e-05	0.00030031	2.98233
ENSG00000164181.9	2.68457	3.10582	5.34578	1.64895e-05	0.000286756	2.97975
ENSG00000120963.7	0.530112	5.69996	5.51914	1.06319e-05	0.000213232	2.97875
ENSG00000122756.10	-3.34761	1.78797	-5.30453	1.83098e-05	0.000305364	2.96557
ENSG00000259571.1	-1.858	0.853536	-5.31178	1.7976e-05	0.000301256	2.96481
ENSG00000170089.11	1.15151	2.37549	5.322	1.75155e-05	0.00029704	2.96394
ENSG00000104267.5	2.3702	3.96998	5.38663	1.48665e-05	0.000268751	2.95928
ENSG00000105852.6	-1.82144	2.5926	-5.32191	1.75193e-05	0.00029704	2.95708
ENSG00000197181.7	-1.14824	1.65327	-5.30011	1.85168e-05	0.00030672	2.95323
ENSG00000047249.12	0.612027	5.28066	5.49302	1.1357e-05	0.000223355	2.94994
ENSG00000164615.3	-0.900093	5.1712	-5.48331	1.16394e-05	0.000227082	2.94685
ENSG00000204217.8	0.576014	7.8772	5.53163	1.03019e-05	0.000210037	2.93946
ENSG00000196734.6	6.57945	0.866493	5.36683	1.56321e-05	0.000277856	2.9387
ENSG00000168476.7	1.0947	3.79536	5.39094	1.4705e-05	0.000266953	2.92879
ENSG00000166900.10	0.596414	7.41456	5.52493	1.04776e-05	0.000211738	2.92695
ENSG00000112029.5	0.977438	3.74244	5.38329	1.4993e-05	0.000269766	2.92676
ENSG00000010319.2	-2.17071	3.10317	-5.33184	1.70832e-05	0.000293123	2.92622
ENSG00000169474.3	6.75477	3.23228	5.28642	1.91723e-05	0.000313377	2.92302
ENSG00000119638.8	-0.487808	6.88061	-5.51847	1.06498e-05	0.000213343	2.91972
ENSG00000183111.7	-1.30278	5.5457	-5.4851	1.15866e-05	0.000226577	2.91915
ENSG00000174628.12	-0.759939	3.29677	-5.35175	1.62414e-05	0.000284637	2.91838
ENSG00000135835.6	-1.17461	5.03851	-5.46413	1.22177e-05	0.000234656	2.9174
ENSG00000166986.8	0.479225	6.67	5.51511	1.07405e-05	0.000213916	2.91646
ENSG00000165028.7	-1.36181	1.35261	-5.28056	1.94599e-05	0.000315683	2.90901
ENSG00000075218.14	2.16299	2.40704	5.28994	1.90012e-05	0.000311468	2.90302
ENSG00000140090.13	4.05213	2.54527	5.28411	1.92848e-05	0.000313982	2.90156
ENSG00000103534.12	4.86743	0.309713	5.33898	1.67765e-05	0.000289895	2.89382
ENSG00000113328.14	-0.828579	6.34536	-5.49867	1.11961e-05	0.000220947	2.88992
ENSG00000144136.6	0.95742	5.96292	5.49054	1.14284e-05	0.000224502	2.88843
ENSG00000018625.10	-3.14218	1.97234	-5.27076	1.99506e-05	0.000322732	2.88242
ENSG00000178184.11	1.13087	4.4476	5.41128	1.39664e-05	0.000258169	2.8798
ENSG00000173662.15	-2.50946	-0.250612	-5.33249	1.70551e-05	0.000292946	2.86917
ENSG00000186314.7	-1.43403	3.48805	-5.33579	1.69126e-05	0.00029137	2.86096
ENSG00000101280.6	-2.49537	-0.904049	-5.37867	1.51699e-05	0.00027167	2.85402
ENSG00000106069.16	1.68968	4.07434	5.36204	1.58232e-05	0.000279592	2.84846
ENSG00000241399.2	-0.952991	4.8611	-5.42837	1.3375e-05	0.000250189	2.84807
ENSG00000116871.11	0.632254	6.74837	5.48651	1.15455e-05	0.000226268	2.8424
ENSG00000093000.14	0.494384	6.14005	5.47613	1.18526e-05	0.00022986	2.84016
ENSG00000170465.9	6.40978	4.04724	5.26362	2.0316e-05	0.00032772	2.83187
ENSG00000124006.10	-1.00796	6.946	-5.48288	1.1652e-05	0.000227082	2.83039
ENSG00000137216.14	0.785005	6.05632	5.4693	1.20588e-05	0.000232903	2.82986
ENSG00000111371.11	1.58045	5.20444	5.43051	1.33025e-05	0.000249424	2.82753
ENSG00000198947.10	-1.85234	8.44639	-5.48609	1.15577e-05	0.000226268	2.82471
ENSG00000134779.10	0.525754	6.97894	5.48159	1.169e-05	0.000227308	2.82433
ENSG00000162669.11	-1.76955	3.21188	-5.29667	1.86792e-05	0.000307702	2.8219
ENSG00000197961.7	0.517093	6.00815	5.46508	1.21883e-05	0.000234352	2.82003
ENSG00000204613.6	3.38444	-1.7389	5.46784	1.21035e-05	0.000233244	2.81697
ENSG00000197958.8	-0.763635	9.00239	-5.48225	1.16705e-05	0.000227186	2.81278
ENSG00000105011.4	2.32132	0.618876	5.24938	2.10651e-05	0.000336614	2.80864
ENSG00000073969.14	0.609837	5.74352	5.45298	1.25672e-05	0.00023874	2.80469
ENSG00000144031.7	-1.55215	2.04477	-5.24283	2.14192e-05	0.000340729	2.79787
ENSG00000186160.4	-3.38923	-1.25886	-5.4224	1.35785e-05	0.000252353	2.79736
ENSG00000162244.6	-0.736598	8.28142	-5.47584	1.18612e-05	0.00022986	2.79714
ENSG00000181061.9	0.897615	4.42652	5.38308	1.50009e-05	0.000269766	2.79637
ENSG00000129451.7	4.34468	1.85571	5.23239	2.19954e-05	0.000346061	2.79469
ENSG00000122733.11	-2.21418	1.72523	-5.23196	2.20195e-05	0.000346124	2.79179
ENSG00000161642.13	1.3738	5.2416	5.4196	1.36751e-05	0.000253874	2.79044
ENSG00000169860.4	1.41885	3.45949	5.30575	1.82531e-05	0.000304714	2.78908
ENSG00000112511.13	-0.637586	6.24244	-5.45684	1.24452e-05	0.0002377	2.78711
ENSG00000052850.5	-2.34951	0.628308	-5.23995	2.15763e-05	0.000342281	2.78139
ENSG00000137857.13	2.43677	6.25302	5.44091	1.29568e-05	0.000244491	2.78132
ENSG00000183605.12	-0.657559	3.75968	-5.33144	1.71008e-05	0.000293123	2.78007
ENSG00000164379.4	2.69744	0.631915	5.23901	2.16279e-05	0.000342783	2.77527
ENSG00000170423.8	6.61083	0.920218	5.28522	1.92305e-05	0.000313982	2.77294
ENSG00000197451.6	0.630076	6.06315	5.44745	1.27444e-05	0.000240957	2.77214
ENSG00000102531.12	-0.523743	7.88338	-5.46513	1.21868e-05	0.000234352	2.77119
ENSG00000182732.12	-3.26924	-0.644835	-5.32437	1.74101e-05	0.000296092	2.7701
ENSG00000118640.6	1.50502	4.81744	5.38601	1.48901e-05	0.000268837	2.7647
ENSG00000204160.7	0.737541	4.24559	5.35735	1.60125e-05	0.000282358	2.76241
ENSG00000148935.6	-3.83209	-0.288878	-5.29661	1.86822e-05	0.000307702	2.75947
ENSG00000184363.5	3.25997	4.94706	5.34688	1.64435e-05	0.000286439	2.75912
ENSG00000158786.4	4.97266	-0.159736	5.31749	1.77173e-05	0.000298799	2.75666
ENSG00000113368.7	1.2984	4.04694	5.33483	1.69543e-05	0.000291557	2.75433
ENSG00000122121.6	-2.10544	2.80386	-5.24581	2.12574e-05	0.000338782	2.74935
ENSG00000029993.10	1.51605	2.5052	5.23439	2.18839e-05	0.000345252	2.7486
ENSG00000115091.7	0.673557	7.05009	5.45076	1.26379e-05	0.000239521	2.74539
ENSG00000227471.4	3.41556	-1.38114	5.39394	1.45939e-05	0.000265495	2.73967
ENSG00000141527.12	2.94984	2.66004	5.23356	2.19303e-05	0.000345352	2.73769
ENSG00000141040.10	-0.582598	3.92514	-5.32519	1.73739e-05	0.00029606	2.73575
ENSG00000105707.9	-2.79527	1.6615	-5.20722	2.34504e-05	0.000361363	2.73361
ENSG00000152256.9	1.20966	4.08921	5.3297	1.71761e-05	0.00029327	2.72822
ENSG00000184661.9	2.68997	2.58388	5.22181	2.25957e-05	0.000352607	2.72645
ENSG00000118520.9	7.20753	2.04616	5.2293	2.21693e-05	0.000347528	2.72376
ENSG00000090376.4	-0.73601	4.9	-5.3822	1.50346e-05	0.000269808	2.72069
ENSG00000136653.15	1.19172	4.25941	5.33624	1.68935e-05	0.000291332	2.71757
ENSG00000114019.10	-0.843314	6.09304	-5.42519	1.34829e-05	0.000250867	2.71634
ENSG00000205726.9	-0.49013	7.12901	-5.43991	1.29898e-05	0.000244845	2.7159
ENSG00000087095.8	0.514629	4.95057	5.38568	1.49025e-05	0.000268837	2.71416
ENSG00000135632.7	-0.595149	4.37283	-5.34837	1.63815e-05	0.000286228	2.7139
ENSG00000162591.11	-1.05499	6.47629	-5.42673	1.34306e-05	0.000250685	2.70453
ENSG00000132698.9	3.39183	3.28901	5.22759	2.22658e-05	0.000348723	2.70347
ENSG00000140451.8	1.56268	1.8352	5.19754	2.40355e-05	0.000367747	2.70329
ENSG00000095383.15	1.08282	4.19506	5.33053	1.71402e-05	0.000293239	2.7023
ENSG00000172478.13	3.68147	1.82116	5.1926	2.43402e-05	0.000369538	2.70016
ENSG00000109066.9	0.707624	5.54658	5.4031	1.42589e-05	0.000261611	2.69845
ENSG00000142945.8	2.0334	2.24799	5.20271	2.37212e-05	0.000364232	2.69432
ENSG00000164520.7	3.81386	1.07719	5.20282	2.37149e-05	0.000364232	2.69381
ENSG00000134046.7	0.451654	6.60792	5.42553	1.34714e-05	0.000250867	2.69184
ENSG00000130032.11	-2.20069	0.12965	-5.22229	2.25682e-05	0.000352498	2.6869
ENSG00000160796.12	1.02409	7.76702	5.42996	1.3321e-05	0.00024945	2.68401
ENSG00000116661.9	-2.17242	2.18836	-5.19856	2.39736e-05	0.000367126	2.6827
ENSG00000188522.10	2.50549	4.95788	5.33912	1.67705e-05	0.000289895	2.68217
ENSG00000142541.12	-0.753919	9.4035	-5.43044	1.33051e-05	0.000249424	2.68191
ENSG00000148572.10	0.633467	4.50636	5.34565	1.6495e-05	0.000286756	2.68173
ENSG00000154127.5	1.38924	3.94457	5.29862	1.85869e-05	0.00030672	2.67684
ENSG00000184307.9	1.67553	4.06893	5.29865	1.85856e-05	0.00030672	2.67513
ENSG00000164086.8	0.76255	5.45738	5.38999	1.47404e-05	0.000267033	2.67417
ENSG00000080986.8	2.58391	1.7952	5.18516	2.48058e-05	0.000375531	2.67382
ENSG00000163517.10	-0.963157	3.39778	-5.25833	2.05908e-05	0.000330357	2.67284
ENSG00000148798.5	4.54772	-1.81966	5.36426	1.57344e-05	0.000278881	2.66728
ENSG00000131153.4	1.07155	1.53382	5.17968	2.51544e-05	0.000379475	2.6672
ENSG00000005379.11	-1.11991	5.22307	-5.37034	1.54935e-05	0.000276031	2.65702
ENSG00000134207.10	3.82958	-0.915036	5.29153	1.89246e-05	0.000310508	2.65024
ENSG00000123388.4	2.64402	-0.678718	5.25826	2.05946e-05	0.000330357	2.64667
ENSG00000137054.11	-0.905561	4.95856	-5.35249	1.6211e-05	0.000284453	2.64652
ENSG00000067225.13	0.919041	8.34977	5.41595	1.38021e-05	0.000255406	2.64513
ENSG00000240771.2	-0.970322	4.72789	-5.34108	1.66871e-05	0.000289221	2.64077
ENSG00000103005.7	0.627569	4.34195	5.31898	1.76503e-05	0.000298409	2.64051
ENSG00000077274.7	-2.9502	0.861984	-5.17532	2.5435e-05	0.000383373	2.639
ENSG00000084207.11	0.82179	7.2421	5.40891	1.40505e-05	0.000258614	2.63621
ENSG00000185585.15	-1.12003	5.39139	-5.36989	1.5511e-05	0.000276058	2.636
ENSG00000110347.7	4.72761	-1.47698	5.33475	1.69573e-05	0.000291557	2.63458
ENSG00000173517.6	-0.723017	8.33421	-5.40612	1.41503e-05	0.000259895	2.62014
ENSG00000147434.4	2.52468	-0.31927	5.2135	2.30784e-05	0.000357789	2.61791
ENSG00000196407.7	5.65446	0.912937	5.19251	2.43456e-05	0.000369538	2.61553
ENSG00000165410.10	-0.945212	3.4444	-5.24126	2.15048e-05	0.00034146	2.61303
ENSG00000104131.8	0.489003	5.35286	5.36263	1.57996e-05	0.000279461	2.6125
ENSG00000031081.6	-0.665174	8.08584	-5.40192	1.43017e-05	0.000261837	2.61014
ENSG00000105894.7	-2.93781	4.95763	-5.29891	1.85734e-05	0.00030672	2.60929
ENSG00000196878.8	2.43102	4.86439	5.30147	1.84527e-05	0.000306288	2.6046
ENSG00000129270.11	1.71506	3.2279	5.20996	2.32874e-05	0.00035952	2.60286
ENSG00000250091.2	-1.21353	1.1272	-5.15173	2.70111e-05	0.000401854	2.60268
ENSG00000113712.12	0.540512	7.56558	5.3968	1.44885e-05	0.000264696	2.60056
ENSG00000165105.9	2.69737	2.41829	5.16282	2.62582e-05	0.000393713	2.59817
ENSG00000140262.13	-0.51233	7.36312	-5.39449	1.45732e-05	0.000265399	2.59707
ENSG00000163376.7	1.21985	1.71531	5.15104	2.70581e-05	0.000402206	2.59571
ENSG00000108242.8	4.56102	0.575564	5.19252	2.43451e-05	0.000369538	2.59413
ENSG00000114391.8	-0.789828	7.96123	-5.39509	1.45514e-05	0.000265399	2.59405
ENSG00000092036.12	-0.940685	4.43846	-5.30241	1.84088e-05	0.000306288	2.59253
ENSG00000112494.5	5.36256	0.491145	5.19305	2.43121e-05	0.000369538	2.58237
ENSG00000137747.10	3.02336	3.75103	5.20993	2.32891e-05	0.00035952	2.58224
ENSG00000173239.9	6.04327	0.508535	5.20939	2.33211e-05	0.000359692	2.57987
ENSG00000164403.10	-1.28305	4.5178	-5.29895	1.85715e-05	0.00030672	2.57712
ENSG00000177485.6	0.456069	6.10423	5.37121	1.54593e-05	0.000275707	2.57675
ENSG00000064195.7	3.30411	0.820481	5.14834	2.72453e-05	0.000403596	2.57606
ENSG00000101166.11	0.696107	4.5792	5.3067	1.82095e-05	0.00030428	2.57578
ENSG00000185267.5	-1.22869	0.961768	-5.14123	2.77434e-05	0.000408864	2.57403
ENSG00000109182.7	3.43524	3.46439	5.17075	2.57332e-05	0.000387527	2.55378
ENSG00000116675.11	1.25501	2.72536	5.16798	2.59152e-05	0.000389927	2.55233
ENSG00000149273.10	-0.78327	9.00942	-5.37781	1.52029e-05	0.000271876	2.54805
ENSG00000116191.13	0.858097	4.7263	5.30222	1.84178e-05	0.000306288	2.54738
ENSG00000010282.10	-5.43201	4.96687	-5.21208	2.31621e-05	0.000358201	2.54328
ENSG00000147324.6	0.809962	5.84557	5.34928	1.63437e-05	0.000285857	2.53851
ENSG00000163218.10	3.80159	1.09822	5.1285	2.8659e-05	0.000416308	2.53625
ENSG00000101447.9	2.56271	2.49098	5.13874	2.79199e-05	0.000410413	2.53579
ENSG00000125898.8	1.39905	3.27871	5.19576	2.41448e-05	0.000368112	2.53525
ENSG00000185436.7	2.01509	1.93877	5.13397	2.82615e-05	0.00041281	2.53403
ENSG00000132405.14	0.586026	6.91119	5.36652	1.56443e-05	0.000277856	2.53391
ENSG00000172987.8	-2.87098	4.1773	-5.21457	2.3016e-05	0.000357224	2.53011
ENSG00000197641.7	4.95897	3.01976	5.12849	2.86592e-05	0.000416308	2.52846
ENSG00000168118.7	0.605124	5.10101	5.31654	1.77601e-05	0.000298799	2.52758
ENSG00000180008.8	0.551789	5.58276	5.33752	1.68385e-05	0.000290675	2.52746
ENSG00000159131.12	0.471614	6.39906	5.35679	1.60352e-05	0.000282469	2.52558
ENSG00000168546.6	-1.33896	3.47689	-5.20147	2.37964e-05	0.000365062	2.52537
ENSG00000111664.6	-1.50439	0.979313	-5.11773	2.94567e-05	0.000425381	2.51853
ENSG00000131370.11	-0.71464	4.97551	-5.30772	1.81623e-05	0.000304082	2.51853
ENSG00000128524.4	0.665157	5.35593	5.32467	1.73968e-05	0.000296092	2.51768
ENSG00000164741.10	-1.23457	8.59154	-5.36483	1.57114e-05	0.00027876	2.51557
ENSG00000134775.11	1.33944	6.10462	5.34351	1.65845e-05	0.000287732	2.51367
ENSG00000115468.7	-2.56422	3.29402	-5.16606	2.60425e-05	0.0003915	2.50947
ENSG00000206579.7	-4.48396	1.68028	-5.11287	2.98236e-05	0.000427456	2.50681
ENSG00000106617.9	-0.562349	4.62658	-5.28379	1.93004e-05	0.000313982	2.50662
ENSG00000097021.15	1.09243	4.84351	5.292	1.89019e-05	0.000310445	2.5065
ENSG00000008300.10	1.07477	3.34051	5.18201	2.50053e-05	0.000377556	2.49448
ENSG00000153294.7	4.35339	2.12436	5.10671	3.02962e-05	0.00043243	2.49293
ENSG00000109101.3	3.74727	2.16215	5.10586	3.03623e-05	0.000432721	2.49037
ENSG00000198513.7	-0.689659	4.15244	-5.2438	2.13664e-05	0.000340203	2.4898
ENSG00000261879.1	-1.41511	2.07322	-5.11437	2.97098e-05	0.00042693	2.48726
ENSG00000130985.12	0.389646	8.52592	5.35242	1.62139e-05	0.000284453	2.48336
ENSG00000118217.5	0.391057	6.55691	5.34026	1.6722e-05	0.000289534	2.47697
ENSG00000185262.7	0.875586	4.47925	5.25892	2.056e-05	0.000330357	2.47646
ENSG00000167759.8	5.22563	1.85822	5.10135	3.07133e-05	0.000435855	2.47604
ENSG00000162889.6	0.56878	5.73877	5.32243	1.74964e-05	0.00029704	2.47497
ENSG00000166313.14	-0.640456	5.22538	-5.30156	1.84486e-05	0.000306288	2.4723
ENSG00000184271.11	-0.826417	3.63487	-5.19676	2.40836e-05	0.000368082	2.47185
ENSG00000253729.3	0.401321	9.59047	5.34408	1.65608e-05	0.000287611	2.46304
ENSG00000092421.12	1.51159	6.13555	5.31916	1.76423e-05	0.000298409	2.46169
ENSG00000118096.3	-0.548322	3.94902	-5.21873	2.27737e-05	0.000354422	2.4594
ENSG00000137486.12	-0.808691	5.78174	-5.3134	1.79021e-05	0.00030031	2.45463
ENSG00000104856.9	0.940817	4.02211	5.21764	2.28368e-05	0.000355084	2.45098
ENSG00000102221.9	0.946653	3.71355	5.19649	2.41001e-05	0.000368082	2.45095
ENSG00000144649.4	-1.77488	2.28752	-5.10371	3.0529e-05	0.000434313	2.44263
ENSG00000163288.9	-3.54095	-1.40655	-5.26236	2.03813e-05	0.000328464	2.43941
ENSG00000155254.8	-1.04346	3.71202	-5.18596	2.47549e-05	0.000375089	2.43503
ENSG00000182899.10	-0.80886	7.98864	-5.32981	1.71714e-05	0.00029327	2.42832
ENSG00000175166.12	0.494092	7.15274	5.32582	1.73463e-05	0.000295884	2.42551
ENSG00000081853.13	-1.83092	3.05805	-5.12486	2.89261e-05	0.000418772	2.42069
ENSG00000184898.6	-0.808271	4.35529	-5.23061	2.20954e-05	0.000346685	2.41885
ENSG00000165480.11	2.28231	1.9477	5.07716	3.26687e-05	0.000455347	2.41604
ENSG00000233224.1	1.68182	3.61813	5.15676	2.66668e-05	0.000398452	2.41203
ENSG00000150540.9	-1.12064	5.20493	-5.27022	1.9978e-05	0.000322872	2.41047
ENSG00000141098.8	0.740454	5.9509	5.30106	1.84719e-05	0.000306288	2.40946
ENSG00000132507.13	0.717611	7.17451	5.31801	1.76938e-05	0.000298799	2.40643
ENSG00000182621.12	-1.15496	4.7361	-5.24134	2.15001e-05	0.00034146	2.40523
ENSG00000197971.10	0.7559	8.78742	5.32156	1.75348e-05	0.00029704	2.40514
ENSG00000185633.6	2.3603	2.77599	5.11028	3.00216e-05	0.000429222	2.40309
ENSG00000196747.3	1.86316	3.57051	5.14903	2.71976e-05	0.000403236	2.40197
ENSG00000144635.4	0.509001	5.5014	5.28383	1.92986e-05	0.000313982	2.39751
ENSG00000174437.12	0.517518	9.38362	5.31666	1.77544e-05	0.000298799	2.39316
ENSG00000078237.4	1.40054	3.47827	5.14774	2.72869e-05	0.000403864	2.39138
ENSG00000100399.11	-2.50213	3.65506	-5.13522	2.8172e-05	0.00041281	2.38898
ENSG00000188971.4	0.699863	4.65429	5.238	2.16838e-05	0.000343224	2.38839
ENSG00000163162.4	0.746211	6.82842	5.30672	1.82085e-05	0.00030428	2.38559
ENSG00000197147.8	0.874734	5.83789	5.28873	1.90597e-05	0.000312129	2.38541
ENSG00000064270.8	5.42189	1.80893	5.06199	3.39589e-05	0.000465059	2.3849
ENSG00000196812.4	1.01527	2.62133	5.09538	3.11851e-05	0.000441459	2.38398
ENSG00000162735.14	-0.635841	4.51756	-5.22426	2.24553e-05	0.000351052	2.3778
ENSG00000167900.7	1.93092	1.62639	5.05828	3.42815e-05	0.00046836	2.3778
ENSG00000114738.6	0.801153	5.09505	5.25783	2.06171e-05	0.00033041	2.37766
ENSG00000116525.9	0.957046	3.48974	5.15023	2.71141e-05	0.000402691	2.37681
ENSG00000143995.15	-0.709083	4.25617	-5.20353	2.36716e-05	0.000364121	2.37222
ENSG00000101654.13	0.543178	6.86754	5.30137	1.84576e-05	0.000306288	2.36935
ENSG00000196866.2	1.36835	2.3921	5.07632	3.27392e-05	0.000455347	2.36918
ENSG00000197506.6	3.05455	2.49587	5.06664	3.35578e-05	0.000461862	2.36429
ENSG00000196374.5	1.9835	2.62496	5.07837	3.25685e-05	0.000455062	2.36042
ENSG00000100170.5	4.31763	1.99495	5.04899	3.51052e-05	0.000476257	2.35559
ENSG00000198925.6	0.42575	5.97991	5.28087	1.94441e-05	0.000315683	2.35443
ENSG00000253304.1	-1.28457	1.64794	-5.04895	3.51083e-05	0.000476257	2.34724
ENSG00000116984.8	-0.569711	7.40887	-5.29329	1.88402e-05	0.000310009	2.33959
ENSG00000178177.10	0.741626	6.10365	5.27649	1.96621e-05	0.000318662	2.33794
ENSG00000153560.7	0.364337	6.40746	5.28261	1.93586e-05	0.000314632	2.33604
ENSG00000104529.13	-0.654189	7.88007	-5.29199	1.89028e-05	0.000310445	2.3323
ENSG00000133816.9	1.51435	6.97845	5.28454	1.92637e-05	0.000313982	2.3309
ENSG00000198374.3	2.25807	2.78059	5.06855	3.3395e-05	0.000460263	2.32766
ENSG00000108379.5	3.09814	1.46997	5.03558	3.63273e-05	0.000484402	2.3272
ENSG00000162944.6	-1.26011	5.76936	-5.25946	2.0532e-05	0.000330357	2.32593
ENSG00000154124.4	0.44315	4.69647	5.2164	2.29088e-05	0.000355882	2.32351
ENSG00000134755.10	2.42373	5.91494	5.24827	2.11247e-05	0.000336978	2.32163
ENSG00000125998.7	3.98349	2.85216	5.04806	3.51879e-05	0.000476586	2.31969
ENSG00000108298.5	-0.667631	9.06137	-5.28755	1.91172e-05	0.000312775	2.31886
ENSG00000175785.8	-4.01362	-0.628278	-5.12578	2.88581e-05	0.000418772	2.31662
ENSG00000101966.8	0.412231	5.77316	5.25856	2.05789e-05	0.000330357	2.31042
ENSG00000108604.11	-0.371295	6.19684	-5.26568	2.02098e-05	0.000326312	2.30299
ENSG00000147364.12	0.546468	5.15431	5.23062	2.20947e-05	0.000346685	2.29932
ENSG00000198160.10	0.616975	6.95926	5.27404	1.97851e-05	0.000320355	2.29847
ENSG00000131242.11	0.741343	3.93909	5.15215	2.69822e-05	0.000401854	2.29512
ENSG00000188610.8	2.00504	-0.470163	5.07447	3.2894e-05	0.000456162	2.29372
ENSG00000105270.10	-1.03123	3.72449	-5.13346	2.82986e-05	0.00041281	2.29037
ENSG00000137558.3	2.31746	0.554836	5.02452	3.73691e-05	0.000494466	2.28535
ENSG00000124429.13	4.38096	4.18358	5.07867	3.25436e-05	0.000455062	2.28487
ENSG00000127720.3	-0.579344	4.19392	-5.16339	2.62202e-05	0.000393486	2.27809
ENSG00000138092.6	0.710119	4.07735	5.15174	2.70103e-05	0.000401854	2.27697
ENSG00000187151.3	-2.93014	1.32116	-5.0146	3.83273e-05	0.000504048	2.27628
ENSG00000123975.4	2.54498	1.38983	5.01382	3.84047e-05	0.00050468	2.27449
ENSG00000111678.6	-1.14333	5.78196	-5.23779	2.16955e-05	0.000343224	2.26811
ENSG00000187446.7	-0.925906	6.7804	-5.25718	2.06514e-05	0.000330653	2.2635
ENSG00000077616.6	-3.11479	2.754	-5.03004	3.68454e-05	0.000489039	2.25683
ENSG00000173890.12	1.79862	2.17735	5.01923	3.7877e-05	0.000498888	2.25601
ENSG00000136153.15	1.20346	5.92805	5.23703	2.17373e-05	0.00034357	2.25451
ENSG00000183230.12	-3.17194	-0.710731	-5.08524	3.20019e-05	0.000450046	2.25426
ENSG00000204421.2	4.73296	2.34974	5.00505	3.92744e-05	0.000511815	2.25275
ENSG00000110031.8	0.980071	4.37976	5.16535	2.60897e-05	0.000391868	2.25082
ENSG00000174840.8	0.502397	6.46385	5.24906	2.10823e-05	0.000336614	2.24895
ENSG00000139567.8	-1.09222	4.33088	-5.15625	2.67013e-05	0.000398622	2.24818
ENSG00000223547.5	-0.708527	4.89151	-5.19483	2.42019e-05	0.000368657	2.2471
ENSG00000157388.9	2.12126	3.4595	5.09013	3.16052e-05	0.000445577	2.24218
ENSG00000133106.10	1.7465	4.33344	5.14668	2.73606e-05	0.000404608	2.24137
ENSG00000184144.5	-3.79301	0.583568	-5.02127	3.76798e-05	0.000497495	2.24089
ENSG00000100290.2	3.04174	-1.35792	5.14417	2.7536e-05	0.000406853	2.23993
ENSG00000159433.7	-0.766438	8.16643	-5.25512	2.07598e-05	0.00033208	2.23721
ENSG00000161217.7	0.563976	5.56081	5.21908	2.27534e-05	0.000354422	2.2281
ENSG00000148600.10	4.05237	5.49149	5.13807	2.7968e-05	0.00041077	2.22405
ENSG00000169299.9	0.699132	5.72885	5.22091	2.26475e-05	0.000353097	2.22126
ENSG00000136267.9	-2.86997	-0.0675715	-5.0235	3.74663e-05	0.000495371	2.21888
ENSG00000184792.11	1.50902	2.95237	5.04289	3.56562e-05	0.000479535	2.21852
ENSG00000214160.5	0.735232	5.30209	5.19935	2.39251e-05	0.00036671	2.2083
ENSG00000089685.10	2.4426	1.00952	4.98513	4.13261e-05	0.000527383	2.20696
ENSG00000181722.11	-0.733175	6.84685	-5.23661	2.17606e-05	0.000343622	2.20695
ENSG00000197153.3	2.41749	1.74598	4.98621	4.12114e-05	0.000526956	2.20521
ENSG00000106105.9	0.59032	6.72164	5.23401	2.19051e-05	0.000345271	2.20272
ENSG00000123600.14	0.602367	4.3345	5.14157	2.77195e-05	0.000408863	2.19939
ENSG00000010017.9	0.546611	6.27206	5.22605	2.23534e-05	0.000349777	2.19918
ENSG00000163145.8	-2.36792	1.86795	-4.98271	4.15818e-05	0.00052883	2.19285
ENSG00000153944.6	0.641244	5.96446	5.21289	2.31147e-05	0.000357789	2.18329
ENSG00000065923.5	1.49555	3.71263	5.07451	3.28909e-05	0.000456162	2.18117
ENSG00000023572.4	0.662726	3.15469	5.04575	3.53964e-05	0.000477193	2.17747
ENSG00000124749.12	-1.98188	4.01925	-5.08416	3.20903e-05	0.000450571	2.17172
ENSG00000245293.2	-3.13222	-0.648721	-5.05046	3.49731e-05	0.000475546	2.17069
ENSG00000006007.7	0.732201	5.37296	5.1872	2.46771e-05	0.00037424	2.16768
ENSG00000160460.11	-1.58862	2.18029	-4.98548	4.12892e-05	0.000527302	2.16501
ENSG00000131233.8	3.55366	-1.37636	5.1187	2.9384e-05	0.000424688	2.16188
ENSG00000177932.6	-0.532296	4.52071	-5.14052	2.77939e-05	0.00040891	2.15949
ENSG00000135930.9	0.406065	5.80382	5.19593	2.41344e-05	0.000368112	2.1495
ENSG00000185112.4	0.973148	3.33647	5.04239	3.57018e-05	0.000479774	2.14914
ENSG00000110675.8	5.88702	0.572865	5.00744	3.90351e-05	0.000510241	2.14911
ENSG00000156509.9	1.94495	0.640933	4.96188	4.38563e-05	0.000550296	2.14635
ENSG00000063854.8	0.725093	4.08809	5.10577	3.03689e-05	0.000432721	2.14545
ENSG00000077279.12	-4.48742	-0.180451	-5.01553	3.82373e-05	0.000503248	2.13356
ENSG00000165568.13	-1.16487	3.33216	-5.03675	3.62197e-05	0.00048409	2.13142
ENSG00000155393.8	0.681824	4.31694	5.11434	2.97126e-05	0.00042693	2.13028
ENSG00000140836.10	-0.74549	8.1477	-5.21305	2.31051e-05	0.000357789	2.13025
ENSG00000215853.3	6.666	0.380896	5.03771	3.61309e-05	0.000483278	2.12894
ENSG00000158486.9	2.11523	0.0529383	4.96837	4.31349e-05	0.00054471	2.12509
ENSG00000104522.11	0.873281	4.71986	5.13502	2.81859e-05	0.00041281	2.1203
ENSG00000087495.12	2.49003	-0.35227	4.99105	4.07052e-05	0.000523669	2.11341
ENSG00000115419.8	0.55443	8.12706	5.20608	2.35185e-05	0.000362088	2.1123
ENSG00000143375.10	2.13199	3.10868	5.0009	3.96933e-05	0.000515713	2.11171
ENSG00000175445.10	-2.00951	4.6268	-5.09911	3.08898e-05	0.00043764	2.10782
ENSG00000170837.2	-1.78396	1.05237	-4.94236	4.61013e-05	0.000573868	2.10586
ENSG00000152457.13	0.606372	4.95013	5.14244	2.76579e-05	0.000408304	2.10355
ENSG00000103490.13	0.783649	4.7595	5.12869	2.86447e-05	0.000416308	2.09729
ENSG00000143217.7	3.13782	3.18788	4.98261	4.1593e-05	0.00052883	2.09565
ENSG00000103056.7	3.2908	3.63094	4.99918	3.98677e-05	0.000516769	2.09509
ENSG00000126458.3	-0.752756	3.63732	-5.04719	3.52663e-05	0.000476822	2.08855
ENSG00000142623.8	5.63559	1.32335	4.94861	4.53697e-05	0.000565879	2.08673
ENSG00000151725.7	1.87981	3.34447	5.01319	3.84656e-05	0.000505096	2.08448
ENSG00000126067.7	0.760964	6.50271	5.18378	2.48928e-05	0.000376518	2.08402
ENSG00000143458.7	-0.594992	4.79478	-5.12511	2.89074e-05	0.000418772	2.083
ENSG00000157045.4	-0.526174	5.5897	-5.15955	2.6478e-05	0.000396318	2.07616
ENSG00000188517.10	-3.7452	1.22247	-4.9306	4.75083e-05	0.000584547	2.0761
ENSG00000135127.7	2.31724	3.58334	5.00547	3.92328e-05	0.00051166	2.07227
ENSG00000175592.4	3.24555	2.08743	4.93369	4.71352e-05	0.000581694	2.07125
ENSG00000167114.8	1.11096	5.10262	5.13253	2.83653e-05	0.000413433	2.06855
ENSG00000130055.9	4.76551	-0.921104	5.04695	3.52884e-05	0.000476822	2.06779
ENSG00000174516.10	-0.73036	3.26349	-5.01028	3.87531e-05	0.000507324	2.06512
ENSG00000164237.4	-1.27862	2.86636	-4.98112	4.17512e-05	0.000530059	2.06113
ENSG00000110400.6	1.9773	7.66577	5.18218	2.49944e-05	0.000377556	2.06075
ENSG00000181085.10	-1.32538	1.28195	-4.92248	4.85061e-05	0.000590441	2.0579
ENSG00000115163.10	2.99799	-0.384575	4.97196	4.27406e-05	0.000540231	2.05317
ENSG00000184313.15	-1.20401	4.29415	-5.07622	3.27475e-05	0.000455347	2.05315
ENSG00000135932.6	0.43927	5.90188	5.16051	2.64133e-05	0.000395695	2.05307
ENSG00000102290.17	-3.14433	1.31131	-4.91924	4.89095e-05	0.000593389	2.05042
ENSG00000181788.3	0.565571	4.21187	5.07307	3.30116e-05	0.000457067	2.04746
ENSG00000144476.5	-1.17381	4.30174	-5.07425	3.29121e-05	0.000456162	2.04709
ENSG00000100526.15	2.13994	1.26886	4.91768	4.91059e-05	0.000594639	2.0459
ENSG00000088726.11	3.88318	2.2197	4.92229	4.85294e-05	0.000590441	2.04584
ENSG00000117650.8	2.42813	1.36636	4.91794	4.90728e-05	0.000594639	2.0451
ENSG00000080947.10	-0.936409	3.48912	-5.01227	3.85565e-05	0.000505519	2.04234
ENSG00000143643.8	0.665056	5.07483	5.12306	2.90587e-05	0.000420338	2.03851
ENSG00000146757.9	0.57058	4.89609	5.11382	2.97515e-05	0.000427121	2.03761
ENSG00000085840.8	1.72675	2.03179	4.9252	4.81695e-05	0.000588556	2.0362
ENSG00000106330.7	0.598196	4.17924	5.06324	3.38507e-05	0.000464316	2.03158
ENSG00000172818.5	2.6209	2.16996	4.92321	4.84156e-05	0.000590202	2.03068
ENSG00000176208.4	0.869029	5.26789	5.12548	2.88801e-05	0.000418772	2.0266
ENSG00000203760.4	1.35384	0.930571	4.90767	5.03786e-05	0.000605668	2.02278
ENSG00000181649.5	1.93531	2.24024	4.92196	4.85701e-05	0.000590519	2.01623
ENSG00000221890.2	-1.72676	1.69361	-4.91015	5.00606e-05	0.000602687	2.01595
ENSG00000182446.9	0.492071	6.54635	5.15723	2.66347e-05	0.000398318	2.01256
ENSG00000008311.10	-0.69009	6.41526	-5.15393	2.68596e-05	0.000400638	2.01149
ENSG00000203722.3	2.28448	0.0530032	4.91673	4.92245e-05	0.000595206	2.00767
ENSG00000103034.10	1.83958	2.62461	4.93675	4.67669e-05	0.000577681	2.00418
ENSG00000079482.11	-0.544111	4.90657	-5.10009	3.08125e-05	0.000436904	2.00094
ENSG00000100711.9	-0.604083	4.96403	-5.10183	3.06757e-05	0.000435681	2.00079
ENSG00000150054.14	1.53385	4.4322	5.05498	3.45717e-05	0.00047147	1.9996
ENSG00000140092.10	-1.37237	5.37279	-5.11351	2.97755e-05	0.000427121	1.99958
ENSG00000101624.6	0.504615	4.11795	5.04295	3.56508e-05	0.000479535	1.99122
ENSG00000147804.5	1.06056	2.9433	4.95275	4.48921e-05	0.000562474	1.99108
ENSG00000213927.3	4.65142	-0.531582	4.99193	4.06137e-05	0.000522939	1.98961
ENSG00000258227.2	1.70569	0.461674	4.90184	5.11363e-05	0.000611789	1.98623
ENSG00000100767.11	-0.865371	5.4288	-5.11557	2.96193e-05	0.000426657	1.98477
ENSG00000104177.13	1.34016	4.82131	5.08058	3.23849e-05	0.000453231	1.98279
ENSG00000196562.10	1.34106	6.14486	5.13361	2.82879e-05	0.00041281	1.97821
ENSG00000019485.8	-0.868303	2.96739	-4.95189	4.49912e-05	0.000563212	1.9781
ENSG00000107518.12	-2.3419	5.02053	-5.06973	3.32945e-05	0.000459245	1.97216
ENSG00000196683.6	-0.952518	6.24596	-5.13367	2.82831e-05	0.00041281	1.97153
ENSG00000145425.5	-0.810711	9.45146	-5.14918	2.71871e-05	0.000403236	1.9674
ENSG00000140326.8	-0.455587	4.56141	-5.06656	3.35646e-05	0.000461862	1.96486
ENSG00000156599.6	0.498011	6.78072	5.14087	2.7769e-05	0.000408892	1.96357
ENSG00000100292.12	1.42732	4.10745	5.02092	3.77135e-05	0.000497495	1.96347
ENSG00000182218.5	-1.04255	2.98429	-4.94446	4.58537e-05	0.000571198	1.9492
ENSG00000110237.3	-0.872423	6.92292	-5.13356	2.82913e-05	0.00041281	1.94291
ENSG00000136002.12	2.35778	5.83473	5.09334	3.13475e-05	0.000443031	1.9402
ENSG00000109846.3	-1.33145	5.93709	-5.11193	2.98955e-05	0.000427774	1.93924
ENSG00000130653.11	-1.02288	5.68124	-5.10548	3.03919e-05	0.000432721	1.93849
ENSG00000120162.9	-0.718841	4.57134	-5.05331	3.47196e-05	0.000472845	1.93731
ENSG00000117289.7	-0.82933	8.67845	-5.13629	2.80953e-05	0.000412287	1.93412
ENSG00000181333.11	6.0358	0.754707	4.90116	5.12255e-05	0.00061243	1.93387
ENSG00000164330.12	-1.15069	5.1609	-5.07758	3.26336e-05	0.000455347	1.92784
ENSG00000133703.7	0.64474	4.33298	5.03303	3.65651e-05	0.000486444	1.92728
ENSG00000131016.12	-1.40574	7.73439	-5.13117	2.84642e-05	0.000414524	1.92656
ENSG00000197561.2	-3.40899	0.138099	-4.89971	5.14153e-05	0.000613848	1.92597
ENSG00000120539.10	0.798878	4.84541	5.06339	3.38377e-05	0.000464316	1.92311
ENSG00000077152.5	2.07586	1.27396	4.86649	5.59784e-05	0.000652449	1.9229
ENSG00000205758.7	-0.60591	4.81087	-5.06393	3.37911e-05	0.000464236	1.9227
ENSG00000133392.12	-3.49871	5.91582	-5.07256	3.30551e-05	0.000457067	1.92199
ENSG00000156510.11	-3.9704	3.93298	-4.93854	4.65543e-05	0.00057742	1.92058
ENSG00000269190.1	-1.06597	3.49712	-4.96622	4.33725e-05	0.000546244	1.92037
ENSG00000131459.8	-0.998188	4.43565	-5.036	3.62891e-05	0.000484402	1.91961
ENSG00000170786.8	3.75467	2.33063	4.87107	5.5326e-05	0.000647085	1.91847
ENSG00000104728.11	-0.66486	6.46281	-5.11727	2.9491e-05	0.00042552	1.91401
ENSG00000131979.14	1.73726	3.50161	4.95051	4.51497e-05	0.000563651	1.91398
ENSG00000111737.7	0.457349	5.79814	5.10268	3.06097e-05	0.000435102	1.91352
ENSG00000092096.10	-1.42296	4.45427	-5.03224	3.66392e-05	0.000487052	1.91342
ENSG00000180316.7	3.55024	1.5634	4.85958	5.69782e-05	0.000659691	1.90804
ENSG00000197329.7	0.742503	5.69705	5.09432	3.12692e-05	0.000442287	1.90227
ENSG00000215021.4	-0.775528	6.9136	-5.11605	2.95831e-05	0.000426492	1.89929
ENSG00000176563.5	-2.7186	-2.03175	-5.04127	3.58036e-05	0.000480767	1.89924
ENSG00000197953.5	4.53452	2.53177	4.86566	5.60971e-05	0.00065256	1.89668
ENSG00000196787.2	1.54454	3.99396	4.98429	4.14148e-05	0.000527732	1.89486
ENSG00000152767.11	-0.898452	7.21329	-5.11436	2.97112e-05	0.00042693	1.88769
ENSG00000104725.9	3.17864	-0.255875	4.8915	5.25072e-05	0.000622999	1.88753
ENSG00000107779.7	-0.595546	5.6568	-5.08738	3.18278e-05	0.000447982	1.88726
ENSG00000105137.8	-1.09742	5.57371	-5.08128	3.23271e-05	0.000453158	1.88713
ENSG00000187583.6	2.50468	2.63773	4.88026	5.40403e-05	0.000637427	1.88193
ENSG00000145779.7	1.11185	4.30303	5.00577	3.92025e-05	0.000511652	1.88027
ENSG00000132677.8	3.5136	-0.564062	4.90219	5.10912e-05	0.000611674	1.87716
ENSG00000129757.8	-1.73097	4.35103	-4.99787	4.0002e-05	0.000517772	1.87708
ENSG00000104312.6	0.672142	4.69328	5.03935	3.59798e-05	0.000482007	1.87614
ENSG00000092820.13	0.791286	7.31407	5.10978	3.00604e-05	0.000429419	1.87487
ENSG00000138685.8	-1.43979	5.07378	-5.05229	3.48105e-05	0.000473709	1.8744
ENSG00000102910.9	-0.871074	8.67412	-5.1123	2.98671e-05	0.000427722	1.87307
ENSG00000165490.8	1.96959	2.33508	4.87576	5.46655e-05	0.00064329	1.87008
ENSG00000144061.8	-0.612684	3.3947	-4.93739	4.66913e-05	0.000577681	1.86343
ENSG00000184459.4	5.6528	2.07546	4.83715	6.03462e-05	0.000691253	1.85595
ENSG00000129521.9	1.78041	3.69415	4.93704	4.6733e-05	0.000577681	1.8473
ENSG00000165868.8	-1.89428	6.53113	-5.08494	3.20267e-05	0.000450046	1.8457
ENSG00000130159.9	-0.870861	4.47584	-5.00916	3.88644e-05	0.000508395	1.8444
ENSG00000154134.10	-0.973172	3.91136	-4.96598	4.33992e-05	0.000546244	1.83616
ENSG00000176153.10	3.71519	1.63361	4.82774	6.18175e-05	0.000702501	1.83506
ENSG00000167779.3	-2.1457	2.76346	-4.8741	5.48988e-05	0.000644002	1.83249
ENSG00000100092.16	0.79705	5.66206	5.06414	3.37731e-05	0.000464236	1.8304
ENSG00000110786.13	-2.7443	-0.696764	-4.88525	5.33545e-05	0.00063088	1.82966
ENSG00000118322.8	3.01193	3.91016	4.91759	4.9116e-05	0.000594639	1.82802
ENSG00000130475.10	1.52684	3.62137	4.92603	4.80674e-05	0.000587847	1.82725
ENSG00000138613.9	-1.28488	4.30409	-4.98602	4.12315e-05	0.000526956	1.82707
ENSG00000118058.16	-0.385001	9.49497	-5.09298	3.13761e-05	0.000443072	1.82435
ENSG00000003096.9	-1.33662	2.10145	-4.84203	5.95961e-05	0.000684025	1.8223
ENSG00000165966.10	-2.78311	0.648204	-4.82585	6.21166e-05	0.00070497	1.82198
ENSG00000028116.12	0.512744	5.46452	5.05623	3.44619e-05	0.000470452	1.82188
ENSG00000138002.10	-0.602936	6.47588	-5.08073	3.23724e-05	0.000453231	1.82136
ENSG00000147592.4	0.631883	3.50805	4.92852	4.77623e-05	0.000586492	1.82116
ENSG00000186395.6	3.94575	8.96543	5.08738	3.18278e-05	0.000447982	1.81849
ENSG00000135486.13	-0.662132	9.39367	-5.09064	3.15642e-05	0.000445363	1.81828
ENSG00000064687.8	1.34849	5.27036	5.0357	3.63166e-05	0.000484402	1.81616
ENSG00000244119.1	-1.15098	0.808924	-4.81898	6.32201e-05	0.000712489	1.81358
ENSG00000146013.6	-3.5117	1.50806	-4.81836	6.33196e-05	0.000712521	1.8115
ENSG00000174343.5	3.93097	-0.282428	4.86271	5.65226e-05	0.000656623	1.809
ENSG00000127423.6	2.90162	0.16568	4.82993	6.14716e-05	0.000699532	1.80893
ENSG00000064961.14	0.804811	6.29923	5.07203	3.30994e-05	0.000457287	1.80784
ENSG00000095970.12	3.20151	0.648966	4.82131	6.28437e-05	0.000710613	1.80722
ENSG00000104885.13	0.540194	6.54597	5.07508	3.28428e-05	0.000456162	1.8039
ENSG00000167977.4	0.656866	3.70199	4.93327	4.71859e-05	0.000581903	1.79821
ENSG00000079805.12	0.498113	7.99216	5.08207	3.22622e-05	0.000452616	1.79703
ENSG00000123159.11	0.643887	5.34606	5.03957	3.59597e-05	0.000482007	1.79325
ENSG00000182261.3	5.21597	0.595996	4.83328	6.0946e-05	0.000696734	1.79011
ENSG00000184574.5	1.21985	2.99139	4.874	5.49129e-05	0.000644002	1.78706
ENSG00000134265.8	0.462094	4.37721	4.98339	4.15096e-05	0.000528549	1.7845
ENSG00000110321.11	0.432576	9.68864	5.07704	3.26792e-05	0.000455347	1.78403
ENSG00000169554.12	-0.54859	9.98416	-5.07641	3.27318e-05	0.000455347	1.7832
ENSG00000167767.9	3.73097	4.5177	4.91571	4.93535e-05	0.000596256	1.78104
ENSG00000130338.8	0.694109	7.22147	5.07253	3.30569e-05	0.000457067	1.78092
ENSG00000161509.9	-2.17997	-0.576727	-4.85276	5.79814e-05	0.000669507	1.77817
ENSG00000145506.9	1.46199	3.98724	4.94004	4.63749e-05	0.000576438	1.77649
ENSG00000107130.6	0.921769	2.84463	4.86137	5.67177e-05	0.000658002	1.77512
ENSG00000120875.4	1.31008	6.6265	5.06042	3.40954e-05	0.000466557	1.77116
ENSG00000135903.14	-1.32821	7.68818	-5.07003	3.32687e-05	0.000459245	1.77108
ENSG00000109794.9	-1.00112	4.83447	-4.99979	3.98055e-05	0.000516392	1.76705
ENSG00000124440.11	-3.46639	3.06454	-4.8327	6.10378e-05	0.00069732	1.76595
ENSG00000103769.5	0.684849	6.2507	5.05476	3.45912e-05	0.00047147	1.7658
ENSG00000173264.9	0.668299	4.67716	4.99456	4.03413e-05	0.00051982	1.76343
ENSG00000125124.7	-0.730575	6.71266	-5.05987	3.41426e-05	0.000466832	1.76097
ENSG00000179826.5	-3.31154	-2.03193	-4.9622	4.3821e-05	0.000550254	1.75983
ENSG00000139726.6	0.454294	5.34737	5.02643	3.71864e-05	0.000493185	1.75949
ENSG00000230453.5	3.47392	1.66613	4.79606	6.70426e-05	0.000740866	1.75817
ENSG00000165996.9	-1.33746	4.0845	-4.94002	4.63776e-05	0.000576438	1.75802
ENSG00000101224.13	0.721858	5.80852	5.04017	3.59045e-05	0.000481746	1.75565
ENSG00000188488.9	-2.46975	1.58045	-4.7966	6.69503e-05	0.000740321	1.75049
ENSG00000203865.5	-1.39984	-0.0877202	-4.81157	6.44311e-05	0.000720792	1.74864
ENSG00000185507.15	0.907488	4.46481	4.97201	4.27349e-05	0.000540231	1.74765
ENSG00000119314.11	0.873509	8.56374	5.06287	3.38824e-05	0.00046438	1.7472
ENSG00000076685.14	-0.380703	6.21251	-5.04714	3.52714e-05	0.000476822	1.74632
ENSG00000186807.9	3.47075	4.05483	4.88031	5.40335e-05	0.000637427	1.74104
ENSG00000169679.10	2.23086	3.16153	4.86642	5.5989e-05	0.000652449	1.73953
ENSG00000131969.10	-1.39232	3.69035	-4.89876	5.15405e-05	0.000614917	1.73729
ENSG00000169432.10	-1.28636	5.17736	-5.00028	3.97562e-05	0.000516142	1.73402
ENSG00000104892.12	2.42585	2.76094	4.82276	6.26111e-05	0.000709181	1.72883
ENSG00000196550.6	1.61026	0.781035	4.7818	6.95365e-05	0.000762556	1.72675
ENSG00000161911.7	2.8084	-0.517384	4.83053	6.13768e-05	0.000699515	1.72471
ENSG00000186648.10	1.56369	2.4361	4.81304	6.41887e-05	0.0007194	1.72028
ENSG00000088986.6	0.771298	6.68904	5.04299	3.56464e-05	0.000479535	1.71916
ENSG00000154856.8	1.47631	7.88492	5.04856	3.51431e-05	0.000476353	1.7156
ENSG00000180638.13	3.58848	0.445331	4.78615	6.87659e-05	0.000756997	1.71446
ENSG00000059728.6	1.05744	3.23063	4.8615	5.66986e-05	0.000658002	1.71386
ENSG00000096433.6	0.83991	8.34325	5.04942	3.50659e-05	0.000476257	1.71323
ENSG00000121671.7	-0.699966	5.09144	-4.99526	4.02699e-05	0.000519289	1.71307
ENSG00000242114.1	1.3303	0.793631	4.77626	7.05304e-05	0.000769537	1.71293
ENSG00000072609.13	0.578691	5.46008	5.0114	3.86428e-05	0.000506264	1.71077
ENSG00000004399.8	-0.595519	8.12674	-5.04572	3.53989e-05	0.000477193	1.70422
ENSG00000196531.6	-0.543475	9.15646	-5.04587	3.53857e-05	0.000477193	1.70391
ENSG00000197724.6	-0.456588	6.41319	-5.03355	3.65167e-05	0.000486328	1.70338
ENSG00000106615.5	0.591253	5.19759	4.99658	4.0134e-05	0.000519091	1.70049
ENSG00000112984.7	2.69927	2.18805	4.78536	6.89049e-05	0.000757558	1.70023
ENSG00000151790.4	3.43915	-0.0615571	4.8	6.63698e-05	0.000735317	1.69635
ENSG00000175643.7	1.62003	0.616545	4.77119	7.14534e-05	0.000775802	1.69414
ENSG00000109321.6	4.62209	0.0985649	4.81099	6.45271e-05	0.000721397	1.69231
ENSG00000174059.12	-1.22932	5.71462	-5.00652	3.91276e-05	0.000511061	1.69011
ENSG00000197136.4	0.461452	6.86971	5.03343	3.65282e-05	0.000486328	1.6877
ENSG00000078618.15	0.472061	7.788	5.03814	3.60912e-05	0.000483123	1.68642
ENSG00000133805.11	1.1705	4.57172	4.94841	4.53938e-05	0.000565879	1.6852
ENSG00000110880.6	0.554318	6.818	5.03087	3.67675e-05	0.000488382	1.6822
ENSG00000166402.4	-1.57732	3.72996	-4.88014	5.40563e-05	0.000637427	1.67853
ENSG00000146090.11	-2.84959	-0.241358	-4.79435	6.73361e-05	0.000742366	1.67838
ENSG00000163879.9	-2.03785	0.882966	-4.76079	7.33814e-05	0.000790135	1.6769
ENSG00000103710.6	-1.30201	4.05936	-4.90388	5.08698e-05	0.000609872	1.67095
ENSG00000173744.13	0.423484	6.33474	5.01969	3.78321e-05	0.000498678	1.6708
ENSG00000176293.15	-1.2475	4.13745	-4.9058	5.06202e-05	0.000607302	1.67049
ENSG00000135094.6	3.18408	-1.18351	4.86728	5.58654e-05	0.000652449	1.67043
ENSG00000110881.7	-2.31003	1.387	-4.75985	7.35595e-05	0.000791063	1.66682
ENSG00000105928.9	1.95522	2.04946	4.7802	6.98223e-05	0.000763745	1.66417
ENSG00000164105.3	-1.29244	4.12074	-4.9062	5.05694e-05	0.000607114	1.66328
ENSG00000120685.15	0.836043	7.16213	5.02496	3.73269e-05	0.000494287	1.66195
ENSG00000124143.6	4.90623	0.88875	4.7608	7.33805e-05	0.000790135	1.65678
ENSG00000077498.8	0.972575	9.13716	5.02604	3.72234e-05	0.000493296	1.6535
ENSG00000205420.6	4.68394	7.33888	4.99555	4.02395e-05	0.000519289	1.65268
ENSG00000115762.12	0.660907	4.46173	4.93265	4.72605e-05	0.000582407	1.64719
ENSG00000237515.6	-2.95944	-1.16674	-4.84766	5.87438e-05	0.000676948	1.64612
ENSG00000124942.9	-0.441536	13.3176	-5.01283	3.85017e-05	0.000505185	1.64519
ENSG00000129422.9	-0.785282	7.66701	-5.02104	3.77023e-05	0.000497495	1.64459
ENSG00000126787.8	2.85481	2.0118	4.76372	7.28335e-05	0.000786201	1.64333
ENSG00000172244.4	0.864073	2.32546	4.77829	7.01653e-05	0.000766038	1.64099
ENSG00000197275.8	0.696525	3.91777	4.89235	5.23929e-05	0.000622855	1.63961
ENSG00000127324.4	-3.88258	-0.0348254	-4.78115	6.96517e-05	0.000762848	1.63721
ENSG00000116830.7	0.497424	5.49521	4.98454	4.13878e-05	0.000527732	1.63632
ENSG00000134690.6	2.13821	0.372804	4.74686	7.60495e-05	0.000805769	1.63526
ENSG00000178691.6	0.405539	6.14131	5.00241	3.95404e-05	0.000514115	1.63514
ENSG00000102554.9	1.9038	6.19727	4.9903	4.07829e-05	0.000523943	1.62772
ENSG00000161921.10	1.00708	4.35655	4.91183	4.98463e-05	0.000600946	1.62305
ENSG00000120471.10	2.34704	3.58864	4.83043	6.13923e-05	0.000699515	1.62259
ENSG00000111331.8	1.03281	5.91067	4.98952	4.0865e-05	0.000524607	1.62199
ENSG00000156140.4	-1.81327	2.89135	-4.79494	6.7235e-05	0.00074204	1.619
ENSG00000081320.6	1.079	5.55889	4.9761	4.22911e-05	0.000535728	1.61847
ENSG00000184785.4	-0.963236	1.69774	-4.74608	7.6201e-05	0.000806383	1.618
ENSG00000124571.13	0.68055	6.44227	4.99892	3.98945e-05	0.000516769	1.61536
ENSG00000116117.13	-0.84265	5.95449	-4.98756	4.10703e-05	0.000526448	1.61308
ENSG00000196782.8	-1.12551	7.25331	-5.00464	3.93159e-05	0.000511969	1.61002
ENSG00000095303.10	1.67541	4.99923	4.939	4.64985e-05	0.000577144	1.60981
ENSG00000030110.8	0.737199	3.1846	4.81852	6.32945e-05	0.000712521	1.6089
ENSG00000167363.9	-0.975026	4.64982	-4.92728	4.79143e-05	0.000587847	1.6081
ENSG00000134202.6	-1.39863	4.26698	-4.88903	5.28402e-05	0.000625658	1.60535
ENSG00000158402.14	2.15856	-0.209839	4.75136	7.51763e-05	0.000801174	1.60511
ENSG00000152558.10	0.614958	6.53897	4.99623	4.01702e-05	0.000519169	1.60398
ENSG00000169515.5	-1.40171	4.59023	-4.91519	4.9419e-05	0.000596629	1.59998
ENSG00000175324.5	0.683607	4.17844	4.89331	5.22645e-05	0.000622692	1.59868
ENSG00000141295.9	-0.548229	4.58922	-4.923	4.84412e-05	0.000590202	1.59866
ENSG00000100129.13	-0.927871	8.78436	-5.00257	3.95237e-05	0.000514115	1.59358
ENSG00000189433.5	3.81839	0.637207	4.73124	7.91549e-05	0.000827978	1.59264
ENSG00000135736.5	-0.659153	3.10084	-4.80429	6.56438e-05	0.000729279	1.58823
ENSG00000169220.13	0.855635	3.81254	4.85834	5.71583e-05	0.000660975	1.58801
ENSG00000112378.11	2.3693	6.9892	4.98709	4.1119e-05	0.000526448	1.58736
ENSG00000174807.3	-1.44493	6.92897	-4.9908	4.07312e-05	0.000523669	1.58457
ENSG00000101198.10	-2.92316	-0.311	-4.75218	7.50183e-05	0.000800753	1.58367
ENSG00000140332.11	0.595056	6.31758	4.98179	4.16798e-05	0.000529542	1.57615
ENSG00000091651.4	1.83205	0.806423	4.71759	8.19737e-05	0.000853835	1.57537
ENSG00000144713.8	-0.701909	8.79188	-4.99542	4.02528e-05	0.000519289	1.57522
ENSG00000242689.1	2.31277	-0.565609	4.75038	7.53666e-05	0.000801986	1.57373
ENSG00000153037.8	0.540923	4.97172	4.93667	4.67765e-05	0.000577681	1.57355
ENSG00000158246.7	1.71627	3.26002	4.8024	6.5962e-05	0.000732096	1.57347
ENSG00000198854.4	7.94079	0.897536	4.77326	7.10749e-05	0.000774007	1.56638
ENSG00000110871.10	-0.618231	3.92195	-4.85984	5.69404e-05	0.000659691	1.56511
ENSG00000168824.10	1.3334	6.33016	4.97326	4.25991e-05	0.000539234	1.5644
ENSG00000178187.3	-1.27409	2.65435	-4.76238	7.3083e-05	0.0007884	1.56172
ENSG00000179542.11	-2.07371	2.32381	-4.73948	7.75001e-05	0.000814626	1.55976
ENSG00000161016.11	-0.793096	9.1809	-4.98843	4.09786e-05	0.000525674	1.55765
ENSG00000174444.10	-0.66661	10.271	-4.98698	4.11307e-05	0.000526448	1.55616
ENSG00000063601.12	0.51676	5.55723	4.95436	4.4708e-05	0.000560574	1.55469
ENSG00000162959.9	0.410421	4.84063	4.92113	4.86744e-05	0.00059137	1.55308
ENSG00000050393.7	0.760557	4.64775	4.90739	5.04148e-05	0.00060568	1.55287
ENSG00000116668.8	-0.517429	4.90128	-4.92303	4.84374e-05	0.000590202	1.55247
ENSG00000103222.14	0.709731	6.92688	4.9798	4.18926e-05	0.000531071	1.55091
ENSG00000186638.11	1.04821	2.84809	4.77063	7.1555e-05	0.000775802	1.54902
ENSG00000187164.13	0.70242	6.08732	4.96591	4.34065e-05	0.000546244	1.5468
ENSG00000137561.4	-2.28957	0.303711	-4.71158	8.32451e-05	0.000864464	1.54527
ENSG00000068383.14	-0.670639	4.48701	-4.89288	5.23222e-05	0.000622855	1.5434
ENSG00000144868.9	-2.49156	3.55442	-4.79566	6.71115e-05	0.000741152	1.54283
ENSG00000154175.12	-1.17981	7.64944	-4.97994	4.1878e-05	0.000531071	1.54157
ENSG00000176974.13	-0.775928	4.72475	-4.90264	5.10325e-05	0.000611396	1.53328
ENSG00000137267.5	1.20674	6.60847	4.96713	4.32712e-05	0.000545737	1.53044
ENSG00000166411.9	0.449416	5.12896	4.92656	4.80018e-05	0.000587847	1.53028
ENSG00000117425.9	-1.796	3.96296	-4.82986	6.14826e-05	0.000699532	1.53007
ENSG00000169247.7	-1.1756	5.16254	-4.92336	4.83969e-05	0.000590202	1.52921
ENSG00000015171.14	-0.475105	6.62872	-4.96816	4.31582e-05	0.00054471	1.52868
ENSG00000167513.4	1.37228	1.8686	4.71366	8.28021e-05	0.000860383	1.52816
ENSG00000172243.13	1.47977	4.3625	4.86626	5.60119e-05	0.000652449	1.52661
ENSG00000065717.10	-1.52806	3.78461	-4.81717	6.35137e-05	0.000714238	1.5232
ENSG00000113083.8	-1.70387	4.96105	-4.89631	5.18645e-05	0.000618354	1.51578
ENSG00000110092.3	0.797852	6.80853	4.96286	4.37462e-05	0.000549716	1.51072
ENSG00000170485.12	1.28369	4.80063	4.89241	5.2385e-05	0.000622855	1.50464
ENSG00000165495.11	-1.34468	5.86062	-4.9382	4.6594e-05	0.000577498	1.5033
ENSG00000134028.10	4.15578	1.65122	4.68767	8.85056e-05	0.000905448	1.50197
ENSG00000182489.7	3.43254	3.25985	4.73873	7.76489e-05	0.000815196	1.50003
ENSG00000007202.10	0.320264	8.65297	4.96465	4.35473e-05	0.000547615	1.49659
ENSG00000135114.8	2.03851	2.38048	4.71684	8.213e-05	0.000854385	1.49634
ENSG00000196584.2	1.32902	1.78252	4.69628	8.65752e-05	0.000890991	1.4933
ENSG00000180875.4	-1.83107	-0.0549009	-4.69699	8.64178e-05	0.000890434	1.49274
ENSG00000131477.6	-0.793513	3.8453	-4.8213	6.28452e-05	0.000710613	1.49004
ENSG00000122574.6	1.94644	2.4974	4.71663	8.21753e-05	0.000854385	1.48942
ENSG00000255112.2	0.562764	5.3486	4.91943	4.88856e-05	0.000593389	1.48771
ENSG00000129925.6	0.95053	5.37422	4.91667	4.9232e-05	0.000595206	1.48415
ENSG00000154654.10	-1.61482	4.21817	-4.8375	6.02919e-05	0.000691091	1.4836
ENSG00000185942.7	-2.36421	1.22997	-4.6791	9.04728e-05	0.000921995	1.48203
ENSG00000185275.6	3.40454	0.754367	4.67837	9.06411e-05	0.00092291	1.47998
ENSG00000183696.9	1.05625	3.53071	4.79068	6.79727e-05	0.000748743	1.47848
ENSG00000135637.9	-0.63234	4.48341	-4.8663	5.60053e-05	0.000652449	1.4761
ENSG00000086300.11	2.10115	3.94924	4.80034	6.63109e-05	0.000735137	1.47516
ENSG00000145979.13	0.996872	4.34682	4.84977	5.84272e-05	0.000673751	1.47438
ENSG00000142235.4	1.57633	2.21137	4.70278	8.51446e-05	0.000880474	1.47413
ENSG00000140379.7	1.55463	4.07997	4.82301	6.25712e-05	0.000709181	1.47282
ENSG00000149308.12	0.403018	7.19162	4.95136	4.50527e-05	0.000563212	1.47196
ENSG00000140678.12	1.48365	5.94863	4.92611	4.80572e-05	0.000587847	1.47148
ENSG00000196263.3	-0.92453	4.37137	-4.85105	5.82359e-05	0.000671995	1.4709
ENSG00000180182.6	0.44555	7.87673	4.9511	4.50818e-05	0.000563212	1.46399
ENSG00000085832.12	-0.709273	8.35229	-4.95148	4.50387e-05	0.000563212	1.46357
ENSG00000163814.3	1.99166	4.15676	4.81039	6.46261e-05	0.000722035	1.45848
ENSG00000135409.6	-2.55844	-1.7442	-4.81181	6.43922e-05	0.000720792	1.45443
ENSG00000145386.5	1.45431	2.89663	4.73296	7.88069e-05	0.000825843	1.45431
ENSG00000103569.5	3.97609	-0.0840123	4.69648	8.65296e-05	0.000890991	1.45214
ENSG00000139197.6	-0.541268	5.02027	-4.88965	5.27568e-05	0.00062523	1.45206
ENSG00000135324.5	-1.56803	0.210236	-4.67089	9.23964e-05	0.000937717	1.45079
ENSG00000162069.10	3.81831	1.82577	4.67078	9.24219e-05	0.000937717	1.4482
ENSG00000157216.11	-0.632452	5.51841	-4.90865	5.02528e-05	0.000604578	1.4467
ENSG00000111752.6	-0.628015	6.3825	-4.93168	4.73777e-05	0.000583433	1.44562
ENSG00000137878.12	2.07871	4.14389	4.80634	6.53001e-05	0.000727678	1.44532
ENSG00000122359.13	-0.37665	6.87385	-4.93732	4.66995e-05	0.000577681	1.44246
ENSG00000147883.9	1.60397	2.43562	4.69924	8.59199e-05	0.000886364	1.44052
ENSG00000188629.7	-0.976425	3.13524	-4.74562	7.62918e-05	0.000806848	1.43902
ENSG00000147402.7	2.63954	-1.41681	4.75728	7.40453e-05	0.000793898	1.43772
ENSG00000138639.13	-0.734806	6.4384	-4.92861	4.77512e-05	0.000586492	1.43599
ENSG00000026508.12	-0.661048	10.1753	-4.93976	4.64081e-05	0.000576438	1.43559
ENSG00000069849.6	0.74739	6.38867	4.92595	4.80774e-05	0.000587847	1.43219
ENSG00000241644.2	-1.76586	2.44515	-4.69495	8.68704e-05	0.000891365	1.43199
ENSG00000151503.8	0.598054	5.73091	4.91019	5.00551e-05	0.000602687	1.43072
ENSG00000125652.3	-0.763365	3.92489	-4.80221	6.5994e-05	0.000732096	1.42167
ENSG00000114529.8	3.0008	2.47204	4.67899	9.04976e-05	0.000921995	1.42114
ENSG00000198055.6	0.750675	5.1759	4.88538	5.33363e-05	0.00063088	1.41989
ENSG00000079819.12	-0.763125	7.36551	-4.93038	4.7536e-05	0.000584547	1.41637
ENSG00000134917.9	-1.81717	1.60871	-4.66067	9.48502e-05	0.000955602	1.41491
ENSG00000130311.6	0.775638	3.24226	4.75101	7.52438e-05	0.000801174	1.41402
ENSG00000172318.4	1.89057	0.43817	4.64851	9.78528e-05	0.00097735	1.41074
ENSG00000099958.10	1.90799	2.45439	4.68081	9.00762e-05	0.000919333	1.40597
ENSG00000169180.7	0.43825	7.49812	4.92644	4.80168e-05	0.000587847	1.40451
ENSG00000175352.6	1.16032	1.2635	4.64887	9.77631e-05	0.00097735	1.4044
ENSG00000136542.4	1.50248	3.13764	4.73177	7.90479e-05	0.000827362	1.40354
ENSG00000167994.7	-0.764471	3.51967	-4.75994	7.35423e-05	0.000791063	1.39657
ENSG00000213197.3	-1.98707	0.989479	-4.64015	9.9971e-05	0.000993253	1.39268
ENSG00000104960.11	-0.472702	5.63006	-4.89186	5.24589e-05	0.000622855	1.39073
ENSG00000101104.8	0.974077	4.95238	4.85994	5.69256e-05	0.000659691	1.38918
ENSG00000134602.11	-0.963559	3.54443	-4.75675	7.41457e-05	0.000793898	1.38894
ENSG00000141759.10	0.673492	5.20497	4.87362	5.49663e-05	0.00064419	1.38814
ENSG00000105939.8	0.487051	6.88666	4.9147	4.94807e-05	0.000596956	1.38488
ENSG00000116793.11	0.752152	4.43821	4.82693	6.19462e-05	0.0007035	1.37828
ENSG00000162980.12	0.842681	5.29925	4.87261	5.51083e-05	0.000645415	1.37763
ENSG00000187667.6	-1.08435	0.905097	-4.63324	0.000101759	0.00100695	1.37598
ENSG00000150787.3	0.692051	3.69472	4.76617	7.23771e-05	0.000782254	1.37573
ENSG00000144339.7	-3.80247	-0.414449	-4.68183	8.98411e-05	0.000917476	1.37343
ENSG00000036054.8	0.372364	5.76697	4.88957	5.27679e-05	0.00062523	1.37294
ENSG00000198805.7	1.08742	3.98153	4.78377	6.91867e-05	0.000759203	1.37011
ENSG00000080644.11	2.60307	-0.722277	4.66768	9.31593e-05	0.000943721	1.36404
ENSG00000113739.6	1.78006	-0.278464	4.64202	9.9493e-05	0.000990789	1.364
ENSG00000178568.9	-3.35994	-0.262433	-4.65475	9.62998e-05	0.000965126	1.35859
ENSG00000106511.5	-1.50037	3.45537	-4.72662	8.00978e-05	0.000836318	1.34879
ENSG00000090889.10	1.37154	3.46775	4.73177	7.9047e-05	0.000827362	1.34749
ENSG00000143028.7	-2.27077	-0.360311	-4.64571	9.85575e-05	0.000983178	1.34646
ENSG00000164920.5	-1.61564	3.7512	-4.74227	7.69486e-05	0.000811304	1.34594
ENSG00000184292.5	2.71407	4.86867	4.79704	6.68734e-05	0.000739945	1.34222
ENSG00000143970.12	0.341803	7.423	4.89989	5.13916e-05	0.000613848	1.33752
ENSG00000111341.5	-2.16955	5.56661	-4.84502	5.91419e-05	0.000680625	1.32698
ENSG00000169429.6	3.40111	-1.48659	4.72173	8.11071e-05	0.00084532	1.32451
ENSG00000132840.5	-1.39918	1.7088	-4.62577	0.000103727	0.00102407	1.32008
ENSG00000187955.7	-1.41305	7.53251	-4.89188	5.24566e-05	0.000622855	1.31873
ENSG00000178776.4	4.05336	0.83616	4.60927	0.000108208	0.00105921	1.31703
ENSG00000196532.4	2.0623	2.83706	4.66342	9.41831e-05	0.000949992	1.31397
ENSG00000121621.6	1.44976	2.6224	4.65958	9.51155e-05	0.00095686	1.31205
ENSG00000188015.5	1.76917	0.714743	4.60091	0.000110553	0.00107545	1.30083
ENSG00000100083.14	0.617972	6.66305	4.87769	5.43972e-05	0.00064057	1.29749
ENSG00000100938.13	-0.436967	4.78114	-4.81542	6.37992e-05	0.000716282	1.29413
ENSG00000198034.6	-0.76853	9.65168	-4.88318	5.36377e-05	0.000633793	1.29007
ENSG00000012048.15	0.736534	5.18074	4.82965	6.15156e-05	0.000699532	1.28643
ENSG00000112137.12	1.15935	3.76864	4.72781	7.98544e-05	0.000834282	1.28555
ENSG00000153922.6	0.358703	7.39987	4.87854	5.42783e-05	0.000639608	1.28334
ENSG00000206073.6	7.99078	1.6155	4.61258	0.000107295	0.00105266	1.28322
ENSG00000156219.12	-4.09819	1.00122	-4.5956	0.000112067	0.00108649	1.28261
ENSG00000154237.8	0.529131	6.52398	4.8696	5.55344e-05	0.000649081	1.28179
ENSG00000129353.10	-0.618706	7.0973	-4.87499	5.47742e-05	0.000643848	1.2797
ENSG00000234851.3	-0.614814	7.21856	-4.87466	5.48196e-05	0.000643848	1.27736
ENSG00000197043.9	-0.707391	7.18633	-4.87463	5.4825e-05	0.000643848	1.27725
ENSG00000138496.12	1.16262	6.99727	4.87211	5.51795e-05	0.00064581	1.27637
ENSG00000106785.10	0.777132	4.35128	4.77842	7.01418e-05	0.000766038	1.27496
ENSG00000119862.8	1.68015	4.31409	4.75688	7.41213e-05	0.000793898	1.27301
ENSG00000100802.10	-0.714273	4.01819	-4.74879	7.56739e-05	0.000803271	1.27274
ENSG00000163947.7	0.607744	4.85052	4.80717	6.51605e-05	0.000726993	1.26775
ENSG00000180626.9	-0.84771	5.25823	-4.8241	6.23956e-05	0.000707671	1.26138
ENSG00000161010.10	-0.649905	4.51319	-4.78448	6.90612e-05	0.000758792	1.26127
ENSG00000138311.11	1.61399	3.53599	4.69793	8.6209e-05	0.000888814	1.25852
ENSG00000102786.10	0.507618	7.06326	4.86575	5.6085e-05	0.00065256	1.25708
ENSG00000104888.5	-1.30551	1.95794	-4.60368	0.00010977	0.00107024	1.2562
ENSG00000167165.14	3.24968	1.23529	4.58186	0.000116086	0.00111416	1.2556
ENSG00000135378.3	1.49164	2.74205	4.64174	9.95655e-05	0.000990939	1.25355
ENSG00000044459.10	-0.660209	6.33218	-4.85484	5.76732e-05	0.000666395	1.25346
ENSG00000178498.11	-0.72978	4.51002	-4.78039	6.97885e-05	0.000763745	1.25006
ENSG00000146021.10	-0.818556	3.53966	-4.70293	8.5111e-05	0.000880474	1.24981
ENSG00000189090.7	5.16585	-0.552347	4.64787	9.80131e-05	0.000978314	1.24863
ENSG00000130489.8	1.34045	4.12454	4.74335	7.67364e-05	0.000809562	1.24853
ENSG00000110395.4	0.614554	5.92338	4.84333	5.93982e-05	0.000682663	1.24668
ENSG00000116679.11	0.541944	7.78446	4.8648	5.62211e-05	0.000653561	1.24485
ENSG00000264324.1	-0.833742	4.07278	-4.74346	7.67146e-05	0.000809562	1.24424
ENSG00000138316.6	1.71627	1.85735	4.59624	0.000111885	0.00108534	1.24413
ENSG00000051180.12	1.62584	0.798443	4.57629	0.000117756	0.00112492	1.24322
ENSG00000111666.6	-0.515686	5.99768	-4.84427	5.9255e-05	0.000681472	1.24221
ENSG00000107796.8	-1.52275	6.31306	-4.84581	5.90217e-05	0.000679697	1.24043
ENSG00000114209.10	0.555676	4.67023	4.7854	6.88986e-05	0.000757558	1.23803
ENSG00000101412.9	1.92287	1.83167	4.59792	0.000111402	0.00108187	1.2375
ENSG00000042317.12	-0.55082	4.58584	-4.77924	6.99946e-05	0.000765144	1.23567
ENSG00000103647.8	-1.37505	6.24393	-4.84306	5.94387e-05	0.000682673	1.23434
ENSG00000242372.2	0.554287	5.3978	4.82001	6.3054e-05	0.000711857	1.2283
ENSG00000049540.12	-1.72015	5.17567	-4.79718	6.68495e-05	0.000739945	1.22733
ENSG00000065457.6	0.664524	5.32823	4.81516	6.38413e-05	0.000716282	1.22711
ENSG00000257923.5	0.519119	8.16574	4.85829	5.71659e-05	0.000660975	1.2262
ENSG00000167778.4	-0.660146	4.7591	-4.78386	6.91705e-05	0.000759203	1.22578
ENSG00000100647.7	0.635759	4.52931	4.77076	7.15323e-05	0.000775802	1.22475
ENSG00000119508.13	2.49505	2.52491	4.61466	0.000106722	0.00104884	1.22356
ENSG00000005302.13	0.541014	6.08976	4.83863	6.0118e-05	0.000689556	1.22313
ENSG00000110697.8	0.577391	5.17194	4.80813	6.50011e-05	0.000725754	1.22242
ENSG00000094804.5	2.07143	2.0054	4.58516	0.000115108	0.00110973	1.21643
ENSG00000186660.14	0.403917	5.35717	4.81283	6.42232e-05	0.0007194	1.21349
ENSG00000173338.8	1.91201	1.35687	4.56919	0.000119917	0.00113481	1.20706
ENSG00000197930.8	0.807862	5.27686	4.8047	6.55743e-05	0.000729279	1.20491
ENSG00000123096.7	-1.13794	4.38623	-4.74994	7.54503e-05	0.000802381	1.20444
ENSG00000198211.8	3.10023	3.63067	4.65519	9.61916e-05	0.000964603	1.20199
ENSG00000168143.8	3.42129	5.31783	4.74612	7.61937e-05	0.000806383	1.20132
ENSG00000138190.12	0.791936	4.77585	4.77238	7.12352e-05	0.000774773	1.19809
ENSG00000188064.5	2.45892	0.152778	4.56302	0.000121831	0.0011482	1.19635
ENSG00000184731.5	2.79541	1.0722	4.55516	0.00012431	0.00116139	1.19345
ENSG00000173898.7	1.95289	6.86122	4.83132	6.12539e-05	0.000699326	1.18877
ENSG00000166582.5	-1.5941	1.51139	-4.56068	0.000122563	0.00114961	1.18593
ENSG00000176261.11	0.552702	3.81817	4.70092	8.55509e-05	0.000883087	1.18525
ENSG00000151287.12	0.735733	3.35475	4.66479	9.38521e-05	0.000948319	1.18466
ENSG00000001617.7	1.79874	4.40055	4.72383	8.06717e-05	0.00084129	1.18373
ENSG00000161944.12	1.86249	-0.0681042	4.56015	0.000122732	0.0011504	1.18245
ENSG00000099194.5	1.4024	5.99875	4.81504	6.38617e-05	0.000716282	1.18111
ENSG00000188910.7	3.28881	2.67975	4.59631	0.000111863	0.00108534	1.17948
ENSG00000170275.10	-0.718108	7.53098	-4.83677	6.04046e-05	0.000691463	1.17639
ENSG00000125285.4	2.70422	0.0904257	4.55567	0.000124149	0.00116052	1.17586
ENSG00000111452.8	-2.25198	2.88104	-4.61164	0.000107552	0.00105398	1.17586
ENSG00000174013.7	0.8887	3.48896	4.66747	9.32099e-05	0.000943721	1.17475
ENSG00000168734.9	-0.766096	3.45554	-4.66708	9.33021e-05	0.000943869	1.17378
ENSG00000187609.11	-0.984113	4.5791	-4.75117	7.5213e-05	0.000801174	1.1731
ENSG00000197614.6	-3.23537	1.40986	-4.54944	0.000126146	0.00117409	1.17138
ENSG00000144115.12	-0.846561	4.71574	-4.75806	7.3897e-05	0.000793702	1.17114
ENSG00000148948.3	-2.12532	1.42829	-4.55366	0.00012479	0.00116525	1.17094
ENSG00000053747.11	1.4133	6.38787	4.81889	6.3234e-05	0.000712489	1.16921
ENSG00000047365.7	1.25845	7.1498	4.83054	6.13757e-05	0.000699515	1.16864
ENSG00000142676.8	-0.661758	8.9768	-4.83578	6.0557e-05	0.000692746	1.16841
ENSG00000165953.5	5.90787	1.90464	4.54006	0.000129219	0.00119751	1.15819
ENSG00000075391.12	0.768932	5.8448	4.80426	6.56483e-05	0.000729279	1.15188
ENSG00000136122.11	0.809114	3.0069	4.62251	0.000104598	0.0010309	1.14944
ENSG00000164292.8	-1.13074	7.31329	-4.81957	6.31236e-05	0.000712177	1.13728
ENSG00000117691.5	-0.583279	5.22082	-4.77596	7.05844e-05	0.000769638	1.13727
ENSG00000134121.5	-1.3746	8.52898	-4.8212	6.28613e-05	0.000710613	1.13213
ENSG00000133639.3	-0.796455	7.08768	-4.81614	6.36819e-05	0.000715663	1.13135
ENSG00000141934.5	2.19559	2.2522	4.56108	0.000122438	0.00114961	1.13013
ENSG00000118181.6	-0.679764	8.31071	-4.82049	6.29757e-05	0.000711439	1.12995
ENSG00000153802.7	5.50932	-1.29352	4.59501	0.000112236	0.00108752	1.12398
ENSG00000184203.3	0.527672	4.7363	4.74351	7.67043e-05	0.000809562	1.12221
ENSG00000196331.5	2.58371	2.4836	4.57085	0.00011941	0.00113481	1.11913
ENSG00000187605.11	0.880736	6.68907	4.80696	6.51964e-05	0.000726993	1.11876
ENSG00000161057.6	0.479318	6.11093	4.79427	6.73507e-05	0.000742366	1.10731
ENSG00000117505.8	0.420958	5.2788	4.76509	7.2579e-05	0.000783945	1.10162
ENSG00000142082.10	-0.547862	4.02434	-4.68477	8.91675e-05	0.000911678	1.099
ENSG00000169604.15	-0.539675	7.33166	-4.80422	6.56554e-05	0.000729279	1.09532
ENSG00000183155.4	0.756185	4.01248	4.67531	9.13563e-05	0.000929163	1.09157
ENSG00000185664.10	1.47065	9.4333	4.8052	6.54913e-05	0.000729279	1.09132
ENSG00000126953.5	0.414178	4.34331	4.70563	8.45253e-05	0.000876174	1.08736
ENSG00000159337.6	4.43	2.04205	4.51389	0.000138183	0.00125825	1.08265
ENSG00000112936.14	-2.87737	2.83462	-4.5519	0.000125354	0.00116861	1.08163
ENSG00000141579.6	3.56342	4.91058	4.66737	9.32327e-05	0.000943721	1.08045
ENSG00000164938.9	0.822146	4.29343	4.6956	8.67253e-05	0.000891365	1.07813
ENSG00000139155.4	-1.78674	1.69435	-4.51648	0.000137269	0.00125125	1.07364
ENSG00000156463.13	2.8373	4.98473	4.69442	8.69892e-05	0.000892053	1.07258
ENSG00000216490.3	1.83023	5.04386	4.72532	8.03639e-05	0.000838588	1.07121
ENSG00000049283.13	3.06699	3.11737	4.56231	0.000122052	0.00114961	1.06741
ENSG00000139163.11	0.35836	5.82078	4.77146	7.14032e-05	0.000775802	1.06727
ENSG00000196616.8	-3.63004	3.47621	-4.55669	0.000123826	0.00115938	1.057
ENSG00000235169.3	-1.35726	-0.258312	-4.50882	0.000139992	0.00126936	1.05682
ENSG00000185915.4	-1.68532	0.806998	-4.49687	0.000144345	0.00129697	1.05629
ENSG00000104897.5	-0.609417	6.13998	-4.77373	7.09887e-05	0.000773557	1.05591
ENSG00000147614.3	4.91681	-1.22278	4.56979	0.000119735	0.00113481	1.05284
ENSG00000188042.5	1.11481	4.19657	4.67528	9.1363e-05	0.000929163	1.05281
ENSG00000181773.6	2.09884	-0.982717	4.53507	0.000130882	0.00120773	1.05278
ENSG00000136842.9	-1.4423	6.22842	-4.76896	7.18614e-05	0.000778144	1.05253
ENSG00000143321.14	0.357756	6.12172	4.77248	7.12175e-05	0.000774773	1.0521
ENSG00000115380.14	-1.51987	5.97176	-4.76164	7.32225e-05	0.00078941	1.05045
ENSG00000150510.11	0.991526	2.93962	4.57496	0.000118159	0.00112778	1.0478
ENSG00000166634.2	7.33302	0.9145	4.52084	0.000135744	0.00123932	1.04569
ENSG00000118508.4	0.896952	4.66524	4.70332	8.50258e-05	0.000880474	1.04209
ENSG00000110619.12	0.527515	5.63258	4.75379	7.47102e-05	0.000797959	1.03797
ENSG00000145675.10	-0.66716	7.40227	-4.78116	6.96511e-05	0.000762848	1.03627
ENSG00000081277.7	3.24433	6.77854	4.75531	7.44193e-05	0.000795958	1.03245
ENSG00000144668.7	-0.789094	5.80173	-4.75525	7.44305e-05	0.000795958	1.03124
ENSG00000068078.13	2.98854	4.65438	4.64526	9.86706e-05	0.000983737	1.03041
ENSG00000122729.14	-1.15962	5.63916	-4.74499	7.64147e-05	0.000807652	1.02812
ENSG00000186417.9	-1.26017	3.79407	-4.6276	0.000103241	0.00102045	1.02792
ENSG00000129295.4	-0.749806	2.51377	-4.5409	0.000128941	0.00119558	1.02731
ENSG00000171105.9	-0.726513	6.63099	-4.77082	7.15213e-05	0.000775802	1.02716
ENSG00000168907.9	3.80746	3.71176	4.5607	0.000122558	0.00114961	1.02669
ENSG00000004455.12	0.437063	6.39544	4.76629	7.23557e-05	0.000782254	1.02352
ENSG00000196793.9	-1.11598	2.55909	-4.53729	0.000130138	0.00120389	1.02265
ENSG00000156711.12	1.69402	3.97366	4.63292	0.000101841	0.00100719	1.02136
ENSG00000119125.12	6.85505	2.09282	4.48136	0.000150202	0.00133317	1.01999
ENSG00000132692.14	-2.7556	6.85914	-4.75811	7.38882e-05	0.000793702	1.01841
ENSG00000107929.10	0.333037	6.5451	4.76628	7.2358e-05	0.000782254	1.01628
ENSG00000186564.5	-1.63587	2.35944	-4.52371	0.000134748	0.00123284	1.01625
ENSG00000003249.9	1.49454	2.12868	4.51076	0.000139296	0.00126505	1.00852
ENSG00000126895.9	-2.09302	-0.220048	-4.48789	0.000147707	0.00131849	1.00622
ENSG00000244122.2	5.46193	0.00168639	4.5113	0.000139106	0.00126398	1.00407
ENSG00000131196.13	-0.753904	6.31756	-4.75681	7.41353e-05	0.000793898	1.00256
ENSG00000119682.12	0.427311	5.60955	4.73949	7.74978e-05	0.000814626	1.0024
ENSG00000214694.6	-0.983464	1.48133	-4.48433	0.000149062	0.00132587	1.0022
ENSG00000108839.7	3.19212	0.206765	4.47887	0.000151162	0.00133755	1.00201
ENSG00000171444.13	-0.652063	6.37436	-4.75713	7.40744e-05	0.000793898	1.0015
ENSG00000075415.8	-0.59793	7.88067	-4.76929	7.18011e-05	0.00077798	1.00121
ENSG00000048540.10	-3.67192	-0.979839	-4.53341	0.000131441	0.00120965	1.00104
ENSG00000214595.7	1.63288	3.28351	4.57365	0.000118554	0.00112925	0.99767
ENSG00000165863.12	-3.29319	-1.51039	-4.56963	0.000119784	0.00113481	0.994287
ENSG00000135723.9	0.48678	5.48258	4.73065	7.92742e-05	0.000828723	0.993811
ENSG00000152763.12	-0.931733	3.37451	-4.58281	0.000115804	0.00111394	0.99153
ENSG00000008952.12	-0.429098	6.48535	-4.75453	7.45682e-05	0.000796936	0.989379
ENSG00000223953.3	-1.18043	3.64624	-4.60459	0.000109515	0.00106873	0.986776
ENSG00000065911.7	0.795556	4.2632	4.653	9.67333e-05	0.000968179	0.98487
ENSG00000144848.6	0.50897	5.94273	4.74144	7.71124e-05	0.000812533	0.984297
ENSG00000171241.4	1.28979	3.21772	4.56127	0.000122379	0.00114961	0.984296
ENSG00000180332.5	3.89794	-0.543039	4.50449	0.000141555	0.0012815	0.983684
ENSG00000144445.11	-0.715766	6.25518	-4.74691	7.60398e-05	0.000805769	0.983043
ENSG00000141252.15	0.362485	6.51052	4.75185	7.50833e-05	0.000800951	0.98098
ENSG00000176476.4	-0.786428	3.73011	-4.6069	0.000108868	0.00106386	0.972016
ENSG00000151834.11	-3.0421	-1.3758	-4.55279	0.000125069	0.00116659	0.969488
ENSG00000183760.6	4.45163	1.15193	4.45693	0.000159906	0.00139416	0.964038
ENSG00000185345.14	-0.961417	3.22642	-4.56088	0.000122502	0.00114961	0.963551
ENSG00000144619.10	-1.7494	3.38342	-4.56319	0.000121777	0.0011482	0.961487
ENSG00000127080.5	1.06628	4.44021	4.6557	9.60657e-05	0.000963902	0.961173
ENSG00000068878.10	0.565559	7.23637	4.74905	7.56228e-05	0.000803224	0.956469
ENSG00000173175.10	-1.40721	2.14892	-4.48912	0.000147244	0.00131572	0.955255
ENSG00000101197.8	-1.77609	4.57898	-4.65574	9.6056e-05	0.000963902	0.955055
ENSG00000172954.9	0.479793	4.15133	4.6352	0.000101249	0.00100306	0.950304
ENSG00000071082.6	-0.726387	8.59932	-4.7497	7.54974e-05	0.000802387	0.949131
ENSG00000157933.9	-0.473476	6.60596	-4.73889	7.76189e-05	0.000815196	0.945135
ENSG00000066777.4	0.443757	8.39556	4.74802	7.58235e-05	0.000804364	0.944703
ENSG00000138796.11	-0.76388	4.66109	-4.66559	9.36601e-05	0.000946934	0.944668
ENSG00000115687.9	0.691158	5.42761	4.70754	8.41115e-05	0.000872847	0.944597
ENSG00000047648.17	-1.21935	3.47001	-4.56901	0.000119973	0.00113481	0.94445
ENSG00000159648.7	-2.1485	-0.937345	-4.48707	0.000148017	0.00131989	0.943878
ENSG00000176714.9	-0.899221	2.37877	-4.50028	0.00014309	0.00128931	0.943534
ENSG00000088002.7	3.58707	3.67438	4.53237	0.000131791	0.00121223	0.940549
ENSG00000129292.16	0.365558	7.10669	4.74114	7.71718e-05	0.000812662	0.938089
ENSG00000107438.4	0.89054	5.50578	4.70734	8.41536e-05	0.000872847	0.936981
ENSG00000182795.12	2.58164	3.88822	4.56856	0.000120114	0.00113512	0.934003
ENSG00000124212.5	-1.69745	3.59413	-4.56941	0.00011985	0.00113481	0.929815
ENSG00000111412.4	0.721077	3.61017	4.58015	0.000116596	0.00111844	0.929076
ENSG00000187323.7	-3.72907	-1.5825	-4.5357	0.000130669	0.00120669	0.928737
ENSG00000083845.4	-0.715691	8.07305	-4.74074	7.72513e-05	0.000813003	0.927597
ENSG00000136717.10	-0.884679	4.65365	-4.65937	9.51649e-05	0.00095686	0.926412
ENSG00000138271.4	3.06124	3.06182	4.50004	0.000143179	0.00128943	0.925867
ENSG00000075407.13	-0.636683	5.89638	-4.71679	8.21418e-05	0.000854385	0.924454
ENSG00000136159.3	0.773953	2.52312	4.49691	0.00014433	0.00129697	0.921601
ENSG00000135373.8	3.77407	3.70269	4.51673	0.000137183	0.00125125	0.920493
ENSG00000155463.8	-0.615343	7.10833	-4.73356	7.86849e-05	0.000825568	0.919341
ENSG00000164434.7	-2.47078	4.56166	-4.61371	0.000106983	0.0010508	0.915333
ENSG00000110422.7	-0.394703	8.38923	-4.73321	7.87561e-05	0.000825813	0.907029
ENSG00000008226.15	-0.902009	2.27463	-4.47734	0.000151755	0.00134005	0.906429
ENSG00000111319.8	2.83612	3.37467	4.53343	0.000131432	0.00120965	0.901381
ENSG00000177951.13	-0.516948	4.0824	-4.60966	0.000108099	0.00105874	0.89702
ENSG00000182749.5	0.63026	4.75607	4.65316	9.66922e-05	0.000968179	0.890009
ENSG00000074855.6	1.21908	5.06187	4.66289	9.43117e-05	0.000950733	0.887208
ENSG00000167196.9	0.574327	5.71237	4.69548	8.67521e-05	0.000891365	0.882761
ENSG00000172936.8	0.652161	4.58323	4.63665	0.000100874	0.00100165	0.878817
ENSG00000134463.10	-1.05388	3.44943	-4.54278	0.000128319	0.0011911	0.877116
ENSG00000185274.7	-2.9459	-0.136775	-4.42907	0.000171739	0.00147854	0.875722
ENSG00000126091.15	-0.702102	3.86135	-4.57882	0.000116995	0.00112032	0.872408
ENSG00000184216.7	0.564242	5.71349	4.6909	8.77758e-05	0.000899049	0.872244
ENSG00000092607.9	-1.14241	4.27015	-4.60302	0.000109956	0.00107145	0.86434
ENSG00000205978.5	-0.916618	6.43351	-4.7023	8.52478e-05	0.000881013	0.862304
ENSG00000120158.7	-0.700166	4.29826	-4.60705	0.000108827	0.00106386	0.862187
ENSG00000065371.13	2.06618	0.91336	4.41651	0.000177359	0.00151941	0.861785
ENSG00000197599.8	-1.52771	2.88342	-4.49014	0.000146857	0.00131295	0.85656
ENSG00000000003.10	-0.694	4.19901	-4.59919	0.000111042	0.00107959	0.852765
ENSG00000268061.1	-2.22091	-1.64797	-4.49615	0.000144613	0.00129697	0.849564
ENSG00000171291.4	0.855588	4.72401	4.63611	0.000101012	0.00100191	0.848559
ENSG00000168843.9	3.76615	0.336051	4.41285	0.000179029	0.00152907	0.83622
ENSG00000130255.8	-0.584744	7.78542	-4.70306	8.50822e-05	0.000880474	0.833385
ENSG00000148337.15	-0.481525	7.31197	-4.70105	8.55217e-05	0.000883087	0.833004
ENSG00000004866.14	0.580825	5.33396	4.65924	9.51973e-05	0.00095686	0.829051
ENSG00000132294.9	0.451343	6.86195	4.69531	8.67901e-05	0.000891365	0.826504
ENSG00000169570.5	0.890282	2.79175	4.47687	0.000151939	0.00134098	0.823629
ENSG00000102753.5	0.48477	5.26228	4.65284	9.6773e-05	0.000968179	0.820641
ENSG00000164180.9	0.501746	5.83123	4.67494	9.14428e-05	0.000929426	0.820493
ENSG00000140548.5	0.577805	4.68181	4.62075	0.000105071	0.00103497	0.817798
ENSG00000075643.5	1.28012	4.23381	4.5821	0.000116014	0.00111416	0.816545
ENSG00000165526.4	-0.766437	4.41927	-4.59829	0.000111296	0.00108145	0.812594
ENSG00000112200.12	0.400258	8.48407	4.69499	8.68601e-05	0.000891365	0.809555
ENSG00000105193.4	-0.682419	8.05121	-4.69177	8.75817e-05	0.000897595	0.803082
ENSG00000162383.7	-1.90116	-1.41008	-4.45075	0.000162457	0.00141283	0.797673
ENSG00000265681.2	-0.677102	8.8806	-4.68981	8.80226e-05	0.000901042	0.796489
ENSG00000099337.3	1.70548	2.75727	4.46939	0.000154879	0.00135927	0.796309
ENSG00000074527.7	-1.24288	4.485	-4.58755	0.000114405	0.00110357	0.791417
ENSG00000132313.10	0.464841	6.41437	4.67426	9.16021e-05	0.000930496	0.7884
ENSG00000138623.5	1.24002	3.81996	4.53589	0.000130606	0.00120669	0.782741
ENSG00000196177.8	-0.515871	4.0058	-4.55778	0.00012348	0.00115677	0.782036
ENSG00000137413.11	0.484904	6.08197	4.66435	9.39593e-05	0.000948846	0.779666
ENSG00000120907.13	-4.87284	-0.106784	-4.41182	0.000179502	0.00153016	0.777632
ENSG00000084754.6	-0.408336	7.56861	-4.6805	9.01488e-05	0.000919529	0.777237
ENSG00000116044.11	0.362078	8.16592	4.68202	8.97978e-05	0.000917476	0.777024
ENSG00000131398.9	1.13804	2.49562	4.43278	0.000170115	0.0014661	0.774321
ENSG00000188643.6	1.24001	5.20866	4.62605	0.000103652	0.00102392	0.769796
ENSG00000267160.1	1.08623	2.46458	4.42821	0.00017212	0.00147968	0.767744
ENSG00000177045.6	-0.648102	3.96503	-4.54789	0.000126649	0.00117814	0.767731
ENSG00000158769.13	1.06757	4.29774	4.56888	0.000120015	0.00113481	0.766584
ENSG00000077684.11	-0.992314	6.28669	-4.66017	9.49697e-05	0.000956246	0.764313
ENSG00000141429.9	0.476676	6.6775	4.66838	9.29934e-05	0.00094296	0.76386
ENSG00000166816.9	-2.24074	1.75942	-4.3927	0.000188515	0.00158581	0.760778
ENSG00000227051.4	-1.46519	1.32345	-4.38019	0.000194654	0.00162474	0.7602
ENSG00000205076.4	4.26947	2.95073	4.40604	0.00018218	0.00154459	0.757547
ENSG00000124693.2	2.01396	3.72449	4.4961	0.000144632	0.00129697	0.754108
ENSG00000138594.8	0.523675	5.88906	4.64848	9.78598e-05	0.00097735	0.750986
ENSG00000189280.3	3.10747	2.11461	4.38987	0.000189886	0.00159345	0.749564
ENSG00000178934.4	3.61471	5.1779	4.54956	0.00012611	0.00117409	0.748826
ENSG00000007314.7	-2.81952	0.180198	-4.36646	0.000201619	0.00166995	0.746139
ENSG00000114757.14	-4.97612	-0.689777	-4.41525	0.000177932	0.00152281	0.743435
ENSG00000184182.14	0.69036	4.27246	4.56138	0.000122345	0.00114961	0.743386
ENSG00000115233.7	0.62267	4.49992	4.57741	0.000117419	0.00112258	0.742988
ENSG00000075651.11	1.10449	5.64791	4.6335	0.00010169	0.00100685	0.741928
ENSG00000087916.7	5.6539	0.650267	4.36917	0.000200222	0.00165966	0.739694
ENSG00000163293.7	2.43373	2.70518	4.42087	0.000175387	0.00150402	0.737759
ENSG00000164695.4	2.79994	1.17196	4.36553	0.000202099	0.00167151	0.736702
ENSG00000148700.9	-0.759575	7.4648	-4.66384	9.40805e-05	0.000949513	0.736534
ENSG00000137709.5	3.11604	2.70466	4.40701	0.000181729	0.00154304	0.736189
ENSG00000232629.4	1.49738	3.46734	4.4843	0.000149072	0.00132587	0.735468
ENSG00000091428.13	1.75226	4.46808	4.55313	0.000124959	0.00116619	0.733914
ENSG00000137821.7	-0.776435	3.24053	-4.47171	0.000153962	0.00135261	0.733596
ENSG00000175416.8	1.07103	5.92372	4.64042	9.9902e-05	0.00099314	0.733338
ENSG00000185798.6	0.704745	3.5863	4.50085	0.00014288	0.00128809	0.732676
ENSG00000163362.6	2.93295	3.14014	4.4289	0.000171815	0.00147854	0.730194
ENSG00000261760.2	1.40847	2.09337	4.39393	0.000187921	0.00158236	0.721843
ENSG00000221818.4	-2.27126	1.24025	-4.35921	0.000205398	0.00168826	0.721223
ENSG00000197343.6	0.524925	7.86113	4.65797	9.55072e-05	0.000959416	0.717411
ENSG00000151575.10	-0.585856	3.38457	-4.47788	0.000151547	0.00133958	0.715745
ENSG00000163600.8	2.35098	1.2224	4.35418	0.00020806	0.00170202	0.714789
ENSG00000170624.9	-1.38934	5.79985	-4.6254	0.000103826	0.00102446	0.713909
ENSG00000158301.14	-0.613669	4.88062	-4.59046	0.000113555	0.00109844	0.712226
ENSG00000014257.11	2.5388	4.26221	4.50912	0.000139883	0.00126904	0.709838
ENSG00000187266.9	-0.747064	3.66935	-4.49749	0.000144118	0.00129653	0.703244
ENSG00000170185.5	0.430225	6.45788	4.6415	9.96265e-05	0.000990973	0.702524
ENSG00000182544.8	0.74323	5.19965	4.60214	0.000110205	0.00107326	0.700156
ENSG00000214435.3	-2.64863	0.747436	-4.34343	0.000213865	0.00173714	0.699323
ENSG00000126016.9	-0.964909	4.66436	-4.56776	0.000120358	0.0011368	0.696884
ENSG00000179772.6	-2.50539	0.876433	-4.34367	0.000213737	0.00173692	0.695547
ENSG00000034152.14	0.697713	4.71377	4.57285	0.000118798	0.00113074	0.69215
ENSG00000142677.3	2.49636	3.52085	4.44757	0.00016379	0.0014237	0.691661
ENSG00000146285.9	2.22174	2.76935	4.40748	0.000181508	0.00154192	0.691127
ENSG00000176046.7	-0.766641	5.06426	-4.58988	0.000113724	0.00109946	0.688642
ENSG00000164061.4	-0.884616	4.37461	-4.54245	0.000128427	0.00119146	0.688207
ENSG00000078687.12	-0.573393	7.23874	-4.64363	9.90847e-05	0.000987294	0.687542
ENSG00000130340.10	0.541842	6.46073	4.63583	0.000101086	0.00100202	0.68748
ENSG00000141526.10	1.52347	3.49626	4.46632	0.000156104	0.00136585	0.686734
ENSG00000079616.8	0.587157	5.00661	4.58778	0.000114337	0.00110352	0.686732
ENSG00000133710.11	4.79767	6.42576	4.56898	0.000119983	0.00113481	0.686607
ENSG00000149451.13	-1.47635	4.98636	-4.57359	0.000118575	0.00112925	0.679708
ENSG00000185432.10	-1.0348	4.23608	-4.52707	0.000133593	0.00122487	0.677197
ENSG00000128245.10	0.617961	6.03639	4.62282	0.000104515	0.00103067	0.676358
ENSG00000103591.8	0.643514	4.23987	4.53414	0.000131193	0.00120931	0.673713
ENSG00000131471.2	-1.54941	3.88845	-4.48732	0.000147924	0.00131975	0.672119
ENSG00000095585.12	1.17734	3.62608	4.47205	0.000153828	0.00135211	0.66687
ENSG00000101844.13	0.533103	3.47844	4.46913	0.000154985	0.00135951	0.665925
ENSG00000235954.2	-0.744319	1.70841	-4.35598	0.000207104	0.00169743	0.665259
ENSG00000022567.5	0.793276	4.48246	4.54519	0.00012753	0.00118505	0.664589
ENSG00000102572.10	-0.571793	7.55982	-4.6361	0.000101017	0.00100191	0.664539
ENSG00000150556.12	3.28304	0.239378	4.33041	0.000221118	0.00177761	0.6619
ENSG00000165617.10	-1.75122	3.22776	-4.43518	0.000169073	0.00145858	0.661731
ENSG00000196139.7	-1.25517	3.19055	-4.43759	0.000168033	0.00145179	0.660748
ENSG00000122420.5	-1.46864	4.02414	-4.49221	0.00014608	0.00130804	0.655993
ENSG00000152784.11	-1.01701	2.81857	-4.41003	0.000180328	0.00153493	0.653672
ENSG00000181652.14	3.58417	3.86112	4.42312	0.000174378	0.00149611	0.645711
ENSG00000127990.11	-1.5735	5.54546	-4.58852	0.000114121	0.0011025	0.644673
ENSG00000121068.9	-1.44445	6.18018	-4.60695	0.000108854	0.00106386	0.643189
ENSG00000130487.4	2.83646	1.82952	4.34532	0.000212836	0.00173122	0.642894
ENSG00000159479.12	0.501635	5.07175	4.57466	0.000118249	0.00112801	0.64212
ENSG00000035681.3	0.363576	6.15911	4.61211	0.000107424	0.00105333	0.641749
ENSG00000119411.10	2.48849	1.8841	4.34975	0.000210436	0.0017182	0.6406
ENSG00000145029.7	-0.607809	3.8761	-4.4889	0.000147324	0.00131576	0.638453
ENSG00000172500.8	0.544878	5.09629	4.57425	0.000118374	0.00112858	0.636584
ENSG00000096872.11	-0.557298	4.35181	-4.52291	0.000135025	0.00123434	0.635122
ENSG00000196369.6	0.525846	5.58405	4.59227	0.000113028	0.00109457	0.633168
ENSG00000122873.7	0.906729	3.36526	4.43872	0.000167545	0.00145048	0.632508
ENSG00000006740.12	-1.18274	1.67958	-4.33714	0.000217338	0.0017546	0.631746
ENSG00000155100.6	0.462956	4.05815	4.5025	0.00014228	0.00128477	0.63097
ENSG00000164841.4	-2.21395	-1.37517	-4.35944	0.000205277	0.00168807	0.63074
ENSG00000163191.5	1.08533	7.12948	4.61897	0.000105551	0.00103911	0.629968
ENSG00000092470.7	0.631086	4.35714	4.52282	0.000135055	0.00123434	0.629518
ENSG00000144712.7	-0.974628	2.8205	-4.40645	0.000181987	0.00154376	0.629255
ENSG00000253598.1	1.03403	1.39382	4.32612	0.000223559	0.00178806	0.62825
ENSG00000165181.12	3.44405	0.652994	4.31285	0.000231285	0.00183027	0.627848
ENSG00000161798.6	3.69951	-1.07062	4.35187	0.000209293	0.00171048	0.624184
ENSG00000106049.4	-0.798979	5.55034	-4.58449	0.000115307	0.00111066	0.61945
ENSG00000019549.4	-1.15473	7.03013	-4.61296	0.000107189	0.00105222	0.6173
ENSG00000164045.7	2.60517	0.022792	4.31	0.000232979	0.00183949	0.61407
ENSG00000034677.7	0.660146	7.39212	4.61532	0.000106543	0.00104767	0.613801
ENSG00000187764.7	0.923698	5.75208	4.58836	0.000114166	0.0011025	0.612224
ENSG00000196743.4	0.754762	8.0675	4.61648	0.000106226	0.00104515	0.611147
ENSG00000128285.4	4.60566	0.285146	4.31294	0.000231229	0.00183027	0.609415
ENSG00000153879.4	0.775315	3.87276	4.47447	0.000152877	0.0013472	0.609145
ENSG00000166224.12	0.590421	5.58794	4.58204	0.000116031	0.00111416	0.607742
ENSG00000164039.10	-0.701803	5.31501	-4.5693	0.000119884	0.00113481	0.604566
ENSG00000165275.5	-0.618617	3.12015	-4.41229	0.000179285	0.00152907	0.603833
ENSG00000101084.12	0.794175	4.85456	4.54639	0.000127137	0.00118204	0.601766
ENSG00000166292.7	-1.90931	-0.0131446	-4.3034	0.000236945	0.00186312	0.59905
ENSG00000189159.11	1.14719	3.85419	4.46674	0.000155934	0.00136506	0.59753
ENSG00000150165.13	3.36521	2.94427	4.35664	0.000206754	0.00169536	0.596908
ENSG00000143786.3	2.07441	2.7274	4.37297	0.000198284	0.00164946	0.592384
ENSG00000139874.5	-2.35776	-1.59483	-4.37176	0.000198899	0.00165299	0.589431
ENSG00000204267.9	1.04438	7.28008	4.60445	0.000109553	0.00106873	0.588592
ENSG00000102362.11	-1.45038	2.55582	-4.35767	0.000206206	0.00169168	0.58778
ENSG00000105699.12	1.35348	4.30483	4.49593	0.000144694	0.00129697	0.587553
ENSG00000169992.5	-0.624324	5.71558	-4.57863	0.000117053	0.00112032	0.586919
ENSG00000118655.4	0.613316	3.90651	4.47148	0.000154051	0.0013527	0.586552
ENSG00000126351.8	-0.788692	5.92845	-4.58293	0.000115768	0.00111394	0.585163
ENSG00000132613.10	-1.07675	7.17569	-4.60175	0.000110313	0.00107372	0.584614
ENSG00000067992.8	0.692236	4.48198	4.51154	0.000139021	0.00126388	0.582681
ENSG00000064393.11	-1.36175	8.66267	-4.60452	0.000109535	0.00106873	0.580049
ENSG00000102471.9	0.713597	4.92877	4.53756	0.000130048	0.00120389	0.577849
ENSG00000187676.7	0.632785	4.01991	4.47609	0.000152244	0.00134299	0.577417
ENSG00000183801.3	-1.01894	3.93129	-4.4656	0.000156393	0.00136768	0.577349
ENSG00000181856.10	-1.89839	-0.0738397	-4.29323	0.000243193	0.00189924	0.576534
ENSG00000003436.10	-1.00284	4.12416	-4.48065	0.000150473	0.0013342	0.575974
ENSG00000204850.3	-1.16711	1.02945	-4.29462	0.000242327	0.00189624	0.57483
ENSG00000180354.11	-1.23716	3.66731	-4.43809	0.000167818	0.00145179	0.573632
ENSG00000133612.14	0.464239	6.53297	4.59123	0.000113329	0.00109688	0.571984
ENSG00000152268.8	-1.4774	5.81571	-4.56963	0.000119784	0.00113481	0.570771
ENSG00000164088.13	-0.515008	4.15961	-4.48438	0.000149044	0.00132587	0.562968
ENSG00000164975.11	-0.393574	5.50151	-4.56062	0.000122582	0.00114961	0.561928
ENSG00000165841.5	4.3276	-0.531069	4.31462	0.00023024	0.00182455	0.561713
ENSG00000166821.4	-1.07363	2.45506	-4.34702	0.000211908	0.00172694	0.560807
ENSG00000173698.13	2.55533	2.98804	4.3614	0.000204249	0.00168436	0.558009
ENSG00000111247.10	1.56204	1.22021	4.29655	0.000241138	0.00189005	0.556718
ENSG00000196275.9	-0.808599	4.78878	-4.52212	0.000135298	0.0012359	0.55575
ENSG00000086717.14	2.27196	0.0103271	4.27963	0.000251805	0.0019541	0.549406
ENSG00000106086.14	0.614192	6.57551	4.5822	0.000115985	0.00111416	0.54917
ENSG00000159176.9	-0.664388	6.8217	-4.5844	0.000115334	0.00111066	0.546162
ENSG00000184995.6	3.64965	-2.48957	4.36555	0.00020209	0.00167151	0.546131
ENSG00000171310.6	1.11487	4.92961	4.52523	0.000134224	0.00122935	0.539271
ENSG00000162373.8	-0.963214	2.55969	-4.34294	0.000214138	0.00173853	0.539108
ENSG00000169282.13	-2.3039	0.350672	-4.27211	0.000256695	0.00198311	0.534755
ENSG00000142273.6	2.90944	2.0985	4.29862	0.00023986	0.0018826	0.532295
ENSG00000140044.8	-0.657741	3.42427	-4.41267	0.000179111	0.00152907	0.530498
ENSG00000132749.6	-0.847769	2.30852	-4.32777	0.000222616	0.00178311	0.530462
ENSG00000161888.7	1.80034	0.0451418	4.27087	0.000257514	0.00198499	0.530327
ENSG00000070526.10	1.65789	0.57617	4.27169	0.00025697	0.00198358	0.529923
ENSG00000127329.10	-0.696352	6.07691	-4.56503	0.000121204	0.00114354	0.529506
ENSG00000117479.8	0.824797	5.45372	4.54319	0.000128184	0.00119049	0.529102
ENSG00000141646.9	-0.365966	6.37178	-4.57148	0.000119218	0.00113412	0.528349
ENSG00000203791.9	-0.515209	4.19438	-4.46821	0.000155348	0.001362	0.527242
ENSG00000203811.1	1.92696	3.00864	4.35477	0.000207747	0.00170027	0.526766
ENSG00000203852.3	1.92696	3.00864	4.35477	0.000207747	0.00170027	0.526766
ENSG00000100890.11	0.436425	5.25	4.53715	0.000130186	0.00120389	0.526755
ENSG00000166510.9	-2.30189	1.10164	-4.27349	0.000255794	0.00197793	0.526484
ENSG00000111669.10	0.529503	6.76632	4.57616	0.000117794	0.00112492	0.525982
ENSG00000143486.11	-0.679086	5.80789	-4.55601	0.000124039	0.00116012	0.524069
ENSG00000170832.8	0.412008	7.27884	4.57895	0.000116954	0.00112032	0.52234
ENSG00000133808.4	2.25845	3.33216	4.36927	0.000200171	0.00165966	0.520698
ENSG00000153044.5	0.823152	2.13879	4.31133	0.000232186	0.00183491	0.520225
ENSG00000178726.6	1.3474	4.71318	4.49609	0.000144636	0.00129697	0.518245
ENSG00000152642.6	-0.706451	4.23953	-4.46782	0.000155506	0.00136269	0.51661
ENSG00000170464.5	-0.836108	3.42795	-4.40467	0.00018282	0.00154848	0.516517
ENSG00000164393.4	3.05365	0.515074	4.26403	0.000262059	0.00201193	0.516258
ENSG00000229124.2	-1.17855	4.07809	-4.44485	0.000164932	0.00143291	0.515798
ENSG00000161970.8	-0.656828	8.50684	-4.57941	0.000116816	0.00111993	0.515714
ENSG00000117399.9	2.14362	2.35352	4.30946	0.000233299	0.00184047	0.515594
ENSG00000188846.9	-0.634359	8.46546	-4.57807	0.000117221	0.00112131	0.512284
ENSG00000139291.9	0.68951	4.75816	4.5017	0.000142569	0.00128663	0.510958
ENSG00000170323.4	-2.16708	0.832072	-4.26247	0.000263101	0.00201454	0.509782
ENSG00000122952.12	1.24891	2.49926	4.32283	0.000225451	0.00179568	0.5044
ENSG00000203705.6	-0.652448	3.97392	-4.44322	0.000165623	0.00143746	0.50317
ENSG00000250479.4	-0.862838	4.53338	-4.48215	0.000149897	0.00133115	0.501486
ENSG00000121270.11	-1.83897	2.14681	-4.29726	0.0002407	0.00188748	0.501106
[truncated: 15,229 more rows]

## Sheet: miRNA
	logFC	AveExpr	t	P.Value	adj.P.Val	B
hsa-miR-21-5p	2.40241	14.2554	7.31487	1.66776e-07	8.60563e-05	7.45131
hsa-miR-328-3p	-1.69028	9.663	-6.61708	8.40142e-07	0.000216757	5.89873
hsa-miR-125b-5p	-2.1775	10.3062	-6.41779	1.34806e-06	0.000231866	5.44485
hsa-miR-3656	-4.12713	4.22294	-5.22341	2.50278e-05	0.00322858	2.59338
hsa-miR-107	1.50183	9.29139	4.87397	6.00894e-05	0.00550086	1.83712
hsa-miR-100-5p	-1.97158	7.04732	-4.77074	7.79125e-05	0.00550086	1.62454
hsa-miR-93-5p	1.50518	9.85992	4.6658	0.000101489	0.00550086	1.32211
hsa-miR-103a-3p	1.18052	13.131	4.69381	9.45721e-05	0.00550086	1.29825
hsa-miR-125a-5p	-1.36802	10.6736	-4.65481	0.000104338	0.00550086	1.25265
hsa-miR-550a-3p	2.5718	3.69205	4.63579	0.000109463	0.00550086	1.21261
hsa-miR-27a-5p	2.62276	5.01223	4.60847	0.000117266	0.00550086	1.18981
hsa-miR-196b-5p	3.37573	6.20709	4.50827	0.000150974	0.00649187	1.00773
hsa-miR-574-3p	-1.57213	8.69947	-4.39018	0.000203337	0.00698364	0.67007
hsa-miR-423-5p	-1.19819	10.3205	-4.40253	0.000197105	0.00698364	0.651174
hsa-miR-340-5p	1.84492	6.24837	4.30268	0.000253509	0.00698364	0.554058
hsa-miR-211-3p	-1.40684	7.27722	-4.31676	0.000244675	0.00698364	0.544072
hsa-miR-16-5p	1.07692	13.489	4.381	0.000208096	0.00698364	0.5253
hsa-miR-193b-5p	-1.7694	5.4626	-4.28973	0.000261922	0.00698364	0.5248
hsa-let-7d-3p	-1.26929	9.84513	-4.30372	0.000252849	0.00698364	0.428922
hsa-miR-450b-5p	2.47675	1.97923	4.27666	0.000270684	0.00698364	0.413033
hsa-miR-146b-5p	1.66309	8.83509	4.21497	0.00031618	0.00776899	0.28322
hsa-miR-9-5p	4.64648	6.29085	4.12466	0.000396826	0.0085022	0.141468
hsa-miR-7-5p	2.98798	6.70208	4.10332	0.000418682	0.0085022	0.103177
hsa-let-7c-5p	-1.40085	12.8423	-4.19126	0.000335618	0.00787176	0.0656763
hsa-miR-31-5p	3.29679	8.32199	4.09419	0.000428405	0.0085022	0.0376319
hsa-miR-203a	2.94871	11.4121	4.13661	0.000385077	0.0085022	-0.000602882
hsa-miR-148b-3p	1.6214	7.25884	4.02253	0.000512833	0.00976435	-0.109473
hsa-miR-106b-5p	1.84807	6.70671	4.00952	0.000529848	0.00976435	-0.119011
hsa-miR-454-3p	2.03023	6.28171	3.92918	0.000647982	0.0114609	-0.288686
hsa-miR-432-5p	-1.50779	6.16107	-3.91802	0.000666331	0.0114609	-0.342616
hsa-miR-509-5p	1.79255	7.22979	3.88274	0.000727777	0.012114	-0.432829
hsa-miR-4423-5p	2.8627	3.31683	3.75967	0.000989194	0.0141785	-0.66794
hsa-miR-22-3p	1.0465	11.3886	3.85663	0.000776822	0.0125263	-0.677574
hsa-miR-27a-3p	1.08438	11.6373	3.80073	0.000893062	0.0137558	-0.814377
hsa-miR-506-5p	1.96642	2.7451	3.68923	0.00117839	0.0163342	-0.824921
hsa-miR-218-1-3p	-2.83776	2.36995	-3.68093	0.0012029	0.0163342	-0.845137
hsa-miR-221-3p	1.24034	12.2945	3.79478	0.000906392	0.0137558	-0.85183
hsa-miR-628-5p	2.47193	3.51755	3.66676	0.00124593	0.0164846	-0.867106
hsa-miR-211-5p	-1.24421	14.215	-3.76155	0.000984581	0.0141785	-1.01465
hsa-miR-363-3p	2.80177	3.59425	3.57841	0.00155022	0.0186026	-1.05287
hsa-miR-6507-5p	-2.51592	1.64859	-3.58057	0.00154196	0.0186026	-1.06126
hsa-miR-17-5p	1.20278	8.92963	3.62712	0.00137441	0.0177299	-1.1119
hsa-miR-6511b-3p	-1.69686	4.95346	-3.55427	0.00164528	0.0191521	-1.11651
hsa-miR-1468-5p	-2.1496	2.76252	-3.54816	0.00167024	0.0191521	-1.12262
hsa-miR-20a-5p	1.30202	8.36598	3.59923	0.00147252	0.0185322	-1.14547
hsa-miR-142-5p	2.21769	7.59747	3.5035	0.00186431	0.0208537	-1.30192
hsa-miR-660-5p	1.28985	7.16232	3.49589	0.00189947	0.0208537	-1.30948
hsa-miR-185-5p	1.1574	7.65205	3.43905	0.00218363	0.0229949	-1.46954
hsa-miR-190b	1.95055	2.6082	3.37395	0.00256009	0.0259021	-1.4824
hsa-miR-139-3p	-1.45027	4.91089	-3.35368	0.00268972	0.0263983	-1.55891
hsa-miR-6087	-1.41487	7.60683	-3.40543	0.00237075	0.0244661	-1.59796
hsa-miR-6747-3p	-2.40386	2.16795	-3.25715	0.00339952	0.0323872	-1.72205
hsa-miR-98-5p	1.19704	10.6592	3.35037	0.00271146	0.0263983	-1.82267
hsa-let-7b-5p	-0.867998	16.0069	-3.44492	0.00215243	0.0229949	-1.82643
hsa-miR-106a-5p	1.946	4.68507	3.19627	0.00393727	0.0356427	-1.85675
hsa-miR-106b-3p	1.03204	8.06287	3.24522	0.00349898	0.0323872	-1.9373
hsa-miR-589-5p	1.70797	2.60963	3.14498	0.00445313	0.0382266	-1.94856
hsa-miR-128-3p	0.89964	9.01943	3.24334	0.00351489	0.0323872	-1.9968
hsa-miR-194-5p	2.29971	4.56504	3.11253	0.00481259	0.0400532	-2.02676
hsa-miR-1260a	-2.07334	4.40391	-3.10275	0.00492634	0.040349	-2.07847
hsa-miR-4510	-1.6901	3.75622	-3.06606	0.0053763	0.0426795	-2.1201
hsa-miR-132-5p	1.68295	3.39964	3.05952	0.00546058	0.0426918	-2.12417
hsa-miR-214-3p	-1.24705	8.46256	-3.17036	0.00419024	0.0372787	-2.1722
hsa-miR-15a-5p	1.21734	8.68718	3.13885	0.00451904	0.0382266	-2.20006
hsa-miR-296-5p	-1.65802	4.86577	-3.04165	0.0056974	0.0438785	-2.21922
hsa-miR-4532	-2.21722	2.2033	-2.99836	0.00631228	0.046157	-2.23802
hsa-miR-20b-5p	2.39365	4.35575	2.98951	0.0064456	0.046157	-2.27396
hsa-miR-25-3p	0.800917	11.3918	3.14188	0.00448636	0.0382266	-2.33402
hsa-miR-141-3p	2.33236	6.12411	2.98283	0.00654814	0.046157	-2.35715
hsa-miR-200a-3p	2.02873	5.89428	2.97824	0.00661941	0.046157	-2.36361
hsa-miR-151a-3p	1.01848	7.13586	2.99851	0.00631008	0.046157	-2.40787
hsa-miR-708-5p	1.81729	6.11455	2.94129	0.00722082	0.0490255	-2.45293
hsa-miR-181a-3p	1.17809	5.8092	2.9286	0.00743901	0.049851	-2.46487
hsa-let-7a-2-3p	-1.86147	1.34627	-2.87595	0.00841392	0.0542698	-2.47528
hsa-miR-320a	-0.720939	12.641	-3.08667	0.00511888	0.0412709	-2.51821
hsa-miR-30d-3p	1.97225	3.50744	2.84513	0.00903973	0.0572726	-2.54901
hsa-miR-30e-5p	0.884037	9.29182	2.99326	0.0063889	0.046157	-2.56332
hsa-miR-2110	-1.31135	5.12277	-2.8422	0.00910146	0.0572726	-2.63651
hsa-miR-505-3p	-1.44246	4.62114	-2.82554	0.00946043	0.0588143	-2.64585
hsa-miR-24-3p	0.748985	14.2273	3.00766	0.00617502	0.046157	-2.74294
hsa-miR-382-3p	-1.74914	2.30499	-2.73034	0.0117816	0.0715213	-2.7543
hsa-miR-6777-5p	-2.00685	2.56588	-2.72251	0.0119948	0.0719685	-2.77133
hsa-miR-654-5p	-1.56015	2.87497	-2.70786	0.0124034	0.0735651	-2.80406
hsa-miR-30d-5p	0.826776	13.504	2.95407	0.00700712	0.048209	-2.83038
hsa-miR-514a-3p	1.16634	8.70908	2.81881	0.00960913	0.0590275	-2.89874
hsa-miR-425-3p	1.40377	4.86574	2.66668	0.0136236	0.0789863	-2.92916
hsa-miR-27b-3p	0.772015	12.996	2.895	0.00804789	0.0532399	-2.9415
hsa-miR-7-1-3p	1.46187	3.6722	2.63856	0.0145203	0.0819442	-2.94658
hsa-miR-4488	-2.09539	3.04444	-2.63584	0.0146102	0.0819442	-2.95278
hsa-miR-3173-5p	-1.76202	2.88313	-2.60989	0.0154919	0.0838147	-2.99211
hsa-miR-181a-5p	0.743256	14.0948	2.87639	0.00840533	0.0542698	-3.02415
hsa-miR-22-5p	1.34745	4.89866	2.61146	0.0154371	0.0838147	-3.04734
hsa-miR-30e-3p	1.14759	6.4632	2.65962	0.0138435	0.0793696	-3.05028
hsa-miR-590-3p	1.70046	3.80935	2.57065	0.0169201	0.0881897	-3.0771
hsa-miR-6803-3p	-1.6855	0.993203	-2.52665	0.0186672	0.0916346	-3.13088
hsa-miR-485-3p	-1.32778	4.81351	-2.57889	0.0166102	0.0874579	-3.15666
hsa-miR-873-3p	-1.56327	2.99476	-2.51618	0.0191072	0.0921431	-3.16012
hsa-miR-676-3p	-1.5872	1.57613	-2.48945	0.0202742	0.0951047	-3.19635
hsa-miR-542-3p	1.70298	2.24267	2.49224	0.0201496	0.0951047	-3.20057
hsa-miR-598-3p	1.48242	3.25042	2.49754	0.0199141	0.0951047	-3.20273
hsa-miR-130b-3p	1.57189	5.77604	2.5525	0.0176215	0.0888013	-3.206
hsa-miR-302e	-1.67983	1.6116	-2.48073	0.0206688	0.0956966	-3.21203
hsa-miR-95-3p	1.85115	5.5428	2.52289	0.0188242	0.0916346	-3.23683
hsa-miR-155-5p	1.94812	10.3546	2.69347	0.0128176	0.0751578	-3.24163
hsa-miR-92a-1-5p	-1.1679	5.738	-2.56417	0.0171673	0.088583	-3.24804
hsa-miR-200a-5p	1.79331	2.2722	2.46107	0.0215854	0.0956966	-3.26201
hsa-miR-6716-3p	-1.56193	1.14298	-2.45099	0.0220696	0.0956966	-3.26667
hsa-miR-345-5p	1.21689	6.47258	2.55216	0.0176349	0.0888013	-3.2754
hsa-miR-18a-5p	1.34546	3.76162	2.46263	0.0215115	0.0956966	-3.27633
hsa-miR-301a-3p	1.37197	3.68696	2.45827	0.0217188	0.0956966	-3.28331
hsa-miR-26b-3p	1.44567	4.22572	2.45998	0.0216371	0.0956966	-3.29068
hsa-miR-6734-5p	-1.6816	1.40846	-2.42998	0.0231119	0.099381	-3.30321
hsa-miR-340-3p	1.18306	4.48419	2.45222	0.0220101	0.0956966	-3.32147
hsa-miR-501-3p	1.32018	2.38208	2.4231	0.0234625	0.100055	-3.32415
hsa-miR-193a-5p	-0.817158	7.55411	-2.59223	0.0161201	0.085752	-3.33497
hsa-miR-1304-3p	1.33665	1.87537	2.41444	0.0239114	0.101133	-3.33561
hsa-let-7b-3p	-0.893575	6.3898	-2.5273	0.0186404	0.0916346	-3.36733
hsa-miR-15b-3p	1.50533	2.46132	2.3969	0.0248446	0.103386	-3.37437
hsa-miR-146b-3p	1.54283	3.30982	2.39755	0.0248097	0.103386	-3.38739
hsa-miR-27b-5p	0.9009	6.42485	2.47585	0.0208929	0.0956966	-3.4237
hsa-miR-532-3p	-0.754972	7.90414	-2.54986	0.0177258	0.0888013	-3.43643
hsa-miR-511-5p	1.84424	5.07233	2.39054	0.0251911	0.103989	-3.44914
hsa-miR-769-3p	1.37541	3.73994	2.36405	0.0266837	0.105377	-3.45591
hsa-let-7i-3p	1.5273	3.49404	2.35934	0.026957	0.105377	-3.45886
hsa-miR-34c-5p	2.0757	3.99131	2.36045	0.0268924	0.105377	-3.46258
hsa-miR-374b-5p	0.992649	6.73651	2.4515	0.0220449	0.0956966	-3.487
hsa-miR-4492	-1.79056	3.87441	-2.36035	0.0268984	0.105377	-3.49666
hsa-miR-320e	-1.51	1.50672	-2.31449	0.0296954	0.109449	-3.50457
hsa-let-7e-5p	-0.772453	12.5244	-2.61837	0.0151983	0.0838147	-3.51769
hsa-let-7i-5p	0.741629	13.0624	2.60699	0.0155934	0.0838147	-3.55155
hsa-miR-125b-1-3p	-1.2188	4.22381	-2.32253	0.0291865	0.109132	-3.56704
hsa-miR-514b-5p	1.16647	5.60708	2.3609	0.026866	0.105377	-3.56789
hsa-miR-629-5p	1.5688	4.38906	2.29523	0.0309471	0.111782	-3.60148
hsa-miR-1	-1.37149	5.2636	-2.34331	0.027908	0.108274	-3.61332
hsa-miR-506-3p	1.231	3.30361	2.2636	0.0331087	0.117821	-3.6205
hsa-miR-4649-5p	-1.80629	1.37863	-2.23103	0.0354769	0.124463	-3.65004
hsa-miR-4804-5p	-1.56569	1.19147	-2.22808	0.0356986	0.124463	-3.65443
hsa-miR-149-5p	-1.43354	5.85442	-2.36442	0.0266622	0.105377	-3.66114
hsa-miR-210-3p	1.95856	5.77982	2.30087	0.0305757	0.111782	-3.67833
hsa-miR-454-5p	1.31644	2.97709	2.20895	0.0371686	0.128718	-3.70689
hsa-miR-324-5p	1.13213	6.78699	2.3383	0.0282116	0.108636	-3.71576
hsa-miR-3610	-1.58912	1.27783	-2.18274	0.0392718	0.1342	-3.72917
hsa-miR-7704	-0.885109	6.232	-2.32624	0.028954	0.109132	-3.7458
hsa-miR-138-5p	1.36564	6.67479	2.29222	0.0311469	0.111782	-3.76234
hsa-miR-429	1.60313	3.12179	2.17796	0.0396669	0.134659	-3.76883
hsa-miR-197-3p	-0.803303	7.57672	-2.36335	0.0267238	0.105377	-3.77909
hsa-miR-139-5p	-0.852104	6.84834	-2.33322	0.0285224	0.109019	-3.78203
hsa-miR-4525	-1.68414	1.52036	-2.12876	0.0439452	0.145357	-3.81807
hsa-miR-133a-3p	-2.33774	3.20121	-2.11527	0.0451886	0.145735	-3.88415
hsa-miR-92b-5p	-1.19059	4.35206	-2.13952	0.0429755	0.144005	-3.90847
hsa-miR-369-3p	1.37069	3.3648	2.0833	0.0482622	0.150929	-3.92825
hsa-miR-504-5p	-1.91588	3.4546	-2.08823	0.0477766	0.150321	-3.93938
hsa-miR-99b-5p	-0.681214	8.1717	-2.2915	0.031195	0.111782	-3.95441
hsa-miR-301b	1.21334	1.75516	2.03767	0.0529734	0.162616	-3.97141
hsa-miR-503-5p	1.63998	2.42882	2.03501	0.0532598	0.162616	-3.9907
hsa-miR-876-5p	-1.49513	1.44082	-2.02038	0.054862	0.165043	-3.99413
hsa-miR-3613-5p	1.19583	5.60028	2.11225	0.0454715	0.145735	-3.99503
hsa-miR-4792	-1.40609	1.19713	-2.01901	0.0550145	0.165043	-3.99653
hsa-miR-34b-3p	-1.44431	3.69553	-2.04151	0.0525613	0.162405	-4.00534
hsa-miR-26a-2-3p	1.10204	2.57081	2.01269	0.0557215	0.166198	-4.01951
hsa-miR-192-5p	1.01004	5.75063	2.10875	0.0458011	0.145885	-4.0348
hsa-miR-7977	1.20954	4.09395	2.0257	0.0542749	0.16474	-4.05575
hsa-miR-421	1.10747	6.58951	2.13637	0.0432574	0.144005	-4.05704
hsa-miR-185-3p	1.35203	1.73562	1.98415	0.0590149	0.17501	-4.05806
hsa-miR-28-5p	0.642296	8.66095	2.23333	0.0353043	0.124463	-4.06523
hsa-miR-4685-3p	1.19653	1.55908	1.96686	0.0610944	0.180141	-4.08171
hsa-miR-181b-5p	0.613371	12.0104	2.31491	0.0296682	0.109449	-4.09445
hsa-miR-146a-5p	0.832125	12.6933	2.32359	0.0291197	0.109132	-4.09838
hsa-miR-513b-5p	0.825696	6.9713	2.13888	0.0430326	0.144005	-4.10172
hsa-miR-550a-5p	1.49894	2.25229	1.95803	0.06218	0.18127	-4.1063
hsa-miR-3195	-1.40322	0.898649	-1.92749	0.0660679	0.187313	-4.14188
hsa-miR-4521	1.27783	3.82008	1.96065	0.0618555	0.18127	-4.14491
hsa-miR-942-5p	1.24572	2.51372	1.9297	0.06578	0.187313	-4.14802
hsa-miR-15b-5p	0.71235	8.71767	2.19184	0.0385299	0.132543	-4.149
hsa-miR-6820-5p	-1.3562	1.08581	-1.91091	0.0682675	0.191446	-4.1673
hsa-miR-376c-3p	-1.50168	1.32524	-1.88499	0.0718339	0.1957	-4.20268
hsa-miR-452-5p	1.33613	3.9261	1.9299	0.0657541	0.187313	-4.20328
hsa-miR-532-5p	0.826715	7.4234	2.09381	0.0472318	0.149519	-4.2101
hsa-miR-3196	-1.17875	3.17331	-1.89978	0.0697801	0.193789	-4.2135
hsa-miR-1247-5p	-1.6027	3.85402	-1.95402	0.0626788	0.181698	-4.21713
hsa-miR-433-3p	-1.24144	2.73822	-1.88339	0.0720602	0.1957	-4.22091
hsa-miR-485-5p	-1.25612	1.06951	-1.86859	0.0741729	0.19934	-4.22922
hsa-miR-510-5p	1.19652	4.02095	1.91296	0.067993	0.191446	-4.23302
hsa-miR-4728-3p	-1.30316	2.16563	-1.85485	0.0761847	0.202636	-4.2491
hsa-miR-509-3-5p	1.25929	8.26497	2.11587	0.0451331	0.145735	-4.24978
hsa-miR-1249	-1.29075	4.37472	-1.93489	0.0651078	0.187313	-4.26406
hsa-miR-642a-5p	1.38182	3.98585	1.87959	0.0725973	0.196127	-4.27584
hsa-miR-505-5p	-1.63438	2.47945	-1.81267	0.0826562	0.215001	-4.31564
hsa-miR-205-3p	1.2869	1.81957	1.80668	0.0836118	0.215719	-4.33202
hsa-miR-891a-5p	-1.61997	3.89733	-1.86391	0.074853	0.200125	-4.33339
hsa-miR-483-5p	-1.41789	2.36342	-1.77722	0.0884554	0.22374	-4.36467
hsa-miR-196a-5p	1.94655	9.18282	2.07112	0.049482	0.153812	-4.36821
hsa-miR-2277-3p	1.23019	1.42461	1.7741	0.0889816	0.223973	-4.37218
hsa-miR-642a-3p	1.03221	1.03271	1.76857	0.0899236	0.225245	-4.37944
hsa-miR-1306-5p	-0.939033	4.31693	-1.84046	0.0783404	0.206744	-4.38052
hsa-miR-671-5p	1.04398	4.38154	1.81103	0.0829169	0.215001	-4.39461
hsa-miR-3609	-1.2162	2.03722	-1.73259	0.0962506	0.235381	-4.42554
hsa-miR-222-3p	0.716099	11.1713	2.11482	0.0452306	0.145735	-4.43216
hsa-miR-3151-5p	-1.26561	1.11564	-1.72567	0.0975103	0.237336	-4.44179
hsa-miR-1275	-0.950551	5.63076	-1.8975	0.070093	0.193789	-4.44312
hsa-miR-29b-2-5p	-0.939388	4.27084	-1.75732	0.0918629	0.2268	-4.49435
hsa-miR-26b-5p	0.623479	13.9293	2.12543	0.0442489	0.145429	-4.52392
hsa-miR-324-3p	0.894755	5.03106	1.76485	0.0905597	0.225743	-4.52445
hsa-miR-342-3p	1.01058	7.19137	1.89651	0.0702296	0.193789	-4.53442
hsa-miR-1292-5p	0.925216	1.35192	1.65055	0.112111	0.266585	-4.54541
hsa-miR-514a-5p	1.18297	5.41163	1.7417	0.094614	0.23248	-4.60546
hsa-miR-135b-5p	1.00595	1.62532	1.60218	0.122449	0.283336	-4.61158
hsa-miR-664a-5p	-0.662641	5.92598	-1.79247	0.0859196	0.218397	-4.61223
hsa-miR-210-5p	1.22245	3.25247	1.62079	0.118381	0.275156	-4.62158
hsa-let-7f-2-3p	0.871743	1.80947	1.59383	0.124313	0.285951	-4.62258
hsa-miR-93-3p	0.917082	4.09486	1.6318	0.116027	0.273378	-4.64064
hsa-miR-29a-5p	0.838148	2.54407	1.58443	0.126438	0.288681	-4.64511
hsa-miR-585-3p	-1.14573	2.33584	-1.57677	0.128192	0.290607	-4.6469
hsa-miR-370-3p	1.0806	2.00183	1.57584	0.128408	0.290607	-4.65312
hsa-miR-411-3p	-0.996777	1.92228	-1.53753	0.137496	0.304699	-4.69026
hsa-miR-125a-3p	-0.762258	5.14278	-1.68469	0.105261	0.252625	-4.69257
hsa-miR-24-2-5p	0.878244	4.96514	1.63583	0.115177	0.27262	-4.70286
hsa-miR-8072	-1.24112	1.09784	-1.52705	0.140072	0.306665	-4.70974
hsa-miR-3154	-1.1186	1.93103	-1.51326	0.143524	0.31117	-4.72144
hsa-miR-450a-2-3p	0.926115	2.21256	1.5092	0.144554	0.312091	-4.73979
hsa-miR-199b-5p	-0.682889	8.02168	-1.83658	0.0789314	0.206744	-4.75346
hsa-miR-542-5p	0.888633	2.5013	1.50084	0.146692	0.315387	-4.75451
hsa-miR-212-3p	0.924181	3.92728	1.53716	0.137587	0.304699	-4.75502
hsa-miR-4508	-0.98868	3.52184	-1.54426	0.135862	0.303484	-4.75812
hsa-miR-1307-3p	1.05013	5.7493	1.65591	0.11101	0.265191	-4.77532
hsa-miR-769-5p	1.08144	5.47909	1.62097	0.118343	0.275156	-4.77868
hsa-miR-23a-3p	0.490354	10.8625	1.88884	0.0712938	0.195679	-4.81
hsa-miR-92b-3p	-0.606106	8.9933	-1.8376	0.0787758	0.206744	-4.81666
hsa-miR-486-5p	-0.923826	8.06069	-1.79745	0.0851043	0.218397	-4.82208
hsa-miR-5001-3p	-0.947815	0.773684	-1.43829	0.163513	0.341589	-4.82439
hsa-miR-1260b	-0.901977	2.8896	-1.44377	0.16198	0.339763	-4.8314
hsa-miR-374a-5p	0.666466	7.37805	1.71536	0.0994134	0.239707	-4.84037
hsa-miR-3679-5p	-1.08521	1.64949	-1.40612	0.172752	0.35656	-4.85415
hsa-miR-489-3p	1.11987	2.33324	1.4084	0.172082	0.35656	-4.86712
hsa-miR-144-3p	-1.07382	1.52231	-1.36981	0.183671	0.36877	-4.89896
hsa-miR-651-5p	0.854897	1.38813	1.37349	0.18254	0.36877	-4.89995
hsa-miR-487a-5p	-1.15711	2.88934	-1.38587	0.178775	0.366062	-4.90318
hsa-miR-508-3p	0.689283	9.93315	1.79415	0.0856436	0.218397	-4.91136
hsa-miR-34a-3p	-1.03641	1.2332	-1.36037	0.186596	0.370999	-4.91225
hsa-miR-377-5p	-0.89081	1.25366	-1.35928	0.186937	0.370999	-4.91355
hsa-miR-20a-3p	-1.08651	1.39169	-1.35233	0.189118	0.3712	-4.91815
hsa-miR-136-5p	-1.11502	1.89539	-1.34861	0.190293	0.3712	-4.92205
hsa-miR-616-5p	1.01782	1.58893	1.35314	0.188863	0.3712	-4.92454
hsa-miR-23b-5p	-0.85337	3.15298	-1.37623	0.181701	0.36877	-4.93397
hsa-miR-134-5p	-0.724834	5.07077	-1.51509	0.143062	0.31117	-4.93621
hsa-miR-148a-3p	0.546015	8.70393	1.71912	0.0987159	0.239143	-4.95189
hsa-miR-330-5p	0.843628	1.64372	1.32116	0.199145	0.379796	-4.9609
hsa-miR-483-3p	-1.12101	1.90418	-1.31458	0.201316	0.381908	-4.96146
hsa-miR-181c-5p	0.731999	5.75225	1.48278	0.151396	0.322812	-4.99015
hsa-miR-16-2-3p	0.714153	6.22912	1.5263	0.140258	0.306665	-4.99206
hsa-miR-30c-1-3p	-0.599927	5.24082	-1.47197	0.154271	0.326245	-4.99633
hsa-miR-5010-5p	-0.909497	1.43342	-1.28144	0.212517	0.394953	-4.99964
hsa-miR-642b-5p	0.817304	1.31643	1.28276	0.212062	0.394953	-5.00306
hsa-miR-1307-5p	0.769422	4.5549	1.37029	0.183523	0.36877	-5.02148
hsa-miR-2116-3p	-0.914824	2.51507	-1.25593	0.221464	0.401908	-5.02981
hsa-miR-664b-3p	0.875005	1.84137	1.26493	0.218274	0.397984	-5.03032
hsa-miR-1306-3p	-0.67301	0.960841	-1.24791	0.224333	0.403496	-5.04265
hsa-miR-148a-5p	0.822433	3.31729	1.27379	0.215171	0.39795	-5.05082
hsa-miR-3653	0.779868	4.48223	1.32706	0.197216	0.379714	-5.06196
hsa-miR-944	0.910974	2.01602	1.23513	0.228966	0.406002	-5.06485
hsa-miR-26a-1-3p	-0.858709	0.993203	-1.22352	0.233238	0.410753	-5.06869
hsa-miR-5100	-0.864437	2.71816	-1.23744	0.228125	0.406002	-5.06958
hsa-miR-154-5p	-0.809816	2.70599	-1.22643	0.232162	0.410258	-5.0761
hsa-miR-193a-3p	-0.997864	2.34976	-1.2086	0.238817	0.417136	-5.08655
hsa-miR-450a-5p	0.987798	1.6258	1.19918	0.242388	0.421118	-5.09759
hsa-miR-1908-5p	-0.914719	3.03994	-1.20735	0.239287	0.417136	-5.11171
hsa-miR-663a	0.841135	1.88712	1.18545	0.247669	0.427416	-5.11176
hsa-miR-326	-0.843973	1.38603	-1.16446	0.255903	0.434362	-5.12622
hsa-miR-188-5p	0.830638	1.69524	1.16451	0.255883	0.434362	-5.13135
hsa-miR-142-3p	1.08743	5.15674	1.33212	0.195575	0.377965	-5.13327
hsa-miR-21-3p	0.889751	2.69956	1.17806	0.250546	0.429507	-5.14187
hsa-miR-195-3p	-0.886292	1.96728	-1.14363	0.264272	0.442741	-5.1447
hsa-miR-425-5p	0.507777	6.93122	1.47827	0.152592	0.324021	-5.14613
hsa-miR-6510-3p	0.878895	2.108	1.1515	0.261087	0.440264	-5.14864
hsa-miR-342-5p	-0.597566	7.93338	-1.56135	0.131785	0.296948	-5.15359
hsa-miR-361-3p	0.580061	8.03651	1.54735	0.135117	0.303132	-5.15744
hsa-miR-204-3p	-0.994796	2.96747	-1.13968	0.265884	0.444	-5.16249
hsa-miR-502-3p	0.729817	3.63528	1.18784	0.246741	0.427242	-5.16725
hsa-miR-144-5p	0.786245	1.71284	1.12588	0.271563	0.451725	-5.1687
hsa-miR-224-5p	0.748607	4.6658	1.26717	0.217486	0.397984	-5.17192
hsa-miR-500a-3p	0.725452	4.42079	1.23593	0.228675	0.406002	-5.17254
hsa-miR-148b-5p	0.701405	1.83735	1.11981	0.274091	0.453304	-5.17866
hsa-miR-128-1-5p	-0.814626	1.73656	-1.09314	0.285392	0.464549	-5.19491
hsa-miR-409-3p	-0.550015	6.37217	-1.42293	0.167873	0.349284	-5.19853
hsa-miR-181c-3p	0.659196	3.10608	1.1242	0.272261	0.451725	-5.19894
hsa-miR-335-5p	0.751079	3.41257	1.14432	0.263995	0.442741	-5.20085
hsa-miR-6516-5p	0.825999	2.18239	1.09585	0.284227	0.464117	-5.20322
hsa-miR-365a-5p	-0.67809	2.84679	-1.10273	0.281291	0.460782	-5.20325
hsa-miR-3651	0.685646	3.90726	1.17882	0.250247	0.429507	-5.20496
hsa-miR-138-1-3p	0.762965	4.78088	1.21477	0.236498	0.415079	-5.2164
hsa-miR-502-5p	0.680204	1.73562	1.07535	0.293115	0.474129	-5.21884
hsa-miR-3934-5p	0.57918	1.69388	1.04445	0.306884	0.486131	-5.24604
hsa-miR-204-5p	-0.870768	10.1946	-1.59216	0.124688	0.285951	-5.24829
hsa-miR-493-5p	0.563013	6.13255	1.32018	0.199467	0.379796	-5.25477
hsa-miR-330-3p	0.575555	2.84721	1.05208	0.303441	0.484755	-5.26277
hsa-miR-32-3p	0.793383	3.25869	1.06036	0.299739	0.481823	-5.26547
hsa-miR-374b-3p	0.716847	2.83214	1.03976	0.309014	0.486131	-5.27136
hsa-miR-181d-5p	0.669728	5.66663	1.24766	0.224425	0.403496	-5.27525
hsa-miR-125b-2-3p	0.714136	3.26196	1.05376	0.302688	0.484755	-5.28168
hsa-miR-876-3p	-0.987486	2.86141	-1.00573	0.324773	0.503252	-5.28193
hsa-miR-4423-3p	0.71344	1.15109	0.986197	0.334064	0.5161	-5.30192
hsa-miR-331-3p	0.754835	2.68932	1.00807	0.323669	0.503051	-5.30472
hsa-miR-4662a-5p	-0.631095	1.09531	-0.975544	0.339209	0.517845	-5.31239
hsa-miR-887-3p	0.656117	2.12371	0.976552	0.33872	0.517845	-5.31367
hsa-miR-378a-3p	0.713047	9.10005	1.49111	0.149212	0.319475	-5.31931
hsa-let-7f-1-3p	-0.813938	1.83876	-0.953594	0.349979	0.527417	-5.32179
hsa-miR-625-3p	0.651481	2.54848	0.976353	0.338816	0.517845	-5.32191
hsa-miR-744-3p	-0.664263	2.87504	-0.98095	0.336591	0.517845	-5.32241
hsa-miR-3615	0.702533	5.25823	1.17529	0.251628	0.429933	-5.33167
hsa-let-7a-3p	0.462743	7.29634	1.3641	0.185437	0.370874	-5.3326
hsa-miR-99a-5p	-0.948057	5.59366	-1.2698	0.216565	0.397984	-5.33782
hsa-let-7a-5p	-0.406484	18.4572	-1.76135	0.0911638	0.226156	-5.34073
hsa-miR-744-5p	-0.476916	10.0731	-1.52924	0.139532	0.306665	-5.34224
hsa-let-7g-5p	0.434545	13.6446	1.626	0.117264	0.275037	-5.3453
hsa-miR-664b-5p	-0.529343	3.08834	-0.952363	0.350589	0.527417	-5.35274
hsa-miR-200b-3p	0.770777	7.93999	1.39707	0.175424	0.360632	-5.36801
hsa-miR-497-5p	-0.552772	5.93537	-1.2364	0.228504	0.406002	-5.37495
hsa-miR-487a-3p	-0.772254	1.30903	-0.896254	0.379191	0.557442	-5.37688
hsa-miR-760	-0.627556	1.82289	-0.873889	0.391006	0.567382	-5.38763
hsa-miR-1976	-0.559967	2.04451	-0.873058	0.39145	0.567382	-5.38921
hsa-miR-3928-3p	-0.663644	2.38002	-0.876708	0.389504	0.567382	-5.39131
hsa-miR-143-5p	-0.553726	3.45877	-0.95246	0.350541	0.527417	-5.40149
hsa-miR-548l	-0.556394	0.904308	-0.864924	0.395809	0.568523	-5.40374
hsa-miR-152-3p	0.450099	8.28216	1.38168	0.180041	0.367198	-5.40432
hsa-miR-375	-0.746087	2.82549	-0.903332	0.3755	0.555898	-5.41179
hsa-miR-510-3p	0.471619	1.56325	0.848378	0.404771	0.576613	-5.41231
hsa-miR-376a-3p	-0.736528	3.09432	-0.9024	0.375985	0.555898	-5.41443
hsa-miR-1301-3p	0.602842	5.05493	1.06824	0.296246	0.477697	-5.41737
hsa-let-7e-3p	-0.673666	4.3633	-1.0247	0.315921	0.495487	-5.41855
hsa-miR-424-5p	0.586009	3.86286	0.915427	0.36925	0.549086	-5.42947
hsa-miR-99a-3p	0.604845	2.49157	0.846785	0.405641	0.576613	-5.43082
hsa-miR-30b-5p	0.452686	10.4524	1.45021	0.160194	0.337388	-5.45023
hsa-miR-223-3p	0.47204	7.80182	1.30743	0.203692	0.385	-5.45172
hsa-miR-377-3p	-0.544734	1.13981	-0.792525	0.435969	0.609647	-5.45425
hsa-miR-431-5p	0.627497	2.1273	0.803626	0.429653	0.602448	-5.45433
hsa-miR-513a-5p	0.542463	8.57751	1.3517	0.189318	0.3712	-5.46551
hsa-miR-141-5p	0.657727	1.80586	0.772638	0.447425	0.617302	-5.47195
hsa-miR-10a-3p	0.603597	2.25389	0.7733	0.44704	0.617302	-5.47415
hsa-miR-486-3p	0.848902	4.57907	0.949933	0.351797	0.527696	-5.47926
hsa-miR-616-3p	-0.585348	1.55123	-0.755148	0.457649	0.62805	-5.48009
hsa-miR-365a-3p	-0.556953	2.79587	-0.784166	0.440762	0.611379	-5.48102
hsa-miR-365b-3p	-0.556953	2.79587	-0.784166	0.440762	0.611379	-5.48102
hsa-miR-660-3p	0.531836	1.59669	0.732842	0.470889	0.639418	-5.49629
hsa-miR-543	-0.458991	3.93176	-0.868839	0.393707	0.567465	-5.50089
hsa-miR-23a-5p	-0.591371	3.94785	-0.863372	0.396644	0.568523	-5.50529
hsa-miR-34c-3p	0.589781	3.07207	0.738061	0.467772	0.63686	-5.51366
hsa-miR-145-5p	-0.712598	4.59998	-0.970481	0.341673	0.520068	-5.51469
hsa-miR-187-3p	0.445967	1.5606	0.700639	0.490396	0.653861	-5.51662
hsa-miR-150-5p	0.773574	8.36261	1.29977	0.206261	0.387598	-5.51957
hsa-miR-892a	-0.610395	2.04947	-0.691611	0.495946	0.656906	-5.52046
hsa-miR-369-5p	0.441022	1.32997	0.690911	0.496378	0.656906	-5.52267
hsa-miR-331-5p	0.44377	1.24153	0.669736	0.509542	0.667319	-5.53701
hsa-miR-1296-5p	0.498599	3.23199	0.730024	0.472577	0.640026	-5.53964
hsa-miR-145-3p	-0.494842	1.41723	-0.652732	0.520253	0.676198	-5.54275
hsa-miR-101-5p	-0.459514	2.57928	-0.654925	0.518864	0.676198	-5.5483
hsa-miR-33a-5p	0.53227	3.32248	0.723832	0.4763	0.640028	-5.55212
hsa-miR-940	-0.456179	1.0747	-0.642365	0.526843	0.683042	-5.55359
hsa-miR-6741-3p	-0.433187	1.05274	-0.629703	0.534953	0.69009	-5.56545
hsa-miR-184	-0.458754	1.66405	-0.605949	0.550347	0.704662	-5.56882
hsa-miR-374c-5p	0.390149	1.34069	0.608852	0.548453	0.703984	-5.57189
hsa-miR-3605-5p	-0.351165	2.0594	-0.560027	0.580751	0.730678	-5.5939
hsa-miR-30c-2-3p	-0.394452	4.91414	-0.84378	0.407285	0.57736	-5.60726
hsa-miR-365b-5p	-0.350452	2.65347	-0.570057	0.574039	0.727775	-5.61065
hsa-miR-190a-5p	-0.431354	3.66563	-0.654592	0.519075	0.676198	-5.61337
hsa-miR-218-5p	-0.516823	6.46122	-1.04795	0.305304	0.486131	-5.61653
hsa-miR-191-3p	0.40902	3.06474	0.574	0.571412	0.726228	-5.6173
hsa-miR-874-3p	0.378505	2.56217	0.552943	0.585516	0.733316	-5.62023
hsa-miR-507	0.405467	2.20116	0.526138	0.603714	0.747991	-5.62162
hsa-miR-200c-3p	0.8294	10.8591	1.34753	0.190636	0.3712	-5.62241
hsa-miR-29c-3p	-0.395095	7.56092	-1.15958	0.257845	0.436223	-5.62286
hsa-miR-29a-3p	0.395368	10.5806	1.32325	0.198461	0.379796	-5.62418
hsa-miR-6503-5p	-0.349433	2.87194	-0.54068	0.593808	0.740009	-5.63383
hsa-miR-32-5p	0.504324	4.1565	0.677549	0.504663	0.662611	-5.63427
hsa-miR-127-3p	-0.375344	6.73911	-1.07601	0.292828	0.474129	-5.64134
hsa-miR-3909	0.359801	3.51087	0.592121	0.559414	0.714499	-5.64548
hsa-let-7c-3p	-0.365702	2.14088	-0.445521	0.660013	0.790518	-5.64894
hsa-miR-3064-5p	-0.317809	1.17841	-0.450452	0.656506	0.790518	-5.64979
hsa-miR-4449	0.480171	3.7825	0.630192	0.534638	0.69009	-5.65807
hsa-miR-1270	0.391963	2.36829	0.445122	0.660297	0.790518	-5.65879
hsa-miR-132-3p	0.406533	7.51251	1.10491	0.280365	0.460728	-5.65938
hsa-miR-223-5p	-0.290609	1.76869	-0.403902	0.68993	0.807265	-5.66382
hsa-miR-5010-3p	0.317901	2.29834	0.429075	0.67177	0.795665	-5.6646
hsa-miR-3065-5p	0.282941	2.70753	0.447752	0.658425	0.790518	-5.66738
hsa-miR-511-3p	0.373601	3.04739	0.481395	0.63468	0.776055	-5.66777
hsa-miR-654-3p	-0.350369	4.98553	-0.806438	0.428062	0.601853	-5.67042
hsa-miR-3125	-0.255729	1.24153	-0.391624	0.698858	0.812186	-5.67294
hsa-miR-17-3p	0.364425	3.86411	0.564572	0.577705	0.730627	-5.67337
hsa-miR-877-5p	0.316546	2.8159	0.429089	0.671759	0.795665	-5.67381
hsa-miR-1248	-0.607009	4.17886	-0.727935	0.473832	0.640028	-5.67543
hsa-miR-7641	-0.277796	2.19607	-0.373601	0.712044	0.8238	-5.67693
hsa-miR-484	0.360729	5.77147	0.869112	0.393561	0.567465	-5.68232
hsa-miR-182-5p	0.565706	6.95726	1.04059	0.308636	0.486131	-5.68406
hsa-miR-3605-3p	-0.42686	5.19973	-0.762196	0.453512	0.624033	-5.68632
hsa-miR-410-3p	0.306292	2.25391	0.360587	0.721624	0.829305	-5.68793
hsa-miR-381-3p	0.362506	3.08068	0.433961	0.668268	0.795665	-5.68839
hsa-miR-34a-5p	0.346939	10.7988	1.28067	0.212785	0.394953	-5.69007
hsa-miR-766-3p	0.201808	1.36233	0.334692	0.740821	0.833952	-5.69094
hsa-miR-514b-3p	0.267271	1.45423	0.339422	0.737301	0.833952	-5.69099
hsa-let-7g-3p	-0.243322	1.64603	-0.325396	0.747756	0.83408	-5.69209
hsa-miR-338-5p	0.223647	1.98077	0.330527	0.743925	0.833952	-5.69275
hsa-miR-299-5p	0.231111	2.14976	0.329149	0.744953	0.833952	-5.69388
hsa-miR-183-5p	0.236748	1.40157	0.321012	0.751034	0.835201	-5.69491
hsa-miR-873-5p	-0.309585	2.87822	-0.366494	0.717269	0.826949	-5.69599
hsa-miR-126-3p	0.340401	10.2657	1.25447	0.221984	0.401908	-5.69614
hsa-miR-491-5p	-0.206823	1.09447	-0.329003	0.745062	0.833952	-5.69624
hsa-miR-584-5p	0.311856	4.09779	0.558177	0.581994	0.730678	-5.69674
hsa-miR-195-5p	-0.415148	7.74708	-1.10857	0.278811	0.459638	-5.69997
hsa-miR-656-3p	-0.202791	1.87467	-0.298233	0.768142	0.845431	-5.70008
hsa-miR-33b-5p	0.254194	1.48738	0.303654	0.764059	0.844228	-5.70027
hsa-miR-337-3p	-0.233627	2.13655	-0.297857	0.768425	0.845431	-5.7004
hsa-miR-320c	-0.368152	4.99253	-0.747615	0.462096	0.632367	-5.70315
hsa-miR-362-5p	-0.222284	2.64417	-0.331479	0.743216	0.833952	-5.70886
hsa-miR-1268b	0.186453	1.17217	0.27567	0.785207	0.860568	-5.70889
hsa-miR-3607-3p	-0.370835	5.78794	-0.891323	0.381775	0.558638	-5.71057
hsa-miR-151b	-0.303742	3.77633	-0.483761	0.633025	0.776055	-5.71157
hsa-miR-548k	-0.185079	1.00997	-0.275259	0.785519	0.860568	-5.71313
hsa-miR-1179	-0.193707	1.45977	-0.251316	0.80375	0.869466	-5.71356
hsa-miR-627-5p	-0.179322	1.30532	-0.255102	0.800859	0.869466	-5.71491
hsa-miR-193b-3p	-0.386087	6.15626	-0.926144	0.363769	0.542499	-5.71715
hsa-miR-937-3p	-0.156588	1.656	-0.203369	0.840594	0.898534	-5.72207
hsa-miR-1291	-0.141644	1.11564	-0.215344	0.831354	0.895571	-5.72297
hsa-miR-424-3p	0.395378	5.4817	0.745673	0.463246	0.632367	-5.72371
hsa-miR-888-5p	-0.162166	2.16102	-0.197115	0.84543	0.899468	-5.7238
hsa-miR-6769b-3p	0.140565	0.955182	0.22588	0.823244	0.888691	-5.72449
hsa-miR-874-5p	-0.124365	1.21573	-0.202753	0.84107	0.898534	-5.72459
hsa-miR-451a	0.38702	3.96809	0.47	0.642679	0.781615	-5.72526
hsa-miR-378c	0.116965	1.70513	0.172323	0.864657	0.912398	-5.72886
hsa-miR-362-3p	-0.234113	3.17296	-0.324522	0.748409	0.83408	-5.73322
hsa-miR-29c-5p	0.149978	2.34217	0.176143	0.861688	0.911129	-5.73359
hsa-miR-323b-3p	0.176953	2.65691	0.253444	0.802125	0.869466	-5.73469
hsa-miR-766-5p	0.0930112	1.77575	0.115957	0.90867	0.951063	-5.73637
hsa-miR-3129-3p	0.0650957	1.46963	0.102166	0.91949	0.958499	-5.73855
hsa-miR-98-3p	0.0520002	1.7479	0.0732558	0.942221	0.968082	-5.73979
hsa-miR-10b-3p	0.0443082	1.72798	0.0706001	0.944312	0.968082	-5.74002
hsa-miR-628-3p	-0.041002	1.36486	-0.0690046	0.945569	0.968082	-5.74062
hsa-miR-501-5p	0.073726	1.97059	0.0899918	0.929055	0.962643	-5.74066
hsa-miR-136-3p	-0.0279398	1.79353	-0.0373902	0.970489	0.979985	-5.741
hsa-miR-5187-5p	-0.053469	1.148	-0.0852368	0.932794	0.962643	-5.74112
hsa-miR-34b-5p	-0.00865259	2.01556	-0.0111857	0.99117	0.993094	-5.74164
hsa-miR-1262	0.0193998	1.64209	0.0296067	0.97663	0.984101	-5.74213
hsa-miR-7706	0.0208154	1.43817	0.02739	0.97838	0.984101	-5.74324
hsa-miR-23c	0.19455	3.69709	0.365542	0.717971	0.826949	-5.75754
hsa-miR-18a-3p	-0.213184	3.47695	-0.354424	0.726176	0.830836	-5.76102
hsa-miR-576-5p	0.142165	3.38181	0.211152	0.834586	0.89718	-5.762
hsa-miR-320d	-0.237561	4.16465	-0.435667	0.667047	0.795665	-5.76275
hsa-miR-25-5p	0.278126	5.31772	0.688655	0.497772	0.656906	-5.76317
hsa-miR-374a-3p	0.056328	2.92821	0.0760485	0.940023	0.968082	-5.76764
hsa-miR-24-1-5p	-0.00503001	3.15158	-0.00742393	0.994139	0.994139	-5.7716
hsa-miR-6516-3p	0.00917314	3.01538	0.0129885	0.989746	0.993094	-5.77176
hsa-miR-652-3p	0.286552	5.95497	0.785381	0.440063	0.611379	-5.77213
hsa-miR-19a-3p	0.22252	4.09268	0.400285	0.692556	0.808504	-5.77294
hsa-miR-99b-3p	0.235263	4.52296	0.485995	0.631463	0.776055	-5.78898
hsa-miR-214-5p	0.353488	4.74259	0.540452	0.593962	0.740009	-5.79026
hsa-miR-151a-5p	0.349847	8.46164	1.04357	0.307282	0.486131	-5.80186
hsa-miR-5701	-0.0407595	3.27304	-0.0640948	0.949436	0.968199	-5.80477
hsa-miR-338-3p	-0.258295	4.73673	-0.507892	0.616255	0.760736	-5.80604
hsa-miR-335-3p	0.228019	4.0489	0.34163	0.73566	0.833952	-5.8066
hsa-miR-30c-5p	-0.294684	12.835	-1.26649	0.217726	0.397984	-5.80841
hsa-miR-205-5p	0.984936	13.6947	1.29886	0.206569	0.387598	-5.81136
hsa-miR-1287-5p	-0.0929464	3.79383	-0.149708	0.88227	0.925307	-5.81487
hsa-miR-411-5p	0.145918	3.95103	0.256543	0.79976	0.869466	-5.82275
hsa-miR-615-3p	-0.0392111	3.5422	-0.0518127	0.959115	0.976141	-5.83007
hsa-miR-671-3p	-0.2458	5.13559	-0.582197	0.565968	0.721086	-5.83354
hsa-let-7f-5p	0.434296	15.7187	1.33779	0.193745	0.375837	-5.83415
hsa-miR-323a-3p	0.108434	4.10762	0.185566	0.854375	0.907114	-5.84376
hsa-miR-3687	0.148065	3.93479	0.204937	0.839383	0.898534	-5.84579
hsa-miR-200b-5p	0.273932	4.58249	0.405958	0.68844	0.807265	-5.8458
hsa-miR-582-5p	0.0376841	4.02126	0.0492158	0.961163	0.976299	-5.86209
hsa-miR-181a-2-3p	0.337951	8.27663	0.966326	0.343704	0.521621	-5.86291
hsa-miR-296-3p	-0.0963178	4.27955	-0.156893	0.876667	0.921304	-5.86314
hsa-miR-455-5p	-0.372254	5.65942	-0.620415	0.540944	0.696078	-5.86429
hsa-miR-487b-3p	-0.17421	4.39812	-0.30534	0.76279	0.844228	-5.86745
hsa-miR-150-3p	0.138912	4.03349	0.176201	0.861643	0.911129	-5.87911
hsa-miR-140-5p	-0.289838	6.29784	-0.707664	0.486101	0.651502	-5.88071
hsa-miR-186-5p	0.284552	7.55891	0.852916	0.4023	0.575033	-5.88755
hsa-miR-4497	-0.155092	4.53922	-0.303794	0.763954	0.844228	-5.89062
hsa-miR-4443	-0.133753	4.62649	-0.198939	0.844019	0.899468	-5.89504
hsa-miR-664a-3p	-0.121543	4.70196	-0.255006	0.800933	0.869466	-5.89737
hsa-miR-29b-1-5p	0.0910974	4.8011	0.163836	0.871258	0.917488	-5.89846
hsa-miR-4516	-0.0261489	4.29751	-0.0381534	0.969887	0.979985	-5.90624
hsa-miR-379-5p	-0.220899	5.60053	-0.525016	0.604481	0.747991	-5.93093
hsa-miR-423-3p	0.348674	9.86995	1.01062	0.322472	0.502705	-5.94213
hsa-miR-30a-3p	-0.211165	6.03754	-0.466299	0.645287	0.781615	-5.98631
hsa-miR-382-5p	-0.176523	5.77573	-0.410171	0.685389	0.805605	-5.98803
hsa-miR-10b-5p	0.296932	9.5546	0.933376	0.360101	0.538585	-5.99123
hsa-miR-339-3p	0.157019	5.95356	0.412126	0.683976	0.805605	-5.99181
hsa-miR-625-5p	0.0207053	5.64875	0.0405959	0.96796	0.979985	-6.03218
hsa-miR-508-5p	0.388596	7.92846	0.724892	0.475662	0.640028	-6.04678
hsa-miR-513c-5p	0.319463	9.94926	0.898297	0.378123	0.557442	-6.04736
hsa-miR-130b-5p	0.212987	6.88449	0.477612	0.637331	0.777453	-6.0703
hsa-let-7d-5p	-0.287533	12.6401	-1.01406	0.320865	0.501716	-6.07425
hsa-miR-30b-3p	-0.184424	6.95898	-0.467974	0.644107	0.781615	-6.08086
hsa-miR-101-3p	-0.324992	10.4558	-0.890574	0.382169	0.558638	-6.09346
hsa-miR-1180-3p	-0.199313	6.56831	-0.381431	0.706305	0.818996	-6.105
hsa-miR-339-5p	-0.192754	7.3492	-0.538685	0.595162	0.740009	-6.11771
hsa-miR-378a-5p	0.0592891	6.14137	0.0882426	0.93043	0.962643	-6.12161
hsa-miR-320b	-0.218324	9.00332	-0.690405	0.49669	0.656906	-6.1645
hsa-miR-29b-3p	-0.239399	7.69892	-0.482265	0.634071	0.776055	-6.16742
hsa-miR-455-3p	-0.139108	7.37996	-0.337281	0.738893	0.833952	-6.19053
hsa-miR-191-5p	0.172402	10.2273	0.702837	0.48905	0.653756	-6.22417
hsa-miR-199b-3p	0.223593	12.0096	0.815108	0.42318	0.596615	-6.22699
hsa-miR-361-5p	0.161329	8.37717	0.462972	0.647636	0.782623	-6.23638
hsa-miR-19b-3p	0.140343	7.99428	0.349736	0.729646	0.832959	-6.25483
hsa-miR-199a-3p	0.223369	13.0109	0.833697	0.412831	0.583618	-6.25755
hsa-miR-130a-3p	-0.146408	8.47008	-0.428327	0.672306	0.795665	-6.26089
hsa-miR-199a-5p	-0.178614	8.2044	-0.394042	0.697096	0.811968	-6.27535
hsa-miR-140-3p	-0.226396	9.67743	-0.558589	0.581717	0.730678	-6.28499
hsa-miR-28-3p	0.0202463	7.81442	0.0654379	0.948378	0.968199	-6.28723
hsa-miR-10a-5p	-0.119004	8.20903	-0.261085	0.796297	0.869466	-6.29435
hsa-miR-509-3p	0.218487	12.637	0.684977	0.500048	0.658226	-6.35315
hsa-miR-126-5p	-0.0441726	8.58359	-0.106127	0.91638	0.957191	-6.35329
hsa-miR-143-3p	0.128047	10.0872	0.424283	0.675212	0.797275	-6.37389
hsa-miR-30a-5p	0.102518	9.76122	0.33475	0.740778	0.833952	-6.3851
hsa-miR-23b-3p	0.028241	11.2452	0.0863258	0.931937	0.962643	-6.5251
hsa-miR-92a-3p	0.155975	14.1091	0.358059	0.72349	0.829602	-6.59803
hsa-miR-26a-5p	-0.0224976	16.445	-0.094927	0.925176	0.962482	-6.75673
