# Supplementary material for: BRAFV600E induces reversible mitotic arrest in human melanocytes via microRNA-mediated suppression of AURKB
Source: bioRxiv preprint, doi:10.1101/2020.05.21.109397, version 3 (2021-09-19)
Supplement: Table S3 [file 109397_file05.xlsx]

## Sheet: Condition_miRCon_vs_Control
id	gene_name	biotype	description	baseMean	log2FoldChange	lfcSE	stat	pvalue	padj
ENSG00000188026	RILPL1	protein_coding	Rab interacting lysosomal protein like 1	2129.26	0.157084	0.232643	0.675213	0.49954	0.999962
ENSG00000270112	AC090241.2	processed_transcript		1.01088	0.0180098	4.67466	0.00385265	0.996926	0.999962
ENSG00000280143	AP000892.3	TEC		259.121	0.508092	0.59047	0.860487	0.389521	0.999962
ENSG00000078237	TIGAR	protein_coding	TP53 induced glycolysis regulatory phosphatase	929.922	0.00182461	0.316937	0.005757	0.995407	0.999962
ENSG00000158486	DNAH3	protein_coding	dynein axonemal heavy chain 3	0.66452	-2.35098	4.61467	-0.509457	0.610432	0.999962
ENSG00000198242	RPL23A	protein_coding	ribosomal protein L23a	12931.2	-0.123257	0.190931	-0.645554	0.518568	0.999962
ENSG00000134108	ARL8B	protein_coding	ADP ribosylation factor like GTPase 8B	1522.43	-0.0461997	0.445838	-0.103624	0.917467	0.999962
ENSG00000263089	AC007114.2	antisense		6.44244	-5.82136	2.06631	-2.81727	0.00484343	0.0586312
ENSG00000276644	DACH1	protein_coding	dachshund family transcription factor 1	54.8964	1.15084	1.84072	0.625213	0.531831	0.999962
ENSG00000240423	LINC00636	lincRNA	long intergenic non-protein coding RNA 636	0.534575	-18.3091	4.64691	-3.94005	8.14637e-05	0.00244958
ENSG00000236040	CHIAP1	unprocessed_pseudogene	chitinase, acidic pseudogene 1	0.478138	-4.40231	4.67466	-0.941738	0.346327	0.989184
ENSG00000167578	RAB4B	protein_coding	RAB4B, member RAS oncogene family	5651.57	0.119828	0.4342	0.275973	0.782568	0.999962
ENSG00000275265	AC127002.1	lincRNA		1.22476	16.5235	4.62024	3.57632	0.00034846	0.00597229
ENSG00000197557	TTC30A	protein_coding	tetratricopeptide repeat domain 30A	201.453	0.769261	0.593698	1.29571	0.195075	0.88152
ENSG00000233540	DNM3-IT1	sense_intronic	DNM3 intronic transcript 1	1.43117	0.106961	4.64629	0.0230208	0.981634	0.999962
ENSG00000102174	PHEX	protein_coding	phosphate regulating endopeptidase homolog X-linked	1.73888	3.61597	4.58795	0.788144	0.430613	0.999962
ENSG00000277224	HIST1H2BF	protein_coding	histone cluster 1 H2B family member f	8.06718	-0.693878	2.46267	-0.281758	0.778129	0.999962
ENSG00000166391	MOGAT2	protein_coding	monoacylglycerol O-acyltransferase 2	1.51819	-5.74924	4.67466	-1.22987	0.218744	0.926327
ENSG00000278616	BEND3P3	processed_pseudogene	BEN domain containing 3 pseudogene 3	73.1942	0.837848	0.78455	1.06794	0.28555	0.963912
ENSG00000070087	PFN2	protein_coding	profilin 2	5526.82	0.0726413	0.40463	0.179525	0.857525	0.999962
ENSG00000261765	AC009127.1	sense_intronic		0.335222	16.0748	4.64681	3.45933	0.000541525	0.00826668
ENSG00000204946	ZNF783	protein_coding	zinc finger family member 783	993.965	-0.0356185	0.238962	-0.149055	0.88151	0.999962
ENSG00000279700	AC131212.2	TEC		12.2143	-1.58816	1.53302	-1.03597	0.300216	0.973159
ENSG00000280038	DNM1P41	TEC	dynamin 1 pseudogene 41	4.43439	-3.65466	1.67761	-2.1785	0.0293692	0.275484
ENSG00000153561	RMND5A	protein_coding	required for meiotic nuclear division 5 homolog A	1761.57	0.207636	0.406021	0.511393	0.609076	0.999962
ENSG00000269148	AC092301.1	antisense		10.4127	-3.76227	2.42856	-1.54918	0.121339	0.702614
ENSG00000235411	AC007041.1	processed_pseudogene		4.72921	1.28711	1.61565	0.796653	0.425653	0.999962
ENSG00000179262	RAD23A	protein_coding	RAD23 homolog A, nucleotide excision repair protein	28064.7	0.151215	0.248364	0.608844	0.542628	0.999962
ENSG00000104833	TUBB4A	protein_coding	tubulin beta 4A class IVa	70740.6	-0.0310815	0.220622	-0.140881	0.887964	0.999962
ENSG00000006695	COX10	protein_coding	COX10, heme A:farnesyltransferase cytochrome c oxidase assembly factor	789.29	-0.222425	0.216854	-1.02569	0.305037	0.978077
ENSG00000258630	LINC02292	lincRNA	long intergenic non-protein coding RNA 2292	4.02763	0.0180053	4.67466	0.00385168	0.996927	0.999962
ENSG00000214062	RPL7P17	processed_pseudogene	ribosomal protein L7 pseudogene 17	0.311624	-5.18869	4.67466	-1.10996	0.267016	0.960199
ENSG00000095587	TLL2	protein_coding	tolloid like 2	11.3929	-0.360787	3.07326	-0.117395	0.906547	0.999962
ENSG00000167700	MFSD3	protein_coding	major facilitator superfamily domain containing 3	15700.5	-0.122997	0.216994	-0.566823	0.570834	0.999962
ENSG00000064601	CTSA	protein_coding	cathepsin A	96147.4	-0.18398	0.212887	-0.864212	0.387471	0.999911
ENSG00000008517	IL32	protein_coding	interleukin 32	536.886	0.776069	1.1948	0.649539	0.51599	0.999962
ENSG00000172137	CALB2	protein_coding	calbindin 2	9.76359	0.113697	3.48487	0.032626	0.973973	0.999962
ENSG00000229637	PRAC2	protein_coding	prostate cancer susceptibility candidate 2	529.921	-0.0129107	0.265951	-0.0485455	0.961281	0.999962
ENSG00000236893	ASS1P7	processed_pseudogene	argininosuccinate synthetase 1 pseudogene 7	0.873365	12.9468	4.64925	2.78472	0.00535744	0.0639723
ENSG00000070081	NUCB2	protein_coding	nucleobindin 2	263.898	0.290733	0.612249	0.474861	0.634886	0.999962
ENSG00000088179	PTPN4	protein_coding	protein tyrosine phosphatase, non-receptor type 4	126.13	0.682382	0.899606	0.758534	0.448132	0.999962
ENSG00000275479	AC087741.2	lincRNA		3.79474	0.919395	2.31542	0.397076	0.691312	0.999962
ENSG00000112309	B3GAT2	protein_coding	beta-1,3-glucuronyltransferase 2	32.6821	4.61899	1.63588	2.82355	0.00474955	0.0575458
ENSG00000158480	SPATA2	protein_coding	spermatogenesis associated 2	3143.78	0.104265	0.181523	0.574392	0.565703	0.999962
ENSG00000197421	GGT3P	transcribed_unprocessed_pseudogene	gamma-glutamyltransferase 3 pseudogene	0.683054	-4.16868	4.67466	-0.89176	0.372522	0.998664
ENSG00000196167	COLCA1	antisense	colorectal cancer associated 1	5.07181	2.46622	4.16548	0.592062	0.553809	0.999962
ENSG00000179833	SERTAD2	protein_coding	SERTA domain containing 2	2068.54	-0.0352372	0.24197	-0.145626	0.884217	0.999962
ENSG00000165312	OTUD1	protein_coding	OTU deubiquitinase 1	1030.65	-0.539304	0.230813	-2.33654	0.0194633	0.197305
ENSG00000159618	ADGRG5	protein_coding	adhesion G protein-coupled receptor G5	27.9642	0.417383	1.28274	0.325385	0.74489	0.999962
ENSG00000064225	ST3GAL6	protein_coding	ST3 beta-galactoside alpha-2,3-sialyltransferase 6	1298.45	-0.297231	0.24483	-1.21403	0.224736	0.935938
ENSG00000134709	HOOK1	protein_coding	hook microtubule tethering protein 1	91.7811	0.586256	1.31515	0.445771	0.655763	0.999962
ENSG00000057294	PKP2	protein_coding	plakophilin 2	47.3916	1.77067	1.33173	1.32961	0.183648	0.859979
ENSG00000213988	ZNF90	protein_coding	zinc finger protein 90	10.9947	0.637551	2.04311	0.312049	0.755003	0.999962
ENSG00000171861	MRM3	protein_coding	mitochondrial rRNA methyltransferase 3	2073.7	0.111722	0.176918	0.63149	0.52772	0.999962
ENSG00000177981	ASB8	protein_coding	ankyrin repeat and SOCS box containing 8	1067.46	0.16899	0.171033	0.988052	0.323127	0.989184
ENSG00000233614	DDX11L10	transcribed_unprocessed_pseudogene	DEAD/H-box helicase 11 like 10	6.56993	3.80059	4.3208	0.879604	0.379074	0.99936
ENSG00000259659	AC009996.1	sense_intronic		4.80945	-3.69154	2.53212	-1.45788	0.144873	0.769555
ENSG00000120662	MTRF1	protein_coding	mitochondrial translation release factor 1	74.7816	0.227832	0.700561	0.325213	0.74502	0.999962
ENSG00000259952	AC009133.2	antisense		0.178852	16.3632	4.64768	3.52073	0.000430357	0.00680209
ENSG00000225630	MTND2P28	unprocessed_pseudogene	mitochondrially encoded NADH:ubiquinone oxidoreductase core subunit 2 pseudogene 28	82333.3	-0.131078	0.24407	-0.537052	0.591232	0.999962
ENSG00000164283	ESM1	protein_coding	endothelial cell specific molecule 1	12.2412	0.643538	3.88971	0.165446	0.868593	0.999962
ENSG00000013392	RWDD2A	protein_coding	RWD domain containing 2A	132.696	0.29944	0.594478	0.503702	0.614471	0.999962
ENSG00000226688	ENTPD1-AS1	antisense	ENTPD1 antisense RNA 1	108.871	-0.303063	0.625949	-0.484166	0.628268	0.999962
ENSG00000204581	ACOXL-AS1	antisense	ACOXL antisense RNA 1	0.631511	11.8162	4.64698	2.54276	0.010998	0.122072
ENSG00000244265	SIAH2-AS1	antisense	SIAH2 antisense RNA 1	8.77431	-0.963694	2.34297	-0.411313	0.680843	0.999962
ENSG00000166913	YWHAB	protein_coding	tyrosine 3-monooxygenase/tryptophan 5-monooxygenase activation protein beta	9112.39	-0.293508	0.362325	-0.810067	0.417901	0.999962
ENSG00000272911	AC005696.3	lincRNA		2.69188	-14.2689	4.67466	-3.05239	0.00227027	0.029571
ENSG00000146700	SSC4D	protein_coding	scavenger receptor cysteine rich family member with 4 domains	82.4017	0.43907	0.533236	0.823406	0.410277	0.999962
ENSG00000130204	TOMM40	protein_coding	translocase of outer mitochondrial membrane 40	12555.9	0.176347	0.27801	0.634316	0.525874	0.999962
ENSG00000280387	AL109806.1	TEC		2.14151	-1.63367	4.55506	-0.358648	0.719858	0.999962
ENSG00000189099	PRSS48	protein_coding	serine protease 48	0.596736	-3.77965	4.58581	-0.824204	0.409824	0.999962
ENSG00000232879	AL591806.2	processed_pseudogene		0.234305	-5.57984	4.67466	-1.19363	0.232621	0.940802
ENSG00000111863	ADTRP	protein_coding	androgen dependent TFPI regulating protein	6.45664	-7.43618	3.89013	-1.91155	0.0559335	0.440756
ENSG00000240583	AQP1	protein_coding	aquaporin 1 (Colton blood group)	76.0021	1.14273	0.912545	1.25224	0.210482	0.911978
ENSG00000109618	SEPSECS	protein_coding	Sep (O-phosphoserine) tRNA:Sec (selenocysteine) tRNA synthase	166.113	-0.290042	0.877402	-0.330569	0.74097	0.999962
ENSG00000214866	DCDC2C	protein_coding	doublecortin domain containing 2C	1.46397	-5.73296	4.67466	-1.22639	0.220052	0.928084
ENSG00000279345	Z98885.3	antisense		12.1654	-0.858199	1.6354	-0.524763	0.599748	0.999962
ENSG00000153015	CWC27	protein_coding	CWC27 spliceosome associated protein homolog	55.6222	1.21841	1.08815	1.1197	0.26284	0.958871
ENSG00000260549	MT1L	transcribed_unprocessed_pseudogene	metallothionein 1L, pseudogene	84.206	-0.278515	1.05171	-0.264823	0.791146	0.999962
ENSG00000268234	FKBP4P6	processed_pseudogene	FK506 binding protein 4 pseudogene 6	26.4017	-0.16992	0.578397	-0.293778	0.768927	0.999962
ENSG00000250210	FO082796.1	unprocessed_pseudogene		0.498891	-13.0896	4.67466	-2.80012	0.0051083	0.0614281
ENSG00000257246	PHBP19	processed_pseudogene	prohibitin pseudogene 19	1.67154	0.2043	4.61356	0.0442825	0.964679	0.999962
ENSG00000036448	MYOM2	protein_coding	myomesin 2	25.5273	0.0569249	0.760289	0.0748727	0.940316	0.999962
ENSG00000164114	MAP9	protein_coding	microtubule associated protein 9	82.89	1.70514	1.34978	1.26327	0.206493	0.905054
ENSG00000281091	AL606763.1	lincRNA		1.68111	-0.11966	4.56746	-0.0261983	0.979099	0.999962
ENSG00000268895	A1BG-AS1	antisense	A1BG antisense RNA 1	942.349	-0.323715	0.370894	-0.872796	0.382775	0.999911
ENSG00000114861	FOXP1	protein_coding	forkhead box P1	226.795	1.00201	0.708393	1.41449	0.157219	0.803108
ENSG00000224570	AC097063.1	processed_pseudogene		0.208661	16.4939	4.64731	3.54913	0.00038651	0.00626219
ENSG00000179632	MAF1	protein_coding	MAF1 homolog, negative regulator of RNA polymerase III	31177	0.0701126	0.172023	0.407578	0.683584	0.999962
ENSG00000138193	PLCE1	protein_coding	phospholipase C epsilon 1	172.522	4.88221	1.95146	2.50183	0.0123554	0.134669
ENSG00000240809	AC026877.1	processed_pseudogene		106.904	0.400161	0.541604	0.738845	0.460001	0.999962
ENSG00000152942	RAD17	protein_coding	RAD17 checkpoint clamp loader component	187.892	-1.71924	1.81813	-0.945611	0.344347	0.989184
ENSG00000158411	MITD1	protein_coding	microtubule interacting and trafficking domain containing 1	148.869	0.236864	0.719795	0.329072	0.742102	0.999962
ENSG00000172667	ZMAT3	protein_coding	zinc finger matrin-type 3	5777.96	-0.333423	0.341485	-0.976389	0.328872	0.989184
ENSG00000118363	SPCS2	protein_coding	signal peptidase complex subunit 2	2719.54	-0.170252	0.165811	-1.02678	0.304523	0.978029
ENSG00000273311	DGCR11	sense_intronic	DiGeorge syndrome critical region gene 11 (non-protein coding)	177.816	-0.429672	0.476806	-0.901146	0.367511	0.997681
ENSG00000135903	PAX3	protein_coding	paired box 3	5077.84	-0.309763	0.208102	-1.48851	0.136615	0.749458
ENSG00000121644	DESI2	protein_coding	desumoylating isopeptidase 2	2807.13	-0.371746	0.32483	-1.14443	0.252444	0.949576
ENSG00000205362	MT1A	protein_coding	metallothionein 1A	11.4345	0.418008	2.18644	0.191182	0.848383	0.999962
ENSG00000138495	COX17	protein_coding	COX17, cytochrome c oxidase copper chaperone	1653.11	0.272718	0.23954	1.13851	0.254909	0.951377
ENSG00000169992	NLGN2	protein_coding	neuroligin 2	8181.45	0.122128	0.194093	0.629227	0.529201	0.999962
ENSG00000101323	HAO1	protein_coding	hydroxyacid oxidase 1	0.475766	16.5826	4.64712	3.56835	0.000359233	0.00604617
ENSG00000127564	PKMYT1	protein_coding	protein kinase, membrane associated tyrosine/threonine 1	16900.1	-0.0695815	0.227436	-0.30594	0.759651	0.999962
ENSG00000277998	AC107075.1	unprocessed_pseudogene		4.62825	1.62146	1.68613	0.961647	0.336227	0.989184
ENSG00000226086	EIF3LP3	processed_pseudogene	eukaryotic translation initiation factor 3 subunit L pseudogene 3	20.8352	-0.321629	1.15134	-0.279351	0.779975	0.999962
ENSG00000176973	FAM89B	protein_coding	family with sequence similarity 89 member B	15994.1	0.561839	0.272944	2.05844	0.0395479	0.343307
ENSG00000159479	MED8	protein_coding	mediator complex subunit 8	1367.65	0.0019768	0.18321	0.0107898	0.991391	0.999962
ENSG00000112511	PHF1	protein_coding	PHD finger protein 1	3189.56	-0.0645748	0.314776	-0.205145	0.837459	0.999962
ENSG00000231062	AC103563.2	antisense		2.09518	-1.23129	4.61961	-0.266537	0.789826	0.999962
ENSG00000154511	FAM69A	protein_coding	family with sequence similarity 69 member A	702.175	-0.220604	0.289434	-0.762193	0.445945	0.999962
ENSG00000144504	ANKMY1	protein_coding	ankyrin repeat and MYND domain containing 1	780.421	0.412377	0.223616	1.84413	0.0651646	0.487821
ENSG00000142507	PSMB6	protein_coding	proteasome subunit beta 6	10811.7	0.186894	0.19837	0.942149	0.346116	0.989184
ENSG00000197019	SERTAD1	protein_coding	SERTA domain containing 1	3840.86	0.0934986	0.184931	0.505586	0.613147	0.999962
ENSG00000164116	GUCY1A1	protein_coding	guanylate cyclase 1 soluble subunit alpha 1	49.4814	3.65166	1.77467	2.05765	0.0396233	0.343742
ENSG00000273305	AC009237.15	lincRNA		0.973695	-7.27817	4.59451	-1.5841	0.11317	0.681046
ENSG00000250927	MESTP3	processed_pseudogene	mesoderm specific transcript pseudogene 3	0.35767	-4.21543	4.67466	-0.901761	0.367184	0.997681
ENSG00000174013	FBXO45	protein_coding	F-box protein 45	553.307	-0.358413	0.518004	-0.691911	0.488993	0.999962
ENSG00000196704	AMZ2	protein_coding	archaelysin family metallopeptidase 2	1610.28	0.481555	0.289009	1.66623	0.0956677	0.618387
ENSG00000259235	AC066612.1	lincRNA		1.42524	-11.5953	4.67466	-2.48046	0.0131214	0.141044
ENSG00000238198	AL357055.3	lincRNA		1.67969	0.694381	4.57785	0.151683	0.879437	0.999962
ENSG00000178821	TMEM52	protein_coding	transmembrane protein 52	95.282	0.653807	0.513404	1.27348	0.202849	0.898187
ENSG00000196126	HLA-DRB1	protein_coding	major histocompatibility complex, class II, DR beta 1	170.048	1.45658	1.11837	1.30242	0.192774	0.877884
ENSG00000176928	GCNT4	protein_coding	glucosaminyl (N-acetyl) transferase 4, core 2	70.1418	0.979364	0.905034	1.08213	0.279195	0.963912
ENSG00000034239	EFCAB1	protein_coding	EF-hand calcium binding domain 1	21.7879	-0.375365	1.06427	-0.352698	0.724315	0.999962
ENSG00000165416	SUGT1	protein_coding	SGT1 homolog, MIS12 kinetochore complex assembly cochaperone	559.177	-0.277899	0.428047	-0.649226	0.516193	0.999962
ENSG00000254672	AL136146.1	processed_pseudogene		1.24422	0.56357	4.57618	0.123153	0.901986	0.999962
ENSG00000213471	TTLL13P	protein_coding	tubulin tyrosine ligase like 13, pseudogene	3.48106	-1.01201	3.40035	-0.297618	0.765995	0.999962
ENSG00000143033	MTF2	protein_coding	metal response element binding transcription factor 2	198.609	-0.0453361	0.856824	-0.0529119	0.957802	0.999962
ENSG00000257941	AC011611.5	processed_pseudogene		0.54916	-17.7277	4.64865	-3.81351	0.000137008	0.00311629
ENSG00000259956	RBM15B	protein_coding	RNA binding motif protein 15B	13156.6	-0.0342336	0.162139	-0.211138	0.83278	0.999962
ENSG00000177133	LINC00982	antisense	long intergenic non-protein coding RNA 982	4.0496	-1.06102	3.82055	-0.277715	0.781231	0.999962
ENSG00000213599	SLX1A-SULT1A3	processed_transcript	SLX1A-SULT1A3 readthrough (NMD candidate)	439.728	-0.370748	0.576801	-0.642766	0.520376	0.999962
ENSG00000268140	PCGF7P	processed_pseudogene	polycomb group ring finger 7 pseudogene	31.6479	-0.135915	0.875712	-0.155205	0.87666	0.999962
ENSG00000278987	AL031009.1	TEC		16.2373	-0.403706	1.47478	-0.273739	0.784285	0.999962
ENSG00000225352	RPL31P53	processed_pseudogene	ribosomal protein L31 pseudogene 53	1.11668	-4.51662	4.67466	-0.966192	0.333948	0.989184
ENSG00000267601	AC022966.1	antisense		0.698217	0.0228735	4.66453	0.00490371	0.996087	0.999962
ENSG00000245667	AC006064.1	antisense		6.22572	-2.81638	2.38096	-1.18288	0.236858	0.945341
ENSG00000203818	HIST2H3PS2	protein_coding	histone cluster 2 H3 pseudogene 2	44.8317	0.0755658	1.14347	0.0660846	0.94731	0.999962
ENSG00000196296	ATP2A1	protein_coding	ATPase sarcoplasmic/endoplasmic reticulum Ca2+ transporting 1	67.934	-1.02064	0.689824	-1.47957	0.138989	0.755797
ENSG00000145536	ADAMTS16	protein_coding	ADAM metallopeptidase with thrombospondin type 1 motif 16	30.3699	0.536042	1.11693	0.479923	0.631282	0.999962
ENSG00000279123	AC027281.2	TEC		3.82143	0.606577	2.96386	0.204658	0.837839	0.999962
ENSG00000109805	NCAPG	protein_coding	non-SMC condensin I complex subunit G	335.582	-0.0480084	0.905686	-0.0530078	0.957726	0.999962
ENSG00000240489	SETP14	processed_pseudogene	SET pseudogene 14	78.6163	0.249102	0.605236	0.411578	0.680649	0.999962
ENSG00000262519	TXNP4	processed_pseudogene	thioredoxin pseudogene 4	5.49077	1.6404	1.64826	0.995229	0.319625	0.989184
ENSG00000196748	CLPSL2	protein_coding	colipase like 2	0.347348	0.018021	4.67466	0.00385505	0.996924	0.999962
ENSG00000273723	AL139089.1	lincRNA		16.6513	-1.82378	1.7231	-1.05843	0.289859	0.96587
ENSG00000163975	MELTF	protein_coding	melanotransferrin	97688.4	0.180271	0.209915	0.858781	0.390462	0.999962
ENSG00000270720	AC104785.1	lincRNA		4.29408	3.28896	3.05623	1.07615	0.28186	0.963912
ENSG00000127329	PTPRB	protein_coding	protein tyrosine phosphatase, receptor type B	13.1218	3.27475	2.39302	1.36846	0.171168	0.834825
ENSG00000262358	AC116914.1	antisense		3.31121	1.88738	3.29627	0.572581	0.566928	0.999962
ENSG00000143183	TMCO1	protein_coding	transmembrane and coiled-coil domains 1	1854.97	-0.107111	0.275825	-0.38833	0.697772	0.999962
ENSG00000108774	RAB5C	protein_coding	RAB5C, member RAS oncogene family	21518.2	-0.0193721	0.263154	-0.0736151	0.941317	0.999962
ENSG00000183696	UPP1	protein_coding	uridine phosphorylase 1	19775.3	0.374846	0.193048	1.94172	0.0521708	0.419475
ENSG00000235944	ZNF815P	transcribed_unprocessed_pseudogene	zinc finger protein 815, pseudogene	138.014	-0.518758	0.418336	-1.24005	0.214956	0.920512
ENSG00000228318	AP001610.1	antisense		2.17907	-1.32787	4.61996	-0.287419	0.773791	0.999962
ENSG00000279859	AC093323.2	TEC		0.557657	15.8629	4.62665	3.42859	0.000606716	0.00914403
ENSG00000269680	AC008760.1	antisense		2.60127	-1.06731	4.61643	-0.231197	0.817161	0.999962
ENSG00000269113	TRABD2B	protein_coding	TraB domain containing 2B	5.06144	1.49289	4.61973	0.323156	0.746577	0.999962
ENSG00000268442	HAVCR1P1	processed_pseudogene	hepatitis A virus cellular receptor 1 pseudogene 1	0.238469	16.8432	4.64703	3.6245	0.000289519	0.00529469
ENSG00000227879	PSPC1P1	unprocessed_pseudogene	paraspeckle component 1 pseudogene 1	2.77171	-0.222259	4.47666	-0.0496484	0.960403	0.999962
ENSG00000272512	AL645608.8	lincRNA		27.2783	0.302951	1.44404	0.209793	0.833829	0.999962
ENSG00000117139	KDM5B	protein_coding	lysine demethylase 5B	1964.89	-0.222311	0.287668	-0.772805	0.439638	0.999962
ENSG00000001460	STPG1	protein_coding	sperm tail PG-rich repeat containing 1	1796.34	-0.0540595	0.251192	-0.215212	0.829602	0.999962
ENSG00000268434	AC011530.1	protein_coding		14.1999	2.06146	1.61716	1.27474	0.202401	0.897224
ENSG00000265806	MIR4292	miRNA	microRNA 4292	21.6624	-0.380097	0.77858	-0.488192	0.625414	0.999962
ENSG00000080031	PTPRH	protein_coding	protein tyrosine phosphatase, receptor type H	2217.92	-0.00229305	0.219865	-0.0104294	0.991679	0.999962
ENSG00000168300	PCMTD1	protein_coding	protein-L-isoaspartate (D-aspartate) O-methyltransferase domain containing 1	247.064	0.738481	0.461345	1.60071	0.109441	0.669566
ENSG00000279419	AC004925.1	TEC		4.48336	-0.0327923	3.83885	-0.00854222	0.993184	0.999962
ENSG00000145451	GLRA3	protein_coding	glycine receptor alpha 3	10.1736	1.85691	4.57787	0.405627	0.685017	0.999962
ENSG00000268947	AC002128.1	sense_intronic		28.3394	-0.315718	1.14765	-0.2751	0.783239	0.999962
ENSG00000231982	AC112907.2	unprocessed_pseudogene		20.5182	-0.715344	1.01474	-0.704954	0.480839	0.999962
ENSG00000173702	MUC13	protein_coding	mucin 13, cell surface associated	713.589	1.18367	1.1369	1.04114	0.297811	0.972239
ENSG00000258509	AL049870.1	processed_pseudogene		6.3226	-0.650411	1.48007	-0.439445	0.660339	0.999962
ENSG00000227097	RPS28P7	processed_pseudogene	ribosomal protein S28 pseudogene 7	6068.74	-0.0989581	0.224112	-0.441557	0.65881	0.999962
ENSG00000276180	HIST1H4I	protein_coding	histone cluster 1 H4 family member i	120.49	0.0183616	0.393083	0.0467118	0.962743	0.999962
ENSG00000106125	MINDY4	protein_coding	MINDY lysine 48 deubiquitinase 4	195.632	-1.58831	1.09288	-1.45333	0.146133	0.773145
ENSG00000076984	MAP2K7	protein_coding	mitogen-activated protein kinase kinase 7	6302.67	-0.0996278	0.256931	-0.387761	0.698193	0.999962
ENSG00000271824	SMIM32	protein_coding	small integral membrane protein 32	31.3792	3.01233	1.52541	1.97477	0.0482944	0.39602
ENSG00000133624	ZNF767P	transcribed_unprocessed_pseudogene	zinc finger family member 767, pseudogene	128.831	-0.249796	0.575479	-0.434067	0.66424	0.999962
ENSG00000267634	RPL7L1P5	processed_pseudogene	ribosomal protein L7 like 1 pseudogene 5	0.311624	-5.18869	4.67466	-1.10996	0.267016	0.960199
ENSG00000212724	KRTAP2-3	protein_coding	keratin associated protein 2-3	3.21216	-1.53006	2.46329	-0.621145	0.534504	0.999962
ENSG00000221539	SNORD99	snoRNA	small nucleolar RNA, C/D box 99	3.52339	1.40503	2.43215	0.57769	0.563474	0.999962
ENSG00000231305	AC112484.1	antisense		5.63537	-4.33942	2.44997	-1.77121	0.0765253	0.539672
ENSG00000160201	U2AF1	protein_coding	U2 small nuclear RNA auxiliary factor 1	2930.54	0.0131179	0.311183	0.0421551	0.966375	0.999962
ENSG00000261654	AL360270.2	sense_overlapping		2.02161	-16.7832	4.61701	-3.63507	0.000277909	0.00517617
ENSG00000251615	AC104825.1	lincRNA		29.5188	-0.191362	1.1254	-0.170039	0.864979	0.999962
ENSG00000125743	SNRPD2	protein_coding	small nuclear ribonucleoprotein D2 polypeptide	4153.02	0.0447548	0.300913	0.14873	0.881767	0.999962
ENSG00000241537	AC134050.1	processed_pseudogene		0.564441	0.0180135	4.67466	0.00385343	0.996925	0.999962
ENSG00000220256	AC093802.1	lincRNA		0.444772	17.4795	4.64768	3.76091	0.000169297	0.00365255
ENSG00000212497	RNA5SP465	rRNA	RNA, 5S ribosomal pseudogene 465	0.267107	-5.0627	4.67466	-1.08301	0.278805	0.963912
ENSG00000261840	AC093249.6	antisense		114.241	-0.13322	0.425268	-0.313261	0.754082	0.999962
ENSG00000234769	WASH4P	unprocessed_pseudogene	WAS protein family homolog 4 pseudogene	655.633	0.144831	0.573625	0.252483	0.800668	0.999962
ENSG00000154258	ABCA9	protein_coding	ATP binding cassette subfamily A member 9	0.40066	-5.33652	4.67466	-1.14158	0.253627	0.949576
ENSG00000261399	AL031710.1	antisense		1.40259	-2.39986	4.6039	-0.521267	0.602181	0.999962
ENSG00000174567	GOLT1A	protein_coding	golgi transport 1A	9.22065	16.6455	3.8606	4.31164	1.6205e-05	0.001093
ENSG00000240877	RN7SL521P	misc_RNA	RNA, 7SL, cytoplasmic 521, pseudogene	12.4531	-1.83804	1.15394	-1.59284	0.111196	0.674527
ENSG00000278126	AC139768.1	sense_intronic		142.47	-0.163067	0.80513	-0.202534	0.839499	0.999962
ENSG00000009724	MASP2	protein_coding	mannan binding lectin serine peptidase 2	17.7872	-1.38485	2.34308	-0.591039	0.554494	0.999962
ENSG00000237424	FOXD2-AS1	lincRNA	FOXD2 adjacent opposite strand RNA 1	902.136	-0.137096	0.270321	-0.507159	0.612043	0.999962
ENSG00000105048	TNNT1	protein_coding	troponin T1, slow skeletal type	875.206	-0.404014	0.245733	-1.64412	0.100152	0.636947
ENSG00000275591	XKR5	protein_coding	XK related 5	77.9041	0.363987	1.04247	0.349158	0.726971	0.999962
ENSG00000134072	CAMK1	protein_coding	calcium/calmodulin dependent protein kinase I	1154.72	0.343327	0.262608	1.30738	0.191085	0.874223
ENSG00000205899	BHLHA9	protein_coding	basic helix-loop-helix family member a9	5.38465	5.82812	3.99331	1.45947	0.144435	0.768545
ENSG00000005187	ACSM3	protein_coding	acyl-CoA synthetase medium chain family member 3	21.6084	-1.01848	2.26418	-0.449824	0.652838	0.999962
ENSG00000147324	MFHAS1	protein_coding	malignant fibrous histiocytoma amplified sequence 1	1868.35	-0.428658	0.244036	-1.75654	0.0789971	0.550093
ENSG00000178075	GRAMD1C	protein_coding	GRAM domain containing 1C	47.5215	-0.405616	0.802411	-0.505496	0.61321	0.999962
ENSG00000103175	WFDC1	protein_coding	WAP four-disulfide core domain 1	15907.2	0.0568809	0.429474	0.132443	0.894634	0.999962
ENSG00000108443	RPS6KB1	protein_coding	ribosomal protein S6 kinase B1	289.97	0.94682	0.564911	1.67605	0.0937278	0.610739
ENSG00000272734	ADIRF-AS1	processed_transcript	ADIRF antisense RNA 1	164.189	-0.147442	0.391187	-0.37691	0.706241	0.999962
ENSG00000233006	MIR3936HG	processed_transcript	MIR3936 host gene	22.4901	0.16286	0.885314	0.183958	0.854047	0.999962
ENSG00000152049	KCNE4	protein_coding	potassium voltage-gated channel subfamily E regulatory subunit 4	4539.48	-0.350733	0.209171	-1.67677	0.0935867	0.610374
ENSG00000230707	AL589987.1	processed_pseudogene		87.5984	0.39574	0.496142	0.797635	0.425083	0.999962
ENSG00000275017	AL353748.2	processed_pseudogene		1.46472	-1.32154	4.6234	-0.285837	0.775003	0.999962
ENSG00000255153	TOLLIP-AS1	antisense	TOLLIP antisense RNA 1 (head to head)	281.906	-0.215274	0.349455	-0.616028	0.537876	0.999962
ENSG00000261663	AC009065.8	antisense		44.8908	0.408473	1.15125	0.354807	0.722734	0.999962
ENSG00000249996	AC106786.2	antisense		1.47572	-18.5533	4.62115	-4.01486	5.94811e-05	0.00218639
ENSG00000253829	AC067817.2	antisense		1.38698	4.04839	4.56987	0.885888	0.375678	0.999059
ENSG00000282041	Z82244.1	lincRNA		1.85123	-0.958448	4.6212	-0.207402	0.835696	0.999962
ENSG00000175309	PHYKPL	protein_coding	5-phosphohydroxy-L-lysine phospho-lyase	1430.38	-0.546711	0.218692	-2.49992	0.0124222	0.13512
ENSG00000264438	RN7SL560P	misc_RNA	RNA, 7SL, cytoplasmic 560, pseudogene	0.325326	-4.47808	4.67466	-0.957948	0.338089	0.989184
ENSG00000232004	CAP1P2	processed_pseudogene	CAP1 pseudogene 2	112.535	-0.449981	0.542404	-0.829605	0.406762	0.999962
ENSG00000231203	KRT8P10	processed_pseudogene	keratin 8 pseudogene 10	11.594	-1.6986	1.20279	-1.41222	0.157884	0.803535
ENSG00000011052	NME1-NME2	protein_coding	NME1-NME2 readthrough	6907.24	0.0944627	1.44696	0.0652836	0.947948	0.999962
ENSG00000110395	CBL	protein_coding	Cbl proto-oncogene	2767.14	-0.93976	0.531083	-1.76952	0.0768077	0.54067
ENSG00000112305	SMAP1	protein_coding	small ArfGAP 1	528.895	-0.278788	0.454712	-0.61311	0.539803	0.999962
ENSG00000254131	AC093367.1	processed_pseudogene		1.77402	-5.18042	4.67466	-1.10819	0.267779	0.961298
ENSG00000128973	CLN6	protein_coding	CLN6, transmembrane ER protein	29563.9	-0.00388029	0.176093	-0.0220354	0.98242	0.999962
ENSG00000107018	RLN1	protein_coding	relaxin 1	5.11546	-1.12029	3.40906	-0.32862	0.742443	0.999962
ENSG00000270587	AC046185.2	processed_pseudogene		27.6327	-0.652579	1.20099	-0.54337	0.586875	0.999962
ENSG00000260799	KRT8P50	processed_pseudogene	keratin 8 pseudogene 50	2.81853	6.34212	4.57409	1.38653	0.165584	0.820364
ENSG00000241429	EEF1A1P25	processed_pseudogene	eukaryotic translation elongation factor 1 alpha 1 pseudogene 25	104.625	0.34307	0.429393	0.798964	0.424311	0.999962
ENSG00000260743	AC007823.1	lincRNA		2.93983	-9.90907	4.59747	-2.15533	0.031136	0.287346
ENSG00000282772	AL358790.1	antisense		13.0244	-3.12096	1.89146	-1.65003	0.0989376	0.631666
ENSG00000167880	EVPL	protein_coding	envoplakin	12.3536	1.34493	3.35824	0.400486	0.688799	0.999962
ENSG00000139656	SMIM2	protein_coding	small integral membrane protein 2	0.440978	-14.8088	4.66805	-3.17237	0.00151201	0.0206211
ENSG00000139988	RDH12	protein_coding	retinol dehydrogenase 12 (all-trans/9-cis/11-cis)	9.60427	1.75557	1.65666	1.0597	0.289281	0.965297
ENSG00000104998	IL27RA	protein_coding	interleukin 27 receptor subunit alpha	554.603	0.0149673	0.258428	0.0579167	0.953815	0.999962
ENSG00000230806	SRGAP2-AS1	antisense	SRGAP2 antisense RNA 1	0.566212	0.10371	4.66392	0.0222366	0.982259	0.999962
ENSG00000082068	WDR70	protein_coding	WD repeat domain 70	302.483	-0.321796	0.435338	-0.739188	0.459793	0.999962
ENSG00000235204	AL162724.2	antisense		3.45851	2.36554	3.32545	0.711344	0.476871	0.999962
ENSG00000136319	TTC5	protein_coding	tetratricopeptide repeat domain 5	1275.32	-0.365079	0.229583	-1.59018	0.111793	0.676834
ENSG00000235795	AC093157.2	antisense		2.27706	-1.95702	4.57468	-0.427793	0.668802	0.999962
ENSG00000153044	CENPH	protein_coding	centromere protein H	204.328	0.0848284	0.508466	0.166832	0.867502	0.999962
ENSG00000255774	AP000439.2	lincRNA		0.83076	-14.404	4.67466	-3.0813	0.00206099	0.027183
ENSG00000226544	RPL7P22	processed_pseudogene	ribosomal protein L7 pseudogene 22	8.47898	-1.47148	1.05614	-1.39327	0.163539	0.815124
ENSG00000249915	PDCD6	protein_coding	programmed cell death 6	4977	-0.113013	0.158135	-0.714663	0.474817	0.999962
ENSG00000079819	EPB41L2	protein_coding	erythrocyte membrane protein band 4.1 like 2	521.878	0.0641847	0.54917	0.116876	0.906958	0.999962
ENSG00000197927	C2orf27A	transcribed_unprocessed_pseudogene	chromosome 2 open reading frame 27A	8.16619	5.65693	2.65123	2.1337	0.0328675	0.299835
ENSG00000143793	C1orf35	protein_coding	chromosome 1 open reading frame 35	2698.93	0.157797	0.174465	0.904462	0.365751	0.997681
ENSG00000134333	LDHA	protein_coding	lactate dehydrogenase A	20436.8	-0.0683515	0.253127	-0.270028	0.787138	0.999962
ENSG00000277250	RF00017	misc_RNA		0.30393	0.0180231	4.67466	0.00385549	0.996924	0.999962
ENSG00000114062	UBE3A	protein_coding	ubiquitin protein ligase E3A	929.823	-0.0201715	0.382155	-0.0527835	0.957904	0.999962
ENSG00000119772	DNMT3A	protein_coding	DNA methyltransferase 3 alpha	2730.99	-0.178941	0.219151	-0.816519	0.414203	0.999962
ENSG00000213509	PPIAP16	processed_pseudogene	peptidylprolyl isomerase A pseudogene 16	1.49437	-1.02571	2.02606	-0.506258	0.612675	0.999962
ENSG00000138735	PDE5A	protein_coding	phosphodiesterase 5A	193.215	-0.341954	0.73264	-0.466743	0.640684	0.999962
ENSG00000274021	AC024909.2	antisense		279.219	0.394698	0.823485	0.479302	0.631724	0.999962
ENSG00000271180	AL158801.4	processed_pseudogene		4.30603	-0.722403	2.37463	-0.304217	0.760963	0.999962
ENSG00000280186	AL359258.3	TEC		20.897	-0.30307	1.67945	-0.180458	0.856793	0.999962
ENSG00000131845	ZNF304	protein_coding	zinc finger protein 304	318.249	-0.32832	0.326231	-1.0064	0.314221	0.986968
ENSG00000196655	TRAPPC4	protein_coding	trafficking protein particle complex 4	2637.61	0.195522	0.204307	0.957001	0.338567	0.989184
ENSG00000054598	FOXC1	protein_coding	forkhead box C1	81.7615	0.0614047	0.38952	0.157642	0.874739	0.999962
ENSG00000166896	ATP23	protein_coding	ATP23 metallopeptidase and ATP synthase assembly factor homolog	73.3517	-5.93443	1.70097	-3.48884	0.000485118	0.00754508
ENSG00000280007	AC008079.2	antisense		97.3777	0.212421	0.428789	0.495399	0.620318	0.999962
ENSG00000180447	GAS1	protein_coding	growth arrest specific 1	1833.53	0.196044	0.20467	0.957853	0.338137	0.989184
ENSG00000185839	AL035411.1	processed_pseudogene		132.191	0.163283	0.376548	0.43363	0.664557	0.999962
ENSG00000257151	PWAR6	lincRNA	Prader Willi/Angelman region RNA 6	21.727	1.10746	2.23121	0.496351	0.619647	0.999962
ENSG00000228696	ARL17B	protein_coding	ADP ribosylation factor like GTPase 17B	61.9262	0.647863	1.2124	0.534366	0.593088	0.999962
ENSG00000118094	TREH	protein_coding	trehalase	0.414292	0.103014	4.66815	0.0220675	0.982394	0.999962
ENSG00000245750	DRAIC	lincRNA	downregulated RNA in cancer, inhibitor of cell invasion and migration	4.06435	1.55171	4.49705	0.34505	0.730057	0.999962
ENSG00000133958	UNC79	protein_coding	unc-79 homolog, NALCN channel complex subunit	43.6203	3.49708	1.35668	2.57767	0.00994699	0.111679
ENSG00000146535	GNA12	protein_coding	G protein subunit alpha 12	14578.4	0.0929867	0.179729	0.517372	0.604897	0.999962
ENSG00000168306	ACOX2	protein_coding	acyl-CoA oxidase 2	0.447852	0.334767	4.62627	0.0723622	0.942314	0.999962
ENSG00000064102	INTS13	protein_coding	integrator complex subunit 13	240.867	0.252874	0.884404	0.285926	0.774935	0.999962
ENSG00000168070	MAJIN	protein_coding	membrane anchored junction protein	0.637761	16.8246	4.64628	3.62108	0.000293371	0.0053365
ENSG00000148426	PROSER2	protein_coding	proline and serine rich 2	621.355	-0.011389	0.272648	-0.0417719	0.966681	0.999962
ENSG00000115685	PPP1R7	protein_coding	protein phosphatase 1 regulatory subunit 7	1914.87	0.0427745	0.136665	0.312988	0.75429	0.999962
ENSG00000122566	HNRNPA2B1	protein_coding	heterogeneous nuclear ribonucleoprotein A2/B1	11320.1	-0.0444111	0.297962	-0.14905	0.881515	0.999962
ENSG00000255248	MIR100HG	processed_transcript	mir-100-let-7a-2-mir-125b-1 cluster host gene	41.024	-0.57319	0.934497	-0.613367	0.539634	0.999962
ENSG00000130649	CYP2E1	protein_coding	cytochrome P450 family 2 subfamily E member 1	7.52761	0.99351	3.17527	0.31289	0.754364	0.999962
ENSG00000255535	AP003041.2	processed_pseudogene		2.18577	-4.3912	4.67466	-0.939361	0.347545	0.99133
ENSG00000100029	PES1	protein_coding	pescadillo ribosomal biogenesis factor 1	12933.7	0.0965157	0.205535	0.469583	0.638653	0.999962
ENSG00000259248	USP3-AS1	antisense	USP3 antisense RNA 1	3.57921	-2.29453	3.29223	-0.696953	0.485832	0.999962
ENSG00000228929	RPS13P2	processed_pseudogene	ribosomal protein S13 pseudogene 2	378.527	0.0868009	0.298126	0.291155	0.770933	0.999962
ENSG00000119471	HSDL2	protein_coding	hydroxysteroid dehydrogenase like 2	695.219	-0.139648	0.508899	-0.274412	0.783768	0.999962
ENSG00000132300	PTCD3	protein_coding	pentatricopeptide repeat domain 3	1409.33	0.105763	0.395894	0.26715	0.789354	0.999962
ENSG00000175894	TSPEAR	protein_coding	thrombospondin type laminin G domain and EAR repeats	3.44787	2.22198	4.61248	0.481732	0.629996	0.999962
ENSG00000126698	DNAJC8	protein_coding	DnaJ heat shock protein family (Hsp40) member C8	1159.84	-0.212403	0.420855	-0.504693	0.613774	0.999962
ENSG00000164366	CCDC127	protein_coding	coiled-coil domain containing 127	2055.58	0.136342	0.206204	0.6612	0.508484	0.999962
ENSG00000229107	ABHD17AP4	processed_pseudogene	abhydrolase domain containing 17A pseudogene P4	484.022	0.261826	1.2983	0.201669	0.840176	0.999962
ENSG00000213777	AC011487.1	transcribed_processed_pseudogene		4.97835	-2.16384	3.6185	-0.597993	0.549845	0.999962
ENSG00000279525	AC002451.2	TEC		1.26517	16.4695	4.62453	3.56134	0.000368962	0.00617179
ENSG00000207041	RNU6-3P	snRNA	RNA, U6 small nuclear 3, pseudogene	1.80546	0.445662	1.98375	0.224657	0.822246	0.999962
ENSG00000162076	FLYWCH2	protein_coding	FLYWCH family member 2	3203.29	0.125562	0.198662	0.632038	0.527362	0.999962
ENSG00000182667	NTM	protein_coding	neurotrimin	260.864	1.10394	0.493798	2.23561	0.0253774	0.245738
ENSG00000130520	LSM4	protein_coding	LSM4 homolog, U6 small nuclear RNA and mRNA degradation associated	24877.2	-0.0224149	0.269617	-0.0831362	0.933743	0.999962
ENSG00000229117	RPL41	protein_coding	ribosomal protein L41	7850.65	-0.295744	0.540898	-0.546765	0.58454	0.999962
ENSG00000225675	LINC01771	lincRNA	long intergenic non-protein coding RNA 1771	0.765709	-17.833	4.62598	-3.85496	0.000115747	0.00281511
ENSG00000227372	TP73-AS1	transcribed_unitary_pseudogene	TP73 antisense RNA 1	2790.1	-0.202835	0.293424	-0.691268	0.489397	0.999962
ENSG00000218358	RAET1K	transcribed_unprocessed_pseudogene	retinoic acid early transcript 1K pseudogene	0.836803	-4.85724	4.67466	-1.03906	0.298779	0.972342
ENSG00000057149	SERPINB3	protein_coding	serpin family B member 3	3.57102	0.262621	4.6184	0.056864	0.954654	0.999962
ENSG00000184961	RPL7AP49	processed_pseudogene	ribosomal protein L7a pseudogene 49	1.20294	1.5052	3.78016	0.398183	0.690495	0.999962
ENSG00000100628	ASB2	protein_coding	ankyrin repeat and SOCS box containing 2	1695.48	-0.132132	0.205505	-0.642962	0.520249	0.999962
ENSG00000243250	RPS6P16	processed_pseudogene	ribosomal protein S6 pseudogene 16	0.485708	-1.21672	4.63151	-0.262706	0.792777	0.999962
ENSG00000231795	ITCH-IT1	sense_intronic	ITCH intronic transcript 1	0.279268	1.51051	4.64594	0.325124	0.745087	0.999962
ENSG00000173272	MZT2A	protein_coding	mitotic spindle organizing protein 2A	10336	0.244457	0.156543	1.56159	0.118384	0.695675
ENSG00000131508	UBE2D2	protein_coding	ubiquitin conjugating enzyme E2 D2	7243.32	0.0680084	0.147455	0.461213	0.644646	0.999962
ENSG00000075914	EXOSC7	protein_coding	exosome component 7	1909.93	0.2352	0.219097	1.0735	0.283048	0.963912
ENSG00000132031	MATN3	protein_coding	matrilin 3	64.7842	-0.266154	1.26628	-0.210185	0.833523	0.999962
ENSG00000267080	ASB16-AS1	antisense	ASB16 antisense RNA 1	488.373	0.100051	0.399218	0.250617	0.80211	0.999962
ENSG00000197444	OGDHL	protein_coding	oxoglutarate dehydrogenase like	37.9606	2.31183	1.57619	1.46672	0.142452	0.76383
ENSG00000007952	NOX1	protein_coding	NADPH oxidase 1	3.92016	-0.020566	3.5002	-0.00587567	0.995312	0.999962
ENSG00000249908	BRD9P2	unprocessed_pseudogene	bromodomain containing 9 pseudogene 2	2.49358	-1.55081	3.62613	-0.427677	0.668886	0.999962
ENSG00000158483	FAM86C1	protein_coding	family with sequence similarity 86 member C1	746.142	-0.0140973	0.338626	-0.0416308	0.966793	0.999962
ENSG00000212961	HNRNPA1P40	processed_pseudogene	heterogeneous nuclear ribonucleoprotein A1 pseudogene 40	1.06164	-14.1164	4.67466	-3.01977	0.00252967	0.0324229
ENSG00000171806	METTL18	protein_coding	methyltransferase like 18	80.2502	0.4856	0.968708	0.501287	0.616169	0.999962
ENSG00000165195	PIGA	protein_coding	phosphatidylinositol glycan anchor biosynthesis class A	447.888	-0.0801103	0.329301	-0.243274	0.807793	0.999962
ENSG00000070444	MNT	protein_coding	MAX network transcriptional repressor	5490.47	-0.192171	0.1938	-0.991591	0.321397	0.989184
ENSG00000218227	AC136632.1	processed_pseudogene		85.7666	0.394236	0.307857	1.28058	0.20034	0.893016
ENSG00000066697	MSANTD3	protein_coding	Myb/SANT DNA binding domain containing 3	2384.81	-0.0559527	0.143906	-0.388816	0.697413	0.999962
ENSG00000265574	WDR45BP1	processed_pseudogene	WD repeat domain 45B pseudogene 1	40.2851	0.0430249	0.5893	0.0730103	0.941798	0.999962
ENSG00000227329	AL139396.1	processed_pseudogene		0.430976	-19.0345	4.64638	-4.09664	4.19198e-05	0.00182763
ENSG00000237390	AL139130.1	lincRNA		1.14584	-12.4393	4.67466	-2.66101	0.00779074	0.0896494
ENSG00000083444	PLOD1	protein_coding	procollagen-lysine,2-oxoglutarate 5-dioxygenase 1	56723.9	0.0759722	0.204435	0.371621	0.710175	0.999962
ENSG00000182613	OR2V2	protein_coding	olfactory receptor family 2 subfamily V member 2	0.962105	0.0180117	4.67466	0.00385304	0.996926	0.999962
ENSG00000247775	SNCA-AS1	antisense	SNCA antisense RNA 1	2.26196	-0.595595	4.61886	-0.128948	0.897398	0.999962
ENSG00000246526	LINC002481	lincRNA	long intergenic non-protein coding RNA 2481	0.593029	17.0866	4.64703	3.67689	0.000236098	0.00464508
ENSG00000255458	AC108471.2	lincRNA		7.60942	5.18147	3.18858	1.62501	0.104161	0.651863
ENSG00000078618	NRDC	protein_coding	nardilysin convertase	2221.19	-0.311698	0.393942	-0.791228	0.428811	0.999962
ENSG00000145982	FARS2	protein_coding	phenylalanyl-tRNA synthetase 2, mitochondrial	1633.3	0.0173689	0.194021	0.0895207	0.928668	0.999962
ENSG00000274979	AC020656.2	lincRNA		1.25914	0.0180009	4.67466	0.00385075	0.996928	0.999962
ENSG00000181381	DDX60L	protein_coding	DExD/H-box 60 like	233.424	-0.0393647	0.346659	-0.113554	0.909591	0.999962
ENSG00000112303	VNN2	protein_coding	vanin 2	57.3325	-1.04579	1.9399	-0.539095	0.589821	0.999962
ENSG00000142552	RCN3	protein_coding	reticulocalbin 3	2446.88	0.196462	0.276245	0.711187	0.476968	0.999962
ENSG00000223663	NDUFB4P8	processed_pseudogene	NADH:ubiquinone oxidoreductase subunit B4 pseudogene 8	2.62129	0.40785	4.30387	0.0947637	0.924502	0.999962
ENSG00000139613	SMARCC2	protein_coding	SWI/SNF related, matrix associated, actin dependent regulator of chromatin subfamily c member 2	5681.58	-0.272037	0.192649	-1.41209	0.157923	0.803535
ENSG00000149923	PPP4C	protein_coding	protein phosphatase 4 catalytic subunit	18089.2	0.181015	0.177964	1.01715	0.309084	0.983433
ENSG00000231434	AL365440.1	processed_pseudogene		1.64744	1.24327	4.58542	0.271136	0.786287	0.999962
ENSG00000149925	ALDOA	protein_coding	aldolase, fructose-bisphosphate A	419396	0.154531	0.206738	0.747474	0.454778	0.999962
ENSG00000272079	AC004233.3	lincRNA		11.1061	-1.19736	2.99771	-0.399426	0.68958	0.999962
ENSG00000143882	ATP6V1C2	protein_coding	ATPase H+ transporting V1 subunit C2	87.8178	-0.948109	0.611279	-1.55103	0.120895	0.701221
ENSG00000271321	CTAGE6	protein_coding	CTAGE family member 6	8.5048	-0.432446	1.14541	-0.377548	0.705766	0.999962
ENSG00000144959	NCEH1	protein_coding	neutral cholesterol ester hydrolase 1	583.017	0.382906	0.475819	0.80473	0.420975	0.999962
ENSG00000197893	NRAP	protein_coding	nebulin related anchoring protein	3.15377	-2.75245	4.59352	-0.599202	0.549038	0.999962
ENSG00000159733	ZFYVE28	protein_coding	zinc finger FYVE-type containing 28	3887.63	0.188046	0.219726	0.855821	0.392097	0.999962
ENSG00000223864	NPM1P19	processed_pseudogene	nucleophosmin 1 pseudogene 19	0.687886	0.387344	4.33576	0.0893371	0.928814	0.999962
ENSG00000117602	RCAN3	protein_coding	RCAN family member 3	1745.19	-0.136474	0.278358	-0.490282	0.623934	0.999962
ENSG00000173276	ZBTB21	protein_coding	zinc finger and BTB domain containing 21	395.553	-0.0662679	0.514287	-0.128854	0.897473	0.999962
ENSG00000139531	SUOX	protein_coding	sulfite oxidase	3265.03	0.358704	0.509871	0.703519	0.481733	0.999962
ENSG00000163376	KBTBD8	protein_coding	kelch repeat and BTB domain containing 8	21.1675	-0.398284	1.19796	-0.332468	0.739536	0.999962
ENSG00000101236	RNF24	protein_coding	ring finger protein 24	2443.58	-0.132834	0.292941	-0.453451	0.650224	0.999962
ENSG00000113360	DROSHA	protein_coding	drosha ribonuclease III	1214.62	-0.0320434	0.325993	-0.0982945	0.921698	0.999962
ENSG00000099385	BCL7C	protein_coding	BCL tumor suppressor 7C	8523.57	0.0795049	0.137138	0.579743	0.562088	0.999962
ENSG00000161904	LEMD2	protein_coding	LEM domain containing 2	9760.61	-0.0706935	0.19467	-0.363146	0.716496	0.999962
ENSG00000179111	HES7	protein_coding	hes family bHLH transcription factor 7	373.913	-0.083893	0.358917	-0.233739	0.815188	0.999962
ENSG00000170325	PRDM10	protein_coding	PR/SET domain 10	434.747	-0.44479	0.57495	-0.773615	0.439158	0.999962
ENSG00000214646	AC104758.1	transcribed_unprocessed_pseudogene		0.679581	-0.107792	4.64077	-0.0232271	0.981469	0.999962
ENSG00000104142	VPS18	protein_coding	VPS18, CORVET/HOPS core subunit	60960.7	-0.00862597	0.208742	-0.0413236	0.967038	0.999962
ENSG00000261504	LINC01686	lincRNA	long intergenic non-protein coding RNA 1686	9.8399	2.73943	2.0766	1.31919	0.187107	0.865321
ENSG00000230107	AL022316.1	lincRNA		0.933942	0.0180279	4.67466	0.00385651	0.996923	0.999962
ENSG00000156467	UQCRB	protein_coding	ubiquinol-cytochrome c reductase binding protein	1944.1	-0.145476	0.246211	-0.590859	0.554615	0.999962
ENSG00000256566	AL049650.1	protein_coding		9.22028	3.1555	2.2161	1.4239	0.154476	0.794959
ENSG00000224870	AL391244.1	processed_transcript		479.093	-0.586148	0.516228	-1.13545	0.256189	0.952502
ENSG00000204308	RNF5	protein_coding	ring finger protein 5	898.752	0.273048	0.223264	1.22298	0.221337	0.930093
ENSG00000169856	ONECUT1	protein_coding	one cut homeobox 1	20.2099	1.13749	1.8479	0.615557	0.538187	0.999962
ENSG00000168939	SPRY3	protein_coding	sprouty RTK signaling antagonist 3	26.8566	-4.16669	2.12327	-1.96239	0.0497168	0.403675
ENSG00000154447	SH3RF1	protein_coding	SH3 domain containing ring finger 1	654.168	0.113588	0.352169	0.322539	0.747044	0.999962
ENSG00000260281	ITFG1-AS1	antisense	ITFG1 antisense RNA 1	0.9994	-20.1623	4.62598	-4.35849	1.30964e-05	0.000944083
ENSG00000132964	CDK8	protein_coding	cyclin dependent kinase 8	451.772	0.213828	0.33727	0.633996	0.526083	0.999962
ENSG00000214612	RPS19P1	processed_pseudogene	ribosomal protein S19 pseudogene 1	2.25407	2.93869	3.73739	0.786294	0.431695	0.999962
ENSG00000183570	PCBP3	protein_coding	poly(rC) binding protein 3	196.395	-0.193113	0.462033	-0.417965	0.675973	0.999962
ENSG00000101680	LAMA1	protein_coding	laminin subunit alpha 1	2965.48	-0.257682	0.304431	-0.846436	0.39731	0.999962
ENSG00000111785	RIC8B	protein_coding	RIC8 guanine nucleotide exchange factor B	375.998	-0.126698	0.300533	-0.421578	0.673333	0.999962
ENSG00000187325	TAF9B	protein_coding	TATA-box binding protein associated factor 9b	578.956	-0.249644	0.603767	-0.413478	0.679257	0.999962
ENSG00000261279	ULK4P1	transcribed_unprocessed_pseudogene	ULK4 pseudogene 1	1.91668	-2.27975	2.52994	-0.901105	0.367532	0.997681
ENSG00000173846	PLK3	protein_coding	polo like kinase 3	2171.34	0.134696	0.198041	0.680144	0.496414	0.999962
ENSG00000168303	MPLKIP	protein_coding	M-phase specific PLK1 interacting protein	1858.48	0.107551	0.16947	0.634631	0.525669	0.999962
ENSG00000133027	PEMT	protein_coding	phosphatidylethanolamine N-methyltransferase	8546.9	0.0166355	0.219819	0.075678	0.939675	0.999962
ENSG00000126895	AVPR2	protein_coding	arginine vasopressin receptor 2	5.04432	-3.96083	3.66083	-1.08195	0.279275	0.963912
ENSG00000126562	WNK4	protein_coding	WNK lysine deficient protein kinase 4	41.802	-0.195566	0.606812	-0.322284	0.747238	0.999962
ENSG00000260628	AC142381.3	transcribed_unprocessed_pseudogene		12.1858	-0.462282	2.27058	-0.203597	0.838669	0.999962
ENSG00000221164	SNORA11F	snoRNA	small nucleolar RNA, H/ACA box 11F	3.85687	0.987922	3.23107	0.305757	0.75979	0.999962
ENSG00000082515	MRPL22	protein_coding	mitochondrial ribosomal protein L22	817.898	-0.00297426	0.249988	-0.0118976	0.990507	0.999962
ENSG00000214027	ARPC3P5	processed_pseudogene	actin related protein 2/3 complex subunit 3 pseudogene 5	6.26453	1.57716	1.98464	0.794683	0.426798	0.999962
ENSG00000219951	AL391416.1	processed_pseudogene		2.1103	-1.01658	1.77898	-0.571444	0.567699	0.999962
ENSG00000130287	NCAN	protein_coding	neurocan	2.15887	-1.19366	4.62106	-0.258309	0.796168	0.999962
ENSG00000232412	AL121601.1	lincRNA		0.661412	-13.1568	4.67466	-2.81449	0.00488545	0.0590873
ENSG00000279069	AC015813.5	TEC		182.586	0.190015	0.491631	0.386498	0.699128	0.999962
ENSG00000153208	MERTK	protein_coding	MER proto-oncogene, tyrosine kinase	175.604	-0.204784	0.70424	-0.290787	0.771214	0.999962
ENSG00000269444	AC011491.2	sense_overlapping		2.85018	-7.21088	3.95084	-1.82515	0.0679782	0.500361
ENSG00000228502	EEF1A1P11	processed_pseudogene	eukaryotic translation elongation factor 1 alpha 1 pseudogene 11	2172.3	0.32257	0.25745	1.25294	0.210226	0.911459
ENSG00000270015	AC087481.3	sense_intronic		44.6477	-0.426352	0.901349	-0.473016	0.636202	0.999962
ENSG00000259474	AC027228.1	antisense		0.392468	17.2664	4.64703	3.71558	0.000202737	0.00411345
ENSG00000135905	DOCK10	protein_coding	dedicator of cytokinesis 10	212.519	-0.296531	0.68844	-0.430729	0.666665	0.999962
ENSG00000117682	DHDDS	protein_coding	dehydrodolichyl diphosphate synthase subunit	6380.86	0.15062	0.170812	0.881783	0.377894	0.999059
ENSG00000267348	GEMIN7-AS1	antisense	GEMIN7 antisense RNA 1	49.547	0.679185	0.877403	0.774086	0.43888	0.999962
ENSG00000227719	AC006042.1	antisense		0.746157	-0.741794	4.63014	-0.16021	0.872716	0.999962
ENSG00000235802	HCFC1-AS1	antisense	HCFC1 antisense RNA 1	2.39788	-18.4324	4.60734	-4.00067	6.31645e-05	0.00221515
ENSG00000251477	AC114322.1	processed_pseudogene		0.433768	-4.74143	4.67466	-1.01428	0.310448	0.984023
ENSG00000174197	MGA	protein_coding	MGA, MAX dimerization protein	272.842	0.648388	0.64582	1.00398	0.31539	0.987175
ENSG00000282164	PEG13	sense_intronic	paternally expressed 13	206.994	-0.31159	0.412057	-0.756182	0.44954	0.999962
ENSG00000175643	RMI2	protein_coding	RecQ mediated genome instability 2	2798.54	-0.04884	0.180134	-0.271131	0.78629	0.999962
ENSG00000100626	GALNT16	protein_coding	polypeptide N-acetylgalactosaminyltransferase 16	11.439	-2.71506	2.50549	-1.08365	0.278522	0.963912
ENSG00000228797	FAM207BP	processed_pseudogene	family with sequence similarity 207 member B, pseudogene	268.556	0.46798	0.344101	1.36001	0.173827	0.840422
ENSG00000269968	AC006064.4	antisense		2.36626	0.709459	4.56343	0.155466	0.876454	0.999962
ENSG00000230426	ERVMER61-1	lincRNA	endogenous retrovirus group MER61 member 1	13.1172	0.843696	2.28178	0.369753	0.711566	0.999962
ENSG00000136631	VPS45	protein_coding	vacuolar protein sorting 45 homolog	593.817	-0.554925	0.346264	-1.60261	0.109022	0.668331
ENSG00000196338	NLGN3	protein_coding	neuroligin 3	73.6679	-0.368232	0.688931	-0.534498	0.592997	0.999962
ENSG00000066777	ARFGEF1	protein_coding	ADP ribosylation factor guanine nucleotide exchange factor 1	297.231	0.568066	0.671822	0.84556	0.397798	0.999962
ENSG00000251429	AC098679.2	transcribed_processed_pseudogene		10.7209	0.434998	0.849845	0.511856	0.608752	0.999962
ENSG00000230039	AL450487.1	processed_pseudogene		1.45264	-0.287372	4.5988	-0.0624884	0.950174	0.999962
ENSG00000186675	MAGEE2	protein_coding	MAGE family member E2	4.53423	6.57283	4.55178	1.44401	0.148735	0.779681
ENSG00000273184	AC010655.4	processed_transcript		35.3765	0.876613	1.46114	0.599952	0.548538	0.999962
ENSG00000184979	USP18	protein_coding	ubiquitin specific peptidase 18	392.993	-0.0368631	0.393544	-0.0936695	0.925372	0.999962
ENSG00000242571	RPL21P11	processed_pseudogene	ribosomal protein L21 pseudogene 11	7.80076	0.241703	0.820123	0.294716	0.768211	0.999962
ENSG00000272335	AC093297.2	lincRNA		22.7361	-0.215415	1.94415	-0.110802	0.911774	0.999962
ENSG00000283907	AD000090.1	antisense		10.2226	-1.35056	2.6621	-0.507329	0.611924	0.999962
ENSG00000267041	ZNF850	protein_coding	zinc finger protein 850	69.5419	-0.149568	1.30802	-0.114347	0.908963	0.999962
ENSG00000250180	AC074344.2	lincRNA		0.911766	-4.56674	4.67466	-0.976914	0.328612	0.989184
ENSG00000251535	AC079140.4	processed_pseudogene		4.01812	-4.02925	2.57917	-1.56223	0.118235	0.695675
ENSG00000227123	RPL12P44	processed_pseudogene	ribosomal protein L12 pseudogene 44	0.70247	-13.4757	4.67466	-2.88271	0.00394272	0.0486793
ENSG00000109062	SLC9A3R1	protein_coding	SLC9A3 regulator 1	6891.94	-0.214598	0.300725	-0.7136	0.475474	0.999962
ENSG00000266761	MIR3194	miRNA	microRNA 3194	1.95293	-1.27775	4.62131	-0.276491	0.782171	0.999962
ENSG00000231369	Z97353.1	processed_pseudogene		6.65841	-2.50884	3.77908	-0.663876	0.50677	0.999962
ENSG00000100625	SIX4	protein_coding	SIX homeobox 4	4.52982	1.73313	4.59286	0.377352	0.705912	0.999962
ENSG00000111530	CAND1	protein_coding	cullin associated and neddylation dissociated 1	2741.3	0.169857	0.447532	0.379541	0.704286	0.999962
ENSG00000120457	KCNJ5	protein_coding	potassium voltage-gated channel subfamily J member 5	8.36731	4.39341	3.15272	1.39353	0.16346	0.815124
ENSG00000231234	SKP1P1	transcribed_processed_pseudogene	S-phase kinase associated protein 1 pseudogene 1	38.3315	0.639362	0.698285	0.915617	0.359868	0.997195
ENSG00000187486	KCNJ11	protein_coding	potassium voltage-gated channel subfamily J member 11	102.77	0.943571	1.19153	0.791899	0.42842	0.999962
ENSG00000272989	LINC02012	lincRNA	long intergenic non-protein coding RNA 2012	59.993	0.46933	0.555945	0.844203	0.398556	0.999962
ENSG00000271978	AL359643.2	lincRNA		2.50895	0.740469	4.62333	0.160159	0.872756	0.999962
ENSG00000214176	PLEKHM1P1	transcribed_unprocessed_pseudogene	pleckstrin homology and RUN domain containing M1 pseudogene 1	811.784	-0.594821	0.33864	-1.7565	0.0790032	0.550093
ENSG00000100122	CRYBB1	protein_coding	crystallin beta B1	0.794299	15.3743	4.6325	3.31878	0.000904103	0.0129663
ENSG00000092529	CAPN3	protein_coding	calpain 3	18036.7	0.443252	0.19975	2.21903	0.0264845	0.254739
ENSG00000154975	CA10	protein_coding	carbonic anhydrase 10	3.83713	0.889069	4.61706	0.192562	0.847302	0.999962
ENSG00000056972	TRAF3IP2	protein_coding	TRAF3 interacting protein 2	4746.72	0.0358786	0.228076	0.15731	0.875	0.999962
ENSG00000280214	AC027682.7	TEC		8.37855	2.8704	3.95895	0.72504	0.468427	0.999962
ENSG00000275778	AC018630.2	protein_coding		29.2651	1.03785	0.837691	1.23894	0.215367	0.921092
ENSG00000142875	PRKACB	protein_coding	protein kinase cAMP-activated catalytic subunit beta	1174.92	0.311526	0.435574	0.715208	0.474481	0.999962
ENSG00000257509	AC073487.1	sense_intronic		4.24354	-0.892895	2.42463	-0.36826	0.712679	0.999962
ENSG00000075790	BCAP29	protein_coding	B cell receptor associated protein 29	500.751	-0.240612	0.420973	-0.571563	0.567618	0.999962
ENSG00000170927	PKHD1	protein_coding	PKHD1, fibrocystin/polyductin	5.91559	2.5643	3.55279	0.72177	0.470436	0.999962
ENSG00000203616	RHOT1P2	processed_pseudogene	ras homolog family member T1 pseudogene 2	6.56082	-0.537954	2.44557	-0.219971	0.825894	0.999962
ENSG00000140522	RLBP1	protein_coding	retinaldehyde binding protein 1	0.526021	16.2659	4.62563	3.51647	0.000437329	0.0068923
ENSG00000168172	HOOK3	protein_coding	hook microtubule tethering protein 3	494.478	-0.213989	0.294781	-0.725925	0.467885	0.999962
ENSG00000102096	PIM2	protein_coding	Pim-2 proto-oncogene, serine/threonine kinase	1870.07	-0.0085637	0.222552	-0.0384796	0.969305	0.999962
ENSG00000109606	DHX15	protein_coding	DEAH-box helicase 15	3515.71	-0.103387	0.387418	-0.266862	0.789575	0.999962
ENSG00000225928	CACYBPP1	processed_pseudogene	calcyclin binding protein pseudogene 1	0.46573	-0.832704	4.58215	-0.181728	0.855797	0.999962
ENSG00000120451	SNX19	protein_coding	sorting nexin 19	3954.3	-0.0591625	0.192164	-0.307875	0.758177	0.999962
ENSG00000262445	AC099684.2	antisense		3.54847	7.91679	4.56312	1.73495	0.0827491	0.567253
ENSG00000279897	BIRC6-AS2	transcribed_unprocessed_pseudogene	BIRC6 antisense RNA 2	3.08777	0.615127	4.58745	0.134089	0.893332	0.999962
ENSG00000215915	ATAD3C	protein_coding	ATPase family, AAA domain containing 3C	67.8536	0.0162456	1.78842	0.0090838	0.992752	0.999962
ENSG00000276291	FRG1HP	transcribed_unprocessed_pseudogene	FSHD region gene 1 family member H, pseudogene	97.3266	-0.761315	0.759236	-1.00274	0.315987	0.987175
ENSG00000117133	RPF1	protein_coding	ribosome production factor 1 homolog	1064.25	0.287011	0.377838	0.759614	0.447485	0.999962
ENSG00000085999	RAD54L	protein_coding	RAD54 like	1756.15	0.141975	0.33679	0.421554	0.67335	0.999962
ENSG00000269910	AL049840.2	antisense		207.828	-0.961911	0.444386	-2.16458	0.0304196	0.282228
ENSG00000165646	SLC18A2	protein_coding	solute carrier family 18 member A2	9.89449	-0.966267	3.32481	-0.290623	0.77134	0.999962
ENSG00000110172	CHORDC1	protein_coding	cysteine and histidine rich domain containing 1	342.596	-0.0140594	0.795749	-0.0176681	0.985904	0.999962
ENSG00000164889	SLC4A2	protein_coding	solute carrier family 4 member 2	138298	0.0204628	0.231766	0.0882906	0.929646	0.999962
ENSG00000258337	AC130895.1	sense_intronic		0.338986	-2.66802	4.61515	-0.578101	0.563196	0.999962
ENSG00000167384	ZNF180	protein_coding	zinc finger protein 180	64.3755	0.187694	1.25272	0.149829	0.880899	0.999962
ENSG00000113732	ATP6V0E1	protein_coding	ATPase H+ transporting V0 subunit e1	11940.3	0.0695552	0.215282	0.323089	0.746628	0.999962
ENSG00000278603	AC245033.3	unprocessed_pseudogene		39.5506	-0.327568	0.451584	-0.725376	0.468222	0.999962
ENSG00000269966	AL136164.2	lincRNA		0.350447	-17.383	4.62899	-3.75526	0.000173163	0.00371258
ENSG00000138152	BTBD16	protein_coding	BTB domain containing 16	0.40066	-5.33652	4.67466	-1.14158	0.253627	0.949576
ENSG00000243964	RPL23AP65	processed_pseudogene	ribosomal protein L23a pseudogene 65	14.8669	-0.536386	1.17079	-0.45814	0.646852	0.999962
ENSG00000102921	N4BP1	protein_coding	NEDD4 binding protein 1	1921.92	-0.323149	0.228284	-1.41555	0.156906	0.802464
ENSG00000100216	TOMM22	protein_coding	translocase of outer mitochondrial membrane 22	6352.42	-0.0547625	0.152203	-0.359799	0.718997	0.999962
ENSG00000143178	TBX19	protein_coding	T-box 19	48.4153	-1.67021	1.18491	-1.40956	0.158669	0.804238
ENSG00000126231	PROZ	protein_coding	protein Z, vitamin K dependent plasma glycoprotein	0.574635	-19.2863	4.64606	-4.15112	3.3085e-05	0.0016838
ENSG00000232573	RPL3P4	processed_pseudogene	ribosomal protein L3 pseudogene 4	3870.52	0.0268246	0.174455	0.153763	0.877797	0.999962
ENSG00000261431	AL023803.1	antisense		3.23792	-25.9294	4.65182	-5.57403	2.48916e-08	6.85122e-06
ENSG00000167178	ISLR2	protein_coding	immunoglobulin superfamily containing leucine rich repeat 2	5.26972	-16.8981	4.67466	-3.61483	0.000300547	0.00545247
ENSG00000155016	CYP2U1	protein_coding	cytochrome P450 family 2 subfamily U member 1	5585.47	-0.100742	0.249937	-0.403069	0.686898	0.999962
ENSG00000260092	AC009163.2	protein_coding		3.13152	1.06179	4.54181	0.23378	0.815156	0.999962
ENSG00000092054	MYH7	protein_coding	myosin heavy chain 7	24.836	-0.205455	0.730528	-0.281242	0.778525	0.999962
ENSG00000206989	SNORD63	snoRNA	small nucleolar RNA, C/D box 63	0.760082	-1.41496	4.61289	-0.30674	0.759042	0.999962
ENSG00000176752	OR51A1P	unprocessed_pseudogene	olfactory receptor family 51 subfamily A member 1 pseudogene	1.80138	-19.2803	4.64576	-4.15008	3.32366e-05	0.0016838
ENSG00000105865	DUS4L	protein_coding	dihydrouridine synthase 4 like	76.694	-0.491594	1.03588	-0.474567	0.635096	0.999962
ENSG00000151632	AKR1C2	protein_coding	aldo-keto reductase family 1 member C2	132.237	1.68232	0.905273	1.85836	0.0631179	0.47722
ENSG00000180089	TMEM86B	protein_coding	transmembrane protein 86B	355.175	0.965293	0.286986	3.36355	0.000769464	0.0112545
ENSG00000078295	ADCY2	protein_coding	adenylate cyclase 2	629.866	0.947064	0.410045	2.30966	0.0209072	0.209525
ENSG00000276488	AC008735.4	antisense		40.2777	-0.573042	0.877037	-0.653384	0.513509	0.999962
ENSG00000147509	RGS20	protein_coding	regulator of G protein signaling 20	1718.81	-0.127236	0.282392	-0.450563	0.652305	0.999962
ENSG00000272601	AC010655.3	transcribed_unprocessed_pseudogene		4.37427	2.60502	4.53045	0.575002	0.56529	0.999962
ENSG00000084623	EIF3I	protein_coding	eukaryotic translation initiation factor 3 subunit I	16913.9	-0.00126598	0.208684	-0.0060665	0.99516	0.999962
ENSG00000205018	AC092384.1	antisense		0.774952	-3.07149	4.67466	-0.65705	0.511149	0.999962
ENSG00000164104	HMGB2	protein_coding	high mobility group box 2	1889.66	0.239016	0.458048	0.521814	0.6018	0.999962
ENSG00000237685	AL139039.3	antisense		15.6855	-0.93878	1.82682	-0.513888	0.607331	0.999962
ENSG00000222011	FAM185A	protein_coding	family with sequence similarity 185 member A	147.122	0.0122324	0.309827	0.0394815	0.968507	0.999962
ENSG00000283503	LINC01902	lincRNA	long intergenic non-protein coding RNA 1902	0.893341	-4.48699	4.67466	-0.959853	0.337129	0.989184
ENSG00000177889	UBE2N	protein_coding	ubiquitin conjugating enzyme E2 N	4725.59	-0.205541	0.242597	-0.847253	0.396854	0.999962
ENSG00000267449	AC005884.2	antisense		0.696878	-0.781008	4.62772	-0.168767	0.86598	0.999962
ENSG00000154678	PDE1C	protein_coding	phosphodiesterase 1C	5.57846	-0.728672	3.71867	-0.19595	0.844649	0.999962
ENSG00000200530	SNORD35B	snoRNA	small nucleolar RNA, C/D box 35B	5.97939	0.0193272	1.44873	0.0133408	0.989356	0.999962
ENSG00000237595	AL161937.2	lincRNA		3.50165	-10.6757	4.67466	-2.28373	0.0223871	0.221408
ENSG00000165029	ABCA1	protein_coding	ATP binding cassette subfamily A member 1	311.557	-1.00347	0.528257	-1.89959	0.0574873	0.449877
ENSG00000232188	AL354714.3	lincRNA		0.586136	-4.46678	4.67466	-0.955531	0.339309	0.989184
ENSG00000159885	ZNF222	protein_coding	zinc finger protein 222	44.4508	-1.32179	1.48406	-0.890659	0.373112	0.998912
ENSG00000254577	AC087276.1	sense_overlapping		0.601472	-0.334834	4.62441	-0.0724057	0.942279	0.999962
ENSG00000239523	MYLK-AS1	antisense	MYLK antisense RNA 1	26.9774	0.943283	1.14346	0.824935	0.409408	0.999962
ENSG00000196290	NIF3L1	protein_coding	NGG1 interacting factor 3 like 1	799.986	-0.0148423	0.240829	-0.06163	0.950857	0.999962
ENSG00000148677	ANKRD1	protein_coding	ankyrin repeat domain 1	36.7061	6.5031	2.21985	2.92952	0.00339482	0.0423949
ENSG00000153898	MCOLN2	protein_coding	mucolipin 2	94.1411	-0.716141	1.37591	-0.520487	0.602725	0.999962
ENSG00000146085	MUT	protein_coding	methylmalonyl-CoA mutase	771.808	0.193396	0.461899	0.418698	0.675437	0.999962
ENSG00000009844	VTA1	protein_coding	vesicle trafficking 1	1387.62	0.0243507	0.371521	0.0655432	0.947742	0.999962
ENSG00000225357	RPF2P1	processed_pseudogene	ribosome production factor 2 homolog pseudogene 1	9.81443	2.42114	1.02362	2.36527	0.0180168	0.184425
ENSG00000050820	BCAR1	protein_coding	BCAR1, Cas family scaffolding protein	24983.7	0.0477368	0.160155	0.298067	0.765652	0.999962
ENSG00000159263	SIM2	protein_coding	single-minded family bHLH transcription factor 2	6.53375	-7.02085	3.14918	-2.22942	0.0257857	0.249338
ENSG00000248810	LINC02432	lincRNA	long intergenic non-protein coding RNA 2432	0.358426	0.060037	4.62867	0.0129707	0.989651	0.999962
ENSG00000279361	AC079331.1	TEC		1.20015	-22.4701	4.65141	-4.83081	1.35981e-06	0.000160967
ENSG00000275832	ARHGAP23	protein_coding	Rho GTPase activating protein 23	2762.56	-0.283286	0.259851	-1.09019	0.275631	0.963912
ENSG00000005421	PON1	protein_coding	paraoxonase 1	1.11294	-5.15016	4.67466	-1.10172	0.270584	0.963912
ENSG00000121766	ZCCHC17	protein_coding	zinc finger CCHC-type containing 17	1220.4	-0.11288	0.274146	-0.41175	0.680523	0.999962
ENSG00000125746	EML2	protein_coding	echinoderm microtubule associated protein like 2	13742.9	-0.00504086	0.240616	-0.0209498	0.983286	0.999962
ENSG00000180846	CSNK1G2-AS1	antisense	CSNK1G2 antisense RNA 1	4.09741	-0.923151	4.57767	-0.201664	0.840179	0.999962
ENSG00000048342	CC2D2A	protein_coding	coiled-coil and C2 domain containing 2A	1266.33	-0.0608388	0.270508	-0.224906	0.822053	0.999962
ENSG00000178623	GPR35	protein_coding	G protein-coupled receptor 35	8.01634	4.04892	2.25273	1.79734	0.0722814	0.522134
ENSG00000116690	PRG4	protein_coding	proteoglycan 4	95.908	1.18365	1.82252	0.649456	0.516044	0.999962
ENSG00000257489	AC010203.1	transcribed_unprocessed_pseudogene		0.420985	16.6119	4.64628	3.57531	0.000349817	0.00598253
ENSG00000081853	PCDHGA2	protein_coding	protocadherin gamma subfamily A, 2	132.268	0.078435	0.643264	0.121933	0.902952	0.999962
ENSG00000170468	RIOX1	protein_coding	ribosomal oxygenase 1	3749.4	0.0669205	0.142624	0.469209	0.63892	0.999962
ENSG00000104804	TULP2	protein_coding	tubby like protein 2	12.7671	-0.312571	1.957	-0.159719	0.873102	0.999962
ENSG00000226432	AC010342.1	processed_pseudogene		11.4958	0.903845	1.11559	0.810194	0.417828	0.999962
ENSG00000140854	KATNB1	protein_coding	katanin regulatory subunit B1	17769.3	0.130371	0.210368	0.619728	0.535437	0.999962
ENSG00000212719	C17orf51	protein_coding	chromosome 17 open reading frame 51	1985.92	-0.539977	0.284934	-1.8951	0.0580797	0.452451
ENSG00000170959	DCDC1	protein_coding	doublecortin domain containing 1	6.91538	6.07855	4.38465	1.38632	0.165648	0.820382
ENSG00000281490	CICP14	processed_pseudogene	capicua transcriptional repressor pseudogene 14	329.557	-0.44437	0.420845	-1.0559	0.291014	0.965877
ENSG00000272921	AC005832.4	protein_coding		12.0403	1.29058	2.02045	0.638761	0.522978	0.999962
ENSG00000198105	ZNF248	protein_coding	zinc finger protein 248	87.8184	0.0152665	0.741914	0.0205772	0.983583	0.999962
ENSG00000109339	MAPK10	protein_coding	mitogen-activated protein kinase 10	49.1413	4.35376	1.34685	3.23255	0.00122692	0.017085
ENSG00000095794	CREM	protein_coding	cAMP responsive element modulator	659.799	0.049825	0.27402	0.18183	0.855716	0.999962
ENSG00000206997	RNU6-524P	snRNA	RNA, U6 small nuclear 524, pseudogene	0.478138	-4.40231	4.67466	-0.941738	0.346327	0.989184
ENSG00000243053	RPL31P58	processed_pseudogene	ribosomal protein L31 pseudogene 58	1.11361	1.06088	4.62762	0.229249	0.818675	0.999962
ENSG00000023041	ZDHHC6	protein_coding	zinc finger DHHC-type containing 6	1423.4	0.0811192	0.319638	0.253785	0.799662	0.999962
ENSG00000284830	AL049557.1	bidirectional_promoter_lncRNA		3.79044	0.882878	3.15245	0.280061	0.779431	0.999962
ENSG00000184271	POU6F1	protein_coding	POU class 6 homeobox 1	798.802	-0.266214	0.262342	-1.01476	0.310221	0.984023
ENSG00000249141	AL159163.1	protein_coding		0.586136	-4.46678	4.67466	-0.955531	0.339309	0.989184
ENSG00000173546	CSPG4	protein_coding	chondroitin sulfate proteoglycan 4	86446.9	0.278878	0.233884	1.19238	0.233113	0.94189
ENSG00000178372	CALML5	protein_coding	calmodulin like 5	0.268278	16.4884	4.64682	3.54832	0.000387696	0.00626219
ENSG00000231699	AC020550.1	processed_pseudogene		0.200833	-5.61752	4.67466	-1.2017	0.229481	0.938769
ENSG00000147439	BIN3	protein_coding	bridging integrator 3	7717.35	-0.10846	0.218879	-0.495525	0.620229	0.999962
ENSG00000176383	B3GNT4	protein_coding	UDP-GlcNAc:betaGal beta-1,3-N-acetylglucosaminyltransferase 4	25.0815	1.97113	1.16642	1.68989	0.0910481	0.601447
ENSG00000123560	PLP1	protein_coding	proteolipid protein 1	2778.88	-0.539574	0.325297	-1.65871	0.0971742	0.625242
ENSG00000275223	AL121906.2	lincRNA		27.1006	-1.43519	1.3137	-1.09248	0.274621	0.963912
ENSG00000125744	RTN2	protein_coding	reticulon 2	13926.7	-0.235302	0.249748	-0.942158	0.346112	0.989184
ENSG00000250234	AC025754.1	antisense		6.48827	-6.10037	3.54645	-1.72013	0.0854082	0.577835
ENSG00000100652	SLC10A1	protein_coding	solute carrier family 10 member 1	1.48337	-3.54973	4.59007	-0.773349	0.439316	0.999962
ENSG00000259660	DNM1P47	transcribed_unprocessed_pseudogene	dynamin 1 pseudogene 47	8.77373	-5.39584	2.51726	-2.14354	0.03207	0.294036
ENSG00000157315	TMED6	protein_coding	transmembrane p24 trafficking protein 6	29.8333	1.46651	1.49028	0.984047	0.325092	0.989184
ENSG00000015532	XYLT2	protein_coding	xylosyltransferase 2	10515.7	-0.102084	0.204207	-0.499904	0.617142	0.999962
ENSG00000165732	DDX21	protein_coding	DExD-box helicase 21	513.91	-0.261762	0.760879	-0.344026	0.730827	0.999962
ENSG00000185437	SH3BGR	protein_coding	SH3 domain binding glutamate rich protein	43.995	-0.40508	0.83289	-0.486355	0.626716	0.999962
ENSG00000168268	NT5DC2	protein_coding	5'-nucleotidase domain containing 2	29144.2	0.117488	0.222837	0.527235	0.59803	0.999962
ENSG00000152240	HAUS1	protein_coding	HAUS augmin like complex subunit 1	324.383	0.186636	0.664613	0.280819	0.778849	0.999962
ENSG00000225513	AL158824.1	processed_pseudogene		0.546443	-3.83654	4.67466	-0.820709	0.411812	0.999962
ENSG00000154642	C21orf91	protein_coding	chromosome 21 open reading frame 91	1222.73	-0.718673	0.705071	-1.01929	0.308064	0.982268
ENSG00000127530	OR7C1	protein_coding	olfactory receptor family 7 subfamily C member 1	705.766	0.378835	0.434366	0.872156	0.383123	0.999911
ENSG00000183298	RPSAP19	processed_pseudogene	ribosomal protein SA pseudogene 19	852.05	0.0830833	0.210946	0.39386	0.693684	0.999962
ENSG00000143319	ISG20L2	protein_coding	interferon stimulated exonuclease gene 20 like 2	3468.25	0.0757156	0.267984	0.282538	0.777531	0.999962
ENSG00000275634	RF02160	misc_RNA		7.62084	1.41558	1.47045	0.962683	0.335707	0.989184
ENSG00000166140	ZFYVE19	protein_coding	zinc finger FYVE-type containing 19	5115.71	0.161969	0.197577	0.819777	0.412343	0.999962
ENSG00000140905	GCSH	protein_coding	glycine cleavage system protein H	655.254	-0.0224735	0.32554	-0.0690345	0.944962	0.999962
ENSG00000268750	AC010522.1	protein_coding		20.1535	2.18571	2.38739	0.915523	0.359917	0.997195
ENSG00000264595	AC103808.2	lincRNA		3.07433	-8.54502	4.67466	-1.82794	0.067558	0.498076
ENSG00000165730	STOX1	protein_coding	storkhead box 1	4.61521	1.5547	2.41484	0.643814	0.519696	0.999962
ENSG00000175745	NR2F1	protein_coding	nuclear receptor subfamily 2 group F member 1	229.471	-0.139598	0.601086	-0.232243	0.816349	0.999962
ENSG00000186017	ZNF566	protein_coding	zinc finger protein 566	95.1837	-0.13199	0.672008	-0.196411	0.844289	0.999962
ENSG00000283633	AP000547.3	lincRNA		1.49807	4.48344	4.57634	0.979699	0.327235	0.989184
ENSG00000221852	KRTAP1-5	protein_coding	keratin associated protein 1-5	0.741287	18.0379	4.64664	3.88192	0.000103633	0.00260909
ENSG00000123562	MORF4L2	protein_coding	mortality factor 4 like 2	5873	0.115751	0.221088	0.523551	0.600591	0.999962
ENSG00000139977	NAA30	protein_coding	N(alpha)-acetyltransferase 30, NatC catalytic subunit	1324.79	-0.315665	0.344607	-0.916015	0.359659	0.997195
ENSG00000272420	AL513477.2	sense_intronic		2.7309	2.26007	3.74226	0.603932	0.545889	0.999962
ENSG00000073756	PTGS2	protein_coding	prostaglandin-endoperoxide synthase 2	223.527	0.40239	0.584977	0.687873	0.491533	0.999962
ENSG00000230747	AC021188.1	antisense		14.5697	-1.51464	1.51169	-1.00195	0.316367	0.987474
ENSG00000245910	SNHG6	processed_transcript	small nucleolar RNA host gene 6	1953.81	-0.669498	0.185596	-3.60728	0.000309428	0.00553207
ENSG00000256167	ATF4P4	transcribed_processed_pseudogene	activating transcription factor 4 pseudogene 4	6.76749	0.0238132	1.5119	0.0157505	0.987433	0.999962
ENSG00000187147	RNF220	protein_coding	ring finger protein 220	6244.19	0.0519026	0.187695	0.276527	0.782143	0.999962
ENSG00000159082	SYNJ1	protein_coding	synaptojanin 1	469.374	-0.104721	0.759594	-0.137865	0.890347	0.999962
ENSG00000278416	PMS2P2	unprocessed_pseudogene	PMS1 homolog 2, mismatch repair system component pseudogene 2	38.4381	-0.491568	0.740428	-0.663898	0.506756	0.999962
ENSG00000159202	UBE2Z	protein_coding	ubiquitin conjugating enzyme E2 Z	5805.29	-0.116101	0.221182	-0.524911	0.599645	0.999962
ENSG00000277349	AC133919.3	unprocessed_pseudogene		1.06224	-1.07345	2.9764	-0.360653	0.718359	0.999962
ENSG00000137955	RABGGTB	protein_coding	Rab geranylgeranyltransferase beta subunit	1951.32	0.0692513	0.236347	0.293007	0.769517	0.999962
ENSG00000136861	CDK5RAP2	protein_coding	CDK5 regulatory subunit associated protein 2	764.304	-0.301445	0.362373	-0.831863	0.405486	0.999962
ENSG00000267598	AC011446.2	antisense		1.75114	0.0180183	4.67466	0.00385445	0.996925	0.999962
ENSG00000254388	DUTP2	processed_pseudogene	deoxyuridine triphosphatase pseudogene 2	0.550624	-0.313703	4.62819	-0.0677808	0.94596	0.999962
ENSG00000268568	AC007228.2	lincRNA		42.3471	-0.0917351	0.756103	-0.121326	0.903433	0.999962
ENSG00000277941	RF01875	misc_RNA		0.939849	-18.5383	4.64639	-3.98983	6.61207e-05	0.00225786
ENSG00000131849	ZNF132	protein_coding	zinc finger protein 132	129.558	-0.520862	0.55898	-0.931808	0.351436	0.994076
ENSG00000120937	NPPB	protein_coding	natriuretic peptide B	2.28104	0.0179958	4.67466	0.00384964	0.996928	0.999962
ENSG00000215190	LINC00680	transcribed_unprocessed_pseudogene	long intergenic non-protein coding RNA 680	181.299	-0.717186	0.497516	-1.44153	0.149434	0.781262
ENSG00000278517	MIR6865	miRNA	microRNA 6865	1.11019	-1.48207	3.42849	-0.432281	0.665537	0.999962
ENSG00000261824	LINC00662	lincRNA	long intergenic non-protein coding RNA 662	268.3	0.447945	0.277891	1.61194	0.106974	0.661884
ENSG00000225920	RIMKLBP2	processed_pseudogene	ribosomal modification protein rimK like family member B pseudogene 2	2.30871	0.479294	3.71264	0.129098	0.89728	0.999962
ENSG00000003147	ICA1	protein_coding	islet cell autoantigen 1	262.099	0.389014	0.440135	0.883852	0.376776	0.999059
ENSG00000154025	SLC5A10	protein_coding	solute carrier family 5 member 10	3271.23	-0.067086	0.227088	-0.295418	0.767675	0.999962
ENSG00000283360	AL592295.3	lincRNA		0.694173	0.0180141	4.67466	0.00385357	0.996925	0.999962
ENSG00000178464	RPL10P16	processed_pseudogene	ribosomal protein L10 pseudogene 16	10874.1	-0.0113889	0.163614	-0.0696085	0.944505	0.999962
ENSG00000021762	OSBPL5	protein_coding	oxysterol binding protein like 5	8937.12	-0.0927869	0.206089	-0.450227	0.652547	0.999962
ENSG00000218305	CDC14C	processed_pseudogene	cell division cycle 14C	19.2649	0.506672	1.68671	0.300391	0.763879	0.999962
ENSG00000072518	MARK2	protein_coding	microtubule affinity regulating kinase 2	5135.18	-0.190435	0.206343	-0.922906	0.356056	0.996495
ENSG00000248714	AC091180.2	lincRNA		10.1202	0.45485	2.56196	0.17754	0.859084	0.999962
ENSG00000160867	FGFR4	protein_coding	fibroblast growth factor receptor 4	1006.24	0.825182	0.267918	3.07998	0.00207013	0.027277
ENSG00000255176	AP000941.1	antisense		10.0123	-0.33284	2.71864	-0.122429	0.90256	0.999962
ENSG00000121060	TRIM25	protein_coding	tripartite motif containing 25	8193.26	-0.175743	0.172427	-1.01923	0.308095	0.982268
ENSG00000254676	AP000873.4	sense_overlapping		4.73697	0.938367	2.20309	0.425933	0.670157	0.999962
ENSG00000134987	WDR36	protein_coding	WD repeat domain 36	370.254	-0.247468	0.548103	-0.451499	0.65163	0.999962
ENSG00000280269	AP000577.1	TEC		0.968641	-3.50339	4.5945	-0.762518	0.445751	0.999962
ENSG00000258837	AL133370.1	antisense		0.356383	-17.7419	4.64777	-3.81729	0.000134926	0.00308951
ENSG00000172197	MBOAT1	protein_coding	membrane bound O-acyltransferase domain containing 1	776.664	-0.448003	0.243146	-1.84253	0.0653983	0.488899
ENSG00000166828	SCNN1G	protein_coding	sodium channel epithelial 1 gamma subunit	0.530572	-17.7843	4.62548	-3.84486	0.000120619	0.0029035
ENSG00000130545	CRB3	protein_coding	crumbs 3, cell polarity complex component	44.0311	-1.70905	1.63112	-1.04778	0.294741	0.969746
ENSG00000235280	MCF2L-AS1	antisense	MCF2L antisense RNA 1	3.01056	-0.0932231	4.57257	-0.0203875	0.983734	0.999962
ENSG00000132953	XPO4	protein_coding	exportin 4	677.722	0.00528419	0.813975	0.00649184	0.99482	0.999962
ENSG00000112697	TMEM30A	protein_coding	transmembrane protein 30A	3489.21	0.345099	0.425639	0.810778	0.417493	0.999962
ENSG00000273249	BX649632.1	antisense		7.52147	14.1359	4.62903	3.05374	0.00226006	0.0294662
ENSG00000284341	AL807752.7	protein_coding		11.0499	5.88645	4.55242	1.29304	0.195998	0.882398
ENSG00000134463	ECHDC3	protein_coding	enoyl-CoA hydratase domain containing 3	1213.95	0.427415	0.259315	1.64825	0.0993014	0.633247
ENSG00000250899	AC125807.2	lincRNA		661.837	0.0387897	0.302066	0.128415	0.897821	0.999962
ENSG00000214485	RPL7P1	processed_pseudogene	ribosomal protein L7 pseudogene 1	1244.71	-0.399536	0.270091	-1.47926	0.13907	0.75594
ENSG00000222051	RNU6-1165P	snRNA	RNA, U6 small nuclear 1165, pseudogene	0.30393	0.0180231	4.67466	0.00385549	0.996924	0.999962
ENSG00000138658	ZGRF1	protein_coding	zinc finger GRF-type containing 1	30.8639	-1.54118	1.39342	-1.10604	0.268711	0.962673
ENSG00000185753	CXorf38	protein_coding	chromosome X open reading frame 38	667.937	0.191644	0.323979	0.591533	0.554163	0.999962
ENSG00000249816	LINC00964	lincRNA	long intergenic non-protein coding RNA 964	1.13267	-0.861221	4.63019	-0.186001	0.852444	0.999962
ENSG00000274642	AC244669.2	unprocessed_pseudogene		8.75954	0.135087	2.31295	0.0584049	0.953426	0.999962
ENSG00000189376	C8orf76	protein_coding	chromosome 8 open reading frame 76	312.152	-0.0356238	0.374654	-0.0950845	0.924248	0.999962
ENSG00000204580	DDR1	protein_coding	discoidin domain receptor tyrosine kinase 1	3424.14	-0.0411927	0.301977	-0.13641	0.891497	0.999962
ENSG00000134817	APLNR	protein_coding	apelin receptor	6.39235	-1.01829	4.47977	-0.227308	0.820184	0.999962
ENSG00000100918	REC8	protein_coding	REC8 meiotic recombination protein	3281.96	0.135012	0.275083	0.490804	0.623565	0.999962
ENSG00000248724	NPHP3-AS1	antisense	NPHP3 antisense RNA 1	14.0396	-1.32832	1.30461	-1.01818	0.308594	0.982803
ENSG00000113361	CDH6	protein_coding	cadherin 6	56.9924	1.47044	1.54244	0.953321	0.340427	0.989184
ENSG00000066336	SPI1	protein_coding	Spi-1 proto-oncogene	22.3403	-1.17588	1.55311	-0.75711	0.448984	0.999962
ENSG00000262662	AC127496.4	antisense		1.63933	-4.35297	4.59732	-0.94685	0.343715	0.989184
ENSG00000182405	PGBD4	protein_coding	piggyBac transposable element derived 4	74.8979	-0.775377	1.04948	-0.73882	0.460016	0.999962
ENSG00000019582	CD74	protein_coding	CD74 molecule	1103.26	1.2884	0.685973	1.87821	0.0603531	0.464041
ENSG00000188229	TUBB4B	protein_coding	tubulin beta 4B class IVb	104934	0.0412669	0.243918	0.169184	0.865652	0.999962
ENSG00000219395	HSPA8P15	processed_pseudogene	heat shock protein family A (Hsp70) member 8 pseudogene 15	1.11447	-0.817767	4.62142	-0.176951	0.859547	0.999962
ENSG00000197782	ZNF780A	protein_coding	zinc finger protein 780A	122.321	-0.0572557	0.434572	-0.131752	0.895181	0.999962
ENSG00000266184	AC018371.2	processed_pseudogene		1.99315	2.71316	3.27356	0.828809	0.407213	0.999962
ENSG00000236740	AL033384.1	lincRNA		0.40066	-5.33652	4.67466	-1.14158	0.253627	0.949576
ENSG00000186951	PPARA	protein_coding	peroxisome proliferator activated receptor alpha	967.281	-0.555387	0.59303	-0.936523	0.349004	0.992885
ENSG00000090020	SLC9A1	protein_coding	solute carrier family 9 member A1	15809.8	0.115076	0.265281	0.433789	0.664442	0.999962
ENSG00000204947	ZNF425	protein_coding	zinc finger protein 425	183.176	-1.64857	0.65922	-2.50079	0.0123918	0.134971
ENSG00000269713	NBPF9	protein_coding	NBPF member 9	556.258	0.196905	0.424414	0.463946	0.642686	0.999962
ENSG00000199961	SNORD1B	snoRNA	small nucleolar RNA, C/D box 1B	3.39289	-2.09177	2.06944	-1.01079	0.312118	0.985715
ENSG00000170100	ZNF778	protein_coding	zinc finger protein 778	246.761	0.428294	0.608141	0.704268	0.481266	0.999962
ENSG00000249337	SNX18P25	processed_pseudogene	sorting nexin 18 pseudogene 25	0.715341	-4.72134	4.67466	-1.00998	0.312503	0.985715
ENSG00000121064	SCPEP1	protein_coding	serine carboxypeptidase 1	6475.98	0.0848892	0.144798	0.58626	0.557701	0.999962
ENSG00000243660	ZNF487	protein_coding	zinc finger protein 487	41.474	0.808298	1.01186	0.798826	0.424391	0.999962
ENSG00000229728	AL136531.1	antisense		1.11298	-1.85417	4.59451	-0.403562	0.686535	0.999962
ENSG00000145321	GC	protein_coding	GC, vitamin D binding protein	650.698	1.20677	1.5758	0.76581	0.443789	0.999962
ENSG00000205707	ETFRF1	protein_coding	electron transfer flavoprotein regulatory factor 1	225.144	-0.108419	0.520041	-0.208482	0.834853	0.999962
ENSG00000179097	HTR1F	protein_coding	5-hydroxytryptamine receptor 1F	7.11334	5.01161	3.14382	1.59411	0.11091	0.673355
ENSG00000143756	FBXO28	protein_coding	F-box protein 28	986.732	-0.266602	0.615633	-0.433054	0.664976	0.999962
ENSG00000167004	PDIA3	protein_coding	protein disulfide isomerase family A member 3	15942.5	-0.0106206	0.237189	-0.0447769	0.964285	0.999962
ENSG00000124120	TTPAL	protein_coding	alpha tocopherol transfer protein like	1258.01	-0.147853	0.325184	-0.454675	0.649343	0.999962
ENSG00000185291	IL3RA	protein_coding	interleukin 3 receptor subunit alpha	17.9327	-1.03686	1.56472	-0.662647	0.507556	0.999962
ENSG00000189195	BTBD8	protein_coding	BTB domain containing 8	26.4598	-1.65966	1.58773	-1.0453	0.295884	0.970342
ENSG00000124107	SLPI	protein_coding	secretory leukocyte peptidase inhibitor	70.1599	-0.198776	2.50731	-0.0792788	0.936811	0.999962
ENSG00000248126	AC091849.1	unprocessed_pseudogene		8.30161	-0.789555	1.13389	-0.696321	0.486228	0.999962
ENSG00000237232	ZNF295-AS1	lincRNA	ZNF295 antisense RNA 1	194.715	0.156759	0.814994	0.192344	0.847473	0.999962
ENSG00000259367	AC087286.2	antisense		2.689	-2.88344	4.23253	-0.681257	0.495709	0.999962
ENSG00000142856	ITGB3BP	protein_coding	integrin subunit beta 3 binding protein	140.171	0.223775	0.512427	0.436697	0.662331	0.999962
ENSG00000240477	AC022494.1	processed_pseudogene		0.89425	0.301727	4.62132	0.0652903	0.947943	0.999962
ENSG00000198113	TOR4A	protein_coding	torsin family 4 member A	15927.3	-0.0126783	0.181156	-0.0699852	0.944205	0.999962
ENSG00000125686	MED1	protein_coding	mediator complex subunit 1	1191.61	-0.359543	0.306893	-1.17156	0.241374	0.949576
ENSG00000147571	CRH	protein_coding	corticotropin releasing hormone	58.2238	-0.97594	2.71024	-0.360094	0.718777	0.999962
ENSG00000161594	KLHL10	protein_coding	kelch like family member 10	0.667767	-4.55765	4.67466	-0.974969	0.329576	0.989184
ENSG00000271550	BNIP3P11	processed_pseudogene	BCL2 interacting protein 3 pseudogene 11	4.89261	4.92053	3.9867	1.23423	0.217116	0.923476
ENSG00000157150	TIMP4	protein_coding	TIMP metallopeptidase inhibitor 4	191.699	0.902133	0.348533	2.58837	0.00964304	0.108715
ENSG00000244462	RBM12	protein_coding	RNA binding motif protein 12	1191.69	0.64135	0.478117	1.34141	0.179787	0.853217
ENSG00000150593	PDCD4	protein_coding	programmed cell death 4	910.144	0.381803	0.435483	0.876735	0.380631	0.999911
ENSG00000281181	FP236383.3	lincRNA		422089	-0.160911	0.309668	-0.519622	0.603327	0.999962
ENSG00000184898	RBM43	protein_coding	RNA binding motif protein 43	196.882	0.486616	0.756542	0.643211	0.520087	0.999962
ENSG00000245857	AF233439.1	lincRNA		1.18791	0.0180061	4.67466	0.00385185	0.996927	0.999962
ENSG00000100271	TTLL1	protein_coding	tubulin tyrosine ligase like 1	1284.61	0.190117	0.247916	0.766862	0.443164	0.999962
ENSG00000188710	QRFP	protein_coding	pyroglutamylated RFamide peptide	17.6634	1.01797	1.54783	0.657674	0.510748	0.999962
ENSG00000153922	CHD1	protein_coding	chromodomain helicase DNA binding protein 1	106.86	0.595768	0.845246	0.704846	0.480906	0.999962
ENSG00000275601	AC011330.2	sense_intronic		7.08416	0.994394	1.7168	0.579214	0.562445	0.999962
ENSG00000232952	AL512844.1	processed_pseudogene		15.4875	-2.01091	1.71632	-1.17164	0.24134	0.949576
ENSG00000141639	MAPK4	protein_coding	mitogen-activated protein kinase 4	21.1604	-4.17383	2.99822	-1.39211	0.163891	0.815979
ENSG00000161996	WDR90	protein_coding	WD repeat domain 90	4845.85	0.146158	0.205865	0.70997	0.477723	0.999962
ENSG00000144460	NYAP2	protein_coding	neuronal tyrosine-phosphorylated phosphoinositide-3-kinase adaptor 2	2.57407	15.0302	4.64863	3.23325	0.00122389	0.0170588
ENSG00000272948	AP001412.1	antisense		15.9618	-1.81171	1.43952	-1.25855	0.208192	0.907975
ENSG00000274292	AC084018.2	lincRNA		59.42	-1.61631	1.02452	-1.57763	0.114652	0.684316
ENSG00000224114	AL591846.1	processed_pseudogene		852.559	1.14267	0.636514	1.79521	0.0726208	0.523264
ENSG00000115592	PRKAG3	protein_coding	protein kinase AMP-activated non-catalytic subunit gamma 3	1.69004	16.2537	4.62061	3.51766	0.000435368	0.00686537
ENSG00000273069	AC211433.2	lincRNA		0.86332	4.80294	4.58522	1.04748	0.294877	0.969876
ENSG00000235256	FKBP4P7	processed_pseudogene	FK506 binding protein 4 pseudogene 7	3.35475	-2.27634	3.23662	-0.703307	0.481864	0.999962
ENSG00000198301	SDAD1	protein_coding	SDA1 domain containing 1	213.705	-0.316426	0.959295	-0.329853	0.741511	0.999962
ENSG00000131910	NR0B2	protein_coding	nuclear receptor subfamily 0 group B member 2	17.2051	2.3573	2.47324	0.953119	0.34053	0.989184
ENSG00000259379	MTND5P32	processed_pseudogene	mitochondrially encoded NADH:ubiquinone oxidoreductase core subunit 5 pseudogene 32	0.475766	16.5826	4.64712	3.56835	0.000359233	0.00604617
ENSG00000187013	C17orf82	lincRNA	chromosome 17 open reading frame 82	516.835	-0.110503	0.320465	-0.344821	0.730229	0.999962
ENSG00000279390	AF127577.6	TEC		1.32757	-20.4307	4.64741	-4.39616	1.10184e-05	0.000822949
ENSG00000184414	IRS3P	processed_pseudogene	insulin receptor substrate 3, pseudogene	17.9258	2.49613	1.35834	1.83763	0.0661167	0.491914
ENSG00000064932	SBNO2	protein_coding	strawberry notch homolog 2	26863.8	0.0185566	0.171343	0.108301	0.913757	0.999962
ENSG00000104870	FCGRT	protein_coding	Fc fragment of IgG receptor and transporter	18639.1	0.456142	0.261029	1.74748	0.0805549	0.558251
ENSG00000249115	HAUS5	protein_coding	HAUS augmin like complex subunit 5	3803.29	0.0302002	0.196229	0.153902	0.877687	0.999962
ENSG00000136367	ZFHX2	protein_coding	zinc finger homeobox 2	37.1874	-1.51106	1.63204	-0.925875	0.354511	0.995473
ENSG00000232187	FTH1P7	processed_pseudogene	ferritin heavy chain 1 pseudogene 7	3786.09	0.115495	0.199934	0.577665	0.56349	0.999962
ENSG00000204659	CBY3	protein_coding	chibby family member 3	0.976602	-4.32326	4.57845	-0.944263	0.345035	0.989184
ENSG00000233452	STXBP5-AS1	antisense	STXBP5 antisense RNA 1	56.6711	-0.792538	0.631123	-1.25576	0.209204	0.90991
ENSG00000173545	ZNF622	protein_coding	zinc finger protein 622	3151.61	-0.052687	0.208703	-0.25245	0.800694	0.999962
ENSG00000162601	MYSM1	protein_coding	Myb like, SWIRM and MPN domains 1	210.89	-1.05411	0.552715	-1.90715	0.0565006	0.444453
ENSG00000163380	LMOD3	protein_coding	leiomodin 3	2.0069	-22.0451	4.61951	-4.77217	1.8225e-06	0.00020353
ENSG00000138772	ANXA3	protein_coding	annexin A3	78.3462	1.55164	1.41315	1.098	0.272203	0.963912
ENSG00000254595	AC084337.1	processed_pseudogene		7.77161	-1.66762	2.73708	-0.609269	0.542346	0.999962
ENSG00000214300	SPDYE3	protein_coding	speedy/RINGO cell cycle regulator family member E3	185.524	0.0746385	0.357667	0.208682	0.834697	0.999962
ENSG00000269946	AL158152.2	lincRNA		5.24385	-3.62966	2.59956	-1.39626	0.162637	0.814221
ENSG00000186567	CEACAM19	protein_coding	carcinoembryonic antigen related cell adhesion molecule 19	12.9934	2.96189	1.15472	2.56503	0.0103166	0.115354
ENSG00000267751	AC009005.1	antisense		49.0066	-0.249928	1.18764	-0.210441	0.833323	0.999962
ENSG00000184220	CMSS1	protein_coding	cms1 ribosomal small subunit homolog (yeast)	268.965	0.0988853	0.664259	0.148866	0.88166	0.999962
ENSG00000236217	C1DP2	processed_pseudogene	C1D nuclear receptor corepressor pseudogene 2	3.72429	-5.44291	4.58778	-1.18639	0.235467	0.944404
ENSG00000055070	SZRD1	protein_coding	SUZ RNA binding domain containing 1	37584.4	0.715503	0.469789	1.52303	0.127751	0.724474
ENSG00000087495	PHACTR3	protein_coding	phosphatase and actin regulator 3	17.682	-1.09647	2.04624	-0.535846	0.592065	0.999962
ENSG00000260490	MYL12BP1	processed_pseudogene	myosin light chain 12B pseudogene 1	15.3135	-2.16565	1.42358	-1.52127	0.128193	0.725353
ENSG00000121957	GPSM2	protein_coding	G protein signaling modulator 2	911.05	0.329855	0.469689	0.702284	0.482502	0.999962
ENSG00000169246	NPIPB3	protein_coding	nuclear pore complex interacting protein family member B3	151.797	0.0318118	0.6898	0.0461175	0.963217	0.999962
ENSG00000140521	POLG	protein_coding	DNA polymerase gamma, catalytic subunit	11294.2	-0.0615679	0.205894	-0.299027	0.764919	0.999962
ENSG00000218052	ADAMTS7P4	transcribed_unprocessed_pseudogene	ADAMTS7 pseudogene 4	3.59798	-4.10038	4.54568	-0.90204	0.367036	0.997681
ENSG00000140443	IGF1R	protein_coding	insulin like growth factor 1 receptor	3408.79	-0.582929	0.269247	-2.16503	0.0303853	0.282006
ENSG00000279207	AC015813.6	TEC		114.721	0.234349	0.784492	0.298727	0.765148	0.999962
ENSG00000267024	AC008747.1	antisense		0.390837	-4.46786	4.67466	-0.95576	0.339193	0.989184
ENSG00000155926	SLA	protein_coding	Src like adaptor	3.76526	1.03736	4.56879	0.227053	0.820383	0.999962
ENSG00000104872	PIH1D1	protein_coding	PIH1 domain containing 1	7021.44	0.0197145	0.242881	0.0811693	0.935307	0.999962
ENSG00000272970	AC107294.2	lincRNA		1.73397	-4.01192	4.57368	-0.877176	0.380391	0.999911
ENSG00000227101	AC025822.1	lincRNA		3.74906	-4.18923	4.53856	-0.923031	0.355991	0.996495
ENSG00000200494	RF00019	misc_RNA		1.24777	-2.27218	3.70519	-0.613243	0.539716	0.999962
ENSG00000172809	RPL38	protein_coding	ribosomal protein L38	10190.3	0.00894332	0.188852	0.0473563	0.962229	0.999962
ENSG00000151576	QTRT2	protein_coding	queuine tRNA-ribosyltransferase accessory subunit 2	428.074	-0.123571	0.307703	-0.401591	0.687985	0.999962
ENSG00000225555	AP000320.1	antisense		1.25241	0.22627	4.5665	0.0495499	0.960481	0.999962
ENSG00000140319	SRP14	protein_coding	signal recognition particle 14	2710.23	0.0438799	0.308888	0.142058	0.887034	0.999962
ENSG00000242349	NPPA-AS1	antisense	NPPA antisense RNA 1	27.8259	-1.75709	1.39704	-1.25773	0.208491	0.908552
ENSG00000127947	PTPN12	protein_coding	protein tyrosine phosphatase, non-receptor type 12	603.247	-0.784114	0.304419	-2.57578	0.0100015	0.112153
ENSG00000178297	TMPRSS9	protein_coding	transmembrane serine protease 9	5.03497	2.29024	2.99491	0.764712	0.444443	0.999962
ENSG00000261121	LINC02473	lincRNA	long intergenic non-protein coding RNA 2473	1.90199	-13.2289	4.67466	-2.82992	0.00465595	0.0565123
ENSG00000106615	RHEB	protein_coding	Ras homolog, mTORC1 binding	5443.92	0.0973165	0.222412	0.43755	0.661713	0.999962
ENSG00000100302	RASD2	protein_coding	RASD family member 2	7.19052	-0.332056	2.96662	-0.111931	0.910878	0.999962
ENSG00000111371	SLC38A1	protein_coding	solute carrier family 38 member 1	109.092	0.479547	1.17692	0.40746	0.68367	0.999962
ENSG00000117242	PINK1-AS	antisense	PINK1 antisense RNA	5892.7	0.123325	0.211145	0.584077	0.559168	0.999962
ENSG00000255875	AC008813.1	processed_pseudogene		0.476048	16.3229	4.63146	3.52435	0.000424516	0.00675285
ENSG00000228007	AC011933.1	processed_pseudogene		11.8246	-0.309916	1.47129	-0.210642	0.833167	0.999962
ENSG00000270800	RPS10-NUDT3	protein_coding	RPS10-NUDT3 readthrough	279.867	4.73608	1.1919	3.97356	7.08049e-05	0.00235293
ENSG00000081692	JMJD4	protein_coding	jumonji domain containing 4	6492.21	-0.258952	0.522021	-0.496056	0.619855	0.999962
ENSG00000167371	PRRT2	protein_coding	proline rich transmembrane protein 2	93.0073	-0.159685	0.442622	-0.36077	0.718271	0.999962
ENSG00000228925	AC016722.2	antisense		14.3093	-4.30321	1.90332	-2.26089	0.0237659	0.232363
ENSG00000227252	AC105760.2	antisense		45.9906	-0.387528	1.17969	-0.328501	0.742533	0.999962
ENSG00000275881	RF00017	misc_RNA		0.489343	-0.33658	4.59866	-0.0731908	0.941654	0.999962
ENSG00000231006	RPL7P32	processed_pseudogene	ribosomal protein L7 pseudogene 32	79.624	0.473407	0.524341	0.902861	0.366599	0.997681
ENSG00000160949	TONSL	protein_coding	tonsoku like, DNA repair protein	19382.5	0.138529	0.238137	0.581721	0.560755	0.999962
ENSG00000267573	KRT8P5	processed_pseudogene	keratin 8 pseudogene 5	0.667543	-13.9017	4.67466	-2.97384	0.00294099	0.0372048
ENSG00000179195	ZNF664	protein_coding	zinc finger protein 664	1987.39	-0.00308956	0.647129	-0.00477426	0.996191	0.999962
ENSG00000230568	SF3A3P1	processed_pseudogene	splicing factor 3a, subunit 3 pseudogene 1	12.7976	0.800782	1.35563	0.590708	0.554716	0.999962
ENSG00000105397	TYK2	protein_coding	tyrosine kinase 2	25067.8	0.0888333	0.209526	0.423972	0.671586	0.999962
ENSG00000134183	GNAT2	protein_coding	G protein subunit alpha transducin 2	1.03177	0.830798	4.61103	0.180176	0.857014	0.999962
ENSG00000253509	AC104393.1	sense_intronic		0.41578	-18.2099	4.6474	-3.9183	8.91768e-05	0.00244958
ENSG00000230615	AL139220.2	lincRNA		18.0576	-2.53893	1.4136	-1.79608	0.0724822	0.522643
ENSG00000136770	DNAJC1	protein_coding	DnaJ heat shock protein family (Hsp40) member C1	540.002	0.190351	0.368487	0.516575	0.605453	0.999962
ENSG00000161912	ADCY10P1	transcribed_unprocessed_pseudogene	adenylate cyclase 10, soluble pseudogene 1	22.2943	0.748462	1.00407	0.745427	0.456014	0.999962
ENSG00000144199	FAHD2B	protein_coding	fumarylacetoacetate hydrolase domain containing 2B	3621.77	-0.0720885	0.243158	-0.296467	0.766873	0.999962
ENSG00000258100	AC025035.1	lincRNA		0.507794	-4.0344	4.67466	-0.863036	0.388118	0.999911
ENSG00000075131	TIPIN	protein_coding	TIMELESS interacting protein	263.62	-0.191308	0.543901	-0.351734	0.725038	0.999962
ENSG00000246363	LINC02458	lincRNA	long intergenic non-protein coding RNA 2458	8.63803	0.31292	2.58543	0.121032	0.903666	0.999962
ENSG00000184274	LINC00315	lincRNA	long intergenic non-protein coding RNA 315	16.823	-0.411359	1.93308	-0.2128	0.831483	0.999962
ENSG00000100804	PSMB5	protein_coding	proteasome subunit beta 5	21442.1	0.488436	0.281675	1.73404	0.0829108	0.567914
ENSG00000161267	BDH1	protein_coding	3-hydroxybutyrate dehydrogenase 1	2722.55	0.212032	0.15477	1.36998	0.170692	0.833701
ENSG00000143437	ARNT	protein_coding	aryl hydrocarbon receptor nuclear translocator	2933.65	-0.198127	0.184304	-1.075	0.282375	0.963912
ENSG00000258136	AC007622.2	antisense		3.20628	1.02594	3.7303	0.275027	0.783295	0.999962
ENSG00000225439	BOLA3-AS1	antisense	BOLA3 antisense RNA 1 (head to head)	631.26	0.0767217	0.389284	0.197084	0.843762	0.999962
ENSG00000144749	LRIG1	protein_coding	leucine rich repeats and immunoglobulin like domains 1	805.46	-0.164004	0.285027	-0.5754	0.565021	0.999962
ENSG00000134250	NOTCH2	protein_coding	notch 2	9414.49	-0.188588	0.27337	-0.689861	0.490282	0.999962
ENSG00000116833	NR5A2	protein_coding	nuclear receptor subfamily 5 group A member 2	64.5196	1.38485	1.21936	1.13572	0.256075	0.952394
ENSG00000140104	CLBA1	protein_coding	clathrin binding box of aftiphilin containing 1	1209.11	0.283866	0.214983	1.32041	0.186698	0.864318
ENSG00000273381	AL158071.4	lincRNA		0.8783	0.0180208	4.67466	0.00385501	0.996924	0.999962
ENSG00000004700	RECQL	protein_coding	RecQ like helicase	398.949	-0.06742	0.521284	-0.129334	0.897093	0.999962
ENSG00000141560	FN3KRP	protein_coding	fructosamine 3 kinase related protein	6390.89	0.150668	0.196002	0.768709	0.442066	0.999962
ENSG00000282602	Z82244.2	lincRNA		2.6209	6.89667	4.57035	1.509	0.131298	0.733745
ENSG00000246465	AC138904.1	lincRNA		4.89449	-5.5543	4.27143	-1.30034	0.193485	0.878272
ENSG00000228612	HK2P1	processed_pseudogene	hexokinase 2 pseudogene 1	9.92901	0.251827	1.31605	0.19135	0.848251	0.999962
ENSG00000137726	FXYD6	protein_coding	FXYD domain containing ion transport regulator 6	5739.59	0.284971	0.217106	1.31259	0.189322	0.86908
ENSG00000279630	AC190387.1	TEC		0.787734	1.32797	4.66181	0.284862	0.77575	0.999962
ENSG00000237506	RPSAP15	processed_pseudogene	ribosomal protein SA pseudogene 15	2144.42	-0.0322785	0.202946	-0.15905	0.873629	0.999962
ENSG00000159111	MRPL10	protein_coding	mitochondrial ribosomal protein L10	6864.09	-0.192563	0.309471	-0.622231	0.53379	0.999962
ENSG00000235459	RPS26P31	processed_pseudogene	ribosomal protein S26 pseudogene 31	25.4107	-0.095231	0.586843	-0.162277	0.871088	0.999962
ENSG00000232487	RASA3-IT1	sense_intronic	RASA3 intronic transcript 1	13.9247	3.20105	1.48564	2.15466	0.0311888	0.287699
ENSG00000240527	AL365273.1	sense_intronic		33.9083	0.804092	1.01426	0.792787	0.427902	0.999962
ENSG00000163291	PAQR3	protein_coding	progestin and adipoQ receptor family member 3	621.966	-1.04671	0.511331	-2.04704	0.0406544	0.350014
ENSG00000113657	DPYSL3	protein_coding	dihydropyrimidinase like 3	433.364	-0.529266	0.3543	-1.49384	0.135218	0.744958
ENSG00000169429	CXCL8	protein_coding	C-X-C motif chemokine ligand 8	1982.99	0.737375	0.928131	0.794473	0.42692	0.999962
ENSG00000025770	NCAPH2	protein_coding	non-SMC condensin II complex subunit H2	22559.8	0.192338	0.234684	0.819561	0.412467	0.999962
ENSG00000237574	LINC01856	lincRNA	long intergenic non-protein coding RNA 1856	0.390757	-4.44077	4.67466	-0.949966	0.342129	0.989184
ENSG00000240342	RPS2P5	processed_pseudogene	ribosomal protein S2 pseudogene 5	51779.5	0.0196904	0.179032	0.109982	0.912423	0.999962
ENSG00000270733	AL355877.2	processed_pseudogene		1.05218	0.476752	4.62037	0.103185	0.917816	0.999962
ENSG00000163297	ANTXR2	protein_coding	anthrax toxin receptor 2	229.106	-0.553236	0.373192	-1.48244	0.138223	0.753313
ENSG00000284471	CR769775.4	TEC		5.39932	2.58683	3.77977	0.684387	0.493731	0.999962
ENSG00000034053	APBA2	protein_coding	amyloid beta precursor protein binding family A member 2	2612.68	-0.36325	0.301291	-1.20565	0.227954	0.938769
ENSG00000173436	MINOS1	protein_coding	mitochondrial inner membrane organizing system 1	3275.15	0.00721873	0.190806	0.0378328	0.969821	0.999962
ENSG00000197852	FAM212B	protein_coding	family with sequence similarity 212 member B	490.3	0.493095	0.606632	0.81284	0.41631	0.999962
ENSG00000163536	SERPINI1	protein_coding	serpin family I member 1	142.245	0.9255	1.25812	0.735623	0.46196	0.999962
ENSG00000197054	ZNF763	protein_coding	zinc finger protein 763	14.0581	-1.06171	1.81079	-0.586324	0.557658	0.999962
ENSG00000198833	UBE2J1	protein_coding	ubiquitin conjugating enzyme E2 J1	3034.97	0.105188	0.286365	0.36732	0.71338	0.999962
ENSG00000267365	KCNJ2-AS1	antisense	KCNJ2 antisense RNA 1 (head to head)	18.9362	1.07572	1.53986	0.698587	0.48481	0.999962
ENSG00000163508	EOMES	protein_coding	eomesodermin	228.863	-0.345083	0.564154	-0.611683	0.540748	0.999962
ENSG00000270482	AC026367.1	lincRNA		0.759449	-12.38	4.67466	-2.64833	0.00808911	0.0928084
ENSG00000258572	AL133467.1	lincRNA		15.1698	-4.06593	1.54753	-2.62736	0.00860509	0.0982733
ENSG00000260992	DOCK9-AS2	antisense	DOCK9 antisense RNA 2 (head to head)	33.8454	0.0358869	0.769739	0.0466222	0.962814	0.999962
ENSG00000167807	AC011511.1	protein_coding		757.432	0.598989	0.43421	1.37949	0.167743	0.825954
ENSG00000183578	TNFAIP8L3	protein_coding	TNF alpha induced protein 8 like 3	1.89883	-0.775964	4.56276	-0.170065	0.864959	0.999962
ENSG00000265222	AC079336.2	sense_intronic		57.8136	-0.0314583	0.960249	-0.0327606	0.973866	0.999962
ENSG00000124664	SPDEF	protein_coding	SAM pointed domain containing ETS transcription factor	3.14459	-11.0669	4.67466	-2.36743	0.0179123	0.18377
ENSG00000116299	KIAA1324	protein_coding	KIAA1324	490.544	1.65374	0.883586	1.87162	0.0612591	0.469078
ENSG00000263335	AF001548.2	antisense		56.7977	0.0399946	2.0468	0.0195401	0.98441	0.999962
ENSG00000277775	HIST1H3F	protein_coding	histone cluster 1 H3 family member f	22.2864	-0.425834	1.38914	-0.306546	0.759189	0.999962
ENSG00000142233	NTN5	protein_coding	netrin 5	5.61435	-5.54791	3.32626	-1.66791	0.0953327	0.616889
ENSG00000139890	REM2	protein_coding	RRAD and GEM like GTPase 2	23.3255	1.20266	2.01725	0.596188	0.55105	0.999962
ENSG00000170743	SYT9	protein_coding	synaptotagmin 9	1.11497	-10.2906	4.67466	-2.20136	0.0277105	0.263723
ENSG00000196581	AJAP1	protein_coding	adherens junctions associated protein 1	4.75406	-0.885623	4.53741	-0.195182	0.84525	0.999962
ENSG00000189052	CGB5	protein_coding	chorionic gonadotropin beta subunit 5	4.36052	0.023353	4.61852	0.00505639	0.995966	0.999962
ENSG00000143384	MCL1	protein_coding	MCL1, BCL2 family apoptosis regulator	8184.55	0.0394275	0.240153	0.164177	0.869592	0.999962
ENSG00000260007	AC107871.1	protein_coding		206.686	-0.278232	0.693496	-0.401202	0.688271	0.999962
ENSG00000223876	RPS27P1	processed_pseudogene	ribosomal protein S27 pseudogene 1	0.40066	-5.33652	4.67466	-1.14158	0.253627	0.949576
ENSG00000283684	AC013268.5	processed_transcript		188.81	2.43509	1.03458	2.3537	0.0185876	0.189485
ENSG00000162692	VCAM1	protein_coding	vascular cell adhesion molecule 1	108.041	0.705393	2.17629	0.324126	0.745843	0.999962
ENSG00000132429	POPDC3	protein_coding	popeye domain containing 3	652.245	0.291466	0.237887	1.22523	0.220488	0.928821
ENSG00000240395	RPL5P23	processed_pseudogene	ribosomal protein L5 pseudogene 23	28.4355	0.696668	0.837824	0.831521	0.405679	0.999962
ENSG00000261195	AC027130.1	antisense		116.027	-0.535226	0.718197	-0.745235	0.45613	0.999962
ENSG00000269737	AL691432.1	transcribed_processed_pseudogene		98.8098	-0.357998	0.669014	-0.535113	0.592572	0.999962
ENSG00000177169	ULK1	protein_coding	unc-51 like autophagy activating kinase 1	11235.6	-0.0190767	0.181363	-0.105185	0.916229	0.999962
ENSG00000226783	TLK1P1	processed_pseudogene	tousled like kinase 1 pseudogene 1	1.12805	-7.21412	4.59487	-1.57004	0.116406	0.690003
ENSG00000162694	EXTL2	protein_coding	exostosin like glycosyltransferase 2	673.96	0.484683	0.483031	1.00342	0.315658	0.987175
ENSG00000185630	PBX1	protein_coding	PBX homeobox 1	530.911	0.570941	0.373409	1.529	0.126265	0.720852
ENSG00000188186	LAMTOR4	protein_coding	late endosomal/lysosomal adaptor, MAPK and MTOR activator 4	6993.81	-0.050644	0.202684	-0.249867	0.80269	0.999962
ENSG00000122068	FYTTD1	protein_coding	forty-two-three domain containing 1	1418.83	0.218126	0.54985	0.396701	0.691588	0.999962
ENSG00000235961	PNMA6A	protein_coding	PNMA family member 6A	6444.21	-0.447421	0.227469	-1.96695	0.0491886	0.400818
ENSG00000278107	AC027575.2	lincRNA		22.6626	1.42306	1.40779	1.01085	0.312089	0.985715
ENSG00000146221	TCTE1	protein_coding	t-complex-associated-testis-expressed 1	1.30493	0.158103	4.58494	0.034483	0.972492	0.999962
ENSG00000168243	GNG4	protein_coding	G protein subunit gamma 4	220.968	0.861636	0.92458	0.931922	0.351377	0.994076
ENSG00000253522	MIR3142HG	lincRNA	MIR3142 host gene	208.192	-0.0621464	0.822785	-0.0755318	0.939792	0.999962
ENSG00000182747	SLC35D3	protein_coding	solute carrier family 35 member D3	2.86848	14.7914	4.64864	3.18188	0.00146325	0.0200261
ENSG00000186480	INSIG1	protein_coding	insulin induced gene 1	3694.43	0.00673804	0.295793	0.0227795	0.981826	0.999962
ENSG00000284630	AP000553.5	transcribed_unitary_pseudogene		18.3513	1.91103	1.61059	1.18654	0.235407	0.944404
ENSG00000145949	MYLK4	protein_coding	myosin light chain kinase family member 4	23.8978	0.729155	1.8336	0.397664	0.690878	0.999962
ENSG00000143382	ADAMTSL4	protein_coding	ADAMTS like 4	537.207	0.201957	0.352147	0.573502	0.566305	0.999962
ENSG00000221916	C19orf73	protein_coding	chromosome 19 open reading frame 73	73.9116	1.18676	0.577865	2.0537	0.0400044	0.346387
ENSG00000154556	SORBS2	protein_coding	sorbin and SH3 domain containing 2	199.783	1.71928	0.84345	2.0384	0.0415103	0.354951
ENSG00000256150	AC092471.2	processed_transcript		10.8521	1.39749	1.82716	0.764843	0.444365	0.999962
ENSG00000256229	ZNF486	protein_coding	zinc finger protein 486	71.206	-0.593033	0.846976	-0.700177	0.483817	0.999962
ENSG00000119522	DENND1A	protein_coding	DENN domain containing 1A	3607.9	0.103483	0.284505	0.363731	0.716059	0.999962
ENSG00000154451	GBP5	protein_coding	guanylate binding protein 5	188.525	0.90399	1.22534	0.737744	0.46067	0.999962
ENSG00000155275	TRMT44	protein_coding	tRNA methyltransferase 44 homolog	822.345	0.0901891	0.300241	0.300389	0.763881	0.999962
ENSG00000118849	RARRES1	protein_coding	retinoic acid receptor responder 1	44.3042	1.95863	1.33163	1.47086	0.14133	0.762141
ENSG00000106610	STAG3L4	transcribed_unprocessed_pseudogene	stromal antigen 3-like 4 (pseudogene)	592.017	-0.134777	0.294722	-0.457301	0.647455	0.999962
ENSG00000112619	PRPH2	protein_coding	peripherin 2	12.9215	3.07068	1.84665	1.66284	0.0963453	0.621817
ENSG00000184351	KRTAP19-1	protein_coding	keratin associated protein 19-1	125.014	0.316294	0.494465	0.639668	0.522388	0.999962
ENSG00000243649	CFB	protein_coding	complement factor B	4.95266	-12.7617	4.67466	-2.72998	0.00633382	0.0741414
ENSG00000282897	AL162727.3	TEC		14.1419	4.48807	2.21979	2.02184	0.0431928	0.365827
ENSG00000229001	ACTBP14	processed_pseudogene	actin, beta pseudogene 14	0.770582	0.294651	4.62238	0.0637444	0.949174	0.999962
ENSG00000264304	AC024267.3	antisense		9.8989	-2.11516	2.24007	-0.944241	0.345046	0.989184
ENSG00000241014	AC114490.1	transcribed_unitary_pseudogene		7.65934	1.23839	1.74999	0.707654	0.47916	0.999962
ENSG00000246145	RRS1-AS1	lincRNA	RRS1 antisense RNA 1 (head to head)	0.833995	17.4809	4.646	3.76257	0.000168179	0.00365157
ENSG00000153107	ANAPC1	protein_coding	anaphase promoting complex subunit 1	1505.11	-0.134804	0.388616	-0.346883	0.728679	0.999962
ENSG00000275582	AL031670.1	antisense		22.5232	-1.47764	1.44444	-1.02299	0.306314	0.97918
ENSG00000224773	HSPA8P7	processed_pseudogene	heat shock protein family A (Hsp70) member 8 pseudogene 7	1.7727	15.4905	4.64755	3.33304	0.000859039	0.012418
ENSG00000129596	CDO1	protein_coding	cysteine dioxygenase type 1	14.9993	4.75069	2.83183	1.6776	0.0934248	0.610142
ENSG00000141505	ASGR1	protein_coding	asialoglycoprotein receptor 1	7.75487	0.141215	3.40769	0.0414403	0.966945	0.999962
ENSG00000273345	AC104109.4	processed_transcript		7.4489	-1.89384	2.51725	-0.752346	0.451843	0.999962
ENSG00000064419	TNPO3	protein_coding	transportin 3	3038.24	-0.180739	0.300405	-0.601649	0.547408	0.999962
ENSG00000165282	PIGO	protein_coding	phosphatidylinositol glycan anchor biosynthesis class O	10020.3	-0.159871	0.263717	-0.606222	0.544367	0.999962
ENSG00000236156	CHCHD4P3	processed_pseudogene	coiled-coil-helix-coiled-coil-helix domain containing 4 pseudogene 3	27.6681	2.24215	1.32253	1.69535	0.0900084	0.596459
ENSG00000170906	NDUFA3	protein_coding	NADH:ubiquinone oxidoreductase subunit A3	17.1297	-0.795939	2.6726	-0.297814	0.765845	0.999962
ENSG00000270344	POC1B-AS1	antisense	POC1B antisense RNA 1	13.2277	-0.152557	1.25623	-0.121441	0.903342	0.999962
ENSG00000259417	CTXND1	protein_coding	cortexin domain containing 1	1120.28	0.191458	0.230323	0.831259	0.405827	0.999962
ENSG00000206702	RNU1-11P	snRNA	RNA, U1 small nuclear 11, pseudogene	0.477081	-18.2848	4.64628	-3.93536	8.30717e-05	0.00244958
ENSG00000268746	AC010519.1	lincRNA		3.7858	0.717724	2.8664	0.250392	0.802284	0.999962
ENSG00000265590	AP000275.2	protein_coding		17.0384	-0.773429	2.31076	-0.334707	0.737846	0.999962
ENSG00000182487	NCF1B	transcribed_unprocessed_pseudogene	neutrophil cytosolic factor 1B pseudogene	1.16119	-4.1141	4.67466	-0.880086	0.378813	0.999059
ENSG00000148200	NR6A1	protein_coding	nuclear receptor subfamily 6 group A member 1	284.932	-0.274557	0.405922	-0.676379	0.4988	0.999962
ENSG00000224117	PTPN2P2	processed_pseudogene	protein tyrosine phosphatase, non-receptor type 2 pseudogene 2	0.744237	0.0645849	4.60378	0.0140287	0.988807	0.999962
ENSG00000199785	SNORA52	snoRNA	small nucleolar RNA, H/ACA box 52	17.1557	-0.975699	1.02262	-0.954119	0.340023	0.989184
ENSG00000261229	AC021483.2	lincRNA		4.9773	-1.6852	2.5317	-0.665641	0.50564	0.999962
ENSG00000155254	MARVELD1	protein_coding	MARVEL domain containing 1	65546	-0.185304	0.266913	-0.694248	0.487527	0.999962
ENSG00000224763	FDPSP8	processed_pseudogene	farnesyl diphosphate synthase pseudogene 8	0.788875	0.664905	4.62207	0.143854	0.885615	0.999962
ENSG00000157184	CPT2	protein_coding	carnitine palmitoyltransferase 2	4135.24	0.0146943	0.21869	0.0671923	0.946429	0.999962
ENSG00000197815	AC122129.1	antisense		114.009	-0.177801	0.696279	-0.255359	0.798446	0.999962
ENSG00000167699	GLOD4	protein_coding	glyoxalase domain containing 4	3541.29	-0.403237	0.313983	-1.28426	0.19905	0.888875
ENSG00000155252	PI4K2A	protein_coding	phosphatidylinositol 4-kinase type 2 alpha	15132.1	-0.044775	0.205611	-0.217766	0.827611	0.999962
ENSG00000275072	SNORD50B	snoRNA	small nucleolar RNA, C/D box 50B	0.723724	1.53727	3.15318	0.487531	0.625882	0.999962
ENSG00000134986	NREP	protein_coding	neuronal regeneration related protein	125.57	0.664165	0.541608	1.22628	0.220092	0.928084
ENSG00000198517	MAFK	protein_coding	MAF bZIP transcription factor K	18038.8	-0.086447	0.339731	-0.254457	0.799142	0.999962
ENSG00000100802	C14orf93	protein_coding	chromosome 14 open reading frame 93	801.445	0.103156	0.345168	0.298857	0.765049	0.999962
ENSG00000115556	PLCD4	protein_coding	phospholipase C delta 4	1166.8	0.101596	0.210306	0.483087	0.629034	0.999962
ENSG00000054523	KIF1B	protein_coding	kinesin family member 1B	1639.9	-0.209912	0.2521	-0.832654	0.40504	0.999962
ENSG00000026297	RNASET2	protein_coding	ribonuclease T2	845.529	-0.0708339	0.16793	-0.421805	0.673167	0.999962
ENSG00000138326	RPS24	protein_coding	ribosomal protein S24	4583.34	-0.0559882	0.286178	-0.195641	0.844891	0.999962
ENSG00000165323	FAT3	protein_coding	FAT atypical cadherin 3	3.18027	5.60484	4.54627	1.23284	0.217634	0.924189
ENSG00000257647	AC124312.2	lincRNA		0.401665	-4.98169	4.67466	-1.06568	0.286568	0.963912
ENSG00000213445	SIPA1	protein_coding	signal-induced proliferation-associated 1	19899.9	0.0549597	0.228129	0.240915	0.809621	0.999962
ENSG00000262803	AL354943.1	processed_pseudogene		0.268278	16.4884	4.64682	3.54832	0.000387696	0.00626219
ENSG00000116688	MFN2	protein_coding	mitofusin 2	20148.6	-0.0880861	0.24171	-0.364429	0.715538	0.999962
ENSG00000204282	TNRC6C-AS1	processed_transcript	TNRC6C antisense RNA 1	351.83	-0.323678	0.405365	-0.798486	0.424589	0.999962
ENSG00000184434	LRRC19	protein_coding	leucine rich repeat containing 19	4.32147	-1.35622	3.89489	-0.348205	0.727686	0.999962
ENSG00000225602	MTOR-AS1	antisense	MTOR antisense RNA 1	0.623875	-19.1061	4.646	-4.11237	3.91611e-05	0.00177554
ENSG00000165325	DEUP1	protein_coding	deuterosome assembly protein 1	2.94641	0.913662	4.62424	0.197581	0.843373	0.999962
ENSG00000076067	RBMS2	protein_coding	RNA binding motif single stranded interacting protein 2	1949.75	0.0217996	0.380834	0.0572418	0.954353	0.999962
ENSG00000185565	LSAMP	protein_coding	limbic system-associated membrane protein	1066.18	-0.111267	0.225814	-0.492737	0.622199	0.999962
ENSG00000163682	RPL9	protein_coding	ribosomal protein L9	9388	-0.0762425	0.165238	-0.461411	0.644504	0.999962
ENSG00000174946	GPR171	protein_coding	G protein-coupled receptor 171	0.238469	16.8432	4.64703	3.6245	0.000289519	0.00529469
ENSG00000232762	AL355483.3	antisense		1.64146	13.0731	4.64674	2.8134	0.00490209	0.0592622
ENSG00000276412	AL591926.3	processed_pseudogene		1.02187	-21.699	4.64975	-4.66669	3.06089e-06	0.000305633
ENSG00000111846	GCNT2	protein_coding	glucosaminyl (N-acetyl) transferase 2, I-branching enzyme (I blood group)	2233.36	-0.275306	0.351769	-0.782633	0.433843	0.999962
ENSG00000266976	AC079466.1	lincRNA		1.12691	-21.106	4.64749	-4.54138	5.5887e-06	0.000486538
ENSG00000136490	LIMD2	protein_coding	LIM domain containing 2	10187.4	0.034268	0.247677	0.138358	0.889958	0.999962
ENSG00000184209	SNRNP35	protein_coding	small nuclear ribonucleoprotein U11/U12 subunit 35	2010.99	0.239508	0.153806	1.5572	0.119422	0.697987
ENSG00000136485	DCAF7	protein_coding	DDB1 and CUL4 associated factor 7	17620.8	-0.256255	0.201798	-1.26986	0.204135	0.900938
ENSG00000279311	AC092999.1	TEC		2.04702	-1.57274	4.59543	-0.342239	0.732171	0.999962
ENSG00000258323	AC073575.1	antisense		0.287318	-18.4439	4.64704	-3.96896	7.21881e-05	0.00235293
ENSG00000155366	RHOC	protein_coding	ras homolog family member C	29540.2	0.220272	0.206829	1.06499	0.286878	0.963912
ENSG00000064309	CDON	protein_coding	cell adhesion associated, oncogene regulated	865.007	-0.182246	0.238924	-0.762779	0.445595	0.999962
ENSG00000013306	SLC25A39	protein_coding	solute carrier family 25 member 39	42718.3	-0.0290174	0.188457	-0.153974	0.877631	0.999962
ENSG00000120742	SERP1	protein_coding	stress associated endoplasmic reticulum protein 1	5328.99	-0.141876	0.202021	-0.70228	0.482504	0.999962
ENSG00000101290	CDS2	protein_coding	CDP-diacylglycerol synthase 2	12519.9	-0.162336	0.189477	-0.856761	0.391577	0.999962
ENSG00000229558	SACS-AS1	lincRNA	SACS antisense RNA 1	0.869931	0.271097	4.62225	0.0586503	0.953231	0.999962
ENSG00000137507	LRRC32	protein_coding	leucine rich repeat containing 32	31.5679	1.24936	1.65578	0.754545	0.450522	0.999962
ENSG00000279758	AC105339.5	TEC		1.00866	-17.2894	4.62699	-3.73665	0.000186492	0.00389702
ENSG00000172795	DCP2	protein_coding	decapping mRNA 2	481.427	0.287295	0.558597	0.514315	0.607032	0.999962
ENSG00000231952	DPY19L1P2	unprocessed_pseudogene	DPY19L1 pseudogene 2	1.45782	-1.09594	4.56588	-0.240028	0.810308	0.999962
ENSG00000223485	LINC01615	lincRNA	long intergenic non-protein coding RNA 1615	23.701	-2.57469	1.77909	-1.4472	0.147841	0.77723
ENSG00000198183	BPIFA1	protein_coding	BPI fold containing family A member 1	13.4167	1.54994	3.58723	0.432071	0.66569	0.999962
ENSG00000244515	KRT18P34	processed_pseudogene	keratin 18 pseudogene 34	5.63839	0.412365	2.71733	0.151754	0.879381	0.999962
ENSG00000131115	ZNF227	protein_coding	zinc finger protein 227	117.582	-0.000654574	0.651556	-0.00100463	0.999198	0.999962
ENSG00000221923	ZNF880	protein_coding	zinc finger protein 880	135.95	-0.48763	0.439971	-1.10832	0.267723	0.961285
ENSG00000272650	AC110792.3	lincRNA		1.42554	13.5444	4.65276	2.91104	0.00360226	0.0448005
ENSG00000258378	AL139021.1	antisense		0.356142	-5.3493	4.67466	-1.14432	0.252492	0.949576
ENSG00000196341	OR8D1	protein_coding	olfactory receptor family 8 subfamily D member 1	0.738115	0.0180093	4.67466	0.00385253	0.996926	0.999962
ENSG00000147677	EIF3H	protein_coding	eukaryotic translation initiation factor 3 subunit H	2548.02	0.0306637	0.22458	0.136538	0.891396	0.999962
ENSG00000004838	ZMYND10	protein_coding	zinc finger MYND-type containing 10	351.956	-0.0536994	0.344555	-0.155851	0.87615	0.999962
ENSG00000138778	CENPE	protein_coding	centromere protein E	7.81579	3.17903	3.88125	0.819074	0.412744	0.999962
ENSG00000055332	EIF2AK2	protein_coding	eukaryotic translation initiation factor 2 alpha kinase 2	678.739	-0.055488	0.478535	-0.115954	0.907689	0.999962
ENSG00000272677	AC124016.1	antisense		32.0097	-1.161	1.16138	-0.999673	0.317469	0.988087
ENSG00000012211	PRICKLE3	protein_coding	prickle planar cell polarity protein 3	2724.47	-0.204125	0.231528	-0.881644	0.377969	0.999059
ENSG00000173818	ENDOV	protein_coding	endonuclease V	1225.58	0.467048	0.258754	1.80499	0.0710767	0.515784
ENSG00000205420	KRT6A	protein_coding	keratin 6A	0.44432	-4.43598	4.67466	-0.94894	0.342651	0.989184
ENSG00000149262	INTS4	protein_coding	integrator complex subunit 4	1001.73	-0.232107	0.305627	-0.759444	0.447587	0.999962
ENSG00000140416	TPM1	protein_coding	tropomyosin 1	1147.05	0.0512685	0.368343	0.139187	0.889303	0.999962
ENSG00000143409	MINDY1	protein_coding	MINDY lysine 48 deubiquitinase 1	5464.24	-0.247521	0.254119	-0.974036	0.330038	0.989184
ENSG00000158125	XDH	protein_coding	xanthine dehydrogenase	58.4193	-1.46677	1.52391	-0.962507	0.335795	0.989184
ENSG00000220494	YAP1P1	processed_pseudogene	Yes associated protein 1 pseudogene 1	1.19331	17.1795	4.62112	3.71761	0.000201114	0.00411345
ENSG00000185614	FAM212A	protein_coding	family with sequence similarity 212 member A	1113.57	0.42676	0.272047	1.5687	0.116717	0.690844
ENSG00000180776	ZDHHC20	protein_coding	zinc finger DHHC-type containing 20	1806.26	-0.280221	0.400828	-0.699106	0.484486	0.999962
ENSG00000224163	AC025594.1	unprocessed_pseudogene		1.24734	-2.68482	4.60363	-0.583195	0.559762	0.999962
ENSG00000273402	AC004908.3	antisense		3.10206	8.23879	4.54098	1.81432	0.0696285	0.508525
ENSG00000116871	MAP7D1	protein_coding	MAP7 domain containing 1	50661.6	0.0627506	0.167893	0.373754	0.708587	0.999962
ENSG00000250909	AC138956.1	antisense		3.66715	-8.86253	3.99275	-2.21965	0.0264423	0.254513
ENSG00000162909	CAPN2	protein_coding	calpain 2	9008.97	0.163379	0.28927	0.564797	0.572212	0.999962
ENSG00000167703	SLC43A2	protein_coding	solute carrier family 43 member 2	467.519	0.058232	0.443145	0.131406	0.895454	0.999962
ENSG00000137494	ANKRD42	protein_coding	ankyrin repeat domain 42	312.266	-0.619048	0.324986	-1.90484	0.0568005	0.445966
ENSG00000274111	MIR6777	miRNA	microRNA 6777	6.45894	1.63128	1.53393	1.06346	0.287573	0.963912
ENSG00000119714	GPR68	protein_coding	G protein-coupled receptor 68	15.7446	2.56111	2.22715	1.14995	0.250165	0.949576
ENSG00000279179	AL662907.2	TEC		59.0592	-1.12315	0.645793	-1.73918	0.0820037	0.564767
ENSG00000136819	C9orf78	protein_coding	chromosome 9 open reading frame 78	1674.14	-0.0987637	0.25111	-0.393308	0.694092	0.999962
ENSG00000186952	TMEM232	protein_coding	transmembrane protein 232	8.23402	1.31146	1.67446	0.783214	0.433502	0.999962
ENSG00000272667	AC012306.2	lincRNA		336.631	-0.343386	0.421039	-0.81557	0.414746	0.999962
ENSG00000183682	BMP8A	protein_coding	bone morphogenetic protein 8a	10.2221	-1.07079	2.14485	-0.499239	0.617611	0.999962
ENSG00000279588	AC087762.2	TEC		2.16031	-10.1371	4.67466	-2.16851	0.0301197	0.280496
ENSG00000066117	SMARCD1	protein_coding	SWI/SNF related, matrix associated, actin dependent regulator of chromatin, subfamily d, member 1	6838.25	-0.461186	0.242829	-1.89922	0.0575351	0.450122
ENSG00000103222	ABCC1	protein_coding	ATP binding cassette subfamily C member 1	2932.82	-0.154168	0.295818	-0.521158	0.602257	0.999962
ENSG00000214278	AC010442.2	processed_pseudogene		0.356383	-17.7419	4.64777	-3.81729	0.000134926	0.00308951
ENSG00000269984	AC078795.1	antisense		10.9845	2.51694	2.35261	1.06985	0.284687	0.963912
ENSG00000145192	AHSG	protein_coding	alpha 2-HS glycoprotein	0.950355	-19.594	4.64615	-4.21725	2.473e-05	0.00140097
ENSG00000105227	PRX	protein_coding	periaxin	1291.19	-0.00376692	0.409127	-0.00920722	0.992654	0.999962
ENSG00000137496	IL18BP	protein_coding	interleukin 18 binding protein	460.829	0.34391	0.466953	0.7365	0.461427	0.999962
ENSG00000115415	STAT1	protein_coding	signal transducer and activator of transcription 1	3235.08	0.404643	0.434885	0.93046	0.352133	0.994076
ENSG00000280594	BTG3-AS1	processed_transcript	BTG3 antisense RNA 1	66.1716	-0.118146	0.388466	-0.304136	0.761025	0.999962
ENSG00000123815	COQ8B	protein_coding	coenzyme Q8B	16465.2	0.302351	0.243352	1.24244	0.214073	0.918769
ENSG00000274956	AC120042.3	lincRNA		2.12341	-0.943978	4.61803	-0.204411	0.838032	0.999962
ENSG00000158545	ZC3H18	protein_coding	zinc finger CCCH-type containing 18	6538.73	-0.262107	0.224358	-1.16825	0.242704	0.949576
ENSG00000103199	ZNF500	protein_coding	zinc finger protein 500	3943.57	-0.024151	0.251183	-0.0961492	0.923402	0.999962
ENSG00000103197	TSC2	protein_coding	TSC complex subunit 2	24268.9	-0.164379	0.252924	-0.649916	0.515747	0.999962
ENSG00000143093	STRIP1	protein_coding	striatin interacting protein 1	4192.4	-0.212655	0.169647	-1.25351	0.210019	0.911459
ENSG00000273327	OR6L2P	unprocessed_pseudogene	olfactory receptor family 6 subfamily L member 2 pseudogene	2.77575	-0.5485	3.44336	-0.159292	0.873439	0.999962
ENSG00000067365	METTL22	protein_coding	methyltransferase like 22	963.978	0.131817	0.250305	0.526626	0.598453	0.999962
ENSG00000235059	AC008175.1	lincRNA		0.40066	-5.33652	4.67466	-1.14158	0.253627	0.949576
ENSG00000249504	PCDHA14	transcribed_unprocessed_pseudogene	protocadherin alpha 14 pseudogene	3.29633	-13.9293	4.67466	-2.97974	0.0028849	0.0365801
ENSG00000215158	AC138409.2	transcribed_unprocessed_pseudogene		7.26526	-0.124936	1.88149	-0.0664029	0.947057	0.999962
ENSG00000167962	ZNF598	protein_coding	zinc finger protein 598	8591.31	-0.11756	0.195497	-0.60134	0.547614	0.999962
ENSG00000279455	AC117500.5	TEC		2.24788	0.049194	4.6326	0.0106191	0.991527	0.999962
ENSG00000204390	HSPA1L	protein_coding	heat shock protein family A (Hsp70) member 1 like	7.51853	-4.84311	3.08743	-1.56866	0.116728	0.690844
ENSG00000277218	AL139123.1	sense_intronic		1.36872	5.61673	4.6031	1.22021	0.222386	0.931509
ENSG00000167705	RILP	protein_coding	Rab interacting lysosomal protein	481.3	-0.856691	2.01797	-0.42453	0.671179	0.999962
ENSG00000274159	AL133243.1	sense_intronic		0.963673	17.9228	4.64628	3.85746	0.000114571	0.00279244
ENSG00000207383	RF00019	misc_RNA		1.78519	-0.890623	3.45932	-0.257456	0.796827	0.999962
ENSG00000227394	AC007386.1	processed_pseudogene		0.889929	-0.781747	4.56244	-0.171344	0.863953	0.999962
ENSG00000227304	AC067942.1	transcribed_processed_pseudogene		2.63839	-0.746631	2.10268	-0.355085	0.722526	0.999962
ENSG00000232927	USP12PY	processed_pseudogene	ubiquitin specific peptidase 12 pseudogene, Y-linked	0.457241	15.9137	4.62863	3.43811	0.000585787	0.00884883
ENSG00000074657	ZNF532	protein_coding	zinc finger protein 532	486.411	0.310175	0.356089	0.87106	0.383721	0.999911
ENSG00000135686	KLHL36	protein_coding	kelch like family member 36	7030.57	0.063941	0.166489	0.384057	0.700937	0.999962
ENSG00000140937	CDH11	protein_coding	cadherin 11	169.013	0.0898083	0.568969	0.157844	0.87458	0.999962
ENSG00000269806	BICRA-AS1	antisense	BICRA antisense RNA 1	1.55675	-2.8109	4.61265	-0.609389	0.542266	0.999962
ENSG00000137868	STRA6	protein_coding	stimulated by retinoic acid 6	3.82701	3.88066	4.57362	0.848488	0.396166	0.999962
ENSG00000274213	AC015912.3	lincRNA		25.3783	-0.524071	1.48885	-0.351997	0.72484	0.999962
ENSG00000074370	ATP2A3	protein_coding	ATPase sarcoplasmic/endoplasmic reticulum Ca2+ transporting 3	1050.92	0.477773	0.47259	1.01097	0.312032	0.985715
ENSG00000280374	AC019080.5	sense_intronic		13.9081	-2.33527	2.00034	-1.16743	0.243036	0.949576
ENSG00000135973	GPR45	protein_coding	G protein-coupled receptor 45	1.60684	-29.9979	4.59698	-6.52556	6.7749e-11	5.15596e-08
ENSG00000111727	HCFC2	protein_coding	host cell factor C2	202.947	-0.129323	0.680903	-0.189928	0.849365	0.999962
ENSG00000278535	DHRS11	protein_coding	dehydrogenase/reductase 11	1018.89	0.0568812	0.273268	0.208152	0.835111	0.999962
ENSG00000196757	ZNF700	protein_coding	zinc finger protein 700	50.7899	-0.156828	1.11113	-0.141144	0.887756	0.999962
ENSG00000171811	CFAP46	protein_coding	cilia and flagella associated protein 46	35.4629	-0.302772	1.47004	-0.205962	0.836821	0.999962
ENSG00000279315	AL158212.4	TEC		3.77338	-4.95014	4.54084	-1.09014	0.275652	0.963912
ENSG00000278291	AL161772.1	antisense		5340.32	0.210858	0.192527	1.09521	0.273425	0.963912
ENSG00000140931	CMTM3	protein_coding	CKLF like MARVEL transmembrane domain containing 3	6488.98	-0.220047	0.281951	-0.780444	0.435129	0.999962
ENSG00000270776	AC012443.1	processed_pseudogene		0.548245	-18.121	4.64732	-3.89923	9.64987e-05	0.00254549
ENSG00000265690	AC074143.1	protein_coding		206.4	-0.0237332	0.789308	-0.0300684	0.976012	0.999962
ENSG00000279827	AC136469.2	TEC		6.22535	-0.50271	4.0135	-0.125255	0.900322	0.999962
ENSG00000234072	AC074117.1	antisense		189.727	0.548437	0.794578	0.690225	0.490053	0.999962
ENSG00000241684	ADAMTS9-AS2	antisense	ADAMTS9 antisense RNA 2	1.15694	0.0179748	4.67466	0.00384516	0.996932	0.999962
ENSG00000167555	ZNF528	protein_coding	zinc finger protein 528	58.5122	-0.17106	0.743594	-0.230044	0.818057	0.999962
ENSG00000117650	NEK2	protein_coding	NIMA related kinase 2	654.547	-0.515366	0.577304	-0.892711	0.372012	0.998664
ENSG00000103226	NOMO3	protein_coding	NODAL modulator 3	6020.91	0.232269	0.293539	0.791271	0.428786	0.999962
ENSG00000169564	PCBP1	protein_coding	poly(rC) binding protein 1	71765.6	0.0252922	0.155371	0.162786	0.870687	0.999962
ENSG00000164932	CTHRC1	protein_coding	collagen triple helix repeat containing 1	339.819	-0.357967	0.272099	-1.31558	0.188317	0.866944
ENSG00000266899	AKR1B1P7	processed_pseudogene	aldo-keto reductase family 1 member B1 pseudogene 7	0.564326	-17.4894	4.62882	-3.77836	0.000157863	0.00346903
ENSG00000070269	TMEM260	protein_coding	transmembrane protein 260	424.424	0.164543	0.639023	0.257492	0.796799	0.999962
ENSG00000233932	CTXN2	protein_coding	cortexin 2	1.4979	-4.98206	4.67466	-1.06576	0.286532	0.963912
ENSG00000131480	AOC2	protein_coding	amine oxidase, copper containing 2	27.737	-0.715268	1.48533	-0.481556	0.630121	0.999962
ENSG00000165632	TAF3	protein_coding	TATA-box binding protein associated factor 3	292.655	-0.172984	0.296034	-0.584338	0.558993	0.999962
ENSG00000213253	RPL12P42	processed_pseudogene	ribosomal protein L12 pseudogene 42	4.15579	17.4942	4.59767	3.80501	0.000141797	0.00319589
ENSG00000251493	FOXD1	protein_coding	forkhead box D1	9.43761	0.0665065	1.93289	0.0344077	0.972552	0.999962
ENSG00000230356	NCAPD2P1	processed_pseudogene	non-SMC condensin I complex subunit D2 pseudogene 1	1.26926	-1.04922	4.61396	-0.2274	0.820112	0.999962
ENSG00000108602	ALDH3A1	protein_coding	aldehyde dehydrogenase 3 family member A1	1.41291	-1.74813	4.59815	-0.380181	0.703811	0.999962
ENSG00000109323	MANBA	protein_coding	mannosidase beta	1591.81	-0.273718	0.222055	-1.23266	0.217704	0.924189
ENSG00000171159	C9orf16	protein_coding	chromosome 9 open reading frame 16	17873.7	-0.111878	0.218735	-0.511477	0.609017	0.999962
ENSG00000261513	AC009097.4	antisense		23.137	-1.00941	1.40599	-0.717938	0.472796	0.999962
ENSG00000129451	KLK10	protein_coding	kallikrein related peptidase 10	3.17297	0.876277	4.61836	0.189738	0.849515	0.999962
ENSG00000213145	CRIP1	protein_coding	cysteine rich protein 1	283.323	0.354469	0.293457	1.20791	0.227081	0.937667
ENSG00000120992	LYPLA1	protein_coding	lysophospholipase I	2707.6	0.204613	0.279059	0.733222	0.463423	0.999962
ENSG00000196954	CASP4	protein_coding	caspase 4	555.781	0.0352563	0.360993	0.0976648	0.922198	0.999962
ENSG00000164930	FZD6	protein_coding	frizzled class receptor 6	615.188	0.326095	0.706332	0.461674	0.644315	0.999962
ENSG00000177200	CHD9	protein_coding	chromodomain helicase DNA binding protein 9	215.902	0.592497	0.574914	1.03058	0.302736	0.977411
ENSG00000205078	SYCE1L	protein_coding	synaptonemal complex central element protein 1 like	185.693	0.68334	0.554062	1.23333	0.217454	0.923859
ENSG00000267394	AC004596.1	antisense		15.8575	-0.0152413	0.85276	-0.017873	0.98574	0.999962
ENSG00000240137	ERICH6-AS1	antisense	ERICH6 antisense RNA 1	17.52	-1.93869	2.11627	-0.916084	0.359623	0.997195
ENSG00000186184	POLR1D	protein_coding	RNA polymerase I subunit D	4644.81	-0.0166934	0.196743	-0.0848487	0.932382	0.999962
ENSG00000213676	ATF6B	protein_coding	activating transcription factor 6 beta	5043.05	-0.211719	0.400017	-0.529275	0.596615	0.999962
ENSG00000241057	AC004951.3	transcribed_unprocessed_pseudogene		6.73804	0.649099	4.51888	0.143641	0.885784	0.999962
ENSG00000128482	RNF112	protein_coding	ring finger protein 112	1.44614	16.4408	4.62028	3.5584	0.000373124	0.00622994
ENSG00000263126	AC040162.3	lincRNA		35.6507	0.26851	0.522664	0.513734	0.607438	0.999962
ENSG00000132341	RAN	protein_coding	RAN, member RAS oncogene family	17651.7	0.0290415	0.16953	0.171306	0.863983	0.999962
ENSG00000257070	AP003170.5	processed_pseudogene		3.55511	1.12391	3.61347	0.311033	0.755776	0.999962
ENSG00000221988	PPT2	protein_coding	palmitoyl-protein thioesterase 2	3.17072	3.49637	1.76265	1.98358	0.0473025	0.390117
ENSG00000112159	MDN1	protein_coding	midasin AAA ATPase 1	298.895	-0.296425	0.672511	-0.440774	0.659377	0.999962
ENSG00000092621	PHGDH	protein_coding	phosphoglycerate dehydrogenase	22120.5	0.0125152	0.198668	0.0629957	0.94977	0.999962
ENSG00000008300	CELSR3	protein_coding	cadherin EGF LAG seven-pass G-type receptor 3	456.214	0.670757	0.365679	1.83428	0.0666126	0.49383
ENSG00000267980	AC007292.1	antisense		57.5334	0.822604	0.65095	1.2637	0.206338	0.904668
ENSG00000158246	FAM46B	protein_coding	family with sequence similarity 46 member B	788.266	-0.046042	0.20549	-0.224059	0.822711	0.999962
ENSG00000279555	AC091181.1	TEC		6.25463	-0.392127	2.04582	-0.191673	0.847999	0.999962
ENSG00000285367	AC087564.1	lincRNA		1.55012	-4.57889	4.57504	-1.00084	0.316903	0.988019
ENSG00000261101	AC234775.3	sense_overlapping		6.55142	2.91335	3.24306	0.898333	0.369008	0.997681
ENSG00000123106	CCDC91	protein_coding	coiled-coil domain containing 91	84.0705	-0.0387808	0.964633	-0.0402027	0.967932	0.999962
ENSG00000230630	DNM3OS	antisense	DNM3 opposite strand/antisense RNA	2.12141	-14.7378	4.67466	-3.15271	0.00161763	0.0219079
ENSG00000151572	ANO4	protein_coding	anoctamin 4	327.472	-1.69855	0.692158	-2.45399	0.0141281	0.150441
ENSG00000096093	EFHC1	protein_coding	EF-hand domain containing 1	284.412	-0.214605	0.423341	-0.506934	0.612201	0.999962
ENSG00000126457	PRMT1	protein_coding	protein arginine methyltransferase 1	23328.2	0.250188	0.174085	1.43716	0.150672	0.784129
ENSG00000240497	AC092919.1	lincRNA		0.951088	-8.84486	4.67466	-1.89209	0.0584795	0.454724
ENSG00000150787	PTS	protein_coding	6-pyruvoyltetrahydropterin synthase	1017.81	0.42675	0.252335	1.6912	0.0907982	0.601108
ENSG00000033050	ABCF2	protein_coding	ATP binding cassette subfamily F member 2	6885.69	0.0303932	0.198786	0.152894	0.878482	0.999962
ENSG00000273874	MIR6859-2	miRNA	microRNA 6859-2	17.6746	0.355321	0.678907	0.523373	0.600715	0.999962
ENSG00000164294	GPX8	protein_coding	glutathione peroxidase 8 (putative)	814.096	-0.163644	0.37784	-0.433105	0.664938	0.999962
ENSG00000203499	IQANK1	protein_coding	IQ motif and ankyrin repeat containing 1	64.2671	1.06049	1.75882	0.602958	0.546536	0.999962
ENSG00000171766	GATM	protein_coding	glycine amidinotransferase	189.487	0.902343	0.819587	1.10097	0.270909	0.963912
ENSG00000198211	AC092143.1	protein_coding		2323.64	-6.9895	2.81468	-2.48323	0.0130196	0.1404
ENSG00000256262	USP30-AS1	antisense	USP30 antisense RNA 1	13.5012	0.441559	2.55835	0.172596	0.862969	0.999962
ENSG00000253833	AC022868.1	processed_pseudogene		7.8964	0.295513	1.21203	0.243816	0.807373	0.999962
ENSG00000226243	RPL37AP1	processed_pseudogene	ribosomal protein L37a pseudogene 1	597.854	0.154094	0.232454	0.6629	0.507395	0.999962
ENSG00000260404	AC110079.1	transcribed_unprocessed_pseudogene		401.279	-0.500909	0.373516	-1.34107	0.179899	0.853217
ENSG00000128340	RAC2	protein_coding	Rac family small GTPase 2	74.3446	-0.0529269	0.546129	-0.0969129	0.922796	0.999962
ENSG00000118503	TNFAIP3	protein_coding	TNF alpha induced protein 3	1185.97	0.323124	0.362406	0.891608	0.372603	0.998664
ENSG00000151304	SRFBP1	protein_coding	serum response factor binding protein 1	52.1762	1.79714	1.25914	1.42728	0.153499	0.792328
ENSG00000104524	PYCR3	protein_coding	pyrroline-5-carboxylate reductase 3	3915.86	0.225467	0.211783	1.06461	0.28705	0.963912
ENSG00000270554	AC069431.2	processed_pseudogene		0.991868	-0.423961	4.57187	-0.0927326	0.926116	0.999962
ENSG00000170276	HSPB2	protein_coding	heat shock protein family B (small) member 2	5121.46	0.182568	0.280659	0.6505	0.51537	0.999962
ENSG00000198892	SHISA4	protein_coding	shisa family member 4	10304.4	0.127216	0.188388	0.675289	0.499492	0.999962
ENSG00000178385	PLEKHM3	protein_coding	pleckstrin homology domain containing M3	756.914	0.206503	0.405429	0.509344	0.610511	0.999962
ENSG00000140836	ZFHX3	protein_coding	zinc finger homeobox 3	637.901	-0.0568059	0.245318	-0.23156	0.81688	0.999962
ENSG00000135148	TRAFD1	protein_coding	TRAF-type zinc finger domain containing 1	3343.63	-0.670259	0.163107	-4.10932	3.96826e-05	0.00177901
ENSG00000168078	PBK	protein_coding	PDZ binding kinase	1510.03	-0.246385	0.605132	-0.407159	0.683891	0.999962
ENSG00000165617	DACT1	protein_coding	dishevelled binding antagonist of beta catenin 1	1235	-0.882895	0.377673	-2.33772	0.0194018	0.196827
ENSG00000117298	ECE1	protein_coding	endothelin converting enzyme 1	7409.43	0.0284939	0.170908	0.16672	0.86759	0.999962
ENSG00000127989	MTERF1	protein_coding	mitochondrial transcription termination factor 1	142.446	-1.02274	0.39687	-2.577	0.00996606	0.111801
ENSG00000258456	PTCD2P1	processed_pseudogene	pentatricopeptide repeat domain 2 pseudogene 1	0.534575	-18.3091	4.64691	-3.94005	8.14637e-05	0.00244958
ENSG00000162972	MAIP1	protein_coding	matrix AAA peptidase interacting protein 1	469.568	0.588973	0.234642	2.51009	0.0120699	0.131979
ENSG00000254535	PABPC4L	protein_coding	poly(A) binding protein cytoplasmic 4 like	0.937909	5.44492	4.59132	1.18592	0.235655	0.944404
ENSG00000169189	NSMCE1	protein_coding	NSE1 homolog, SMC5-SMC6 complex component	2289.91	-0.149958	0.268348	-0.558821	0.576284	0.999962
ENSG00000246662	LINC00535	antisense	long intergenic non-protein coding RNA 535	2.7907	6.57537	4.57535	1.43713	0.150681	0.784129
ENSG00000249853	HS3ST5	protein_coding	heparan sulfate-glucosamine 3-sulfotransferase 5	2.13908	2.96052	4.58696	0.645421	0.518654	0.999962
ENSG00000123643	SLC36A1	protein_coding	solute carrier family 36 member 1	6814.89	-0.0763093	0.266865	-0.285947	0.774919	0.999962
ENSG00000238271	IFNWP19	unprocessed_pseudogene	interferon omega 1 pseudogene 19	7.10994	2.87219	3.64887	0.787145	0.431197	0.999962
ENSG00000110107	PRPF19	protein_coding	pre-mRNA processing factor 19	16561.4	0.0204016	0.173168	0.117814	0.906215	0.999962
ENSG00000280239	AC011498.7	TEC		108.741	0.146566	0.603025	0.243051	0.807966	0.999962
ENSG00000130508	PXDN	protein_coding	peroxidasin	14375.9	-0.260365	0.204695	-1.27197	0.203384	0.899532
ENSG00000167377	ZNF23	protein_coding	zinc finger protein 23	39.2276	0.127145	1.26519	0.100495	0.919951	0.999962
ENSG00000131781	FMO5	protein_coding	flavin containing monooxygenase 5	61.0368	-1.98729	0.861763	-2.30607	0.0211065	0.21129
ENSG00000124549	BTN2A3P	transcribed_unprocessed_pseudogene	butyrophilin subfamily 2 member A3, pseudogene	106.242	-0.334032	0.410743	-0.813238	0.416082	0.999962
ENSG00000140832	MARVELD3	protein_coding	MARVEL domain containing 3	66.9527	3.01773	1.63724	1.84319	0.0653018	0.488446
ENSG00000230098	TCERG1L-AS1	antisense	TCERG1L antisense RNA 1	0.357704	16.7569	4.64638	3.60645	0.000310416	0.00553207
ENSG00000186132	C2orf76	protein_coding	chromosome 2 open reading frame 76	126.226	-0.266244	0.881921	-0.301891	0.762735	0.999962
ENSG00000176678	FOXL1	protein_coding	forkhead box L1	5.02412	3.18713	3.52198	0.904924	0.365506	0.997681
ENSG00000230185	C9orf147	antisense	chromosome 9 open reading frame 147	4.36246	1.23471	4.63643	0.266306	0.790004	0.999962
ENSG00000025423	HSD17B6	protein_coding	hydroxysteroid 17-beta dehydrogenase 6	56.6255	-0.0591116	1.31209	-0.0450513	0.964066	0.999962
ENSG00000143369	ECM1	protein_coding	extracellular matrix protein 1	128785	0.0532023	0.212884	0.249912	0.802656	0.999962
ENSG00000167553	TUBA1C	protein_coding	tubulin alpha 1c	71707.6	0.172792	0.232376	0.743591	0.457124	0.999962
ENSG00000165583	SSX5	protein_coding	SSX family member 5	36.7409	-0.630596	1.22906	-0.513073	0.607901	0.999962
ENSG00000124596	OARD1	protein_coding	O-acyl-ADP-ribose deacylase 1	436.143	-0.127329	0.198053	-0.642901	0.520289	0.999962
ENSG00000136021	SCYL2	protein_coding	SCY1 like pseudokinase 2	794.73	-0.172851	0.438183	-0.394471	0.693233	0.999962
ENSG00000213108	BTF3L4P3	processed_pseudogene	basic transcription factor 3 like 4 pseudogene 3	2.94365	-2.07388	2.81153	-0.737635	0.460736	0.999962
ENSG00000107929	LARP4B	protein_coding	La ribonucleoprotein domain family member 4B	2178.6	-0.00424681	0.307842	-0.0137954	0.988993	0.999962
ENSG00000155974	GRIP1	protein_coding	glutamate receptor interacting protein 1	40.2405	0.409981	1.36375	0.300629	0.763698	0.999962
ENSG00000144649	FAM198A	protein_coding	family with sequence similarity 198 member A	24.6976	-0.566481	1.54632	-0.366341	0.714111	0.999962
ENSG00000242950	ERVW-1	protein_coding	endogenous retrovirus group W member 1, envelope	2.56739	-2.16468	4.52639	-0.478236	0.632482	0.999962
ENSG00000169682	SPNS1	protein_coding	sphingolipid transporter 1 (putative)	32334.3	0.0763359	0.190992	0.399682	0.689391	0.999962
ENSG00000234917	AC098484.2	lincRNA		5.06015	4.54987	3.66789	1.24046	0.214805	0.920172
ENSG00000108604	SMARCD2	protein_coding	SWI/SNF related, matrix associated, actin dependent regulator of chromatin, subfamily d, member 2	20843.1	0.223792	0.221774	1.0091	0.312928	0.985715
ENSG00000169402	RSPH10B2	protein_coding	radial spoke head 10 homolog B2	0.430976	-19.0345	4.64638	-4.09664	4.19198e-05	0.00182763
ENSG00000188092	GPR89B	protein_coding	G protein-coupled receptor 89B	443.814	0.0511105	0.392569	0.130195	0.896412	0.999962
ENSG00000198026	ZNF335	protein_coding	zinc finger protein 335	6506.99	-0.27473	0.258337	-1.06346	0.287574	0.963912
ENSG00000178093	TSSK6	protein_coding	testis specific serine kinase 6	287.201	0.495199	0.54418	0.90999	0.362828	0.997195
ENSG00000124785	NRN1	protein_coding	neuritin 1	6.41385	-5.24359	3.30238	-1.58782	0.112327	0.678863
ENSG00000141469	SLC14A1	protein_coding	solute carrier family 14 member 1 (Kidd blood group)	6.59818	0.719895	4.1128	0.175038	0.86105	0.999962
ENSG00000187134	AKR1C1	protein_coding	aldo-keto reductase family 1 member C1	248.572	1.01313	0.98951	1.02387	0.305895	0.978441
ENSG00000099953	MMP11	protein_coding	matrix metallopeptidase 11	343.121	0.0957557	0.875751	0.109341	0.912932	0.999962
ENSG00000264940	SNORD3C	snoRNA	small nucleolar RNA, C/D box 3C	6.81968	0.307349	0.971727	0.316291	0.751782	0.999962
ENSG00000225174	OSTM1-AS1	lincRNA	OSTM1 antisense RNA 1	0.238469	16.8432	4.64703	3.6245	0.000289519	0.00529469
ENSG00000213225	NOC2LP1	transcribed_processed_pseudogene	NOC2 like nucleolar associated transcriptional repressor pseudogene 1	327.324	0.00475122	0.42952	0.0110617	0.991174	0.999962
ENSG00000272823	AL445423.1	lincRNA		1.97112	-1.3205	4.57752	-0.288476	0.772983	0.999962
ENSG00000185634	SHC4	protein_coding	SHC adaptor protein 4	1247.75	-0.15167	0.238325	-0.636399	0.524517	0.999962
ENSG00000284952	AC104472.3	protein_coding		23.8727	-25.4986	4.59063	-5.55449	2.78421e-08	7.43794e-06
ENSG00000163531	NFASC	protein_coding	neurofascin	344.899	0.785359	0.793542	0.989689	0.322326	0.989184
ENSG00000169188	APEX2	protein_coding	apurinic/apyrimidinic endodeoxyribonuclease 2	7559.72	0.0203894	0.191825	0.106292	0.915351	0.999962
ENSG00000180113	TDRD6	protein_coding	tudor domain containing 6	1.45308	-14.2331	4.67466	-3.04474	0.00232881	0.0302324
ENSG00000238165	AC007560.1	processed_pseudogene		12.6191	0.10041	0.778823	0.128925	0.897417	0.999962
ENSG00000274051	RF02271	misc_RNA		4.91244	-3.15465	1.59822	-1.97385	0.0483993	0.396522
ENSG00000119777	TMEM214	protein_coding	transmembrane protein 214	22643.8	0.119224	0.318942	0.373812	0.708544	0.999962
ENSG00000213684	LDHBP2	processed_pseudogene	lactate dehydrogenase B pseudogene 2	47.1068	-0.265575	1.11294	-0.238625	0.811396	0.999962
ENSG00000245105	A2M-AS1	antisense	A2M antisense RNA 1 (head to head)	28.2329	1.89376	1.12715	1.68014	0.09293	0.609033
ENSG00000201900	RNY1P13	misc_RNA	RNA, Ro-associated Y1 pseudogene 13	0.435137	-4.9838	4.67466	-1.06613	0.286365	0.963912
ENSG00000235173	HGH1	protein_coding	HGH1 homolog	4498.75	-0.173983	0.18956	-0.917829	0.358708	0.996495
ENSG00000233087	RAB6D	protein_coding	RAB6D, member RAS oncogene family	44.4295	1.09172	0.709481	1.53875	0.123865	0.712967
ENSG00000177485	ZBTB33	protein_coding	zinc finger and BTB domain containing 33	669.159	0.173945	0.512129	0.33965	0.73412	0.999962
ENSG00000130714	POMT1	protein_coding	protein O-mannosyltransferase 1	8853.92	0.107225	0.190517	0.56281	0.573564	0.999962
ENSG00000266680	AL135905.1	antisense		54.8162	0.319786	0.572477	0.5586	0.576434	0.999962
ENSG00000198909	MAP3K3	protein_coding	mitogen-activated protein kinase kinase kinase 3	9529.6	-0.0520865	0.263828	-0.197426	0.843494	0.999962
ENSG00000232732	AC097717.1	processed_transcript		0.998104	-2.09928	4.62298	-0.454097	0.649759	0.999962
ENSG00000055813	CCDC85A	protein_coding	coiled-coil domain containing 85A	62.5777	0.554185	0.891058	0.62194	0.533981	0.999962
ENSG00000272263	AC034198.2	antisense		7.73078	4.71231	2.38684	1.97429	0.0483491	0.39623
ENSG00000213239	NPM1P32	processed_pseudogene	nucleophosmin 1 pseudogene 32	1.74812	2.15941	2.59732	0.831401	0.405747	0.999962
ENSG00000105197	TIMM50	protein_coding	translocase of inner mitochondrial membrane 50	25477.6	0.298728	0.202868	1.47252	0.140879	0.761068
ENSG00000275765	AC091982.3	lincRNA		148.287	0.654218	0.519125	1.26023	0.207586	0.906927
ENSG00000226413	OR8T1P	unprocessed_pseudogene	olfactory receptor family 8 subfamily T member 1 pseudogene	2.27587	13.8575	4.65078	2.9796	0.00288629	0.0365807
ENSG00000168743	NPNT	protein_coding	nephronectin	135.132	3.30491	2.43344	1.35812	0.174425	0.841668
ENSG00000270228	AC079880.1	processed_pseudogene		5.83156	-0.332114	1.35878	-0.244421	0.806905	0.999962
ENSG00000157600	TMEM164	protein_coding	transmembrane protein 164	6273.71	-0.229381	0.347284	-0.660499	0.508933	0.999962
ENSG00000164938	TP53INP1	protein_coding	tumor protein p53 inducible nuclear protein 1	1233.11	-0.141033	0.38198	-0.369215	0.711967	0.999962
ENSG00000101144	BMP7	protein_coding	bone morphogenetic protein 7	5.62909	1.21798	4.17285	0.291881	0.770377	0.999962
ENSG00000214366	EIF4EP5	processed_pseudogene	eukaryotic translation initiation factor 4E pseudogene 5	0.794183	0.784021	4.64656	0.168731	0.866008	0.999962
ENSG00000274447	AC005790.1	antisense		26.3953	-0.589775	0.974583	-0.605157	0.545075	0.999962
ENSG00000145423	SFRP2	protein_coding	secreted frizzled related protein 2	63.7196	3.69477	1.85559	1.99116	0.0464632	0.385294
ENSG00000235984	GPC5-AS1	antisense	GPC5 antisense RNA 1	0.423087	0.106116	4.65097	0.0228158	0.981797	0.999962
ENSG00000278700	RF00017	misc_RNA		2.63924	3.3484	3.73859	0.895631	0.37045	0.998273
ENSG00000266160	RN7SL612P	misc_RNA	RNA, 7SL, cytoplasmic 612, pseudogene	0.784936	17.4575	4.64605	3.7575	0.00017162	0.00369097
ENSG00000255121	AP003392.4	lincRNA		378.738	-0.148342	0.41499	-0.35746	0.720747	0.999962
ENSG00000198590	C3orf35	processed_transcript	chromosome 3 open reading frame 35	0.72584	-4.45247	4.67466	-0.95247	0.340859	0.989184
ENSG00000072818	ACAP1	protein_coding	ArfGAP with coiled-coil, ankyrin repeat and PH domains 1	313.772	-0.467953	0.329947	-1.41827	0.156112	0.799606
ENSG00000271303	SRXN1	protein_coding	sulfiredoxin 1	4819.33	0.221808	0.159912	1.38706	0.165424	0.819942
ENSG00000163218	PGLYRP4	protein_coding	peptidoglycan recognition protein 4	1.11294	-5.15016	4.67466	-1.10172	0.270584	0.963912
ENSG00000173933	RBM4	protein_coding	RNA binding motif protein 4	9320.86	0.16906	0.240403	0.703235	0.481909	0.999962
ENSG00000238058	AL355574.1	antisense		3.30992	-29.9935	3.73304	-8.03459	9.38895e-16	4.26399e-12
ENSG00000175984	DENND2C	protein_coding	DENN domain containing 2C	32.3054	-2.12891	1.58996	-1.33897	0.180581	0.853988
ENSG00000099331	MYO9B	protein_coding	myosin IXB	54345.5	-0.174089	0.248312	-0.701089	0.483247	0.999962
ENSG00000099625	CBARP	protein_coding	CACN beta subunit associated regulatory protein	2464.74	-0.103044	0.22776	-0.452424	0.650963	0.999962
ENSG00000154263	ABCA10	protein_coding	ATP binding cassette subfamily A member 10	3.14931	-1.18717	3.64599	-0.325609	0.744721	0.999962
ENSG00000196867	ZFP28	protein_coding	ZFP28 zinc finger protein	83.4081	-0.213687	0.600066	-0.356106	0.721761	0.999962
ENSG00000110811	P3H3	protein_coding	prolyl 3-hydroxylase 3	20441.2	0.328049	0.189531	1.73084	0.0834796	0.570177
ENSG00000157999	ANKRD61	protein_coding	ankyrin repeat domain 61	12.8088	1.34984	1.92211	0.70227	0.482511	0.999962
ENSG00000185499	MUC1	protein_coding	mucin 1, cell surface associated	434.835	0.382148	0.574034	0.665723	0.505588	0.999962
ENSG00000215032	GNL3LP1	processed_pseudogene	G protein nucleolar 3 like pseudogene 1	10.7312	0.296731	1.61483	0.183753	0.854207	0.999962
ENSG00000144152	FBLN7	protein_coding	fibulin 7	608.795	0.621765	0.246754	2.51978	0.0117427	0.128712
ENSG00000279620	AC099494.3	TEC		0.534213	-4.97085	4.67466	-1.06336	0.287619	0.963912
ENSG00000095203	EPB41L4B	protein_coding	erythrocyte membrane protein band 4.1 like 4B	79.863	1.49299	1.29504	1.15285	0.248971	0.949576
ENSG00000244159	RPS27AP13	processed_pseudogene	ribosomal protein S27a pseudogene 13	2.89333	-4.76971	3.25689	-1.4645	0.143058	0.764358
ENSG00000130234	ACE2	protein_coding	angiotensin I converting enzyme 2	9.23323	0.0179776	4.62726	0.00388514	0.9969	0.999962
ENSG00000163956	LRPAP1	protein_coding	LDL receptor related protein associated protein 1	19678.2	-0.122878	0.175224	-0.701264	0.483139	0.999962
ENSG00000142252	GEMIN7	protein_coding	gem nuclear organelle associated protein 7	2702.35	0.0716088	0.192935	0.371156	0.710521	0.999962
ENSG00000226970	AL450063.1	processed_pseudogene		7.93171	0.637364	1.27937	0.498184	0.618354	0.999962
ENSG00000189120	SP6	protein_coding	Sp6 transcription factor	8.97699	1.25072	3.05658	0.409191	0.682399	0.999962
ENSG00000224800	RPS27AP6	processed_pseudogene	ribosomal protein S27a pseudogene 6	1.00975	-19.6858	4.64609	-4.23706	2.26468e-05	0.0013271
ENSG00000213402	PTPRCAP	protein_coding	protein tyrosine phosphatase, receptor type C associated protein	82.0565	2.44494	3.28878	0.743419	0.457228	0.999962
ENSG00000111879	FAM184A	protein_coding	family with sequence similarity 184 member A	1.33436	0.767121	4.62669	0.165803	0.868312	0.999962
ENSG00000139618	BRCA2	protein_coding	BRCA2, DNA repair associated	11.0297	-0.98241	1.24801	-0.787179	0.431177	0.999962
ENSG00000224287	MSL3P1	transcribed_processed_pseudogene	MSL complex subunit 3 pseudogene 1	49.0369	-0.901554	1.56457	-0.576232	0.564459	0.999962
ENSG00000114812	VIPR1	protein_coding	vasoactive intestinal peptide receptor 1	5.18984	10.3568	4.65165	2.22649	0.0259815	0.250964
ENSG00000279878	AP003108.5	TEC		1.25185	-5.59684	4.67466	-1.19727	0.231201	0.940414
ENSG00000165389	SPTSSA	protein_coding	serine palmitoyltransferase small subunit A	3290.04	0.0882536	0.220571	0.400114	0.689072	0.999962
ENSG00000101265	RASSF2	protein_coding	Ras association domain family member 2	194.096	0.443113	0.565842	0.783105	0.433566	0.999962
ENSG00000134698	AGO4	protein_coding	argonaute 4, RISC catalytic component	730.139	0.0661398	0.406651	0.162645	0.870798	0.999962
ENSG00000166788	SAAL1	protein_coding	serum amyloid A like 1	618.458	-0.0283548	0.360276	-0.078703	0.937269	0.999962
ENSG00000145391	SETD7	protein_coding	SET domain containing lysine methyltransferase 7	2063.66	-0.170578	0.40012	-0.426317	0.669877	0.999962
ENSG00000213999	MEF2B	protein_coding	myocyte enhancer factor 2B	93.5705	1.01088	1.40674	0.718599	0.472388	0.999962
ENSG00000174871	CNIH2	protein_coding	cornichon family AMPA receptor auxiliary protein 2	965.367	-0.234435	0.34522	-0.679089	0.497082	0.999962
ENSG00000187474	FPR3	protein_coding	formyl peptide receptor 3	5.46408	12.4177	4.02486	3.08526	0.00203377	0.0268969
ENSG00000230373	GOLGA6L5P	transcribed_unprocessed_pseudogene	golgin A6 family-like 5, pseudogene	3.65692	-1.51061	3.34431	-0.451696	0.651488	0.999962
ENSG00000264578	AC009630.3	antisense		0.251403	-18.6167	4.64732	-4.0059	6.17829e-05	0.00218639
ENSG00000163950	SLBP	protein_coding	stem-loop binding protein	1929.07	-0.175804	0.186386	-0.943226	0.345565	0.989184
ENSG00000272150	NBPF25P	transcribed_unprocessed_pseudogene	NBPF member 25, pseudogene	77.4649	-0.0717525	1.16008	-0.0618514	0.950681	0.999962
ENSG00000139354	GAS2L3	protein_coding	growth arrest specific 2 like 3	854.887	-0.593961	0.562123	-1.05664	0.290677	0.96587
ENSG00000273133	AC116651.1	antisense		2.26378	-2.02501	4.62104	-0.438216	0.66123	0.999962
ENSG00000259917	HNRNPLP2	unprocessed_pseudogene	heterogeneous nuclear ribonucleoprotein L pseudogene 2	1160.66	0.0185718	0.214224	0.0866933	0.930915	0.999962
ENSG00000159023	EPB41	protein_coding	erythrocyte membrane protein band 4.1	270.59	-0.0272329	0.448421	-0.0607307	0.951574	0.999962
ENSG00000106399	RPA3	protein_coding	replication protein A3	904.546	-0.0390571	0.21492	-0.181729	0.855795	0.999962
ENSG00000106692	FKTN	protein_coding	fukutin	194.6	-0.313901	0.800925	-0.391924	0.695115	0.999962
ENSG00000102239	BRS3	protein_coding	bombesin receptor subtype 3	2.93713	-4.53887	4.67466	-0.970951	0.331573	0.989184
ENSG00000155729	KCTD18	protein_coding	potassium channel tetramerization domain containing 18	654.626	0.332807	0.446031	0.746153	0.455575	0.999962
ENSG00000102878	HSF4	protein_coding	heat shock transcription factor 4	3230.14	-0.173747	0.247212	-0.702824	0.482166	0.999962
ENSG00000103449	SALL1	protein_coding	spalt like transcription factor 1	5.79765	19.8391	4.62437	4.29013	1.78569e-05	0.00115821
ENSG00000167434	CA4	protein_coding	carbonic anhydrase 4	2.7917	1.33616	4.61879	0.289288	0.772361	0.999962
ENSG00000240494	RPS12P28	processed_pseudogene	ribosomal protein S12 pseudogene 28	4.46081	25.1692	4.59088	5.48243	4.19517e-08	1.05535e-05
ENSG00000276445	AC005393.1	lincRNA		2.52604	4.06059	3.13243	1.29631	0.194869	0.88152
ENSG00000267493	CIRBP-AS1	antisense	CIRBP antisense RNA 1	199.019	0.550873	0.371408	1.4832	0.138021	0.753246
ENSG00000173950	XXYLT1	protein_coding	xyloside xylosyltransferase 1	3107.99	0.116473	0.209676	0.555491	0.578559	0.999962
ENSG00000224043	CCNT2-AS1	antisense	CCNT2 antisense RNA 1	27.488	0.23051	1.10242	0.209094	0.834375	0.999962
ENSG00000150893	FREM2	protein_coding	FRAS1 related extracellular matrix protein 2	28.1651	-0.0372964	1.55307	-0.0240147	0.980841	0.999962
ENSG00000207067	SNORA72	snoRNA	small nucleolar RNA, H/ACA box 72	1.26165	-17.8861	4.62302	-3.86892	0.000109319	0.0027204
ENSG00000172432	GTPBP2	protein_coding	GTP binding protein 2	9687.58	0.0265162	0.152714	0.173633	0.862154	0.999962
ENSG00000160183	TMPRSS3	protein_coding	transmembrane serine protease 3	12.2355	-0.857772	2.86055	-0.299863	0.764282	0.999962
ENSG00000090372	STRN4	protein_coding	striatin 4	22969.9	0.265248	0.201332	1.31747	0.187683	0.865927
ENSG00000129911	KLF16	protein_coding	Kruppel like factor 16	20278.8	0.250315	0.216139	1.15812	0.246815	0.949576
ENSG00000157399	ARSE	protein_coding	arylsulfatase E (chondrodysplasia punctata 1)	1838.71	-0.204676	0.199035	-1.02834	0.30379	0.977734
ENSG00000140391	TSPAN3	protein_coding	tetraspanin 3	7582.18	0.0510095	0.273888	0.186242	0.852255	0.999962
ENSG00000101544	ADNP2	protein_coding	ADNP homeobox 2	1182.12	-0.768842	0.62661	-1.22699	0.219827	0.928
ENSG00000234807	LINC01135	lincRNA	long intergenic non-protein coding RNA 1135	1.37805	0.0180021	4.67466	0.003851	0.996927	0.999962
ENSG00000065923	SLC9A7	protein_coding	solute carrier family 9 member A7	85.678	2.90931	1.12633	2.58299	0.00979487	0.110179
ENSG00000091592	NLRP1	protein_coding	NLR family pyrin domain containing 1	1503.88	0.103209	0.345764	0.298494	0.765326	0.999962
ENSG00000236507	BX470209.2	lincRNA		0.535237	16.4196	4.6469	3.53344	0.000410185	0.00655166
ENSG00000261732	AL031708.1	protein_coding		73.634	1.02271	1.16046	0.881299	0.378156	0.999059
ENSG00000182983	ZNF662	protein_coding	zinc finger protein 662	14.6992	-0.697398	1.45162	-0.480428	0.630923	0.999962
ENSG00000138617	PARP16	protein_coding	poly(ADP-ribose) polymerase family member 16	539.688	-0.305337	0.331618	-0.920749	0.357182	0.996495
ENSG00000171658	NMRAL2P	transcribed_unprocessed_pseudogene	NmrA like redox sensor 2, pseudogene	28.7244	3.00484	1.1893	2.52657	0.0115182	0.126761
ENSG00000150773	PIH1D2	protein_coding	PIH1 domain containing 2	6.98597	-2.88377	3.31456	-0.87003	0.384284	0.999911
ENSG00000033030	ZCCHC8	protein_coding	zinc finger CCHC-type containing 8	319.033	0.190269	0.311443	0.610926	0.541248	0.999962
ENSG00000154864	PIEZO2	protein_coding	piezo type mechanosensitive ion channel component 2	2.97121	1.15085	4.6329	0.248408	0.803819	0.999962
ENSG00000170275	CRTAP	protein_coding	cartilage associated protein	45428.3	-0.129819	0.220752	-0.588076	0.556481	0.999962
ENSG00000089163	SIRT4	protein_coding	sirtuin 4	167.262	-0.326376	0.513787	-0.635236	0.525274	0.999962
ENSG00000256159	AC022080.3	processed_pseudogene		0.251403	-18.6167	4.64732	-4.0059	6.17829e-05	0.00218639
ENSG00000197180	AC244090.1	lincRNA		512.015	0.255361	0.303854	0.840408	0.40068	0.999962
ENSG00000223804	AC244669.1	transcribed_unprocessed_pseudogene		98.7956	0.143902	0.43666	0.329551	0.741739	0.999962
ENSG00000162733	DDR2	protein_coding	discoidin domain receptor tyrosine kinase 2	1469.25	-0.313584	0.217859	-1.43939	0.150039	0.783069
ENSG00000243491	AC082651.3	lincRNA		1.29008	-10.3508	4.67466	-2.21424	0.0268126	0.257078
ENSG00000106868	SUSD1	protein_coding	sushi domain containing 1	525.82	0.136146	0.305385	0.445818	0.655729	0.999962
ENSG00000280106	AC008555.8	TEC		21.2639	-0.235355	1.88694	-0.124729	0.900738	0.999962
ENSG00000186710	CFAP73	protein_coding	cilia and flagella associated protein 73	33.7698	-1.01387	1.62705	-0.623138	0.533194	0.999962
ENSG00000033170	FUT8	protein_coding	fucosyltransferase 8	465.071	0.054455	0.327615	0.166216	0.867987	0.999962
ENSG00000161328	LRRC56	protein_coding	leucine rich repeat containing 56	183.273	-1.44095	0.838585	-1.71831	0.0857401	0.579017
ENSG00000005022	SLC25A5	protein_coding	solute carrier family 25 member 5	42793.7	-0.151974	0.163517	-0.929407	0.352678	0.994076
ENSG00000255516	AP005436.3	lincRNA		0.40066	-5.33652	4.67466	-1.14158	0.253627	0.949576
ENSG00000266235	MIR3176	miRNA	microRNA 3176	5.7056	-1.46147	1.59241	-0.917772	0.358738	0.996495
ENSG00000277771	RF00017	misc_RNA		0.714925	-4.35871	4.57825	-0.952048	0.341072	0.989184
ENSG00000156427	FGF18	protein_coding	fibroblast growth factor 18	0.534213	-4.97085	4.67466	-1.06336	0.287619	0.963912
ENSG00000227375	DLG1-AS1	antisense	DLG1 antisense RNA 1	1.48608	0.306004	4.56267	0.0670668	0.946529	0.999962
ENSG00000124786	SLC35B3	protein_coding	solute carrier family 35 member B3	711.637	-0.319025	0.306924	-1.03943	0.298606	0.972342
ENSG00000226797	AC005828.1	antisense		0.653369	-18.6308	4.64659	-4.00956	6.08316e-05	0.00218639
ENSG00000151651	ADAM8	protein_coding	ADAM metallopeptidase domain 8	22.0123	1.78308	1.73718	1.02642	0.304692	0.978029
ENSG00000164061	BSN	protein_coding	bassoon presynaptic cytomatrix protein	132.351	-0.114339	0.65984	-0.173282	0.86243	0.999962
ENSG00000162981	FAM84A	protein_coding	family with sequence similarity 84 member A	116.548	3.22629	1.48146	2.17778	0.0294225	0.275588
ENSG00000258938	AL162311.3	antisense		40.5042	-1.88075	1.24894	-1.50588	0.132099	0.73641
ENSG00000198888	MT-ND1	protein_coding	mitochondrially encoded NADH:ubiquinone oxidoreductase core subunit 1	661469	-0.104902	0.222538	-0.471389	0.637363	0.999962
ENSG00000223839	FAM95B1	lincRNA	family with sequence similarity 95 member B1	3.02137	2.02352	2.31669	0.873453	0.382416	0.999911
ENSG00000231758	AC092652.1	antisense		2.56437	2.18144	4.60294	0.473924	0.635554	0.999962
ENSG00000105270	CLIP3	protein_coding	CAP-Gly domain containing linker protein 3	13841.5	-0.426932	0.317796	-1.34342	0.179137	0.852146
ENSG00000179131	AC073335.1	processed_pseudogene		10.1328	0.98979	1.18672	0.834056	0.404249	0.999962
ENSG00000074800	ENO1	protein_coding	enolase 1	300747	0.122235	0.221653	0.551469	0.581312	0.999962
ENSG00000122483	CCDC18	protein_coding	coiled-coil domain containing 18	7.12239	-0.476134	2.65149	-0.179572	0.857488	0.999962
ENSG00000145214	DGKQ	protein_coding	diacylglycerol kinase theta	21989.3	-0.146034	0.206984	-0.705533	0.480478	0.999962
ENSG00000144320	LNPK	protein_coding	lunapark, ER junction formation factor	816.643	0.0281519	0.527044	0.0534147	0.957401	0.999962
ENSG00000134240	HMGCS2	protein_coding	3-hydroxy-3-methylglutaryl-CoA synthase 2	0.441527	17.0267	4.64682	3.66417	0.000248142	0.00479548
ENSG00000259780	AC009065.1	lincRNA		12.2902	-2.93057	1.55257	-1.88756	0.0590855	0.457312
ENSG00000152256	PDK1	protein_coding	pyruvate dehydrogenase kinase 1	175.121	-0.233765	0.585122	-0.399515	0.689514	0.999962
ENSG00000197261	C6orf141	protein_coding	chromosome 6 open reading frame 141	1.77445	-17.3333	4.67466	-3.70794	0.000208956	0.00420831
ENSG00000088280	ASAP3	protein_coding	ArfGAP with SH3 domain, ankyrin repeat and PH domain 3	2749.93	-0.122154	0.260529	-0.468871	0.639162	0.999962
ENSG00000143515	ATP8B2	protein_coding	ATPase phospholipid transporting 8B2	15335.9	-0.281981	0.202585	-1.39191	0.163948	0.816018
ENSG00000215016	RPL24P7	processed_pseudogene	ribosomal protein L24 pseudogene 7	3.60352	0.341685	1.937	0.176399	0.85998	0.999962
ENSG00000049239	H6PD	protein_coding	hexose-6-phosphate dehydrogenase/glucose 1-dehydrogenase	12407	-0.256061	0.248565	-1.03016	0.302936	0.977465
ENSG00000226380	AC016831.1	lincRNA		69.7377	0.164275	0.925959	0.177411	0.859186	0.999962
ENSG00000106733	NMRK1	protein_coding	nicotinamide riboside kinase 1	345.732	-0.108942	0.393677	-0.27673	0.781988	0.999962
ENSG00000232027	AL671986.1	processed_pseudogene		4.08448	3.55916	3.19888	1.11263	0.265868	0.960199
ENSG00000238278	ALG1L6P	unprocessed_pseudogene	asparagine-linked glycosylation 1-like 6, pseudogene	55.7031	0.17155	0.467481	0.366966	0.713644	0.999962
ENSG00000279412	AC020763.3	TEC		115.968	-0.0873692	0.669885	-0.130424	0.896231	0.999962
ENSG00000230756	RHOQP3	processed_pseudogene	ras homolog family member Q pseudogene 3	36.8357	-0.531756	0.776524	-0.684791	0.493476	0.999962
ENSG00000130037	KCNA5	protein_coding	potassium voltage-gated channel subfamily A member 5	119.043	-0.242335	0.806515	-0.300471	0.763818	0.999962
ENSG00000233057	EEF1A1P14	processed_pseudogene	eukaryotic translation elongation factor 1 alpha 1 pseudogene 14	5.96189	1.14378	1.11161	1.02893	0.30351	0.977734
ENSG00000152254	G6PC2	protein_coding	glucose-6-phosphatase catalytic subunit 2	15.7664	17.0648	4.64556	3.67337	0.000239373	0.00469596
ENSG00000126733	DACH2	protein_coding	dachshund family transcription factor 2	8.20321	2.15999	2.66936	0.809177	0.418413	0.999962
ENSG00000260300	AC009119.2	protein_coding		25.9828	-0.847618	1.25767	-0.673961	0.500336	0.999962
ENSG00000269399	AC008764.6	lincRNA		41.2419	0.249396	0.66249	0.376452	0.706581	0.999962
ENSG00000230724	LINC01001	lincRNA	long intergenic non-protein coding RNA 1001	15.6052	-0.320193	3.20706	-0.0998401	0.920471	0.999962
ENSG00000272567	AC109347.2	lincRNA		0.688383	0.107732	4.64242	0.023206	0.981486	0.999962
ENSG00000267361	SEC24AP1	processed_pseudogene	SEC24 homolog A pseudogene 1	0.475766	16.5826	4.64712	3.56835	0.000359233	0.00604617
ENSG00000075643	MOCOS	protein_coding	molybdenum cofactor sulfurase	424.687	-0.163222	0.442589	-0.368789	0.712285	0.999962
ENSG00000236152	MRPS36P1	processed_pseudogene	mitochondrial ribosomal protein S36 pseudogene 1	5.04003	2.29398	2.6025	0.881452	0.378073	0.999059
ENSG00000131165	CHMP1A	protein_coding	charged multivesicular body protein 1A	20014.9	-0.359547	0.277152	-1.2973	0.19453	0.88096
ENSG00000227848	SUCLA2-AS1	antisense	SUCLA2 antisense RNA 1	19.7313	-0.0596727	0.913696	-0.0653091	0.947928	0.999962
ENSG00000179546	HTR1D	protein_coding	5-hydroxytryptamine receptor 1D	2.22101	0.0179992	4.67466	0.00385038	0.996928	0.999962
ENSG00000225588	AC096669.1	lincRNA		7.72499	-29.3597	3.5491	-8.27244	1.31243e-16	7.15249e-13
ENSG00000062524	LTK	protein_coding	leukocyte receptor tyrosine kinase	171.667	-0.540438	0.780774	-0.692183	0.488822	0.999962
ENSG00000273888	FRMD6-AS1	antisense	FRMD6 antisense RNA 1	86.1529	0.281858	0.721836	0.390473	0.696187	0.999962
ENSG00000272264	AC009686.2	lincRNA		4.58875	1.31191	4.64378	0.28251	0.777552	0.999962
ENSG00000089597	GANAB	protein_coding	glucosidase II alpha subunit	91748.6	-0.11252	0.23332	-0.482254	0.629625	0.999962
ENSG00000123364	HOXC13	protein_coding	homeobox C13	71.0635	0.327067	0.694593	0.470876	0.637729	0.999962
ENSG00000253400	AL356133.2	lincRNA		0.577836	-2.80413	4.61056	-0.608198	0.543056	0.999962
ENSG00000058272	PPP1R12A	protein_coding	protein phosphatase 1 regulatory subunit 12A	142.519	0.554721	0.600504	0.923758	0.355612	0.996495
ENSG00000133422	MORC2	protein_coding	MORC family CW-type zinc finger 2	1851.13	-0.306265	0.174251	-1.75761	0.0788138	0.549789
ENSG00000124731	TREM1	protein_coding	triggering receptor expressed on myeloid cells 1	5.58782	-18.0569	4.45901	-4.04952	5.13218e-05	0.00200929
ENSG00000234332	BCAS2P2	processed_pseudogene	BCAS2, pre-mRNA processing factor pseudogene 2	1.34139	17.836	4.64542	3.83947	0.000123299	0.00294977
ENSG00000196951	SCOC-AS1	antisense	SCOC antisense RNA 1	10.4404	-0.610888	1.5584	-0.391996	0.695061	0.999962
ENSG00000133794	ARNTL	protein_coding	aryl hydrocarbon receptor nuclear translocator like	314.749	0.0918287	0.330458	0.277883	0.781102	0.999962
ENSG00000153933	DGKE	protein_coding	diacylglycerol kinase epsilon	127.953	0.198589	0.789904	0.251408	0.801498	0.999962
ENSG00000167978	SRRM2	protein_coding	serine/arginine repetitive matrix 2	11759.6	-0.706645	0.495238	-1.42688	0.153615	0.792615
ENSG00000079387	SENP1	protein_coding	SUMO1/sentrin specific peptidase 1	408.622	0.343897	0.548551	0.626919	0.530712	0.999962
ENSG00000235587	GAPDHP65	processed_pseudogene	glyceraldehyde 3 phosphate dehydrogenase pseudogene 65	39.6611	0.247035	0.617229	0.400232	0.688985	0.999962
ENSG00000230662	TNPO1P2	processed_pseudogene	transportin 1 pseudogene 2	4.94834	-0.373135	1.89781	-0.196614	0.84413	0.999962
ENSG00000070950	RAD18	protein_coding	RAD18, E3 ubiquitin protein ligase	240.158	-0.0157469	0.812365	-0.0193841	0.984535	0.999962
ENSG00000150712	MTMR12	protein_coding	myotubularin related protein 12	1069.4	-0.0475209	0.417805	-0.113739	0.909444	0.999962
ENSG00000185885	IFITM1	protein_coding	interferon induced transmembrane protein 1	529.379	0.316255	0.492111	0.642649	0.520452	0.999962
ENSG00000257279	AC127164.1	antisense		1.14991	0.0105369	4.61352	0.00228392	0.998178	0.999962
ENSG00000250220	AC053527.1	antisense		2.66676	4.17408	4.54121	0.919156	0.358014	0.996495
ENSG00000277986	RF00015	snRNA		5.20857	2.39028	1.5977	1.49608	0.134633	0.743358
ENSG00000251660	AC007036.3	sense_overlapping		33.5526	-0.790425	0.794918	-0.994348	0.320053	0.989184
ENSG00000116977	LGALS8	protein_coding	galectin 8	639.175	-0.666589	0.535142	-1.24563	0.2129	0.917203
ENSG00000119669	IRF2BPL	protein_coding	interferon regulatory factor 2 binding protein like	16509.9	-0.0548716	0.163774	-0.335045	0.737591	0.999962
ENSG00000120820	GLT8D2	protein_coding	glycosyltransferase 8 domain containing 2	11.7509	-0.519642	2.32769	-0.223244	0.823346	0.999962
ENSG00000253632	AC084026.2	lincRNA		1.04757	-1.84157	4.63767	-0.397089	0.691302	0.999962
ENSG00000248449	PCDHGB8P	transcribed_unitary_pseudogene	protocadherin gamma subfamily B, 8 pseudogene	9.51955	-2.20515	2.00827	-1.09804	0.272188	0.963912
ENSG00000170417	TMEM182	protein_coding	transmembrane protein 182	162.495	0.227515	0.565725	0.402165	0.687562	0.999962
ENSG00000173599	PC	protein_coding	pyruvate carboxylase	20901	-0.00685925	0.259772	-0.0264049	0.978934	0.999962
ENSG00000214110	LDHAP4	processed_pseudogene	lactate dehydrogenase A pseudogene 4	184.675	0.577955	0.513757	1.12496	0.260607	0.957452
ENSG00000268108	AC008687.2	antisense		6.67024	1.0967	2.79363	0.392573	0.694635	0.999962
ENSG00000250441	AC109481.1	processed_pseudogene		1.07912	-18.146	4.63846	-3.91208	9.15064e-05	0.00249846
ENSG00000228672	PROB1	protein_coding	proline rich basic protein 1	929.134	0.145602	0.320958	0.45365	0.650081	0.999962
ENSG00000178988	MRFAP1L1	protein_coding	Morf4 family associated protein 1 like 1	1681.16	0.114853	0.284016	0.404389	0.685927	0.999962
ENSG00000164934	DCAF13	protein_coding	DDB1 and CUL4 associated factor 13	625.049	-0.402082	0.42759	-0.940344	0.347041	0.990423
ENSG00000228451	SDAD1P1	transcribed_processed_pseudogene	SDA1 domain containing 1 pseudogene 1	6.73514	1.63225	3.41023	0.478633	0.6322	0.999962
ENSG00000163395	IGFN1	protein_coding	immunoglobulin-like and fibronectin type III domain containing 1	0.469924	-17.9627	4.64769	-3.86487	0.000111149	0.0027409
ENSG00000141756	FKBP10	protein_coding	FK506 binding protein 10	46906.6	-0.410263	0.319576	-1.28377	0.199222	0.889349
ENSG00000253438	PCAT1	antisense	prostate cancer associated transcript 1 (non-protein coding)	2.25886	-7.15601	4.58928	-1.55929	0.118928	0.696926
ENSG00000270074	AC087203.3	lincRNA		16.392	0.86113	0.808973	1.06447	0.287114	0.963912
ENSG00000185883	ATP6V0C	protein_coding	ATPase H+ transporting V0 subunit c	147416	0.00562816	0.24777	0.0227153	0.981877	0.999962
ENSG00000166881	NEMP1	protein_coding	nuclear envelope integral membrane protein 1	1873.98	-0.332779	0.465177	-0.715382	0.474373	0.999962
ENSG00000239195	SNORD5	snoRNA	small nucleolar RNA, C/D box 5	1.714	0.787091	2.8061	0.280493	0.779099	0.999962
ENSG00000178115	GOLGA8Q	protein_coding	golgin A8 family member Q	0.948063	2.92978	3.57622	0.819239	0.41265	0.999962
ENSG00000004660	CAMKK1	protein_coding	calcium/calmodulin dependent protein kinase kinase 1	867.696	0.172416	0.226706	0.760526	0.44694	0.999962
ENSG00000053254	FOXN3	protein_coding	forkhead box N3	1474.98	-0.205648	0.354648	-0.579866	0.562005	0.999962
ENSG00000134717	BTF3L4	protein_coding	basic transcription factor 3 like 4	888.15	0.0382724	0.306418	0.124903	0.900601	0.999962
ENSG00000107736	CDH23	protein_coding	cadherin related 23	7.99015	2.47269	2.30635	1.07212	0.283664	0.963912
ENSG00000172247	C1QTNF4	protein_coding	C1q and TNF related 4	83.8907	-0.60693	1.32414	-0.458358	0.646695	0.999962
ENSG00000103335	PIEZO1	protein_coding	piezo type mechanosensitive ion channel component 1	80802.7	0.018283	0.258834	0.0706358	0.943688	0.999962
ENSG00000177694	NAALADL2	protein_coding	N-acetylated alpha-linked acidic dipeptidase like 2	44.7906	-0.872259	1.29959	-0.67118	0.502106	0.999962
ENSG00000285018	AC245140.3	antisense		9.29182	5.18055	2.37315	2.18299	0.0290368	0.273401
ENSG00000213252	AP001282.1	processed_pseudogene		3.38526	-4.52583	3.01436	-1.50143	0.133246	0.740981
ENSG00000271787	AC104794.4	antisense		4.48711	-2.13633	4.53943	-0.470616	0.637915	0.999962
ENSG00000151388	ADAMTS12	protein_coding	ADAM metallopeptidase with thrombospondin type 1 motif 12	21.5665	5.50142	2.35054	2.34049	0.0192584	0.195592
ENSG00000163393	SLC22A15	protein_coding	solute carrier family 22 member 15	191.516	-0.92407	0.711581	-1.29861	0.194076	0.879866
ENSG00000115718	PROC	protein_coding	protein C, inactivator of coagulation factors Va and VIIIa	1.16119	-4.1141	4.67466	-0.880086	0.378813	0.999059
ENSG00000139180	NDUFA9	protein_coding	NADH:ubiquinone oxidoreductase subunit A9	5789.18	-0.0586912	0.220609	-0.266041	0.790207	0.999962
ENSG00000181649	PHLDA2	protein_coding	pleckstrin homology like domain family A member 2	12560.1	1.6122	1.65474	0.97429	0.329913	0.989184
ENSG00000114767	RRP9	protein_coding	ribosomal RNA processing 9, U3 small nucleolar RNA binding protein	8099.68	0.193583	0.213468	0.906849	0.364487	0.997681
ENSG00000108468	CBX1	protein_coding	chromobox 1	2285.83	-0.141482	0.299974	-0.471647	0.637179	0.999962
ENSG00000271816	BMS1P4	processed_transcript	BMS1, ribosome biogenesis factor pseudogene 4	7.43326	-1.7376	2.89174	-0.600884	0.547917	0.999962
ENSG00000252712	SCARNA14	scaRNA	small Cajal body-specific RNA 14	0.541682	-19.1041	4.64886	-4.10941	3.96671e-05	0.00177901
ENSG00000106397	PLOD3	protein_coding	procollagen-lysine,2-oxoglutarate 5-dioxygenase 3	152606	0.0748517	0.194857	0.384137	0.700877	0.999962
ENSG00000272359	RNU4-89P	snRNA	RNA, U4 small nuclear 89, pseudogene	1.27459	-0.869436	4.5884	-0.189486	0.849712	0.999962
ENSG00000129351	ILF3	protein_coding	interleukin enhancer binding factor 3	35349.2	0.00805312	0.274107	0.0293795	0.976562	0.999962
ENSG00000239614	HMGN1P7	processed_pseudogene	high mobility group nucleosome binding domain 1 pseudogene 7	1.8944	-0.747456	4.67113	-0.160016	0.872869	0.999962
ENSG00000182362	YBEY	protein_coding	ybeY metallopeptidase (putative)	569.682	-0.363296	0.281248	-1.29173	0.196452	0.882771
ENSG00000110931	CAMKK2	protein_coding	calcium/calmodulin dependent protein kinase kinase 2	5404.07	-0.0620849	0.191633	-0.323977	0.745955	0.999962
ENSG00000075035	WSCD2	protein_coding	WSC domain containing 2	61.5293	5.43392	1.8187	2.98781	0.00280987	0.0357285
ENSG00000040933	INPP4A	protein_coding	inositol polyphosphate-4-phosphatase type I A	858.652	-0.0339319	0.223555	-0.151783	0.879358	0.999962
ENSG00000119866	BCL11A	protein_coding	B cell CLL/lymphoma 11A	113.839	0.566093	0.677042	0.836126	0.403084	0.999962
ENSG00000183765	CHEK2	protein_coding	checkpoint kinase 2	477.585	-0.0145259	0.360652	-0.0402768	0.967872	0.999962
ENSG00000137834	SMAD6	protein_coding	SMAD family member 6	1102.85	-0.210657	0.230126	-0.915398	0.359983	0.997195
ENSG00000260454	AL355607.2	lincRNA		1.12835	17.7223	4.64576	3.81474	0.000136329	0.00311011
ENSG00000129221	AIPL1	protein_coding	aryl hydrocarbon receptor interacting protein like 1	1.01088	0.0180098	4.67466	0.00385265	0.996926	0.999962
ENSG00000110881	ASIC1	protein_coding	acid sensing ion channel subunit 1	1177.72	-0.27999	0.290735	-0.963042	0.335526	0.989184
ENSG00000148343	MIGA2	protein_coding	mitoguardin 2	6608.52	-0.0482884	0.209009	-0.231036	0.817287	0.999962
ENSG00000164051	CCDC51	protein_coding	coiled-coil domain containing 51	2198.44	-0.241925	0.366535	-0.660034	0.509232	0.999962
ENSG00000124557	BTN1A1	protein_coding	butyrophilin subfamily 1 member A1	5.21021	-0.702647	4.1642	-0.168735	0.866005	0.999962
ENSG00000025039	RRAGD	protein_coding	Ras related GTP binding D	6774.04	-0.0140473	0.292297	-0.0480583	0.96167	0.999962
ENSG00000118246	FASTKD2	protein_coding	FAST kinase domains 2	696.854	-0.17019	0.492374	-0.345651	0.729605	0.999962
ENSG00000263647	BPTFP1	unprocessed_pseudogene	bromodomain PHD finger transcription factor pseudogene 1	3.83678	1.60472	4.60337	0.348596	0.727392	0.999962
ENSG00000239040	RF00019	misc_RNA		0.521599	-17.9655	4.62817	-3.88177	0.000103697	0.00260909
ENSG00000221410	MIR1238	miRNA	microRNA 1238	1.71108	0.198192	1.58533	0.125017	0.90051	0.999962
ENSG00000251819	RNU6-322P	snRNA	RNA, U6 small nuclear 322, pseudogene	1.71507	-0.315182	3.20982	-0.098193	0.921779	0.999962
ENSG00000197956	S100A6	protein_coding	S100 calcium binding protein A6	83383.6	0.56146	0.243663	2.30425	0.0212087	0.212001
ENSG00000235872	AC078777.1	antisense		1.20526	14.137	4.64837	3.04128	0.00235577	0.0304808
ENSG00000243554	AC004967.1	transcribed_unprocessed_pseudogene		20.8658	-0.690746	1.49517	-0.461984	0.644093	0.999962
ENSG00000277887	SNORA50C	snoRNA	small nucleolar RNA, H/ACA box 50C	5.92028	-0.635167	2.10104	-0.302311	0.762415	0.999962
ENSG00000158516	CPA2	protein_coding	carboxypeptidase A2	139.14	1.09424	0.745763	1.46728	0.142301	0.763749
ENSG00000229230	MT1P3	processed_pseudogene	metallothionein 1 pseudogene 3	0.911631	-16.7842	4.64364	-3.61445	0.000300986	0.00545681
ENSG00000279691	AC113410.3	TEC		1.00438	-2.60451	4.61421	-0.564454	0.572445	0.999962
ENSG00000002745	WNT16	protein_coding	Wnt family member 16	1.40315	0.111261	4.62525	0.0240552	0.980809	0.999962
ENSG00000253250	C8orf88	protein_coding	chromosome 8 open reading frame 88	214.728	-0.586552	0.54468	-1.07687	0.281537	0.963912
ENSG00000213413	PVRIG	protein_coding	PVR related immunoglobulin domain containing	3.81213	-18.8585	4.59771	-4.10171	4.10102e-05	0.00181951
ENSG00000180628	PCGF5	protein_coding	polycomb group ring finger 5	1177.03	0.103258	0.206451	0.500156	0.616965	0.999962
ENSG00000160714	UBE2Q1	protein_coding	ubiquitin conjugating enzyme E2 Q1	4416.16	-0.120705	0.134185	-0.899535	0.368368	0.997681
ENSG00000206190	ATP10A	protein_coding	ATPase phospholipid transporting 10A (putative)	22585.3	0.120448	0.17543	0.686588	0.492342	0.999962
ENSG00000214558	AL365217.1	processed_pseudogene		35.3586	0.942671	0.850807	1.10797	0.267873	0.961377
ENSG00000228328	AL158201.1	processed_pseudogene		8.78973	0.471331	1.2222	0.385641	0.699763	0.999962
ENSG00000137648	TMPRSS4	protein_coding	transmembrane serine protease 4	0.837096	-13.8797	4.67466	-2.96913	0.00298647	0.03771
ENSG00000225869	AC008696.1	processed_pseudogene		2.21268	0.30632	2.81041	0.108995	0.913207	0.999962
ENSG00000249641	HOXC13-AS	antisense	HOXC13 antisense RNA	3.61099	1.50402	4.62096	0.325478	0.744819	0.999962
ENSG00000186714	CCDC73	protein_coding	coiled-coil domain containing 73	3.15441	17.4187	4.59672	3.78937	0.000151031	0.00335133
ENSG00000265936	AC091042.1	processed_pseudogene		7.75044	1.06869	1.3087	0.816604	0.414155	0.999962
ENSG00000148057	IDNK	protein_coding	IDNK, gluconokinase	90.8134	-0.8886	0.526796	-1.6868	0.0916419	0.604052
ENSG00000229512	AC068580.1	sense_intronic		66.4219	-0.218085	0.62831	-0.347098	0.728517	0.999962
ENSG00000251593	MSNP1	processed_pseudogene	moesin pseudogene 1	381.35	-0.222043	0.347311	-0.639321	0.522614	0.999962
ENSG00000258588	TRIM6-TRIM34	protein_coding	TRIM6-TRIM34 readthrough	51.0534	-0.563574	1.62975	-0.345805	0.729489	0.999962
ENSG00000224818	AC096677.2	3prime_overlapping_ncRNA		34.3608	0.321416	2.43414	0.132045	0.894949	0.999962
ENSG00000182180	MRPS16	protein_coding	mitochondrial ribosomal protein S16	5085.73	-0.340096	0.390299	-0.871372	0.383551	0.999911
ENSG00000179219	LINC00311	lincRNA	long intergenic non-protein coding RNA 311	1.24889	2.70774	4.60395	0.588134	0.556443	0.999962
ENSG00000164434	FABP7	protein_coding	fatty acid binding protein 7	91.6583	0.59255	1.47624	0.401392	0.688132	0.999962
ENSG00000171960	PPIH	protein_coding	peptidylprolyl isomerase H	1320.95	0.141058	0.17552	0.803657	0.421595	0.999962
ENSG00000270433	H3F3AP2	transcribed_unprocessed_pseudogene	H3 histone family member 3A pseudogene 2	2.361	-16.6095	4.65456	-3.56845	0.000359102	0.00604617
ENSG00000279129	AC046158.3	TEC		0.57231	-17.1232	4.62939	-3.6988	0.000216625	0.00434031
ENSG00000170779	CDCA4	protein_coding	cell division cycle associated 4	6572.03	0.215324	0.185105	1.16325	0.244729	0.949576
ENSG00000262251	AC087388.1	sense_intronic		30.605	-0.941221	0.984843	-0.955706	0.339221	0.989184
ENSG00000227376	FTH1P16	processed_pseudogene	ferritin heavy chain 1 pseudogene 16	26.8783	0.0942312	0.595537	0.158229	0.874276	0.999962
ENSG00000186625	KATNA1	protein_coding	katanin catalytic subunit A1	362.442	0.0975546	0.461059	0.211588	0.832428	0.999962
ENSG00000166387	PPFIBP2	protein_coding	PPFIA binding protein 2	863.352	0.0889148	0.355255	0.250285	0.802367	0.999962
ENSG00000273257	AC069200.1	lincRNA		1.32082	-0.542448	4.58151	-0.118399	0.905751	0.999962
ENSG00000158769	F11R	protein_coding	F11 receptor	7893.05	0.163769	0.556224	0.29443	0.768429	0.999962
ENSG00000221468	RNU6ATAC11P	snRNA	RNA, U6atac small nuclear 11, pseudogene	0.939849	-18.5383	4.64639	-3.98983	6.61207e-05	0.00225786
ENSG00000224329	LINC00297	lincRNA	long intergenic non-protein coding RNA 297	0.664116	16.1994	4.62374	3.50353	0.000459137	0.00720109
ENSG00000182264	IZUMO1	protein_coding	izumo sperm-egg fusion 1	0.830947	0.10731	4.64434	0.0231056	0.981566	0.999962
ENSG00000213621	RPSAP54	processed_pseudogene	ribosomal protein SA pseudogene 54	363.183	0.0777903	0.322028	0.241564	0.809118	0.999962
ENSG00000240291	AL450384.2	antisense		1.81384	-13.9989	4.67466	-2.99464	0.00274766	0.0350028
ENSG00000100445	SDR39U1	protein_coding	short chain dehydrogenase/reductase family 39U member 1	2503.61	-0.214731	0.238023	-0.902144	0.36698	0.997681
ENSG00000119139	TJP2	protein_coding	tight junction protein 2	1303.98	-0.0516994	0.278092	-0.185908	0.852517	0.999962
ENSG00000172399	MYOZ2	protein_coding	myozenin 2	0.813036	0.109854	4.63195	0.0237166	0.981079	0.999962
ENSG00000167646	DNAAF3	protein_coding	dynein axonemal assembly factor 3	1241.61	0.0167374	0.319391	0.0524041	0.958207	0.999962
ENSG00000223529	EEF1A1P8	processed_pseudogene	eukaryotic translation elongation factor 1 alpha 1 pseudogene 8	3.72865	1.16659	1.43545	0.812697	0.416392	0.999962
ENSG00000132182	NUP210	protein_coding	nucleoporin 210	106.944	-1.15286	1.0152	-1.1356	0.256125	0.952394
ENSG00000126787	DLGAP5	protein_coding	DLG associated protein 5	126.155	-0.195158	1.19882	-0.162792	0.870683	0.999962
ENSG00000156521	TYSND1	protein_coding	trypsin domain containing 1	8832.12	0.574565	0.216905	2.64892	0.00807489	0.0926843
ENSG00000172081	MOB3A	protein_coding	MOB kinase activator 3A	11959.9	0.0632183	0.222566	0.284043	0.776378	0.999962
ENSG00000112319	EYA4	protein_coding	EYA transcriptional coactivator and phosphatase 4	11.8527	4.52246	2.70403	1.67249	0.0944279	0.61395
ENSG00000159714	ZDHHC1	protein_coding	zinc finger DHHC-type containing 1	8434.71	0.119887	0.238968	0.501687	0.615888	0.999962
ENSG00000169548	ZNF280A	protein_coding	zinc finger protein 280A	2.94149	-5.50733	4.58948	-1.19999	0.230143	0.939954
ENSG00000089280	FUS	protein_coding	FUS RNA binding protein	28754.7	0.325153	0.137191	2.37007	0.0177845	0.182665
ENSG00000006757	PNPLA4	protein_coding	patatin like phospholipase domain containing 4	802.386	0.163289	0.204057	0.800216	0.423586	0.999962
ENSG00000177034	MTX3	protein_coding	metaxin 3	210.864	-0.415988	0.568537	-0.731682	0.464363	0.999962
ENSG00000235095	AC099654.2	unprocessed_pseudogene		0.334721	-5.06444	4.67466	-1.08338	0.278639	0.963912
ENSG00000275126	HIST1H4L	protein_coding	histone cluster 1 H4 family member l	4.43433	5.39853	4.33928	1.24411	0.21346	0.917729
ENSG00000158008	EXTL1	protein_coding	exostosin like glycosyltransferase 1	9288.16	0.260962	0.324619	0.803901	0.421454	0.999962
ENSG00000146950	SHROOM2	protein_coding	shroom family member 2	2219.76	-0.208162	0.264028	-0.788411	0.430456	0.999962
ENSG00000240449	AC005586.1	antisense		39.6353	0.151711	0.498481	0.304347	0.760863	0.999962
ENSG00000185201	IFITM2	protein_coding	interferon induced transmembrane protein 2	6974.48	0.0870447	0.201004	0.433051	0.664978	0.999962
ENSG00000128310	GALR3	protein_coding	galanin receptor 3	1.07037	-24.4763	4.59491	-5.32683	9.99408e-08	1.9592e-05
ENSG00000213923	CSNK1E	protein_coding	casein kinase 1 epsilon	24901.2	-0.0604966	0.1524	-0.39696	0.691397	0.999962
ENSG00000140368	PSTPIP1	protein_coding	proline-serine-threonine phosphatase interacting protein 1	6.78417	-1.71561	4.47766	-0.383148	0.70161	0.999962
ENSG00000279672	AP006621.5	TEC		51.3021	-0.82766	0.80384	-1.02963	0.303182	0.977577
ENSG00000197976	AKAP17A	protein_coding	A-kinase anchoring protein 17A	1350.12	0.017167	0.169231	0.101441	0.9192	0.999962
ENSG00000096717	SIRT1	protein_coding	sirtuin 1	569.993	0.369304	0.69663	0.53013	0.596022	0.999962
ENSG00000196371	FUT4	protein_coding	fucosyltransferase 4	922.08	0.191143	0.195613	0.977149	0.328496	0.989184
ENSG00000180198	RCC1	protein_coding	regulator of chromosome condensation 1	3156.96	-0.213348	0.23575	-0.904975	0.365479	0.997681
ENSG00000101695	RNF125	protein_coding	ring finger protein 125	225.185	0.531826	0.550204	0.966598	0.333745	0.989184
ENSG00000248734	AC008906.1	antisense		8.03253	-2.6456	2.16025	-1.22467	0.220699	0.928821
ENSG00000265293	ARGFXP2	processed_pseudogene	arginine-fifty homeobox pseudogene 2	1.25048	-3.10169	4.58138	-0.677021	0.498393	0.999962
ENSG00000189298	ZKSCAN3	protein_coding	zinc finger with KRAB and SCAN domains 3	264.8	-0.332986	0.390541	-0.852629	0.393865	0.999962
ENSG00000126785	RHOJ	protein_coding	ras homolog family member J	487.403	-0.198849	0.271693	-0.731889	0.464236	0.999962
ENSG00000229020	AKR7A2P1	processed_pseudogene	aldo-keto reductase family 7 member A2 pseudogene 1	1.05163	-5.39167	4.58689	-1.17545	0.239813	0.947466
ENSG00000209042	SNORD12C	snoRNA	small nucleolar RNA, C/D box 12C	2.92154	-0.746505	1.90361	-0.392152	0.694946	0.999962
ENSG00000259869	AL022344.2	lincRNA		2.18132	12.7956	4.6503	2.75156	0.00593128	0.0698148
ENSG00000188959	C9orf152	protein_coding	chromosome 9 open reading frame 152	2.0033	-5.3182	4.67466	-1.13766	0.255261	0.951843
ENSG00000122417	ODF2L	protein_coding	outer dense fiber of sperm tails 2 like	169.292	0.144939	0.335651	0.431815	0.665876	0.999962
ENSG00000172543	CTSW	protein_coding	cathepsin W	5.34619	-0.259712	3.26889	-0.0794495	0.936675	0.999962
ENSG00000261665	TUBAP4	transcribed_processed_pseudogene	tubulin alpha pseudogene 4	0.931405	0.0180174	4.67466	0.00385426	0.996925	0.999962
ENSG00000132434	LANCL2	protein_coding	LanC like 2	1286.84	-0.288937	0.294601	-0.980774	0.326704	0.989184
ENSG00000125354	SEPT6	protein_coding	septin 6	1054.29	-0.125982	0.172056	-0.732215	0.464037	0.999962
ENSG00000101577	LPIN2	protein_coding	lipin 2	1080.32	0.00363601	0.321242	0.0113186	0.990969	0.999962
ENSG00000077235	GTF3C1	protein_coding	general transcription factor IIIC subunit 1	18663.9	-0.175786	0.253265	-0.69408	0.487632	0.999962
ENSG00000064547	LPAR2	protein_coding	lysophosphatidic acid receptor 2	586.554	0.0189072	0.284725	0.066405	0.947055	0.999962
ENSG00000072135	PTPN18	protein_coding	protein tyrosine phosphatase, non-receptor type 18	8584.78	-0.108022	0.280545	-0.385042	0.700206	0.999962
ENSG00000254884	PRR13P2	processed_pseudogene	proline rich 13 pseudogene 2	0.636391	-16.964	4.65301	-3.64581	0.000266548	0.00503687
ENSG00000254400	AC091564.2	antisense		1.83725	-0.86235	2.18012	-0.395553	0.692435	0.999962
ENSG00000155660	PDIA4	protein_coding	protein disulfide isomerase family A member 4	11002.2	0.0890622	0.19727	0.451473	0.651648	0.999962
ENSG00000177380	PPFIA3	protein_coding	PTPRF interacting protein alpha 3	6406.7	0.161891	0.215668	0.750648	0.452864	0.999962
ENSG00000139641	ESYT1	protein_coding	extended synaptotagmin 1	42048.4	0.00894466	0.212078	0.0421763	0.966358	0.999962
ENSG00000251432	AC108062.1	lincRNA		7.91964	0.56443	2.03478	0.277391	0.78148	0.999962
ENSG00000117461	PIK3R3	protein_coding	phosphoinositide-3-kinase regulatory subunit 3	578.63	-0.0767259	0.306491	-0.250337	0.802327	0.999962
ENSG00000133328	HRASLS2	protein_coding	HRAS like suppressor 2	2.64964	3.67168	4.59236	0.799518	0.42399	0.999962
ENSG00000214787	MS4A4E	protein_coding	membrane spanning 4-domains A4E	0.623249	-4.92831	4.67466	-1.05426	0.291764	0.966536
ENSG00000152284	TCF7L1	protein_coding	transcription factor 7 like 1	3455.03	-0.228509	0.194307	-1.17602	0.239587	0.947301
ENSG00000028277	POU2F2	protein_coding	POU class 2 homeobox 2	19.1257	1.60565	1.87492	0.856382	0.391786	0.999962
ENSG00000242516	LINC00960	lincRNA	long intergenic non-protein coding RNA 960	15.1335	0.635391	2.22475	0.2856	0.775184	0.999962
ENSG00000167476	JSRP1	protein_coding	junctional sarcoplasmic reticulum protein 1	232.463	-0.639323	0.493677	-1.29502	0.195312	0.88152
ENSG00000240654	C1QTNF9	protein_coding	C1q and TNF related 9	1.46224	-23.6896	4.61841	-5.12938	2.90696e-07	4.47525e-05
ENSG00000189283	FHIT	protein_coding	fragile histidine triad	470.177	-0.227166	0.391153	-0.580759	0.561403	0.999962
ENSG00000234369	TATDN1P1	processed_pseudogene	TatD DNase domain containing 1 pseudogene 1	2.014	8.16095	4.576	1.78342	0.0745175	0.531011
ENSG00000254939	AP003038.1	processed_pseudogene		0.444772	17.4795	4.64768	3.76091	0.000169297	0.00365255
ENSG00000251667	BRCC3P1	processed_pseudogene	BRCA1/BRCA2-containing complex subunit 3 pseudogene 1	2.51881	-1.1583	4.56557	-0.253703	0.799725	0.999962
ENSG00000184678	HIST2H2BE	protein_coding	histone cluster 2 H2B family member e	958.613	0.202833	0.2913	0.696303	0.486239	0.999962
ENSG00000231535	LINC00278	lincRNA	long intergenic non-protein coding RNA 278	7.57131	-8.08334	3.6573	-2.21019	0.0270919	0.259209
ENSG00000271576	AL359504.2	lincRNA		37.7467	-1.3592	1.16487	-1.16683	0.243279	0.949576
ENSG00000118873	RAB3GAP2	protein_coding	RAB3 GTPase activating non-catalytic protein subunit 2	582.787	0.359138	0.789123	0.45511	0.64903	0.999962
ENSG00000115232	ITGA4	protein_coding	integrin subunit alpha 4	110.356	-0.450488	1.06663	-0.422346	0.672772	0.999962
ENSG00000128683	GAD1	protein_coding	glutamate decarboxylase 1	29.4163	1.17779	1.63203	0.721671	0.470497	0.999962
ENSG00000268070	AC006539.2	processed_pseudogene		0.390767	0.0180192	4.67466	0.00385466	0.996924	0.999962
ENSG00000116459	ATP5PB	protein_coding	ATP synthase peripheral stalk-membrane subunit b	3668.9	0.0729537	0.30264	0.241058	0.80951	0.999962
ENSG00000258695	AC005225.3	antisense		0.701314	-24.7841	4.62768	-5.35562	8.52612e-08	1.801e-05
ENSG00000169347	GP2	protein_coding	glycoprotein 2	22.0106	22.5845	2.98796	7.55851	4.07699e-14	1.11094e-10
ENSG00000233963	ATP8A2P3	unprocessed_pseudogene	ATPase phospholipid transporting 8A2 pseudogene 3	0.66926	0.0180181	4.67466	0.00385443	0.996925	0.999962
ENSG00000234676	IFT74-AS1	antisense	IFT74 antisense RNA 1	0.489696	-4.98877	4.67466	-1.06719	0.285885	0.963912
ENSG00000258681	AL355836.1	processed_pseudogene		0.712766	-19.1154	4.64647	-4.11395	3.88951e-05	0.00177554
ENSG00000085760	MTIF2	protein_coding	mitochondrial translational initiation factor 2	237.083	0.300775	0.598459	0.502582	0.615258	0.999962
ENSG00000178723	GLULP4	processed_pseudogene	glutamate-ammonia ligase pseudogene 4	7.43048	0.985391	1.27263	0.774295	0.438756	0.999962
ENSG00000232504	ST3GAL5-AS1	lincRNA	ST3GAL5 antisense RNA 1 (head to head)	13.103	0.403297	1.65643	0.243474	0.807639	0.999962
ENSG00000133619	KRBA1	protein_coding	KRAB-A domain containing 1	4453.25	-0.0758222	0.206762	-0.366713	0.713833	0.999962
ENSG00000140943	MBTPS1	protein_coding	membrane bound transcription factor peptidase, site 1	7555.58	0.107535	0.166777	0.644786	0.519066	0.999962
ENSG00000132204	LINC00470	lincRNA	long intergenic non-protein coding RNA 470	15.3771	2.25622	2.07648	1.08656	0.27723	0.963912
ENSG00000099977	DDT	protein_coding	D-dopachrome tautomerase	1616.2	4.99919	2.02044	2.47431	0.0133494	0.143277
ENSG00000273295	AP000350.6	lincRNA		9.80056	1.56472	1.46293	1.06958	0.284808	0.963912
ENSG00000266392	MIR4740	miRNA	microRNA 4740	13.9167	0.505975	0.789336	0.641013	0.521514	0.999962
ENSG00000081138	CDH7	protein_coding	cadherin 7	32.2829	-2.86516	1.86519	-1.53612	0.124508	0.714861
ENSG00000259343	TMC3-AS1	antisense	TMC3 antisense RNA 1	113.627	0.141523	0.585312	0.241791	0.808942	0.999962
ENSG00000240761	AC098831.1	processed_pseudogene		1.33832	0.622828	4.38545	0.142022	0.887063	0.999962
ENSG00000070366	SMG6	protein_coding	SMG6, nonsense mediated mRNA decay factor	5371.52	-0.147996	0.211543	-0.699603	0.484176	0.999962
ENSG00000236051	MYCBP2-AS1	processed_transcript	MYCBP2 antisense RNA 1	2.29512	-22.3998	4.64611	-4.82119	1.42706e-06	0.00016618
ENSG00000134684	YARS	protein_coding	tyrosyl-tRNA synthetase	5989.8	-0.0909558	0.227155	-0.400413	0.688852	0.999962
ENSG00000055130	CUL1	protein_coding	cullin 1	870.693	0.0943268	0.434469	0.217108	0.828124	0.999962
ENSG00000072756	TRNT1	protein_coding	tRNA nucleotidyl transferase 1	273.581	0.171393	0.409842	0.418192	0.675807	0.999962
ENSG00000114902	SPCS1	protein_coding	signal peptidase complex subunit 1	4485.33	0.107836	0.114583	0.941117	0.346645	0.989804
ENSG00000239269	RPSAP4	processed_pseudogene	ribosomal protein SA pseudogene 4	9.758	0.51443	0.779255	0.660156	0.509154	0.999962
ENSG00000224904	AL021155.1	processed_pseudogene		3.28977	-0.80717	3.31203	-0.243709	0.807456	0.999962
ENSG00000273899	NOL12	protein_coding	nucleolar protein 12	1985.06	0.233767	0.213664	1.09408	0.273918	0.963912
ENSG00000218208	RPS27AP11	processed_pseudogene	ribosomal protein S27a pseudogene 11	1.7758	-2.65753	2.84057	-0.935563	0.349498	0.993293
ENSG00000068903	SIRT2	protein_coding	sirtuin 2	24136.3	0.18621	0.19934	0.934135	0.350234	0.993977
ENSG00000278952	AP003068.4	TEC		6.16817	0.380662	2.64597	0.143865	0.885607	0.999962
ENSG00000123243	ITIH5	protein_coding	inter-alpha-trypsin inhibitor heavy chain family member 5	18.1926	1.57623	2.24204	0.703035	0.482034	0.999962
ENSG00000151657	KIN	protein_coding	Kin17 DNA and RNA binding protein	85.2554	-0.0570997	1.14758	-0.0497565	0.960316	0.999962
ENSG00000204967	PCDHA4	protein_coding	protocadherin alpha 4	24.4801	1.91111	1.81492	1.053	0.292341	0.967221
ENSG00000273176	AL008635.1	antisense		0.433236	0.0180229	4.67466	0.00385545	0.996924	0.999962
ENSG00000117114	ADGRL2	protein_coding	adhesion G protein-coupled receptor L2	100.302	0.357069	0.977	0.365475	0.714757	0.999962
ENSG00000120327	PCDHB14	protein_coding	protocadherin beta 14	23.4289	0.751284	1.41069	0.532564	0.594336	0.999962
ENSG00000198742	SMURF1	protein_coding	SMAD specific E3 ubiquitin protein ligase 1	4332.56	-0.0930113	0.203503	-0.45705	0.647635	0.999962
ENSG00000134686	PHC2	protein_coding	polyhomeotic homolog 2	33886.8	0.0666279	0.179359	0.371479	0.710281	0.999962
ENSG00000115806	GORASP2	protein_coding	golgi reassembly stacking protein 2	5271.89	0.0170433	0.179478	0.0949603	0.924346	0.999962
ENSG00000196873	CBWD3	protein_coding	COBW domain containing 3	303.375	0.035628	0.374027	0.0952553	0.924112	0.999962
ENSG00000137101	CD72	protein_coding	CD72 molecule	47.991	-1.13639	1.07328	-1.05881	0.289688	0.96587
ENSG00000267157	AC011499.1	protein_coding		54.4873	0.752542	0.636715	1.18191	0.237239	0.945341
ENSG00000230626	AC011005.1	protein_coding		248.389	0.453438	0.299083	1.51609	0.129495	0.729641
ENSG00000161149	TUBA3FP	processed_transcript	tubulin alpha 3f pseudogene	117.645	-1.69242	0.811117	-2.08653	0.0369306	0.325987
ENSG00000104856	RELB	protein_coding	RELB proto-oncogene, NF-kB subunit	2055.76	0.408961	0.217993	1.87603	0.0606511	0.465456
ENSG00000257954	AC125611.2	processed_pseudogene		1.16484	2.30935	4.59485	0.502594	0.61525	0.999962
ENSG00000161800	RACGAP1	protein_coding	Rac GTPase activating protein 1	2841.91	-0.629733	0.471229	-1.33636	0.181431	0.855198
ENSG00000090971	NAT14	protein_coding	N-acetyltransferase 14 (putative)	11267.6	-0.529316	0.392376	-1.349	0.177337	0.848026
ENSG00000261288	AC093525.5	sense_intronic		1.36462	-0.854163	4.51865	-0.189031	0.850069	0.999962
ENSG00000168992	OR7E102P	unprocessed_pseudogene	olfactory receptor family 7 subfamily E member 102 pseudogene	0.539644	17.1075	4.6465	3.68181	0.000231586	0.00459614
ENSG00000196131	VN1R2	protein_coding	vomeronasal 1 receptor 2	0.704887	-18.4017	4.64682	-3.96006	7.49294e-05	0.00239924
ENSG00000214067	AL360182.1	processed_pseudogene		0.903719	1.19414	4.62327	0.25829	0.796183	0.999962
ENSG00000267034	AC010980.2	lincRNA		118.059	0.661323	0.497718	1.32871	0.183943	0.86037
ENSG00000160233	LRRC3	protein_coding	leucine rich repeat containing 3	2208.45	0.61115	0.292411	2.09004	0.0366141	0.323823
ENSG00000146731	CCT6A	protein_coding	chaperonin containing TCP1 subunit 6A	5270.93	-0.126425	0.345564	-0.365852	0.714476	0.999962
ENSG00000066739	ATG2B	protein_coding	autophagy related 2B	859.722	-0.528117	0.418785	-1.26107	0.207284	0.906334
ENSG00000143195	ILDR2	protein_coding	immunoglobulin like domain containing receptor 2	33.7204	-0.222814	2.23332	-0.0997682	0.920528	0.999962
ENSG00000213221	DNLZ	protein_coding	DNL-type zinc finger	3138.18	0.200432	0.20795	0.963849	0.335122	0.989184
ENSG00000123612	ACVR1C	protein_coding	activin A receptor type 1C	113.732	0.913166	0.804112	1.13562	0.256116	0.952394
ENSG00000230912	AL021707.4	antisense		2.42753	1.78378	3.44582	0.517665	0.604692	0.999962
ENSG00000213096	ZNF254	protein_coding	zinc finger protein 254	40.9394	-0.709924	1.01078	-0.702356	0.482457	0.999962
ENSG00000273356	LINC02019	lincRNA	long intergenic non-protein coding RNA 2019	11.1738	0.268249	1.85229	0.14482	0.884853	0.999962
ENSG00000151655	ITIH2	protein_coding	inter-alpha-trypsin inhibitor heavy chain 2	0.834845	0.109823	4.63204	0.0237094	0.981084	0.999962
ENSG00000259086	AL136298.3	processed_pseudogene		11.6301	-0.708427	1.37417	-0.515532	0.606182	0.999962
ENSG00000263004	AC007114.1	lincRNA		40.4158	0.435398	1.20328	0.361843	0.717469	0.999962
ENSG00000241449	AC092666.1	lincRNA		0.44432	-4.43598	4.67466	-0.94894	0.342651	0.989184
ENSG00000248394	FOSL1P1	processed_pseudogene	FOS like 1, AP-1 transcription factor subunit pseudogene 1	0.245297	-1.19384	4.63394	-0.257629	0.796693	0.999962
ENSG00000182220	ATP6AP2	protein_coding	ATPase H+ transporting accessory protein 2	3479	-0.155176	0.307511	-0.50462	0.613825	0.999962
ENSG00000275395	FCGBP	protein_coding	Fc fragment of IgG binding protein	54.4108	0.719885	1.76069	0.408866	0.682638	0.999962
ENSG00000187398	LUZP2	protein_coding	leucine zipper protein 2	2.68753	-17.881	4.67466	-3.82509	0.000130722	0.00305494
ENSG00000164548	TRA2A	protein_coding	transformer 2 alpha homolog	859.648	-0.0279356	0.289842	-0.096382	0.923217	0.999962
ENSG00000103187	COTL1	protein_coding	coactosin like F-actin binding protein 1	19583	0.406496	0.237249	1.71337	0.0866441	0.583098
ENSG00000213235	EEF1A1P16	processed_pseudogene	eukaryotic translation elongation factor 1 alpha 1 pseudogene 16	32.4844	0.52108	0.59547	0.875073	0.381534	0.999911
ENSG00000274810	NPHP3-ACAD11	protein_coding	NPHP3-ACAD11 readthrough (NMD candidate)	142.292	-0.230617	1.23795	-0.186289	0.852218	0.999962
ENSG00000168032	ENTPD3	protein_coding	ectonucleoside triphosphate diphosphohydrolase 3	86.8957	3.93716	2.20565	1.78503	0.0742562	0.530521
ENSG00000167157	PRRX2	protein_coding	paired related homeobox 2	4.85481	0.762601	4.61652	0.165189	0.868795	0.999962
ENSG00000137449	CPEB2	protein_coding	cytoplasmic polyadenylation element binding protein 2	1520.13	-0.6014	0.275694	-2.18141	0.0291534	0.273837
ENSG00000167676	PLIN4	protein_coding	perilipin 4	25.5679	0.564167	1.66312	0.339222	0.734443	0.999962
ENSG00000145832	SLC25A48	protein_coding	solute carrier family 25 member 48	55.4116	1.10092	1.45349	0.757437	0.448788	0.999962
ENSG00000280355	AL132656.4	TEC		20.8989	2.44315	1.5228	1.60439	0.108629	0.666974
ENSG00000112742	TTK	protein_coding	TTK protein kinase	158.247	-0.377489	1.37226	-0.275087	0.78325	0.999962
ENSG00000188846	RPL14	protein_coding	ribosomal protein L14	7289.8	-0.0518879	0.263709	-0.196762	0.844014	0.999962
ENSG00000124701	APOBEC2	protein_coding	apolipoprotein B mRNA editing enzyme catalytic subunit 2	16.1163	0.453084	1.91004	0.237212	0.812492	0.999962
ENSG00000229334	AC046143.1	antisense		26.2528	-1.27164	1.34863	-0.942914	0.345725	0.989184
ENSG00000233619	AC006328.1	processed_pseudogene		0.66704	-3.35613	4.59232	-0.730815	0.464892	0.999962
ENSG00000176108	CHMP6	protein_coding	charged multivesicular body protein 6	12860.2	0.209158	0.168588	1.24065	0.214736	0.920166
ENSG00000254341	SNORD87	snoRNA	small nucleolar RNA, C/D box 87	6.0362	-3.57285	1.59133	-2.2452	0.0247554	0.240484
ENSG00000005381	MPO	protein_coding	myeloperoxidase	1.95965	0.624685	4.56493	0.136844	0.891154	0.999962
ENSG00000158079	PTPDC1	protein_coding	protein tyrosine phosphatase domain containing 1	474.815	-0.376242	0.398676	-0.943729	0.345308	0.989184
ENSG00000204611	ZNF616	protein_coding	zinc finger protein 616	52.1343	0.34337	1.32239	0.259658	0.795128	0.999962
ENSG00000130222	GADD45G	protein_coding	growth arrest and DNA damage inducible gamma	141.921	0.292904	1.00417	0.291687	0.770526	0.999962
ENSG00000066422	ZBTB11	protein_coding	zinc finger and BTB domain containing 11	169.247	0.550797	0.754001	0.730499	0.465085	0.999962
ENSG00000101557	USP14	protein_coding	ubiquitin specific peptidase 14	1690.28	-0.27778	0.37445	-0.741834	0.458188	0.999962
ENSG00000260804	LINC01963	lincRNA	long intergenic non-protein coding RNA 1963	175.282	0.641524	0.799174	0.802733	0.422129	0.999962
ENSG00000232906	AC092685.1	processed_pseudogene		0.272662	-0.781296	4.64812	-0.168089	0.866514	0.999962
ENSG00000205267	DGAT2L7P	unprocessed_pseudogene	diacylglycerol O-acyltransferase 2 like 7, pseudogene	1.07047	16.9504	4.64604	3.64836	0.000263919	0.00499411
ENSG00000067840	PDZD4	protein_coding	PDZ domain containing 4	2389.82	0.525131	0.367733	1.42802	0.153285	0.791824
ENSG00000114739	ACVR2B	protein_coding	activin A receptor type 2B	557.551	0.36356	0.335583	1.08337	0.278646	0.963912
ENSG00000224236	MRRFP1	processed_pseudogene	mitochondrial ribosome recycling factor pseudogene 1	1.52936	3.89876	4.5587	0.855237	0.39242	0.999962
ENSG00000227076	AL158166.1	sense_intronic		0.596431	-4.44285	4.67466	-0.950412	0.341903	0.989184
ENSG00000267676	THA1P	unitary_pseudogene	threonine aldolase 1, pseudogene	3.53839	-1.25592	2.02302	-0.620813	0.534722	0.999962
ENSG00000230992	FAM201B	processed_pseudogene	family with sequence similarity 201 member B	1.17251	-4.61816	4.67466	-0.987914	0.323195	0.989184
ENSG00000162888	C1orf147	antisense	chromosome 1 open reading frame 147	20.2788	0.363251	1.799	0.201919	0.83998	0.999962
ENSG00000129473	BCL2L2	protein_coding	BCL2 like 2	2841.31	0.172568	0.435752	0.396023	0.692088	0.999962
ENSG00000163661	PTX3	protein_coding	pentraxin 3	17.137	2.13531	2.37462	0.89922	0.368535	0.997681
ENSG00000225541	AC002480.1	sense_overlapping		2.77523	0.0180053	4.67466	0.00385168	0.996927	0.999962
ENSG00000255119	AP003385.3	antisense		14.4939	1.32112	2.30098	0.574154	0.565864	0.999962
ENSG00000275401	AL391095.3	lincRNA		0.712405	-16.8615	4.63135	-3.64073	0.000271867	0.00511142
ENSG00000091972	CD200	protein_coding	CD200 molecule	346.753	0.340677	0.552375	0.616751	0.537399	0.999962
ENSG00000262655	SPON1	protein_coding	spondin 1	8.67419	0.631756	2.32463	0.271766	0.785802	0.999962
ENSG00000221340	RNU6ATAC18P	snRNA	RNA, U6atac small nuclear 18, pseudogene	0.368475	-11.8484	4.67466	-2.5346	0.0112577	0.124446
ENSG00000260394	Z92544.1	antisense		30.1525	0.769693	0.74886	1.02782	0.304035	0.978001
ENSG00000275708	MIR3648-1	miRNA	microRNA 3648-1	192.201	-0.077165	0.684229	-0.112777	0.910208	0.999962
ENSG00000135547	HEY2	protein_coding	hes related family bHLH transcription factor with YRPW motif 2	14.4125	2.54028	1.48422	1.71152	0.0869857	0.584149
ENSG00000236723	AL606760.2	antisense		8.5288	0.0304775	2.07662	0.0146765	0.98829	0.999962
ENSG00000116852	KIF21B	protein_coding	kinesin family member 21B	133.751	-0.0632557	0.477573	-0.132452	0.894626	0.999962
ENSG00000196497	IPO4	protein_coding	importin 4	13234.8	-0.209582	0.320777	-0.653358	0.513526	0.999962
ENSG00000114737	CISH	protein_coding	cytokine inducible SH2 containing protein	406.338	-0.436061	0.35954	-1.21283	0.225195	0.936358
ENSG00000259429	UBE2Q2P2	transcribed_unprocessed_pseudogene	ubiquitin conjugating enzyme E2 Q2 pseudogene 2	31.8148	-0.778776	1.5502	-0.502371	0.615407	0.999962
ENSG00000238123	MID1IP1-AS1	antisense	MID1IP1 antisense RNA 1	38.8935	-0.0121183	0.556894	-0.0217605	0.982639	0.999962
ENSG00000240687	AC082651.1	lincRNA		3.60935	24.1817	4.59068	5.26757	1.38243e-07	2.4461e-05
ENSG00000269958	AL049840.4	sense_intronic		474.524	-0.191502	0.308078	-0.621604	0.534202	0.999962
ENSG00000227857	AL358075.2	antisense		0.260511	0.0180255	4.67466	0.003856	0.996923	0.999962
ENSG00000110344	UBE4A	protein_coding	ubiquitination factor E4A	1837.52	-0.0319406	0.433578	-0.0736674	0.941275	0.999962
ENSG00000256092	AC137767.1	lincRNA		74.4703	0.354471	0.777764	0.455757	0.648565	0.999962
ENSG00000253953	PCDHGB4	protein_coding	protocadherin gamma subfamily B, 4	544.975	2.44817	3.95821	0.618506	0.536242	0.999962
ENSG00000184363	PKP3	protein_coding	plakophilin 3	180.367	1.34902	0.672147	2.00704	0.0447459	0.374702
ENSG00000125753	VASP	protein_coding	vasodilator stimulated phosphoprotein	10953.9	-0.126878	0.222042	-0.571413	0.56772	0.999962
ENSG00000196810	CTBP1-AS2	antisense	CTBP1 antisense RNA 2 (head to head)	1014.42	-0.544119	0.590955	-0.920744	0.357184	0.996495
ENSG00000225063	AC093422.2	antisense		0.200833	-5.61752	4.67466	-1.2017	0.229481	0.938769
ENSG00000168000	BSCL2	protein_coding	BSCL2, seipin lipid droplet biogenesis associated	18151.6	0.109034	0.243655	0.447495	0.654518	0.999962
ENSG00000197857	ZNF44	protein_coding	zinc finger protein 44	64.8856	-0.247885	0.870862	-0.284643	0.775918	0.999962
ENSG00000224406	LINC02052	lincRNA	long intergenic non-protein coding RNA 2052	2.20563	-5.91901	4.67466	-1.26619	0.205445	0.90235
ENSG00000213394	RPSAP46	processed_pseudogene	ribosomal protein SA pseudogene 46	1.14643	-3.35961	3.25	-1.03373	0.301263	0.974839
ENSG00000238133	MAP3K20-AS1	antisense	MAP3K20 antisense RNA 1	0.770362	0.282969	4.62133	0.0612311	0.951175	0.999962
ENSG00000110497	AMBRA1	protein_coding	autophagy and beclin 1 regulator 1	13497.5	-0.30581	0.264551	-1.15595	0.2477	0.949576
ENSG00000280326	AC067931.2	TEC		2.01437	14.1116	4.64862	3.03565	0.00240015	0.0309668
ENSG00000248871	TNFSF12-TNFSF13	protein_coding	TNFSF12-TNFSF13 readthrough	782.843	-10.7126	4.52892	-2.36536	0.0180123	0.184425
ENSG00000163462	TRIM46	protein_coding	tripartite motif containing 46	860.255	-0.35505	0.248279	-1.43005	0.152704	0.790164
ENSG00000148798	INA	protein_coding	internexin neuronal intermediate filament protein alpha	146.199	1.09853	0.991324	1.10815	0.267798	0.961298
ENSG00000174130	TLR6	protein_coding	toll like receptor 6	26.751	-4.91686	1.50092	-3.2759	0.00105325	0.0148781
ENSG00000234336	JAZF1-AS1	antisense	JAZF1 antisense RNA 1	10.5551	-1.54879	3.01148	-0.514295	0.607046	0.999962
ENSG00000112685	EXOC2	protein_coding	exocyst complex component 2	1471.81	-0.297285	0.347739	-0.854909	0.392602	0.999962
ENSG00000277049	RNA5SP530	rRNA	RNA, 5S ribosomal pseudogene 530	5.66096	-2.95224	2.8478	-1.03668	0.299886	0.973068
ENSG00000081803	CADPS2	protein_coding	calcium dependent secretion activator 2	121.433	-0.735794	0.993235	-0.740805	0.458812	0.999962
ENSG00000181038	METTL23	protein_coding	methyltransferase like 23	973.448	-0.0163136	0.19923	-0.0818833	0.93474	0.999962
ENSG00000253930	TNFRSF10A-AS1	antisense	TNFRSF10A antisense RNA 1	1.27706	0.0179969	4.67466	0.00384988	0.996928	0.999962
ENSG00000054803	CBLN4	protein_coding	cerebellin 4 precursor	5.06893	16.4951	4.6193	3.5709	0.000355753	0.00604617
ENSG00000172927	MYEOV	protein_coding	myeloma overexpressed	437.011	0.0763231	0.392227	0.194589	0.845715	0.999962
ENSG00000259408	AC010809.2	antisense		3.32835	2.60401	3.08617	0.843769	0.398799	0.999962
ENSG00000237810	AC104852.1	processed_pseudogene		1.10706	14.8139	4.62256	3.20469	0.00135206	0.0186827
ENSG00000077063	CTTNBP2	protein_coding	cortactin binding protein 2	314.72	-0.179543	0.745572	-0.240813	0.8097	0.999962
ENSG00000156675	RAB11FIP1	protein_coding	RAB11 family interacting protein 1	4359.74	-0.090808	0.208453	-0.435629	0.663106	0.999962
ENSG00000225265	TAF1A-AS1	antisense	TAF1A antisense RNA 1	19.4345	-0.382763	1.54507	-0.247731	0.804342	0.999962
ENSG00000185774	KCNIP4	protein_coding	potassium voltage-gated channel interacting protein 4	12.4257	-1.19244	1.84058	-0.64786	0.517075	0.999962
ENSG00000144677	CTDSPL	protein_coding	CTD small phosphatase like	1541.17	-0.110962	0.545387	-0.203456	0.838779	0.999962
ENSG00000182257	PRR34	protein_coding	proline rich 34	124.958	0.581999	0.507946	1.14579	0.251882	0.949576
ENSG00000176428	VPS37D	protein_coding	VPS37D, ESCRT-I subunit	2119.58	0.340565	0.246661	1.3807	0.167372	0.82502
ENSG00000163875	MEAF6	protein_coding	MYST/Esa1 associated factor 6	1322.53	0.0886792	0.183091	0.484346	0.62814	0.999962
ENSG00000137094	DNAJB5	protein_coding	DnaJ heat shock protein family (Hsp40) member B5	1687.63	-0.0966814	0.344166	-0.280915	0.778776	0.999962
ENSG00000253506	NACA2	protein_coding	nascent polypeptide associated complex alpha subunit 2	2.80818	2.76417	2.02855	1.36263	0.172999	0.838499
ENSG00000179818	PCBP1-AS1	processed_transcript	PCBP1 antisense RNA 1	355.568	-0.223832	0.378553	-0.591283	0.554331	0.999962
ENSG00000234745	HLA-B	protein_coding	major histocompatibility complex, class I, B	2490.91	0.270894	0.496447	0.545665	0.585296	0.999962
ENSG00000277749	AC023300.2	antisense		0.475178	-18.1282	4.64712	-3.90094	9.58189e-05	0.00253738
ENSG00000158560	DYNC1I1	protein_coding	dynein cytoplasmic 1 intermediate chain 1	98.6434	-0.970092	0.996909	-0.9731	0.330504	0.989184
ENSG00000101000	PROCR	protein_coding	protein C receptor	1742.05	-0.0908958	0.225285	-0.403471	0.686602	0.999962
ENSG00000272507	RNU6-88P	snRNA	RNA, U6 small nuclear 88, pseudogene	3.10674	0.628635	2.62352	0.239616	0.810628	0.999962
ENSG00000099849	RASSF7	protein_coding	Ras association domain family member 7	674.916	0.262585	0.308219	0.851943	0.394246	0.999962
ENSG00000249035	CLMAT3	antisense	colorectal liver metastasis associated transcript 3	3.34933	-0.446552	3.11171	-0.143507	0.88589	0.999962
ENSG00000119138	KLF9	protein_coding	Kruppel like factor 9	1148.26	-0.199614	0.338749	-0.58927	0.55568	0.999962
ENSG00000174021	GNG5	protein_coding	G protein subunit gamma 5	10233.4	0.0415062	0.189384	0.219164	0.826522	0.999962
ENSG00000136732	GYPC	protein_coding	glycophorin C (Gerbich blood group)	35968.7	-0.039824	0.155555	-0.256012	0.797942	0.999962
ENSG00000023697	DERA	protein_coding	deoxyribose-phosphate aldolase	1985.09	0.367781	0.246647	1.49112	0.135929	0.747556
ENSG00000106105	GARS	protein_coding	glycyl-tRNA synthetase	3967.87	0.0522845	0.238228	0.219472	0.826282	0.999962
ENSG00000175514	GPR152	protein_coding	G protein-coupled receptor 152	2.88046	-1.17875	4.56861	-0.25801	0.796399	0.999962
ENSG00000198863	RUNDC1	protein_coding	RUN domain containing 1	2515.38	-0.192799	0.210968	-0.913877	0.360782	0.997195
ENSG00000163349	HIPK1	protein_coding	homeodomain interacting protein kinase 1	1885.72	-0.0908109	0.245268	-0.370252	0.711195	0.999962
ENSG00000206838	SNORA5A	snoRNA	small nucleolar RNA, H/ACA box 5A	28.7291	-2.68779	0.879246	-3.05692	0.00223621	0.0291692
ENSG00000105278	ZFR2	protein_coding	zinc finger RNA binding protein 2	3.53058	5.02369	3.62709	1.38505	0.166038	0.821451
ENSG00000179242	CDH4	protein_coding	cadherin 4	5.39728	-2.71825	1.77914	-1.52784	0.126552	0.721728
ENSG00000234338	AC073349.2	processed_pseudogene		1.74647	1.02263	4.57233	0.223656	0.823025	0.999962
ENSG00000278662	GOLGA6L10	protein_coding	golgin A6 family-like 10	0.395062	-18.8563	4.6465	-4.05817	4.94595e-05	0.00196259
ENSG00000232549	SRD5A1P1	processed_pseudogene	steroid 5 alpha-reductase 1 pseudogene 1	11.1707	0.418347	1.30353	0.320934	0.74826	0.999962
ENSG00000172345	STARD5	protein_coding	StAR related lipid transfer domain containing 5	467.03	0.109758	0.354014	0.310038	0.756532	0.999962
ENSG00000271614	ATP2B1-AS1	lincRNA	ATP2B1 antisense RNA 1	30.6299	0.531921	0.768001	0.692605	0.488558	0.999962
ENSG00000172007	RAB33B	protein_coding	RAB33B, member RAS oncogene family	139.565	-0.381555	0.640169	-0.596022	0.55116	0.999962
ENSG00000207839	MIR33B	miRNA	microRNA 33b	1.11303	6.9453	4.59646	1.51101	0.130785	0.732382
ENSG00000124915	AP002380.1	lincRNA		2.20563	-5.91901	4.67466	-1.26619	0.205445	0.90235
ENSG00000270890	AL049844.2	processed_pseudogene		3.20091	-2.34053	2.65917	-0.880172	0.378766	0.999059
ENSG00000154222	CC2D1B	protein_coding	coiled-coil and C2 domain containing 1B	15061.4	-0.147114	0.211876	-0.694339	0.487469	0.999962
ENSG00000264364	DYNLL2	protein_coding	dynein light chain LC8-type 2	23003	-0.0257958	0.201251	-0.128177	0.898009	0.999962
ENSG00000274559	H2BFS	protein_coding	H2B histone family member S	11.693	-0.266921	0.85468	-0.312306	0.754808	0.999962
ENSG00000267672	AC010632.2	sense_intronic		1.5567	18.8541	4.64582	4.0583	4.94305e-05	0.00196259
ENSG00000234751	AP002381.1	processed_pseudogene		1.2644	0.368958	2.66112	0.138648	0.889729	0.999962
ENSG00000213959	AL035419.1	processed_pseudogene		0.635869	15.0408	4.63272	3.24666	0.00116769	0.0163171
ENSG00000266853	ITM2BP1	processed_pseudogene	integral membrane protein 2B pseudogene 1	1.7595	-25.8378	4.59766	-5.61977	1.91208e-08	5.44807e-06
ENSG00000103932	RPAP1	protein_coding	RNA polymerase II associated protein 1	13713.9	-0.0688559	0.222972	-0.308809	0.757467	0.999962
ENSG00000207304	SNORA8	snoRNA	small nucleolar RNA, H/ACA box 8	7.49689	0.991076	1.60515	0.617433	0.536949	0.999962
ENSG00000173113	TRMT112	protein_coding	tRNA methyltransferase subunit 11-2	10561.9	6.43861e-05	0.176454	0.00036489	0.999709	0.999962
ENSG00000091732	ZC3HC1	protein_coding	zinc finger C3HC-type containing 1	1837.9	0.188799	0.201933	0.934959	0.34981	0.993623
ENSG00000170608	FOXA3	protein_coding	forkhead box A3	30.0481	-0.176117	1.95081	-0.0902789	0.928066	0.999962
ENSG00000254801	AC084851.1	processed_pseudogene		0.614172	-4.43598	4.67466	-0.948941	0.342651	0.989184
ENSG00000260902	LINC02011	lincRNA	long intergenic non-protein coding RNA 2011	0.356824	16.1338	4.64776	3.47131	0.000517934	0.00794662
ENSG00000255521	AL356215.1	antisense		8.16187	2.77496	2.76461	1.00374	0.315502	0.987175
ENSG00000214064	RPL6P5	processed_pseudogene	ribosomal protein L6 pseudogene 5	0.268278	16.4884	4.64682	3.54832	0.000387696	0.00626219
ENSG00000167641	PPP1R14A	protein_coding	protein phosphatase 1 regulatory inhibitor subunit 14A	42.6562	-1.4914	1.0546	-1.41419	0.157307	0.803218
ENSG00000111716	LDHB	protein_coding	lactate dehydrogenase B	17622.2	-0.0699242	0.268435	-0.260488	0.794487	0.999962
ENSG00000135899	SP110	protein_coding	SP110 nuclear body protein	409.617	-0.335899	0.230228	-1.45898	0.144569	0.768803
ENSG00000227527	AC096540.1	sense_overlapping		4.88106	-1.8357	3.8212	-0.4804	0.630943	0.999962
ENSG00000162068	NTN3	protein_coding	netrin 3	12.7745	-5.06719	2.55252	-1.98517	0.0471252	0.389138
ENSG00000140365	COMMD4	protein_coding	COMM domain containing 4	12087.1	0.34845	0.161075	2.16328	0.0305196	0.282867
ENSG00000122756	CNTFR	protein_coding	ciliary neurotrophic factor receptor	10.4997	-2.70455	2.79217	-0.96862	0.332735	0.989184
ENSG00000261408	TEN1-CDK3	processed_transcript	TEN1-CDK3 readthrough (NMD candidate)	1036.91	-0.335818	1.18058	-0.284453	0.776064	0.999962
ENSG00000176407	KCMF1	protein_coding	potassium channel modulatory factor 1	2566.91	0.127968	0.190353	0.672265	0.501415	0.999962
ENSG00000282890	AC009975.1	lincRNA		0.819664	-4.02809	4.67466	-0.861685	0.388861	0.999911
ENSG00000272486	AC090922.1	antisense		3.3471	-2.71435	4.47856	-0.606076	0.544464	0.999962
ENSG00000060762	MPC1	protein_coding	mitochondrial pyruvate carrier 1	1689.79	-0.126459	0.298157	-0.424134	0.671468	0.999962
ENSG00000184083	FAM120C	protein_coding	family with sequence similarity 120C	580.088	-0.436659	0.258266	-1.69073	0.0908877	0.601407
ENSG00000206341	HLA-H	unprocessed_pseudogene	major histocompatibility complex, class I, H (pseudogene)	896.545	-0.113484	0.408216	-0.278	0.781013	0.999962
ENSG00000211584	SLC48A1	protein_coding	solute carrier family 48 member 1	6642.81	-0.0911838	0.265381	-0.343596	0.73115	0.999962
ENSG00000278921	EPB41L4A-AS2	lincRNA	EPB41L4A antisense RNA 2 (head to head)	158.594	-0.192668	0.567353	-0.339592	0.734164	0.999962
ENSG00000225632	AL161644.1	antisense		0.534575	-18.3091	4.64691	-3.94005	8.14637e-05	0.00244958
ENSG00000106333	PCOLCE	protein_coding	procollagen C-endopeptidase enhancer	1581.66	0.0136803	0.251749	0.0543412	0.956663	0.999962
ENSG00000255031	AP002807.1	antisense		9.90283	1.41469	1.16276	1.21666	0.223735	0.933902
ENSG00000124253	PCK1	protein_coding	phosphoenolpyruvate carboxykinase 1	12.3714	0.0179806	3.76765	0.00477237	0.996192	0.999962
ENSG00000214264	KCTD9P4	processed_pseudogene	potassium channel tetramerization domain containing 9 pseudogene 4	3.99441	9.44315	4.42646	2.13334	0.0328968	0.300001
ENSG00000273783	AL136040.1	antisense		14.0155	2.89912	1.81056	1.60122	0.109328	0.669303
ENSG00000099817	POLR2E	protein_coding	RNA polymerase II subunit E	37743.4	0.0276449	0.16148	0.171197	0.864069	0.999962
ENSG00000113552	GNPDA1	protein_coding	glucosamine-6-phosphate deaminase 1	8602.05	0.113549	0.192646	0.58942	0.55558	0.999962
ENSG00000185271	KLHL33	protein_coding	kelch like family member 33	2.13867	-1.0346	4.61913	-0.223982	0.822771	0.999962
ENSG00000234492	RPL34-AS1	lincRNA	RPL34 antisense RNA 1 (head to head)	2.30916	-1.80406	4.61243	-0.391131	0.6957	0.999962
ENSG00000144711	IQSEC1	protein_coding	IQ motif and Sec7 domain 1	3383.48	-0.549858	0.229837	-2.39238	0.0167393	0.173764
ENSG00000173208	ABCD2	protein_coding	ATP binding cassette subfamily D member 2	13.526	-1.23786	2.56564	-0.482476	0.629468	0.999962
ENSG00000202538	RNU4-2	snRNA	RNA, U4 small nuclear 2	100.522	1.36743	0.68981	1.98233	0.047442	0.39103
ENSG00000144713	RPL32	protein_coding	ribosomal protein L32	16605.4	-0.257279	0.257088	-1.00074	0.316951	0.988044
ENSG00000250933	GAPDHP66	processed_pseudogene	glyceraldehyde-3-phosphate dehydrogenase pseudogene 66	6.09441	-0.715873	2.32516	-0.307881	0.758173	0.999962
ENSG00000279347	AC021945.1	TEC		3.08991	1.67315	4.58744	0.364724	0.715318	0.999962
ENSG00000269904	MAP2K4P1	transcribed_processed_pseudogene	mitogen-activated protein kinase kinase 4 pseudogene 1	1.02836	0.529812	4.58417	0.115574	0.90799	0.999962
ENSG00000233467	U40455.1	processed_pseudogene		1.26316	1.5097	4.65305	0.324453	0.745595	0.999962
ENSG00000242083	RPL7AP31	processed_pseudogene	ribosomal protein L7a pseudogene 31	43.753	0.0262379	0.502575	0.052207	0.958364	0.999962
ENSG00000126218	F10	protein_coding	coagulation factor X	86.297	1.54115	0.885089	1.74124	0.0816418	0.563031
ENSG00000233859	ADH5P4	processed_pseudogene	alcohol dehydrogenase 5 (class III), chi polypeptide, pseudogene 4	11.4253	-0.0292676	0.790933	-0.0370038	0.970482	0.999962
ENSG00000140299	BNIP2	protein_coding	BCL2 interacting protein 2	1409.57	-0.0772781	0.447181	-0.172812	0.862799	0.999962
ENSG00000252098	RF00019	misc_RNA		0.441527	17.0267	4.64682	3.66417	0.000248142	0.00479548
ENSG00000162522	KIAA1522	protein_coding	KIAA1522	12846.7	0.11869	0.210714	0.563276	0.573247	0.999962
ENSG00000155530	LRGUK	protein_coding	leucine rich repeats and guanylate kinase domain containing	9.4309	1.82043	3.10389	0.586499	0.55754	0.999962
ENSG00000185156	MFSD6L	protein_coding	major facilitator superfamily domain containing 6 like	6.45127	2.46356	2.63012	0.936675	0.348926	0.992782
ENSG00000183742	MACC1	protein_coding	MACC1, MET transcriptional regulator	78.3344	-0.387816	1.39675	-0.277656	0.781276	0.999962
ENSG00000237605	AL591846.2	antisense		4.80482	-4.13716	4.58444	-0.902434	0.366827	0.997681
ENSG00000225950	NTF4	protein_coding	neurotrophin 4	7.58762	1.21296	2.8332	0.428125	0.66856	0.999962
ENSG00000204138	PHACTR4	protein_coding	phosphatase and actin regulator 4	1428.69	-0.0683388	0.283346	-0.241185	0.809412	0.999962
ENSG00000200275	RNA5SP199	rRNA	RNA, 5S ribosomal pseudogene 199	0.502505	-4.4215	4.67466	-0.945845	0.344228	0.989184
ENSG00000101079	NDRG3	protein_coding	NDRG family member 3	3687.35	-0.0431316	0.230806	-0.186874	0.851759	0.999962
ENSG00000025708	TYMP	protein_coding	thymidine phosphorylase	15696.9	0.49999	0.214951	2.32606	0.0200153	0.20185
ENSG00000224687	RASAL2-AS1	lincRNA	RASAL2 antisense RNA 1	41.8222	1.43537	0.758653	1.89201	0.0584903	0.454724
ENSG00000280198	AC087163.3	TEC		13.6813	0.750629	1.05401	0.712164	0.476363	0.999962
ENSG00000225342	AC079630.1	antisense		2.77414	0.472965	3.23093	0.146387	0.883616	0.999962
ENSG00000075945	KIFAP3	protein_coding	kinesin associated protein 3	573.259	0.356782	0.379972	0.938969	0.347747	0.99133
ENSG00000267834	AL592211.1	lincRNA		4.7656	0.0792023	3.03977	0.0260553	0.979213	0.999962
ENSG00000015413	DPEP1	protein_coding	dipeptidase 1	4.08487	2.78998	4.57595	0.609706	0.542056	0.999962
ENSG00000257564	AC068993.1	processed_pseudogene		1.46318	1.12378	4.59803	0.244405	0.806917	0.999962
ENSG00000164975	SNAPC3	protein_coding	small nuclear RNA activating complex polypeptide 3	976.889	-0.056882	0.284602	-0.199865	0.841586	0.999962
ENSG00000280381	AC026362.2	TEC		5.52294	1.66607	2.48076	0.671597	0.501841	0.999962
ENSG00000173269	MMRN2	protein_coding	multimerin 2	5.22945	4.88071	3.65485	1.33541	0.181744	0.85589
ENSG00000150995	ITPR1	protein_coding	inositol 1,4,5-trisphosphate receptor type 1	207.923	0.157832	0.610931	0.258346	0.79614	0.999962
ENSG00000187753	C9orf153	protein_coding	chromosome 9 open reading frame 153	0.56125	-3.62453	4.58728	-0.790128	0.429453	0.999962
ENSG00000131779	PEX11B	protein_coding	peroxisomal biogenesis factor 11 beta	2628.59	0.756806	0.332156	2.27846	0.022699	0.223455
ENSG00000169814	BTD	protein_coding	biotinidase	3389.14	0.400872	0.319201	1.25586	0.209167	0.909896
ENSG00000124588	NQO2	protein_coding	N-ribosyldihydronicotinamide:quinone reductase 2	5537.83	0.225527	0.196332	1.1487	0.250679	0.949576
ENSG00000197619	ZNF615	protein_coding	zinc finger protein 615	21.7016	2.63859	1.65441	1.59488	0.110738	0.672801
ENSG00000254986	DPP3	protein_coding	dipeptidyl peptidase 3	21242.8	0.0686169	0.212786	0.32247	0.747097	0.999962
ENSG00000005471	ABCB4	protein_coding	ATP binding cassette subfamily B member 4	721.614	-0.561311	0.577309	-0.972289	0.330907	0.989184
ENSG00000126814	TRMT5	protein_coding	tRNA methyltransferase 5	304.36	0.132059	0.527531	0.250335	0.802328	0.999962
ENSG00000226953	AC010890.1	antisense		4.90034	0.6514	2.62335	0.248309	0.803896	0.999962
ENSG00000260464	AL049796.1	bidirectional_promoter_lncRNA		29.358	-1.8615	1.33514	-1.39423	0.163247	0.814859
ENSG00000133136	GNG5P2	processed_pseudogene	G protein subunit gamma 5 pseudogene 2	32.6007	0.348141	0.603695	0.576683	0.564153	0.999962
ENSG00000178719	GRINA	protein_coding	glutamate ionotropic receptor NMDA type subunit associated protein 1	70812.1	0.0459581	0.215481	0.213281	0.831107	0.999962
ENSG00000111875	ASF1A	protein_coding	anti-silencing function 1A histone chaperone	446.08	0.134208	0.406484	0.330167	0.741274	0.999962
ENSG00000272157	AC107373.2	antisense		1.26019	18.9546	4.64599	4.07977	4.50804e-05	0.00189567
ENSG00000261795	AC093627.7	lincRNA		0.725702	-16.5988	4.62946	-3.58547	0.000336471	0.00582127
ENSG00000103021	CCDC113	protein_coding	coiled-coil domain containing 113	18.9895	2.77604	1.90391	1.45807	0.14482	0.769541
ENSG00000284118	MIR4707	miRNA	microRNA 4707	94.7288	1.36475	1.48456	0.919297	0.35794	0.996495
ENSG00000174807	CD248	protein_coding	CD248 molecule	192.35	2.69877	0.986752	2.73501	0.00623788	0.0731708
ENSG00000171298	GAA	protein_coding	glucosidase alpha, acid	35432.7	-0.250833	0.314953	-0.796413	0.425792	0.999962
ENSG00000169129	AFAP1L2	protein_coding	actin filament associated protein 1 like 2	93.14	-0.699724	0.554692	-1.26146	0.207142	0.906003
ENSG00000226084	AC113935.1	processed_pseudogene		302.049	0.137268	0.266715	0.514662	0.60679	0.999962
ENSG00000168913	ENHO	protein_coding	energy homeostasis associated	310.178	-0.510078	0.327647	-1.55679	0.11952	0.697987
ENSG00000235387	SPAAR	protein_coding	small regulatory polypeptide of amino acid response	1.79672	0.0179917	4.67466	0.00384878	0.996929	0.999962
ENSG00000012983	MAP4K5	protein_coding	mitogen-activated protein kinase kinase kinase kinase 5	315.587	0.0291164	0.529398	0.0549991	0.956139	0.999962
ENSG00000273313	RBAKDN	lincRNA	RBAK downstream neighbor (non-protein coding)	62.9003	-0.845404	1.68577	-0.501495	0.616022	0.999962
ENSG00000152076	CCDC74B	protein_coding	coiled-coil domain containing 74B	567	-0.21286	0.183334	-1.16105	0.24562	0.949576
ENSG00000123739	PLA2G12A	protein_coding	phospholipase A2 group XIIA	805.278	0.00847392	0.37665	0.0224981	0.982051	0.999962
ENSG00000135124	P2RX4	protein_coding	purinergic receptor P2X 4	9434.29	-0.0274294	0.225745	-0.121506	0.90329	0.999962
ENSG00000162627	SNX7	protein_coding	sorting nexin 7	1292.12	0.156518	0.29035	0.539067	0.58984	0.999962
ENSG00000231064	AC234582.1	antisense		53.66	0.597074	0.550754	1.0841	0.278319	0.963912
ENSG00000106366	SERPINE1	protein_coding	serpin family E member 1	403.07	0.511493	0.453786	1.12717	0.259672	0.957223
ENSG00000234107	TPT1P1	processed_pseudogene	tumor protein, translationally-controlled 1 pseudogene 1	2.48446	-8.56307	4.67466	-1.83181	0.0669803	0.495425
ENSG00000180921	FAM83H	protein_coding	family with sequence similarity 83 member H	6311.43	-0.1746	0.209952	-0.831616	0.405626	0.999962
ENSG00000200354	SNORA71D	snoRNA	small nucleolar RNA, H/ACA box 71D	2.06281	3.5798	4.55633	0.785676	0.432057	0.999962
ENSG00000083312	TNPO1	protein_coding	transportin 1	3724.53	-0.373064	0.498864	-0.747827	0.454565	0.999962
ENSG00000213699	SLC35F6	protein_coding	solute carrier family 35 member F6	12117	-0.0327017	0.181867	-0.179812	0.8573	0.999962
ENSG00000176971	FIBIN	protein_coding	fin bud initiation factor homolog (zebrafish)	2.3817	0.0233502	4.62158	0.00505242	0.995969	0.999962
ENSG00000076864	RAP1GAP	protein_coding	RAP1 GTPase activating protein	6963.42	-0.196528	0.201508	-0.975287	0.329418	0.989184
ENSG00000171204	TMEM126B	protein_coding	transmembrane protein 126B	607.874	0.23155	0.368507	0.628345	0.529778	0.999962
ENSG00000279855	AC005618.2	antisense		0.819664	-4.02809	4.67466	-0.861685	0.388861	0.999911
ENSG00000174851	YIF1A	protein_coding	Yip1 interacting factor homolog A, membrane trafficking protein	22227.4	0.273937	0.201331	1.36063	0.17363	0.840002
ENSG00000276188	AC069234.4	lincRNA		1.44175	-2.69354	4.56992	-0.589407	0.555588	0.999962
ENSG00000271828	AC008937.3	antisense		4.63202	0.961924	2.34056	0.410981	0.681087	0.999962
ENSG00000120925	RNF170	protein_coding	ring finger protein 170	485.428	0.432528	0.533113	0.811325	0.417179	0.999962
ENSG00000232303	DFFBP1	processed_pseudogene	DNA fragmentation factor subunit beta pseudogene 1	10.6206	1.50214	2.01921	0.743925	0.456922	0.999962
ENSG00000154764	WNT7A	protein_coding	Wnt family member 7A	4.12162	-16.5832	4.67466	-3.54747	0.000388955	0.00627509
ENSG00000225422	RBMS1P1	processed_pseudogene	RNA binding motif single stranded interacting protein 1 pseudogene 1	87.9949	-0.0966416	0.547672	-0.176459	0.859933	0.999962
ENSG00000278989	AP001148.1	TEC		5.34799	4.18395	3.96198	1.05603	0.290956	0.96587
ENSG00000234284	ZNF879	protein_coding	zinc finger protein 879	20.2476	-2.70463	1.83032	-1.47769	0.139492	0.75761
ENSG00000250365	AL139353.2	antisense		5.37456	-0.0874603	2.99786	-0.0291743	0.976726	0.999962
ENSG00000164796	CSMD3	protein_coding	CUB and Sushi multiple domains 3	0.536505	-4.42158	4.67466	-0.945861	0.344219	0.989184
ENSG00000106012	IQCE	protein_coding	IQ motif containing E	5078.94	0.424802	0.37084	1.14551	0.251996	0.949576
ENSG00000049167	ERCC8	protein_coding	ERCC excision repair 8, CSA ubiquitin ligase complex subunit	283.287	0.0110208	0.464063	0.0237484	0.981053	0.999962
ENSG00000165140	FBP1	protein_coding	fructose-bisphosphatase 1	7.67064	-2.01841	3.85585	-0.523467	0.600649	0.999962
ENSG00000169981	ZNF35	protein_coding	zinc finger protein 35	116.322	-0.0772372	1.26693	-0.060964	0.951388	0.999962
ENSG00000204118	NAP1L6	transcribed_processed_pseudogene	nucleosome assembly protein 1 like 6	1.00912	-10.1168	4.67466	-2.16418	0.0304505	0.282418
ENSG00000036549	AC118549.1	protein_coding	ZZ-type zinc finger-containing protein 3	217.995	0.138438	0.505677	0.273768	0.784263	0.999962
ENSG00000239881	RPS27P25	transcribed_processed_pseudogene	ribosomal protein S27 pseudogene 25	0.416222	1.02423	4.6377	0.220849	0.82521	0.999962
ENSG00000157873	TNFRSF14	protein_coding	TNF receptor superfamily member 14	52895.3	0.0320996	0.21429	0.149795	0.880926	0.999962
ENSG00000228259	AC136604.1	unprocessed_pseudogene		0.409832	-4.26527	4.67466	-0.912424	0.361546	0.997195
ENSG00000174004	NRROS	protein_coding	negative regulator of reactive oxygen species	4233.15	0.0516398	0.211488	0.244174	0.807096	0.999962
ENSG00000058668	ATP2B4	protein_coding	ATPase plasma membrane Ca2+ transporting 4	4572.28	-0.302811	0.361946	-0.836619	0.402807	0.999962
ENSG00000100916	BRMS1L	protein_coding	breast cancer metastasis-suppressor 1 like	169.447	-0.0715513	0.523686	-0.13663	0.891323	0.999962
ENSG00000260989	AL133297.2	antisense		5.72154	1.52888	3.03419	0.503885	0.614342	0.999962
ENSG00000115839	RAB3GAP1	protein_coding	RAB3 GTPase activating protein catalytic subunit 1	1241.19	-0.00659564	0.46138	-0.0142954	0.988594	0.999962
ENSG00000285080	AC068724.3	antisense		0.929947	0.0180004	4.67466	0.00385063	0.996928	0.999962
ENSG00000151882	CCL28	protein_coding	C-C motif chemokine ligand 28	980.926	0.16601	0.231621	0.716734	0.473538	0.999962
ENSG00000284607	AL121936.1	lincRNA		0.578731	-5.00239	4.67466	-1.07011	0.284571	0.963912
ENSG00000162069	BICDL2	protein_coding	BICD family like cargo adaptor 2	16.7124	2.22627	2.96128	0.751794	0.452175	0.999962
ENSG00000253978	AC008637.1	antisense		7.23777	-0.136687	1.65795	-0.0824431	0.934294	0.999962
ENSG00000188234	AGAP4	protein_coding	ArfGAP with GTPase domain, ankyrin repeat and PH domain 4	43.2483	-0.768649	1.01725	-0.755615	0.44988	0.999962
ENSG00000268955	AC068020.1	lincRNA		1.91713	2.37334	3.62457	0.654791	0.512602	0.999962
ENSG00000274928	KRT89P	transcribed_unprocessed_pseudogene	keratin 89 pseudogene	0.260511	0.0180255	4.67466	0.003856	0.996923	0.999962
ENSG00000204856	FAM216A	protein_coding	family with sequence similarity 216 member A	175.052	-0.427686	0.346074	-1.23582	0.216525	0.922612
ENSG00000223861	AL365436.1	processed_pseudogene		2.59011	-0.180104	1.49796	-0.120233	0.904299	0.999962
ENSG00000064201	TSPAN32	protein_coding	tetraspanin 32	12.5506	1.61877	2.00576	0.807061	0.419631	0.999962
ENSG00000216657	GLRX3P2	processed_pseudogene	glutaredoxin 3 pseudogene 2	18.9129	0.202615	1.17222	0.172847	0.862772	0.999962
ENSG00000267719	LINC02078	lincRNA	long intergenic non-protein coding RNA 2078	0.477081	-18.2848	4.64628	-3.93536	8.30717e-05	0.00244958
ENSG00000025800	KPNA6	protein_coding	karyopherin subunit alpha 6	5901.25	-0.254948	0.368203	-0.692411	0.488679	0.999962
ENSG00000284617	AC134684.3	unprocessed_pseudogene		7.03432	-0.724077	1.60964	-0.449837	0.652828	0.999962
ENSG00000120697	ALG5	protein_coding	ALG5, dolichyl-phosphate beta-glucosyltransferase	984.284	0.369506	0.280676	1.31649	0.188011	0.866121
ENSG00000169118	CSNK1G1	protein_coding	casein kinase 1 gamma 1	1028.1	-0.0878546	0.366666	-0.239604	0.810637	0.999962
ENSG00000284946	AC068831.7	protein_coding		806.235	-0.0884494	0.716098	-0.123516	0.901699	0.999962
ENSG00000164172	MOCS2	protein_coding	molybdenum cofactor synthesis 2	814.673	0.132095	0.242902	0.543822	0.586564	0.999962
ENSG00000235770	LINC00607	lincRNA	long intergenic non-protein coding RNA 607	5.12319	-2.68659	3.70933	-0.724279	0.468894	0.999962
ENSG00000256234	AC022509.2	antisense		0.579755	15.566	4.62834	3.36319	0.000770487	0.0112634
ENSG00000277586	NEFL	protein_coding	neurofilament light	22.9531	1.3056	1.54537	0.844845	0.398197	0.999962
ENSG00000185684	EP400P1	transcribed_unprocessed_pseudogene	EP400 pseudogene 1	505.067	-0.255432	0.266056	-0.960069	0.33702	0.989184
ENSG00000092020	PPP2R3C	protein_coding	protein phosphatase 2 regulatory subunit B''gamma	476.574	-0.145395	0.402103	-0.361587	0.717661	0.999962
ENSG00000268350	FAM156A	protein_coding	family with sequence similarity 156 member A	402.61	0.263739	0.358998	0.734654	0.46255	0.999962
ENSG00000162086	ZNF75A	protein_coding	zinc finger protein 75a	154.948	-0.00508659	0.479634	-0.0106051	0.991538	0.999962
ENSG00000254231	AC103760.1	processed_transcript		0.770198	0.0180141	4.67466	0.00385355	0.996925	0.999962
ENSG00000071967	CYBRD1	protein_coding	cytochrome b reductase 1	4443.88	0.0272987	0.262331	0.104062	0.91712	0.999962
ENSG00000268941	LINC01711	lincRNA	long intergenic non-protein coding RNA 1711	4.47262	-17.9744	4.6475	-3.86755	0.000109934	0.00273321
ENSG00000278112	AC145423.3	sense_intronic		12.4824	-1.2027	1.19389	-1.00738	0.313754	0.986711
ENSG00000136463	TACO1	protein_coding	translational activator of cytochrome c oxidase I	4084.63	0.1783	0.168427	1.05862	0.289773	0.96587
ENSG00000132622	HSPA12B	protein_coding	heat shock protein family A (Hsp70) member 12B	363.631	0.110765	0.437282	0.253303	0.800034	0.999962
ENSG00000236876	TMSB4XP1	processed_pseudogene	thymosin beta 4, X-linked pseudogene 1	5.96664	0.656067	1.23625	0.530691	0.595633	0.999962
ENSG00000105401	CDC37	protein_coding	cell division cycle 37	12015.4	-0.101329	0.156483	-0.647545	0.51728	0.999962
ENSG00000240471	PHBP8	processed_pseudogene	prohibitin pseudogene 8	2.9942	1.41446	2.9272	0.483213	0.628945	0.999962
ENSG00000119227	PIGZ	protein_coding	phosphatidylinositol glycan anchor biosynthesis class Z	1363.5	-1.23354	0.27041	-4.56176	5.07263e-06	0.000450241
ENSG00000183807	FAM162B	protein_coding	family with sequence similarity 162 member B	1.26019	18.9546	4.64599	4.07977	4.50804e-05	0.00189567
ENSG00000261652	C15orf65	protein_coding	chromosome 15 open reading frame 65	21.5943	-0.854893	1.7525	-0.487812	0.625683	0.999962
ENSG00000064205	WISP2	protein_coding	WNT1 inducible signaling pathway protein 2	467.733	0.145096	0.462361	0.313815	0.753662	0.999962
ENSG00000263394	AC007952.7	lincRNA		2.3314	-1.7364	3.46416	-0.501246	0.616198	0.999962
ENSG00000278259	MYO19	protein_coding	myosin XIX	1574.08	0.0757982	0.272042	0.278627	0.780531	0.999962
ENSG00000102781	KATNAL1	protein_coding	katanin catalytic subunit A1 like 1	939.597	0.208327	0.348778	0.597307	0.550302	0.999962
ENSG00000260273	AL359711.2	antisense		19.0944	-0.912928	1.25546	-0.727165	0.467125	0.999962
ENSG00000236937	PTGES3P4	processed_pseudogene	prostaglandin E synthase 3 pseudogene 4	10.2259	0.473508	1.46571	0.323057	0.746652	0.999962
ENSG00000085872	CHERP	protein_coding	calcium homeostasis endoplasmic reticulum protein	11544.8	-0.112553	0.205435	-0.547877	0.583777	0.999962
ENSG00000139597	N4BP2L1	protein_coding	NEDD4 binding protein 2 like 1	111.015	0.563192	0.53319	1.05627	0.290846	0.96587
ENSG00000125869	LAMP5	protein_coding	lysosomal associated membrane protein family member 5	1.71544	0.111812	4.62268	0.0241877	0.980703	0.999962
ENSG00000164651	SP8	protein_coding	Sp8 transcription factor	0.623875	-19.1061	4.646	-4.11237	3.91611e-05	0.00177554
ENSG00000227962	AL391994.1	processed_pseudogene		0.524362	-3.41324	4.60472	-0.741247	0.458543	0.999962
ENSG00000151067	CACNA1C	protein_coding	calcium voltage-gated channel subunit alpha1 C	37.0162	0.802415	2.18893	0.366578	0.713934	0.999962
ENSG00000129003	VPS13C	protein_coding	vacuolar protein sorting 13 homolog C	337.686	0.460545	0.837084	0.550179	0.582197	0.999962
ENSG00000151006	PRSS53	protein_coding	serine protease 53	229.64	-0.0495065	0.353935	-0.139875	0.888759	0.999962
ENSG00000249485	RBBP4P1	processed_pseudogene	RB binding protein 4 pseudogene 1	161.469	-0.332238	0.45752	-0.726171	0.467734	0.999962
ENSG00000151364	KCTD14	protein_coding	potassium channel tetramerization domain containing 14	70.3731	-0.459205	0.925924	-0.495943	0.619935	0.999962
ENSG00000230082	PRRT3-AS1	antisense	PRRT3 antisense RNA 1	80.9739	0.392198	0.659399	0.594781	0.55199	0.999962
ENSG00000143924	EML4	protein_coding	echinoderm microtubule associated protein like 4	540.959	0.00479029	0.581905	0.00823207	0.993432	0.999962
ENSG00000058063	ATP11B	protein_coding	ATPase phospholipid transporting 11B (putative)	975.81	-0.17757	0.53894	-0.32948	0.741793	0.999962
ENSG00000176020	AMIGO3	protein_coding	adhesion molecule with Ig like domain 3	439.256	0.0969385	1.45643	0.066559	0.946933	0.999962
ENSG00000177119	ANO6	protein_coding	anoctamin 6	2134.11	-0.808846	0.393725	-2.05434	0.0399424	0.34607
ENSG00000280136	AC240565.1	lincRNA		3.46681	-2.07968	1.64836	-1.26166	0.20707	0.905836
ENSG00000133083	DCLK1	protein_coding	doublecortin like kinase 1	1130.92	-0.0588735	0.460937	-0.127726	0.898366	0.999962
ENSG00000284948	AC107959.4	lincRNA		89.5348	0.808374	0.608871	1.32766	0.18429	0.860636
ENSG00000267528	AC008991.1	lincRNA		83.6466	0.217509	0.963738	0.225693	0.82144	0.999962
ENSG00000276538	AC092666.2	unprocessed_pseudogene		1.01153	-10.1291	4.67466	-2.16681	0.0302493	0.281126
ENSG00000007384	RHBDF1	protein_coding	rhomboid 5 homolog 1	18927.5	-0.0421629	0.251351	-0.167745	0.866784	0.999962
ENSG00000282100	HSP90AB4P	processed_pseudogene	heat shock protein 90 alpha family class B member 4, pseudogene	1.31769	-20.2783	4.67466	-4.33791	1.43844e-05	0.000997354
ENSG00000275305	RNA5SP528	rRNA	RNA, 5S ribosomal pseudogene 528	1.09289	-4.08886	4.67466	-0.874685	0.381745	0.999911
ENSG00000181481	RNF135	protein_coding	ring finger protein 135	2278.01	0.228885	0.185578	1.23336	0.21744	0.923859
ENSG00000179846	NKPD1	protein_coding	NTPase KAP family P-loop domain containing 1	30.893	-0.116052	0.920946	-0.126014	0.899721	0.999962
ENSG00000182508	LHFPL1	protein_coding	LHFPL tetraspan subfamily member 1	33.1936	1.896	1.09718	1.72807	0.0839763	0.572283
ENSG00000164687	FABP5	protein_coding	fatty acid binding protein 5	2018.59	0.196056	0.249921	0.784473	0.432763	0.999962
ENSG00000273720	AC091812.2	processed_pseudogene		1.00975	-19.6858	4.64609	-4.23706	2.26468e-05	0.0013271
ENSG00000007312	CD79B	protein_coding	CD79b molecule	1732.33	-0.0801604	0.240351	-0.333513	0.738747	0.999962
ENSG00000255449	AP002812.5	antisense		1.49594	-1.4221	4.62583	-0.307426	0.758519	0.999962
ENSG00000178038	ALS2CL	protein_coding	ALS2 C-terminal like	280.94	0.0344218	0.273929	0.12566	0.900001	0.999962
ENSG00000130600	H19	processed_transcript	H19, imprinted maternally expressed transcript (non-protein coding)	80.9836	0.81978	1.11218	0.737093	0.461066	0.999962
ENSG00000117151	CTBS	protein_coding	chitobiase	831.371	0.0445083	0.266246	0.16717	0.867236	0.999962
ENSG00000256338	RPL41P2	processed_pseudogene	ribosomal protein L41 pseudogene 2	46.6788	0.473765	0.374112	1.26637	0.205379	0.90235
ENSG00000183340	JRKL	protein_coding	JRK like	112.873	-0.488998	0.980839	-0.498551	0.618096	0.999962
ENSG00000131899	LLGL1	protein_coding	LLGL1, scribble cell polarity complex component	20740.6	-0.0473219	0.174742	-0.270809	0.786538	0.999962
ENSG00000204084	INPP5B	protein_coding	inositol polyphosphate-5-phosphatase B	1399.11	0.0296997	0.281634	0.105455	0.916015	0.999962
ENSG00000280184	AL023806.3	TEC		2.47973	-1.15068	3.90589	-0.294602	0.768298	0.999962
ENSG00000060709	RIMBP2	protein_coding	RIMS binding protein 2	107.873	3.3072	2.32043	1.42526	0.154083	0.793839
ENSG00000280040	AC095031.1	TEC		7.35816	-1.70437	3.11834	-0.546564	0.584678	0.999962
ENSG00000236852	BX322784.1	processed_pseudogene		4.09074	-0.600891	2.33194	-0.257679	0.796655	0.999962
ENSG00000144596	GRIP2	protein_coding	glutamate receptor interacting protein 2	1.24889	2.70774	4.60395	0.588134	0.556443	0.999962
ENSG00000163467	TSACC	protein_coding	TSSK6 activating cochaperone	6.8702	2.23205	2.70142	0.826252	0.408661	0.999962
ENSG00000258858	AL583722.4	antisense		1.24965	16.9009	4.62205	3.65658	0.000255598	0.00488415
ENSG00000111218	PRMT8	protein_coding	protein arginine methyltransferase 8	0.446671	-4.44722	4.67466	-0.951345	0.341429	0.989184
ENSG00000153885	KCTD15	protein_coding	potassium channel tetramerization domain containing 15	10550.1	-0.191107	0.170812	-1.11882	0.263219	0.959401
ENSG00000119328	FAM206A	protein_coding	family with sequence similarity 206 member A	145.135	0.0176087	0.6115	0.0287959	0.977027	0.999962
ENSG00000180914	OXTR	protein_coding	oxytocin receptor	16.5057	0.810141	1.74319	0.464745	0.642114	0.999962
ENSG00000152778	IFIT5	protein_coding	interferon induced protein with tetratricopeptide repeats 5	610.126	0.417821	0.423467	0.986669	0.323805	0.989184
ENSG00000188321	ZNF559	protein_coding	zinc finger protein 559	53.2224	0.00786857	1.18724	0.00662759	0.994712	0.999962
ENSG00000068120	COASY	protein_coding	Coenzyme A synthase	18172.6	0.308919	0.217295	1.42166	0.155126	0.796605
ENSG00000173673	HES3	protein_coding	hes family bHLH transcription factor 3	2.13474	0.0179954	4.67466	0.00384957	0.996928	0.999962
ENSG00000071242	RPS6KA2	protein_coding	ribosomal protein S6 kinase A2	32106.7	0.0326046	0.223233	0.146057	0.883877	0.999962
ENSG00000081177	EXD2	protein_coding	exonuclease 3'-5' domain containing 2	1719.98	-0.00528685	0.241649	-0.0218782	0.982545	0.999962
ENSG00000282413	AL133461.1	processed_pseudogene		10.1953	-1.05588	1.41481	-0.746304	0.455484	0.999962
ENSG00000135002	RFK	protein_coding	riboflavin kinase	1410.46	0.0426298	0.270693	0.157484	0.874863	0.999962
ENSG00000142192	APP	protein_coding	amyloid beta precursor protein	14482	0.0566353	0.214854	0.263599	0.792089	0.999962
ENSG00000172817	CYP7B1	protein_coding	cytochrome P450 family 7 subfamily B member 1	69.816	1.06573	1.5792	0.674855	0.499768	0.999962
ENSG00000228470	AL929236.1	sense_overlapping		3.91408	0.886868	4.53285	0.195653	0.844881	0.999962
ENSG00000261796	ISY1-RAB43	protein_coding	ISY1-RAB43 readthrough	429.909	0.0485148	3.88456	0.0124891	0.990035	0.999962
ENSG00000256473	AC087260.1	antisense		0.359147	-18.8706	4.64665	-4.06113	4.88367e-05	0.00195987
ENSG00000259422	AC091100.1	antisense		0.670006	-4.44721	4.67466	-0.951345	0.341429	0.989184
ENSG00000220305	HNRNPH1P1	processed_pseudogene	heterogeneous nuclear ribonucleoprotein H1 pseudogene 1	0.486079	1.03645	4.63083	0.223815	0.822901	0.999962
ENSG00000101052	IFT52	protein_coding	intraflagellar transport 52	714.018	0.194339	0.225915	0.860232	0.389661	0.999962
ENSG00000239219	AC008040.1	antisense		1.24947	-0.502607	4.61666	-0.108868	0.913307	0.999962
ENSG00000185189	NRBP2	protein_coding	nuclear receptor binding protein 2	3140.05	-0.307538	0.298661	-1.02972	0.303141	0.977577
ENSG00000197858	GPAA1	protein_coding	glycosylphosphatidylinositol anchor attachment 1	56239	-0.0873051	0.191983	-0.454753	0.649287	0.999962
ENSG00000196436	NPIPB15	protein_coding	nuclear pore complex interacting protein family member B15	11.2923	1.18585	1.56758	0.756487	0.449357	0.999962
ENSG00000153147	SMARCA5	protein_coding	SWI/SNF related, matrix associated, actin dependent regulator of chromatin, subfamily a, member 5	895.927	-0.162674	0.532123	-0.305709	0.759827	0.999962
ENSG00000255537	AP000708.1	bidirectional_promoter_lncRNA		2.5798	-29.5012	4.62012	-6.38538	1.70974e-10	8.95939e-08
ENSG00000243018	AC005486.1	antisense		6.85123	0.88208	3.34161	0.263968	0.791804	0.999962
ENSG00000213185	FAM24B	protein_coding	family with sequence similarity 24 member B	59.5065	0.118646	0.651321	0.182162	0.855456	0.999962
ENSG00000130702	LAMA5	protein_coding	laminin subunit alpha 5	10643.1	-0.349675	0.250197	-1.3976	0.162234	0.813527
ENSG00000230929	AC099513.1	processed_pseudogene		2.62144	-2.69756	2.99645	-0.90025	0.367987	0.997681
ENSG00000272463	AL357054.4	lincRNA		5.43502	-0.729531	2.88193	-0.253139	0.800161	0.999962
ENSG00000165355	FBXO33	protein_coding	F-box protein 33	1082.21	0.0587064	0.345307	0.170012	0.865001	0.999962
ENSG00000263742	MIR3165	miRNA	microRNA 3165	0.939849	-18.5383	4.64639	-3.98983	6.61207e-05	0.00225786
ENSG00000163879	DNALI1	protein_coding	dynein axonemal light intermediate chain 1	309.116	0.618399	0.292342	2.11533	0.0344022	0.309585
ENSG00000113615	SEC24A	protein_coding	SEC24 homolog A, COPII coat complex component	997.066	-0.0972557	0.386771	-0.251456	0.801462	0.999962
ENSG00000151151	IPMK	protein_coding	inositol polyphosphate multikinase	310.33	0.473048	0.709784	0.666468	0.505112	0.999962
ENSG00000186451	SPATA12	protein_coding	spermatogenesis associated 12	1.75354	-1.30428	4.50231	-0.289691	0.772052	0.999962
ENSG00000168246	UBTD2	protein_coding	ubiquitin domain containing 2	1276.91	0.0973912	0.340827	0.285749	0.77507	0.999962
ENSG00000275325	PDCD6IPP1	transcribed_unprocessed_pseudogene	PDCD6IP pseudogene 1	1.57319	-5.15255	4.67466	-1.10223	0.270361	0.963912
ENSG00000183632	TP53TG3	protein_coding	TP53 target 3	0.507794	-4.0344	4.67466	-0.863036	0.388118	0.999911
ENSG00000242970	AC068522.1	processed_pseudogene		11.3217	0.570568	0.722308	0.789923	0.429572	0.999962
ENSG00000136731	UGGT1	protein_coding	UDP-glucose glycoprotein glucosyltransferase 1	2837.25	-0.11462	0.434868	-0.263574	0.792108	0.999962
ENSG00000272473	AC006273.1	lincRNA		1.52149	-17.2538	4.62584	-3.72988	0.000191571	0.00399398
ENSG00000065802	ASB1	protein_coding	ankyrin repeat and SOCS box containing 1	2362	0.0323747	0.609484	0.0531183	0.957638	0.999962
ENSG00000228217	PNRC2P1	processed_pseudogene	proline rich nuclear receptor coactivator 2 pseudogene 1	15.9003	-0.794148	0.982539	-0.808261	0.41894	0.999962
ENSG00000153767	GTF2E1	protein_coding	general transcription factor IIE subunit 1	444.181	-0.934561	0.368296	-2.53753	0.0111638	0.123559
ENSG00000163882	POLR2H	protein_coding	RNA polymerase II subunit H	2302.2	0.0406874	0.174349	0.233368	0.815476	0.999962
ENSG00000109436	TBC1D9	protein_coding	TBC1 domain family member 9	836.065	-0.0346772	0.425191	-0.0815569	0.934999	0.999962
ENSG00000188385	JAKMIP3	protein_coding	Janus kinase and microtubule interacting protein 3	11.5032	-2.31467	2.99949	-0.771688	0.440299	0.999962
ENSG00000117155	SSX2IP	protein_coding	SSX family member 2 interacting protein	241.227	0.579847	0.899846	0.644384	0.519326	0.999962
ENSG00000252542	SNORD36C	snoRNA	small nucleolar RNA, C/D box 36C	3.33467	-0.0129185	1.53547	-0.00841339	0.993287	0.999962
ENSG00000183723	CMTM4	protein_coding	CKLF like MARVEL transmembrane domain containing 4	3056.06	-0.442505	0.411065	-1.07648	0.281711	0.963912
ENSG00000254860	TMEM9B-AS1	antisense	TMEM9B antisense RNA 1	88.1021	-0.454106	0.821541	-0.55275	0.580435	0.999962
ENSG00000149295	DRD2	protein_coding	dopamine receptor D2	1.07488	4.36434	4.57812	0.953305	0.340435	0.989184
ENSG00000168785	TSPAN5	protein_coding	tetraspanin 5	1150.61	0.0988765	0.228977	0.431819	0.665873	0.999962
ENSG00000265451	AC012447.1	antisense		1.69175	1.68881	4.56515	0.369935	0.711431	0.999962
ENSG00000044574	HSPA5	protein_coding	heat shock protein family A (Hsp70) member 5	19692.7	0.16499	0.317719	0.519298	0.603553	0.999962
ENSG00000107611	CUBN	protein_coding	cubilin	382.595	-1.71734	0.622948	-2.75679	0.00583711	0.0689148
ENSG00000187535	IFT140	protein_coding	intraflagellar transport 140	5738.7	-0.423777	0.265358	-1.597	0.110265	0.670974
ENSG00000161055	SCGB3A1	protein_coding	secretoglobin family 3A member 1	2.86913	1.46497	4.57917	0.31992	0.749029	0.999962
ENSG00000213205	STRADBP1	processed_pseudogene	STE20-related kinase adaptor beta pseudogene 1	15.1288	-0.0120061	0.910949	-0.0131798	0.989484	0.999962
ENSG00000147669	POLR2K	protein_coding	RNA polymerase II subunit K	1016.66	0.204785	0.335261	0.610822	0.541318	0.999962
ENSG00000174514	MFSD4A	protein_coding	major facilitator superfamily domain containing 4A	33.4804	0.783696	1.07116	0.731631	0.464394	0.999962
ENSG00000176998	HCG4	unprocessed_pseudogene	HLA complex group 4 (non-protein coding)	228.817	-0.282654	0.258308	-1.09425	0.273845	0.963912
ENSG00000111144	LTA4H	protein_coding	leukotriene A4 hydrolase	3259.36	-0.00904137	0.278993	-0.0324072	0.974147	0.999962
ENSG00000158887	MPZ	protein_coding	myelin protein zero	182.957	-0.550562	0.658431	-0.836172	0.403058	0.999962
ENSG00000157916	RER1	protein_coding	retention in endoplasmic reticulum sorting receptor 1	13769.8	0.0446775	0.269458	0.165805	0.868311	0.999962
ENSG00000166997	CNPY4	protein_coding	canopy FGF signaling regulator 4	1531.9	0.101658	0.189904	0.53531	0.592435	0.999962
ENSG00000164077	MON1A	protein_coding	MON1 homolog A, secretory trafficking associated	7515.42	0.0822094	0.239246	0.343618	0.731133	0.999962
[truncated: 25,250 more rows]

## Sheet: Condition_miR328_vs_Control
id	gene_name	biotype	description	baseMean	log2FoldChange	lfcSE	stat	pvalue	padj
ENSG00000188026	RILPL1	protein_coding	Rab interacting lysosomal protein like 1	2129.26	-0.554478	0.232997	-2.37976	0.0173238	0.0935319
ENSG00000270112	AC090241.2	processed_transcript		1.01088	0.154219	4.67466	0.0329904	0.973682	0.996331
ENSG00000280143	AP000892.3	TEC		259.121	0.658637	0.590369	1.11564	0.264577	0.622974
ENSG00000078237	TIGAR	protein_coding	TP53 induced glycolysis regulatory phosphatase	929.922	-0.0202001	0.31697	-0.0637286	0.949186	0.996331
ENSG00000158486	DNAH3	protein_coding	dynein axonemal heavy chain 3	0.66452	-0.771877	4.60266	-0.167702	0.866817	0.991308
ENSG00000198242	RPL23A	protein_coding	ribosomal protein L23a	12931.2	0.0506414	0.190919	0.26525	0.790817	0.971992
ENSG00000134108	ARL8B	protein_coding	ADP ribosylation factor like GTPase 8B	1522.43	0.589549	0.445669	1.32284	0.185889	0.510387
ENSG00000263089	AC007114.2	antisense		6.44244	-1.08104	1.88577	-0.573261	0.566468	0.86368
ENSG00000276644	DACH1	protein_coding	dachshund family transcription factor 1	54.8964	4.71687	1.82888	2.5791	0.00990593	0.0590391
ENSG00000240423	LINC00636	lincRNA	long intergenic non-protein coding RNA 636	0.534575	-18.2888	4.64691	-3.9357	8.29542e-05	0.00147547
ENSG00000236040	CHIAP1	unprocessed_pseudogene	chitinase, acidic pseudogene 1	0.478138	-4.25657	4.67466	-0.910561	0.362527	0.713395
ENSG00000167578	RAB4B	protein_coding	RAB4B, member RAS oncogene family	5651.57	-0.537287	0.434278	-1.2372	0.216014	0.557921
ENSG00000275265	AC127002.1	lincRNA		1.22476	-12.9624	4.67466	-2.77291	0.00555573	0.0360782
ENSG00000197557	TTC30A	protein_coding	tetratricopeptide repeat domain 30A	201.453	0.865279	0.593546	1.45781	0.144892	0.439316
ENSG00000233540	DNM3-IT1	sense_intronic	DNM3 intronic transcript 1	1.43117	3.14538	4.59518	0.684495	0.493663	0.812577
ENSG00000102174	PHEX	protein_coding	phosphate regulating endopeptidase homolog X-linked	1.73888	2.88876	4.61005	0.626623	0.530906	0.838707
ENSG00000277224	HIST1H2BF	protein_coding	histone cluster 1 H2B family member f	8.06718	0.079114	2.45196	0.0322656	0.97426	0.996331
ENSG00000166391	MOGAT2	protein_coding	monoacylglycerol O-acyltransferase 2	1.51819	-5.67561	4.67466	-1.21412	0.224701	0.571538
ENSG00000278616	BEND3P3	processed_pseudogene	BEN domain containing 3 pseudogene 3	73.1942	1.46173	0.781907	1.86945	0.0615607	0.246977
ENSG00000070087	PFN2	protein_coding	profilin 2	5526.82	0.510716	0.404596	1.26229	0.206846	0.544574
ENSG00000261765	AC009127.1	sense_intronic		0.335222	-9.10132	4.67466	-1.94695	0.0515411	0.217305
ENSG00000204946	ZNF783	protein_coding	zinc finger family member 783	993.965	-0.387018	0.239459	-1.61622	0.106047	0.360083
ENSG00000279700	AC131212.2	TEC		12.2143	-1.61899	1.53338	-1.05584	0.291044	0.653542
ENSG00000280038	DNM1P41	TEC	dynamin 1 pseudogene 41	4.43439	-2.51164	1.64262	-1.52904	0.126254	0.402988
ENSG00000153561	RMND5A	protein_coding	required for meiotic nuclear division 5 homolog A	1761.57	0.879365	0.405725	2.16739	0.0302051	0.145318
ENSG00000269148	AC092301.1	antisense		10.4127	0.180102	2.3474	0.076724	0.938843	0.996331
ENSG00000235411	AC007041.1	processed_pseudogene		4.72921	1.06201	1.61828	0.656258	0.511658	0.824992
ENSG00000179262	RAD23A	protein_coding	RAD23 homolog A, nucleotide excision repair protein	28064.7	-0.0375353	0.248373	-0.151125	0.879877	0.994455
ENSG00000104833	TUBB4A	protein_coding	tubulin beta 4A class IVa	70740.6	0.477819	0.220619	2.16581	0.0303256	0.145765
ENSG00000006695	COX10	protein_coding	COX10, heme A:farnesyltransferase cytochrome c oxidase assembly factor	789.29	-0.387903	0.217046	-1.7872	0.0739058	0.281619
ENSG00000258630	LINC02292	lincRNA	long intergenic non-protein coding RNA 2292	4.02763	0.154214	4.67466	0.0329894	0.973683	0.996331
ENSG00000214062	RPL7P17	processed_pseudogene	ribosomal protein L7 pseudogene 17	0.311624	16.9444	4.64731	3.64606	0.000266294	0.00289324
ENSG00000095587	TLL2	protein_coding	tolloid like 2	11.3929	2.53945	3.01833	0.841341	0.400157	0.741004
ENSG00000167700	MFSD3	protein_coding	major facilitator superfamily domain containing 3	15700.5	-0.0721663	0.217017	-0.332537	0.739484	0.953329
ENSG00000064601	CTSA	protein_coding	cathepsin A	96147.4	0.14354	0.212886	0.674259	0.500146	0.817497
ENSG00000008517	IL32	protein_coding	interleukin 32	536.886	4.06828	1.19309	3.40987	0.000649945	0.00571301
ENSG00000172137	CALB2	protein_coding	calbindin 2	9.76359	-3.77521	3.561	-1.06015	0.289074	0.651852
ENSG00000229637	PRAC2	protein_coding	prostate cancer susceptibility candidate 2	529.921	-0.430841	0.266906	-1.61421	0.106483	0.360934
ENSG00000236893	ASS1P7	processed_pseudogene	argininosuccinate synthetase 1 pseudogene 7	0.873365	19.1212	4.62091	4.13797	3.50389e-05	0.000847936
ENSG00000070081	NUCB2	protein_coding	nucleobindin 2	263.898	2.25131	0.609677	3.69262	0.000221956	0.00264652
ENSG00000088179	PTPN4	protein_coding	protein tyrosine phosphatase, non-receptor type 4	126.13	1.03374	0.898413	1.15063	0.249884	0.605037
ENSG00000275479	AC087741.2	lincRNA		3.79474	1.54343	2.30246	0.670342	0.50264	0.819482
ENSG00000112309	B3GAT2	protein_coding	beta-1,3-glucuronyltransferase 2	32.6821	-1.92896	1.69993	-1.13473	0.25649	0.613885
ENSG00000158480	SPATA2	protein_coding	spermatogenesis associated 2	3143.78	0.230139	0.18154	1.26771	0.204903	0.541329
ENSG00000197421	GGT3P	transcribed_unprocessed_pseudogene	gamma-glutamyltransferase 3 pseudogene	0.683054	-4.02451	4.67466	-0.860921	0.389282	0.732009
ENSG00000196167	COLCA1	antisense	colorectal cancer associated 1	5.07181	3.84061	4.14474	0.926622	0.354123	0.706842
ENSG00000179833	SERTAD2	protein_coding	SERTA domain containing 2	2068.54	-0.112741	0.241998	-0.465878	0.641303	0.905104
ENSG00000165312	OTUD1	protein_coding	OTU deubiquitinase 1	1030.65	0.428326	0.229956	1.86264	0.0625127	0.249877
ENSG00000159618	ADGRG5	protein_coding	adhesion G protein-coupled receptor G5	27.9642	3.83688	1.25166	3.06543	0.00217355	0.016147
ENSG00000064225	ST3GAL6	protein_coding	ST3 beta-galactoside alpha-2,3-sialyltransferase 6	1298.45	0.386234	0.244206	1.58159	0.113743	0.376092
ENSG00000134709	HOOK1	protein_coding	hook microtubule tethering protein 1	91.7811	3.64707	1.30335	2.79822	0.00513853	0.0337873
ENSG00000057294	PKP2	protein_coding	plakophilin 2	47.3916	4.96458	1.31518	3.77484	0.000160111	0.00213135
ENSG00000213988	ZNF90	protein_coding	zinc finger protein 90	10.9947	0.580121	2.04859	0.283181	0.777038	0.967622
ENSG00000171861	MRM3	protein_coding	mitochondrial rRNA methyltransferase 3	2073.7	0.237316	0.1769	1.34153	0.179749	0.500739
ENSG00000177981	ASB8	protein_coding	ankyrin repeat and SOCS box containing 8	1067.46	0.348337	0.170861	2.03872	0.0414782	0.184589
ENSG00000233614	DDX11L10	transcribed_unprocessed_pseudogene	DEAD/H-box helicase 11 like 10	6.56993	3.38068	4.32456	0.781739	0.434368	0.767481
ENSG00000259659	AC009996.1	sense_intronic		4.80945	-1.0573	2.43958	-0.433393	0.664729	0.917682
ENSG00000120662	MTRF1	protein_coding	mitochondrial translation release factor 1	74.7816	0.643386	0.699099	0.920307	0.357412	0.708919
ENSG00000259952	AC009133.2	antisense		0.178852	-4.39897	4.67466	-0.941025	0.346692	0.702798
ENSG00000225630	MTND2P28	unprocessed_pseudogene	mitochondrially encoded NADH:ubiquinone oxidoreductase core subunit 2 pseudogene 28	82333.3	0.456842	0.244066	1.8718	0.0612346	0.246176
ENSG00000164283	ESM1	protein_coding	endothelial cell specific molecule 1	12.2412	6.91687	3.79559	1.82234	0.0684028	0.266311
ENSG00000013392	RWDD2A	protein_coding	RWD domain containing 2A	132.696	0.687143	0.592435	1.15986	0.246105	0.600441
ENSG00000226688	ENTPD1-AS1	antisense	ENTPD1 antisense RNA 1	108.871	-0.550501	0.627109	-0.877839	0.380031	0.724454
ENSG00000204581	ACOXL-AS1	antisense	ACOXL antisense RNA 1	0.631511	-13.558	4.67466	-2.90031	0.00372798	0.0256784
ENSG00000244265	SIAH2-AS1	antisense	SIAH2 antisense RNA 1	8.77431	-0.649771	2.34285	-0.277342	0.781517	0.969066
ENSG00000166913	YWHAB	protein_coding	tyrosine 3-monooxygenase/tryptophan 5-monooxygenase activation protein beta	9112.39	0.157542	0.362286	0.434855	0.663667	0.917256
ENSG00000272911	AC005696.3	lincRNA		2.69188	-14.2563	4.67466	-3.04971	0.00229065	0.0168971
ENSG00000146700	SSC4D	protein_coding	scavenger receptor cysteine rich family member with 4 domains	82.4017	-0.0734946	0.537214	-0.136807	0.891183	0.995951
ENSG00000130204	TOMM40	protein_coding	translocase of outer mitochondrial membrane 40	12555.9	-0.815114	0.27808	-2.93122	0.00337637	0.0235844
ENSG00000280387	AL109806.1	TEC		2.14151	-0.581927	4.5384	-0.128223	0.897972	0.996331
ENSG00000189099	PRSS48	protein_coding	serine protease 48	0.596736	-3.64344	4.58581	-0.794502	0.426903	0.761601
ENSG00000232879	AL591806.2	processed_pseudogene		0.234305	-5.16757	4.67466	-1.10544	0.268968	0.6287
ENSG00000111863	ADTRP	protein_coding	androgen dependent TFPI regulating protein	6.45664	0.108014	3.82306	0.0282531	0.97746	0.996331
ENSG00000240583	AQP1	protein_coding	aquaporin 1 (Colton blood group)	76.0021	3.3606	0.900854	3.73046	0.00019113	0.00242124
ENSG00000109618	SEPSECS	protein_coding	Sep (O-phosphoserine) tRNA:Sec (selenocysteine) tRNA synthase	166.113	0.863068	0.874593	0.986823	0.32373	0.6825
ENSG00000214866	DCDC2C	protein_coding	doublecortin domain containing 2C	1.46397	-5.65862	4.67466	-1.21049	0.226092	0.572936
ENSG00000279345	Z98885.3	antisense		12.1654	0.467023	1.61856	0.288543	0.772931	0.966431
ENSG00000153015	CWC27	protein_coding	CWC27 spliceosome associated protein homolog	55.6222	1.66934	1.08741	1.53515	0.124748	0.400195
ENSG00000260549	MT1L	transcribed_unprocessed_pseudogene	metallothionein 1L, pseudogene	84.206	-3.47743	1.08261	-3.21208	0.00131776	0.0104262
ENSG00000268234	FKBP4P6	processed_pseudogene	FK506 binding protein 4 pseudogene 6	26.4017	0.398952	0.572897	0.696376	0.486194	0.806659
ENSG00000250210	FO082796.1	unprocessed_pseudogene		0.498891	15	4.6301	3.23968	0.00119666	0.00962088
ENSG00000257246	PHBP19	processed_pseudogene	prohibitin pseudogene 19	1.67154	-1.41727	4.64716	-0.304976	0.760385	0.961692
ENSG00000036448	MYOM2	protein_coding	myomesin 2	25.5273	0.136147	0.760557	0.179009	0.85793	0.989869
ENSG00000164114	MAP9	protein_coding	microtubule associated protein 9	82.89	4.38446	1.34055	3.27066	0.00107298	0.00879326
ENSG00000281091	AL606763.1	lincRNA		1.68111	-0.969928	4.57497	-0.212007	0.832101	0.983539
ENSG00000268895	A1BG-AS1	antisense	A1BG antisense RNA 1	942.349	-0.118235	0.370862	-0.318812	0.749869	0.958001
ENSG00000114861	FOXP1	protein_coding	forkhead box P1	226.795	1.54144	0.707776	2.17787	0.029416	0.142271
ENSG00000224570	AC097063.1	processed_pseudogene		0.208661	-4.79696	4.67466	-1.02616	0.304815	0.665414
ENSG00000179632	MAF1	protein_coding	MAF1 homolog, negative regulator of RNA polymerase III	31177	0.0920303	0.172031	0.534965	0.592674	0.878995
ENSG00000138193	PLCE1	protein_coding	phospholipase C epsilon 1	172.522	6.5264	1.95036	3.34625	0.000819122	0.00695119
ENSG00000240809	AC026877.1	processed_pseudogene		106.904	-0.0889974	0.543773	-0.163667	0.869994	0.992069
ENSG00000152942	RAD17	protein_coding	RAD17 checkpoint clamp loader component	187.892	1.93184	1.80573	1.06984	0.284692	0.647814
ENSG00000158411	MITD1	protein_coding	microtubule interacting and trafficking domain containing 1	148.869	1.14371	0.717592	1.59382	0.110977	0.370137
ENSG00000172667	ZMAT3	protein_coding	zinc finger matrin-type 3	5777.96	0.232271	0.34137	0.680409	0.496246	0.814328
ENSG00000118363	SPCS2	protein_coding	signal peptidase complex subunit 2	2719.54	-0.00678635	0.165751	-0.0409429	0.967341	0.996331
ENSG00000273311	DGCR11	sense_intronic	DiGeorge syndrome critical region gene 11 (non-protein coding)	177.816	-0.769894	0.477787	-1.61137	0.107098	0.362164
ENSG00000135903	PAX3	protein_coding	paired box 3	5077.84	0.0920766	0.208025	0.442622	0.658039	0.914315
ENSG00000121644	DESI2	protein_coding	desumoylating isopeptidase 2	2807.13	0.0578996	0.324663	0.178337	0.858458	0.989987
ENSG00000205362	MT1A	protein_coding	metallothionein 1A	11.4345	-4.96546	2.35363	-2.10971	0.0348837	0.16232
ENSG00000138495	COX17	protein_coding	COX17, cytochrome c oxidase copper chaperone	1653.11	0.517488	0.239469	2.16098	0.030697	0.147316
ENSG00000169992	NLGN2	protein_coding	neuroligin 2	8181.45	-0.343539	0.194178	-1.76919	0.076862	0.289124
ENSG00000101323	HAO1	protein_coding	hydroxyacid oxidase 1	0.475766	-3.95814	4.67466	-0.846722	0.39715	0.73882
ENSG00000127564	PKMYT1	protein_coding	protein kinase, membrane associated tyrosine/threonine 1	16900.1	-0.746987	0.227486	-3.28366	0.00102468	0.00844312
ENSG00000277998	AC107075.1	unprocessed_pseudogene		4.62825	0.92458	1.70308	0.542886	0.587208	0.876209
ENSG00000226086	EIF3LP3	processed_pseudogene	eukaryotic translation initiation factor 3 subunit L pseudogene 3	20.8352	0.0104219	1.1487	0.00907277	0.992761	0.998968
ENSG00000176973	FAM89B	protein_coding	family with sequence similarity 89 member B	15994.1	0.333101	0.272967	1.2203	0.222352	0.567894
ENSG00000159479	MED8	protein_coding	mediator complex subunit 8	1367.65	-0.00797673	0.18324	-0.0435317	0.965278	0.996331
ENSG00000112511	PHF1	protein_coding	PHD finger protein 1	3189.56	0.258347	0.314762	0.820771	0.411777	0.750145
ENSG00000231062	AC103563.2	antisense		2.09518	-1.11158	4.6198	-0.240612	0.809856	0.976911
ENSG00000154511	FAM69A	protein_coding	family with sequence similarity 69 member A	702.175	-0.287231	0.28954	-0.992026	0.321185	0.680981
ENSG00000144504	ANKMY1	protein_coding	ankyrin repeat and MYND domain containing 1	780.421	-0.203734	0.224345	-0.908131	0.363809	0.714122
ENSG00000142507	PSMB6	protein_coding	proteasome subunit beta 6	10811.7	0.688873	0.198345	3.47311	0.000514461	0.00470264
ENSG00000197019	SERTAD1	protein_coding	SERTA domain containing 1	3840.86	-1.18463	0.185602	-6.38266	1.74038e-10	3.57749e-08
ENSG00000164116	GUCY1A1	protein_coding	guanylate cyclase 1 soluble subunit alpha 1	49.4814	5.7675	1.7714	3.25589	0.00113037	0.00919012
ENSG00000273305	AC009237.15	lincRNA		0.973695	-7.62241	4.59909	-1.65737	0.097444	0.341424
ENSG00000250927	MESTP3	processed_pseudogene	mesoderm specific transcript pseudogene 3	0.35767	16.9558	4.64768	3.64822	0.000264063	0.00289324
ENSG00000174013	FBXO45	protein_coding	F-box protein 45	553.307	-0.114323	0.517626	-0.220861	0.825201	0.981488
ENSG00000196704	AMZ2	protein_coding	archaelysin family metallopeptidase 2	1610.28	0.330537	0.289078	1.14342	0.252865	0.609385
ENSG00000259235	AC066612.1	lincRNA		1.42524	15.9489	4.62203	3.45063	0.000559286	0.00503136
ENSG00000238198	AL357055.3	lincRNA		1.67969	1.98501	4.57378	0.433999	0.664289	0.917447
ENSG00000178821	TMEM52	protein_coding	transmembrane protein 52	95.282	-0.0927319	0.517177	-0.179304	0.857699	0.989804
ENSG00000196126	HLA-DRB1	protein_coding	major histocompatibility complex, class II, DR beta 1	170.048	4.10034	1.11522	3.6767	0.000236272	0.00273035
ENSG00000176928	GCNT4	protein_coding	glucosaminyl (N-acetyl) transferase 4, core 2	70.1418	1.51373	0.903181	1.676	0.093738	0.332284
ENSG00000034239	EFCAB1	protein_coding	EF-hand calcium binding domain 1	21.7879	-1.38387	1.07232	-1.29054	0.196863	0.529129
ENSG00000165416	SUGT1	protein_coding	SGT1 homolog, MIS12 kinetochore complex assembly cochaperone	559.177	0.250595	0.427363	0.586376	0.557623	0.857342
ENSG00000254672	AL136146.1	processed_pseudogene		1.24422	-2.02458	4.6203	-0.438192	0.661247	0.915705
ENSG00000213471	TTLL13P	protein_coding	tubulin tyrosine ligase like 13, pseudogene	3.48106	-0.978004	3.40334	-0.287366	0.773832	0.966583
ENSG00000143033	MTF2	protein_coding	metal response element binding transcription factor 2	198.609	0.902558	0.854677	1.05602	0.290958	0.653504
ENSG00000257941	AC011611.5	processed_pseudogene		0.54916	4.82963	4.59981	1.04996	0.293736	0.656084
ENSG00000259956	RBM15B	protein_coding	RNA binding motif protein 15B	13156.6	-0.374272	0.162179	-2.30777	0.0210122	0.109728
ENSG00000177133	LINC00982	antisense	long intergenic non-protein coding RNA 982	4.0496	2.97387	3.75659	0.791643	0.428569	0.762874
ENSG00000213599	SLX1A-SULT1A3	processed_transcript	SLX1A-SULT1A3 readthrough (NMD candidate)	439.728	0.0568007	0.576603	0.0985093	0.921528	0.996331
ENSG00000268140	PCGF7P	processed_pseudogene	polycomb group ring finger 7 pseudogene	31.6479	0.785327	0.866872	0.905932	0.364972	0.715168
ENSG00000278987	AL031009.1	TEC		16.2373	2.04023	1.44848	1.40853	0.158973	0.464352
ENSG00000225352	RPL31P53	processed_pseudogene	ribosomal protein L31 pseudogene 53	1.11668	17.6041	4.64586	3.78921	0.000151125	0.00206727
ENSG00000267601	AC022966.1	antisense		0.698217	2.35252	4.63315	0.507758	0.611623	0.890284
ENSG00000245667	AC006064.1	antisense		6.22572	-0.0606163	2.32418	-0.0260807	0.979193	0.996331
ENSG00000203818	HIST2H3PS2	protein_coding	histone cluster 2 H3 pseudogene 2	44.8317	1.66211	1.13575	1.46345	0.143345	0.436571
ENSG00000196296	ATP2A1	protein_coding	ATPase sarcoplasmic/endoplasmic reticulum Ca2+ transporting 1	67.934	-2.31001	0.702398	-3.28875	0.00100633	0.00831209
ENSG00000145536	ADAMTS16	protein_coding	ADAM metallopeptidase with thrombospondin type 1 motif 16	30.3699	1.66363	1.09982	1.51264	0.130371	0.411548
ENSG00000279123	AC027281.2	TEC		3.82143	0.182647	2.96814	0.0615358	0.950933	0.996331
ENSG00000109805	NCAPG	protein_coding	non-SMC condensin I complex subunit G	335.582	-0.924342	0.907621	-1.01842	0.308477	0.66942
ENSG00000240489	SETP14	processed_pseudogene	SET pseudogene 14	78.6163	0.131926	0.605803	0.21777	0.827608	0.982662
ENSG00000262519	TXNP4	processed_pseudogene	thioredoxin pseudogene 4	5.49077	-0.0892015	1.68522	-0.0529318	0.957786	0.996331
ENSG00000196748	CLPSL2	protein_coding	colipase like 2	0.347348	0.15423	4.67466	0.0329928	0.97368	0.996331
ENSG00000273723	AL139089.1	lincRNA		16.6513	0.626185	1.63702	0.382515	0.70208	0.93692
ENSG00000163975	MELTF	protein_coding	melanotransferrin	97688.4	-0.0830522	0.209919	-0.39564	0.692371	0.932273
ENSG00000270720	AC104785.1	lincRNA		4.29408	3.73304	3.04738	1.225	0.220575	0.565211
ENSG00000127329	PTPRB	protein_coding	protein tyrosine phosphatase, receptor type B	13.1218	-1.13275	2.48205	-0.456377	0.648119	0.909999
ENSG00000262358	AC116914.1	antisense		3.31121	-0.349198	3.35888	-0.103963	0.917199	0.996331
ENSG00000143183	TMCO1	protein_coding	transmembrane and coiled-coil domains 1	1854.97	-0.268561	0.275904	-0.973386	0.330361	0.688528
ENSG00000108774	RAB5C	protein_coding	RAB5C, member RAS oncogene family	21518.2	-0.206258	0.263165	-0.78376	0.433181	0.766876
ENSG00000183696	UPP1	protein_coding	uridine phosphorylase 1	19775.3	-0.329632	0.193094	-1.70711	0.087802	0.317842
ENSG00000235944	ZNF815P	transcribed_unprocessed_pseudogene	zinc finger protein 815, pseudogene	138.014	0.119552	0.416379	0.287122	0.774019	0.966583
ENSG00000228318	AP001610.1	antisense		2.17907	-0.431046	4.61826	-0.0933351	0.925637	0.996331
ENSG00000279859	AC093323.2	TEC		0.557657	-7.29498	4.67466	-1.56054	0.118633	0.38664
ENSG00000269680	AC008760.1	antisense		2.60127	7.01167	4.58866	1.52804	0.126502	0.4035
ENSG00000269113	TRABD2B	protein_coding	TraB domain containing 2B	5.06144	6.26745	4.5409	1.38022	0.167518	0.480241
ENSG00000268442	HAVCR1P1	processed_pseudogene	hepatitis A virus cellular receptor 1 pseudogene 1	0.238469	-4.72762	4.67466	-1.01133	0.311859	0.672457
ENSG00000227879	PSPC1P1	unprocessed_pseudogene	paraspeckle component 1 pseudogene 1	2.77171	0.253945	4.47412	0.0567586	0.954737	0.996331
ENSG00000272512	AL645608.8	lincRNA		27.2783	-3.84581	1.59151	-2.41646	0.0156723	0.0862912
ENSG00000117139	KDM5B	protein_coding	lysine demethylase 5B	1964.89	0.497789	0.287309	1.73259	0.0831681	0.306333
ENSG00000001460	STPG1	protein_coding	sperm tail PG-rich repeat containing 1	1796.34	0.235148	0.251104	0.936456	0.349038	0.703637
ENSG00000268434	AC011530.1	protein_coding		14.1999	-0.946092	1.66707	-0.567519	0.570361	0.866172
ENSG00000265806	MIR4292	miRNA	microRNA 4292	21.6624	-0.0186247	0.774606	-0.024044	0.980817	0.996331
ENSG00000080031	PTPRH	protein_coding	protein tyrosine phosphatase, receptor type H	2217.92	-0.48374	0.22016	-2.19722	0.0280045	0.136976
ENSG00000168300	PCMTD1	protein_coding	protein-L-isoaspartate (D-aspartate) O-methyltransferase domain containing 1	247.064	0.796415	0.461295	1.72648	0.0842619	0.309274
ENSG00000279419	AC004925.1	TEC		4.48336	0.71435	3.82808	0.186608	0.851968	0.988305
ENSG00000145451	GLRA3	protein_coding	glycine receptor alpha 3	10.1736	2.05567	4.57895	0.448939	0.653476	0.912362
ENSG00000268947	AC002128.1	sense_intronic		28.3394	1.17915	1.13507	1.03884	0.298881	0.661237
ENSG00000231982	AC112907.2	unprocessed_pseudogene		20.5182	-1.17846	1.0219	-1.15321	0.248825	0.60358
ENSG00000173702	MUC13	protein_coding	mucin 13, cell surface associated	713.589	4.3911	1.13502	3.86874	0.000109398	0.00171519
ENSG00000258509	AL049870.1	processed_pseudogene		6.3226	-2.24043	1.53231	-1.46212	0.143708	0.437432
ENSG00000227097	RPS28P7	processed_pseudogene	ribosomal protein S28 pseudogene 7	6068.74	-0.0292272	0.224127	-0.130405	0.896246	0.996331
ENSG00000276180	HIST1H4I	protein_coding	histone cluster 1 H4 family member i	120.49	0.720468	0.390817	1.84349	0.0652575	0.257674
ENSG00000106125	MINDY4	protein_coding	MINDY lysine 48 deubiquitinase 4	195.632	-0.809744	1.09022	-0.742737	0.457641	0.785158
ENSG00000076984	MAP2K7	protein_coding	mitogen-activated protein kinase kinase 7	6302.67	-0.0313028	0.256948	-0.121825	0.903037	0.996331
ENSG00000271824	SMIM32	protein_coding	small integral membrane protein 32	31.3792	5.74039	1.50272	3.82	0.000133452	0.00192709
ENSG00000133624	ZNF767P	transcribed_unprocessed_pseudogene	zinc finger family member 767, pseudogene	128.831	0.15336	0.574414	0.266984	0.789481	0.971705
ENSG00000267634	RPL7L1P5	processed_pseudogene	ribosomal protein L7 like 1 pseudogene 5	0.311624	16.9444	4.64731	3.64606	0.000266294	0.00289324
ENSG00000212724	KRTAP2-3	protein_coding	keratin associated protein 2-3	3.21216	2.47606	2.35077	1.0533	0.292203	0.6545
ENSG00000221539	SNORD99	snoRNA	small nucleolar RNA, C/D box 99	3.52339	-2.00991	2.56406	-0.783877	0.433112	0.766809
ENSG00000231305	AC112484.1	antisense		5.63537	-1.8178	2.38424	-0.762424	0.445807	0.775479
ENSG00000160201	U2AF1	protein_coding	U2 small nuclear RNA auxiliary factor 1	2930.54	-0.242147	0.311255	-0.777971	0.436586	0.769355
ENSG00000261654	AL360270.2	sense_overlapping		2.02161	1.13668	4.54491	0.2501	0.80251	0.974549
ENSG00000251615	AC104825.1	lincRNA		29.5188	0.410217	1.11741	0.367113	0.713535	0.942684
ENSG00000125743	SNRPD2	protein_coding	small nuclear ribonucleoprotein D2 polypeptide	4153.02	-0.408233	0.301	-1.35626	0.175018	0.493247
ENSG00000241537	AC134050.1	processed_pseudogene		0.564441	0.154222	4.67466	0.0329911	0.973682	0.996331
ENSG00000220256	AC093802.1	lincRNA		0.444772	-4.20954	4.67466	-0.900501	0.367854	0.717096
ENSG00000212497	RNA5SP465	rRNA	RNA, 5S ribosomal pseudogene 465	0.267107	16.8526	4.64769	3.62603	0.000287812	0.00304212
ENSG00000261840	AC093249.6	antisense		114.241	-0.78405	0.428808	-1.82844	0.0674833	0.263408
ENSG00000234769	WASH4P	unprocessed_pseudogene	WAS protein family homolog 4 pseudogene	655.633	0.49724	0.573571	0.866921	0.385985	0.729182
ENSG00000154258	ABCA9	protein_coding	ATP binding cassette subfamily A member 9	0.40066	16.5795	4.64681	3.56792	0.000359822	0.00357839
ENSG00000261399	AL031710.1	antisense		1.40259	-2.25027	4.60349	-0.488818	0.62497	0.897099
ENSG00000174567	GOLT1A	protein_coding	golgi transport 1A	9.22065	23.4451	3.76335	6.22984	4.66926e-10	8.20856e-08
ENSG00000240877	RN7SL521P	misc_RNA	RNA, 7SL, cytoplasmic 521, pseudogene	12.4531	0.2152	1.10164	0.195345	0.845123	0.986462
ENSG00000278126	AC139768.1	sense_intronic		142.47	-1.1955	0.807814	-1.47992	0.138894	0.428891
ENSG00000009724	MASP2	protein_coding	mannan binding lectin serine peptidase 2	17.7872	0.276996	2.31896	0.119449	0.90492	0.996331
ENSG00000237424	FOXD2-AS1	lincRNA	FOXD2 adjacent opposite strand RNA 1	902.136	-0.237935	0.270649	-0.87913	0.379331	0.723887
ENSG00000105048	TNNT1	protein_coding	troponin T1, slow skeletal type	875.206	-0.891428	0.246483	-3.6166	0.000298502	0.00312361
ENSG00000275591	XKR5	protein_coding	XK related 5	77.9041	-0.613011	1.04602	-0.586039	0.557849	0.857346
ENSG00000134072	CAMK1	protein_coding	calcium/calmodulin dependent protein kinase I	1154.72	-0.693798	0.263434	-2.63367	0.00844667	0.0517335
ENSG00000205899	BHLHA9	protein_coding	basic helix-loop-helix family member a9	5.38465	-18.0921	4.10949	-4.40252	1.07002e-05	0.000362256
ENSG00000005187	ACSM3	protein_coding	acyl-CoA synthetase medium chain family member 3	21.6084	1.44971	2.24807	0.64487	0.519011	0.830008
ENSG00000147324	MFHAS1	protein_coding	malignant fibrous histiocytoma amplified sequence 1	1868.35	-0.138266	0.243881	-0.56694	0.570755	0.866531
ENSG00000178075	GRAMD1C	protein_coding	GRAM domain containing 1C	47.5215	0.854804	0.794957	1.07528	0.282248	0.645086
ENSG00000103175	WFDC1	protein_coding	WAP four-disulfide core domain 1	15907.2	-2.65292	0.429622	-6.17501	6.61612e-10	1.09262e-07
ENSG00000108443	RPS6KB1	protein_coding	ribosomal protein S6 kinase B1	289.97	0.43663	0.565802	0.7717	0.440292	0.771693
ENSG00000272734	ADIRF-AS1	processed_transcript	ADIRF antisense RNA 1	164.189	0.31284	0.390065	0.80202	0.422541	0.758032
ENSG00000233006	MIR3936HG	processed_transcript	MIR3936 host gene	22.4901	1.42873	0.875808	1.63133	0.10282	0.352998
ENSG00000152049	KCNE4	protein_coding	potassium voltage-gated channel subfamily E regulatory subunit 4	4539.48	0.00426145	0.209122	0.0203778	0.983742	0.996621
ENSG00000230707	AL589987.1	processed_pseudogene		87.5984	-0.441585	0.500606	-0.8821	0.377723	0.72325
ENSG00000275017	AL353748.2	processed_pseudogene		1.46472	-0.147159	4.62094	-0.0318461	0.974595	0.996331
ENSG00000255153	TOLLIP-AS1	antisense	TOLLIP antisense RNA 1 (head to head)	281.906	0.631071	0.34815	1.81264	0.0698871	0.270378
ENSG00000261663	AC009065.8	antisense		44.8908	-0.352324	1.15479	-0.305097	0.760292	0.961692
ENSG00000249996	AC106786.2	antisense		1.47572	-0.833054	4.57003	-0.182287	0.855358	0.98905
ENSG00000253829	AC067817.2	antisense		1.38698	3.42579	4.58456	0.747245	0.454916	0.782823
ENSG00000282041	Z82244.1	lincRNA		1.85123	0.304258	4.6187	0.0658752	0.947477	0.996331
ENSG00000175309	PHYKPL	protein_coding	5-phosphohydroxy-L-lysine phospho-lyase	1430.38	0.25401	0.21826	1.1638	0.244506	0.598611
ENSG00000264438	RN7SL560P	misc_RNA	RNA, 7SL, cytoplasmic 560, pseudogene	0.325326	-4.61459	4.67466	-0.987149	0.323569	0.682267
ENSG00000232004	CAP1P2	processed_pseudogene	CAP1 pseudogene 2	112.535	0.0676796	0.539786	0.125382	0.900221	0.996331
ENSG00000231203	KRT8P10	processed_pseudogene	keratin 8 pseudogene 10	11.594	0.810786	1.14091	0.710648	0.477302	0.801589
ENSG00000011052	NME1-NME2	protein_coding	NME1-NME2 readthrough	6907.24	-0.520813	1.44697	-0.359933	0.718897	0.945198
ENSG00000110395	CBL	protein_coding	Cbl proto-oncogene	2767.14	-0.624953	0.531011	-1.17691	0.239231	0.591276
ENSG00000112305	SMAP1	protein_coding	small ArfGAP 1	528.895	0.257888	0.454135	0.567865	0.570126	0.865999
ENSG00000254131	AC093367.1	processed_pseudogene		1.77402	-4.94133	4.67466	-1.05704	0.290491	0.653005
ENSG00000128973	CLN6	protein_coding	CLN6, transmembrane ER protein	29563.9	-0.901928	0.176151	-5.1202	3.05218e-07	1.98494e-05
ENSG00000107018	RLN1	protein_coding	relaxin 1	5.11546	-3.68783	3.48193	-1.05913	0.289538	0.652367
ENSG00000270587	AC046185.2	processed_pseudogene		27.6327	-0.881873	1.20292	-0.733113	0.46349	0.790267
ENSG00000260799	KRT8P50	processed_pseudogene	keratin 8 pseudogene 50	2.81853	-17.9218	4.64793	-3.85586	0.000115322	0.00176341
ENSG00000241429	EEF1A1P25	processed_pseudogene	eukaryotic translation elongation factor 1 alpha 1 pseudogene 25	104.625	-0.01838	0.431364	-0.0426089	0.966013	0.996331
ENSG00000260743	AC007823.1	lincRNA		2.93983	-5.87999	4.5897	-1.28113	0.200149	0.535112
ENSG00000282772	AL358790.1	antisense		13.0244	-0.185965	1.85031	-0.100505	0.919944	0.996331
ENSG00000167880	EVPL	protein_coding	envoplakin	12.3536	2.91062	3.35433	0.867721	0.385547	0.728758
ENSG00000139656	SMIM2	protein_coding	small integral membrane protein 2	0.440978	6.59843	4.61382	1.43015	0.152675	0.453407
ENSG00000139988	RDH12	protein_coding	retinol dehydrogenase 12 (all-trans/9-cis/11-cis)	9.60427	-4.72078	1.93666	-2.43759	0.0147857	0.0823242
ENSG00000104998	IL27RA	protein_coding	interleukin 27 receptor subunit alpha	554.603	-0.927928	0.260153	-3.56686	0.000361291	0.00359038
ENSG00000230806	SRGAP2-AS1	antisense	SRGAP2 antisense RNA 1	0.566212	1.39422	4.65583	0.299457	0.764591	0.963661
ENSG00000082068	WDR70	protein_coding	WD repeat domain 70	302.483	0.105866	0.434306	0.24376	0.807417	0.976013
ENSG00000235204	AL162724.2	antisense		3.45851	-3.14231	3.44618	-0.911825	0.361861	0.713395
ENSG00000136319	TTC5	protein_coding	tetratricopeptide repeat domain 5	1275.32	-0.576911	0.229798	-2.51052	0.0120555	0.069377
ENSG00000235795	AC093157.2	antisense		2.27706	-2.92245	4.59734	-0.635682	0.524984	0.835053
ENSG00000153044	CENPH	protein_coding	centromere protein H	204.328	-0.469519	0.509732	-0.921108	0.356994	0.708347
ENSG00000255774	AP000439.2	lincRNA		0.83076	-14.0804	4.67466	-3.01207	0.00259469	0.0187939
ENSG00000226544	RPL7P22	processed_pseudogene	ribosomal protein L7 pseudogene 22	8.47898	-1.51033	1.06007	-1.42474	0.154232	0.456264
ENSG00000249915	PDCD6	protein_coding	programmed cell death 6	4977	0.0603326	0.158119	0.381565	0.702784	0.937263
ENSG00000079819	EPB41L2	protein_coding	erythrocyte membrane protein band 4.1 like 2	521.878	-0.0846651	0.549384	-0.154109	0.877524	0.993899
ENSG00000197927	C2orf27A	transcribed_unprocessed_pseudogene	chromosome 2 open reading frame 27A	8.16619	3.5736	2.69766	1.3247	0.18527	0.509531
ENSG00000143793	C1orf35	protein_coding	chromosome 1 open reading frame 35	2698.93	-0.102037	0.174622	-0.584328	0.559	0.857584
ENSG00000134333	LDHA	protein_coding	lactate dehydrogenase A	20436.8	0.537459	0.253098	2.12352	0.0337104	0.157858
ENSG00000277250	RF00017	misc_RNA		0.30393	0.154232	4.67466	0.0329932	0.97368	0.996331
ENSG00000114062	UBE3A	protein_coding	ubiquitin protein ligase E3A	929.823	0.263966	0.381962	0.691079	0.489516	0.809296
ENSG00000119772	DNMT3A	protein_coding	DNA methyltransferase 3 alpha	2730.99	-0.245612	0.219166	-1.12067	0.26243	0.619986
ENSG00000213509	PPIAP16	processed_pseudogene	peptidylprolyl isomerase A pseudogene 16	1.49437	-1.13375	2.05068	-0.552866	0.580355	0.872673
ENSG00000138735	PDE5A	protein_coding	phosphodiesterase 5A	193.215	0.439091	0.730614	0.600989	0.547848	0.849986
ENSG00000274021	AC024909.2	antisense		279.219	1.41634	0.822772	1.72143	0.0851726	0.311442
ENSG00000271180	AL158801.4	processed_pseudogene		4.30603	-2.95237	2.43785	-1.21106	0.225873	0.5729
ENSG00000280186	AL359258.3	TEC		20.897	0.374777	1.67632	0.223571	0.823091	0.980759
ENSG00000131845	ZNF304	protein_coding	zinc finger protein 304	318.249	-0.305893	0.326111	-0.938005	0.348242	0.703637
ENSG00000196655	TRAPPC4	protein_coding	trafficking protein particle complex 4	2637.61	0.253161	0.204325	1.23902	0.21534	0.557067
ENSG00000054598	FOXC1	protein_coding	forkhead box C1	81.7615	0.0353882	0.390293	0.090671	0.927754	0.996331
ENSG00000166896	ATP23	protein_coding	ATP23 metallopeptidase and ATP synthase assembly factor homolog	73.3517	-3.97069	1.64339	-2.41615	0.0156854	0.0863457
ENSG00000280007	AC008079.2	antisense		97.3777	0.346647	0.429006	0.808024	0.419077	0.755703
ENSG00000180447	GAS1	protein_coding	growth arrest specific 1	1833.53	0.36468	0.204642	1.78204	0.0747423	0.283668
ENSG00000185839	AL035411.1	processed_pseudogene		132.191	-0.365232	0.378763	-0.964276	0.334907	0.693214
ENSG00000257151	PWAR6	lincRNA	Prader Willi/Angelman region RNA 6	21.727	-0.014026	2.23652	-0.00627137	0.994996	0.99975
ENSG00000228696	ARL17B	protein_coding	ADP ribosylation factor like GTPase 17B	61.9262	0.928017	1.21152	0.765994	0.44368	0.77391
ENSG00000118094	TREH	protein_coding	trehalase	0.414292	0.153552	4.6746	0.0328481	0.973796	0.996331
ENSG00000245750	DRAIC	lincRNA	downregulated RNA in cancer, inhibitor of cell invasion and migration	4.06435	0.49193	4.516	0.10893	0.913258	0.996331
ENSG00000133958	UNC79	protein_coding	unc-79 homolog, NALCN channel complex subunit	43.6203	4.70676	1.35424	3.47558	0.000509745	0.00466807
ENSG00000146535	GNA12	protein_coding	G protein subunit alpha 12	14578.4	-0.0300647	0.179745	-0.167263	0.867163	0.991579
ENSG00000168306	ACOX2	protein_coding	acyl-CoA oxidase 2	0.447852	-1.04025	4.63936	-0.224223	0.822584	0.980602
ENSG00000064102	INTS13	protein_coding	integrator complex subunit 13	240.867	1.06328	0.883404	1.20361	0.228739	0.576961
ENSG00000168070	MAJIN	protein_coding	membrane anchored junction protein	0.637761	-4.22159	4.67466	-0.903079	0.366484	0.716231
ENSG00000148426	PROSER2	protein_coding	proline and serine rich 2	621.355	-0.214129	0.273128	-0.783988	0.433047	0.766809
ENSG00000115685	PPP1R7	protein_coding	protein phosphatase 1 regulatory subunit 7	1914.87	-0.203853	0.136883	-1.48925	0.136423	0.423867
ENSG00000122566	HNRNPA2B1	protein_coding	heterogeneous nuclear ribonucleoprotein A2/B1	11320.1	0.132883	0.297947	0.445994	0.655602	0.913224
ENSG00000255248	MIR100HG	processed_transcript	mir-100-let-7a-2-mir-125b-1 cluster host gene	41.024	1.31139	0.925035	1.41767	0.156288	0.459456
ENSG00000130649	CYP2E1	protein_coding	cytochrome P450 family 2 subfamily E member 1	7.52761	-0.0434895	3.18082	-0.0136724	0.989091	0.998129
ENSG00000255535	AP003041.2	processed_pseudogene		2.18577	-4.25674	4.67466	-0.910599	0.362507	0.713395
ENSG00000100029	PES1	protein_coding	pescadillo ribosomal biogenesis factor 1	12933.7	-0.172234	0.205565	-0.837857	0.402111	0.742856
ENSG00000259248	USP3-AS1	antisense	USP3 antisense RNA 1	3.57921	-1.32434	3.2823	-0.403479	0.686596	0.929464
ENSG00000228929	RPS13P2	processed_pseudogene	ribosomal protein S13 pseudogene 2	378.527	0.0340714	0.298386	0.114186	0.909091	0.996331
ENSG00000119471	HSDL2	protein_coding	hydroxysteroid dehydrogenase like 2	695.219	-0.0150439	0.508732	-0.0295714	0.976409	0.996331
ENSG00000132300	PTCD3	protein_coding	pentatricopeptide repeat domain 3	1409.33	0.0279586	0.395948	0.0706118	0.943707	0.996331
ENSG00000175894	TSPEAR	protein_coding	thrombospondin type laminin G domain and EAR repeats	3.44787	0.332147	4.62602	0.0717997	0.942761	0.996331
ENSG00000126698	DNAJC8	protein_coding	DnaJ heat shock protein family (Hsp40) member C8	1159.84	-0.480069	0.420987	-1.14034	0.254144	0.611009
ENSG00000164366	CCDC127	protein_coding	coiled-coil domain containing 127	2055.58	0.298142	0.206138	1.44632	0.148087	0.445095
ENSG00000229107	ABHD17AP4	processed_pseudogene	abhydrolase domain containing 17A pseudogene P4	484.022	-1.46389	1.30107	-1.12515	0.260527	0.61838
ENSG00000213777	AC011487.1	transcribed_processed_pseudogene		4.97835	-1.34579	3.61512	-0.372267	0.709694	0.940678
ENSG00000279525	AC002451.2	TEC		1.26517	-10.4297	4.67466	-2.23111	0.025674	0.128154
ENSG00000207041	RNU6-3P	snRNA	RNA, U6 small nuclear 3, pseudogene	1.80546	-1.63863	2.13698	-0.766797	0.443202	0.773674
ENSG00000162076	FLYWCH2	protein_coding	FLYWCH family member 2	3203.29	-0.799401	0.199072	-4.01564	5.9285e-05	0.00120257
ENSG00000182667	NTM	protein_coding	neurotrimin	260.864	0.434758	0.495013	0.878275	0.379794	0.724364
ENSG00000130520	LSM4	protein_coding	LSM4 homolog, U6 small nuclear RNA and mRNA degradation associated	24877.2	-0.483921	0.269635	-1.79473	0.0726973	0.278327
ENSG00000229117	RPL41	protein_coding	ribosomal protein L41	7850.65	-1.32209	0.54096	-2.44398	0.0145263	0.0810125
ENSG00000225675	LINC01771	lincRNA	long intergenic non-protein coding RNA 1771	0.765709	-16.8809	4.62598	-3.64914	0.000263115	0.00289324
ENSG00000227372	TP73-AS1	transcribed_unitary_pseudogene	TP73 antisense RNA 1	2790.1	0.128192	0.293378	0.436953	0.662146	0.916363
ENSG00000218358	RAET1K	transcribed_unprocessed_pseudogene	retinoic acid early transcript 1K pseudogene	0.836803	-4.57491	4.67466	-0.978661	0.327748	0.686192
ENSG00000057149	SERPINB3	protein_coding	serpin family B member 3	3.57102	0.881669	4.61784	0.190927	0.848583	0.987044
ENSG00000184961	RPL7AP49	processed_pseudogene	ribosomal protein L7a pseudogene 49	1.20294	0.170688	3.81775	0.044709	0.964339	0.996331
ENSG00000100628	ASB2	protein_coding	ankyrin repeat and SOCS box containing 2	1695.48	-0.839062	0.206171	-4.06974	4.70652e-05	0.00101151
ENSG00000243250	RPS6P16	processed_pseudogene	ribosomal protein S6 pseudogene 16	0.485708	-1.21903	4.6369	-0.262897	0.79263	0.972713
ENSG00000231795	ITCH-IT1	sense_intronic	ITCH intronic transcript 1	0.279268	0.107953	4.66589	0.0231367	0.981541	0.996331
ENSG00000173272	MZT2A	protein_coding	mitotic spindle organizing protein 2A	10336	-0.464385	0.156662	-2.96425	0.00303427	0.0215202
ENSG00000131508	UBE2D2	protein_coding	ubiquitin conjugating enzyme E2 D2	7243.32	0.0193939	0.14747	0.131511	0.895371	0.996331
ENSG00000075914	EXOSC7	protein_coding	exosome component 7	1909.93	-0.170313	0.219315	-0.776568	0.437414	0.769505
ENSG00000132031	MATN3	protein_coding	matrilin 3	64.7842	-3.99243	1.32172	-3.02064	0.00252238	0.0183286
ENSG00000267080	ASB16-AS1	antisense	ASB16 antisense RNA 1	488.373	-0.157469	0.399692	-0.393975	0.693599	0.932858
ENSG00000197444	OGDHL	protein_coding	oxoglutarate dehydrogenase like	37.9606	5.56504	1.53089	3.63517	0.000277802	0.0029825
ENSG00000007952	NOX1	protein_coding	NADPH oxidase 1	3.92016	-0.437135	3.50287	-0.124793	0.900687	0.996331
ENSG00000249908	BRD9P2	unprocessed_pseudogene	bromodomain containing 9 pseudogene 2	2.49358	-0.291371	3.58664	-0.0812379	0.935253	0.996331
ENSG00000158483	FAM86C1	protein_coding	family with sequence similarity 86 member C1	746.142	0.127494	0.338665	0.376462	0.706574	0.938825
ENSG00000212961	HNRNPA1P40	processed_pseudogene	heterogeneous nuclear ribonucleoprotein A1 pseudogene 40	1.06164	-13.8339	4.67466	-2.95934	0.00308303	0.021815
ENSG00000171806	METTL18	protein_coding	methyltransferase like 18	80.2502	-0.118333	0.970804	-0.121892	0.902984	0.996331
ENSG00000165195	PIGA	protein_coding	phosphatidylinositol glycan anchor biosynthesis class A	447.888	-0.644328	0.33059	-1.94902	0.0512926	0.216559
ENSG00000070444	MNT	protein_coding	MAX network transcriptional repressor	5490.47	-0.263992	0.19385	-1.36184	0.173249	0.490836
ENSG00000218227	AC136632.1	processed_pseudogene		85.7666	0.349742	0.30857	1.13343	0.257034	0.614283
ENSG00000066697	MSANTD3	protein_coding	Myb/SANT DNA binding domain containing 3	2384.81	0.0243731	0.143849	0.169435	0.865455	0.990848
ENSG00000265574	WDR45BP1	processed_pseudogene	WD repeat domain 45B pseudogene 1	40.2851	0.693088	0.584286	1.18621	0.235538	0.586136
ENSG00000227329	AL139396.1	processed_pseudogene		0.430976	-18.3969	4.64638	-3.9594	7.51373e-05	0.00139755
ENSG00000237390	AL139130.1	lincRNA		1.14584	12.23	4.6462	2.63226	0.00848198	0.0519033
ENSG00000083444	PLOD1	protein_coding	procollagen-lysine,2-oxoglutarate 5-dioxygenase 1	56723.9	-0.449027	0.204449	-2.19628	0.0280718	0.137231
ENSG00000182613	OR2V2	protein_coding	olfactory receptor family 2 subfamily V member 2	0.962105	4.16373	4.58226	0.908663	0.363528	0.713893
ENSG00000247775	SNCA-AS1	antisense	SNCA antisense RNA 1	2.26196	-2.90712	4.63437	-0.627297	0.530464	0.838531
ENSG00000246526	LINC002481	lincRNA	long intergenic non-protein coding RNA 2481	0.593029	-5.66084	4.67466	-1.21096	0.22591	0.5729
ENSG00000255458	AC108471.2	lincRNA		7.60942	0.499154	3.30092	0.151217	0.879805	0.994455
ENSG00000078618	NRDC	protein_coding	nardilysin convertase	2221.19	0.441475	0.393664	1.12145	0.262096	0.61963
ENSG00000145982	FARS2	protein_coding	phenylalanyl-tRNA synthetase 2, mitochondrial	1633.3	0.00234772	0.194078	0.0120968	0.990348	0.998422
ENSG00000274979	AC020656.2	lincRNA		1.25914	0.15421	4.67466	0.0329885	0.973684	0.996331
ENSG00000181381	DDX60L	protein_coding	DExD/H-box 60 like	233.424	0.270146	0.346057	0.780642	0.435013	0.767808
ENSG00000112303	VNN2	protein_coding	vanin 2	57.3325	4.04716	1.89744	2.13295	0.0329285	0.155302
ENSG00000142552	RCN3	protein_coding	reticulocalbin 3	2446.88	-1.2733	0.276944	-4.59767	4.27249e-06	0.000175069
ENSG00000223663	NDUFB4P8	processed_pseudogene	NADH:ubiquinone oxidoreductase subunit B4 pseudogene 8	2.62129	1.9909	4.29271	0.463788	0.6428	0.906279
ENSG00000139613	SMARCC2	protein_coding	SWI/SNF related, matrix associated, actin dependent regulator of chromatin subfamily c member 2	5681.58	-0.640702	0.192728	-3.32438	0.000886155	0.00744124
ENSG00000149923	PPP4C	protein_coding	protein phosphatase 4 catalytic subunit	18089.2	-0.146052	0.177993	-0.820549	0.411903	0.750145
ENSG00000231434	AL365440.1	processed_pseudogene		1.64744	1.95281	4.58348	0.426055	0.670068	0.920668
ENSG00000149925	ALDOA	protein_coding	aldolase, fructose-bisphosphate A	419396	0.294483	0.206738	1.42443	0.154323	0.456271
ENSG00000272079	AC004233.3	lincRNA		11.1061	5.7275	2.91294	1.96623	0.0492724	0.20976
ENSG00000143882	ATP6V1C2	protein_coding	ATPase H+ transporting V1 subunit C2	87.8178	-1.74411	0.615474	-2.83376	0.00460035	0.0307922
ENSG00000271321	CTAGE6	protein_coding	CTAGE family member 6	8.5048	1.50245	1.07904	1.39239	0.163804	0.473421
ENSG00000144959	NCEH1	protein_coding	neutral cholesterol ester hydrolase 1	583.017	0.600346	0.475601	1.26229	0.206845	0.544574
ENSG00000197893	NRAP	protein_coding	nebulin related anchoring protein	3.15377	-2.19232	4.59273	-0.477346	0.633116	0.901088
ENSG00000159733	ZFYVE28	protein_coding	zinc finger FYVE-type containing 28	3887.63	-0.153329	0.219876	-0.697343	0.485588	0.806464
ENSG00000223864	NPM1P19	processed_pseudogene	nucleophosmin 1 pseudogene 19	0.687886	-0.722512	4.35847	-0.165772	0.868336	0.991988
ENSG00000117602	RCAN3	protein_coding	RCAN family member 3	1745.19	0.0685542	0.278228	0.246396	0.805376	0.975667
ENSG00000173276	ZBTB21	protein_coding	zinc finger and BTB domain containing 21	395.553	0.773106	0.513167	1.50654	0.131929	0.414353
ENSG00000139531	SUOX	protein_coding	sulfite oxidase	3265.03	0.200674	0.509903	0.393552	0.693912	0.932948
ENSG00000163376	KBTBD8	protein_coding	kelch repeat and BTB domain containing 8	21.1675	-0.959425	1.20939	-0.793315	0.427594	0.762185
ENSG00000101236	RNF24	protein_coding	ring finger protein 24	2443.58	0.14396	0.292889	0.491516	0.623062	0.896008
ENSG00000113360	DROSHA	protein_coding	drosha ribonuclease III	1214.62	-0.161397	0.326072	-0.494974	0.620619	0.895264
ENSG00000099385	BCL7C	protein_coding	BCL tumor suppressor 7C	8523.57	-0.371346	0.137265	-2.70533	0.00682374	0.0430816
ENSG00000161904	LEMD2	protein_coding	LEM domain containing 2	9760.61	0.40261	0.194642	2.06847	0.0385961	0.174871
ENSG00000179111	HES7	protein_coding	hes family bHLH transcription factor 7	373.913	-0.733002	0.360787	-2.03167	0.0421867	0.187131
ENSG00000170325	PRDM10	protein_coding	PR/SET domain 10	434.747	0.00733677	0.57437	0.0127736	0.989808	0.99827
ENSG00000214646	AC104758.1	transcribed_unprocessed_pseudogene		0.679581	0.0127767	4.64148	0.00275272	0.997804	0.99975
ENSG00000104142	VPS18	protein_coding	VPS18, CORVET/HOPS core subunit	60960.7	0.0725099	0.208745	0.347361	0.72832	0.948979
ENSG00000261504	LINC01686	lincRNA	long intergenic non-protein coding RNA 1686	9.8399	2.04368	2.08243	0.981395	0.326398	0.685104
ENSG00000230107	AL022316.1	lincRNA		0.933942	0.154237	4.67466	0.0329942	0.973679	0.996331
ENSG00000156467	UQCRB	protein_coding	ubiquinol-cytochrome c reductase binding protein	1944.1	0.395427	0.245984	1.60753	0.107938	0.363929
ENSG00000256566	AL049650.1	protein_coding		9.22028	1.5971	2.24392	0.711746	0.476622	0.801152
ENSG00000224870	AL391244.1	processed_transcript		479.093	-1.17265	0.516968	-2.26833	0.0233093	0.118832
ENSG00000204308	RNF5	protein_coding	ring finger protein 5	898.752	-0.393876	0.224219	-1.75666	0.0789764	0.295041
ENSG00000169856	ONECUT1	protein_coding	one cut homeobox 1	20.2099	0.101265	1.85215	0.0546741	0.956398	0.996331
ENSG00000168939	SPRY3	protein_coding	sprouty RTK signaling antagonist 3	26.8566	-2.94752	2.1017	-1.40245	0.160782	0.467821
ENSG00000154447	SH3RF1	protein_coding	SH3 domain containing ring finger 1	654.168	-0.142138	0.35243	-0.40331	0.68672	0.929534
ENSG00000260281	ITFG1-AS1	antisense	ITFG1 antisense RNA 1	0.9994	-20.1368	4.62598	-4.35299	1.34295e-05	0.000427002
ENSG00000132964	CDK8	protein_coding	cyclin dependent kinase 8	451.772	0.465088	0.336676	1.38141	0.167153	0.479396
ENSG00000214612	RPS19P1	processed_pseudogene	ribosomal protein S19 pseudogene 1	2.25407	1.59347	3.76733	0.422969	0.672318	0.921528
ENSG00000183570	PCBP3	protein_coding	poly(rC) binding protein 3	196.395	1.14892	0.458035	2.50837	0.0121289	0.0697043
ENSG00000101680	LAMA1	protein_coding	laminin subunit alpha 1	2965.48	-0.478144	0.304496	-1.57028	0.11635	0.382208
ENSG00000111785	RIC8B	protein_coding	RIC8 guanine nucleotide exchange factor B	375.998	0.265079	0.299684	0.884531	0.37641	0.721953
ENSG00000187325	TAF9B	protein_coding	TATA-box binding protein associated factor 9b	578.956	0.287055	0.603254	0.475844	0.634185	0.901344
ENSG00000261279	ULK4P1	transcribed_unprocessed_pseudogene	ULK4 pseudogene 1	1.91668	0.595474	2.39266	0.248875	0.803457	0.974904
ENSG00000173846	PLK3	protein_coding	polo like kinase 3	2171.34	-1.06015	0.198912	-5.32974	9.83546e-08	8.07249e-06
ENSG00000168303	MPLKIP	protein_coding	M-phase specific PLK1 interacting protein	1858.48	0.504823	0.169288	2.98204	0.00286336	0.0204572
ENSG00000133027	PEMT	protein_coding	phosphatidylethanolamine N-methyltransferase	8546.9	0.0537019	0.219842	0.244274	0.807018	0.975902
ENSG00000126895	AVPR2	protein_coding	arginine vasopressin receptor 2	5.04432	-0.759153	3.61002	-0.210291	0.833441	0.983583
ENSG00000126562	WNK4	protein_coding	WNK lysine deficient protein kinase 4	41.802	-0.558058	0.611616	-0.912433	0.361541	0.713214
ENSG00000260628	AC142381.3	transcribed_unprocessed_pseudogene		12.1858	5.62106	2.17217	2.58776	0.00966028	0.057828
ENSG00000221164	SNORA11F	snoRNA	small nucleolar RNA, H/ACA box 11F	3.85687	-2.03601	3.28459	-0.619868	0.535345	0.841928
ENSG00000082515	MRPL22	protein_coding	mitochondrial ribosomal protein L22	817.898	-0.250521	0.250244	-1.00111	0.316776	0.678004
ENSG00000214027	ARPC3P5	processed_pseudogene	actin related protein 2/3 complex subunit 3 pseudogene 5	6.26453	1.99435	1.97651	1.00903	0.312962	0.673717
ENSG00000219951	AL391416.1	processed_pseudogene		2.1103	-1.3807	1.83236	-0.753506	0.451146	0.779755
ENSG00000130287	NCAN	protein_coding	neurocan	2.15887	-0.144751	4.61819	-0.0313437	0.974995	0.996331
ENSG00000232412	AL121601.1	lincRNA		0.661412	11.2069	4.64751	2.41137	0.0158929	0.0872763
ENSG00000279069	AC015813.5	TEC		182.586	-0.105926	0.492615	-0.215027	0.829746	0.983304
ENSG00000153208	MERTK	protein_coding	MER proto-oncogene, tyrosine kinase	175.604	-0.854548	0.706703	-1.2092	0.226585	0.573544
ENSG00000269444	AC011491.2	sense_overlapping		2.85018	-4.61352	3.91059	-1.17975	0.2381	0.589841
ENSG00000228502	EEF1A1P11	processed_pseudogene	eukaryotic translation elongation factor 1 alpha 1 pseudogene 11	2172.3	0.532532	0.257355	2.06925	0.0385223	0.174685
ENSG00000270015	AC087481.3	sense_intronic		44.6477	-0.220724	0.899921	-0.24527	0.806247	0.975824
ENSG00000259474	AC027228.1	antisense		0.392468	-4.14833	4.67466	-0.887409	0.374859	0.721009
ENSG00000135905	DOCK10	protein_coding	dedicator of cytokinesis 10	212.519	0.377881	0.686543	0.550411	0.582037	0.873708
ENSG00000117682	DHDDS	protein_coding	dehydrodolichyl diphosphate synthase subunit	6380.86	-0.135808	0.170888	-0.794719	0.426777	0.761475
ENSG00000267348	GEMIN7-AS1	antisense	GEMIN7 antisense RNA 1	49.547	-0.206828	0.882219	-0.234441	0.814643	0.978584
ENSG00000227719	AC006042.1	antisense		0.746157	-0.745651	4.63456	-0.160889	0.872181	0.992746
ENSG00000235802	HCFC1-AS1	antisense	HCFC1 antisense RNA 1	2.39788	0.760945	4.53473	0.167804	0.866738	0.991259
ENSG00000251477	AC114322.1	processed_pseudogene		0.433768	-4.81636	4.67466	-1.03031	0.302864	0.665275
ENSG00000174197	MGA	protein_coding	MGA, MAX dimerization protein	272.842	0.621497	0.645878	0.962252	0.335923	0.694138
ENSG00000282164	PEG13	sense_intronic	paternally expressed 13	206.994	-0.0802975	0.41193	-0.19493	0.845448	0.986462
ENSG00000175643	RMI2	protein_coding	RecQ mediated genome instability 2	2798.54	0.298147	0.18004	1.65601	0.0977203	0.342128
ENSG00000100626	GALNT16	protein_coding	polypeptide N-acetylgalactosaminyltransferase 16	11.439	0.601622	2.45178	0.245382	0.806161	0.975824
ENSG00000228797	FAM207BP	processed_pseudogene	family with sequence similarity 207 member B, pseudogene	268.556	0.207294	0.345033	0.600793	0.547978	0.850091
ENSG00000269968	AC006064.4	antisense		2.36626	-17.9433	4.62057	-3.88334	0.000103031	0.00167013
ENSG00000230426	ERVMER61-1	lincRNA	endogenous retrovirus group MER61 member 1	13.1172	3.71475	2.22552	1.66916	0.095085	0.335531
ENSG00000136631	VPS45	protein_coding	vacuolar protein sorting 45 homolog	593.817	0.0528805	0.345394	0.153102	0.878318	0.993976
ENSG00000196338	NLGN3	protein_coding	neuroligin 3	73.6679	-2.20671	0.712085	-3.09894	0.00194212	0.0146271
ENSG00000066777	ARFGEF1	protein_coding	ADP ribosylation factor guanine nucleotide exchange factor 1	297.231	1.38822	0.670554	2.07025	0.0384285	0.17454
ENSG00000251429	AC098679.2	transcribed_processed_pseudogene		10.7209	-1.64274	0.925623	-1.77474	0.0759405	0.286806
ENSG00000230039	AL450487.1	processed_pseudogene		1.45264	-17.1075	4.63632	-3.68988	0.000224357	0.00264652
ENSG00000186675	MAGEE2	protein_coding	MAGE family member E2	4.53423	1.36221	4.63824	0.293691	0.768994	0.965025
ENSG00000273184	AC010655.4	processed_transcript		35.3765	1.12454	1.46118	0.769609	0.441532	0.772507
ENSG00000184979	USP18	protein_coding	ubiquitin specific peptidase 18	392.993	-1.16671	0.395538	-2.94967	0.00318109	0.0224157
ENSG00000242571	RPL21P11	processed_pseudogene	ribosomal protein L21 pseudogene 11	7.80076	0.0425352	0.827797	0.0513836	0.95902	0.996331
ENSG00000272335	AC093297.2	lincRNA		22.7361	3.54409	1.87665	1.88852	0.0589558	0.239953
ENSG00000283907	AD000090.1	antisense		10.2226	-4.15939	2.70502	-1.53766	0.124132	0.398925
ENSG00000267041	ZNF850	protein_coding	zinc finger protein 850	69.5419	0.210828	1.30601	0.161429	0.871756	0.99254
ENSG00000250180	AC074344.2	lincRNA		0.911766	-4.43039	4.67466	-0.947746	0.343259	0.700322
ENSG00000251535	AC079140.4	processed_pseudogene		4.01812	-1.09396	2.45968	-0.444757	0.656496	0.913675
ENSG00000227123	RPL12P44	processed_pseudogene	ribosomal protein L12 pseudogene 44	0.70247	10.7057	4.64845	2.30307	0.0212747	0.110823
ENSG00000109062	SLC9A3R1	protein_coding	SLC9A3 regulator 1	6891.94	-1.28795	0.3009	-4.28031	1.86631e-05	0.000552772
ENSG00000266761	MIR3194	miRNA	microRNA 3194	1.95293	7.99477	4.59036	1.74164	0.081571	0.302001
ENSG00000231369	Z97353.1	processed_pseudogene		6.65841	-8.1442	3.83644	-2.12286	0.0337659	0.158036
ENSG00000100625	SIX4	protein_coding	SIX homeobox 4	4.52982	4.04496	4.56147	0.886768	0.375204	0.721265
ENSG00000111530	CAND1	protein_coding	cullin associated and neddylation dissociated 1	2741.3	0.45551	0.447445	1.01802	0.308666	0.669748
ENSG00000120457	KCNJ5	protein_coding	potassium voltage-gated channel subfamily J member 5	8.36731	0.034481	3.23783	0.0106494	0.991503	0.998613
ENSG00000231234	SKP1P1	transcribed_processed_pseudogene	S-phase kinase associated protein 1 pseudogene 1	38.3315	0.923142	0.694793	1.32866	0.183961	0.507774
ENSG00000187486	KCNJ11	protein_coding	potassium voltage-gated channel subfamily J member 11	102.77	3.91331	1.18361	3.30626	0.000945514	0.00786936
ENSG00000272989	LINC02012	lincRNA	long intergenic non-protein coding RNA 2012	59.993	-0.168376	0.559812	-0.300773	0.763588	0.963332
ENSG00000271978	AL359643.2	lincRNA		2.50895	6.31525	4.57686	1.37982	0.167642	0.480446
ENSG00000214176	PLEKHM1P1	transcribed_unprocessed_pseudogene	pleckstrin homology and RUN domain containing M1 pseudogene 1	811.784	-0.519985	0.338686	-1.5353	0.124709	0.400146
ENSG00000100122	CRYBB1	protein_coding	crystallin beta B1	0.794299	-9.84068	4.67466	-2.10511	0.0352817	0.163533
ENSG00000092529	CAPN3	protein_coding	calpain 3	18036.7	0.766283	0.199736	3.83648	0.00012481	0.0018615
ENSG00000154975	CA10	protein_coding	carbonic anhydrase 10	3.83713	0.778778	4.6172	0.168669	0.866057	0.990991
ENSG00000056972	TRAF3IP2	protein_coding	TRAF3 interacting protein 2	4746.72	-0.336095	0.228157	-1.47309	0.140728	0.43187
ENSG00000280214	AC027682.7	TEC		8.37855	3.83693	3.94781	0.971914	0.331093	0.689278
ENSG00000275778	AC018630.2	protein_coding		29.2651	0.480736	0.842232	0.570789	0.568143	0.864637
ENSG00000142875	PRKACB	protein_coding	protein kinase cAMP-activated catalytic subunit beta	1174.92	0.891724	0.435177	2.04911	0.0404516	0.181264
ENSG00000257509	AC073487.1	sense_intronic		4.24354	-0.248041	2.42187	-0.102417	0.918425	0.996331
ENSG00000075790	BCAP29	protein_coding	B cell receptor associated protein 29	500.751	0.364049	0.420412	0.865933	0.386527	0.729496
ENSG00000170927	PKHD1	protein_coding	PKHD1, fibrocystin/polyductin	5.91559	5.608	3.48797	1.60781	0.107876	0.363802
ENSG00000203616	RHOT1P2	processed_pseudogene	ras homolog family member T1 pseudogene 2	6.56082	4.95126	2.32608	2.12859	0.0332885	0.15642
ENSG00000140522	RLBP1	protein_coding	retinaldehyde binding protein 1	0.526021	15.9268	4.63196	3.43846	0.000585023	0.00522665
ENSG00000168172	HOOK3	protein_coding	hook microtubule tethering protein 3	494.478	0.115968	0.294297	0.394052	0.693543	0.932858
ENSG00000102096	PIM2	protein_coding	Pim-2 proto-oncogene, serine/threonine kinase	1870.07	-1.15934	0.22332	-5.19137	2.08752e-07	1.48519e-05
ENSG00000109606	DHX15	protein_coding	DEAH-box helicase 15	3515.71	0.104773	0.387367	0.270475	0.786795	0.970763
ENSG00000225928	CACYBPP1	processed_pseudogene	calcyclin binding protein pseudogene 1	0.46573	-17.4588	4.62594	-3.77412	0.000160576	0.00213545
ENSG00000120451	SNX19	protein_coding	sorting nexin 19	3954.3	0.0752358	0.19212	0.391608	0.695348	0.933884
ENSG00000262445	AC099684.2	antisense		3.54847	0.100956	4.61902	0.0218566	0.982562	0.996421
ENSG00000279897	BIRC6-AS2	transcribed_unprocessed_pseudogene	BIRC6 antisense RNA 2	3.08777	2.15286	4.58102	0.469952	0.63839	0.903344
ENSG00000215915	ATAD3C	protein_coding	ATPase family, AAA domain containing 3C	67.8536	2.34451	1.76723	1.32666	0.184622	0.50862
ENSG00000276291	FRG1HP	transcribed_unprocessed_pseudogene	FSHD region gene 1 family member H, pseudogene	97.3266	-0.416936	0.757884	-0.550131	0.582229	0.873785
ENSG00000117133	RPF1	protein_coding	ribosome production factor 1 homolog	1064.25	0.41227	0.377762	1.09135	0.27512	0.6356
ENSG00000085999	RAD54L	protein_coding	RAD54 like	1756.15	-0.98822	0.337184	-2.9308	0.00338092	0.0235946
ENSG00000269910	AL049840.2	antisense		207.828	-1.04489	0.444846	-2.34888	0.0188299	0.100292
ENSG00000165646	SLC18A2	protein_coding	solute carrier family 18 member A2	9.89449	5.63273	3.23749	1.73984	0.0818866	0.302799
ENSG00000110172	CHORDC1	protein_coding	cysteine and histidine rich domain containing 1	342.596	0.637404	0.795147	0.801618	0.422774	0.758161
ENSG00000164889	SLC4A2	protein_coding	solute carrier family 4 member 2	138298	-2.7644	0.231826	-11.9245	8.82309e-33	8.01401e-29
ENSG00000258337	AC130895.1	sense_intronic		0.338986	-2.53181	4.61515	-0.548587	0.583289	0.874452
ENSG00000167384	ZNF180	protein_coding	zinc finger protein 180	64.3755	0.978674	1.24935	0.783348	0.433423	0.767137
ENSG00000113732	ATP6V0E1	protein_coding	ATPase H+ transporting V0 subunit e1	11940.3	0.300064	0.215272	1.39388	0.163353	0.472577
ENSG00000278603	AC245033.3	unprocessed_pseudogene		39.5506	-1.11397	0.467638	-2.38211	0.0172136	0.093103
ENSG00000269966	AL136164.2	lincRNA		0.350447	-17.0273	4.62899	-3.6784	0.000234704	0.00271915
ENSG00000138152	BTBD16	protein_coding	BTB domain containing 16	0.40066	16.5795	4.64681	3.56792	0.000359822	0.00357839
ENSG00000243964	RPL23AP65	processed_pseudogene	ribosomal protein L23a pseudogene 65	14.8669	-1.46701	1.18878	-1.23405	0.217186	0.559534
ENSG00000102921	N4BP1	protein_coding	NEDD4 binding protein 1	1921.92	0.337203	0.227927	1.47943	0.139025	0.429122
ENSG00000100216	TOMM22	protein_coding	translocase of outer mitochondrial membrane 22	6352.42	-0.246673	0.152263	-1.62004	0.105223	0.358313
ENSG00000143178	TBX19	protein_coding	T-box 19	48.4153	0.433285	1.17406	0.369047	0.712093	0.942162
ENSG00000126231	PROZ	protein_coding	protein Z, vitamin K dependent plasma glycoprotein	0.574635	-18.7553	4.64606	-4.03681	5.41824e-05	0.00112275
ENSG00000232573	RPL3P4	processed_pseudogene	ribosomal protein L3 pseudogene 4	3870.52	-0.144736	0.174527	-0.829301	0.406934	0.745966
ENSG00000261431	AL023803.1	antisense		3.23792	2.42791	4.6227	0.525214	0.599434	0.883109
ENSG00000167178	ISLR2	protein_coding	immunoglobulin superfamily containing leucine rich repeat 2	5.26972	19.4973	4.61851	4.22155	2.42623e-05	0.000651354
ENSG00000155016	CYP2U1	protein_coding	cytochrome P450 family 2 subfamily U member 1	5585.47	0.383237	0.249822	1.53404	0.125019	0.400564
ENSG00000260092	AC009163.2	protein_coding		3.13152	-2.4538	4.60585	-0.532758	0.594201	0.87968
ENSG00000092054	MYH7	protein_coding	myosin heavy chain 7	24.836	0.0484494	0.729456	0.0664185	0.947045	0.996331
ENSG00000206989	SNORD63	snoRNA	small nucleolar RNA, C/D box 63	0.760082	-0.804458	4.60947	-0.174523	0.861455	0.990073
ENSG00000176752	OR51A1P	unprocessed_pseudogene	olfactory receptor family 51 subfamily A member 1 pseudogene	1.80138	-19.6418	4.64576	-4.22789	2.3589e-05	0.000645359
ENSG00000105865	DUS4L	protein_coding	dihydrouridine synthase 4 like	76.694	0.962349	1.02775	0.936364	0.349086	0.703637
ENSG00000151632	AKR1C2	protein_coding	aldo-keto reductase family 1 member C2	132.237	3.75837	0.901318	4.16986	3.04784e-05	0.0007697
ENSG00000180089	TMEM86B	protein_coding	transmembrane protein 86B	355.175	-0.507827	0.290202	-1.74991	0.0801337	0.298097
ENSG00000078295	ADCY2	protein_coding	adenylate cyclase 2	629.866	1.21341	0.409664	2.96196	0.00305687	0.021658
ENSG00000276488	AC008735.4	antisense		40.2777	0.188625	0.873679	0.215897	0.829068	0.983182
ENSG00000147509	RGS20	protein_coding	regulator of G protein signaling 20	1718.81	0.355115	0.282226	1.25827	0.208296	0.546911
ENSG00000272601	AC010655.3	transcribed_unprocessed_pseudogene		4.37427	1.96486	4.53864	0.432918	0.665074	0.917891
ENSG00000084623	EIF3I	protein_coding	eukaryotic translation initiation factor 3 subunit I	16913.9	-0.227613	0.208699	-1.09062	0.275438	0.636074
ENSG00000205018	AC092384.1	antisense		0.774952	18.2412	4.64628	3.92599	8.63751e-05	0.00151359
ENSG00000164104	HMGB2	protein_coding	high mobility group box 2	1889.66	0.113163	0.458084	0.247036	0.80488	0.975399
ENSG00000237685	AL139039.3	antisense		15.6855	-0.00787647	1.81513	-0.00433934	0.996538	0.99975
ENSG00000222011	FAM185A	protein_coding	family with sequence similarity 185 member A	147.122	-0.0285491	0.310403	-0.0919741	0.926719	0.996331
ENSG00000283503	LINC01902	lincRNA	long intergenic non-protein coding RNA 1902	0.893341	17.3808	4.64605	3.74098	0.000183303	0.00234169
ENSG00000177889	UBE2N	protein_coding	ubiquitin conjugating enzyme E2 N	4725.59	0.136432	0.242533	0.562528	0.573756	0.867846
ENSG00000267449	AC005884.2	antisense		0.696878	-0.413895	4.62912	-0.0894113	0.928755	0.996331
ENSG00000154678	PDE1C	protein_coding	phosphodiesterase 1C	5.57846	3.58876	3.66318	0.979682	0.327243	0.685834
ENSG00000200530	SNORD35B	snoRNA	small nucleolar RNA, C/D box 35B	5.97939	2.68159	1.31233	2.04338	0.0410144	0.183213
ENSG00000237595	AL161937.2	lincRNA		3.50165	23.9436	4.5945	5.21136	1.87461e-07	1.35494e-05
ENSG00000165029	ABCA1	protein_coding	ATP binding cassette subfamily A member 1	311.557	0.368929	0.525602	0.701917	0.482731	0.804817
ENSG00000232188	AL354714.3	lincRNA		0.586136	-4.33564	4.67466	-0.927477	0.353679	0.70645
ENSG00000159885	ZNF222	protein_coding	zinc finger protein 222	44.4508	0.888452	1.46552	0.606236	0.544358	0.847563
ENSG00000254577	AC087276.1	sense_overlapping		0.601472	-0.0494792	4.62555	-0.0106969	0.991465	0.998612
ENSG00000239523	MYLK-AS1	antisense	MYLK antisense RNA 1	26.9774	0.0380829	1.1496	0.0331272	0.973573	0.996331
ENSG00000196290	NIF3L1	protein_coding	NGG1 interacting factor 3 like 1	799.986	0.19594	0.240619	0.814319	0.415462	0.753072
ENSG00000148677	ANKRD1	protein_coding	ankyrin repeat domain 1	36.7061	9.50866	2.20707	4.30828	1.64531e-05	0.000499811
ENSG00000153898	MCOLN2	protein_coding	mucolipin 2	94.1411	-1.08371	1.37778	-0.786567	0.431535	0.765614
ENSG00000146085	MUT	protein_coding	methylmalonyl-CoA mutase	771.808	0.73547	0.461387	1.59404	0.110927	0.370059
ENSG00000009844	VTA1	protein_coding	vesicle trafficking 1	1387.62	0.454302	0.371206	1.22386	0.221007	0.565519
ENSG00000225357	RPF2P1	processed_pseudogene	ribosome production factor 2 homolog pseudogene 1	9.81443	1.15529	1.04963	1.10066	0.271045	0.630287
ENSG00000050820	BCAR1	protein_coding	BCAR1, Cas family scaffolding protein	24983.7	-0.470798	0.160199	-2.93883	0.00329458	0.0231079
ENSG00000159263	SIM2	protein_coding	single-minded family bHLH transcription factor 2	6.53375	-1.79227	3.08516	-0.580931	0.561287	0.859194
ENSG00000248810	LINC02432	lincRNA	long intergenic non-protein coding RNA 2432	0.358426	-1.16285	4.64374	-0.250412	0.802269	0.974549
ENSG00000279361	AC079331.1	TEC		1.20015	7.28043	4.56974	1.59318	0.111119	0.370384
ENSG00000275832	ARHGAP23	protein_coding	Rho GTPase activating protein 23	2762.56	0.0851953	0.259792	0.327937	0.742959	0.954841
ENSG00000005421	PON1	protein_coding	paraoxonase 1	1.11294	17.5584	4.6457	3.7795	0.000157141	0.00209924
ENSG00000121766	ZCCHC17	protein_coding	zinc finger CCHC-type containing 17	1220.4	-0.0225539	0.27409	-0.0822864	0.934419	0.996331
ENSG00000125746	EML2	protein_coding	echinoderm microtubule associated protein like 2	13742.9	-0.369541	0.240654	-1.53557	0.124645	0.40006
ENSG00000180846	CSNK1G2-AS1	antisense	CSNK1G2 antisense RNA 1	4.09741	-1.13514	4.58624	-0.247509	0.804514	0.975399
ENSG00000048342	CC2D2A	protein_coding	coiled-coil and C2 domain containing 2A	1266.33	-0.210401	0.270655	-0.777377	0.436936	0.769452
ENSG00000178623	GPR35	protein_coding	G protein-coupled receptor 35	8.01634	3.98902	2.2544	1.76944	0.0768212	0.28901
ENSG00000116690	PRG4	protein_coding	proteoglycan 4	95.908	7.37668	1.78317	4.13683	3.52138e-05	0.000850658
ENSG00000257489	AC010203.1	transcribed_unprocessed_pseudogene		0.420985	-8.05417	4.67466	-1.72294	0.0848989	0.310733
ENSG00000081853	PCDHGA2	protein_coding	protocadherin gamma subfamily A, 2	132.268	1.62852	0.640133	2.54403	0.0109581	0.0642004
ENSG00000170468	RIOX1	protein_coding	ribosomal oxygenase 1	3749.4	-0.998735	0.14312	-6.97828	2.98811e-12	1.05744e-09
ENSG00000104804	TULP2	protein_coding	tubby like protein 2	12.7671	-1.12941	1.96525	-0.574689	0.565502	0.862805
ENSG00000226432	AC010342.1	processed_pseudogene		11.4958	0.359244	1.12361	0.319724	0.749178	0.957656
ENSG00000140854	KATNB1	protein_coding	katanin regulatory subunit B1	17769.3	-0.302988	0.210409	-1.44	0.149868	0.448813
ENSG00000212719	C17orf51	protein_coding	chromosome 17 open reading frame 51	1985.92	-0.177407	0.284793	-0.622935	0.533327	0.840571
ENSG00000170959	DCDC1	protein_coding	doublecortin domain containing 1	6.91538	6.97981	4.38264	1.59261	0.111249	0.370725
ENSG00000281490	CICP14	processed_pseudogene	capicua transcriptional repressor pseudogene 14	329.557	-0.0441995	0.420189	-0.105189	0.916225	0.996331
ENSG00000272921	AC005832.4	protein_coding		12.0403	-1.8525	2.05793	-0.900178	0.368025	0.717269
ENSG00000198105	ZNF248	protein_coding	zinc finger protein 248	87.8184	-0.455954	0.743917	-0.61291	0.539936	0.844425
ENSG00000109339	MAPK10	protein_coding	mitogen-activated protein kinase 10	49.1413	5.66694	1.34328	4.21875	2.45665e-05	0.000656902
ENSG00000095794	CREM	protein_coding	cAMP responsive element modulator	659.799	0.565789	0.273469	2.06893	0.0385522	0.174715
ENSG00000206997	RNU6-524P	snRNA	RNA, U6 small nuclear 524, pseudogene	0.478138	-4.25657	4.67466	-0.910561	0.362527	0.713395
ENSG00000243053	RPL31P58	processed_pseudogene	ribosomal protein L31 pseudogene 58	1.11361	0.0105839	4.63448	0.00228374	0.998178	0.99975
ENSG00000023041	ZDHHC6	protein_coding	zinc finger DHHC-type containing 6	1423.4	0.124527	0.319605	0.389628	0.696811	0.93419
ENSG00000284830	AL049557.1	bidirectional_promoter_lncRNA		3.79044	-1.70901	3.21586	-0.531432	0.595119	0.880114
ENSG00000184271	POU6F1	protein_coding	POU class 6 homeobox 1	798.802	-0.734454	0.263046	-2.79211	0.00523651	0.0343302
ENSG00000249141	AL159163.1	protein_coding		0.586136	-4.33564	4.67466	-0.927477	0.353679	0.70645
ENSG00000173546	CSPG4	protein_coding	chondroitin sulfate proteoglycan 4	86446.9	-1.73782	0.233921	-7.42906	1.0937e-13	5.41858e-11
ENSG00000178372	CALML5	protein_coding	calmodulin like 5	0.268278	-4.37146	4.67466	-0.935139	0.349717	0.703637
ENSG00000231699	AC020550.1	processed_pseudogene		0.200833	-5.15006	4.67466	-1.1017	0.270593	0.629809
ENSG00000147439	BIN3	protein_coding	bridging integrator 3	7717.35	-0.64793	0.218969	-2.95901	0.00308628	0.0218323
ENSG00000176383	B3GNT4	protein_coding	UDP-GlcNAc:betaGal beta-1,3-N-acetylglucosaminyltransferase 4	25.0815	0.213665	1.18274	0.180653	0.85664	0.989386
ENSG00000123560	PLP1	protein_coding	proteolipid protein 1	2778.88	0.401481	0.324955	1.2355	0.216645	0.558693
ENSG00000275223	AL121906.2	lincRNA		27.1006	-0.0760978	1.30382	-0.0583651	0.953458	0.996331
ENSG00000125744	RTN2	protein_coding	reticulon 2	13926.7	0.128407	0.249739	0.514166	0.607136	0.887722
ENSG00000250234	AC025754.1	antisense		6.48827	-2.226	3.42843	-0.649278	0.516158	0.828511
ENSG00000100652	SLC10A1	protein_coding	solute carrier family 10 member 1	1.48337	0.722142	4.49529	0.160644	0.872374	0.992746
ENSG00000259660	DNM1P47	transcribed_unprocessed_pseudogene	dynamin 1 pseudogene 47	8.77373	-1.06878	2.38375	-0.44836	0.653894	0.912524
ENSG00000157315	TMED6	protein_coding	transmembrane p24 trafficking protein 6	29.8333	2.23615	1.48727	1.50353	0.132702	0.415631
ENSG00000015532	XYLT2	protein_coding	xylosyltransferase 2	10515.7	-0.568991	0.204278	-2.78537	0.00534662	0.0349345
ENSG00000165732	DDX21	protein_coding	DExD-box helicase 21	513.91	0.919799	0.759927	1.21038	0.226134	0.572976
ENSG00000185437	SH3BGR	protein_coding	SH3 domain binding glutamate rich protein	43.995	-0.081416	0.830912	-0.0979839	0.921945	0.996331
ENSG00000168268	NT5DC2	protein_coding	5'-nucleotidase domain containing 2	29144.2	-0.510192	0.222863	-2.28926	0.0220641	0.113868
ENSG00000152240	HAUS1	protein_coding	HAUS augmin like complex subunit 1	324.383	-0.24651	0.665191	-0.370586	0.710946	0.941347
ENSG00000225513	AL158824.1	processed_pseudogene		0.546443	-3.69396	4.67466	-0.79021	0.429405	0.763565
ENSG00000154642	C21orf91	protein_coding	chromosome 21 open reading frame 91	1222.73	-0.74271	0.705129	-1.0533	0.292205	0.6545
ENSG00000127530	OR7C1	protein_coding	olfactory receptor family 7 subfamily C member 1	705.766	1.04431	0.434089	2.40574	0.0161397	0.0883602
ENSG00000183298	RPSAP19	processed_pseudogene	ribosomal protein SA pseudogene 19	852.05	-0.348081	0.211504	-1.64574	0.0998177	0.346135
ENSG00000143319	ISG20L2	protein_coding	interferon stimulated exonuclease gene 20 like 2	3468.25	-0.2666	0.268079	-0.994482	0.319988	0.680981
ENSG00000275634	RF02160	misc_RNA		7.62084	2.00484	1.45851	1.37459	0.169259	0.48391
ENSG00000166140	ZFYVE19	protein_coding	zinc finger FYVE-type containing 19	5115.71	-0.424948	0.197735	-2.14907	0.0316285	0.150541
ENSG00000140905	GCSH	protein_coding	glycine cleavage system protein H	655.254	0.157987	0.325352	0.485586	0.627261	0.897513
ENSG00000268750	AC010522.1	protein_coding		20.1535	0.997291	2.39447	0.416498	0.677046	0.924741
ENSG00000264595	AC103808.2	lincRNA		3.07433	18.2056	4.6186	3.9418	8.08717e-05	0.00146521
ENSG00000165730	STOX1	protein_coding	storkhead box 1	4.61521	-0.0740104	2.47519	-0.0299009	0.976146	0.996331
ENSG00000175745	NR2F1	protein_coding	nuclear receptor subfamily 2 group F member 1	229.471	0.144485	0.600445	0.24063	0.809842	0.976911
ENSG00000186017	ZNF566	protein_coding	zinc finger protein 566	95.1837	-0.200439	0.672427	-0.298083	0.76564	0.963994
ENSG00000283633	AP000547.3	lincRNA		1.49807	0.15423	4.67466	0.0329927	0.97368	0.996331
ENSG00000221852	KRTAP1-5	protein_coding	keratin associated protein 1-5	0.741287	-6.13989	4.67466	-1.31344	0.189035	0.516531
ENSG00000123562	MORF4L2	protein_coding	mortality factor 4 like 2	5873	0.0914022	0.221092	0.413412	0.679305	0.926213
ENSG00000139977	NAA30	protein_coding	N(alpha)-acetyltransferase 30, NatC catalytic subunit	1324.79	0.378061	0.344153	1.09853	0.271974	0.631532
ENSG00000272420	AL513477.2	sense_intronic		2.7309	0.596229	3.78339	0.157591	0.874779	0.993609
ENSG00000073756	PTGS2	protein_coding	prostaglandin-endoperoxide synthase 2	223.527	0.889586	0.584365	1.52231	0.127931	0.406481
ENSG00000230747	AC021188.1	antisense		14.5697	-4.87086	1.65965	-2.93487	0.00333685	0.0233503
ENSG00000245910	SNHG6	processed_transcript	small nucleolar RNA host gene 6	1953.81	0.11268	0.18509	0.608785	0.542667	0.846203
ENSG00000256167	ATF4P4	transcribed_processed_pseudogene	activating transcription factor 4 pseudogene 4	6.76749	0.36895	1.49971	0.246014	0.805671	0.975711
ENSG00000187147	RNF220	protein_coding	ring finger protein 220	6244.19	-0.0266952	0.187727	-0.142202	0.88692	0.995583
ENSG00000159082	SYNJ1	protein_coding	synaptojanin 1	469.374	0.32398	0.759159	0.426762	0.669553	0.920166
ENSG00000278416	PMS2P2	unprocessed_pseudogene	PMS1 homolog 2, mismatch repair system component pseudogene 2	38.4381	-0.00112666	0.737941	-0.00152676	0.998782	0.99975
ENSG00000159202	UBE2Z	protein_coding	ubiquitin conjugating enzyme E2 Z	5805.29	-0.264849	0.221225	-1.19719	0.231231	0.58073
ENSG00000277349	AC133919.3	unprocessed_pseudogene		1.06224	-0.100198	2.94981	-0.0339677	0.972903	0.996331
ENSG00000137955	RABGGTB	protein_coding	Rab geranylgeranyltransferase beta subunit	1951.32	0.570584	0.236104	2.41666	0.0156636	0.0862606
ENSG00000136861	CDK5RAP2	protein_coding	CDK5 regulatory subunit associated protein 2	764.304	-0.206829	0.362313	-0.570858	0.568096	0.864614
ENSG00000267598	AC011446.2	antisense		1.75114	0.154227	4.67466	0.0329922	0.973681	0.996331
ENSG00000254388	DUTP2	processed_pseudogene	deoxyuridine triphosphatase pseudogene 2	0.550624	-0.768042	4.63531	-0.165694	0.868398	0.991988
ENSG00000268568	AC007228.2	lincRNA		42.3471	-0.619816	0.760389	-0.81513	0.414998	0.753072
ENSG00000277941	RF01875	misc_RNA		0.939849	-18.9966	4.64639	-4.08846	4.34247e-05	0.000966731
ENSG00000131849	ZNF132	protein_coding	zinc finger protein 132	129.558	-0.956912	0.560559	-1.70707	0.0878092	0.317842
ENSG00000120937	NPPB	protein_coding	natriuretic peptide B	2.28104	5.71585	4.56878	1.25107	0.21091	0.550814
ENSG00000215190	LINC00680	transcribed_unprocessed_pseudogene	long intergenic non-protein coding RNA 680	181.299	0.636093	0.494196	1.28713	0.19805	0.530907
ENSG00000278517	MIR6865	miRNA	microRNA 6865	1.11019	-1.64705	3.44427	-0.478199	0.632508	0.900846
ENSG00000261824	LINC00662	lincRNA	long intergenic non-protein coding RNA 662	268.3	0.922062	0.276899	3.32996	0.000868576	0.00731617
ENSG00000225920	RIMKLBP2	processed_pseudogene	ribosomal modification protein rimK like family member B pseudogene 2	2.30871	-1.533	3.73112	-0.41087	0.681168	0.926948
ENSG00000003147	ICA1	protein_coding	islet cell autoantigen 1	262.099	0.380956	0.440222	0.865372	0.386835	0.729753
ENSG00000154025	SLC5A10	protein_coding	solute carrier family 5 member 10	3271.23	-0.30916	0.22721	-1.36068	0.173615	0.491414
ENSG00000283360	AL592295.3	lincRNA		0.694173	0.154223	4.67466	0.0329913	0.973682	0.996331
ENSG00000178464	RPL10P16	processed_pseudogene	ribosomal protein L10 pseudogene 16	10874.1	-0.146728	0.16365	-0.896593	0.369936	0.718215
ENSG00000021762	OSBPL5	protein_coding	oxysterol binding protein like 5	8937.12	-1.00765	0.206263	-4.88524	1.03303e-06	5.61858e-05
ENSG00000218305	CDC14C	processed_pseudogene	cell division cycle 14C	19.2649	-0.0731802	1.69181	-0.0432557	0.965498	0.996331
ENSG00000072518	MARK2	protein_coding	microtubule affinity regulating kinase 2	5135.18	-0.385084	0.206407	-1.86565	0.0620905	0.248558
ENSG00000248714	AC091180.2	lincRNA		10.1202	3.65694	2.51224	1.45565	0.14549	0.440007
ENSG00000160867	FGFR4	protein_coding	fibroblast growth factor receptor 4	1006.24	0.697157	0.268147	2.5999	0.009325	0.0561044
ENSG00000255176	AP000941.1	antisense		10.0123	-2.58824	2.7609	-0.937464	0.34852	0.703637
ENSG00000121060	TRIM25	protein_coding	tripartite motif containing 25	8193.26	-0.765703	0.172527	-4.43816	9.07332e-06	0.00031738
ENSG00000254676	AP000873.4	sense_overlapping		4.73697	1.67181	2.17568	0.768409	0.442244	0.773126
ENSG00000134987	WDR36	protein_coding	WD repeat domain 36	370.254	0.00235505	0.547717	0.00429976	0.996569	0.99975
ENSG00000280269	AP000577.1	TEC		0.968641	-3.36718	4.5945	-0.732872	0.463637	0.790267
ENSG00000258837	AL133370.1	antisense		0.356383	-17.6543	4.64777	-3.79844	0.000145607	0.00202365
ENSG00000172197	MBOAT1	protein_coding	membrane bound O-acyltransferase domain containing 1	776.664	-0.0104697	0.242691	-0.0431401	0.96559	0.996331
ENSG00000166828	SCNN1G	protein_coding	sodium channel epithelial 1 gamma subunit	0.530572	0.229352	4.57653	0.0501149	0.960031	0.996331
ENSG00000130545	CRB3	protein_coding	crumbs 3, cell polarity complex component	44.0311	4.59048	1.50115	3.05797	0.00222845	0.0164919
ENSG00000235280	MCF2L-AS1	antisense	MCF2L antisense RNA 1	3.01056	1.09528	4.55352	0.240534	0.809916	0.976911
ENSG00000132953	XPO4	protein_coding	exportin 4	677.722	0.0611015	0.813926	0.0750701	0.940159	0.996331
ENSG00000112697	TMEM30A	protein_coding	transmembrane protein 30A	3489.21	0.515622	0.42561	1.21149	0.225708	0.57276
ENSG00000273249	BX649632.1	antisense		7.52147	-19.5658	4.67466	-4.18549	2.84548e-05	0.000730098
ENSG00000284341	AL807752.7	protein_coding		11.0499	3.20724	4.59763	0.697586	0.485436	0.806417
ENSG00000134463	ECHDC3	protein_coding	enoyl-CoA hydratase domain containing 3	1213.95	0.839969	0.259183	3.24084	0.00119179	0.00959381
ENSG00000250899	AC125807.2	lincRNA		661.837	-0.74328	0.302909	-2.45381	0.0141352	0.0791719
ENSG00000214485	RPL7P1	processed_pseudogene	ribosomal protein L7 pseudogene 1	1244.71	-0.0992822	0.269876	-0.36788	0.712962	0.942488
ENSG00000222051	RNU6-1165P	snRNA	RNA, U6 small nuclear 1165, pseudogene	0.30393	0.154232	4.67466	0.0329932	0.97368	0.996331
ENSG00000138658	ZGRF1	protein_coding	zinc finger GRF-type containing 1	30.8639	0.11164	1.37422	0.0812388	0.935252	0.996331
ENSG00000185753	CXorf38	protein_coding	chromosome X open reading frame 38	667.937	0.321094	0.323784	0.99169	0.321349	0.680981
ENSG00000249816	LINC00964	lincRNA	long intergenic non-protein coding RNA 964	1.13267	1.10989	4.61977	0.240247	0.810138	0.976917
ENSG00000274642	AC244669.2	unprocessed_pseudogene		8.75954	2.06175	2.27142	0.907692	0.364041	0.714295
ENSG00000189376	C8orf76	protein_coding	chromosome 8 open reading frame 76	312.152	0.330899	0.373943	0.884892	0.376215	0.721845
ENSG00000204580	DDR1	protein_coding	discoidin domain receptor tyrosine kinase 1	3424.14	-0.139871	0.302061	-0.463057	0.643324	0.906486
ENSG00000134817	APLNR	protein_coding	apelin receptor	6.39235	-1.49642	4.49944	-0.332579	0.739452	0.953329
ENSG00000100918	REC8	protein_coding	REC8 meiotic recombination protein	3281.96	-0.101945	0.275245	-0.370378	0.711101	0.941359
ENSG00000248724	NPHP3-AS1	antisense	NPHP3 antisense RNA 1	14.0396	-0.503256	1.29167	-0.389617	0.696819	0.93419
ENSG00000113361	CDH6	protein_coding	cadherin 6	56.9924	3.40175	1.53738	2.21269	0.0269189	0.132955
ENSG00000066336	SPI1	protein_coding	Spi-1 proto-oncogene	22.3403	-1.17034	1.55857	-0.750907	0.452709	0.781096
ENSG00000262662	AC127496.4	antisense		1.63933	-3.56523	4.59629	-0.775675	0.437941	0.769949
ENSG00000182405	PGBD4	protein_coding	piggyBac transposable element derived 4	74.8979	1.23211	1.03857	1.18636	0.235481	0.586066
ENSG00000019582	CD74	protein_coding	CD74 molecule	1103.26	2.88967	0.685635	4.21459	2.50234e-05	0.000665098
ENSG00000188229	TUBB4B	protein_coding	tubulin beta 4B class IVb	104934	-0.76638	0.243925	-3.14186	0.00167877	0.0128895
ENSG00000219395	HSPA8P15	processed_pseudogene	heat shock protein family A (Hsp70) member 8 pseudogene 15	1.11447	-0.825517	4.62349	-0.178548	0.858292	0.989987
ENSG00000197782	ZNF780A	protein_coding	zinc finger protein 780A	122.321	0.394454	0.432176	0.912716	0.361392	0.712987
ENSG00000266184	AC018371.2	processed_pseudogene		1.99315	3.24093	3.26355	0.993068	0.320677	0.680981
ENSG00000236740	AL033384.1	lincRNA		0.40066	16.5795	4.64681	3.56792	0.000359822	0.00357839
ENSG00000186951	PPARA	protein_coding	peroxisome proliferator activated receptor alpha	967.281	-0.13346	0.592867	-0.225109	0.821894	0.980251
ENSG00000090020	SLC9A1	protein_coding	solute carrier family 9 member A1	15809.8	-0.654882	0.26534	-2.46808	0.0135838	0.0766664
ENSG00000204947	ZNF425	protein_coding	zinc finger protein 425	183.176	0.383246	0.653353	0.586582	0.557484	0.857273
ENSG00000269713	NBPF9	protein_coding	NBPF member 9	556.258	0.181826	0.42441	0.428421	0.668345	0.919409
ENSG00000199961	SNORD1B	snoRNA	small nucleolar RNA, C/D box 1B	3.39289	-1.14939	2.05051	-0.560539	0.575112	0.868597
ENSG00000170100	ZNF778	protein_coding	zinc finger protein 778	246.761	1.413	0.606709	2.32896	0.0198611	0.104903
ENSG00000249337	SNX18P25	processed_pseudogene	sorting nexin 18 pseudogene 25	0.715341	17.5078	4.64638	3.76805	0.000164527	0.00217209
ENSG00000121064	SCPEP1	protein_coding	serine carboxypeptidase 1	6475.98	0.0932523	0.144804	0.64399	0.519582	0.830679
ENSG00000243660	ZNF487	protein_coding	zinc finger protein 487	41.474	-0.0361499	1.01549	-0.0355984	0.971603	0.996331
ENSG00000229728	AL136531.1	antisense		1.11298	-0.586303	4.57974	-0.128021	0.898132	0.996331
ENSG00000145321	GC	protein_coding	GC, vitamin D binding protein	650.698	5.08966	1.57346	3.23469	0.00121776	0.00975959
ENSG00000205707	ETFRF1	protein_coding	electron transfer flavoprotein regulatory factor 1	225.144	0.41779	0.518861	0.805206	0.420701	0.757078
ENSG00000179097	HTR1F	protein_coding	5-hydroxytryptamine receptor 1F	7.11334	7.24371	3.12907	2.31497	0.0206144	0.107941
ENSG00000143756	FBXO28	protein_coding	F-box protein 28	986.732	0.435202	0.615285	0.707318	0.479369	0.802615
ENSG00000167004	PDIA3	protein_coding	protein disulfide isomerase family A member 3	15942.5	-0.279852	0.237204	-1.17979	0.238082	0.589841
ENSG00000124120	TTPAL	protein_coding	alpha tocopherol transfer protein like	1258.01	-0.490716	0.32539	-1.50808	0.131533	0.413637
ENSG00000185291	IL3RA	protein_coding	interleukin 3 receptor subunit alpha	17.9327	-2.60058	1.60035	-1.62501	0.10416	0.356072
ENSG00000189195	BTBD8	protein_coding	BTB domain containing 8	26.4598	2.14483	1.5428	1.39022	0.164463	0.474572
ENSG00000124107	SLPI	protein_coding	secretory leukocyte peptidase inhibitor	70.1599	7.22502	2.45038	2.94853	0.00319291	0.0224815
ENSG00000248126	AC091849.1	unprocessed_pseudogene		8.30161	0.84551	1.07981	0.783019	0.433616	0.767227
ENSG00000237232	ZNF295-AS1	lincRNA	ZNF295 antisense RNA 1	194.715	1.87993	0.810175	2.32041	0.0203189	0.106742
ENSG00000259367	AC087286.2	antisense		2.689	-3.20869	4.23481	-0.757692	0.448635	0.777549
ENSG00000142856	ITGB3BP	protein_coding	integrin subunit beta 3 binding protein	140.171	-0.718332	0.516649	-1.39037	0.164417	0.474496
ENSG00000240477	AC022494.1	processed_pseudogene		0.89425	0.63859	4.62183	0.138168	0.890107	0.995919
ENSG00000198113	TOR4A	protein_coding	torsin family 4 member A	15927.3	-0.727888	0.181268	-4.01553	5.93125e-05	0.00120257
ENSG00000125686	MED1	protein_coding	mediator complex subunit 1	1191.61	-0.390427	0.306941	-1.27199	0.203376	0.539598
ENSG00000147571	CRH	protein_coding	corticotropin releasing hormone	58.2238	5.73791	2.66675	2.15165	0.0314248	0.14978
ENSG00000161594	KLHL10	protein_coding	kelch like family member 10	0.667767	17.2438	4.64612	3.71144	0.000206084	0.00252141
ENSG00000271550	BNIP3P11	processed_pseudogene	BCL2 interacting protein 3 pseudogene 11	4.89261	6.12292	3.98155	1.53782	0.124092	0.398841
ENSG00000157150	TIMP4	protein_coding	TIMP metallopeptidase inhibitor 4	191.699	0.903793	0.348777	2.59132	0.00956092	0.0573339
ENSG00000244462	RBM12	protein_coding	RNA binding motif protein 12	1191.69	0.120016	0.478336	0.250903	0.801889	0.974549
ENSG00000150593	PDCD4	protein_coding	programmed cell death 4	910.144	0.0700036	0.435663	0.160683	0.872343	0.992746
ENSG00000281181	FP236383.3	lincRNA		422089	-0.422155	0.30967	-1.36324	0.172806	0.489945
ENSG00000184898	RBM43	protein_coding	RNA binding motif protein 43	196.882	0.671961	0.756172	0.888636	0.374199	0.72096
ENSG00000245857	AF233439.1	lincRNA		1.18791	4.71305	4.57561	1.03004	0.302992	0.665289
ENSG00000100271	TTLL1	protein_coding	tubulin tyrosine ligase like 1	1284.61	0.398853	0.247839	1.60932	0.107546	0.363001
ENSG00000188710	QRFP	protein_coding	pyroglutamylated RFamide peptide	17.6634	1.15598	1.54484	0.748284	0.454289	0.782297
ENSG00000153922	CHD1	protein_coding	chromodomain helicase DNA binding protein 1	106.86	0.658294	0.844921	0.779119	0.43591	0.768599
ENSG00000275601	AC011330.2	sense_intronic		7.08416	-1.06261	1.76836	-0.600899	0.547907	0.85003
ENSG00000232952	AL512844.1	processed_pseudogene		15.4875	1.31032	1.65601	0.791249	0.428798	0.763183
ENSG00000141639	MAPK4	protein_coding	mitogen-activated protein kinase 4	21.1604	2.9917	2.82377	1.05947	0.289386	0.652126
ENSG00000161996	WDR90	protein_coding	WD repeat domain 90	4845.85	-0.559531	0.20608	-2.71511	0.00662531	0.0419844
ENSG00000144460	NYAP2	protein_coding	neuronal tyrosine-phosphorylated phosphoinositide-3-kinase adaptor 2	2.57407	23.0328	4.59124	5.01668	5.25732e-07	3.17642e-05
ENSG00000272948	AP001412.1	antisense		15.9618	0.941576	1.37888	0.682855	0.494699	0.813374
ENSG00000274292	AC084018.2	lincRNA		59.42	-0.13034	1.01692	-0.128172	0.898013	0.996331
ENSG00000224114	AL591846.1	processed_pseudogene		852.559	1.53146	0.636363	2.40659	0.0161023	0.0882484
ENSG00000115592	PRKAG3	protein_coding	protein kinase AMP-activated non-catalytic subunit gamma 3	1.69004	-13.7163	4.67466	-2.93418	0.00334426	0.0233961
ENSG00000273069	AC211433.2	lincRNA		0.86332	-15.6042	4.65661	-3.35097	0.000805301	0.00685613
ENSG00000235256	FKBP4P7	processed_pseudogene	FK506 binding protein 4 pseudogene 7	3.35475	-0.102921	3.18599	-0.0323043	0.974229	0.996331
ENSG00000198301	SDAD1	protein_coding	SDA1 domain containing 1	213.705	1.08413	0.956961	1.13289	0.25726	0.614408
ENSG00000131910	NR0B2	protein_coding	nuclear receptor subfamily 0 group B member 2	17.2051	7.26872	2.40036	3.02818	0.00246034	0.01794
ENSG00000259379	MTND5P32	processed_pseudogene	mitochondrially encoded NADH:ubiquinone oxidoreductase core subunit 5 pseudogene 32	0.475766	-3.95814	4.67466	-0.846722	0.39715	0.73882
ENSG00000187013	C17orf82	lincRNA	chromosome 17 open reading frame 82	516.835	-0.374368	0.321341	-1.16502	0.244011	0.597776
ENSG00000279390	AF127577.6	TEC		1.32757	-20.2651	4.64741	-4.36051	1.29761e-05	0.000418035
ENSG00000184414	IRS3P	processed_pseudogene	insulin receptor substrate 3, pseudogene	17.9258	2.29254	1.36455	1.68008	0.0929424	0.330539
ENSG00000064932	SBNO2	protein_coding	strawberry notch homolog 2	26863.8	-0.544002	0.171387	-3.17411	0.00150296	0.0117078
ENSG00000104870	FCGRT	protein_coding	Fc fragment of IgG receptor and transporter	18639.1	0.0743302	0.261063	0.284721	0.775858	0.967086
ENSG00000249115	HAUS5	protein_coding	HAUS augmin like complex subunit 5	3803.29	-0.987455	0.196611	-5.02237	5.10375e-07	3.09737e-05
ENSG00000136367	ZFHX2	protein_coding	zinc finger homeobox 2	37.1874	-0.189938	1.62525	-0.116867	0.906966	0.996331
ENSG00000232187	FTH1P7	processed_pseudogene	ferritin heavy chain 1 pseudogene 7	3786.09	0.0628999	0.199969	0.314548	0.753105	0.959001
ENSG00000204659	CBY3	protein_coding	chibby family member 3	0.976602	-4.18705	4.57845	-0.914513	0.360447	0.712076
ENSG00000233452	STXBP5-AS1	antisense	STXBP5 antisense RNA 1	56.6711	0.66614	0.619671	1.07499	0.282379	0.645086
ENSG00000173545	ZNF622	protein_coding	zinc finger protein 622	3151.61	0.369797	0.208588	1.77286	0.076252	0.287584
ENSG00000162601	MYSM1	protein_coding	Myb like, SWIRM and MPN domains 1	210.89	-0.480961	0.55099	-0.872903	0.382716	0.726097
ENSG00000163380	LMOD3	protein_coding	leiomodin 3	2.0069	-3.68608	4.58906	-0.803233	0.42184	0.757681
ENSG00000138772	ANXA3	protein_coding	annexin A3	78.3462	5.01911	1.39803	3.59012	0.00033052	0.00338297
ENSG00000254595	AC084337.1	processed_pseudogene		7.77161	-1.34622	2.73611	-0.492019	0.622706	0.895971
ENSG00000214300	SPDYE3	protein_coding	speedy/RINGO cell cycle regulator family member E3	185.524	0.0979167	0.357687	0.27375	0.784277	0.970028
ENSG00000269946	AL158152.2	lincRNA		5.24385	-0.295312	2.45704	-0.12019	0.904333	0.996331
ENSG00000186567	CEACAM19	protein_coding	carcinoembryonic antigen related cell adhesion molecule 19	12.9934	2.13182	1.16281	1.83334	0.0667521	0.261228
ENSG00000267751	AC009005.1	antisense		49.0066	-1.34981	1.19332	-1.13114	0.257997	0.615116
ENSG00000184220	CMSS1	protein_coding	cms1 ribosomal small subunit homolog (yeast)	268.965	0.153502	0.664141	0.231128	0.817215	0.979214
ENSG00000236217	C1DP2	processed_pseudogene	C1D nuclear receptor corepressor pseudogene 2	3.72429	2.70295	4.52256	0.59766	0.550067	0.851563
ENSG00000055070	SZRD1	protein_coding	SUZ RNA binding domain containing 1	37584.4	0.419789	0.469794	0.89356	0.371558	0.719575
ENSG00000087495	PHACTR3	protein_coding	phosphatase and actin regulator 3	17.682	0.911592	2.00401	0.454885	0.649192	0.910204
ENSG00000260490	MYL12BP1	processed_pseudogene	myosin light chain 12B pseudogene 1	15.3135	-1.28447	1.40403	-0.914848	0.360272	0.712031
ENSG00000121957	GPSM2	protein_coding	G protein signaling modulator 2	911.05	-0.21015	0.470086	-0.447046	0.654842	0.912905
ENSG00000169246	NPIPB3	protein_coding	nuclear pore complex interacting protein family member B3	151.797	-1.06155	0.692355	-1.53324	0.125216	0.400847
ENSG00000140521	POLG	protein_coding	DNA polymerase gamma, catalytic subunit	11294.2	-0.310962	0.205926	-1.51007	0.131026	0.412898
ENSG00000218052	ADAMTS7P4	transcribed_unprocessed_pseudogene	ADAMTS7 pseudogene 4	3.59798	-3.12584	4.54507	-0.687743	0.491615	0.810749
ENSG00000140443	IGF1R	protein_coding	insulin like growth factor 1 receptor	3408.79	-0.160447	0.269155	-0.596116	0.551098	0.852553
ENSG00000279207	AC015813.6	TEC		114.721	0.285528	0.784028	0.364181	0.715723	0.943934
ENSG00000267024	AC008747.1	antisense		0.390837	16.8928	4.64731	3.63497	0.000278012	0.0029825
ENSG00000155926	SLA	protein_coding	Src like adaptor	3.76526	1.16779	4.56925	0.255577	0.798278	0.973702
ENSG00000104872	PIH1D1	protein_coding	PIH1 domain containing 1	7021.44	-0.316102	0.242946	-1.30112	0.193218	0.522996
ENSG00000272970	AC107294.2	lincRNA		1.73397	-4.00996	4.58176	-0.8752	0.381465	0.725208
ENSG00000227101	AC025822.1	lincRNA		3.74906	-1.11749	4.47661	-0.249628	0.802875	0.974666
ENSG00000200494	RF00019	misc_RNA		1.24777	-0.576145	3.65376	-0.157685	0.874705	0.993609
ENSG00000172809	RPL38	protein_coding	ribosomal protein L38	10190.3	0.191001	0.188841	1.01144	0.311806	0.672457
ENSG00000151576	QTRT2	protein_coding	queuine tRNA-ribosyltransferase accessory subunit 2	428.074	-0.516809	0.308442	-1.67555	0.0938265	0.332425
ENSG00000225555	AP000320.1	antisense		1.25241	-17.8106	4.62144	-3.85391	0.000116246	0.00177258
ENSG00000140319	SRP14	protein_coding	signal recognition particle 14	2710.23	0.510652	0.308793	1.6537	0.0981882	0.342929
ENSG00000242349	NPPA-AS1	antisense	NPPA antisense RNA 1	27.8259	0.193095	1.38059	0.139864	0.888767	0.995583
ENSG00000127947	PTPN12	protein_coding	protein tyrosine phosphatase, non-receptor type 12	603.247	-0.279338	0.30369	-0.919812	0.357671	0.709328
ENSG00000178297	TMPRSS9	protein_coding	transmembrane serine protease 9	5.03497	-1.90714	3.08368	-0.618462	0.536271	0.842627
ENSG00000261121	LINC02473	lincRNA	long intergenic non-protein coding RNA 2473	1.90199	16.4752	4.61989	3.56614	0.000362277	0.00359886
ENSG00000106615	RHEB	protein_coding	Ras homolog, mTORC1 binding	5443.92	0.187044	0.222402	0.841019	0.400337	0.741155
ENSG00000100302	RASD2	protein_coding	RASD family member 2	7.19052	4.46456	2.88747	1.54618	0.12206	0.394319
ENSG00000111371	SLC38A1	protein_coding	solute carrier family 38 member 1	109.092	3.2352	1.17131	2.76204	0.0057441	0.0371343
ENSG00000117242	PINK1-AS	antisense	PINK1 antisense RNA	5892.7	0.363213	0.211127	1.72035	0.0853682	0.311948
ENSG00000255875	AC008813.1	processed_pseudogene		0.476048	15.4077	4.64148	3.31958	0.000901537	0.00755644
ENSG00000228007	AC011933.1	processed_pseudogene		11.8246	1.63305	1.44978	1.12642	0.25999	0.618029
ENSG00000270800	RPS10-NUDT3	protein_coding	RPS10-NUDT3 readthrough	279.867	3.52146	1.19267	2.95259	0.00315122	0.022234
ENSG00000081692	JMJD4	protein_coding	jumonji domain containing 4	6492.21	-0.255152	0.522037	-0.488762	0.62501	0.897099
ENSG00000167371	PRRT2	protein_coding	proline rich transmembrane protein 2	93.0073	-0.0517377	0.443021	-0.116784	0.907031	0.996331
ENSG00000228925	AC016722.2	antisense		14.3093	-4.94382	1.9144	-2.58244	0.00981047	0.0585598
ENSG00000227252	AC105760.2	antisense		45.9906	1.25849	1.17256	1.07328	0.283144	0.645964
ENSG00000275881	RF00017	misc_RNA		0.489343	-1.86032	4.62723	-0.402038	0.687656	0.930061
ENSG00000231006	RPL7P32	processed_pseudogene	ribosomal protein L7 pseudogene 32	79.624	0.986701	0.521644	1.89152	0.0585547	0.238919
ENSG00000160949	TONSL	protein_coding	tonsoku like, DNA repair protein	19382.5	-0.836474	0.238198	-3.51167	0.000445299	0.00417548
ENSG00000267573	KRT8P5	processed_pseudogene	keratin 8 pseudogene 5	0.667543	11.9427	4.64697	2.57	0.0101697	0.060342
ENSG00000179195	ZNF664	protein_coding	zinc finger protein 664	1987.39	0.330072	0.647052	0.510116	0.60997	0.889549
ENSG00000230568	SF3A3P1	processed_pseudogene	splicing factor 3a, subunit 3 pseudogene 1	12.7976	0.548277	1.3598	0.403205	0.686797	0.929592
ENSG00000105397	TYK2	protein_coding	tyrosine kinase 2	25067.8	-0.735308	0.209576	-3.50855	0.000450561	0.00421322
ENSG00000134183	GNAT2	protein_coding	G protein subunit alpha transducin 2	1.03177	-0.72184	4.63411	-0.155767	0.876217	0.993899
ENSG00000253509	AC104393.1	sense_intronic		0.41578	-18.1081	4.6474	-3.89639	9.76353e-05	0.0016124
ENSG00000230615	AL139220.2	lincRNA		18.0576	-0.369455	1.37111	-0.269457	0.787578	0.970971
ENSG00000136770	DNAJC1	protein_coding	DnaJ heat shock protein family (Hsp40) member C1	540.002	0.455983	0.36825	1.23824	0.215626	0.55751
ENSG00000161912	ADCY10P1	transcribed_unprocessed_pseudogene	adenylate cyclase 10, soluble pseudogene 1	22.2943	0.231489	1.00892	0.229443	0.818525	0.979519
ENSG00000144199	FAHD2B	protein_coding	fumarylacetoacetate hydrolase domain containing 2B	3621.77	-0.197196	0.243261	-0.810634	0.417576	0.754599
ENSG00000258100	AC025035.1	lincRNA		0.507794	16.2302	4.64712	3.49252	0.000478489	0.00441307
ENSG00000075131	TIPIN	protein_coding	TIMELESS interacting protein	263.62	-0.19021	0.54402	-0.349639	0.72661	0.948201
ENSG00000246363	LINC02458	lincRNA	long intergenic non-protein coding RNA 2458	8.63803	1.03768	2.57122	0.403576	0.686525	0.929464
ENSG00000184274	LINC00315	lincRNA	long intergenic non-protein coding RNA 315	16.823	0.663923	1.92636	0.344651	0.730357	0.950042
ENSG00000100804	PSMB5	protein_coding	proteasome subunit beta 5	21442.1	0.0589556	0.281694	0.20929	0.834222	0.983785
ENSG00000161267	BDH1	protein_coding	3-hydroxybutyrate dehydrogenase 1	2722.55	-0.847555	0.155393	-5.45428	4.91727e-08	4.57306e-06
ENSG00000143437	ARNT	protein_coding	aryl hydrocarbon receptor nuclear translocator	2933.65	0.0525696	0.184184	0.285419	0.775323	0.966945
ENSG00000258136	AC007622.2	antisense		3.20628	-0.699088	3.76119	-0.185869	0.852548	0.988413
ENSG00000225439	BOLA3-AS1	antisense	BOLA3 antisense RNA 1 (head to head)	631.26	0.0307805	0.389431	0.0790398	0.937001	0.996331
ENSG00000144749	LRIG1	protein_coding	leucine rich repeats and immunoglobulin like domains 1	805.46	0.605877	0.28437	2.13059	0.0331227	0.155925
ENSG00000134250	NOTCH2	protein_coding	notch 2	9414.49	0.343944	0.273333	1.25834	0.20827	0.546897
ENSG00000116833	NR5A2	protein_coding	nuclear receptor subfamily 5 group A member 2	64.5196	3.22626	1.21513	2.65508	0.00792889	0.0489364
ENSG00000140104	CLBA1	protein_coding	clathrin binding box of aftiphilin containing 1	1209.11	0.32307	0.215098	1.50197	0.133104	0.416366
ENSG00000273381	AL158071.4	lincRNA		0.8783	4.38899	4.57888	0.958529	0.337796	0.695538
ENSG00000004700	RECQL	protein_coding	RecQ like helicase	398.949	0.0521386	0.521181	0.100039	0.920313	0.996331
ENSG00000141560	FN3KRP	protein_coding	fructosamine 3 kinase related protein	6390.89	-0.110363	0.196054	-0.562922	0.573488	0.867731
ENSG00000282602	Z82244.2	lincRNA		2.6209	0.71261	4.62471	0.154087	0.877541	0.993899
ENSG00000246465	AC138904.1	lincRNA		4.89449	2.80655	4.2103	0.666592	0.505033	0.821423
ENSG00000228612	HK2P1	processed_pseudogene	hexokinase 2 pseudogene 1	9.92901	1.19443	1.3067	0.914084	0.360673	0.712076
ENSG00000137726	FXYD6	protein_coding	FXYD domain containing ion transport regulator 6	5739.59	-0.714421	0.217319	-3.28744	0.00101105	0.00834847
ENSG00000279630	AC190387.1	TEC		0.787734	2.18209	4.63685	0.470598	0.637928	0.903121
ENSG00000237506	RPSAP15	processed_pseudogene	ribosomal protein SA pseudogene 15	2144.42	-0.287059	0.203126	-1.41321	0.157594	0.462099
ENSG00000159111	MRPL10	protein_coding	mitochondrial ribosomal protein L10	6864.09	-0.491739	0.309536	-1.58863	0.112143	0.372793
ENSG00000235459	RPS26P31	processed_pseudogene	ribosomal protein S26 pseudogene 31	25.4107	0.161325	0.584548	0.275983	0.782561	0.969328
ENSG00000232487	RASA3-IT1	sense_intronic	RASA3 intronic transcript 1	13.9247	2.8623	1.48819	1.92334	0.0544373	0.226571
ENSG00000240527	AL365273.1	sense_intronic		33.9083	0.670411	1.01491	0.660564	0.508892	0.823341
ENSG00000163291	PAQR3	protein_coding	progestin and adipoQ receptor family member 3	621.966	0.0452212	0.509905	0.0886854	0.929332	0.996331
ENSG00000113657	DPYSL3	protein_coding	dihydropyrimidinase like 3	433.364	0.368461	0.35324	1.04309	0.296907	0.659742
ENSG00000169429	CXCL8	protein_coding	C-X-C motif chemokine ligand 8	1982.99	3.86671	0.927582	4.16859	3.06491e-05	0.000773293
ENSG00000025770	NCAPH2	protein_coding	non-SMC condensin II complex subunit H2	22559.8	-0.506203	0.234719	-2.15664	0.0310341	0.148463
ENSG00000237574	LINC01856	lincRNA	long intergenic non-protein coding RNA 1856	0.390757	-4.31242	4.67466	-0.922509	0.356263	0.707773
ENSG00000240342	RPS2P5	processed_pseudogene	ribosomal protein S2 pseudogene 5	51779.5	-0.372433	0.179049	-2.08007	0.0375193	0.171393
ENSG00000270733	AL355877.2	processed_pseudogene		1.05218	0.490615	4.62144	0.106161	0.915455	0.996331
ENSG00000163297	ANTXR2	protein_coding	anthrax toxin receptor 2	229.106	-0.0207395	0.371523	-0.055823	0.955483	0.996331
ENSG00000284471	CR769775.4	TEC		5.39932	4.49464	3.74144	1.20131	0.22963	0.578406
ENSG00000034053	APBA2	protein_coding	amyloid beta precursor protein binding family A member 2	2612.68	-0.388314	0.301294	-1.28882	0.19746	0.529899
ENSG00000173436	MINOS1	protein_coding	mitochondrial inner membrane organizing system 1	3275.15	0.213519	0.190761	1.1193	0.263013	0.620828
ENSG00000197852	FAM212B	protein_coding	family with sequence similarity 212 member B	490.3	-0.591876	0.607652	-0.974039	0.330037	0.688131
ENSG00000163536	SERPINI1	protein_coding	serpin family I member 1	142.245	1.93834	1.25653	1.54262	0.122923	0.396468
ENSG00000197054	ZNF763	protein_coding	zinc finger protein 763	14.0581	2.91357	1.70724	1.7066	0.087897	0.318117
ENSG00000198833	UBE2J1	protein_coding	ubiquitin conjugating enzyme E2 J1	3034.97	0.130354	0.286353	0.455223	0.648949	0.910052
ENSG00000267365	KCNJ2-AS1	antisense	KCNJ2 antisense RNA 1 (head to head)	18.9362	1.49167	1.53867	0.969457	0.332317	0.690454
ENSG00000163508	EOMES	protein_coding	eomesodermin	228.863	0.814128	0.562322	1.4478	0.147674	0.444341
ENSG00000270482	AC026367.1	lincRNA		0.759449	15.4148	4.63161	3.32818	0.000874163	0.00735869
ENSG00000258572	AL133467.1	lincRNA		15.1698	2.26466	1.27279	1.77929	0.0751922	0.285046
ENSG00000260992	DOCK9-AS2	antisense	DOCK9 antisense RNA 2 (head to head)	33.8454	-0.0396772	0.772291	-0.051376	0.959026	0.996331
ENSG00000167807	AC011511.1	protein_coding		757.432	0.857632	0.434194	1.97523	0.0482422	0.20669
ENSG00000183578	TNFAIP8L3	protein_coding	TNF alpha induced protein 8 like 3	1.89883	-19.2312	4.61889	-4.16359	3.13284e-05	0.000781747
ENSG00000265222	AC079336.2	sense_intronic		57.8136	-0.152609	0.960744	-0.158845	0.873791	0.993347
ENSG00000124664	SPDEF	protein_coding	SAM pointed domain containing ETS transcription factor	3.14459	-11.0933	4.67466	-2.37308	0.0176407	0.0949606
ENSG00000116299	KIAA1324	protein_coding	KIAA1324	490.544	4.57095	0.881475	5.18556	2.15362e-07	1.51248e-05
ENSG00000263335	AF001548.2	antisense		56.7977	-0.972513	2.06051	-0.471976	0.636944	0.902257
ENSG00000277775	HIST1H3F	protein_coding	histone cluster 1 H3 family member f	22.2864	-0.0806408	1.38757	-0.0581165	0.953656	0.996331
ENSG00000142233	NTN5	protein_coding	netrin 5	5.61435	-1.4386	3.25225	-0.442338	0.658244	0.914315
ENSG00000139890	REM2	protein_coding	RRAD and GEM like GTPase 2	23.3255	3.54849	2.00132	1.77308	0.0762162	0.287488
ENSG00000170743	SYT9	protein_coding	synaptotagmin 9	1.11497	17.9302	4.62361	3.87797	0.000105332	0.00168602
ENSG00000196581	AJAP1	protein_coding	adherens junctions associated protein 1	4.75406	1.03486	4.51574	0.229168	0.818739	0.979606
ENSG00000189052	CGB5	protein_coding	chorionic gonadotropin beta subunit 5	4.36052	1.11639	4.61749	0.241774	0.808956	0.976574
ENSG00000143384	MCL1	protein_coding	MCL1, BCL2 family apoptosis regulator	8184.55	0.540138	0.240091	2.24972	0.0244668	0.123234
ENSG00000260007	AC107871.1	protein_coding		206.686	-0.925166	0.694642	-1.33186	0.182906	0.505991
ENSG00000223876	RPS27P1	processed_pseudogene	ribosomal protein S27 pseudogene 1	0.40066	16.5795	4.64681	3.56792	0.000359822	0.00357839
ENSG00000283684	AC013268.5	processed_transcript		188.81	1.7651	1.03561	1.70441	0.0883045	0.319253
ENSG00000162692	VCAM1	protein_coding	vascular cell adhesion molecule 1	108.041	8.07049	2.13231	3.78487	0.000153791	0.00209543
ENSG00000132429	POPDC3	protein_coding	popeye domain containing 3	652.245	0.489991	0.237526	2.0629	0.0391222	0.176563
ENSG00000240395	RPL5P23	processed_pseudogene	ribosomal protein L5 pseudogene 23	28.4355	-1.1895	0.862899	-1.37849	0.168052	0.481467
ENSG00000261195	AC027130.1	antisense		116.027	-0.902929	0.719479	-1.25498	0.209488	0.548772
ENSG00000269737	AL691432.1	transcribed_processed_pseudogene		98.8098	0.216303	0.667459	0.32407	0.745885	0.956052
ENSG00000177169	ULK1	protein_coding	unc-51 like autophagy activating kinase 1	11235.6	-0.0950112	0.181399	-0.52377	0.600439	0.883633
ENSG00000226783	TLK1P1	processed_pseudogene	tousled like kinase 1 pseudogene 1	1.12805	-23.0603	4.61992	-4.9915	5.99118e-07	3.53363e-05
ENSG00000162694	EXTL2	protein_coding	exostosin like glycosyltransferase 2	673.96	0.527747	0.482926	1.09281	0.274477	0.634855
ENSG00000185630	PBX1	protein_coding	PBX homeobox 1	530.911	0.917503	0.373137	2.45889	0.0139368	0.078304
ENSG00000188186	LAMTOR4	protein_coding	late endosomal/lysosomal adaptor, MAPK and MTOR activator 4	6993.81	-0.29593	0.20275	-1.45958	0.144406	0.43848
ENSG00000122068	FYTTD1	protein_coding	forty-two-three domain containing 1	1418.83	0.446784	0.549765	0.812683	0.4164	0.754152
ENSG00000235961	PNMA6A	protein_coding	PNMA family member 6A	6444.21	0.69948	0.227305	3.07727	0.00208904	0.0155744
ENSG00000278107	AC027575.2	lincRNA		22.6626	1.49968	1.40797	1.06514	0.286812	0.649817
ENSG00000146221	TCTE1	protein_coding	t-complex-associated-testis-expressed 1	1.30493	0.851679	4.58159	0.185892	0.85253	0.988413
ENSG00000168243	GNG4	protein_coding	G protein subunit gamma 4	220.968	2.49416	0.922745	2.70298	0.00687212	0.0433228
ENSG00000253522	MIR3142HG	lincRNA	MIR3142 host gene	208.192	-0.286571	0.823333	-0.348062	0.727793	0.948602
ENSG00000182747	SLC35D3	protein_coding	solute carrier family 35 member D3	2.86848	19.6809	4.61878	4.26107	2.03454e-05	0.000586037
ENSG00000186480	INSIG1	protein_coding	insulin induced gene 1	3694.43	-0.504651	0.295915	-1.70539	0.0881212	0.318759
ENSG00000284630	AP000553.5	transcribed_unitary_pseudogene		18.3513	0.436851	1.61917	0.269799	0.787315	0.97088
ENSG00000145949	MYLK4	protein_coding	myosin light chain kinase family member 4	23.8978	1.26018	1.83204	0.687858	0.491542	0.810728
ENSG00000143382	ADAMTSL4	protein_coding	ADAMTS like 4	537.207	-0.56583	0.353662	-1.59992	0.109617	0.367405
ENSG00000221916	C19orf73	protein_coding	chromosome 19 open reading frame 73	73.9116	0.62623	0.580499	1.07878	0.280687	0.64278
ENSG00000154556	SORBS2	protein_coding	sorbin and SH3 domain containing 2	199.783	2.557	0.84276	3.03407	0.00241276	0.0176497
ENSG00000256150	AC092471.2	processed_transcript		10.8521	-3.33667	2.01303	-1.65754	0.0974106	0.341394
ENSG00000256229	ZNF486	protein_coding	zinc finger protein 486	71.206	-0.123302	0.844262	-0.146046	0.883885	0.995334
ENSG00000119522	DENND1A	protein_coding	DENN domain containing 1A	3607.9	0.340209	0.284487	1.19587	0.231747	0.581153
ENSG00000154451	GBP5	protein_coding	guanylate binding protein 5	188.525	4.95012	1.21636	4.06963	4.70879e-05	0.00101151
ENSG00000155275	TRMT44	protein_coding	tRNA methyltransferase 44 homolog	822.345	0.229453	0.30019	0.764358	0.444654	0.774504
ENSG00000118849	RARRES1	protein_coding	retinoic acid receptor responder 1	44.3042	3.12068	1.32881	2.34848	0.0188502	0.100381
ENSG00000106610	STAG3L4	transcribed_unprocessed_pseudogene	stromal antigen 3-like 4 (pseudogene)	592.017	-0.246245	0.294921	-0.834952	0.403745	0.744103
ENSG00000112619	PRPH2	protein_coding	peripherin 2	12.9215	-1.66288	1.96366	-0.846828	0.397091	0.73882
ENSG00000184351	KRTAP19-1	protein_coding	keratin associated protein 19-1	125.014	0.697178	0.493668	1.41224	0.157879	0.462437
ENSG00000243649	CFB	protein_coding	complement factor B	4.95266	16.8433	4.61828	3.64709	0.000265224	0.00289324
ENSG00000282897	AL162727.3	TEC		14.1419	0.294862	2.24884	0.131117	0.895683	0.996331
ENSG00000229001	ACTBP14	processed_pseudogene	actin, beta pseudogene 14	0.770582	1.22702	4.60903	0.266222	0.790069	0.971863
ENSG00000264304	AC024267.3	antisense		9.8989	-2.38517	2.24647	-1.06174	0.288353	0.651833
ENSG00000241014	AC114490.1	transcribed_unitary_pseudogene		7.65934	2.71042	1.72382	1.57233	0.115874	0.381244
ENSG00000246145	RRS1-AS1	lincRNA	RRS1 antisense RNA 1 (head to head)	0.833995	-4.39138	4.67466	-0.9394	0.347526	0.703337
ENSG00000153107	ANAPC1	protein_coding	anaphase promoting complex subunit 1	1505.11	-0.280771	0.388686	-0.722359	0.470074	0.795626
ENSG00000275582	AL031670.1	antisense		22.5232	-2.05839	1.45049	-1.4191	0.15587	0.458679
ENSG00000224773	HSPA8P7	processed_pseudogene	heat shock protein family A (Hsp70) member 8 pseudogene 7	1.7727	14.0751	4.65193	3.02565	0.00248095	0.0180661
ENSG00000129596	CDO1	protein_coding	cysteine dioxygenase type 1	14.9993	1.8847	2.88318	0.653687	0.513314	0.826599
ENSG00000141505	ASGR1	protein_coding	asialoglycoprotein receptor 1	7.75487	1.74801	3.39784	0.514449	0.606938	0.88759
ENSG00000273345	AC104109.4	processed_transcript		7.4489	-1.30598	2.49463	-0.523517	0.600615	0.883688
ENSG00000064419	TNPO3	protein_coding	transportin 3	3038.24	-0.186334	0.300406	-0.620274	0.535077	0.84183
ENSG00000165282	PIGO	protein_coding	phosphatidylinositol glycan anchor biosynthesis class O	10020.3	-0.11453	0.26373	-0.43427	0.664093	0.917361
ENSG00000236156	CHCHD4P3	processed_pseudogene	coiled-coil-helix-coiled-coil-helix domain containing 4 pseudogene 3	27.6681	-1.09462	1.34864	-0.811644	0.416996	0.754396
ENSG00000170906	NDUFA3	protein_coding	NADH:ubiquinone oxidoreductase subunit A3	17.1297	-5.93142	2.81712	-2.10549	0.0352486	0.163485
ENSG00000270344	POC1B-AS1	antisense	POC1B antisense RNA 1	13.2277	0.37274	1.25062	0.298044	0.76567	0.963994
ENSG00000259417	CTXND1	protein_coding	cortexin domain containing 1	1120.28	-0.353647	0.23087	-1.5318	0.125572	0.401419
ENSG00000206702	RNU1-11P	snRNA	RNA, U1 small nuclear 11, pseudogene	0.477081	-18.109	4.64628	-3.89752	9.71839e-05	0.0016124
ENSG00000268746	AC010519.1	lincRNA		3.7858	0.518926	2.87181	0.180697	0.856606	0.989386
ENSG00000265590	AP000275.2	protein_coding		17.0384	-2.23528	2.31692	-0.964763	0.334664	0.693144
ENSG00000182487	NCF1B	transcribed_unprocessed_pseudogene	neutrophil cytosolic factor 1B pseudogene	1.16119	-3.97465	4.67466	-0.850254	0.395184	0.737862
ENSG00000148200	NR6A1	protein_coding	nuclear receptor subfamily 6 group A member 1	284.932	-0.0738474	0.405619	-0.182061	0.855535	0.989095
ENSG00000224117	PTPN2P2	processed_pseudogene	protein tyrosine phosphatase, non-receptor type 2 pseudogene 2	0.744237	0.969053	4.59486	0.210899	0.832966	0.983583
ENSG00000199785	SNORA52	snoRNA	small nucleolar RNA, H/ACA box 52	17.1557	-0.68065	1.01542	-0.670312	0.502659	0.819482
ENSG00000261229	AC021483.2	lincRNA		4.9773	-2.12844	2.53876	-0.838378	0.401818	0.742416
ENSG00000155254	MARVELD1	protein_coding	MARVEL domain containing 1	65546	-0.3253	0.266918	-1.21872	0.222949	0.569046
ENSG00000224763	FDPSP8	processed_pseudogene	farnesyl diphosphate synthase pseudogene 8	0.788875	-0.546733	4.62848	-0.118124	0.90597	0.996331
ENSG00000157184	CPT2	protein_coding	carnitine palmitoyltransferase 2	4135.24	0.564688	0.218596	2.58325	0.00978738	0.0584713
ENSG00000197815	AC122129.1	antisense		114.009	-0.378827	0.696919	-0.543574	0.586735	0.876075
ENSG00000167699	GLOD4	protein_coding	glyoxalase domain containing 4	3541.29	0.236394	0.31385	0.753208	0.451325	0.779755
ENSG00000155252	PI4K2A	protein_coding	phosphatidylinositol 4-kinase type 2 alpha	15132.1	0.0974292	0.205612	0.47385	0.635607	0.901798
ENSG00000275072	SNORD50B	snoRNA	small nucleolar RNA, C/D box 50B	0.723724	0.913023	3.19287	0.285957	0.774911	0.966896
ENSG00000134986	NREP	protein_coding	neuronal regeneration related protein	125.57	0.746169	0.541329	1.3784	0.168079	0.481478
ENSG00000198517	MAFK	protein_coding	MAF bZIP transcription factor K	18038.8	-0.178866	0.339744	-0.526474	0.598559	0.882487
ENSG00000100802	C14orf93	protein_coding	chromosome 14 open reading frame 93	801.445	-0.472337	0.345621	-1.36663	0.17174	0.488439
ENSG00000115556	PLCD4	protein_coding	phospholipase C delta 4	1166.8	-0.403022	0.210751	-1.91231	0.0558361	0.230719
ENSG00000054523	KIF1B	protein_coding	kinesin family member 1B	1639.9	0.528177	0.251622	2.09909	0.0358093	0.1653
ENSG00000026297	RNASET2	protein_coding	ribonuclease T2	845.529	0.0626882	0.16791	0.373345	0.708892	0.939988
ENSG00000138326	RPS24	protein_coding	ribosomal protein S24	4583.34	0.282163	0.286132	0.98613	0.324069	0.682773
ENSG00000165323	FAT3	protein_coding	FAT atypical cadherin 3	3.18027	1.77479	4.62041	0.384119	0.70089	0.936615
ENSG00000257647	AC124312.2	lincRNA		0.401665	-4.62433	4.67466	-0.989232	0.32255	0.68129
ENSG00000213445	SIPA1	protein_coding	signal-induced proliferation-associated 1	19899.9	-0.175699	0.228152	-0.770096	0.441243	0.7725
ENSG00000262803	AL354943.1	processed_pseudogene		0.268278	-4.37146	4.67466	-0.935139	0.349717	0.703637
ENSG00000116688	MFN2	protein_coding	mitofusin 2	20148.6	-0.201295	0.241717	-0.832772	0.404973	0.744727
ENSG00000204282	TNRC6C-AS1	processed_transcript	TNRC6C antisense RNA 1	351.83	-0.604619	0.406066	-1.48897	0.136496	0.423961
ENSG00000184434	LRRC19	protein_coding	leucine rich repeat containing 19	4.32147	-0.386403	3.89072	-0.0993143	0.920889	0.996331
ENSG00000225602	MTOR-AS1	antisense	MTOR antisense RNA 1	0.623875	-18.9062	4.646	-4.06935	4.71439e-05	0.00101151
ENSG00000165325	DEUP1	protein_coding	deuterosome assembly protein 1	2.94641	5.85334	4.54497	1.28787	0.197791	0.530472
ENSG00000076067	RBMS2	protein_coding	RNA binding motif single stranded interacting protein 2	1949.75	-0.22417	0.380935	-0.588474	0.556214	0.856351
ENSG00000185565	LSAMP	protein_coding	limbic system-associated membrane protein	1066.18	0.738907	0.225025	3.28367	0.00102467	0.00844312
ENSG00000163682	RPL9	protein_coding	ribosomal protein L9	9388	0.0650407	0.165222	0.393656	0.693835	0.932948
ENSG00000174946	GPR171	protein_coding	G protein-coupled receptor 171	0.238469	-4.72762	4.67466	-1.01133	0.311859	0.672457
ENSG00000232762	AL355483.3	antisense		1.64146	-24.1018	4.67466	-5.15585	2.52489e-07	1.72002e-05
ENSG00000276412	AL591926.3	processed_pseudogene		1.02187	0.727964	4.62224	0.157492	0.874857	0.993609
ENSG00000111846	GCNT2	protein_coding	glucosaminyl (N-acetyl) transferase 2, I-branching enzyme (I blood group)	2233.36	-0.216943	0.351742	-0.616766	0.537389	0.842878
ENSG00000266976	AC079466.1	lincRNA		1.12691	6.45267	4.56895	1.41229	0.157865	0.462437
ENSG00000136490	LIMD2	protein_coding	LIM domain containing 2	10187.4	0.287511	0.247673	1.16085	0.245702	0.599976
ENSG00000184209	SNRNP35	protein_coding	small nuclear ribonucleoprotein U11/U12 subunit 35	2010.99	0.298917	0.153818	1.94332	0.0519774	0.21873
ENSG00000136485	DCAF7	protein_coding	DDB1 and CUL4 associated factor 7	17620.8	-0.192345	0.201797	-0.953163	0.340508	0.698103
ENSG00000279311	AC092999.1	TEC		2.04702	-0.0467634	4.57774	-0.0102154	0.991849	0.998651
ENSG00000258323	AC073575.1	antisense		0.287318	-17.9338	4.64704	-3.85919	0.000113763	0.00174743
ENSG00000155366	RHOC	protein_coding	ras homolog family member C	29540.2	0.300299	0.206834	1.45188	0.146534	0.442391
ENSG00000064309	CDON	protein_coding	cell adhesion associated, oncogene regulated	865.007	-0.177581	0.238892	-0.743353	0.457268	0.784715
ENSG00000013306	SLC25A39	protein_coding	solute carrier family 25 member 39	42718.3	-0.113799	0.188466	-0.603821	0.545963	0.84885
ENSG00000120742	SERP1	protein_coding	stress associated endoplasmic reticulum protein 1	5328.99	-0.0963286	0.20203	-0.476803	0.633502	0.901256
ENSG00000101290	CDS2	protein_coding	CDP-diacylglycerol synthase 2	12519.9	-0.202519	0.189483	-1.06879	0.285163	0.648181
ENSG00000229558	SACS-AS1	lincRNA	SACS antisense RNA 1	0.869931	-1.07795	4.62994	-0.232821	0.8159	0.978934
ENSG00000137507	LRRC32	protein_coding	leucine rich repeat containing 32	31.5679	2.53766	1.64682	1.54095	0.12333	0.397423
ENSG00000279758	AC105339.5	TEC		1.00866	1.0353	4.57417	0.226337	0.82094	0.980222
ENSG00000172795	DCP2	protein_coding	decapping mRNA 2	481.427	0.665411	0.558113	1.19225	0.233163	0.582993
ENSG00000231952	DPY19L1P2	unprocessed_pseudogene	DPY19L1 pseudogene 2	1.45782	-19.0901	4.61957	-4.13245	3.58921e-05	0.000863217
ENSG00000223485	LINC01615	lincRNA	long intergenic non-protein coding RNA 1615	23.701	2.17541	1.70189	1.27823	0.201167	0.536518
ENSG00000198183	BPIFA1	protein_coding	BPI fold containing family A member 1	13.4167	7.16179	3.4854	2.0548	0.0398987	0.179524
ENSG00000244515	KRT18P34	processed_pseudogene	keratin 18 pseudogene 34	5.63839	0.878512	2.71746	0.323284	0.74648	0.95607
ENSG00000131115	ZNF227	protein_coding	zinc finger protein 227	117.582	0.392514	0.650332	0.603559	0.546137	0.848904
ENSG00000221923	ZNF880	protein_coding	zinc finger protein 880	135.95	-1.40779	0.444749	-3.16535	0.00154896	0.0120147
ENSG00000272650	AC110792.3	lincRNA		1.42554	13.4872	4.65692	2.89616	0.00377762	0.0259875
ENSG00000258378	AL139021.1	antisense		0.356142	16.5246	4.64703	3.55594	0.000376625	0.00365089
ENSG00000196341	OR8D1	protein_coding	olfactory receptor family 8 subfamily D member 1	0.738115	0.154218	4.67466	0.0329903	0.973682	0.996331
ENSG00000147677	EIF3H	protein_coding	eukaryotic translation initiation factor 3 subunit H	2548.02	0.175015	0.224522	0.7795	0.435685	0.768455
ENSG00000004838	ZMYND10	protein_coding	zinc finger MYND-type containing 10	351.956	-0.444992	0.345606	-1.28757	0.197895	0.530649
ENSG00000138778	CENPE	protein_coding	centromere protein E	7.81579	8.75483	3.84325	2.27797	0.0227281	0.116588
ENSG00000055332	EIF2AK2	protein_coding	eukaryotic translation initiation factor 2 alpha kinase 2	678.739	0.361173	0.478224	0.755238	0.450106	0.778801
ENSG00000272677	AC124016.1	antisense		32.0097	0.535919	1.14741	0.46707	0.64045	0.904744
ENSG00000012211	PRICKLE3	protein_coding	prickle planar cell polarity protein 3	2724.47	-0.280891	0.231644	-1.2126	0.225284	0.572165
ENSG00000173818	ENDOV	protein_coding	endonuclease V	1225.58	0.690049	0.258748	2.66688	0.00765586	0.0475637
ENSG00000205420	KRT6A	protein_coding	keratin 6A	0.44432	16.5515	4.6474	3.56146	0.000368796	0.00362529
ENSG00000149262	INTS4	protein_coding	integrator complex subunit 4	1001.73	0.368539	0.305136	1.20779	0.22713	0.574231
ENSG00000140416	TPM1	protein_coding	tropomyosin 1	1147.05	0.862055	0.368007	2.34249	0.0191553	0.101727
ENSG00000143409	MINDY1	protein_coding	MINDY lysine 48 deubiquitinase 1	5464.24	0.229352	0.25408	0.902674	0.366699	0.716324
ENSG00000158125	XDH	protein_coding	xanthine dehydrogenase	58.4193	2.6501	1.49133	1.777	0.0755686	0.285807
ENSG00000220494	YAP1P1	processed_pseudogene	Yes associated protein 1 pseudogene 1	1.19331	-8.63387	4.67466	-1.84695	0.0647544	0.256281
ENSG00000185614	FAM212A	protein_coding	family with sequence similarity 212 member A	1113.57	0.0381487	0.272458	0.140017	0.888647	0.995583
ENSG00000180776	ZDHHC20	protein_coding	zinc finger DHHC-type containing 20	1806.26	0.151277	0.400564	0.377659	0.705684	0.938604
ENSG00000224163	AC025594.1	unprocessed_pseudogene		1.24734	-2.53563	4.60297	-0.55087	0.581723	0.873643
ENSG00000273402	AC004908.3	antisense		3.10206	3.02958	4.59443	0.659403	0.509637	0.823804
ENSG00000116871	MAP7D1	protein_coding	MAP7 domain containing 1	50661.6	-0.421465	0.167909	-2.51008	0.0120705	0.0694341
ENSG00000250909	AC138956.1	antisense		3.66715	-7.7272	3.99205	-1.93565	0.0529111	0.221743
ENSG00000162909	CAPN2	protein_coding	calpain 2	9008.97	0.351001	0.289251	1.21348	0.224945	0.571689
ENSG00000167703	SLC43A2	protein_coding	solute carrier family 43 member 2	467.519	0.71821	0.442637	1.62257	0.104681	0.356957
ENSG00000137494	ANKRD42	protein_coding	ankyrin repeat domain 42	312.266	-0.0510352	0.323773	-0.157627	0.874751	0.993609
ENSG00000274111	MIR6777	miRNA	microRNA 6777	6.45894	1.18259	1.54168	0.76708	0.443034	0.773674
ENSG00000119714	GPR68	protein_coding	G protein-coupled receptor 68	15.7446	2.7595	2.22667	1.2393	0.215236	0.55703
ENSG00000279179	AL662907.2	TEC		59.0592	0.281783	0.638232	0.441506	0.658847	0.914549
ENSG00000136819	C9orf78	protein_coding	chromosome 9 open reading frame 78	1674.14	0.0160728	0.251042	0.0640243	0.948951	0.996331
ENSG00000186952	TMEM232	protein_coding	transmembrane protein 232	8.23402	2.6126	1.65807	1.57569	0.115098	0.379561
ENSG00000272667	AC012306.2	lincRNA		336.631	-0.438979	0.42141	-1.04169	0.297555	0.660584
ENSG00000183682	BMP8A	protein_coding	bone morphogenetic protein 8a	10.2221	1.80891	2.07471	0.871885	0.383271	0.726381
ENSG00000279588	AC087762.2	TEC		2.16031	14.3809	4.65292	3.09072	0.00199672	0.0149922
ENSG00000066117	SMARCD1	protein_coding	SWI/SNF related, matrix associated, actin dependent regulator of chromatin, subfamily d, member 1	6838.25	-0.923181	0.242909	-3.80052	0.000144392	0.00202365
ENSG00000103222	ABCC1	protein_coding	ATP binding cassette subfamily C member 1	2932.82	-0.484175	0.295916	-1.63619	0.101799	0.350598
ENSG00000214278	AC010442.2	processed_pseudogene		0.356383	-17.6543	4.64777	-3.79844	0.000145607	0.00202365
ENSG00000269984	AC078795.1	antisense		10.9845	-1.79542	2.46193	-0.729271	0.465836	0.791655
ENSG00000145192	AHSG	protein_coding	alpha 2-HS glycoprotein	0.950355	-19.5318	4.64615	-4.20387	2.62392e-05	0.000686173
ENSG00000105227	PRX	protein_coding	periaxin	1291.19	-0.926335	0.409719	-2.2609	0.0237654	0.12046
ENSG00000137496	IL18BP	protein_coding	interleukin 18 binding protein	460.829	1.48246	0.466073	3.18074	0.00146898	0.0114757
ENSG00000115415	STAT1	protein_coding	signal transducer and activator of transcription 1	3235.08	1.2	0.434786	2.75997	0.00578063	0.0373439
ENSG00000280594	BTG3-AS1	processed_transcript	BTG3 antisense RNA 1	66.1716	-0.097012	0.389547	-0.249038	0.803331	0.974881
ENSG00000123815	COQ8B	protein_coding	coenzyme Q8B	16465.2	0.0824489	0.243381	0.338765	0.734787	0.951512
ENSG00000274956	AC120042.3	lincRNA		2.12341	7.12313	4.59074	1.55163	0.120751	0.391288
ENSG00000158545	ZC3H18	protein_coding	zinc finger CCCH-type containing 18	6538.73	-0.400024	0.224384	-1.78276	0.0746251	0.283449
ENSG00000103199	ZNF500	protein_coding	zinc finger protein 500	3943.57	-0.128642	0.251244	-0.51202	0.608637	0.888574
ENSG00000103197	TSC2	protein_coding	TSC complex subunit 2	24268.9	0.0621442	0.252922	0.245704	0.805911	0.975756
ENSG00000143093	STRIP1	protein_coding	striatin interacting protein 1	4192.4	-0.864003	0.169896	-5.08546	3.66728e-07	2.32936e-05
ENSG00000273327	OR6L2P	unprocessed_pseudogene	olfactory receptor family 6 subfamily L member 2 pseudogene	2.77575	2.94357	3.34081	0.881097	0.378265	0.723464
ENSG00000067365	METTL22	protein_coding	methyltransferase like 22	963.978	-0.0156286	0.250545	-0.0623787	0.950261	0.996331
ENSG00000235059	AC008175.1	lincRNA		0.40066	16.5795	4.64681	3.56792	0.000359822	0.00357839
ENSG00000249504	PCDHA14	transcribed_unprocessed_pseudogene	protocadherin alpha 14 pseudogene	3.29633	15.8677	4.62424	3.43141	0.000600443	0.00533991
ENSG00000215158	AC138409.2	transcribed_unprocessed_pseudogene		7.26526	-1.15133	1.89652	-0.607074	0.543802	0.84706
ENSG00000167962	ZNF598	protein_coding	zinc finger protein 598	8591.31	-0.39174	0.195552	-2.00325	0.0451504	0.196849
ENSG00000279455	AC117500.5	TEC		2.24788	1.8845	4.6259	0.407379	0.68373	0.928345
ENSG00000204390	HSPA1L	protein_coding	heat shock protein family A (Hsp70) member 1 like	7.51853	-2.87518	3.0563	-0.940738	0.346839	0.702887
ENSG00000277218	AL139123.1	sense_intronic		1.36872	7.44362	4.58192	1.62456	0.104256	0.356201
ENSG00000167705	RILP	protein_coding	Rab interacting lysosomal protein	481.3	-0.797323	2.01798	-0.39511	0.692761	0.932431
ENSG00000274159	AL133243.1	sense_intronic		0.963673	-5.25053	4.67466	-1.12319	0.261357	0.618957
ENSG00000207383	RF00019	misc_RNA		1.78519	-1.33584	3.47802	-0.384081	0.700918	0.936615
ENSG00000227394	AC007386.1	processed_pseudogene		0.889929	-20.7875	4.6125	-4.50676	6.58243e-06	0.000245705
ENSG00000227304	AC067942.1	transcribed_processed_pseudogene		2.63839	2.57266	1.98517	1.29594	0.194998	0.525829
ENSG00000232927	USP12PY	processed_pseudogene	ubiquitin specific peptidase 12 pseudogene, Y-linked	0.457241	-13.3317	4.67466	-2.85191	0.0043457	0.0293545
ENSG00000074657	ZNF532	protein_coding	zinc finger protein 532	486.411	0.562703	0.355758	1.5817	0.113718	0.376056
ENSG00000135686	KLHL36	protein_coding	kelch like family member 36	7030.57	-0.636571	0.166638	-3.82009	0.000133404	0.00192709
ENSG00000140937	CDH11	protein_coding	cadherin 11	169.013	0.821195	0.566994	1.44833	0.147524	0.444137
ENSG00000269806	BICRA-AS1	antisense	BICRA antisense RNA 1	1.55675	4.7511	4.54015	1.04646	0.295347	0.657832
ENSG00000137868	STRA6	protein_coding	stimulated by retinoic acid 6	3.82701	0.326675	4.63998	0.0704044	0.943872	0.996331
ENSG00000274213	AC015912.3	lincRNA		25.3783	-0.225705	1.48751	-0.151733	0.879397	0.994386
ENSG00000074370	ATP2A3	protein_coding	ATPase sarcoplasmic/endoplasmic reticulum Ca2+ transporting 3	1050.92	1.66216	0.47214	3.52049	0.000430753	0.00406812
ENSG00000280374	AC019080.5	sense_intronic		13.9081	-5.04249	2.0774	-2.42731	0.0152114	0.0842784
ENSG00000135973	GPR45	protein_coding	G protein-coupled receptor 45	1.60684	-2.65863	4.54742	-0.584646	0.558786	0.857436
ENSG00000111727	HCFC2	protein_coding	host cell factor C2	202.947	0.926909	0.678573	1.36597	0.171949	0.488819
ENSG00000278535	DHRS11	protein_coding	dehydrogenase/reductase 11	1018.89	-0.179272	0.273558	-0.655334	0.512253	0.825499
ENSG00000196757	ZNF700	protein_coding	zinc finger protein 700	50.7899	0.483154	1.10108	0.438801	0.660806	0.915577
ENSG00000171811	CFAP46	protein_coding	cilia and flagella associated protein 46	35.4629	-1.7166	1.4816	-1.15862	0.246613	0.601016
ENSG00000279315	AL158212.4	TEC		3.77338	-4.87743	4.54164	-1.07394	0.282852	0.645656
ENSG00000278291	AL161772.1	antisense		5340.32	0.112603	0.192559	0.58477	0.558702	0.857436
ENSG00000140931	CMTM3	protein_coding	CKLF like MARVEL transmembrane domain containing 3	6488.98	-1.16802	0.282098	-4.14046	3.46605e-05	0.000842126
ENSG00000270776	AC012443.1	processed_pseudogene		0.548245	-18.403	4.64732	-3.95992	7.49761e-05	0.00139755
ENSG00000265690	AC074143.1	protein_coding		206.4	1.17244	0.787904	1.48805	0.136737	0.424274
ENSG00000279827	AC136469.2	TEC		6.22535	-2.88911	4.08692	-0.706917	0.479618	0.802738
ENSG00000234072	AC074117.1	antisense		189.727	0.536356	0.79482	0.674815	0.499793	0.817116
ENSG00000241684	ADAMTS9-AS2	antisense	ADAMTS9 antisense RNA 2	1.15694	4.17932	4.58196	0.912127	0.361702	0.713326
ENSG00000167555	ZNF528	protein_coding	zinc finger protein 528	58.5122	0.0530819	0.741962	0.0715427	0.942966	0.996331
ENSG00000117650	NEK2	protein_coding	NIMA related kinase 2	654.547	-1.62627	0.579043	-2.80856	0.00497642	0.0328813
ENSG00000103226	NOMO3	protein_coding	NODAL modulator 3	6020.91	-0.355966	0.293613	-1.21236	0.225374	0.57234
ENSG00000169564	PCBP1	protein_coding	poly(rC) binding protein 1	71765.6	-0.0638383	0.155375	-0.410867	0.68117	0.926948
ENSG00000164932	CTHRC1	protein_coding	collagen triple helix repeat containing 1	339.819	0.0934193	0.271198	0.344469	0.730493	0.950084
ENSG00000266899	AKR1B1P7	processed_pseudogene	aldo-keto reductase family 1 member B1 pseudogene 7	0.564326	-0.453908	4.592	-0.0988474	0.921259	0.996331
ENSG00000070269	TMEM260	protein_coding	transmembrane protein 260	424.424	-0.361984	0.639616	-0.56594	0.571435	0.866887
ENSG00000233932	CTXN2	protein_coding	cortexin 2	1.4979	-4.83883	4.67466	-1.03512	0.300613	0.662984
ENSG00000131480	AOC2	protein_coding	amine oxidase, copper containing 2	27.737	-1.04352	1.489	-0.700822	0.483414	0.805506
ENSG00000165632	TAF3	protein_coding	TATA-box binding protein associated factor 3	292.655	-0.408099	0.296724	-1.37535	0.169024	0.483337
ENSG00000213253	RPL12P42	processed_pseudogene	ribosomal protein L12 pseudogene 42	4.15579	17.5703	4.5974	3.8218	0.000132483	0.00192022
ENSG00000251493	FOXD1	protein_coding	forkhead box D1	9.43761	-1.10227	1.94908	-0.565531	0.571713	0.867111
ENSG00000230356	NCAPD2P1	processed_pseudogene	non-SMC condensin I complex subunit D2 pseudogene 1	1.26926	1.04743	4.56959	0.229216	0.818701	0.979606
ENSG00000108602	ALDH3A1	protein_coding	aldehyde dehydrogenase 3 family member A1	1.41291	-2.20957	4.6018	-0.480154	0.631118	0.900054
ENSG00000109323	MANBA	protein_coding	mannosidase beta	1591.81	0.100839	0.221766	0.454709	0.649319	0.910289
ENSG00000171159	C9orf16	protein_coding	chromosome 9 open reading frame 16	17873.7	-0.149391	0.218759	-0.682903	0.494668	0.813373
ENSG00000261513	AC009097.4	antisense		23.137	-0.51634	1.40307	-0.368007	0.712868	0.942488
ENSG00000129451	KLK10	protein_coding	kallikrein related peptidase 10	3.17297	3.62247	4.56861	0.792903	0.427835	0.762314
ENSG00000213145	CRIP1	protein_coding	cysteine rich protein 1	283.323	-1.25231	0.299463	-4.18184	2.89161e-05	0.000739846
ENSG00000120992	LYPLA1	protein_coding	lysophospholipase I	2707.6	0.266057	0.279024	0.953525	0.340324	0.698022
ENSG00000196954	CASP4	protein_coding	caspase 4	555.781	0.219048	0.360839	0.607051	0.543817	0.84706
ENSG00000164930	FZD6	protein_coding	frizzled class receptor 6	615.188	0.135694	0.706479	0.19207	0.847687	0.986699
ENSG00000177200	CHD9	protein_coding	chromodomain helicase DNA binding protein 9	215.902	1.10162	0.57425	1.91837	0.0550642	0.228438
ENSG00000205078	SYCE1L	protein_coding	synaptonemal complex central element protein 1 like	185.693	0.709192	0.554455	1.27908	0.200869	0.536075
ENSG00000267394	AC004596.1	antisense		15.8575	0.371005	0.849451	0.436759	0.662286	0.916384
ENSG00000240137	ERICH6-AS1	antisense	ERICH6 antisense RNA 1	17.52	-1.41146	2.10768	-0.669673	0.503066	0.819565
ENSG00000186184	POLR1D	protein_coding	RNA polymerase I subunit D	4644.81	-0.11132	0.196777	-0.565717	0.571586	0.867021
ENSG00000213676	ATF6B	protein_coding	activating transcription factor 6 beta	5043.05	-0.0459264	0.40002	-0.11481	0.908596	0.996331
ENSG00000241057	AC004951.3	transcribed_unprocessed_pseudogene		6.73804	-7.56469	4.57981	-1.65175	0.0985858	0.343613
ENSG00000128482	RNF112	protein_coding	ring finger protein 112	1.44614	-11.52	4.67466	-2.46436	0.0137259	0.077308
ENSG00000263126	AC040162.3	lincRNA		35.6507	-0.205944	0.52813	-0.389949	0.696574	0.93419
ENSG00000132341	RAN	protein_coding	RAN, member RAS oncogene family	17651.7	0.0823251	0.169528	0.485613	0.627242	0.897513
ENSG00000257070	AP003170.5	processed_pseudogene		3.55511	2.10599	3.60497	0.584189	0.559093	0.857584
ENSG00000221988	PPT2	protein_coding	palmitoyl-protein thioesterase 2	3.17072	2.08668	1.80311	1.15726	0.247165	0.601688
ENSG00000112159	MDN1	protein_coding	midasin AAA ATPase 1	298.895	-0.436315	0.67283	-0.648477	0.516676	0.828951
ENSG00000092621	PHGDH	protein_coding	phosphoglycerate dehydrogenase	22120.5	-0.777334	0.198714	-3.91183	9.15993e-05	0.0015704
ENSG00000008300	CELSR3	protein_coding	cadherin EGF LAG seven-pass G-type receptor 3	456.214	0.396424	0.366149	1.08268	0.278949	0.641062
ENSG00000267980	AC007292.1	antisense		57.5334	1.28815	0.649604	1.98298	0.0473696	0.203946
ENSG00000158246	FAM46B	protein_coding	family with sequence similarity 46 member B	788.266	-1.58219	0.208376	-7.59293	3.12759e-14	1.70447e-11
ENSG00000279555	AC091181.1	TEC		6.25463	0.311081	2.04143	0.152384	0.878884	0.994218
ENSG00000285367	AC087564.1	lincRNA		1.55012	-4.44268	4.57504	-0.97107	0.331513	0.689674
ENSG00000261101	AC234775.3	sense_overlapping		6.55142	4.78947	3.20898	1.49252	0.135563	0.422117
ENSG00000123106	CCDC91	protein_coding	coiled-coil domain containing 91	84.0705	0.381273	0.963862	0.395569	0.692423	0.932298
ENSG00000230630	DNM3OS	antisense	DNM3 opposite strand/antisense RNA	2.12141	14.6199	4.64638	3.14651	0.00165231	0.0127078
ENSG00000151572	ANO4	protein_coding	anoctamin 4	327.472	-0.15208	0.687214	-0.2213	0.824859	0.981488
ENSG00000096093	EFHC1	protein_coding	EF-hand domain containing 1	284.412	0.205327	0.422669	0.485786	0.627119	0.897513
ENSG00000126457	PRMT1	protein_coding	protein arginine methyltransferase 1	23328.2	-0.214077	0.174116	-1.22951	0.218882	0.562034
ENSG00000240497	AC092919.1	lincRNA		0.951088	-8.59392	4.67466	-1.8384	0.0660029	0.259676
ENSG00000150787	PTS	protein_coding	6-pyruvoyltetrahydropterin synthase	1017.81	0.405405	0.252378	1.60634	0.108199	0.364442
ENSG00000033050	ABCF2	protein_coding	ATP binding cassette subfamily F member 2	6885.69	0.000257604	0.198798	0.00129581	0.998966	0.99975
ENSG00000273874	MIR6859-2	miRNA	microRNA 6859-2	17.6746	0.560039	0.676799	0.827481	0.407964	0.746834
ENSG00000164294	GPX8	protein_coding	glutathione peroxidase 8 (putative)	814.096	-0.0765094	0.377719	-0.202556	0.839482	0.985344
ENSG00000203499	IQANK1	protein_coding	IQ motif and ankyrin repeat containing 1	64.2671	-1.18632	1.76637	-0.671615	0.501829	0.818933
ENSG00000171766	GATM	protein_coding	glycine amidinotransferase	189.487	0.916319	0.819529	1.11811	0.263522	0.621511
ENSG00000198211	AC092143.1	protein_coding		2323.64	-5.18586	2.81457	-1.8425	0.0654014	0.258054
ENSG00000256262	USP30-AS1	antisense	USP30 antisense RNA 1	13.5012	6.70185	2.47141	2.71175	0.00669294	0.0423736
ENSG00000253833	AC022868.1	processed_pseudogene		7.8964	0.350132	1.20968	0.289443	0.772243	0.966172
ENSG00000226243	RPL37AP1	processed_pseudogene	ribosomal protein L37a pseudogene 1	597.854	-0.140199	0.233047	-0.60159	0.547447	0.849643
ENSG00000260404	AC110079.1	transcribed_unprocessed_pseudogene		401.279	-0.484802	0.373587	-1.2977	0.194392	0.524949
ENSG00000128340	RAC2	protein_coding	Rac family small GTPase 2	74.3446	-1.45334	0.556404	-2.61202	0.00900097	0.0545524
ENSG00000118503	TNFAIP3	protein_coding	TNF alpha induced protein 3	1185.97	0.261711	0.362452	0.722058	0.470259	0.795626
ENSG00000151304	SRFBP1	protein_coding	serum response factor binding protein 1	52.1762	1.85912	1.25941	1.47618	0.139895	0.430589
ENSG00000104524	PYCR3	protein_coding	pyrroline-5-carboxylate reductase 3	3915.86	-0.236897	0.211976	-1.11757	0.263752	0.621712
ENSG00000270554	AC069431.2	processed_pseudogene		0.991868	-18.1081	4.62341	-3.91661	8.98027e-05	0.00154889
ENSG00000170276	HSPB2	protein_coding	heat shock protein family B (small) member 2	5121.46	0.688288	0.280624	2.45271	0.0141786	0.0793659
ENSG00000198892	SHISA4	protein_coding	shisa family member 4	10304.4	0.102463	0.188425	0.543786	0.586589	0.876075
ENSG00000178385	PLEKHM3	protein_coding	pleckstrin homology domain containing M3	756.914	0.839522	0.404944	2.07318	0.0381552	0.173571
ENSG00000140836	ZFHX3	protein_coding	zinc finger homeobox 3	637.901	-0.302864	0.245665	-1.23283	0.217638	0.560106
ENSG00000135148	TRAFD1	protein_coding	TRAF-type zinc finger domain containing 1	3343.63	-0.0767717	0.162912	-0.471246	0.637465	0.902727
ENSG00000168078	PBK	protein_coding	PDZ binding kinase	1510.03	-0.968523	0.605483	-1.59959	0.10969	0.367599
ENSG00000165617	DACT1	protein_coding	dishevelled binding antagonist of beta catenin 1	1235	-0.209572	0.37732	-0.555422	0.578606	0.87119
ENSG00000117298	ECE1	protein_coding	endothelin converting enzyme 1	7409.43	-0.444076	0.170994	-2.59703	0.00940328	0.0564756
ENSG00000127989	MTERF1	protein_coding	mitochondrial transcription termination factor 1	142.446	-0.241315	0.391961	-0.615662	0.538118	0.843196
ENSG00000258456	PTCD2P1	processed_pseudogene	pentatricopeptide repeat domain 2 pseudogene 1	0.534575	-18.2888	4.64691	-3.9357	8.29542e-05	0.00147547
ENSG00000162972	MAIP1	protein_coding	matrix AAA peptidase interacting protein 1	469.568	0.198744	0.235329	0.844535	0.398371	0.739455
ENSG00000254535	PABPC4L	protein_coding	poly(A) binding protein cytoplasmic 4 like	0.937909	-18.358	4.64702	-3.95049	7.79929e-05	0.00142386
ENSG00000169189	NSMCE1	protein_coding	NSE1 homolog, SMC5-SMC6 complex component	2289.91	-0.314241	0.268422	-1.1707	0.241721	0.595001
ENSG00000246662	LINC00535	antisense	long intergenic non-protein coding RNA 535	2.7907	1.88086	4.62196	0.40694	0.684052	0.928362
ENSG00000249853	HS3ST5	protein_coding	heparan sulfate-glucosamine 3-sulfotransferase 5	2.13908	6.30678	4.54788	1.38675	0.165518	0.476463
ENSG00000123643	SLC36A1	protein_coding	solute carrier family 36 member 1	6814.89	0.0734641	0.266863	0.275288	0.783095	0.969714
ENSG00000238271	IFNWP19	unprocessed_pseudogene	interferon omega 1 pseudogene 19	7.10994	1.87867	3.66416	0.512714	0.608151	0.888423
ENSG00000110107	PRPF19	protein_coding	pre-mRNA processing factor 19	16561.4	-0.25934	0.173194	-1.49739	0.134291	0.419354
ENSG00000280239	AC011498.7	TEC		108.741	0.500112	0.601726	0.83113	0.4059	0.744999
ENSG00000130508	PXDN	protein_coding	peroxidasin	14375.9	-0.341662	0.204701	-1.66908	0.0951017	0.335546
ENSG00000167377	ZNF23	protein_coding	zinc finger protein 23	39.2276	2.8083	1.25006	2.24653	0.0246703	0.124076
ENSG00000131781	FMO5	protein_coding	flavin containing monooxygenase 5	61.0368	0.493385	0.842946	0.58531	0.558339	0.857436
ENSG00000124549	BTN2A3P	transcribed_unprocessed_pseudogene	butyrophilin subfamily 2 member A3, pseudogene	106.242	-0.217837	0.409954	-0.531368	0.595164	0.880114
ENSG00000140832	MARVELD3	protein_coding	MARVEL domain containing 3	66.9527	6.95802	1.60215	4.34294	1.40591e-05	0.000441864
ENSG00000230098	TCERG1L-AS1	antisense	TCERG1L antisense RNA 1	0.357704	-4.85418	4.67466	-1.0384	0.299083	0.661237
ENSG00000186132	C2orf76	protein_coding	chromosome 2 open reading frame 76	126.226	0.00249515	0.880904	0.00283248	0.99774	0.99975
ENSG00000176678	FOXL1	protein_coding	forkhead box L1	5.02412	1.07952	3.56918	0.302457	0.762304	0.962566
ENSG00000230185	C9orf147	antisense	chromosome 9 open reading frame 147	4.36246	6.14615	4.55376	1.34969	0.177116	0.49679
ENSG00000025423	HSD17B6	protein_coding	hydroxysteroid 17-beta dehydrogenase 6	56.6255	-3.17872	1.34795	-2.35818	0.0183645	0.09814
ENSG00000143369	ECM1	protein_coding	extracellular matrix protein 1	128785	-0.394614	0.21289	-1.8536	0.0637962	0.253409
ENSG00000167553	TUBA1C	protein_coding	tubulin alpha 1c	71707.6	-0.497314	0.232385	-2.14004	0.0323512	0.153257
ENSG00000165583	SSX5	protein_coding	SSX family member 5	36.7409	0.638041	1.21632	0.524569	0.599883	0.883293
ENSG00000124596	OARD1	protein_coding	O-acyl-ADP-ribose deacylase 1	436.143	0.563987	0.19654	2.86958	0.00411019	0.0279437
ENSG00000136021	SCYL2	protein_coding	SCY1 like pseudokinase 2	794.73	0.40507	0.437567	0.925734	0.354584	0.707172
ENSG00000213108	BTF3L4P3	processed_pseudogene	basic transcription factor 3 like 4 pseudogene 3	2.94365	0.616387	2.74166	0.224823	0.822117	0.980377
ENSG00000107929	LARP4B	protein_coding	La ribonucleoprotein domain family member 4B	2178.6	-0.146337	0.3079	-0.475275	0.634591	0.901375
ENSG00000155974	GRIP1	protein_coding	glutamate receptor interacting protein 1	40.2405	-1.63206	1.39046	-1.17376	0.240493	0.593585
ENSG00000144649	FAM198A	protein_coding	family with sequence similarity 198 member A	24.6976	-1.10364	1.55494	-0.70976	0.477853	0.801589
ENSG00000242950	ERVW-1	protein_coding	endogenous retrovirus group W member 1, envelope	2.56739	-7.53208	4.56618	-1.64954	0.0990377	0.344379
ENSG00000169682	SPNS1	protein_coding	sphingolipid transporter 1 (putative)	32334.3	0.325176	0.190992	1.70256	0.0886505	0.320321
ENSG00000234917	AC098484.2	lincRNA		5.06015	4.01335	3.67296	1.09267	0.274537	0.634862
ENSG00000108604	SMARCD2	protein_coding	SWI/SNF related, matrix associated, actin dependent regulator of chromatin, subfamily d, member 2	20843.1	-0.62807	0.221823	-2.8314	0.00463442	0.0309063
ENSG00000169402	RSPH10B2	protein_coding	radial spoke head 10 homolog B2	0.430976	-18.3969	4.64638	-3.9594	7.51373e-05	0.00139755
ENSG00000188092	GPR89B	protein_coding	G protein-coupled receptor 89B	443.814	0.192978	0.392334	0.491873	0.622809	0.895971
ENSG00000198026	ZNF335	protein_coding	zinc finger protein 335	6506.99	-0.315039	0.258366	-1.21935	0.22271	0.568596
ENSG00000178093	TSSK6	protein_coding	testis specific serine kinase 6	287.201	1.49113	0.543251	2.74483	0.00605422	0.0388001
ENSG00000124785	NRN1	protein_coding	neuritin 1	6.41385	-2.25266	3.24685	-0.693799	0.487808	0.807944
ENSG00000141469	SLC14A1	protein_coding	solute carrier family 14 member 1 (Kidd blood group)	6.59818	2.50942	4.10092	0.611916	0.540593	0.845034
ENSG00000187134	AKR1C1	protein_coding	aldo-keto reductase family 1 member C1	248.572	4.03157	0.985616	4.09041	4.30614e-05	0.000966731
ENSG00000099953	MMP11	protein_coding	matrix metallopeptidase 11	343.121	0.124535	0.875828	0.142191	0.886929	0.995583
ENSG00000264940	SNORD3C	snoRNA	small nucleolar RNA, C/D box 3C	6.81968	0.536257	0.972075	0.551662	0.58118	0.873308
ENSG00000225174	OSTM1-AS1	lincRNA	OSTM1 antisense RNA 1	0.238469	-4.72762	4.67466	-1.01133	0.311859	0.672457
ENSG00000213225	NOC2LP1	transcribed_processed_pseudogene	NOC2 like nucleolar associated transcriptional repressor pseudogene 1	327.324	-0.589079	0.431019	-1.36671	0.171715	0.488439
ENSG00000272823	AL445423.1	lincRNA		1.97112	-2.48521	4.60099	-0.540146	0.589096	0.877207
ENSG00000185634	SHC4	protein_coding	SHC adaptor protein 4	1247.75	-0.396297	0.238591	-1.66099	0.0967149	0.33983
ENSG00000284952	AC104472.3	protein_coding		23.8727	0.165255	4.5044	0.0366875	0.970734	0.996331
ENSG00000163531	NFASC	protein_coding	neurofascin	344.899	2.57786	0.791815	3.25564	0.00113138	0.00919174
ENSG00000169188	APEX2	protein_coding	apurinic/apyrimidinic endodeoxyribonuclease 2	7559.72	-0.272761	0.191894	-1.42141	0.155197	0.45768
ENSG00000180113	TDRD6	protein_coding	tudor domain containing 6	1.45308	11.0017	4.64686	2.36755	0.0179064	0.0961639
ENSG00000238165	AC007560.1	processed_pseudogene		12.6191	-0.608244	0.797144	-0.763029	0.445446	0.775291
ENSG00000274051	RF02271	misc_RNA		4.91244	-0.181634	1.43126	-0.126905	0.899016	0.996331
ENSG00000119777	TMEM214	protein_coding	transmembrane protein 214	22643.8	-0.499014	0.318967	-1.56447	0.117708	0.384999
ENSG00000213684	LDHBP2	processed_pseudogene	lactate dehydrogenase B pseudogene 2	47.1068	0.357883	1.10918	0.322657	0.746955	0.956178
ENSG00000245105	A2M-AS1	antisense	A2M antisense RNA 1 (head to head)	28.2329	1.73199	1.12813	1.53527	0.124718	0.400146
ENSG00000201900	RNY1P13	misc_RNA	RNA, Ro-associated Y1 pseudogene 13	0.435137	-4.63986	4.67466	-0.992554	0.320927	0.680981
ENSG00000235173	HGH1	protein_coding	HGH1 homolog	4498.75	-0.544755	0.189772	-2.87058	0.00409723	0.0278834
ENSG00000233087	RAB6D	protein_coding	RAB6D, member RAS oncogene family	44.4295	-0.215435	0.718499	-0.29984	0.764299	0.96351
ENSG00000177485	ZBTB33	protein_coding	zinc finger and BTB domain containing 33	669.159	0.374884	0.511915	0.732316	0.463976	0.790488
ENSG00000130714	POMT1	protein_coding	protein O-mannosyltransferase 1	8853.92	-0.217815	0.190582	-1.14289	0.253084	0.609643
ENSG00000266680	AL135905.1	antisense		54.8162	-0.0814235	0.57527	-0.14154	0.887444	0.995583
ENSG00000198909	MAP3K3	protein_coding	mitogen-activated protein kinase kinase kinase 3	9529.6	-0.813557	0.263896	-3.08287	0.00205013	0.0153289
ENSG00000232732	AC097717.1	processed_transcript		0.998104	-2.08532	4.63197	-0.450201	0.652566	0.911923
ENSG00000055813	CCDC85A	protein_coding	coiled-coil domain containing 85A	62.5777	1.86301	0.877544	2.12298	0.0337552	0.158029
ENSG00000272263	AC034198.2	antisense		7.73078	-1.28187	2.48379	-0.516097	0.605787	0.886561
ENSG00000213239	NPM1P32	processed_pseudogene	nucleophosmin 1 pseudogene 32	1.74812	-0.299671	2.69752	-0.111091	0.911544	0.996331
ENSG00000105197	TIMM50	protein_coding	translocase of inner mitochondrial membrane 50	25477.6	-0.379061	0.202902	-1.8682	0.0617339	0.24749
ENSG00000275765	AC091982.3	lincRNA		148.287	-0.097683	0.521255	-0.1874	0.851347	0.988069
ENSG00000226413	OR8T1P	unprocessed_pseudogene	olfactory receptor family 8 subfamily T member 1 pseudogene	2.27587	18.7183	4.58614	4.08149	4.47484e-05	0.000986528
ENSG00000168743	NPNT	protein_coding	nephronectin	135.132	7.16069	2.42684	2.95063	0.00317131	0.0223583
ENSG00000270228	AC079880.1	processed_pseudogene		5.83156	0.56117	1.3311	0.421583	0.673329	0.922223
ENSG00000157600	TMEM164	protein_coding	transmembrane protein 164	6273.71	-1.10215	0.347398	-3.1726	0.00151079	0.0117555
ENSG00000164938	TP53INP1	protein_coding	tumor protein p53 inducible nuclear protein 1	1233.11	-0.118607	0.381902	-0.310569	0.756128	0.960547
ENSG00000101144	BMP7	protein_coding	bone morphogenetic protein 7	5.62909	8.53401	4.11502	2.07387	0.0380917	0.173311
ENSG00000214366	EIF4EP5	processed_pseudogene	eukaryotic translation initiation factor 4E pseudogene 5	0.794183	0.107372	4.66035	0.0230394	0.981619	0.996331
ENSG00000274447	AC005790.1	antisense		26.3953	-0.206294	0.967321	-0.213264	0.831121	0.98345
ENSG00000145423	SFRP2	protein_coding	secreted frizzled related protein 2	63.7196	10.0904	1.77845	5.67368	1.39759e-08	1.57368e-06
ENSG00000235984	GPC5-AS1	antisense	GPC5 antisense RNA 1	0.423087	1.91726	4.64044	0.413163	0.679487	0.926246
ENSG00000278700	RF00017	misc_RNA		2.63924	0.39281	3.79802	0.103425	0.917626	0.996331
ENSG00000266160	RN7SL612P	misc_RNA	RNA, 7SL, cytoplasmic 612, pseudogene	0.784936	-4.29723	4.67466	-0.91926	0.35796	0.709742
ENSG00000255121	AP003392.4	lincRNA		378.738	-0.268632	0.415248	-0.646919	0.517684	0.829639
ENSG00000198590	C3orf35	processed_transcript	chromosome 3 open reading frame 35	0.72584	17.0568	4.64628	3.67107	0.000241533	0.00276303
ENSG00000072818	ACAP1	protein_coding	ArfGAP with coiled-coil, ankyrin repeat and PH domains 1	313.772	0.726959	0.327353	2.22072	0.0263699	0.130884
ENSG00000271303	SRXN1	protein_coding	sulfiredoxin 1	4819.33	0.237654	0.15992	1.48608	0.137259	0.425406
ENSG00000163218	PGLYRP4	protein_coding	peptidoglycan recognition protein 4	1.11294	17.5584	4.6457	3.7795	0.000157141	0.00209924
ENSG00000173933	RBM4	protein_coding	RNA binding motif protein 4	9320.86	0.332897	0.240403	1.38474	0.166131	0.477605
ENSG00000238058	AL355574.1	antisense		3.30992	-4.32506	3.69712	-1.16985	0.242063	0.595483
ENSG00000175984	DENND2C	protein_coding	DENN domain containing 2C	32.3054	-2.01492	1.58439	-1.27173	0.20347	0.53965
ENSG00000099331	MYO9B	protein_coding	myosin IXB	54345.5	-0.68325	0.248322	-2.75147	0.00593276	0.0381278
ENSG00000099625	CBARP	protein_coding	CACN beta subunit associated regulatory protein	2464.74	-0.0941366	0.227852	-0.413147	0.679499	0.926246
ENSG00000154263	ABCA10	protein_coding	ATP binding cassette subfamily A member 10	3.14931	3.484	3.56666	0.976825	0.328656	0.686711
ENSG00000196867	ZFP28	protein_coding	ZFP28 zinc finger protein	83.4081	0.0238421	0.59899	0.0398039	0.968249	0.996331
ENSG00000110811	P3H3	protein_coding	prolyl 3-hydroxylase 3	20441.2	-0.166099	0.189574	-0.876169	0.380938	0.724793
ENSG00000157999	ANKRD61	protein_coding	ankyrin repeat domain 61	12.8088	-0.48068	1.94603	-0.247005	0.804904	0.975399
ENSG00000185499	MUC1	protein_coding	mucin 1, cell surface associated	434.835	1.90554	0.572658	3.32754	0.000876178	0.00736655
ENSG00000215032	GNL3LP1	processed_pseudogene	G protein nucleolar 3 like pseudogene 1	10.7312	0.720186	1.60923	0.447534	0.65449	0.912748
ENSG00000144152	FBLN7	protein_coding	fibulin 7	608.795	0.606441	0.247191	2.45333	0.0141539	0.0792601
ENSG00000279620	AC099494.3	TEC		0.534213	17.0048	4.64638	3.6598	0.000252413	0.00283629
ENSG00000095203	EPB41L4B	protein_coding	erythrocyte membrane protein band 4.1 like 4B	79.863	5.87244	1.26206	4.65307	3.27033e-06	0.000140115
ENSG00000244159	RPS27AP13	processed_pseudogene	ribosomal protein S27a pseudogene 13	2.89333	-0.574066	3.16373	-0.181452	0.856012	0.989242
ENSG00000130234	ACE2	protein_coding	angiotensin I converting enzyme 2	9.23323	7.28476	4.516	1.6131	0.106723	0.361522
ENSG00000163956	LRPAP1	protein_coding	LDL receptor related protein associated protein 1	19678.2	-0.112977	0.175231	-0.644731	0.519102	0.830008
ENSG00000142252	GEMIN7	protein_coding	gem nuclear organelle associated protein 7	2702.35	-0.0128658	0.193038	-0.0666489	0.946861	0.996331
ENSG00000226970	AL450063.1	processed_pseudogene		7.93171	0.923367	1.27716	0.722985	0.469689	0.795485
ENSG00000189120	SP6	protein_coding	Sp6 transcription factor	8.97699	2.73678	3.04039	0.900141	0.368045	0.717269
ENSG00000224800	RPS27AP6	processed_pseudogene	ribosomal protein S27a pseudogene 6	1.00975	-19.6218	4.64609	-4.22329	2.40759e-05	0.000650193
ENSG00000213402	PTPRCAP	protein_coding	protein tyrosine phosphatase, receptor type C associated protein	82.0565	7.85438	3.22572	2.43493	0.0148949	0.0827799
ENSG00000111879	FAM184A	protein_coding	family with sequence similarity 184 member A	1.33436	1.61307	4.62104	0.34907	0.727037	0.94828
ENSG00000139618	BRCA2	protein_coding	BRCA2, DNA repair associated	11.0297	-0.883674	1.25039	-0.70672	0.47974	0.802738
ENSG00000224287	MSL3P1	transcribed_processed_pseudogene	MSL complex subunit 3 pseudogene 1	49.0369	-0.40455	1.55906	-0.259483	0.795263	0.973348
ENSG00000114812	VIPR1	protein_coding	vasoactive intestinal peptide receptor 1	5.18984	21.0628	4.61725	4.56176	5.07271e-06	0.000199461
ENSG00000279878	AP003108.5	TEC		1.25185	18.0126	4.64582	3.87716	0.000105682	0.00168602
ENSG00000165389	SPTSSA	protein_coding	serine palmitoyltransferase small subunit A	3290.04	-0.0649713	0.220623	-0.29449	0.768384	0.965025
ENSG00000101265	RASSF2	protein_coding	Ras association domain family member 2	194.096	-1.17831	0.570795	-2.06433	0.0389864	0.17623
ENSG00000134698	AGO4	protein_coding	argonaute 4, RISC catalytic component	730.139	0.484127	0.406247	1.19171	0.233376	0.583151
ENSG00000166788	SAAL1	protein_coding	serum amyloid A like 1	618.458	0.295633	0.359897	0.821438	0.411397	0.749956
ENSG00000145391	SETD7	protein_coding	SET domain containing lysine methyltransferase 7	2063.66	0.726094	0.39976	1.81633	0.0693205	0.268732
ENSG00000213999	MEF2B	protein_coding	myocyte enhancer factor 2B	93.5705	0.560257	1.41123	0.396998	0.691369	0.931891
ENSG00000174871	CNIH2	protein_coding	cornichon family AMPA receptor auxiliary protein 2	965.367	-1.40943	0.346298	-4.06998	4.70162e-05	0.00101151
ENSG00000187474	FPR3	protein_coding	formyl peptide receptor 3	5.46408	20.3012	3.95329	5.13525	2.81767e-07	1.87351e-05
ENSG00000230373	GOLGA6L5P	transcribed_unprocessed_pseudogene	golgin A6 family-like 5, pseudogene	3.65692	-0.682441	3.33834	-0.204425	0.838021	0.985168
ENSG00000264578	AC009630.3	antisense		0.251403	-17.9884	4.64732	-3.87072	0.000108516	0.00170332
ENSG00000163950	SLBP	protein_coding	stem-loop binding protein	1929.07	-0.146275	0.186372	-0.784854	0.432539	0.766607
ENSG00000272150	NBPF25P	transcribed_unprocessed_pseudogene	NBPF member 25, pseudogene	77.4649	0.74931	1.15507	0.648715	0.516522	0.828856
ENSG00000139354	GAS2L3	protein_coding	growth arrest specific 2 like 3	854.887	-0.827433	0.562427	-1.47118	0.141242	0.432534
ENSG00000273133	AC116651.1	antisense		2.26378	-3.27696	4.63375	-0.707195	0.479445	0.802615
ENSG00000259917	HNRNPLP2	unprocessed_pseudogene	heterogeneous nuclear ribonucleoprotein L pseudogene 2	1160.66	-0.246202	0.214504	-1.14777	0.251062	0.606811
ENSG00000159023	EPB41	protein_coding	erythrocyte membrane protein band 4.1	270.59	0.404987	0.447871	0.904249	0.365863	0.71601
ENSG00000106399	RPA3	protein_coding	replication protein A3	904.546	-0.218074	0.215141	-1.01364	0.310756	0.672048
ENSG00000106692	FKTN	protein_coding	fukutin	194.6	0.574145	0.799261	0.718344	0.472545	0.797546
ENSG00000102239	BRS3	protein_coding	bombesin receptor subtype 3	2.93713	-4.41063	4.67466	-0.943518	0.345416	0.702354
ENSG00000155729	KCTD18	protein_coding	potassium channel tetramerization domain containing 18	654.626	0.302706	0.44603	0.678667	0.497349	0.815161
ENSG00000102878	HSF4	protein_coding	heat shock transcription factor 4	3230.14	0.242707	0.247156	0.982002	0.326099	0.684981
ENSG00000103449	SALL1	protein_coding	spalt like transcription factor 1	5.79765	-16.1367	4.67466	-3.45195	0.00055655	0.00501502
ENSG00000167434	CA4	protein_coding	carbonic anhydrase 4	2.7917	0.964898	4.61927	0.208885	0.834538	0.983918
ENSG00000240494	RPS12P28	processed_pseudogene	ribosomal protein S12 pseudogene 28	4.46081	16.9508	4.64627	3.64827	0.000264017	0.00289324
ENSG00000276445	AC005393.1	lincRNA		2.52604	2.42592	3.19187	0.760032	0.447235	0.776326
ENSG00000267493	CIRBP-AS1	antisense	CIRBP antisense RNA 1	199.019	0.336658	0.372336	0.904178	0.365901	0.71601
ENSG00000173950	XXYLT1	protein_coding	xyloside xylosyltransferase 1	3107.99	-0.46589	0.209882	-2.21977	0.0264343	0.131149
ENSG00000224043	CCNT2-AS1	antisense	CCNT2 antisense RNA 1	27.488	0.703515	1.09987	0.639636	0.522409	0.833
ENSG00000150893	FREM2	protein_coding	FRAS1 related extracellular matrix protein 2	28.1651	1.87655	1.53679	1.22109	0.222052	0.567555
ENSG00000207067	SNORA72	snoRNA	small nucleolar RNA, H/ACA box 72	1.26165	-18.2319	4.62302	-3.94373	8.02244e-05	0.00145833
ENSG00000172432	GTPBP2	protein_coding	GTP binding protein 2	9687.58	-0.76542	0.152864	-5.00718	5.52324e-07	3.29328e-05
ENSG00000160183	TMPRSS3	protein_coding	transmembrane serine protease 3	12.2355	0.975775	2.85054	0.342312	0.732116	0.951195
ENSG00000090372	STRN4	protein_coding	striatin 4	22969.9	0.0276143	0.201352	0.137145	0.890916	0.995919
ENSG00000129911	KLF16	protein_coding	Kruppel like factor 16	20278.8	-0.161939	0.216172	-0.749122	0.453784	0.781992
ENSG00000157399	ARSE	protein_coding	arylsulfatase E (chondrodysplasia punctata 1)	1838.71	0.0805877	0.198943	0.40508	0.685419	0.928892
ENSG00000140391	TSPAN3	protein_coding	tetraspanin 3	7582.18	0.177002	0.27388	0.646274	0.518102	0.829813
ENSG00000101544	ADNP2	protein_coding	ADNP homeobox 2	1182.12	-0.548273	0.626506	-0.875127	0.381505	0.725208
ENSG00000234807	LINC01135	lincRNA	long intergenic non-protein coding RNA 1135	1.37805	5.14258	4.57185	1.12484	0.260659	0.61838
ENSG00000065923	SLC9A7	protein_coding	solute carrier family 9 member A7	85.678	4.41504	1.12454	3.92607	8.6345e-05	0.00151359
ENSG00000091592	NLRP1	protein_coding	NLR family pyrin domain containing 1	1503.88	1.61604	0.345066	4.68329	2.82308e-06	0.000125366
ENSG00000236507	BX470209.2	lincRNA		0.535237	-3.63139	4.67466	-0.776824	0.437263	0.769452
ENSG00000261732	AL031708.1	protein_coding		73.634	0.162449	1.16248	0.139744	0.888863	0.995583
ENSG00000182983	ZNF662	protein_coding	zinc finger protein 662	14.6992	0.840736	1.44144	0.583261	0.559718	0.85793
ENSG00000138617	PARP16	protein_coding	poly(ADP-ribose) polymerase family member 16	539.688	-0.704248	0.332178	-2.12009	0.0339985	0.158901
ENSG00000171658	NMRAL2P	transcribed_unprocessed_pseudogene	NmrA like redox sensor 2, pseudogene	28.7244	-0.508968	1.22222	-0.416431	0.677095	0.924741
ENSG00000150773	PIH1D2	protein_coding	PIH1 domain containing 2	6.98597	-2.97009	3.32035	-0.894513	0.371048	0.71911
ENSG00000033030	ZCCHC8	protein_coding	zinc finger CCHC-type containing 8	319.033	0.0876115	0.311651	0.28112	0.778618	0.968205
ENSG00000154864	PIEZO2	protein_coding	piezo type mechanosensitive ion channel component 2	2.97121	4.77049	4.56751	1.04444	0.296282	0.658839
ENSG00000170275	CRTAP	protein_coding	cartilage associated protein	45428.3	-0.217167	0.220755	-0.983747	0.32524	0.684307
ENSG00000089163	SIRT4	protein_coding	sirtuin 4	167.262	1.29139	0.510675	2.52879	0.0114457	0.066532
ENSG00000256159	AC022080.3	processed_pseudogene		0.251403	-17.9884	4.64732	-3.87072	0.000108516	0.00170332
ENSG00000197180	AC244090.1	lincRNA		512.015	0.0554562	0.304403	0.18218	0.855441	0.989087
ENSG00000223804	AC244669.1	transcribed_unprocessed_pseudogene		98.7956	1.5401	0.42912	3.58897	0.000331987	0.00339577
ENSG00000162733	DDR2	protein_coding	discoidin domain receptor tyrosine kinase 2	1469.25	-0.314684	0.217876	-1.44432	0.148648	0.446238
ENSG00000243491	AC082651.3	lincRNA		1.29008	18.0542	4.62335	3.905	9.42261e-05	0.00160674
ENSG00000106868	SUSD1	protein_coding	sushi domain containing 1	525.82	0.489432	0.305007	1.60466	0.108569	0.365133
ENSG00000280106	AC008555.8	TEC		21.2639	4.67152	1.82171	2.56437	0.0103364	0.0612165
ENSG00000186710	CFAP73	protein_coding	cilia and flagella associated protein 73	33.7698	-3.07783	1.64601	-1.86987	0.0615016	0.246849
ENSG00000033170	FUT8	protein_coding	fucosyltransferase 8	465.071	0.385045	0.327018	1.17745	0.239018	0.591157
ENSG00000161328	LRRC56	protein_coding	leucine rich repeat containing 56	183.273	-0.509574	0.835027	-0.610248	0.541697	0.845592
ENSG00000005022	SLC25A5	protein_coding	solute carrier family 25 member 5	42793.7	-1.0635	0.16355	-6.5026	7.89444e-11	1.87057e-08
ENSG00000255516	AP005436.3	lincRNA		0.40066	16.5795	4.64681	3.56792	0.000359822	0.00357839
ENSG00000266235	MIR3176	miRNA	microRNA 3176	5.7056	-2.84352	1.64285	-1.73084	0.0834795	0.30723
ENSG00000277771	RF00017	misc_RNA		0.714925	-20.9426	4.60035	-4.5524	5.30372e-06	0.000206164
ENSG00000156427	FGF18	protein_coding	fibroblast growth factor 18	0.534213	17.0048	4.64638	3.6598	0.000252413	0.00283629
ENSG00000227375	DLG1-AS1	antisense	DLG1 antisense RNA 1	1.48608	-18.6031	4.61982	-4.02681	5.65394e-05	0.00115925
ENSG00000124786	SLC35B3	protein_coding	solute carrier family 35 member B3	711.637	-0.506217	0.307155	-1.64808	0.0993355	0.345122
ENSG00000226797	AC005828.1	antisense		0.653369	-18.5399	4.64659	-3.99	6.60743e-05	0.00127421
ENSG00000151651	ADAM8	protein_coding	ADAM metallopeptidase domain 8	22.0123	2.97443	1.72688	1.72243	0.0849914	0.310947
ENSG00000164061	BSN	protein_coding	bassoon presynaptic cytomatrix protein	132.351	1.16527	0.656692	1.77445	0.0759887	0.286868
ENSG00000162981	FAM84A	protein_coding	family with sequence similarity 84 member A	116.548	8.67271	1.45489	5.96105	2.50618e-09	3.53839e-07
ENSG00000258938	AL162311.3	antisense		40.5042	-0.696824	1.24307	-0.560567	0.575093	0.868597
ENSG00000198888	MT-ND1	protein_coding	mitochondrially encoded NADH:ubiquinone oxidoreductase core subunit 1	661469	0.108959	0.222538	0.48962	0.624403	0.896766
ENSG00000223839	FAM95B1	lincRNA	family with sequence similarity 95 member B1	3.02137	1.54939	2.32515	0.666363	0.505179	0.821485
ENSG00000231758	AC092652.1	antisense		2.56437	0.508744	4.62006	0.110116	0.912317	0.996331
ENSG00000105270	CLIP3	protein_coding	CAP-Gly domain containing linker protein 3	13841.5	0.785259	0.317737	2.47141	0.013458	0.0760835
ENSG00000179131	AC073335.1	processed_pseudogene		10.1328	1.45177	1.18306	1.22713	0.219774	0.563688
ENSG00000074800	ENO1	protein_coding	enolase 1	300747	0.250064	0.221653	1.12818	0.259244	0.616901
ENSG00000122483	CCDC18	protein_coding	coiled-coil domain containing 18	7.12239	-1.30701	2.66727	-0.490019	0.624121	0.89672
ENSG00000145214	DGKQ	protein_coding	diacylglycerol kinase theta	21989.3	-0.318844	0.207009	-1.54024	0.123501	0.397699
ENSG00000144320	LNPK	protein_coding	lunapark, ER junction formation factor	816.643	0.0131021	0.527045	0.0248595	0.980167	0.996331
ENSG00000134240	HMGCS2	protein_coding	3-hydroxy-3-methylglutaryl-CoA synthase 2	0.441527	-4.15612	4.67466	-0.889074	0.373963	0.720738
ENSG00000259780	AC009065.1	lincRNA		12.2902	-2.89618	1.55538	-1.86203	0.0625982	0.250108
ENSG00000152256	PDK1	protein_coding	pyruvate dehydrogenase kinase 1	175.121	-0.225814	0.58512	-0.385928	0.69955	0.935652
ENSG00000197261	C6orf141	protein_coding	chromosome 6 open reading frame 141	1.77445	19.9045	4.59268	4.33397	1.46447e-05	0.000456583
ENSG00000088280	ASAP3	protein_coding	ArfGAP with SH3 domain, ankyrin repeat and PH domain 3	2749.93	-0.494528	0.260692	-1.89698	0.0578305	0.236895
ENSG00000143515	ATP8B2	protein_coding	ATPase phospholipid transporting 8B2	15335.9	-0.521459	0.202607	-2.57374	0.0100606	0.0598298
ENSG00000215016	RPL24P7	processed_pseudogene	ribosomal protein L24 pseudogene 7	3.60352	2.4344	1.84835	1.31707	0.187816	0.514103
ENSG00000049239	H6PD	protein_coding	hexose-6-phosphate dehydrogenase/glucose 1-dehydrogenase	12407	-0.529178	0.248597	-2.12866	0.0332828	0.15642
ENSG00000226380	AC016831.1	lincRNA		69.7377	0.986679	0.924039	1.06779	0.285616	0.648719
ENSG00000106733	NMRK1	protein_coding	nicotinamide riboside kinase 1	345.732	0.392857	0.392928	0.999818	0.317398	0.678816
ENSG00000232027	AL671986.1	processed_pseudogene		4.08448	0.951969	3.25758	0.292232	0.77011	0.965406
ENSG00000238278	ALG1L6P	unprocessed_pseudogene	asparagine-linked glycosylation 1-like 6, pseudogene	55.7031	0.100146	0.468563	0.213729	0.830758	0.98345
ENSG00000279412	AC020763.3	TEC		115.968	0.0202639	0.669863	0.0302509	0.975867	0.996331
ENSG00000230756	RHOQP3	processed_pseudogene	ras homolog family member Q pseudogene 3	36.8357	0.665343	0.766422	0.868116	0.385331	0.728501
ENSG00000130037	KCNA5	protein_coding	potassium voltage-gated channel subfamily A member 5	119.043	0.723394	0.804087	0.899646	0.368309	0.717356
ENSG00000233057	EEF1A1P14	processed_pseudogene	eukaryotic translation elongation factor 1 alpha 1 pseudogene 14	5.96189	0.601364	1.12859	0.532845	0.594141	0.879655
ENSG00000152254	G6PC2	protein_coding	glucose-6-phosphatase catalytic subunit 2	15.7664	29.9078	4.56303	6.55439	5.58713e-11	1.39712e-08
ENSG00000126733	DACH2	protein_coding	dachshund family transcription factor 2	8.20321	5.67953	2.60623	2.17921	0.0293157	0.141938
ENSG00000260300	AC009119.2	protein_coding		25.9828	-1.41019	1.26422	-1.11546	0.264652	0.622974
ENSG00000269399	AC008764.6	lincRNA		41.2419	-0.215893	0.665924	-0.324201	0.745786	0.956011
ENSG00000230724	LINC01001	lincRNA	long intergenic non-protein coding RNA 1001	15.6052	-2.62704	3.2473	-0.808991	0.41852	0.755357
ENSG00000272567	AC109347.2	lincRNA		0.688383	0.106189	4.64821	0.022845	0.981774	0.996331
ENSG00000267361	SEC24AP1	processed_pseudogene	SEC24 homolog A pseudogene 1	0.475766	-3.95814	4.67466	-0.846722	0.39715	0.73882
ENSG00000075643	MOCOS	protein_coding	molybdenum cofactor sulfurase	424.687	-0.465251	0.442957	-1.05033	0.293567	0.656011
ENSG00000236152	MRPS36P1	processed_pseudogene	mitochondrial ribosomal protein S36 pseudogene 1	5.04003	4.31103	2.56953	1.67775	0.0933962	0.331676
ENSG00000131165	CHMP1A	protein_coding	charged multivesicular body protein 1A	20014.9	-0.0821733	0.277148	-0.296496	0.766851	0.964362
ENSG00000227848	SUCLA2-AS1	antisense	SUCLA2 antisense RNA 1	19.7313	0.0196241	0.914985	0.0214474	0.982889	0.996604
ENSG00000179546	HTR1D	protein_coding	5-hydroxytryptamine receptor 1D	2.22101	5.41309	4.57049	1.18436	0.236272	0.586844
ENSG00000225588	AC096669.1	lincRNA		7.72499	-2.26023	3.50525	-0.644815	0.519047	0.830008
ENSG00000062524	LTK	protein_coding	leukocyte receptor tyrosine kinase	171.667	-1.26352	0.783615	-1.61243	0.106869	0.361749
ENSG00000273888	FRMD6-AS1	antisense	FRMD6 antisense RNA 1	86.1529	-0.168074	0.723371	-0.232348	0.816268	0.978934
ENSG00000272264	AC009686.2	lincRNA		4.58875	1.48895	4.6393	0.320943	0.748254	0.957
ENSG00000089597	GANAB	protein_coding	glucosidase II alpha subunit	91748.6	-0.369314	0.233324	-1.58284	0.113459	0.375554
ENSG00000123364	HOXC13	protein_coding	homeobox C13	71.0635	0.393115	0.695698	0.565065	0.572029	0.867272
ENSG00000253400	AL356133.2	lincRNA		0.577836	-1.1168	4.58829	-0.243403	0.807693	0.976088
ENSG00000058272	PPP1R12A	protein_coding	protein phosphatase 1 regulatory subunit 12A	142.519	0.969915	0.599631	1.61752	0.105766	0.359443
ENSG00000133422	MORC2	protein_coding	MORC family CW-type zinc finger 2	1851.13	-0.0793205	0.174109	-0.45558	0.648692	0.909999
ENSG00000124731	TREM1	protein_coding	triggering receptor expressed on myeloid cells 1	5.58782	5.4472	4.37038	1.24639	0.212621	0.553893
ENSG00000234332	BCAS2P2	processed_pseudogene	BCAS2, pre-mRNA processing factor pseudogene 2	1.34139	-5.0868	4.67466	-1.08816	0.276522	0.637475
ENSG00000196951	SCOC-AS1	antisense	SCOC antisense RNA 1	10.4404	1.4445	1.51661	0.952458	0.340865	0.69852
ENSG00000133794	ARNTL	protein_coding	aryl hydrocarbon receptor nuclear translocator like	314.749	-0.145186	0.330977	-0.43866	0.660908	0.915577
ENSG00000153933	DGKE	protein_coding	diacylglycerol kinase epsilon	127.953	1.02341	0.787627	1.29936	0.193819	0.523881
ENSG00000167978	SRRM2	protein_coding	serine/arginine repetitive matrix 2	11759.6	-0.901583	0.495247	-1.82047	0.0686871	0.267226
ENSG00000079387	SENP1	protein_coding	SUMO1/sentrin specific peptidase 1	408.622	-0.0986299	0.549294	-0.179557	0.8575	0.989785
ENSG00000235587	GAPDHP65	processed_pseudogene	glyceraldehyde 3 phosphate dehydrogenase pseudogene 65	39.6611	0.0681038	0.619411	0.109949	0.912449	0.996331
ENSG00000230662	TNPO1P2	processed_pseudogene	transportin 1 pseudogene 2	4.94834	-1.83615	1.95928	-0.937154	0.348679	0.703637
ENSG00000070950	RAD18	protein_coding	RAD18, E3 ubiquitin protein ligase	240.158	0.579532	0.811259	0.714361	0.475004	0.799715
ENSG00000150712	MTMR12	protein_coding	myotubularin related protein 12	1069.4	-0.393449	0.418006	-0.941254	0.346575	0.702798
ENSG00000185885	IFITM1	protein_coding	interferon induced transmembrane protein 1	529.379	0.0372847	0.492474	0.0757089	0.939651	0.996331
ENSG00000257279	AC127164.1	antisense		1.14991	1.17016	4.60212	0.254267	0.79929	0.974069
ENSG00000250220	AC053527.1	antisense		2.66676	4.5151	4.53862	0.994816	0.319826	0.680981
ENSG00000277986	RF00015	snRNA		5.20857	3.81278	1.57862	2.41526	0.0157238	0.0864523
ENSG00000251660	AC007036.3	sense_overlapping		33.5526	0.286851	0.779643	0.367926	0.712928	0.942488
ENSG00000116977	LGALS8	protein_coding	galectin 8	639.175	0.436904	0.534106	0.818009	0.413352	0.751597
ENSG00000119669	IRF2BPL	protein_coding	interferon regulatory factor 2 binding protein like	16509.9	-0.533727	0.163823	-3.25796	0.00112218	0.00914696
ENSG00000120820	GLT8D2	protein_coding	glycosyltransferase 8 domain containing 2	11.7509	1.70891	2.28955	0.746398	0.455427	0.783259
ENSG00000253632	AC084026.2	lincRNA		1.04757	2.08904	4.54993	0.459137	0.646136	0.908397
[truncated: 25,912 more rows]

## Sheet: Condition_miR211_vs_Control
id	gene_name	biotype	description	baseMean	log2FoldChange	lfcSE	stat	pvalue	padj
[truncated: 27,249 more rows]
