# Supplementary material for: BRAFV600E induces reversible mitotic arrest in human melanocytes via microRNA-mediated suppression of AURKB
Source: bioRxiv preprint, doi:10.1101/2020.05.21.109397, version 3 (2021-09-19)
Supplement: Table S5 [file 109397_file07.xlsx]

## Sheet: miR  +TPA vs TPAfree
id	baseMean	log2FoldChange	lfcSE	stat	pvalue	padj	gene_name
hsa-let-7a-2-3p	60.1212	-2.13619	0.312647	-6.75193	1.45888e-11	2.62688e-10	let-7a-2-3p
hsa-let-7a-3p	442.214	0.22122	0.215126	1.02834	0.303789	0.481986	let-7a-3p
hsa-let-7a-5p	83333.4	-0.396276	0.154595	-2.56331	0.0103679	0.0348609	let-7a-5p
hsa-let-7b-3p	106.089	-0.810983	0.222164	-3.64834	0.000263939	0.00139185	let-7b-3p
hsa-let-7b-5p	45409.6	-0.690939	0.149959	-4.60744	4.07666e-06	3.39567e-05	let-7b-5p
hsa-let-7c-3p	37.0709	-1.0596	0.338379	-3.1206	0.0018048	0.00755955	let-7c-3p
hsa-let-7c-5p	4550.39	-1.17042	0.171281	-6.83278	8.32818e-12	1.60646e-10	let-7c-5p
hsa-let-7d-3p	1366.28	-0.899999	0.15642	-5.75322	8.75575e-09	1.10655e-07	let-7d-3p
hsa-let-7d-5p	9542.31	-0.212468	0.139841	-1.51934	0.128676	0.257001	let-7d-5p
hsa-let-7e-3p	78.0039	-0.628886	0.24658	-2.54949	0.010788	0.035781	let-7e-3p
hsa-let-7e-5p	67956.1	-0.279316	0.132711	-2.10468	0.0353192	0.0944854	let-7e-5p
hsa-let-7f-1-3p	135.644	0.0200755	0.223034	0.0900452	0.928251	0.947644	let-7f-1-3p
hsa-let-7f-2-3p	150.126	0.565637	0.273281	2.07109	0.0383506	0.100714	let-7f-2-3p
hsa-let-7f-5p	152107	0.0675765	0.16916	0.399481	0.689539	0.823247	let-7f-5p
hsa-let-7g-3p	81.08	0.660366	0.234623	2.81355	0.00489979	0.0183242	let-7g-3p
hsa-let-7g-5p	56452.4	0.229018	0.130452	1.75558	0.0791606	0.176905	let-7g-5p
hsa-let-7i-3p	2150.56	1.03321	0.180998	5.70846	1.14003e-08	1.41634e-07	let-7i-3p
hsa-let-7i-5p	640959	0.702086	0.183885	3.81811	0.000134479	0.000758256	let-7i-5p
hsa-miR-1-3p	34.7214	-0.96044	0.621873	-1.68562	0.0918684	0.197477	miR-1-3p
hsa-miR-100-3p	964.303	-1.89203	0.433771	-4.41555	1.00755e-05	7.74858e-05	miR-100-3p
hsa-miR-100-5p	8925.78	-1.8117	0.185659	-9.76017	1.6688e-22	8.15485e-21	miR-100-5p
hsa-miR-101-2-5p	9.13263	0.705374	0.495059	1.4234	0.154621	0.294333	miR-101-2-5p
hsa-miR-101-3p	14006.3	1.49036	0.189659	7.85843	3.88981e-15	1.09663e-13	miR-101-3p
hsa-miR-101-5p	18.9185	1.30506	0.404247	3.1932	0.00140707	0.00606696	miR-101-5p
hsa-miR-10393-3p	1.48569	-0.568025	0.627484	-0.792541	0.428045		miR-10393-3p
hsa-miR-10395-3p	17.6337	-0.394546	0.463213	-0.849563	0.395568	0.573027	miR-10395-3p
hsa-miR-10395-5p	92.7852	-1.17598	0.290491	-4.04015	5.34164e-05	0.000337536	miR-10395-5p
hsa-miR-10397-5p	3.07511	-0.720078	0.622622	-1.13521	0.256289	0.425987	miR-10397-5p
hsa-miR-10399-3p	3.53256	0.675517	0.622272	1.10902	0.267423	0.441489	miR-10399-3p
hsa-miR-10399-5p	6.38645	0.663747	0.56512	1.15797	0.246876	0.417764	miR-10399-5p
hsa-miR-103a-1-5p	4.58138	-0.718263	0.585411	-1.23231	0.217832	0.382905	miR-103a-1-5p
hsa-miR-103a-2-5p	12.174	-0.0652021	0.453482	-0.142558	0.886639	0.935442	miR-103a-2-5p
hsa-miR-103a-3p	28846.1	0.12713	0.131414	0.967396	0.333346	0.514405	miR-103a-3p
hsa-miR-10523-5p	4.87185	1.085	0.606998	1.82799	0.067551	0.158194	miR-10523-5p
hsa-miR-10526-3p	3.17469	-1.57438	0.641914	-2.84271	0.00447317	0.0170427	miR-10526-3p
hsa-miR-106a-3p	206.021	-0.909254	0.175118	-5.19119	2.08954e-07	2.09813e-06	miR-106a-3p
hsa-miR-106a-5p	12.8265	-1.32615	0.463899	-2.82351	0.00475012	0.0179476	miR-106a-5p
hsa-miR-106b-3p	597.06	0.14737	0.150243	0.980772	0.326705	0.50629	miR-106b-3p
hsa-miR-106b-5p	312.806	0.876591	0.175054	5.00696	5.52959e-07	5.26388e-06	miR-106b-5p
hsa-miR-107	3381.7	0.567715	0.160398	3.53932	0.000401158	0.00200033	miR-107
hsa-miR-10a-3p	544.52	0.499808	0.143066	3.49327	0.000477135	0.0023316	miR-10a-3p
hsa-miR-10a-5p	6424.87	0.486791	0.127686	3.81238	0.000137637	0.000770138	miR-10a-5p
hsa-miR-10b-3p	742.117	0.549724	0.131891	4.16768	3.0772e-05	0.000208851	miR-10b-3p
hsa-miR-10b-5p	9970.28	0.625555	0.14734	4.2456	2.18007e-05	0.000153653	miR-10b-5p
hsa-miR-1179	5.63435	-0.75593	0.600774	-1.24363	0.213637	0.37703	miR-1179
hsa-miR-1180-3p	78.3002	-0.275434	0.252011	-1.09286	0.274454	0.449051	miR-1180-3p
hsa-miR-1185-1-3p	2.72693	-1.47167	0.637344	-2.57452	0.0100378	0.034222	miR-1185-1-3p
hsa-miR-12114	4.05596	-0.952558	0.633084	-1.4672	0.142321	0.27647	miR-12114
hsa-miR-12135	3.74382	1.68272	0.636453	2.65733	0.00787631	0.0280259	miR-12135
hsa-miR-12136	20.6993	-2.42448	0.41418	-5.66635	1.45875e-08	1.7821e-07	miR-12136
hsa-miR-122-5p	48.7511	2.22417	0.324955	6.7509	1.46933e-11	2.62688e-10	miR-122-5p
hsa-miR-1226-3p	82.1529	-0.696154	0.258701	-2.68976	0.0071504	0.025567	miR-1226-3p
hsa-miR-1227-3p	3.7979	0.0667822	0.631535	0.103847	0.917291	0.944346	miR-1227-3p
hsa-miR-1228-3p	4.89723	-1.11821	0.58897	-1.85936	0.0629767	0.150718	miR-1228-3p
hsa-miR-1228-5p	3.85584	-1.76009	0.626786	-2.60552	0.00917341	0.0320196	miR-1228-5p
hsa-miR-1229-3p	10.2932	-1.47497	0.506471	-2.85475	0.00430704	0.0165291	miR-1229-3p
hsa-miR-1237-3p	4.26452	-0.31697	0.618224	-0.501276	0.616177	0.759089	miR-1237-3p
hsa-miR-1248	2647.23	-1.10517	0.423871	-2.59744	0.00939205	0.032321	miR-1248
hsa-miR-1249-3p	35.7542	-0.440235	0.338738	-1.29902	0.193936	0.346719	miR-1249-3p
hsa-miR-1250-5p	4.7532	-0.270245	0.581624	-0.467448	0.640179	0.781846	miR-1250-5p
hsa-miR-1252-5p	2.16708	-1.02539	0.637508	-2.06574	0.0388533	0.10135	miR-1252-5p
hsa-miR-1255a	5.68913	0.690303	0.599466	1.19711	0.231262	0.398955	miR-1255a
hsa-miR-125a-3p	288.45	-0.247501	0.15354	-1.61199	0.106965	0.220081	miR-125a-3p
hsa-miR-125a-5p	122029	-0.46879	0.1994	-2.35079	0.0187338	0.0562782	miR-125a-5p
hsa-miR-125b-1-3p	47.7319	-2.37375	0.348007	-6.69595	2.14272e-11	3.65259e-10	miR-125b-1-3p
hsa-miR-125b-2-3p	6.79351	0.125038	0.556648	0.220226	0.825695	0.911498	miR-125b-2-3p
hsa-miR-125b-5p	73209.9	-1.87162	0.153205	-12.2171	2.52057e-34	4.61895e-32	miR-125b-5p
hsa-miR-126-3p	12731.3	0.228567	0.165419	1.38172	0.167058	0.312382	miR-126-3p
hsa-miR-126-5p	2465.75	0.779074	0.172215	4.52384	6.07275e-06	4.89157e-05	miR-126-5p
hsa-miR-1262	59.4573	-0.916968	0.289927	-3.16067	0.00157408	0.00670816	miR-1262
hsa-miR-1264	2.38787	0.551571	0.639604	0.850349	0.395131	0.573027	miR-1264
hsa-miR-1269a	3.17529	-0.839453	0.642015	-1.3459	0.178336	0.325985	miR-1269a
hsa-miR-127-3p	46.1429	-4.03609	0.374746	-9.78016	1.36994e-22	8.15485e-21	miR-127-3p
hsa-miR-127-5p	1.86094	-0.996422	0.638027	-1.68371	0.0922375	0.19769	miR-127-5p
hsa-miR-1271-5p	168.212	-0.0941039	0.236666	-0.397669	0.690874	0.823415	miR-1271-5p
hsa-miR-1275	3.13397	-0.324133	0.6337	-0.502874	0.615053	0.758979	miR-1275
hsa-miR-1276	2.29364	0.665574	0.644001	1.12966	0.25862	0.428887	miR-1276
hsa-miR-1277-3p	91.5654	0.859475	0.494368	1.74901	0.0802885	0.17888	miR-1277-3p
hsa-miR-1277-5p	16.4507	-0.0803411	0.417044	-0.191512	0.848125	0.923737	miR-1277-5p
hsa-miR-1278	17.6447	-0.0285026	0.406855	-0.068196	0.94563	0.962704	miR-1278
hsa-miR-128-1-5p	33.0187	-0.109433	0.31444	-0.348593	0.727395	0.849013	miR-128-1-5p
hsa-miR-128-3p	11784.6	0.228493	0.123519	1.84986	0.0643342	0.152612	miR-128-3p
hsa-miR-1286	3.55321	1.17528	0.620076	1.83666	0.0662599	0.156169	miR-1286
hsa-miR-1287-5p	77.3971	-1.625	0.263423	-6.15022	7.73773e-10	1.07014e-08	miR-1287-5p
hsa-miR-129-1-3p	11.2397	-2.13364	0.535037	-3.82135	0.000132724	0.000754161	miR-129-1-3p
hsa-miR-129-2-3p	4.66053	1.07367	0.595246	1.70655	0.0879066	0.191772	miR-129-2-3p
hsa-miR-129-5p	123.577	-1.19596	0.213165	-5.60377	2.09743e-08	2.4797e-07	miR-129-5p
hsa-miR-1291	1287.3	-1.09413	0.275458	-3.96905	7.21599e-05	0.000440777	miR-1291
hsa-miR-1292-5p	48.8144	-0.142692	0.271423	-0.526226	0.598731	0.747649	miR-1292-5p
hsa-miR-1294	5.35022	-0.44759	0.565396	-0.792399	0.428128	0.602337	miR-1294
hsa-miR-1296-5p	170.322	-0.756691	0.251963	-3.00177	0.00268414	0.0108103	miR-1296-5p
hsa-miR-1297	4.00019	-0.0161743	0.593168	-0.027577	0.978	0.983217	miR-1297
hsa-miR-1298-5p	1.58538	0.486973	0.435041	1.23288	0.21762		miR-1298-5p
hsa-miR-1301-3p	798.902	-0.120136	0.173058	-0.694232	0.487537	0.652125	miR-1301-3p
hsa-miR-1304-5p	1.99379	-0.35591	0.644423	-0.511953	0.608684	0.754933	miR-1304-5p
hsa-miR-1305	5.33804	-0.563999	0.614514	-0.929374	0.352696	0.532549	miR-1305
hsa-miR-1306-3p	3.33963	-0.102842	0.612646	-0.16836	0.8663	0.929719	miR-1306-3p
hsa-miR-1306-5p	106.599	-1.14398	0.334318	-3.41202	0.000644832	0.00302988	miR-1306-5p
hsa-miR-1307-3p	1034.02	-0.304881	0.179405	-1.69941	0.0892429	0.19411	miR-1307-3p
hsa-miR-1307-5p	396.507	1.04618	0.214401	4.87914	1.06547e-06	9.64184e-06	miR-1307-5p
hsa-miR-130a-3p	34557.1	-0.00580718	0.176605	-0.0328838	0.973767	0.98276	miR-130a-3p
hsa-miR-130a-5p	66.3819	-0.101845	0.348164	-0.29243	0.769958	0.876365	miR-130a-5p
hsa-miR-130b-3p	7356.93	0.358788	0.161334	2.22389	0.026156	0.0737398	miR-130b-3p
hsa-miR-130b-5p	166.465	-0.202534	0.205951	-0.983457	0.325383	0.50629	miR-130b-5p
hsa-miR-132-3p	379.018	0.784483	0.218839	3.58437	0.00033789	0.00171995	miR-132-3p
hsa-miR-132-5p	42.5681	0.80861	0.326469	2.47757	0.013228	0.042527	miR-132-5p
hsa-miR-133a-3p	4.30973	-1.68434	0.63208	-2.55408	0.0106468	0.0356353	miR-133a-3p
hsa-miR-134-5p	20.4318	-3.97423	0.523502	-5.84106	5.18708e-09	6.6704e-08	miR-134-5p
hsa-miR-1343-3p	4.49115	-0.0951409	0.598783	-0.159047	0.873632	0.932802	miR-1343-3p
hsa-miR-135b-3p	3.38951	-0.970956	0.635592	-1.58039	0.114017	0.232151	miR-135b-3p
hsa-miR-135b-5p	192.187	-0.880768	0.250383	-3.52169	0.000428812	0.00210952	miR-135b-5p
hsa-miR-136-3p	4.76142	-0.789198	0.638349	-1.20881	0.226734	0.39383	miR-136-3p
hsa-miR-137-3p	1199.36	-2.3874	0.185869	-12.8401	9.77866e-38	3.58388e-35	miR-137-3p
hsa-miR-137-5p	12.8397	-2.84507	0.517117	-4.95357	7.28636e-07	6.84731e-06	miR-137-5p
hsa-miR-138-1-3p	20.7355	-0.183201	0.392989	-0.466232	0.64105	0.781846	miR-138-1-3p
hsa-miR-138-5p	772.017	0.638634	0.190311	3.35559	0.000791961	0.00365099	miR-138-5p
hsa-miR-139-5p	4.37928	0.499409	0.622794	0.842503	0.399506	0.574192	miR-139-5p
hsa-miR-140-3p	8381.69	0.39019	0.132595	2.94272	0.0032534	0.0127397	miR-140-3p
hsa-miR-140-5p	1704.44	0.395618	0.189367	2.08914	0.0366951	0.0971029	miR-140-5p
hsa-miR-141-3p	24.823	0.840187	0.399242	2.11409	0.0345075	0.0926521	miR-141-3p
hsa-miR-142-3p	10.5747	0.394586	0.511525	0.769033	0.441874	0.612275	miR-142-3p
hsa-miR-142-5p	7.91553	1.37198	0.587698	2.29955	0.021474	0.0622151	miR-142-5p
hsa-miR-143-3p	7.24057	0.204259	0.522035	0.386513	0.699116	0.829211	miR-143-3p
hsa-miR-144-3p	0.531109	0.565852	0.430858	0.969383	0.332354		miR-144-3p
hsa-miR-145-5p	9.3721	0.127377	0.478984	0.263255	0.792354	0.889426	miR-145-5p
hsa-miR-1468-5p	5.22989	-1.26416	0.59905	-2.06372	0.0390438	0.101486	miR-1468-5p
hsa-miR-146a-3p	1582.76	2.32086	0.185128	12.5332	4.91505e-36	1.20091e-33	miR-146a-3p
hsa-miR-146a-5p	1.11965e+06	1.63484	0.11702	13.9706	2.35783e-44	1.72829e-41	miR-146a-5p
hsa-miR-146b-3p	1.18332	0.0503909	0.606718	0.0617697	0.950746		miR-146b-3p
hsa-miR-146b-5p	1236.59	1.26842	0.162834	7.7888	6.76473e-15	1.77091e-13	miR-146b-5p
hsa-miR-147b-3p	3.05503	0.496289	0.63748	0.773922	0.438977	0.609413	miR-147b-3p
hsa-miR-148a-3p	18593.6	-0.0211965	0.211589	-0.100174	0.920206	0.944565	miR-148a-3p
hsa-miR-148a-5p	13.2225	0.0606896	0.430483	0.139022	0.889433	0.935442	miR-148a-5p
hsa-miR-148b-3p	16366	0.0959962	0.128702	0.745879	0.455741	0.627019	miR-148b-3p
hsa-miR-148b-5p	108.67	0.599055	0.203905	2.93939	0.00328856	0.012754	miR-148b-5p
hsa-miR-149-5p	371.339	-1.90798	0.250038	-7.625	2.44034e-14	5.26108e-13	miR-149-5p
hsa-miR-150-5p	8.80684	-1.00672	0.548073	-1.83413	0.0666354	0.15655	miR-150-5p
hsa-miR-151a-3p	18997	-0.280265	0.160928	-1.74153	0.0815906	0.18123	miR-151a-3p
hsa-miR-151a-5p	103.504	-0.155697	0.214077	-0.727235	0.467082	0.635197	miR-151a-5p
hsa-miR-151b	17.3394	0.423979	0.392749	1.07778	0.281131	0.456915	miR-151b
hsa-miR-152-3p	14618.5	-0.0689916	0.124353	-0.554806	0.579027	0.734365	miR-152-3p
hsa-miR-152-5p	10.1288	-0.272505	0.490711	-0.554735	0.579076	0.734365	miR-152-5p
hsa-miR-1537-3p	34.2085	0.894516	0.383672	2.32142	0.0202641	0.0596528	miR-1537-3p
hsa-miR-1537-5p	106.295	1.09216	0.268951	4.05651	4.98113e-05	0.000320278	miR-1537-5p
hsa-miR-155-5p	2649.93	1.42011	0.159678	8.89461	5.86241e-19	2.14857e-17	miR-155-5p
hsa-miR-15a-3p	28.5215	0.6054	0.352236	1.72075	0.0852956	0.187191	miR-15a-3p
hsa-miR-15a-5p	10132.5	0.745393	0.138341	5.38809	7.12093e-08	7.67594e-07	miR-15a-5p
hsa-miR-15b-3p	2739.84	0.470468	0.204339	2.30228	0.0213195	0.0620127	miR-15b-3p
hsa-miR-15b-5p	21796.9	0.343699	0.146109	2.35231	0.0186575	0.0562782	miR-15b-5p
hsa-miR-16-1-3p	116.178	0.725316	0.301238	2.40907	0.0159932	0.0497656	miR-16-1-3p
hsa-miR-16-2-3p	244.082	0.447022	0.19141	2.33536	0.0195247	0.0584148	miR-16-2-3p
hsa-miR-16-5p	353119	0.236268	0.123622	1.91121	0.0559778	0.13723	miR-16-5p
hsa-miR-17-3p	211.76	0.867425	0.2319	3.74022	0.000183857	0.000998274	miR-17-3p
hsa-miR-17-5p	2934.82	0.496338	0.136798	3.6282	0.000285405	0.0014837	miR-17-5p
hsa-miR-181a-2-3p	2743.1	-2.15052	0.178966	-12.014	2.99921e-33	3.66404e-31	miR-181a-2-3p
hsa-miR-181a-3p	592.785	-0.548959	0.18582	-2.95432	0.00313362	0.0124159	miR-181a-3p
hsa-miR-181a-5p	1821.17	-1.26279	0.157386	-8.02304	1.0316e-15	3.15066e-14	miR-181a-5p
hsa-miR-181b-2-3p	354.727	-2.09903	0.196132	-10.69	1.13367e-26	1.03873e-24	miR-181b-2-3p
hsa-miR-181b-3p	85.1755	-0.173706	0.264862	-0.65555	0.512113	0.674688	miR-181b-3p
hsa-miR-181b-5p	1557.17	-1.68201	0.151872	-11.0737	1.68261e-28	1.76194e-26	miR-181b-5p
hsa-miR-181c-3p	29.3217	-0.544513	0.351126	-1.54909	0.121359	0.244385	miR-181c-3p
hsa-miR-181c-5p	11.479	0.319007	0.502891	0.636155	0.524675	0.684318	miR-181c-5p
hsa-miR-181d-5p	13.2362	-0.62976	0.45231	-1.38801	0.165134	0.310367	miR-181d-5p
hsa-miR-182-5p	24.3433	0.0144474	0.395739	0.0421904	0.966347	0.979713	miR-182-5p
hsa-miR-183-5p	4.73414	-0.655496	0.607973	-1.13813	0.255065	0.42503	miR-183-5p
hsa-miR-184	13.0301	-1.7478	0.457719	-3.70927	0.000207854	0.00112027	miR-184
hsa-miR-1843	28.943	0.0679956	0.369432	0.182814	0.854944	0.929295	miR-1843
hsa-miR-185-3p	53.3442	0.595048	0.295637	2.00767	0.0446785	0.114109	miR-185-3p
hsa-miR-185-5p	8705.33	0.935925	0.140736	6.65013	2.92825e-11	4.8782e-10	miR-185-5p
hsa-miR-186-3p	52.1852	0.721529	0.290168	2.48493	0.0129578	0.0420268	miR-186-3p
hsa-miR-186-5p	17979.9	0.47029	0.15322	3.0694	0.00214487	0.00883074	miR-186-5p
hsa-miR-187-3p	57.7013	-2.49654	0.327412	-7.49717	6.52084e-14	1.36565e-12	miR-187-3p
hsa-miR-188-3p	13.5052	0.994447	0.466972	2.1222	0.0338212	0.0911431	miR-188-3p
hsa-miR-188-5p	89.6561	0.754298	0.223429	3.37397	0.000740932	0.00343736	miR-188-5p
hsa-miR-18a-3p	27.649	0.0571944	0.364662	0.156561	0.875591	0.932802	miR-18a-3p
hsa-miR-18a-5p	922.652	0.643411	0.188786	3.40815	0.000654059	0.00305366	miR-18a-5p
hsa-miR-18b-3p	9.74091	-1.18243	0.487358	-2.38318	0.0171637	0.0528615	miR-18b-3p
hsa-miR-18b-5p	71.0843	-1.51231	0.282232	-5.34359	9.1125e-08	9.40769e-07	miR-18b-5p
hsa-miR-1908-3p	2.57242	-0.211294	0.643162	-0.316259	0.751806	0.86185	miR-1908-3p
hsa-miR-1908-5p	5.80872	-0.692938	0.572837	-1.17355	0.240576	0.410099	miR-1908-5p
hsa-miR-190a-3p	4.88993	-0.910638	0.611116	-1.46187	0.143778	0.278072	miR-190a-3p
hsa-miR-190a-5p	2225.8	-0.704086	0.239833	-2.93607	0.00332399	0.0128236	miR-190a-5p
hsa-miR-190b-5p	63.7834	-0.146376	0.265678	-0.550886	0.581712	0.735422	miR-190b-5p
hsa-miR-191-3p	271.666	-0.419412	0.18009	-2.32888	0.0198656	0.0591929	miR-191-3p
hsa-miR-191-5p	128205	-0.187673	0.157908	-1.18847	0.234648	0.402803	miR-191-5p
hsa-miR-1911-5p	2.66671	0.0953522	0.644795	0.14147	0.887499	0.935442	miR-1911-5p
hsa-miR-1914-3p	2.95944	-0.564857	0.636913	-0.882652	0.377424	0.556644	miR-1914-3p
hsa-miR-1914-5p	3.47633	-1.04892	0.626108	-1.67845	0.09326	0.198473	miR-1914-5p
hsa-miR-192-3p	22.7682	0.967813	0.375973	2.55141	0.0107288	0.0357462	miR-192-3p
hsa-miR-192-5p	2871.27	0.886926	0.135007	6.56942	5.05118e-11	8.04894e-10	miR-192-5p
hsa-miR-193a-3p	24.1013	0.549984	0.369079	1.49453	0.135037	0.266799	miR-193a-3p
hsa-miR-193a-5p	966.555	-0.311147	0.174494	-1.78316	0.0745605	0.168715	miR-193a-5p
hsa-miR-193b-3p	60.3345	-0.473854	0.340867	-1.39043	0.164399	0.30978	miR-193b-3p
hsa-miR-193b-5p	199.874	-1.03847	0.207338	-5.00702	5.52779e-07	5.26388e-06	miR-193b-5p
hsa-miR-194-3p	7.11965	0.429204	0.546019	0.78216	0.434121	0.608039	miR-194-3p
hsa-miR-194-5p	635.032	0.759596	0.129735	5.85455	4.78294e-09	6.26053e-08	miR-194-5p
hsa-miR-195-3p	24.6626	-0.930402	0.418586	-2.21824	0.0265385	0.0745314	miR-195-3p
hsa-miR-195-5p	466.419	-0.217658	0.164539	-1.32281	0.1859	0.335627	miR-195-5p
hsa-miR-196a-3p	27.7303	0.569799	0.350124	1.63076	0.102942	0.214087	miR-196a-3p
hsa-miR-196a-5p	7529.1	-0.0821332	0.150921	-0.544213	0.586295	0.738397	miR-196a-5p
hsa-miR-196b-5p	78.1093	1.39902	0.259684	5.37269	7.7572e-08	8.24062e-07	miR-196b-5p
hsa-miR-197-3p	376.906	-0.108837	0.203973	-0.53365	0.593584	0.742486	miR-197-3p
hsa-miR-197-5p	10.2427	-0.155645	0.485391	-0.320086	0.748903	0.86185	miR-197-5p
hsa-miR-1976	5.60044	0.221018	0.582926	0.383885	0.701064	0.830177	miR-1976
hsa-miR-199a-3p	392.636	-1.2368	0.158922	-7.78183	7.14826e-15	1.80679e-13	miR-199a-3p
hsa-miR-199a-5p	8.91401	-1.00222	0.512382	-1.9404	0.0523316	0.130031	miR-199a-5p
hsa-miR-199b-5p	1520.11	-0.97656	0.166482	-5.86644	4.45238e-09	5.93381e-08	miR-199b-5p
hsa-miR-19a-3p	6675.48	1.46129	0.230652	6.33642	2.35165e-10	3.37992e-09	miR-19a-3p
hsa-miR-19b-1-5p	15.5129	0.907387	0.442196	2.04888	0.0404734	0.104461	miR-19b-1-5p
hsa-miR-19b-3p	12791.2	0.924655	0.220772	4.18862	2.80657e-05	0.000192263	miR-19b-3p
hsa-miR-200a-3p	21.1958	0.38493	0.358789	1.06907	0.285037	0.461684	miR-200a-3p
hsa-miR-200b-3p	16.1811	0.871526	0.421976	2.06979	0.038472	0.100714	miR-200b-3p
hsa-miR-200c-3p	15.2889	0.284873	0.424628	0.670966	0.502242	0.66572	miR-200c-3p
hsa-miR-203a-3p	215.313	-0.210718	0.309123	-0.681926	0.495286	0.660081	miR-203a-3p
hsa-miR-204-5p	239.577	0.0319513	0.211343	0.151132	0.879872	0.932802	miR-204-5p
hsa-miR-205-5p	3.27045	-0.558485	0.644493	-0.904977	0.365477	0.543902	miR-205-5p
hsa-miR-20a-3p	195.909	1.2005	0.213977	5.60881	2.03721e-08	2.44799e-07	miR-20a-3p
hsa-miR-20a-5p	15675.4	0.989991	0.126578	7.82127	5.22927e-15	1.41965e-13	miR-20a-5p
hsa-miR-20b-5p	16503.7	-1.19633	0.147802	-8.0941	5.76893e-16	1.9221e-14	miR-20b-5p
hsa-miR-21-3p	2003.21	-0.420592	0.201298	-2.08984	0.0366318	0.0971029	miR-21-3p
hsa-miR-21-5p	94500.8	-0.24275	0.149514	-1.62366	0.104448	0.216273	miR-21-5p
hsa-miR-210-3p	1299.06	-0.376196	0.200936	-1.87225	0.0611717	0.147496	miR-210-3p
hsa-miR-210-5p	1.11484	0.428998	0.593991	0.847292	0.396832		miR-210-5p
hsa-miR-211-3p	357.77	2.08589	0.219996	9.4676	2.8636e-21	1.23472e-19	miR-211-3p
hsa-miR-211-5p	28414.8	2.17477	0.21165	10.2731	9.31183e-25	6.82557e-23	miR-211-5p
hsa-miR-2110	89.6299	-0.179473	0.250504	-0.716719	0.473547	0.638229	miR-2110
hsa-miR-2116-3p	48.2744	-1.36334	0.274737	-4.94126	7.76203e-07	7.20198e-06	miR-2116-3p
hsa-miR-2116-5p	58.1913	-1.07493	0.273358	-3.9272	8.5939e-05	0.000512141	miR-2116-5p
hsa-miR-212-3p	21.3737	1.49618	0.441887	3.34479	0.000823459	0.00377247	miR-212-3p
hsa-miR-212-5p	6.0921	1.09429	0.61333	1.79937	0.0719602	0.16587	miR-212-5p
hsa-miR-215-5p	36.9311	0.578811	0.290382	1.98947	0.0466491	0.11791	miR-215-5p
hsa-miR-216a-3p	1.21389	0.756675	0.603449	1.26216	0.206893		miR-216a-3p
hsa-miR-216a-5p	7.79654	0.638103	0.597324	1.04233	0.297259	0.473676	miR-216a-5p
hsa-miR-217-5p	3.40836	0.847514	0.632745	1.35986	0.173875	0.321844	miR-217-5p
hsa-miR-218-5p	366.667	0.865279	0.191754	4.51313	6.38791e-06	5.03477e-05	miR-218-5p
hsa-miR-219a-1-3p	6.66755	-0.950775	0.564601	-1.67969	0.0930179	0.198473	miR-219a-1-3p
hsa-miR-219a-5p	24.0355	1.319	0.435856	3.0168	0.00255459	0.0103454	miR-219a-5p
hsa-miR-219b-5p	11.7464	0.697163	0.473502	1.45345	0.146098	0.281077	miR-219b-5p
hsa-miR-22-3p	12388.5	-0.518961	0.137955	-3.76183	0.000168675	0.000924271	miR-22-3p
hsa-miR-22-5p	262.559	-0.408329	0.17574	-2.32341	0.0201573	0.059578	miR-22-5p
hsa-miR-221-3p	48992.4	-0.23871	0.123847	-1.92752	0.0539147	0.133062	miR-221-3p
hsa-miR-221-5p	487.036	-0.198556	0.166139	-1.195	0.232087	0.399342	miR-221-5p
hsa-miR-222-3p	8854.53	-0.369565	0.131962	-2.80066	0.00509983	0.0187848	miR-222-3p
hsa-miR-222-5p	104.327	-0.0335745	0.25866	-0.126097	0.899655	0.937415	miR-222-5p
hsa-miR-223-3p	15.1553	-0.243216	0.514114	-0.47507	0.634737	0.77803	miR-223-3p
hsa-miR-2276-3p	6.18199	0.050367	0.572579	0.0992079	0.920973	0.944565	miR-2276-3p
hsa-miR-2277-3p	13.6922	-0.653079	0.433973	-1.50021	0.13356	0.264593	miR-2277-3p
hsa-miR-2277-5p	6.10572	-0.750762	0.569057	-1.29974	0.19369	0.346719	miR-2277-5p
hsa-miR-2278	35.8716	0.115609	0.321275	0.360959	0.71813	0.843463	miR-2278
hsa-miR-2355-3p	30.999	-0.525723	0.350304	-1.50151	0.133223	0.264593	miR-2355-3p
hsa-miR-2355-5p	6.8927	-0.727588	0.554561	-1.31689	0.187876	0.338362	miR-2355-5p
hsa-miR-23a-3p	79337.8	-0.189825	0.131741	-1.4409	0.149613	0.287085	miR-23a-3p
hsa-miR-23a-5p	139.945	-0.82867	0.190898	-4.33986	1.42571e-05	0.000106638	miR-23a-5p
hsa-miR-23b-3p	2951.81	-1.47122	0.138191	-10.6459	1.82201e-26	1.48392e-24	miR-23b-3p
hsa-miR-23b-5p	44.67	-1.59759	0.294829	-5.38844	7.10727e-08	7.67594e-07	miR-23b-5p
hsa-miR-23c	222.069	-0.557048	0.23115	-2.4094	0.0159788	0.0497656	miR-23c
hsa-miR-24-1-5p	3.60926	-1.94806	0.629728	-2.74584	0.0060357	0.0219018	miR-24-1-5p
hsa-miR-24-2-5p	26.1517	-0.541912	0.390605	-1.38342	0.166536	0.312202	miR-24-2-5p
hsa-miR-24-3p	45741.3	-0.228725	0.112604	-2.03124	0.0422304	0.108234	miR-24-3p
hsa-miR-25-3p	58326.6	0.352459	0.105833	3.33033	0.000867431	0.00394924	miR-25-3p
hsa-miR-25-5p	127.617	0.342211	0.202485	1.68965	0.0910942	0.196914	miR-25-5p
hsa-miR-2682-3p	26.2428	-3.2471	0.439621	-6.5723	4.95436e-11	8.04894e-10	miR-2682-3p
hsa-miR-2682-5p	9.02697	-1.69239	0.553351	-2.98269	0.00285725	0.0113824	miR-2682-5p
hsa-miR-26a-1-3p	272.752	-0.560327	0.200678	-2.79197	0.00523879	0.0192002	miR-26a-1-3p
hsa-miR-26a-2-3p	387.034	-0.158704	0.170872	-0.928802	0.352992	0.532549	miR-26a-2-3p
hsa-miR-26a-5p	17710.9	-0.219308	0.1495	-1.46692	0.142397	0.27647	miR-26a-5p
hsa-miR-26b-3p	166.921	0.108772	0.17939	0.605924	0.544565	0.706209	miR-26b-3p
hsa-miR-26b-5p	86701.9	0.383453	0.153337	2.50071	0.0123944	0.0407402	miR-26b-5p
hsa-miR-27a-3p	127758	0.32852	0.153082	2.14612	0.0318631	0.0861831	miR-27a-3p
hsa-miR-27a-5p	478.153	-0.734813	0.191962	-3.82797	0.000129206	0.000739904	miR-27a-5p
hsa-miR-27b-3p	18639.4	-1.37882	0.17915	-7.69648	1.39861e-14	3.2037e-13	miR-27b-3p
hsa-miR-27b-5p	22.393	-1.28098	0.383114	-3.32116	0.000896435	0.00405609	miR-27b-5p
hsa-miR-28-3p	16486.7	-0.322707	0.137218	-2.35176	0.0186847	0.0562782	miR-28-3p
hsa-miR-28-5p	217.133	-0.199241	0.172864	-1.15262	0.249068	0.419694	miR-28-5p
hsa-miR-296-3p	369.031	-0.463737	0.171776	-2.69943	0.00694577	0.0249571	miR-296-3p
hsa-miR-296-5p	134.844	-0.567299	0.244894	-2.31593	0.0205622	0.0602884	miR-296-5p
hsa-miR-299-3p	8.31512	-2.14708	0.578436	-3.44038	0.000580903	0.00280133	miR-299-3p
hsa-miR-299-5p	2.92174	-1.74617	0.642122	-2.57031	0.0101606	0.0344803	miR-299-5p
hsa-miR-29a-3p	211075	0.668154	0.1658	4.03005	5.57643e-05	0.000349361	miR-29a-3p
hsa-miR-29a-5p	248.275	0.498099	0.176969	2.81602	0.00486232	0.0182773	miR-29a-5p
hsa-miR-29b-1-5p	253.591	0.401877	0.16125	2.49335	0.0126543	0.041409	miR-29b-1-5p
hsa-miR-29b-2-5p	16.5894	-0.065826	0.428351	-0.153925	0.877669	0.932802	miR-29b-2-5p
hsa-miR-29b-3p	40849.6	0.933037	0.388008	2.4084	0.0160228	0.0497656	miR-29b-3p
hsa-miR-29c-3p	2911.19	0.385521	0.2035	1.89453	0.0581547	0.141619	miR-29c-3p
hsa-miR-29c-5p	46.4384	0.389293	0.27247	1.42893	0.153024	0.292101	miR-29c-5p
hsa-miR-301a-3p	4510.11	0.495105	0.253061	1.95669	0.0503842	0.126047	miR-301a-3p
hsa-miR-301a-5p	89.5341	-0.0650734	0.232032	-0.280518	0.77908	0.884003	miR-301a-5p
hsa-miR-301b-3p	264.375	0.907266	0.252189	3.59789	0.000320806	0.00164441	miR-301b-3p
hsa-miR-301b-5p	6.99574	0.597883	0.523113	1.13797	0.255134	0.42503	miR-301b-5p
hsa-miR-302a-5p	23.8415	1.85049	0.499061	3.67901	0.000234138	0.00125272	miR-302a-5p
hsa-miR-302b-3p	7.42533	1.58542	0.588553	2.65482	0.007935	0.0280983	miR-302b-3p
hsa-miR-302d-3p	1.54215	1.42388	0.622733	2.33526	0.0195301		miR-302d-3p
hsa-miR-3064-5p	10.8151	0.171085	0.495708	0.351215	0.725427	0.848067	miR-3064-5p
hsa-miR-3065-3p	80.8584	0.419444	0.24503	1.71456	0.0864257	0.189105	miR-3065-3p
hsa-miR-3065-5p	374.258	0.171009	0.14911	1.14771	0.251087	0.422125	miR-3065-5p
hsa-miR-30a-3p	3263.64	-0.583711	0.142769	-4.08852	4.34136e-05	0.000284126	miR-30a-3p
hsa-miR-30a-5p	29317.6	-0.195078	0.142695	-1.36711	0.171591	0.318951	miR-30a-5p
hsa-miR-30b-3p	130.296	0.847887	0.220094	3.851	0.000117638	0.000684353	miR-30b-3p
hsa-miR-30b-5p	20029.2	1.15356	0.250645	4.60302	4.16403e-06	3.41855e-05	miR-30b-5p
hsa-miR-30c-1-3p	180.525	0.202168	0.170779	1.18318	0.23674	0.405444	miR-30c-1-3p
hsa-miR-30c-2-3p	380.329	-0.791154	0.16467	-4.80396	1.55558e-06	1.37378e-05	miR-30c-2-3p
hsa-miR-30c-5p	13310.2	-0.135193	0.174104	-0.776507	0.43745	0.609413	miR-30c-5p
hsa-miR-30d-3p	402.48	1.54902	0.168806	9.17211	4.63844e-20	1.88888e-18	miR-30d-3p
hsa-miR-30d-5p	47871.9	0.6465	0.163571	3.95235	7.7386e-05	0.000468793	miR-30d-5p
hsa-miR-30e-3p	2318.48	0.404954	0.204268	1.98241	0.0474338	0.119072	miR-30e-3p
hsa-miR-30e-5p	23042.1	0.68947	0.169621	4.06479	4.8075e-05	0.000311849	miR-30e-5p
hsa-miR-31-3p	165.325	1.65798	0.258331	6.41779	1.38269e-10	2.0684e-09	miR-31-3p
hsa-miR-31-5p	7689.3	1.10283	0.164344	6.71214	1.9179e-11	3.34719e-10	miR-31-5p
hsa-miR-3117-3p	13.9672	1.42491	0.446571	3.13479	0.00171978	0.0072867	miR-3117-3p
hsa-miR-3120-3p	5.31602	-0.442942	0.570746	-0.781227	0.434669	0.608039	miR-3120-3p
hsa-miR-3124-5p	2.95592	0.274064	0.638556	0.400548	0.688753	0.823247	miR-3124-5p
hsa-miR-3126-3p	7.95275	-0.508185	0.55475	-0.922638	0.356196	0.536122	miR-3126-3p
hsa-miR-3127-5p	4.72483	0.0141308	0.597899	0.0232701	0.981435	0.98412	miR-3127-5p
hsa-miR-3128	3.72669	-0.155389	0.628917	-0.257026	0.797159	0.893318	miR-3128
hsa-miR-3129-3p	9.46027	-1.19411	0.491282	-2.40239	0.0162885	0.0503775	miR-3129-3p
hsa-miR-3129-5p	27.0965	-1.23413	0.357967	-3.43033	0.000602852	0.00287933	miR-3129-5p
hsa-miR-3131	2.49765	-0.384791	0.644407	-0.604798	0.545313	0.706209	miR-3131
hsa-miR-3136-5p	16.1754	0.0452639	0.406626	0.110822	0.911758	0.940946	miR-3136-5p
hsa-miR-3138	9.70762	-0.460026	0.493953	-0.930013	0.352364	0.532549	miR-3138
hsa-miR-3140-3p	8.05324	0.30737	0.525423	0.57935	0.562353	0.725713	miR-3140-3p
hsa-miR-3143	4.75241	0.908631	0.593795	1.51973	0.128578	0.257001	miR-3143
hsa-miR-3145-3p	14.2275	0.765688	0.445805	1.72317	0.0848585	0.186791	miR-3145-3p
hsa-miR-3146	4.11929	-1.18465	0.614991	-1.87511	0.0607776	0.14703	miR-3146
hsa-miR-3148	2.32471	0.00121624	0.644816	0.00192757	0.998462	0.998462	miR-3148
hsa-miR-3149	1.82015	-0.584304	0.636251	-0.847452	0.396743	0.573596	miR-3149
hsa-miR-3150b-3p	2.68787	0.102207	0.639289	0.174982	0.861094	0.929295	miR-3150b-3p
hsa-miR-3154	7.53528	-1.94956	0.57302	-3.23588	0.00121267	0.00529098	miR-3154
hsa-miR-3157-5p	28.1948	-0.026744	0.339359	-0.0787167	0.937258	0.955508	miR-3157-5p
hsa-miR-3164	13.57	1.01561	0.459732	2.18877	0.0286139	0.0788495	miR-3164
hsa-miR-3168	7.45843	-0.0504628	0.368808	-0.0746067			miR-3168
hsa-miR-3170	4.07591	-0.934878	0.616327	-1.46628	0.142572	0.27647	miR-3170
hsa-miR-3173-5p	46.9621	-0.463067	0.335907	-1.37816	0.168153	0.31363	miR-3173-5p
hsa-miR-3174	3.02172	0.0595244	0.637337	0.0974269	0.922387	0.944565	miR-3174
hsa-miR-3176	9.62132	0.856121	0.500129	1.69544	0.0899911	0.195158	miR-3176
hsa-miR-3183	2.93621	1.07469	0.630797	1.57858	0.114433	0.232354	miR-3183
hsa-miR-3187-3p	18.8048	-0.44716	0.439812	-1.01686	0.309218	0.488485	miR-3187-3p
hsa-miR-3189-3p	14.5441	1.95663	0.485926	3.89749	9.71965e-05	0.00056996	miR-3189-3p
hsa-miR-3190-3p	4.13838	-0.164087	0.588309	-0.275101	0.783239	0.884613	miR-3190-3p
hsa-miR-3191-3p	2.58038	-0.814914	0.641581	-1.22031	0.222348	0.388977	miR-3191-3p
hsa-miR-3192-5p	6.27413	0.949683	0.571343	1.63937	0.101136	0.212356	miR-3192-5p
hsa-miR-3194-5p	4.87559	-0.712417	0.580293	-1.21823	0.223138	0.389396	miR-3194-5p
hsa-miR-3199	7.43349	-0.792	0.518565	-1.51994	0.128526	0.257001	miR-3199
hsa-miR-32-3p	138.051	0.909491	0.274677	3.31024	0.000932153	0.00416627	miR-32-3p
hsa-miR-32-5p	461.652	1.22425	0.249862	4.90017	9.57517e-07	8.77325e-06	miR-32-5p
hsa-miR-3200-3p	26.0001	-0.252337	0.387504	-0.651786	0.514539	0.675909	miR-3200-3p
hsa-miR-320a-3p	2691.32	-0.568834	0.193075	-2.94612	0.00321793	0.0126814	miR-320a-3p
hsa-miR-320b	23.1541	-0.351821	0.349696	-1.00614	0.314348	0.492345	miR-320b
hsa-miR-320c	5.57544	-0.548804	0.561987	-0.981978	0.32611	0.50629	miR-320c
hsa-miR-320d	5.66717	-0.632059	0.547852	-1.14111	0.253825	0.42503	miR-320d
hsa-miR-320e	2.92596	-0.515985	0.632176	-0.800857	0.423214	0.598873	miR-320e
hsa-miR-323a-3p	1.93758	-1.28309	0.635696	-2.30495	0.0211692	0.0618209	miR-323a-3p
hsa-miR-324-3p	1311.88	-0.0204232	0.137522	-0.148563	0.881898	0.932802	miR-324-3p
hsa-miR-324-5p	1630.24	0.348642	0.175673	1.98458	0.0471916	0.118871	miR-324-5p
hsa-miR-326	139.098	0.216568	0.20505	1.05588	0.291022	0.467148	miR-326
hsa-miR-328-3p	316.986	-0.926096	0.216301	-4.28007	1.86831e-05	0.000136947	miR-328-3p
hsa-miR-330-3p	144.355	-0.305921	0.202715	-1.50905	0.131285	0.261499	miR-330-3p
hsa-miR-330-5p	149.636	0.802099	0.224856	3.56671	0.000361496	0.00182743	miR-330-5p
hsa-miR-331-3p	936.991	-0.0350039	0.149225	-0.234571	0.814542	0.905709	miR-331-3p
hsa-miR-331-5p	23.252	-0.0585005	0.344648	-0.170474	0.864637	0.929295	miR-331-5p
hsa-miR-335-3p	2.66776	-0.841341	0.642267	-1.4008	0.161273	0.30546	miR-335-3p
hsa-miR-335-5p	457.882	1.57018	0.194112	8.08627	6.1518e-16	1.96055e-14	miR-335-5p
hsa-miR-337-5p	9.77644	-2.74808	0.584404	-3.83307	0.000126553	0.00073042	miR-337-5p
hsa-miR-338-3p	1484	-0.183873	0.197444	-0.931313	0.351691	0.532549	miR-338-3p
hsa-miR-339-3p	182.537	-0.0606464	0.193286	-0.313736	0.753722	0.8619	miR-339-3p
hsa-miR-339-5p	1588.31	-0.207338	0.184051	-1.12652	0.259944	0.430111	miR-339-5p
hsa-miR-33a-3p	64.1157	0.595936	0.256287	2.32626	0.0200047	0.0593662	miR-33a-3p
hsa-miR-33a-5p	491.574	0.79488	0.439706	1.8142	0.0696462	0.162582	miR-33a-5p
hsa-miR-33b-3p	4.85739	-0.0200323	0.582928	-0.0369744	0.970505	0.98257	miR-33b-3p
hsa-miR-33b-5p	48.0167	1.35384	0.370882	3.65131	0.00026091	0.00138585	miR-33b-5p
hsa-miR-340-3p	97.1641	0.654069	0.232943	2.80594	0.005017	0.0186673	miR-340-3p
hsa-miR-340-5p	1214.69	1.31446	0.184493	7.12469	1.04312e-12	2.12391e-11	miR-340-5p
hsa-miR-342-3p	2027.07	-0.172036	0.178512	-0.963675	0.335209	0.51482	miR-342-3p
hsa-miR-342-5p	46.3926	-0.204613	0.282908	-0.723259	0.469521	0.637331	miR-342-5p
hsa-miR-345-3p	29.7628	0.383701	0.315028	1.21688	0.22365	0.389396	miR-345-3p
hsa-miR-345-5p	977.728	0.704686	0.163292	4.3152	1.59455e-05	0.000118061	miR-345-5p
hsa-miR-34a-3p	309.058	0.684703	0.173362	3.94851	7.86406e-05	0.000472488	miR-34a-3p
hsa-miR-34a-5p	94701.8	0.701661	0.128628	5.45496	4.89838e-08	5.52387e-07	miR-34a-5p
hsa-miR-34b-3p	17.1292	-2.045	0.432807	-4.60136	4.1974e-06	3.41855e-05	miR-34b-3p
hsa-miR-34b-5p	22.9296	-0.817777	0.360943	-2.26079	0.023772	0.067801	miR-34b-5p
hsa-miR-34c-3p	4.48988	-1.16674	0.593544	-1.91769	0.0551497	0.135654	miR-34c-3p
hsa-miR-34c-5p	70.832	-0.644567	0.31439	-2.05062	0.0403044	0.104393	miR-34c-5p
hsa-miR-3605-3p	92.7943	-0.0738607	0.263121	-0.280935	0.77876	0.884003	miR-3605-3p
hsa-miR-3605-5p	26.2718	0.0855653	0.35442	0.243879	0.807325	0.899345	miR-3605-5p
hsa-miR-3609	178.902	-1.19548	0.27923	-4.27554	1.90672e-05	0.000138379	miR-3609
hsa-miR-361-3p	6990.86	0.274872	0.153825	1.78692	0.0739511	0.168614	miR-361-3p
hsa-miR-361-5p	5521.13	0.069952	0.130847	0.534587	0.592935	0.742486	miR-361-5p
hsa-miR-3611	61.5768	1.18389	0.288576	4.09945	4.14132e-05	0.000273477	miR-3611
hsa-miR-3613-3p	14.5633	0.656392	0.450627	1.45751	0.144977	0.279653	miR-3613-3p
hsa-miR-3613-5p	451.737	1.06268	0.292032	3.64052	0.000272083	0.00142455	miR-3613-5p
hsa-miR-3615	13.1198	-0.696138	0.433814	-1.59968	0.109669	0.224545	miR-3615
hsa-miR-362-3p	34.2134	1.30945	0.344692	3.78055	0.000156484	0.000868959	miR-362-3p
hsa-miR-362-5p	274.077	0.276208	0.156688	1.76251	0.0779827	0.175342	miR-362-5p
hsa-miR-3620-3p	3.14632	-0.870651	0.62607	-1.32908	0.183821	0.332693	miR-3620-3p
hsa-miR-363-3p	1410.46	-1.15552	0.150724	-7.66612	1.77284e-14	3.93784e-13	miR-363-3p
hsa-miR-363-5p	42.9614	-1.28716	0.310694	-4.12684	3.67777e-05	0.000245073	miR-363-5p
hsa-miR-3651	4.10388	-1.3228	0.614546	-2.03201	0.0421528	0.108234	miR-3651
hsa-miR-3657	2.65487	0.377599	0.644054	0.569554	0.56898	0.72913	miR-3657
hsa-miR-3659	1.42305	1.55882	0.609103	2.36382	0.0180874		miR-3659
hsa-miR-365a-3p	1188.97	0.0449371	0.262489	0.171238	0.864037	0.929295	miR-365a-3p
hsa-miR-365a-5p	14.6528	-0.869355	0.41221	-2.09562	0.0361155	0.0962643	miR-365a-5p
hsa-miR-365b-3p	14.1601	0.352378	0.452151	0.778755	0.436124	0.608912	miR-365b-3p
hsa-miR-365b-5p	20.0037	-0.561627	0.403386	-1.39541	0.162894	0.307735	miR-365b-5p
hsa-miR-3661	9.17894	0.100689	0.499173	0.196449	0.844259	0.923737	miR-3661
hsa-miR-3662	17.7184	1.92735	0.439304	4.26766	1.97531e-05	0.000141484	miR-3662
hsa-miR-3679-5p	34.8343	-0.45312	0.336363	-1.34741	0.177849	0.325985	miR-3679-5p
hsa-miR-3684	4.18044	0.436099	0.630154	0.714935	0.474649	0.638229	miR-3684
hsa-miR-3688-3p	5.00667	0.965918	0.588473	1.63001	0.1031	0.214087	miR-3688-3p
hsa-miR-369-3p	3.03607	-0.507098	0.63999	-0.807945	0.419122	0.596537	miR-369-3p
hsa-miR-369-5p	1.80195	-1.40313	0.634473	-2.4405	0.014667		miR-369-5p
hsa-miR-370-3p	33.1231	-3.74702	0.498436	-6.75365	1.44167e-11	2.62688e-10	miR-370-3p
hsa-miR-374a-3p	1496.09	1.41534	0.291596	4.85583	1.19883e-06	1.07164e-05	miR-374a-3p
hsa-miR-374a-5p	5477.89	1.07713	0.165267	6.51754	7.14701e-11	1.11463e-09	miR-374a-5p
hsa-miR-374b-3p	185.93	0.456127	0.254609	1.7912	0.0732617	0.167815	miR-374b-3p
hsa-miR-374b-5p	1014.83	0.179629	0.15527	1.1568	0.247353	0.417764	miR-374b-5p
hsa-miR-375-3p	5.33237	1.11273	0.575036	1.84508	0.0650256	0.153754	miR-375-3p
hsa-miR-376a-3p	10.3722	-3.14686	0.579332	-4.26622	1.98811e-05	0.000141484	miR-376a-3p
hsa-miR-376b-3p	9.2046	-1.31613	0.519105	-2.48265	0.0130409	0.0421101	miR-376b-3p
hsa-miR-376c-3p	8.775	-2.05438	0.585477	-3.27273	0.00106513	0.00470327	miR-376c-3p
hsa-miR-378a-3p	794.951	1.31076	0.137339	9.54226	1.39752e-21	6.40239e-20	miR-378a-3p
hsa-miR-378a-5p	1077.56	1.39819	0.143054	9.77242	1.47872e-22	8.15485e-21	miR-378a-5p
hsa-miR-378d	6.0192	0.95671	0.556852	1.68838	0.0913379	0.196914	miR-378d
hsa-miR-379-5p	28.2874	-3.84485	0.458765	-7.03516	1.99026e-12	3.94287e-11	miR-379-5p
hsa-miR-381-3p	7.63974	-2.82313	0.606385	-3.91496	9.0421e-05	0.000534505	miR-381-3p
hsa-miR-382-5p	21.647	-3.44528	0.472594	-6.40132	1.54044e-10	2.25828e-09	miR-382-5p
hsa-miR-3909	7.82237	0.997524	0.549156	1.77592	0.0757468	0.170838	miR-3909
hsa-miR-3912-3p	11.7244	0.649756	0.484913	1.35193	0.176399	0.325693	miR-3912-3p
hsa-miR-3913-3p	2.30077	0.366544	0.643027	0.542763	0.587293	0.738397	miR-3913-3p
hsa-miR-3913-5p	7.03367	0.629648	0.527834	1.17561	0.239749	0.409641	miR-3913-5p
hsa-miR-3928-3p	19.2648	-0.555474	0.41053	-1.35006	0.176998	0.325978	miR-3928-3p
hsa-miR-3934-3p	5.35616	-0.0184232	0.570941	-0.0260812	0.979193	0.983217	miR-3934-3p
hsa-miR-3934-5p	1.33136	-0.211509	0.634096	-0.337594	0.735669		miR-3934-5p
hsa-miR-3935	3.19992	0.0126432	0.640517	0.0287579	0.977058	0.983217	miR-3935
hsa-miR-3940-3p	56.9237	-0.706612	0.266278	-2.651	0.00802544	0.028282	miR-3940-3p
hsa-miR-3943	1.24197	-1.75716	0.589267	-2.40028	0.0163827		miR-3943
hsa-miR-409-3p	46.6827	-4.02599	0.398614	-9.10611	8.53854e-20	3.29408e-18	miR-409-3p
hsa-miR-411-5p	20.3603	-3.49919	0.484158	-6.23544	4.50508e-10	6.35043e-09	miR-411-5p
hsa-miR-421	461.973	-0.00301794	0.141804	-0.0212408	0.983054	0.984397	miR-421
hsa-miR-423-3p	1532.87	-0.155052	0.181762	-0.853038	0.393638	0.573027	miR-423-3p
hsa-miR-423-5p	3690.64	-0.405117	0.202699	-1.99841	0.0456721	0.11584	miR-423-5p
hsa-miR-424-3p	147.416	-2.27314	0.228524	-9.90996	3.76807e-23	2.5109e-21	miR-424-3p
hsa-miR-424-5p	8603.07	-1.22181	0.228026	-5.35816	8.40756e-08	8.80392e-07	miR-424-5p
hsa-miR-425-3p	927.853	0.0193348	0.124726	0.155037	0.876792	0.932802	miR-425-3p
hsa-miR-425-5p	3006.64	-0.0164554	0.179074	-0.0918928	0.926783	0.947465	miR-425-5p
hsa-miR-4289	5.09095	0.591131	0.560857	1.02243	0.306578	0.48536	miR-4289
hsa-miR-429	6.97197	0.0653547	0.541963	0.124053	0.901273	0.937415	miR-429
hsa-miR-431-5p	1.79229	-1.09542	0.620503	-2.03172	0.0421815		miR-431-5p
hsa-miR-432-5p	12.1399	-3.17053	0.542901	-4.70765	2.50595e-06	2.16101e-05	miR-432-5p
hsa-miR-4326	24.7206	0.863255	0.355794	2.41237	0.0158493	0.0497656	miR-4326
hsa-miR-4425	21.1377	0.0477343	0.414344	0.117174	0.906722	0.937415	miR-4425
hsa-miR-4428	0.834168	-0.507192	0.3527	-0.97461	0.329754		miR-4428
hsa-miR-4431	3.96713	0.556413	0.590541	0.904336	0.365817	0.543902	miR-4431
hsa-miR-4435	1.49706	-1.06305	0.635246	-1.495	0.134914		miR-4435
hsa-miR-4458	4.08139	-0.495986	0.612028	-0.829563	0.406786	0.581236	miR-4458
hsa-miR-4467	2.28536	1.12893	0.642509	1.89788	0.0577113	0.141008	miR-4467
hsa-miR-4473	3.67973	0.145355	0.616793	0.230144	0.81798	0.905709	miR-4473
hsa-miR-449a	10.1772	0.206193	0.494179	0.432167	0.66562	0.803788	miR-449a
hsa-miR-4504	2.42107	0.236291	0.644398	0.434148	0.664181	0.803374	miR-4504
hsa-miR-450a-1-3p	35.8653	-1.78855	0.328514	-5.39459	6.86811e-08	7.62777e-07	miR-450a-1-3p
hsa-miR-450a-2-3p	18.9214	-2.60542	0.452441	-5.49053	4.00719e-08	4.58948e-07	miR-450a-2-3p
hsa-miR-450a-5p	12.7011	-1.28124	0.451364	-2.80303	0.00506251	0.0187415	miR-450a-5p
hsa-miR-450b-5p	146.538	-1.08799	0.211738	-5.13516	2.81902e-07	2.79235e-06	miR-450b-5p
hsa-miR-4521	2127.18	0.622484	0.181753	3.42516	0.000614433	0.00290567	miR-4521
hsa-miR-4523	1.96909	-0.535808	0.642148	-0.928602	0.353095	0.532549	miR-4523
hsa-miR-4525	5.42938	-0.644227	0.580852	-1.0887	0.276285	0.45104	miR-4525
hsa-miR-454-3p	11063.5	0.223281	0.123214	1.81212	0.0699674	0.162813	miR-454-3p
hsa-miR-454-5p	64.9119	-0.241834	0.251176	-0.962807	0.335644	0.51482	miR-454-5p
hsa-miR-455-3p	815.606	-0.126956	0.147397	-0.86132	0.389062	0.570365	miR-455-3p
hsa-miR-455-5p	1159.17	-0.0340251	0.162814	-0.208966	0.834475	0.919805	miR-455-5p
hsa-miR-4636	7.01541	0.845132	0.538116	1.55227	0.120596	0.244129	miR-4636
hsa-miR-4640-3p	5.12226	-0.19573	0.578142	-0.337389	0.735824	0.852068	miR-4640-3p
hsa-miR-4640-5p	2.86223	-1.43713	0.641233	-2.36018	0.0182662	0.0557879	miR-4640-5p
hsa-miR-4645-3p	1.95767	1.17434	0.64207	1.67466	0.0940014	0.199142	miR-4645-3p
hsa-miR-4659a-3p	2.34711	1.21091	0.643197	1.78618	0.0740706	0.168614	miR-4659a-3p
hsa-miR-4662a-5p	55.4342	1.00268	0.304769	3.27628	0.00105185	0.00467275	miR-4662a-5p
hsa-miR-4664-3p	2.49103	0.605339	0.642045	0.988537	0.32289	0.504644	miR-4664-3p
hsa-miR-4668-5p	5.68361	-0.260088	0.575012	-0.455769	0.648556	0.789687	miR-4668-5p
hsa-miR-4676-3p	1.71994	-0.281265	0.617295	-0.546791	0.584523		miR-4676-3p
hsa-miR-4677-3p	43.1694	0.0780041	0.322171	0.244548	0.806806	0.899345	miR-4677-3p
hsa-miR-4677-5p	6.32984	1.28184	0.569085	2.20235	0.0276404	0.0770357	miR-4677-5p
hsa-miR-4685-3p	2.44418	-0.323812	0.644824	-0.476292	0.633867	0.77803	miR-4685-3p
hsa-miR-4690-3p	2.99089	0.0975306	0.644558	0.152341	0.878918	0.932802	miR-4690-3p
hsa-miR-4705	5.45033	0.404367	0.609649	0.74003	0.459282	0.629259	miR-4705
hsa-miR-4709-3p	5.50692	1.57292	0.577375	2.56857	0.0102118	0.0344941	miR-4709-3p
hsa-miR-4709-5p	2.3637	-0.338294	0.644793	-0.550587	0.581917	0.735422	miR-4709-5p
hsa-miR-4714-3p	5.20838	0.219554	0.604428	0.382019	0.702447	0.830474	miR-4714-3p
hsa-miR-4725-3p	6.64614	-0.141643	0.560856	-0.252537	0.800626	0.894602	miR-4725-3p
hsa-miR-4728-3p	3.50222	-0.359764	0.622073	-0.571189	0.567872	0.72913	miR-4728-3p
hsa-miR-4731-3p	7.02253	-1.78202	0.550449	-3.089	0.00200831	0.00836417	miR-4731-3p
hsa-miR-4731-5p	6.561	-2.082	0.549949	-3.52399	0.000425099	0.00210539	miR-4731-5p
hsa-miR-4741	2.208	-0.363255	0.644797	-0.558055	0.576807	0.734365	miR-4741
hsa-miR-4742-3p	2.12411	0.471562	0.640312	0.730174	0.465284	0.633928	miR-4742-3p
hsa-miR-4742-5p	4.28986	-0.161203	0.600806	-0.26887	0.78803	0.885929	miR-4742-5p
hsa-miR-4746-5p	18.6029	-0.163877	0.39074	-0.419897	0.674561	0.813245	miR-4746-5p
hsa-miR-4747-5p	4.83157	-0.436658	0.584158	-0.738065	0.460475	0.629717	miR-4747-5p
hsa-miR-4748	2.2871	0.405644	0.64459	0.643897	0.519642	0.681047	miR-4748
hsa-miR-4762-3p	3.05365	-0.438941	0.620293	-0.692396	0.488688	0.652475	miR-4762-3p
hsa-miR-4766-3p	12.6814	0.116606	0.466151	0.255602	0.798259	0.893318	miR-4766-3p
hsa-miR-4775	5.12962	1.41188	0.605856	2.28377	0.0223853	0.0640954	miR-4775
hsa-miR-4780	1.1624	-1.36824	0.603791	-2.16519	0.0303733		miR-4780
hsa-miR-4781-3p	6.248	0.577272	0.555153	1.04868	0.294327	0.470026	miR-4781-3p
hsa-miR-4787-3p	3.03295	0.353852	0.628095	0.55664	0.577774	0.734365	miR-4787-3p
hsa-miR-4791	5.65574	0.434625	0.551888	0.766381	0.44345	0.6133	miR-4791
hsa-miR-4799-5p	3.5312	-0.523706	0.60993	-0.85178	0.394336	0.573027	miR-4799-5p
hsa-miR-4804-3p	1.85261	0.328712	0.628797	0.621481	0.534283	0.694379	miR-4804-3p
hsa-miR-4804-5p	20.902	-0.252813	0.360288	-0.701604	0.482926	0.647139	miR-4804-5p
hsa-miR-484	35.7043	0.453302	0.377187	1.19708	0.231277	0.398955	miR-484
hsa-miR-485-3p	6.24436	-3.18819	0.600211	-4.18918	2.79967e-05	0.000192263	miR-485-3p
hsa-miR-486-5p	4.63726	-1.36642	0.585542	-2.21671	0.0266432	0.07454	miR-486-5p
hsa-miR-487b-3p	5.8202	-2.42029	0.614488	-3.31397	0.000919802	0.00413629	miR-487b-3p
hsa-miR-489-3p	1.59676	1.04384	0.613725	1.89606	0.0579523		miR-489-3p
hsa-miR-491-3p	12.4187	1.13376	0.475926	2.36891	0.0178406	0.0547161	miR-491-3p
hsa-miR-491-5p	72.5197	0.245166	0.248495	0.985715	0.324273	0.505728	miR-491-5p
hsa-miR-493-3p	7.95985	-2.91178	0.580593	-3.98562	6.73044e-05	0.000414572	miR-493-3p
hsa-miR-493-5p	2.72676	-2.01968	0.639442	-2.61875	0.00882531	0.0309519	miR-493-5p
hsa-miR-494-3p	14.1029	-0.764447	0.467612	-1.63724	0.10158	0.212356	miR-494-3p
hsa-miR-497-3p	8.43324	-0.210072	0.567697	-0.372451	0.709557	0.836183	miR-497-3p
hsa-miR-497-5p	742.803	-0.502056	0.157551	-3.18651	0.00143999	0.00617259	miR-497-5p
hsa-miR-4999-5p	10.8701	-0.373433	0.48357	-0.774333	0.438734	0.609413	miR-4999-5p
hsa-miR-499a-5p	20.0604	-0.0436436	0.373329	-0.118793	0.90544	0.937415	miR-499a-5p
hsa-miR-5000-3p	5.19869	0.239716	0.601834	0.396165	0.691983	0.823415	miR-5000-3p
hsa-miR-5001-3p	10.3113	-0.111833	0.482227	-0.231577	0.816867	0.905709	miR-5001-3p
hsa-miR-5008-5p	1.48092	0.220821	0.587987	0.379552	0.704278		miR-5008-5p
hsa-miR-500a-3p	559.956	0.336533	0.180413	1.86521	0.0621519	0.149368	miR-500a-3p
hsa-miR-500a-5p	81.4794	0.459949	0.248306	1.85104	0.0641631	0.152612	miR-500a-5p
hsa-miR-500b-3p	6.49424	-0.0678753	0.559952	-0.120836	0.903821	0.937415	miR-500b-3p
hsa-miR-500b-5p	3.02849	-0.549862	0.625014	-0.852043	0.39419	0.573027	miR-500b-5p
hsa-miR-501-3p	92.9705	-0.130345	0.227927	-0.571988	0.56733	0.72913	miR-501-3p
hsa-miR-501-5p	33.8021	-0.286888	0.339979	-0.843934	0.398707	0.574169	miR-501-5p
hsa-miR-5010-3p	3.65347	-0.0215712	0.617304	-0.0332964	0.973438	0.98276	miR-5010-3p
hsa-miR-5010-5p	3.05717	-0.100332	0.627337	-0.159574	0.873217	0.932802	miR-5010-5p
hsa-miR-502-3p	184.736	0.165833	0.178489	0.928887	0.352948	0.532549	miR-502-3p
hsa-miR-502-5p	25.4881	0.128548	0.358693	0.359546	0.719187	0.843463	miR-502-5p
hsa-miR-503-3p	52.9663	-2.51435	0.3215	-7.71723	1.18888e-14	2.81112e-13	miR-503-3p
hsa-miR-503-5p	2477.91	-2.14724	0.17814	-12.0518	1.89767e-33	2.78198e-31	miR-503-5p
hsa-miR-504-5p	3.49076	-0.637874	0.63852	-1.06736	0.28581	0.461684	miR-504-5p
hsa-miR-505-3p	430.48	0.146836	0.152524	0.962653	0.335722	0.51482	miR-505-3p
hsa-miR-505-5p	96.5856	-0.227633	0.210308	-1.08248	0.279038	0.454522	miR-505-5p
hsa-miR-506-3p	216.985	0.0975952	0.209015	0.466364	0.640955	0.781846	miR-506-3p
hsa-miR-506-5p	40.5591	0.686036	0.318138	2.14963	0.0315847	0.0860655	miR-506-5p
hsa-miR-507	160.179	0.457582	0.205459	2.22612	0.0260064	0.0736011	miR-507
hsa-miR-508-3p	8392.42	-0.108669	0.160977	-0.675044	0.499648	0.663482	miR-508-3p
hsa-miR-508-5p	593.105	-0.227804	0.200062	-1.13855	0.25489	0.42503	miR-508-5p
hsa-miR-509-3-5p	289.303	0.101386	0.160852	0.629835	0.528803	0.688477	miR-509-3-5p
hsa-miR-509-3p	1939.44	-0.287531	0.192667	-1.49225	0.135633	0.267255	miR-509-3p
hsa-miR-509-5p	427.962	0.156618	0.142836	1.09601	0.273075	0.447794	miR-509-5p
hsa-miR-5091	3.29998	0.0916223	0.624368	0.135612	0.892128	0.936136	miR-5091
hsa-miR-510-3p	77.1845	0.49412	0.229779	2.1478	0.0317298	0.0861406	miR-510-3p
hsa-miR-510-5p	475.066	0.026265	0.188755	0.138938	0.889499	0.935442	miR-510-5p
hsa-miR-513a-3p	15.5607	1.02669	0.421276	2.42396	0.0153523	0.0485053	miR-513a-3p
hsa-miR-513a-5p	1067.81	0.144209	0.193384	0.745555	0.455936	0.627019	miR-513a-5p
hsa-miR-513b-3p	50.537	0.635301	0.338115	1.87826	0.0603458	0.146469	miR-513b-3p
hsa-miR-513b-5p	1023.14	0.134142	0.158852	0.844293	0.398505	0.574169	miR-513b-5p
hsa-miR-513c-3p	15.7851	0.39322	0.400392	0.979059	0.327551	0.506529	miR-513c-3p
hsa-miR-513c-5p	4793.74	-0.059226	0.179155	-0.330584	0.740959	0.856313	miR-513c-5p
hsa-miR-514a-3p	3784.67	0.157663	0.166631	0.946122	0.344086	0.525448	miR-514a-3p
hsa-miR-514a-5p	509.903	0.456077	0.152034	2.99963	0.00270307	0.0108271	miR-514a-5p
hsa-miR-514b-3p	60.1657	0.12237	0.270525	0.451353	0.651735	0.79057	miR-514b-3p
hsa-miR-514b-5p	732.652	0.0275619	0.211554	0.130179	0.896425	0.937415	miR-514b-5p
hsa-miR-5187-5p	9.12876	-0.163584	0.498411	-0.329436	0.741826	0.856313	miR-5187-5p
hsa-miR-532-3p	1027.06	-0.15332	0.272895	-0.561652	0.574353	0.734365	miR-532-3p
hsa-miR-532-5p	7355.43	0.573719	0.129387	4.43419	9.24173e-06	7.20658e-05	miR-532-5p
hsa-miR-542-3p	1515.07	-1.27028	0.268635	-4.72847	2.26217e-06	1.97401e-05	miR-542-3p
hsa-miR-542-5p	123.758	-1.53019	0.235825	-6.47706	9.35258e-11	1.42822e-09	miR-542-5p
hsa-miR-545-3p	21.9744	0.559823	0.459661	1.22537	0.220437	0.386556	miR-545-3p
hsa-miR-545-5p	52.2909	1.53966	0.380642	4.04115	5.31899e-05	0.000337536	miR-545-5p
hsa-miR-548a-3p	113.058	1.33088	0.301305	4.41399	1.01482e-05	7.74858e-05	miR-548a-3p
hsa-miR-548a-5p	7.21376	0.744926	0.550096	1.3353	0.181777	0.33126	miR-548a-5p
hsa-miR-548ad-5p	1.77566	0.92526	0.641696	1.38301	0.166662		miR-548ad-5p
hsa-miR-548aw	7.53136	0.18559	0.52216	0.346306	0.729113	0.849665	miR-548aw
hsa-miR-548ay-3p	9.21484	-0.341547	0.514642	-0.661142	0.508521	0.672827	miR-548ay-3p
hsa-miR-548b-3p	6.32647	1.32885	0.576556	2.24354	0.0248619	0.0706347	miR-548b-3p
hsa-miR-548d-3p	2.43904	0.78392	0.642687	1.29178	0.196433	0.35033	miR-548d-3p
hsa-miR-548e-3p	19.8766	0.412833	0.374532	1.10133	0.270752	0.445831	miR-548e-3p
hsa-miR-548e-5p	33.1361	-0.087072	0.314653	-0.276399	0.782241	0.884613	miR-548e-5p
hsa-miR-548j-5p	57.58	-0.982484	0.272171	-3.60589	0.00031109	0.00160584	miR-548j-5p
hsa-miR-548k	13.9613	-0.235957	0.423731	-0.557279	0.577337	0.734365	miR-548k
hsa-miR-548l	2.41947	-0.549852	0.642685	-0.795983	0.426042	0.600564	miR-548l
hsa-miR-548n	14.701	0.787595	0.478088	1.64914	0.0991186	0.209377	miR-548n
hsa-miR-548o-3p	4.19923	0.437589	0.604236	0.731337	0.464573	0.633928	miR-548o-3p
hsa-miR-548u	3.23865	0.239061	0.638269	0.414017	0.678862	0.817087	miR-548u
hsa-miR-549a-3p	2.28443	0.774906	0.638403	1.63673	0.101687	0.212356	miR-549a-3p
hsa-miR-550a-3p	2.61922	0.660451	0.639453	1.03787	0.29933	0.475942	miR-550a-3p
hsa-miR-550a-5p	3.49779	0.31258	0.628127	0.509141	0.610653	0.756096	miR-550a-5p
hsa-miR-551b-3p	15.0954	1.11213	0.456977	2.42856	0.0151589	0.0481017	miR-551b-3p
hsa-miR-561-3p	56.9858	-0.508342	0.289606	-1.75691	0.0789334	0.176905	miR-561-3p
hsa-miR-561-5p	461.608	-0.449462	0.204474	-2.19836	0.0279236	0.0775304	miR-561-5p
hsa-miR-5690	6.68843	0.0828567	0.573808	0.149131	0.881451	0.932802	miR-5690
hsa-miR-5695	2.7886	0.107357	0.643989	0.196746	0.844026	0.923737	miR-5695
hsa-miR-5696	2.80516	0.847773	0.640427	1.4221	0.154997	0.294333	miR-5696
hsa-miR-5697	5.61436	0.291102	0.564917	0.514885	0.606633	0.753665	miR-5697
hsa-miR-5699-3p	98.2477	0.802412	0.225605	3.55508	0.000377868	0.00189711	miR-5699-3p
hsa-miR-5699-5p	110.324	0.935355	0.222863	4.19427	2.73746e-05	0.000191101	miR-5699-5p
hsa-miR-570-3p	36.1097	0.930804	0.358667	2.59747	0.00939139	0.032321	miR-570-3p
hsa-miR-573	6.23582	1.58721	0.58543	2.59753	0.0093897	0.032321	miR-573
hsa-miR-574-3p	4267.29	-1.80649	0.185032	-9.76184	1.64152e-22	8.15485e-21	miR-574-3p
hsa-miR-574-5p	27.3099	-1.96673	0.381091	-5.08243	3.72642e-07	3.64195e-06	miR-574-5p
hsa-miR-576-5p	108.314	0.0387527	0.221592	0.175092	0.861007	0.929295	miR-576-5p
hsa-miR-577	239.441	-0.343659	0.257663	-1.33424	0.182125	0.33126	miR-577
hsa-miR-579-3p	6.33162	0.80155	0.582805	1.3662	0.171876	0.318951	miR-579-3p
hsa-miR-579-5p	4.73643	0.469554	0.597407	0.804547	0.421081	0.598068	miR-579-5p
hsa-miR-580-3p	8.58996	0.785053	0.545878	1.46655	0.142499	0.27647	miR-580-3p
hsa-miR-582-3p	316.238	0.119695	0.161481	0.741301	0.458511	0.629259	miR-582-3p
hsa-miR-582-5p	271.167	0.357786	0.198576	1.80178	0.0715798	0.165514	miR-582-5p
hsa-miR-584-3p	53.051	-0.958098	0.2793	-3.42939	0.000604935	0.00287933	miR-584-3p
hsa-miR-584-5p	2407.16	-0.800574	0.171701	-4.66293	3.11741e-06	2.62651e-05	miR-584-5p
hsa-miR-589-3p	101.109	-0.0696564	0.22106	-0.315343	0.752502	0.86185	miR-589-3p
hsa-miR-589-5p	165.213	-0.32967	0.170769	-1.93041	0.0535564	0.132625	miR-589-5p
hsa-miR-590-3p	2512.64	1.13141	0.202441	5.58931	2.27979e-08	2.65252e-07	miR-590-3p
hsa-miR-590-5p	410.258	0.936519	0.270012	3.46979	0.000520865	0.00252844	miR-590-5p
hsa-miR-597-3p	6.99566	-0.57427	0.538123	-1.06704	0.285954	0.461684	miR-597-3p
hsa-miR-597-5p	3.78033	0.624964	0.63028	1.01093	0.312051	0.490844	miR-597-5p
hsa-miR-598-3p	668.082	0.311747	0.173601	1.79598	0.0724971	0.166584	miR-598-3p
hsa-miR-599	2.63322	1.38569	0.642295	2.00017	0.0454815	0.115757	miR-599
hsa-miR-615-3p	2051.42	-0.594424	0.143452	-4.1435	3.42038e-05	0.000230013	miR-615-3p
hsa-miR-615-5p	26.1693	-1.24911	0.396424	-3.12518	0.00177695	0.00748564	miR-615-5p
hsa-miR-616-3p	3.36911	-0.0720014	0.610995	-0.11812	0.905973	0.937415	miR-616-3p
hsa-miR-616-5p	8.65297	1.13858	0.51278	2.19659	0.0280496	0.0775863	miR-616-5p
hsa-miR-624-3p	6.24998	1.07141	0.595289	1.85831	0.0631247	0.150718	miR-624-3p
hsa-miR-624-5p	34.3013	0.248676	0.346584	0.71883	0.472245	0.638229	miR-624-5p
hsa-miR-625-3p	10.3604	-0.442062	0.486519	-0.906141	0.364861	0.543902	miR-625-3p
hsa-miR-625-5p	14.3896	-0.0783895	0.435305	-0.179805	0.857306	0.929295	miR-625-5p
hsa-miR-627-3p	12.0349	0.428482	0.474801	0.907781	0.363994	0.543902	miR-627-3p
hsa-miR-627-5p	104.294	0.363988	0.244473	1.48844	0.136635	0.267789	miR-627-5p
hsa-miR-628-3p	156.845	0.237709	0.224993	1.05626	0.290849	0.467148	miR-628-3p
hsa-miR-628-5p	99.4002	-0.0135447	0.226218	-0.0601492	0.952037	0.966542	miR-628-5p
hsa-miR-629-3p	19.9655	-0.373938	0.413209	-0.909644	0.36301	0.543902	miR-629-3p
hsa-miR-629-5p	1184.99	-0.49379	0.151206	-3.2658	0.00109157	0.00479113	miR-629-5p
hsa-miR-636	4.22817	-0.237128	0.589662	-0.399403	0.689596	0.823247	miR-636
hsa-miR-641	29.5143	0.0654244	0.32819	0.201304	0.840461	0.923737	miR-641
hsa-miR-642a-3p	9.53557	-0.181708	0.5081	-0.356367	0.721565	0.8449	miR-642a-3p
hsa-miR-642a-5p	127.007	0.243371	0.278896	0.871154	0.38367	0.563587	miR-642a-5p
hsa-miR-643	11.6734	0.563122	0.470952	1.19697	0.231318	0.398955	miR-643
hsa-miR-6505-5p	5.873	0.286995	0.548707	0.517483	0.604819	0.752687	miR-6505-5p
hsa-miR-6507-3p	1.4784	0.600117	0.623534	1.11925	0.263034		miR-6507-3p
hsa-miR-6507-5p	17.2471	0.581071	0.400587	1.43689	0.150749	0.288509	miR-6507-5p
hsa-miR-651-5p	41.6059	0.371066	0.299406	1.24271	0.213976	0.37703	miR-651-5p
hsa-miR-6511b-3p	8.03608	-0.40982	0.513495	-0.795972	0.426048	0.600564	miR-6511b-3p
hsa-miR-6513-3p	23.7247	-0.264349	0.368113	-0.718402	0.472509	0.638229	miR-6513-3p
hsa-miR-6513-5p	3.78309	0.547196	0.605678	0.891499	0.372661	0.55184	miR-6513-5p
hsa-miR-6514-3p	3.70691	-0.341517	0.606844	-0.546255	0.584891	0.737909	miR-6514-3p
hsa-miR-6514-5p	8.92907	-0.343952	0.504733	-0.6786	0.497391	0.661684	miR-6514-5p
hsa-miR-6516-3p	10.1718	0.0989318	0.506248	0.192684	0.847206	0.923737	miR-6516-3p
hsa-miR-6516-5p	2.23407	-0.486272	0.643406	-0.714424	0.474965	0.638229	miR-6516-5p
hsa-miR-652-3p	104.167	0.0329457	0.244928	0.134871	0.892714	0.936136	miR-652-3p
hsa-miR-652-5p	16.5854	0.366427	0.451295	0.820678	0.41183	0.587298	miR-652-5p
hsa-miR-653-3p	1.74514	1.11631	0.623995	2.08234	0.0373118		miR-653-3p
hsa-miR-654-3p	15.0853	-4.32248	0.556714	-5.98669	2.14149e-09	2.90688e-08	miR-654-3p
hsa-miR-659-5p	3.46016	1.07701	0.622708	1.7385	0.0821219	0.181859	miR-659-5p
hsa-miR-660-3p	12.238	0.608586	0.488808	1.25023	0.211214	0.373961	miR-660-3p
hsa-miR-660-5p	3669.52	0.722478	0.137102	5.26963	1.36698e-07	1.39166e-06	miR-660-5p
hsa-miR-663a	2.72285	0.21898	0.63027	0.339744	0.73405	0.852068	miR-663a
hsa-miR-664a-3p	30.4607	0.436348	0.432663	1.01252	0.311289	0.490698	miR-664a-3p
hsa-miR-664a-5p	160.191	-0.0890574	0.19767	-0.450805	0.65213	0.79057	miR-664a-5p
hsa-miR-664b-3p	4.88712	-0.339988	0.576137	-0.587229	0.55705	0.720137	miR-664b-3p
hsa-miR-664b-5p	18.605	-0.719799	0.397846	-1.80239	0.0714844	0.165514	miR-664b-5p
hsa-miR-670-3p	1.96097	1.95115	0.635781	2.94138	0.00326749	0.0127397	miR-670-3p
hsa-miR-671-3p	50.6591	-0.510852	0.383505	-1.33212	0.182822	0.331705	miR-671-3p
hsa-miR-671-5p	625.797	-0.117273	0.183663	-0.638491	0.523154	0.683551	miR-671-5p
hsa-miR-6716-3p	8.87108	-0.721842	0.553747	-1.30635	0.191432	0.343921	miR-6716-3p
hsa-miR-6720-3p	18.4825	-0.439026	0.376135	-1.16357	0.244599	0.415837	miR-6720-3p
hsa-miR-6720-5p	3.6541	0.865322	0.607617	1.34721	0.177912	0.325985	miR-6720-5p
hsa-miR-6726-3p	4.82248	0.330352	0.570071	0.570986	0.568009	0.72913	miR-6726-3p
hsa-miR-6731-3p	5.7091	0.174978	0.558334	0.316223	0.751833	0.86185	miR-6731-3p
hsa-miR-6731-5p	8.54128	0.374153	0.516117	0.713709	0.475407	0.638229	miR-6731-5p
hsa-miR-6733-3p	3.22937	-1.84062	0.642079	-3.19451	0.0014007	0.00606696	miR-6733-3p
hsa-miR-6733-5p	3.25559	-1.03697	0.637396	-1.61757	0.105755	0.218363	miR-6733-5p
hsa-miR-6734-3p	2.64023	0.122455	0.639839	0.19628	0.844391	0.923737	miR-6734-3p
hsa-miR-6734-5p	8.82239	-0.250515	0.522388	-0.48047	0.630893	0.775914	miR-6734-5p
hsa-miR-6739-3p	1.26945	0.195838	0.601843	0.246088	0.805614		miR-6739-3p
hsa-miR-6747-3p	8.7582	-0.616343	0.524625	-1.16239	0.245077	0.415837	miR-6747-3p
hsa-miR-6750-5p	4.53555	-0.243826	0.61561	-0.39084	0.695915	0.826752	miR-6750-5p
hsa-miR-676-3p	8.10247	0.576465	0.546072	1.05183	0.292877	0.468731	miR-676-3p
hsa-miR-6764-5p	3.23289	0.119345	0.63015	0.180813	0.856514	0.929295	miR-6764-5p
hsa-miR-6767-5p	2.49431	1.0973	0.642469	1.67765	0.0934149	0.198473	miR-6767-5p
hsa-miR-6769b-3p	7.7341	0.0668339	0.523477	0.126162	0.899603	0.937415	miR-6769b-3p
hsa-miR-6772-3p	2.58761	-0.110009	0.643362	-0.171583	0.863765	0.929295	miR-6772-3p
hsa-miR-6775-3p	1.48654	0.628385	0.629767	0.813691	0.415822		miR-6775-3p
hsa-miR-6777-5p	1.99675	-0.0153728	0.641746	-0.0316951	0.974715	0.98276	miR-6777-5p
hsa-miR-6779-5p	1.73539	-0.928427	0.628168	-1.39785	0.162158		miR-6779-5p
hsa-miR-6782-3p	1.53892	-0.632725	0.620388	-1.23508	0.216802		miR-6782-3p
hsa-miR-6783-3p	1.38318	-0.572167	0.630558	-0.907723	0.364025		miR-6783-3p
hsa-miR-6786-3p	3.63185	0.0727378	0.601017	0.109628	0.912704	0.940946	miR-6786-3p
hsa-miR-6787-3p	2.64096	-1.07675	0.641359	-1.58712	0.112485	0.22967	miR-6787-3p
hsa-miR-6802-3p	3.24494	-0.338356	0.612382	-0.538634	0.59014	0.740706	miR-6802-3p
hsa-miR-6803-3p	7.48114	-0.880288	0.569712	-1.55101	0.120899	0.244129	miR-6803-3p
hsa-miR-6808-3p	1.94155	-0.60786	0.642482	-0.896403	0.370037	0.549063	miR-6808-3p
hsa-miR-6812-3p	2.54053	-0.257248	0.644584	-0.400648	0.688679	0.823247	miR-6812-3p
hsa-miR-6821-5p	2.47929	0.187658	0.644628	0.319294	0.749504	0.86185	miR-6821-5p
hsa-miR-6823-5p	9.30884	1.25813	0.556771	2.28577	0.022268	0.0640096	miR-6823-5p
hsa-miR-6825-5p	2.78098	-0.263391	0.639367	-0.411105	0.680995	0.818311	miR-6825-5p
hsa-miR-6832-5p	1.00739	-0.793825	0.578191	-1.49911	0.133846		miR-6832-5p
hsa-miR-6844	3.09588	1.06642	0.640803	1.64491	0.0999893	0.21061	miR-6844
hsa-miR-6850-5p	1.47112	-0.477361	0.607056	-0.957777	0.338175		miR-6850-5p
hsa-miR-6851-5p	3.12983	-0.337437	0.633044	-0.523799	0.600418	0.74848	miR-6851-5p
hsa-miR-6852-5p	2.38701	0.43003	0.643628	0.642869	0.520309	0.681047	miR-6852-5p
hsa-miR-6868-3p	5.73876	0.528435	0.595082	0.876783	0.380605	0.560207	miR-6868-3p
hsa-miR-6869-5p	2.05071	0.795146	0.64038	1.48957	0.136338	0.267789	miR-6869-5p
hsa-miR-6873-3p	2.46923	0.0723484	0.640496	0.124308	0.901072	0.937415	miR-6873-3p
hsa-miR-6882-5p	4.40668	0.663084	0.610187	1.05538	0.29125	0.467148	miR-6882-5p
hsa-miR-6885-3p	2.82519	0.53216	0.633444	0.803251	0.42183	0.598068	miR-6885-3p
hsa-miR-6892-5p	7.00039	0.199139	0.557491	0.363647	0.716122	0.842564	miR-6892-5p
hsa-miR-6894-5p	1.76135	-0.385381	0.639278	-0.676116	0.498967		miR-6894-5p
hsa-miR-7-1-3p	121.276	0.656257	0.213818	3.06779	0.00215648	0.00883074	miR-7-1-3p
hsa-miR-7-2-3p	3.52894	0.12021	0.633238	0.194754	0.845585	0.923737	miR-7-2-3p
hsa-miR-7-5p	2453.46	0.481091	0.191535	2.51234	0.0119932	0.0395993	miR-7-5p
hsa-miR-708-3p	6.13333	-1.52849	0.598506	-2.44475	0.0144951	0.0461952	miR-708-3p
hsa-miR-708-5p	63.5038	-2.61162	0.323623	-7.92838	2.22028e-15	6.50985e-14	miR-708-5p
hsa-miR-7114-5p	1.31956	-0.568968	0.611588	-0.819256	0.41264		miR-7114-5p
hsa-miR-744-3p	9.60158	-0.178038	0.519835	-0.342578	0.731916	0.851578	miR-744-3p
hsa-miR-744-5p	794.057	-0.534344	0.22709	-2.35264	0.0186407	0.0562782	miR-744-5p
hsa-miR-760	72.9817	-0.831176	0.30318	-2.73959	0.00615158	0.0222124	miR-760
hsa-miR-765	8.30067	-0.0992212	0.517039	-0.192049	0.847704	0.923737	miR-765
hsa-miR-766-3p	6.56443	0.159249	0.606406	0.277455	0.78143	0.884613	miR-766-3p
hsa-miR-766-5p	9.34815	0.148256	0.514496	0.294186	0.768615	0.876198	miR-766-5p
hsa-miR-769-3p	69.3358	-0.168849	0.256328	-0.658861	0.509985	0.673548	miR-769-3p
hsa-miR-769-5p	421.923	-0.0636185	0.167664	-0.379424	0.704373	0.83141	miR-769-5p
hsa-miR-7706	27.5748	-1.09559	0.385436	-2.8417	0.00448737	0.0170427	miR-7706
hsa-miR-7851-3p	3.92314	0.0317134	0.629913	0.0619708	0.950586	0.966407	miR-7851-3p
hsa-miR-7974	4.94885	0.520794	0.618055	0.952354	0.340918	0.521696	miR-7974
hsa-miR-7976	84.8859	0.247898	0.245506	1.00916	0.3129	0.491126	miR-7976
hsa-miR-7977	12.2511	-0.816351	0.455845	-1.78307	0.0745751	0.168715	miR-7977
hsa-miR-802	5.67679	1.36074	0.565432	2.28623	0.0222406	0.0640096	miR-802
hsa-miR-873-3p	53.6683	0.158312	0.315622	0.503776	0.614419	0.758979	miR-873-3p
hsa-miR-873-5p	211.052	0.927381	0.211108	4.39521	1.10666e-05	8.36269e-05	miR-873-5p
hsa-miR-874-3p	86.7537	-1.90643	0.244318	-7.77171	7.74332e-15	1.89195e-13	miR-874-3p
hsa-miR-874-5p	21.4634	-1.7973	0.39193	-4.51475	6.3392e-06	5.03477e-05	miR-874-5p
hsa-miR-876-3p	4.71133	0.522503	0.624543	0.882693	0.377402	0.556644	miR-876-3p
hsa-miR-876-5p	12.5211	0.624828	0.496399	1.2828	0.199563	0.355048	miR-876-5p
hsa-miR-877-3p	3.35084	0.194802	0.626481	0.310561	0.756134	0.863312	miR-877-3p
hsa-miR-877-5p	188.993	-0.459821	0.211988	-2.16894	0.0300875	0.0825997	miR-877-5p
hsa-miR-887-3p	307.082	0.462606	0.185639	2.49144	0.0127228	0.0414481	miR-887-3p
hsa-miR-887-5p	20.9678	0.491718	0.384317	1.26975	0.204175	0.362373	miR-887-5p
hsa-miR-888-5p	18.6997	-0.0600856	0.644653	-0.0970854	0.922659	0.944565	miR-888-5p
hsa-miR-891a-5p	25.7311	-0.943595	0.644411	-1.61096	0.107188	0.220081	miR-891a-5p
hsa-miR-891b	5.61551	0.533232	0.636876	0.92072	0.357196	0.536527	miR-891b
hsa-miR-892a	13.7514	-0.138744	0.63189	-0.232382	0.816242	0.905709	miR-892a
hsa-miR-892b	5.70843	0.104399	0.611706	0.173971	0.861888	0.929295	miR-892b
hsa-miR-9-3p	13.4101	1.2565	0.446517	2.78237	0.00539638	0.0196793	miR-9-3p
hsa-miR-9-5p	214.633	1.55201	0.187383	8.27343	1.30157e-16	4.5431e-15	miR-9-5p
hsa-miR-92a-1-5p	7.9811	0.930583	0.532832	1.73048	0.0835439	0.184451	miR-92a-1-5p
hsa-miR-92a-2-5p	3.94189	-0.400409	0.625708	-0.654656	0.512689	0.674688	miR-92a-2-5p
hsa-miR-92a-3p	5216.92	0.0470217	0.173641	0.27078	0.78656	0.885636	miR-92a-3p
hsa-miR-92b-3p	163.736	-0.0382507	0.232856	-0.164387	0.869427	0.93171	miR-92b-3p
hsa-miR-92b-5p	84.9635	-0.765653	0.248298	-3.08188	0.00205697	0.00851843	miR-92b-5p
hsa-miR-93-3p	205.792	0.151931	0.194055	0.782643	0.433837	0.608039	miR-93-3p
hsa-miR-93-5p	129808	0.352192	0.136734	2.57574	0.0100027	0.034222	miR-93-5p
hsa-miR-933	4.93773	0.129287	0.602396	0.223253	0.823339	0.910267	miR-933
hsa-miR-937-3p	12.7701	-0.525856	0.477782	-1.10014	0.27127	0.445831	miR-937-3p
hsa-miR-937-5p	1.89266	1.08099	0.630299	2.08381	0.0371774	0.0980252	miR-937-5p
hsa-miR-939-5p	2.42903	0.286732	0.64385	0.450269	0.652517	0.79057	miR-939-5p
hsa-miR-940	2.85214	0.217895	0.637134	0.338353	0.735097	0.852068	miR-940
hsa-miR-941	65.8879	-0.733311	0.299318	-2.44718	0.0143979	0.0460857	miR-941
hsa-miR-942-5p	162.858	0.152521	0.199645	0.763492	0.44517	0.614519	miR-942-5p
hsa-miR-943	5.02173	2.03659	0.601685	3.04146	0.00235431	0.00958729	miR-943
hsa-miR-95-3p	14.1403	0.849753	0.437945	1.94617	0.0516343	0.128735	miR-95-3p
hsa-miR-96-5p	2.49051	-0.506082	0.643419	-0.852331	0.394031	0.573027	miR-96-5p
hsa-miR-98-3p	112.431	0.06965	0.256733	0.271932	0.785674	0.885636	miR-98-3p
hsa-miR-98-5p	3512.98	0.021705	0.184095	0.117905	0.906143	0.937415	miR-98-5p
hsa-miR-9903	9.01826	-1.13896	0.524987	-2.15356	0.0312747	0.0855387	miR-9903
hsa-miR-9985	29.8267	-1.66764	0.35128	-4.70009	2.60047e-06	2.21645e-05	miR-9985
hsa-miR-99a-3p	55.0666	-0.228429	0.27166	-0.84068	0.400527	0.574533	miR-99a-3p
hsa-miR-99a-5p	494.839	-0.795316	0.198083	-4.01447	5.95796e-05	0.0003701	miR-99a-5p
hsa-miR-99b-3p	1654.69	-0.0963238	0.115478	-0.834143	0.404201	0.57867	miR-99b-3p
hsa-miR-99b-5p	31488.6	-0.449213	0.119427	-3.7614	0.000168966	0.000924271	miR-99b-5p

## Sheet: miR +TPA vs +TPADox
id	baseMean	log2FoldChange	lfcSE	stat	pvalue	padj	gene_name
hsa-let-7a-2-3p	60.1212	-1.04505	0.322188	-3.28741	0.00101112	0.0142568	let-7a-2-3p
hsa-let-7a-3p	442.214	0.299867	0.214346	1.399	0.161813	0.46834	let-7a-3p
hsa-let-7a-5p	83333.4	-0.10512	0.154594	-0.679992	0.496509	0.792541	let-7a-5p
hsa-let-7b-3p	106.089	0.309097	0.229414	1.3464	0.178172	0.499118	let-7b-3p
hsa-let-7b-5p	45409.6	0.0155271	0.149969	0.103533	0.91754	0.982581	let-7b-5p
hsa-let-7c-3p	37.0709	0.34531	0.352798	0.97871	0.327723	0.678475	let-7c-3p
hsa-let-7c-5p	4550.39	0.323979	0.171603	1.88812	0.0590093	0.260168	let-7c-5p
hsa-let-7d-3p	1366.28	0.188689	0.157118	1.20085	0.229809	0.552325	let-7d-3p
hsa-let-7d-5p	9542.31	0.0905126	0.139827	0.647319	0.517426	0.810634	let-7d-5p
hsa-let-7e-3p	78.0039	-0.301495	0.246032	-1.22707	0.219794	0.543702	let-7e-3p
hsa-let-7e-5p	67956.1	0.0617522	0.13271	0.465318	0.641703	0.861564	let-7e-5p
hsa-let-7f-1-3p	135.644	0.412328	0.223087	1.84828	0.0645613	0.272264	let-7f-1-3p
hsa-let-7f-2-3p	150.126	-0.183361	0.267056	-0.685846	0.49281	0.791256	let-7f-2-3p
hsa-let-7f-5p	152107	0.11595	0.169157	0.685458	0.493055	0.791256	let-7f-5p
hsa-let-7g-3p	81.08	-0.107726	0.221132	-0.484808	0.627812	0.850017	let-7g-3p
hsa-let-7g-5p	56452.4	0.0793516	0.130435	0.608358	0.54295	0.828539	let-7g-5p
hsa-let-7i-3p	2150.56	-0.127851	0.180005	-0.710026	0.477688	0.791256	let-7i-3p
hsa-let-7i-5p	640959	-0.0384964	0.183883	-0.209333	0.834188	0.966744	let-7i-5p
hsa-miR-1-3p	34.7214	-0.971789	0.62129	-1.70895	0.087461	0.321704	miR-1-3p
hsa-miR-100-3p	964.303	-1.67247	0.433689	-3.9119	9.1573e-05	0.0020387	miR-100-3p
hsa-miR-100-5p	8925.78	-1.58839	0.185635	-8.55879	1.14053e-17	9.64892e-16	miR-100-5p
hsa-miR-101-2-5p	9.13263	-0.271858	0.459794	-0.574385	0.565707		miR-101-2-5p
hsa-miR-101-3p	14006.3	-0.0715557	0.189455	-0.377587	0.705737	0.885378	miR-101-3p
hsa-miR-101-5p	18.9185	-0.0413035	0.362904	-0.104931	0.916431	0.982581	miR-101-5p
hsa-miR-10393-3p	1.48569	0.0671828	0.62543	0.108161	0.913868		miR-10393-3p
hsa-miR-10395-3p	17.6337	0.0756903	0.464348	0.162515	0.8709	0.972008	miR-10395-3p
hsa-miR-10395-5p	92.7852	0.191048	0.296745	0.643094	0.520163	0.811915	miR-10395-5p
hsa-miR-10397-5p	3.07511	-0.765338	0.617313	-1.20279	0.229059		miR-10397-5p
hsa-miR-10399-3p	3.53256	-0.150902	0.603952	-0.236926	0.812714		miR-10399-3p
hsa-miR-10399-5p	6.38645	0.278945	0.550376	0.50389	0.614339		miR-10399-5p
hsa-miR-103a-1-5p	4.58138	-0.635693	0.579748	-1.11282	0.265787		miR-103a-1-5p
hsa-miR-103a-2-5p	12.174	-0.563169	0.433947	-1.28868	0.197508		miR-103a-2-5p
hsa-miR-103a-3p	28846.1	0.0242166	0.131385	0.184319	0.853763	0.96734	miR-103a-3p
hsa-miR-10523-5p	4.87185	-0.302061	0.573506	-0.500849	0.616478		miR-10523-5p
hsa-miR-10526-3p	3.17469	-0.609718	0.641516	-1.5424	0.122976		miR-10526-3p
hsa-miR-106a-3p	206.021	0.102592	0.179677	0.568471	0.569715	0.832945	miR-106a-3p
hsa-miR-106a-5p	12.8265	-0.0582302	0.481776	-0.140469	0.88829		miR-106a-5p
hsa-miR-106b-3p	597.06	0.110504	0.149187	0.740792	0.45882	0.790144	miR-106b-3p
hsa-miR-106b-5p	312.806	0.0972029	0.169668	0.573361	0.566401	0.832945	miR-106b-5p
hsa-miR-107	3381.7	0.0661461	0.160026	0.413377	0.67933	0.881462	miR-107
hsa-miR-10a-3p	544.52	0.405509	0.14149	2.86598	0.00415725	0.0428907	miR-10a-3p
hsa-miR-10a-5p	6424.87	0.188338	0.127484	1.47734	0.139585	0.434149	miR-10a-5p
hsa-miR-10b-3p	742.117	0.409522	0.130533	3.13729	0.00170518	0.0222052	miR-10b-3p
hsa-miR-10b-5p	9970.28	0.265832	0.147217	1.80567	0.0709705	0.294319	miR-10b-5p
hsa-miR-1179	5.63435	-0.358606	0.600914	-0.606883	0.543929		miR-1179
hsa-miR-1180-3p	78.3002	0.0417577	0.251379	0.166179	0.868016	0.971352	miR-1180-3p
hsa-miR-1185-1-3p	2.72693	0	0.629831	0	1		miR-1185-1-3p
hsa-miR-12114	4.05596	-0.0633267	0.63617	-0.12268	0.902361		miR-12114
hsa-miR-12135	3.74382	0.269038	0.621193	0.41719	0.676539		miR-12135
hsa-miR-12136	20.6993	0.102116	0.455319	0.200149	0.841364	0.96734	miR-12136
hsa-miR-122-5p	48.7511	0.445818	0.28622	1.555	0.119945	0.390283	miR-122-5p
hsa-miR-1226-3p	82.1529	-0.122447	0.260344	-0.472537	0.636544	0.857509	miR-1226-3p
hsa-miR-1227-3p	3.7979	0.236684	0.629882	0.37758	0.705743		miR-1227-3p
hsa-miR-1228-3p	4.89723	-0.359071	0.59485	-0.64206	0.520834		miR-1228-3p
hsa-miR-1228-5p	3.85584	-0.608718	0.633464	-1.10409	0.269554		miR-1228-5p
hsa-miR-1229-3p	10.2932	-0.605404	0.513951	-1.20071	0.229863		miR-1229-3p
hsa-miR-1237-3p	4.26452	0.23932	0.619932	0.387578	0.698329		miR-1237-3p
hsa-miR-1248	2647.23	-0.0459076	0.423942	-0.108584	0.913533	0.982581	miR-1248
hsa-miR-1249-3p	35.7542	-0.68309	0.331444	-2.05327	0.0400459	0.214423	miR-1249-3p
hsa-miR-1250-5p	4.7532	-0.339547	0.572534	-0.598664	0.549397		miR-1250-5p
hsa-miR-1252-5p	2.16708	-1.10249	0.638849	-2.19283	0.0283197		miR-1252-5p
hsa-miR-1255a	5.68913	-0.486342	0.573887	-0.821562	0.411326		miR-1255a
hsa-miR-125a-3p	288.45	0.124931	0.153472	0.813871	0.415719	0.748554	miR-125a-3p
hsa-miR-125a-5p	122029	0.230133	0.199402	1.15418	0.248428	0.580581	miR-125a-5p
hsa-miR-125b-1-3p	47.7319	-1.84961	0.349461	-5.25743	1.46079e-07	5.6174e-06	miR-125b-1-3p
hsa-miR-125b-2-3p	6.79351	-0.0532822	0.547042	-0.091403	0.927172		miR-125b-2-3p
hsa-miR-125b-5p	73209.9	-1.05236	0.153215	-6.86934	6.44984e-12	3.89755e-10	miR-125b-5p
hsa-miR-126-3p	12731.3	0.437905	0.165398	2.6476	0.00810658	0.0714393	miR-126-3p
hsa-miR-126-5p	2465.75	0.332915	0.171699	1.93888	0.052516	0.238863	miR-126-5p
hsa-miR-1262	59.4573	-0.0719574	0.295506	-0.249874	0.802684	0.95108	miR-1262
hsa-miR-1264	2.38787	-0.0755783	0.643038	-0.0948029	0.924471		miR-1264
hsa-miR-1269a	3.17529	0.123975	0.644337	0.183025	0.854778		miR-1269a
hsa-miR-127-3p	46.1429	0.784104	0.484863	1.73859	0.0821076	0.312116	miR-127-3p
hsa-miR-127-5p	1.86094	-0.121724	0.635051	-0.354872	0.722686		miR-127-5p
hsa-miR-1271-5p	168.212	-0.154817	0.234546	-0.659651	0.509478	0.80589	miR-1271-5p
hsa-miR-1275	3.13397	0.430145	0.636526	0.701321	0.483103		miR-1275
hsa-miR-1276	2.29364	0.144813	0.643292	0.225607	0.821507		miR-1276
hsa-miR-1277-3p	91.5654	-0.265745	0.490385	-0.536086	0.591899	0.834156	miR-1277-3p
hsa-miR-1277-5p	16.4507	-0.233061	0.405705	-0.57513	0.565203	0.832945	miR-1277-5p
hsa-miR-1278	17.6447	-0.00100321	0.398409	-0.00627816	0.994991	0.99873	miR-1278
hsa-miR-128-1-5p	33.0187	0.117051	0.311802	0.375483	0.707302	0.885378	miR-128-1-5p
hsa-miR-128-3p	11784.6	0.112703	0.123437	0.913041	0.361221	0.707391	miR-128-3p
hsa-miR-1286	3.55321	0.15097	0.597181	0.252517	0.800641		miR-1286
hsa-miR-1287-5p	77.3971	-0.0345653	0.275934	-0.134241	0.893212	0.976302	miR-1287-5p
hsa-miR-129-1-3p	11.2397	-0.137196	0.560014	-0.308086	0.758017		miR-129-1-3p
hsa-miR-129-2-3p	4.66053	0.0259541	0.568116	0.0593464	0.952676		miR-129-2-3p
hsa-miR-129-5p	123.577	0.268857	0.221498	1.21275	0.225225	0.547875	miR-129-5p
hsa-miR-1291	1287.3	0.240005	0.275927	0.870119	0.384235	0.725587	miR-1291
hsa-miR-1292-5p	48.8144	0.35125	0.27302	1.28646	0.198282	0.527504	miR-1292-5p
hsa-miR-1294	5.35022	-0.0460988	0.56584	-0.0936814	0.925362		miR-1294
hsa-miR-1296-5p	170.322	-0.0319973	0.253373	-0.127008	0.898934	0.980024	miR-1296-5p
hsa-miR-1297	4.00019	0.245513	0.590726	0.416294	0.677195		miR-1297
hsa-miR-1298-5p	1.58538	0.119683	0.438924	0.162004	0.871303		miR-1298-5p
hsa-miR-1301-3p	798.902	0.0856573	0.172782	0.495766	0.620059	0.846081	miR-1301-3p
hsa-miR-1304-5p	1.99379	0.670058	0.642529	1.15529	0.247971		miR-1304-5p
hsa-miR-1305	5.33804	-0.708463	0.609656	-1.1612	0.24556		miR-1305
hsa-miR-1306-3p	3.33963	0.316105	0.613167	0.508691	0.610969		miR-1306-3p
hsa-miR-1306-5p	106.599	0.673862	0.341573	1.97657	0.0480907	0.231329	miR-1306-5p
hsa-miR-1307-3p	1034.02	-0.0568213	0.179246	-0.317086	0.751178	0.922339	miR-1307-3p
hsa-miR-1307-5p	396.507	-0.411991	0.209312	-1.96641	0.0492517	0.231483	miR-1307-5p
hsa-miR-130a-3p	34557.1	0.422109	0.176606	2.39023	0.0168376	0.11602	miR-130a-3p
hsa-miR-130a-5p	66.3819	0.548154	0.350687	1.56562	0.117437	0.389854	miR-130a-5p
hsa-miR-130b-3p	7356.93	0.399485	0.161257	2.47732	0.0132373	0.101807	miR-130b-3p
hsa-miR-130b-5p	166.465	0.438121	0.207495	2.11147	0.0347323	0.190802	miR-130b-5p
hsa-miR-132-3p	379.018	-0.719259	0.214059	-3.3565	0.000789364	0.0115138	miR-132-3p
hsa-miR-132-5p	42.5681	-1.21014	0.291439	-4.11884	3.80777e-05	0.000947463	miR-132-5p
hsa-miR-133a-3p	4.30973	-1.03078	0.633942	-1.79854	0.0720922		miR-133a-3p
hsa-miR-134-5p	20.4318	0.312836	0.59927	0.597049	0.550475	0.832308	miR-134-5p
hsa-miR-1343-3p	4.49115	-0.118733	0.592146	-0.202349	0.839644		miR-1343-3p
hsa-miR-135b-3p	3.38951	-0.877948	0.633169	-1.47419	0.140431		miR-135b-3p
hsa-miR-135b-5p	192.187	-1.60075	0.245858	-6.50701	7.66633e-11	4.05357e-09	miR-135b-5p
hsa-miR-136-3p	4.76142	-0.0349135	0.639663	-0.0688413	0.945116		miR-136-3p
hsa-miR-137-3p	1199.36	-0.448355	0.188122	-2.38853	0.0169158	0.11602	miR-137-3p
hsa-miR-137-5p	12.8397	-0.234857	0.560015	-0.568567	0.56965		miR-137-5p
hsa-miR-138-1-3p	20.7355	-0.199916	0.386484	-0.513484	0.607613	0.83558	miR-138-1-3p
hsa-miR-138-5p	772.017	-0.180134	0.188515	-0.955026	0.339565	0.687253	miR-138-5p
hsa-miR-139-5p	4.37928	-0.634289	0.605079	-0.994603	0.319929		miR-139-5p
hsa-miR-140-3p	8381.69	0.0387754	0.13244	0.29279	0.769683	0.930217	miR-140-3p
hsa-miR-140-5p	1704.44	0.097667	0.188888	0.517078	0.605102	0.83558	miR-140-5p
hsa-miR-141-3p	24.823	-0.908008	0.360034	-2.49568	0.0125717	0.101297	miR-141-3p
hsa-miR-142-3p	10.5747	-0.0813513	0.49625	-0.158314	0.874209		miR-142-3p
hsa-miR-142-5p	7.91553	0.807557	0.572783	1.38314	0.166623		miR-142-5p
hsa-miR-143-3p	7.24057	-0.0899017	0.506741	-0.168375	0.866289		miR-143-3p
hsa-miR-144-3p	0.531109	0.613266	0.430886	1.08612	0.277428		miR-144-3p
hsa-miR-145-5p	9.3721	0.431172	0.47693	0.90387	0.366064		miR-145-5p
hsa-miR-1468-5p	5.22989	-0.309385	0.606656	-0.570611	0.568263		miR-1468-5p
hsa-miR-146a-3p	1582.76	0.148117	0.182037	0.813619	0.415863	0.748554	miR-146a-3p
hsa-miR-146a-5p	1.11965e+06	0.280079	0.117016	2.39342	0.0166921	0.11602	miR-146a-5p
hsa-miR-146b-3p	1.18332	0.536905	0.605398	0.888974	0.374017		miR-146b-3p
hsa-miR-146b-5p	1236.59	0.233137	0.160964	1.44836	0.147515	0.445706	miR-146b-5p
hsa-miR-147b-3p	3.05503	-0.0139885	0.631046	-0.0143608	0.988542		miR-147b-3p
hsa-miR-148a-3p	18593.6	0.366235	0.211589	1.73091	0.0834685	0.312116	miR-148a-3p
hsa-miR-148a-5p	13.2225	0.206437	0.424923	0.486184	0.626837		miR-148a-5p
hsa-miR-148b-3p	16366	-0.0409911	0.128645	-0.318634	0.750004	0.922339	miR-148b-3p
hsa-miR-148b-5p	108.67	-0.35829	0.189619	-1.88654	0.0592221	0.260168	miR-148b-5p
hsa-miR-149-5p	371.339	-0.396844	0.252302	-1.57687	0.114825	0.388567	miR-149-5p
hsa-miR-150-5p	8.80684	-0.711056	0.546814	-1.32422	0.185432		miR-150-5p
hsa-miR-151a-3p	18997	0.193659	0.160935	1.20337	0.228833	0.552325	miR-151a-3p
hsa-miR-151a-5p	103.504	0.00934873	0.211914	0.0433725	0.965405	0.99577	miR-151a-5p
hsa-miR-151b	17.3394	0.20527	0.37804	0.543597	0.586719	0.834156	miR-151b
hsa-miR-152-3p	14618.5	0.296771	0.12435	2.38659	0.0170053	0.11602	miR-152-3p
hsa-miR-152-5p	10.1288	-0.204393	0.484307	-0.423583	0.67187		miR-152-5p
hsa-miR-1537-3p	34.2085	0.0147372	0.367703	0.0428276	0.965839	0.99577	miR-1537-3p
hsa-miR-1537-5p	106.295	0.167836	0.258462	0.649955	0.515721	0.810634	miR-1537-5p
hsa-miR-155-5p	2649.93	-0.593758	0.157829	-3.76144	0.000168938	0.00357304	miR-155-5p
hsa-miR-15a-3p	28.5215	-0.408928	0.326621	-1.24372	0.213601	0.543702	miR-15a-3p
hsa-miR-15a-5p	10132.5	0.132897	0.138161	0.961889	0.336105	0.686824	miR-15a-5p
hsa-miR-15b-3p	2739.84	0.639801	0.204237	3.13266	0.00173232	0.0222052	miR-15b-3p
hsa-miR-15b-5p	21796.9	0.289589	0.146077	1.98242	0.0474327	0.231329	miR-15b-5p
hsa-miR-16-1-3p	116.178	-0.00648886	0.29415	-0.0214802	0.982863	0.99577	miR-16-1-3p
hsa-miR-16-2-3p	244.082	0.286532	0.188492	1.52013	0.128479	0.411717	miR-16-2-3p
hsa-miR-16-5p	353119	0.349765	0.12362	2.82935	0.00466431	0.0458838	miR-16-5p
hsa-miR-17-3p	211.76	-0.222161	0.224997	-0.985853	0.324205	0.676724	miR-17-3p
hsa-miR-17-5p	2934.82	0.283934	0.136431	2.08115	0.0374202	0.202932	miR-17-5p
hsa-miR-181a-2-3p	2743.1	0.315097	0.180107	1.74972	0.0801664	0.312116	miR-181a-2-3p
hsa-miR-181a-3p	592.785	-0.23495	0.185677	-1.26593	0.205539	0.533392	miR-181a-3p
hsa-miR-181a-5p	1821.17	-0.0840998	0.158014	-0.532749	0.594208	0.834156	miR-181a-5p
hsa-miR-181b-2-3p	354.727	0.170008	0.204375	0.828738	0.407252	0.748455	miR-181b-2-3p
hsa-miR-181b-3p	85.1755	-0.437492	0.258178	-1.6973	0.0896405	0.324523	miR-181b-3p
hsa-miR-181b-5p	1557.17	-0.0297036	0.153156	-0.194778	0.845567	0.96734	miR-181b-5p
hsa-miR-181c-3p	29.3217	-0.0328004	0.353123	-0.0958854	0.923612	0.98484	miR-181c-3p
hsa-miR-181c-5p	11.479	-0.164134	0.48722	-0.33199	0.739897		miR-181c-5p
hsa-miR-181d-5p	13.2362	-0.285634	0.451575	-0.637743	0.523641		miR-181d-5p
hsa-miR-182-5p	24.3433	-0.729557	0.375418	-1.93965	0.0524224	0.238863	miR-182-5p
hsa-miR-183-5p	4.73414	-1.46743	0.589043	-2.40043	0.0163756		miR-183-5p
hsa-miR-184	13.0301	1.11943	0.521427	2.20843	0.0272143		miR-184
hsa-miR-1843	28.943	-0.135058	0.361355	-0.370366	0.71111	0.885378	miR-1843
hsa-miR-185-3p	53.3442	0.290586	0.287348	1.01179	0.311637	0.667043	miR-185-3p
hsa-miR-185-5p	8705.33	0.100243	0.140493	0.713504	0.475534	0.791256	miR-185-5p
hsa-miR-186-3p	52.1852	0.145587	0.276394	0.527712	0.5977	0.834156	miR-186-3p
hsa-miR-186-5p	17979.9	0.10806	0.153153	0.705556	0.480464	0.791256	miR-186-5p
hsa-miR-187-3p	57.7013	-1.93871	0.328959	-5.85391	4.80145e-09	2.25668e-07	miR-187-3p
hsa-miR-188-3p	13.5052	0.122345	0.437384	0.282027	0.777923		miR-188-3p
hsa-miR-188-5p	89.6561	0.0174774	0.210452	0.0847145	0.932488	0.987068	miR-188-5p
hsa-miR-18a-3p	27.649	-0.220627	0.354568	-0.618882	0.535994	0.824456	miR-18a-3p
hsa-miR-18a-5p	922.652	0.0372112	0.187457	0.198638	0.842546	0.96734	miR-18a-5p
hsa-miR-18b-3p	9.74091	0.460975	0.51647	0.903441	0.366292		miR-18b-3p
hsa-miR-18b-5p	71.0843	-0.0598717	0.292981	-0.212186	0.831962	0.966744	miR-18b-5p
hsa-miR-1908-3p	2.57242	0.309975	0.643549	0.495598	0.620178		miR-1908-3p
hsa-miR-1908-5p	5.80872	0.502776	0.585676	0.867368	0.385741		miR-1908-5p
hsa-miR-190a-3p	4.88993	0.110766	0.618451	0.177664	0.858987		miR-190a-3p
hsa-miR-190a-5p	2225.8	-0.0453302	0.23995	-0.189159	0.849968	0.96734	miR-190a-5p
hsa-miR-190b-5p	63.7834	-0.11662	0.261521	-0.446659	0.655121	0.871435	miR-190b-5p
hsa-miR-191-3p	271.666	0.0694663	0.180555	0.384129	0.700883	0.885378	miR-191-3p
hsa-miR-191-5p	128205	0.375752	0.15791	2.37959	0.0173318	0.116371	miR-191-5p
hsa-miR-1911-5p	2.66671	-0.551697	0.643966	-0.757744	0.448604		miR-1911-5p
hsa-miR-1914-3p	2.95944	0.103849	0.638947	0.16135	0.871818		miR-1914-3p
hsa-miR-1914-5p	3.47633	-0.991074	0.622666	-1.60623	0.108223		miR-1914-5p
hsa-miR-192-3p	22.7682	0.880422	0.365788	2.39686	0.0165362	0.11602	miR-192-3p
hsa-miR-192-5p	2871.27	0.0928177	0.134232	0.691526	0.489235	0.791256	miR-192-5p
hsa-miR-193a-3p	24.1013	-0.501486	0.34059	-1.46125	0.143946	0.441226	miR-193a-3p
hsa-miR-193a-5p	966.555	-0.262598	0.174079	-1.50858	0.131406	0.414812	miR-193a-5p
hsa-miR-193b-3p	60.3345	0.095303	0.342531	0.276559	0.782119	0.939876	miR-193b-3p
hsa-miR-193b-5p	199.874	-0.0680395	0.210436	-0.325882	0.744514	0.922339	miR-193b-5p
hsa-miR-194-3p	7.11965	0.198895	0.533298	0.373546	0.708742		miR-194-3p
hsa-miR-194-5p	635.032	-0.0715488	0.126167	-0.566506	0.57105	0.832945	miR-194-5p
hsa-miR-195-3p	24.6626	-0.0450072	0.425619	-0.113665	0.909503	0.982581	miR-195-3p
hsa-miR-195-5p	466.419	0.274053	0.164846	1.66241	0.0964316	0.339921	miR-195-5p
hsa-miR-196a-3p	27.7303	-0.250083	0.326317	-0.761726	0.446223	0.786469	miR-196a-3p
hsa-miR-196a-5p	7529.1	0.184229	0.150897	1.2209	0.222124	0.546271	miR-196a-5p
hsa-miR-196b-5p	78.1093	-0.207564	0.235314	-0.876656	0.380674	0.724193	miR-196b-5p
hsa-miR-197-3p	376.906	0.00153822	0.203276	0.00773965	0.993825	0.99873	miR-197-3p
hsa-miR-197-5p	10.2427	0.369272	0.488467	0.756838	0.449147		miR-197-5p
hsa-miR-1976	5.60044	-0.529115	0.563844	-0.907287	0.364255		miR-1976
hsa-miR-199a-3p	392.636	-0.736818	0.159338	-4.62813	3.68987e-06	0.000104054	miR-199a-3p
hsa-miR-199a-5p	8.91401	-0.115002	0.52288	-0.241121	0.809461		miR-199a-5p
hsa-miR-199b-5p	1520.11	-0.588729	0.166481	-3.53766	0.00040369	0.00656773	miR-199b-5p
hsa-miR-19a-3p	6675.48	0.0420127	0.230326	0.182359	0.855301	0.96734	miR-19a-3p
hsa-miR-19b-1-5p	15.5129	-0.380966	0.404757	-0.924509	0.355221	0.70544	miR-19b-1-5p
hsa-miR-19b-3p	12791.2	0.0914678	0.220664	0.41444	0.678552	0.881462	miR-19b-3p
hsa-miR-200a-3p	21.1958	-0.19658	0.338536	-0.57256	0.566943	0.832945	miR-200a-3p
hsa-miR-200b-3p	16.1811	-0.162291	0.383976	-0.416836	0.676798	0.881462	miR-200b-3p
hsa-miR-200c-3p	15.2889	-0.210491	0.405855	-0.51234	0.608413	0.83558	miR-200c-3p
hsa-miR-203a-3p	215.313	0.00302898	0.308503	0.00893249	0.992873	0.99873	miR-203a-3p
hsa-miR-204-5p	239.577	-0.212744	0.208887	-1.01788	0.308733	0.667043	miR-204-5p
hsa-miR-205-5p	3.27045	-0.664481	0.643701	-1.06416	0.287256		miR-205-5p
hsa-miR-20a-3p	195.909	0.117949	0.204389	0.577694	0.563471	0.832945	miR-20a-3p
hsa-miR-20a-5p	15675.4	-0.113415	0.126383	-0.897344	0.369535	0.720339	miR-20a-5p
hsa-miR-20b-5p	16503.7	0.337807	0.147946	2.28352	0.0223999	0.141521	miR-20b-5p
hsa-miR-21-3p	2003.21	-0.997987	0.200775	-4.97096	6.66214e-07	2.01292e-05	miR-21-3p
hsa-miR-21-5p	94500.8	-0.753875	0.1495	-5.04268	4.5905e-07	1.49368e-05	miR-21-5p
hsa-miR-210-3p	1299.06	0.0630537	0.200981	0.313626	0.753805	0.922339	miR-210-3p
hsa-miR-210-5p	1.11484	0.357651	0.601555	0.625313	0.531765		miR-210-5p
hsa-miR-211-3p	357.77	0.725603	0.213401	3.39755	0.000679931	0.0102718	miR-211-3p
hsa-miR-211-5p	28414.8	0.52617	0.211548	2.48565	0.0129315	0.101297	miR-211-5p
hsa-miR-2110	89.6299	0.263632	0.251002	1.05025	0.293601	0.655154	miR-2110
hsa-miR-2116-3p	48.2744	0.533904	0.29795	1.7942	0.0727814	0.296024	miR-2116-3p
hsa-miR-2116-5p	58.1913	-0.0834107	0.281751	-0.305141	0.760258	0.924107	miR-2116-5p
hsa-miR-212-3p	21.3737	-1.09071	0.379378	-2.81946	0.00481038	0.0462452	miR-212-3p
hsa-miR-212-5p	6.0921	-0.858689	0.583723	-1.36226	0.173117		miR-212-5p
hsa-miR-215-5p	36.9311	0.203541	0.275954	0.738829	0.460011	0.790144	miR-215-5p
hsa-miR-216a-3p	1.21389	0.275268	0.615227	0.389069	0.697225		miR-216a-3p
hsa-miR-216a-5p	7.79654	-0.243594	0.585149	-0.389313	0.697045		miR-216a-5p
hsa-miR-217-5p	3.40836	-0.238926	0.617466	-0.356267	0.721641		miR-217-5p
hsa-miR-218-5p	366.667	-0.154308	0.186624	-0.82613	0.408731	0.748455	miR-218-5p
hsa-miR-219a-1-3p	6.66755	-0.676869	0.562875	-1.22276	0.221422		miR-219a-1-3p
hsa-miR-219a-5p	24.0355	-0.231681	0.402588	-0.566611	0.570978	0.832945	miR-219a-5p
hsa-miR-219b-5p	11.7464	0.941268	0.470126	1.98956	0.0466393		miR-219b-5p
hsa-miR-22-3p	12388.5	-0.192548	0.137947	-1.39586	0.162756	0.46834	miR-22-3p
hsa-miR-22-5p	262.559	-0.178022	0.175022	-1.01779	0.308778	0.667043	miR-22-5p
hsa-miR-221-3p	48992.4	-1.26515	0.123794	-10.2197	1.618e-24	3.42206e-22	miR-221-3p
hsa-miR-221-5p	487.036	-1.31964	0.162014	-8.14269	3.86596e-16	2.72551e-14	miR-221-5p
hsa-miR-222-3p	8854.53	-1.18426	0.131733	-8.9898	2.47685e-19	2.61927e-17	miR-222-3p
hsa-miR-222-5p	104.327	-1.30915	0.242606	-5.38885	7.09087e-08	2.99944e-06	miR-222-5p
hsa-miR-223-3p	15.1553	-0.20657	0.509085	-0.415361	0.677877	0.881462	miR-223-3p
hsa-miR-2276-3p	6.18199	-1.19004	0.542085	-2.11164	0.0347174		miR-2276-3p
hsa-miR-2277-3p	13.6922	-0.195554	0.435491	-0.453849	0.649937		miR-2277-3p
hsa-miR-2277-5p	6.10572	-0.210715	0.571495	-0.377595	0.705731		miR-2277-5p
hsa-miR-2278	35.8716	-0.0799638	0.311707	-0.256483	0.797578	0.947683	miR-2278
hsa-miR-2355-3p	30.999	-0.247293	0.348586	-0.715903	0.474051	0.791256	miR-2355-3p
hsa-miR-2355-5p	6.8927	-1.03164	0.543101	-1.87382	0.0609557		miR-2355-5p
hsa-miR-23a-3p	79337.8	-0.216523	0.131733	-1.64366	0.100246	0.347576	miR-23a-3p
hsa-miR-23a-5p	139.945	-0.162479	0.19317	-0.844406	0.398442	0.739216	miR-23a-5p
hsa-miR-23b-3p	2951.81	-0.492946	0.138493	-3.56	0.000370849	0.00627477	miR-23b-3p
hsa-miR-23b-5p	44.67	0.0259632	0.313241	0.072587	0.942135	0.988891	miR-23b-5p
hsa-miR-23c	222.069	0.0991884	0.232199	0.426752	0.66956	0.881462	miR-23c
hsa-miR-24-1-5p	3.60926	-0.822984	0.635808	-1.45189	0.146533		miR-24-1-5p
hsa-miR-24-2-5p	26.1517	-0.0161671	0.392457	-0.0421177	0.966405	0.99577	miR-24-2-5p
hsa-miR-24-3p	45741.3	-0.0875432	0.112593	-0.777526	0.436848	0.774498	miR-24-3p
hsa-miR-25-3p	58326.6	0.377673	0.105818	3.56908	0.000358239	0.00627477	miR-25-3p
hsa-miR-25-5p	127.617	-0.00706074	0.196394	-0.0349697	0.972104	0.99577	miR-25-5p
hsa-miR-2682-3p	26.2428	-0.52075	0.489248	-1.25626	0.20902	0.536264	miR-2682-3p
hsa-miR-2682-5p	9.02697	-0.702982	0.564801	-1.38022	0.16752		miR-2682-5p
hsa-miR-26a-1-3p	272.752	0.413396	0.203425	2.03234	0.0421194	0.217274	miR-26a-1-3p
hsa-miR-26a-2-3p	387.034	0.300704	0.171133	1.75703	0.0789127	0.311963	miR-26a-2-3p
hsa-miR-26a-5p	17710.9	0.0271772	0.149489	0.181799	0.855741	0.96734	miR-26a-5p
hsa-miR-26b-3p	166.921	0.498224	0.179426	2.77671	0.00549129	0.050496	miR-26b-3p
hsa-miR-26b-5p	86701.9	0.222497	0.153327	1.45111	0.146749	0.445706	miR-26b-5p
hsa-miR-27a-3p	127758	-0.427789	0.153067	-2.79472	0.00519442	0.0488275	miR-27a-3p
hsa-miR-27a-5p	478.153	-0.300451	0.192067	-1.56529	0.117515	0.389854	miR-27a-5p
hsa-miR-27b-3p	18639.4	0.0993958	0.179239	0.554615	0.579158	0.833652	miR-27b-3p
hsa-miR-27b-5p	22.393	0.163409	0.406621	0.392101	0.694984	0.885378	miR-27b-5p
hsa-miR-28-3p	16486.7	0.35053	0.137249	2.55402	0.0106486	0.0900871	miR-28-3p
hsa-miR-28-5p	217.133	0.047781	0.172054	0.277405	0.781469	0.939876	miR-28-5p
hsa-miR-296-3p	369.031	0.327105	0.173189	1.88864	0.0589402	0.260168	miR-296-3p
hsa-miR-296-5p	134.844	-0.213864	0.24471	-0.874613	0.381785	0.724193	miR-296-5p
hsa-miR-299-3p	8.31512	-0.331301	0.601894	-0.732854	0.463648		miR-299-3p
hsa-miR-299-5p	2.92174	0.310787	0.640462	0.631375	0.527796		miR-299-5p
hsa-miR-29a-3p	211075	-0.401619	0.16579	-2.4223	0.0154225	0.115229	miR-29a-3p
hsa-miR-29a-5p	248.275	-0.671368	0.16877	-3.97528	7.02971e-05	0.00165198	miR-29a-5p
hsa-miR-29b-1-5p	253.591	-0.346355	0.154555	-2.24	0.0250911	0.151622	miR-29b-1-5p
hsa-miR-29b-2-5p	16.5894	0.351448	0.429078	0.81963	0.412427	0.748554	miR-29b-2-5p
hsa-miR-29b-3p	40849.6	-0.308838	0.38799	-0.793401	0.427544	0.765588	miR-29b-3p
hsa-miR-29c-3p	2911.19	0.0303189	0.203211	0.14921	0.881388	0.973439	miR-29c-3p
hsa-miR-29c-5p	46.4384	0.203742	0.262534	0.776252	0.4376	0.774498	miR-29c-5p
hsa-miR-301a-3p	4510.11	0.161875	0.252916	0.639981	0.522185	0.812074	miR-301a-3p
hsa-miR-301a-5p	89.5341	0.431437	0.233324	1.84908	0.0644468	0.272264	miR-301a-5p
hsa-miR-301b-3p	264.375	0.164972	0.248047	0.665145	0.505958	0.804587	miR-301b-3p
hsa-miR-301b-5p	6.99574	0.495217	0.50893	0.970867	0.331615		miR-301b-5p
hsa-miR-302a-5p	23.8415	-0.131667	0.467062	-0.272631	0.785137	0.940829	miR-302a-5p
hsa-miR-302b-3p	7.42533	-0.47574	0.541449	-0.836626	0.402803		miR-302b-3p
hsa-miR-302d-3p	1.54215	0.44382	0.638262	0.580451	0.561611		miR-302d-3p
hsa-miR-3064-5p	10.8151	-0.199669	0.479549	-0.415582	0.677716		miR-3064-5p
hsa-miR-3065-3p	80.8584	-0.489782	0.23062	-2.12034	0.0339776	0.190802	miR-3065-3p
hsa-miR-3065-5p	374.258	-0.727116	0.143932	-5.05017	4.41416e-07	1.49368e-05	miR-3065-5p
hsa-miR-30a-3p	3263.64	0.277825	0.143042	1.94227	0.0521047	0.238863	miR-30a-3p
hsa-miR-30a-5p	29317.6	-0.118563	0.142678	-0.830998	0.405975	0.748455	miR-30a-5p
hsa-miR-30b-3p	130.296	0.22163	0.211405	1.04878	0.294277	0.655154	miR-30b-3p
hsa-miR-30b-5p	20029.2	0.129645	0.250575	0.517171	0.605037	0.83558	miR-30b-5p
hsa-miR-30c-1-3p	180.525	0.49346	0.170049	2.90173	0.00371108	0.0407474	miR-30c-1-3p
hsa-miR-30c-2-3p	380.329	0.292543	0.167499	1.74604	0.0808044	0.312116	miR-30c-2-3p
hsa-miR-30c-5p	13310.2	0.244469	0.174103	1.40422	0.160255	0.467501	miR-30c-5p
hsa-miR-30d-3p	402.48	0.0902536	0.160886	0.561618	0.574376	0.833652	miR-30d-3p
hsa-miR-30d-5p	47871.9	-0.0646876	0.16354	-0.395509	0.692467	0.885378	miR-30d-5p
hsa-miR-30e-3p	2318.48	0.450454	0.204089	2.20713	0.0273048	0.160416	miR-30e-3p
hsa-miR-30e-5p	23042.1	-0.201716	0.169547	-1.18962	0.234198	0.559693	miR-30e-5p
hsa-miR-31-3p	165.325	-2.08749	0.215587	-9.65146	4.84624e-22	6.83319e-20	miR-31-3p
hsa-miR-31-5p	7689.3	-2.13737	0.163332	-13.0835	4.08996e-39	1.73005e-36	miR-31-5p
hsa-miR-3117-3p	13.9672	0.176014	0.40277	0.441094	0.659145		miR-3117-3p
hsa-miR-3120-3p	5.31602	-0.141304	0.569025	-0.265905	0.790313		miR-3120-3p
hsa-miR-3124-5p	2.95592	0.897481	0.639814	1.40344	0.160486		miR-3124-5p
hsa-miR-3126-3p	7.95275	-0.143659	0.554415	-0.277258	0.781582		miR-3126-3p
hsa-miR-3127-5p	4.72483	-0.066375	0.590865	-0.110359	0.912125		miR-3127-5p
hsa-miR-3128	3.72669	-0.674181	0.619583	-1.08208	0.279218		miR-3128
hsa-miR-3129-3p	9.46027	-0.242527	0.50436	-0.512578	0.608246		miR-3129-3p
hsa-miR-3129-5p	27.0965	0.0552945	0.374617	0.137407	0.890709	0.976302	miR-3129-5p
hsa-miR-3131	2.49765	0.00436178	0.644419	-0.00815567	0.993493		miR-3131
hsa-miR-3136-5p	16.1754	0.37072	0.405252	0.914831	0.36028	0.707391	miR-3136-5p
hsa-miR-3138	9.70762	-0.0193228	0.495178	-0.0442223	0.964727		miR-3138
hsa-miR-3140-3p	8.05324	0.341741	0.517918	0.658257	0.510373		miR-3140-3p
hsa-miR-3143	4.75241	0.182122	0.57101	0.319814	0.749109		miR-3143
hsa-miR-3145-3p	14.2275	-0.103093	0.414557	-0.243377	0.807713		miR-3145-3p
hsa-miR-3146	4.11929	-0.550618	0.617863	-0.93732	0.348594		miR-3146
hsa-miR-3148	2.32471	0.205113	0.644843	0.324759	0.745363		miR-3148
hsa-miR-3149	1.82015	0.370743	0.632404	0.701071	0.483259		miR-3149
hsa-miR-3150b-3p	2.68787	-0.518833	0.630667	-0.807461	0.419401		miR-3150b-3p
hsa-miR-3154	7.53528	-0.338552	0.591985	-0.684417	0.493712		miR-3154
hsa-miR-3157-5p	28.1948	0.0187291	0.333103	0.0557826	0.955515	0.99577	miR-3157-5p
hsa-miR-3164	13.57	0.409202	0.436609	0.93392	0.350345		miR-3164
hsa-miR-3168	7.45843	0.259554	0.368857	1.50632			miR-3168
hsa-miR-3170	4.07591	0.363123	0.62678	0.611551	0.540835		miR-3170
hsa-miR-3173-5p	46.9621	-0.166774	0.335011	-0.498879	0.617865	0.845815	miR-3173-5p
hsa-miR-3174	3.02172	-0.248253	0.63217	-0.385153	0.700124		miR-3174
hsa-miR-3176	9.62132	0.243854	0.476035	0.511696	0.608864		miR-3176
hsa-miR-3183	2.93621	0.729532	0.622656	1.10318	0.26995		miR-3183
hsa-miR-3187-3p	18.8048	-0.0505028	0.439999	-0.118517	0.905658	0.982581	miR-3187-3p
hsa-miR-3189-3p	14.5441	0.0194669	0.420357	0.0533628	0.957443		miR-3189-3p
hsa-miR-3190-3p	4.13838	0.733314	0.597705	1.22173	0.221809		miR-3190-3p
hsa-miR-3191-3p	2.58038	0.00488745	0.643337	-0.00855483	0.993174		miR-3191-3p
hsa-miR-3192-5p	6.27413	0.838525	0.560393	1.48163	0.138439		miR-3192-5p
hsa-miR-3194-5p	4.87559	-0.102722	0.58463	-0.193657	0.846444		miR-3194-5p
hsa-miR-3199	7.43349	-0.421301	0.518324	-0.825505	0.409085		miR-3199
hsa-miR-32-3p	138.051	0.53209	0.269597	1.97306	0.0484884	0.231329	miR-32-3p
hsa-miR-32-5p	461.652	-0.35225	0.245748	-1.4317	0.152231	0.456692	miR-32-5p
hsa-miR-3200-3p	26.0001	-0.282519	0.380591	-0.747249	0.454913	0.790144	miR-3200-3p
hsa-miR-320a-3p	2691.32	-0.184479	0.193073	-0.955594	0.339278	0.687253	miR-320a-3p
hsa-miR-320b	23.1541	-0.0826941	0.347327	-0.241703	0.80901	0.953235	miR-320b
hsa-miR-320c	5.57544	-0.45374	0.555893	-0.831859	0.405489		miR-320c
hsa-miR-320d	5.66717	0.0264103	0.553962	0.0414239	0.966958		miR-320d
hsa-miR-320e	2.92596	0.255078	0.635658	0.412358	0.680077		miR-320e
hsa-miR-323a-3p	1.93758	-0.371646	0.632505	-0.877469	0.380232		miR-323a-3p
hsa-miR-324-3p	1311.88	0.204501	0.13732	1.48923	0.136427	0.427472	miR-324-3p
hsa-miR-324-5p	1630.24	0.131549	0.175188	0.750909	0.452707	0.790144	miR-324-5p
hsa-miR-326	139.098	0.17366	0.201741	0.861013	0.389231	0.731754	miR-326
hsa-miR-328-3p	316.986	-0.0916663	0.217484	-0.422067	0.672976	0.881462	miR-328-3p
hsa-miR-330-3p	144.355	0.0980864	0.202844	0.483174	0.628972	0.850017	miR-330-3p
hsa-miR-330-5p	149.636	-0.214971	0.215443	-0.995649	0.319421	0.672677	miR-330-5p
hsa-miR-331-3p	936.991	0.0175517	0.148683	0.118022	0.90605	0.982581	miR-331-3p
hsa-miR-331-5p	23.252	0.202008	0.342043	0.590367	0.554944	0.832417	miR-331-5p
hsa-miR-335-3p	2.66776	-0.716138	0.640735	-1.25548	0.209303		miR-335-3p
hsa-miR-335-5p	457.882	0.376101	0.188641	1.99352	0.0462043	0.229935	miR-335-5p
hsa-miR-337-5p	9.77644	0.133212	0.626035	0.150639	0.88026		miR-337-5p
hsa-miR-338-3p	1484	-0.425647	0.196982	-2.16095	0.0306993	0.175484	miR-338-3p
hsa-miR-339-3p	182.537	-0.25214	0.189971	-1.32674	0.184593	0.503761	miR-339-3p
hsa-miR-339-5p	1588.31	-0.17948	0.183799	-0.97651	0.328812	0.678475	miR-339-5p
hsa-miR-33a-3p	64.1157	0.054005	0.24286	0.223137	0.823429	0.959533	miR-33a-3p
hsa-miR-33a-5p	491.574	-0.324692	0.438668	-0.736569	0.461384	0.790144	miR-33a-5p
hsa-miR-33b-3p	4.85739	0.20431	0.580001	0.351909	0.724906		miR-33b-3p
hsa-miR-33b-5p	48.0167	-0.762585	0.339958	-2.2266	0.0259743	0.154748	miR-33b-5p
hsa-miR-340-3p	97.1641	0.297288	0.225466	1.31884	0.187223	0.507662	miR-340-3p
hsa-miR-340-5p	1214.69	-0.21272	0.182198	-1.16698	0.243219	0.573147	miR-340-5p
hsa-miR-342-3p	2027.07	0.410491	0.178625	2.29807	0.0215578	0.140292	miR-342-3p
hsa-miR-342-5p	46.3926	0.662453	0.290117	2.28325	0.0224158	0.141521	miR-342-5p
hsa-miR-345-3p	29.7628	0.0881777	0.301164	0.294234	0.768579	0.930217	miR-345-3p
hsa-miR-345-5p	977.728	-0.0253865	0.161702	-0.156696	0.875485	0.973439	miR-345-5p
hsa-miR-34a-3p	309.058	0.557141	0.170906	3.25968	0.00111538	0.0152196	miR-34a-3p
hsa-miR-34a-5p	94701.8	0.242216	0.12861	1.8833	0.0596602	0.260168	miR-34a-5p
hsa-miR-34b-3p	17.1292	-0.0634745	0.463994	-0.168986	0.865808	0.971352	miR-34b-3p
hsa-miR-34b-5p	22.9296	0.0339628	0.370771	0.083571	0.933397	0.987068	miR-34b-5p
hsa-miR-34c-3p	4.48988	-0.407293	0.59957	-0.722021	0.470281		miR-34c-3p
hsa-miR-34c-5p	70.832	-0.19515	0.314917	-0.623418	0.53301	0.822858	miR-34c-5p
hsa-miR-3605-3p	92.7943	0.232783	0.26247	0.886851	0.375159	0.724193	miR-3605-3p
hsa-miR-3605-5p	26.2718	-0.189114	0.341504	-0.554236	0.579417	0.833652	miR-3605-5p
hsa-miR-3609	178.902	0.476015	0.28419	1.67612	0.0937156	0.333123	miR-3609
hsa-miR-361-3p	6990.86	-0.00308407	0.153684	-0.0200552	0.983999	0.99577	miR-361-3p
hsa-miR-361-5p	5521.13	0.154758	0.130754	1.18359	0.236577	0.562202	miR-361-5p
hsa-miR-3611	61.5768	-0.289982	0.262911	-1.09771	0.27233	0.626063	miR-3611
hsa-miR-3613-3p	14.5633	0.356491	0.433721	0.821504	0.411359		miR-3613-3p
hsa-miR-3613-5p	451.737	-0.357806	0.289005	-1.23617	0.216395	0.543702	miR-3613-5p
hsa-miR-3615	13.1198	-0.358782	0.432879	-0.83344	0.404597		miR-3615
hsa-miR-362-3p	34.2134	-0.166577	0.310308	-0.529169	0.596688	0.834156	miR-362-3p
hsa-miR-362-5p	274.077	0.130646	0.153873	0.849288	0.395721	0.737401	miR-362-5p
hsa-miR-3620-3p	3.14632	0.0142266	0.631063	0.0135588	0.989182		miR-3620-3p
hsa-miR-363-3p	1410.46	0.133536	0.151849	0.878942	0.379433	0.724193	miR-363-3p
hsa-miR-363-5p	42.9614	0.557917	0.338777	1.65271	0.098389	0.343955	miR-363-5p
hsa-miR-3651	4.10388	0.130126	0.626415	0.205099	0.837495		miR-3651
hsa-miR-3657	2.65487	0.200916	0.642861	0.304175	0.760994		miR-3657
hsa-miR-3659	1.42305	0.930823	0.625353	1.1867	0.235346		miR-3659
hsa-miR-365a-3p	1188.97	-0.188641	0.262095	-0.71969	0.471716	0.791256	miR-365a-3p
hsa-miR-365a-5p	14.6528	0.164194	0.426913	0.380569	0.703523		miR-365a-5p
hsa-miR-365b-3p	14.1601	0.270525	0.441936	0.611969	0.540558		miR-365b-3p
hsa-miR-365b-5p	20.0037	-0.784746	0.393202	-1.99368	0.0461875	0.229935	miR-365b-5p
hsa-miR-3661	9.17894	0.864543	0.508662	1.70226	0.0887073		miR-3661
hsa-miR-3662	17.7184	0.296455	0.375193	0.790996	0.428946	0.765588	miR-3662
hsa-miR-3679-5p	34.8343	-0.423511	0.331428	-1.27937	0.200768	0.529182	miR-3679-5p
hsa-miR-3684	4.18044	-0.126175	0.621987	-0.193391	0.846652		miR-3684
hsa-miR-3688-3p	5.00667	0.394699	0.56771	0.688242	0.4913		miR-3688-3p
hsa-miR-369-3p	3.03607	0.110986	0.641363	0.171411	0.8639		miR-369-3p
hsa-miR-369-5p	1.80195	-0.532783	0.631774	-1.23633	0.216334		miR-369-5p
hsa-miR-370-3p	33.1231	0.716984	0.569441	1.50948	0.131177	0.414812	miR-370-3p
hsa-miR-374a-3p	1496.09	0.0747127	0.290582	0.256943	0.797223	0.947683	miR-374a-3p
hsa-miR-374a-5p	5477.89	-0.00398307	0.16485	-0.0241112	0.980764	0.99577	miR-374a-5p
hsa-miR-374b-3p	185.93	0.556883	0.25314	2.19982	0.0278194	0.1612	miR-374b-3p
hsa-miR-374b-5p	1014.83	0.227461	0.154773	1.46964	0.141658	0.437383	miR-374b-5p
hsa-miR-375-3p	5.33237	0.664643	0.557	1.15684	0.247339		miR-375-3p
hsa-miR-376a-3p	10.3722	0.341758	0.635395	0.692245	0.488784		miR-376a-3p
hsa-miR-376b-3p	9.2046	0.607442	0.556735	1.14458	0.252383		miR-376b-3p
hsa-miR-376c-3p	8.775	0.145146	0.615505	0.204196	0.838201		miR-376c-3p
hsa-miR-378a-3p	794.951	-0.012727	0.133132	-0.0950112	0.924306	0.98484	miR-378a-3p
hsa-miR-378a-5p	1077.56	0.13941	0.140112	0.995196	0.319641	0.672677	miR-378a-5p
hsa-miR-378d	6.0192	-0.344027	0.515323	-0.631887	0.527461		miR-378d
hsa-miR-379-5p	28.2874	0.295069	0.547724	0.53804	0.590549	0.834156	miR-379-5p
hsa-miR-381-3p	7.63974	-0.0756722	0.636186	-0.395363	0.692575		miR-381-3p
hsa-miR-382-5p	21.647	-0.0360778	0.535831	-0.179468	0.857571	0.96734	miR-382-5p
hsa-miR-3909	7.82237	0.440869	0.530694	0.820143	0.412134		miR-3909
hsa-miR-3912-3p	11.7244	-0.174791	0.456611	-0.37684	0.706293		miR-3912-3p
hsa-miR-3913-3p	2.30077	0.209425	0.640983	0.31762	0.750773		miR-3913-3p
hsa-miR-3913-5p	7.03367	0.394551	0.512356	0.76561	0.443908		miR-3913-5p
hsa-miR-3928-3p	19.2648	0.254186	0.418248	0.606831	0.543963	0.828539	miR-3928-3p
hsa-miR-3934-3p	5.35616	-0.803654	0.545499	-1.44021	0.149809		miR-3934-3p
hsa-miR-3934-5p	1.33136	-0.541328	0.638654	-0.785325	0.432263		miR-3934-5p
hsa-miR-3935	3.19992	0.330311	0.640148	0.549994	0.582324		miR-3935
hsa-miR-3940-3p	56.9237	-0.0443189	0.269512	-0.166287	0.867931	0.971352	miR-3940-3p
hsa-miR-3943	1.24197	-0.189943	0.572006	-0.325365	0.744905		miR-3943
hsa-miR-409-3p	46.6827	0.541991	0.492344	1.16531	0.243892	0.573147	miR-409-3p
hsa-miR-411-5p	20.3603	0.296002	0.560945	0.531996	0.594728	0.834156	miR-411-5p
hsa-miR-421	461.973	-0.152377	0.140003	-1.08827	0.276477	0.629458	miR-421
hsa-miR-423-3p	1532.87	0.127056	0.181685	0.699327	0.484348	0.791256	miR-423-3p
hsa-miR-423-5p	3690.64	0.0472698	0.202715	0.233183	0.81562	0.955698	miR-423-5p
hsa-miR-424-3p	147.416	0.350856	0.248059	1.41333	0.157559	0.466066	miR-424-3p
hsa-miR-424-5p	8603.07	0.367259	0.228198	1.61033	0.107325	0.369095	miR-424-5p
hsa-miR-425-3p	927.853	0.0186056	0.123943	0.150089	0.880694	0.973439	miR-425-3p
hsa-miR-425-5p	3006.64	-0.183096	0.178861	-1.02362	0.306013	0.667043	miR-425-5p
hsa-miR-4289	5.09095	0.622195	0.552373	1.11064	0.266721		miR-4289
hsa-miR-429	6.97197	-0.636286	0.519703	-1.19736	0.231165		miR-429
hsa-miR-431-5p	1.79229	-0.157223	0.61443	-0.348142	0.727734		miR-431-5p
hsa-miR-432-5p	12.1399	0.495813	0.615457	1.13704	0.255523		miR-432-5p
hsa-miR-4326	24.7206	0.295891	0.336039	0.881119	0.378254	0.724193	miR-4326
hsa-miR-4425	21.1377	-0.342343	0.401537	-0.850288	0.395165	0.737401	miR-4425
hsa-miR-4428	0.834168	0	0.352053	0	1		miR-4428
hsa-miR-4431	3.96713	0.734634	0.586258	1.2294	0.218921		miR-4431
hsa-miR-4435	1.49706	-0.0909062	0.631282	-0.201894	0.839999		miR-4435
hsa-miR-4458	4.08139	-0.389565	0.607867	-0.675417	0.499411		miR-4458
hsa-miR-4467	2.28536	-0.040991	0.638598	-0.0470821	0.962448		miR-4467
hsa-miR-4473	3.67973	0.225902	0.6128	0.367545	0.713213		miR-4473
hsa-miR-449a	10.1772	-0.709961	0.462828	-1.51825	0.128953		miR-449a
hsa-miR-4504	2.42107	-0.5824	0.639758	-0.889121	0.373938		miR-4504
hsa-miR-450a-1-3p	35.8653	-0.330917	0.345994	-0.984716	0.324764	0.676724	miR-450a-1-3p
hsa-miR-450a-2-3p	18.9214	0.128113	0.499374	0.223585	0.82308	0.959533	miR-450a-2-3p
hsa-miR-450a-5p	12.7011	0.0909401	0.474298	0.177354	0.859231		miR-450a-5p
hsa-miR-450b-5p	146.538	0.26651	0.21953	1.21238	0.225367	0.547875	miR-450b-5p
hsa-miR-4521	2127.18	-0.0707173	0.181045	-0.390537	0.696139	0.885378	miR-4521
hsa-miR-4523	1.96909	-0.574196	0.643042	-0.998626	0.317976		miR-4523
hsa-miR-4525	5.42938	0.0223067	0.585176	0.0340281	0.972855		miR-4525
hsa-miR-454-3p	11063.5	0.351746	0.123167	2.85586	0.00429209	0.0432275	miR-454-3p
hsa-miR-454-5p	64.9119	0.0342459	0.249875	0.136408	0.891499	0.976302	miR-454-5p
hsa-miR-455-3p	815.606	0.332083	0.147546	2.25068	0.0244057	0.149618	miR-455-3p
hsa-miR-455-5p	1159.17	0.096433	0.16249	0.593414	0.552904	0.832308	miR-455-5p
hsa-miR-4636	7.01541	-0.183933	0.504103	-0.34555	0.729681		miR-4636
hsa-miR-4640-3p	5.12226	0.212064	0.578602	0.366798	0.71377		miR-4640-3p
hsa-miR-4640-5p	2.86223	-1.24755	0.640283	-2.15596	0.0310871		miR-4640-5p
hsa-miR-4645-3p	1.95767	0.995448	0.64444	1.43483	0.151335		miR-4645-3p
hsa-miR-4659a-3p	2.34711	0.696062	0.642448	1.00981	0.312589		miR-4659a-3p
hsa-miR-4662a-5p	55.4342	0.373588	0.292961	1.27399	0.202666	0.529182	miR-4662a-5p
hsa-miR-4664-3p	2.49103	0.349319	0.638604	0.551593	0.581227		miR-4664-3p
hsa-miR-4668-5p	5.68361	0.00843438	0.572623	0.00327004	0.997391		miR-4668-5p
hsa-miR-4676-3p	1.71994	-1.14882	0.629516	-2.10383	0.0353931		miR-4676-3p
hsa-miR-4677-3p	43.1694	-0.424476	0.310102	-1.36762	0.171431	0.483436	miR-4677-3p
hsa-miR-4677-5p	6.32984	-0.238829	0.52499	-0.427599	0.668943		miR-4677-5p
hsa-miR-4685-3p	2.44418	0.28304	0.644744	0.446831	0.654997		miR-4685-3p
hsa-miR-4690-3p	2.99089	0.226442	0.644262	0.356879	0.721183		miR-4690-3p
hsa-miR-4705	5.45033	-1.6167	0.569088	-2.66156	0.00777804		miR-4705
hsa-miR-4709-3p	5.50692	0.248642	0.535465	0.458714	0.64644		miR-4709-3p
hsa-miR-4709-5p	2.3637	-0.913218	0.643311	-1.35112	0.176658		miR-4709-5p
hsa-miR-4714-3p	5.20838	-0.285016	0.590309	-0.487567	0.625856		miR-4714-3p
hsa-miR-4725-3p	6.64614	0.149818	0.559228	0.267407	0.789156		miR-4725-3p
hsa-miR-4728-3p	3.50222	0.470468	0.627396	0.780861	0.434884		miR-4728-3p
hsa-miR-4731-3p	7.02253	-0.0368454	0.577238	-0.109406	0.91288		miR-4731-3p
hsa-miR-4731-5p	6.561	-0.0363147	0.58101	-0.0989673	0.921164		miR-4731-5p
hsa-miR-4741	2.208	0.113807	0.644836	0.178562	0.858281		miR-4741
hsa-miR-4742-3p	2.12411	0.172599	0.642962	0.257374	0.79689		miR-4742-3p
hsa-miR-4742-5p	4.28986	0.208795	0.600618	0.347486	0.728226		miR-4742-5p
hsa-miR-4746-5p	18.6029	0.513673	0.397752	1.29337	0.195883	0.527504	miR-4746-5p
hsa-miR-4747-5p	4.83157	0.340056	0.591185	0.581338	0.561013		miR-4747-5p
hsa-miR-4748	2.2871	-0.0394182	0.643873	-0.0513417	0.959053		miR-4748
hsa-miR-4762-3p	3.05365	0.263448	0.624621	0.42774	0.668841		miR-4762-3p
hsa-miR-4766-3p	12.6814	-0.268615	0.448955	-0.598527	0.549488		miR-4766-3p
hsa-miR-4775	5.12962	-0.446935	0.560461	-0.752817	0.45156		miR-4775
hsa-miR-4780	1.1624	-0.183924	0.592595	-0.338182	0.735226		miR-4780
hsa-miR-4781-3p	6.248	-0.0121479	0.531817	-0.0180519	0.985597		miR-4781-3p
hsa-miR-4787-3p	3.03295	-0.0739754	0.618494	-0.106278	0.915361		miR-4787-3p
hsa-miR-4791	5.65574	0.654341	0.548029	1.18225	0.237105		miR-4791
hsa-miR-4799-5p	3.5312	-0.371974	0.606432	-0.618543	0.536217		miR-4799-5p
hsa-miR-4804-3p	1.85261	-0.0235242	0.634554	-0.0385389	0.969258		miR-4804-3p
hsa-miR-4804-5p	20.902	0.136826	0.360441	0.379007	0.704683	0.885378	miR-4804-5p
hsa-miR-484	35.7043	0.253306	0.370427	0.684224	0.493833	0.791256	miR-484
hsa-miR-485-3p	6.24436	-0.261668	0.634527	-0.806152	0.420155		miR-485-3p
hsa-miR-486-5p	4.63726	0.517134	0.612334	0.897069	0.369682		miR-486-5p
hsa-miR-487b-3p	5.8202	0.535164	0.642252	1.24517	0.213068		miR-487b-3p
hsa-miR-489-3p	1.59676	0.915082	0.622333	1.58169	0.113721		miR-489-3p
hsa-miR-491-3p	12.4187	0.304514	0.442855	0.687018	0.492071		miR-491-3p
hsa-miR-491-5p	72.5197	0.0894367	0.242494	0.369639	0.711651	0.885378	miR-491-5p
hsa-miR-493-3p	7.95985	-0.333534	0.616481	-0.837156	0.402505		miR-493-3p
hsa-miR-493-5p	2.72676	0.550643	0.641779	1.18224	0.237109		miR-493-5p
hsa-miR-494-3p	14.1029	-0.264769	0.469877	-0.582509	0.560224		miR-494-3p
hsa-miR-497-3p	8.43324	-0.275785	0.560753	-0.505681	0.61308		miR-497-3p
hsa-miR-497-5p	742.803	0.174534	0.158118	1.10363	0.269753	0.623527	miR-497-5p
hsa-miR-4999-5p	10.8701	-0.225829	0.478357	-0.481415	0.630222		miR-4999-5p
hsa-miR-499a-5p	20.0604	0.0115547	0.367029	0.0340036	0.972874	0.99577	miR-499a-5p
hsa-miR-5000-3p	5.19869	-0.06011	0.592886	-0.0960634	0.92347		miR-5000-3p
hsa-miR-5001-3p	10.3113	0.576012	0.488685	1.17802	0.238787		miR-5001-3p
hsa-miR-5008-5p	1.48092	-1.60758	0.616201	-2.09634	0.0360518		miR-5008-5p
hsa-miR-500a-3p	559.956	0.12472	0.179079	0.69655	0.486084	0.791256	miR-500a-3p
hsa-miR-500a-5p	81.4794	0.197573	0.241489	0.818658	0.412981	0.748554	miR-500a-5p
hsa-miR-500b-3p	6.49424	-0.191095	0.550584	-0.346492	0.728973		miR-500b-3p
hsa-miR-500b-5p	3.02849	0.251632	0.629669	0.40572	0.684948		miR-500b-5p
hsa-miR-501-3p	92.9705	-0.0725842	0.224935	-0.322375	0.747169	0.922339	miR-501-3p
hsa-miR-501-5p	33.8021	-0.441648	0.332423	-1.32778	0.184251	0.503761	miR-501-5p
hsa-miR-5010-3p	3.65347	-0.296094	0.608312	-0.477755	0.632825		miR-5010-3p
hsa-miR-5010-5p	3.05717	-0.227021	0.621148	-0.365807	0.714509		miR-5010-5p
hsa-miR-502-3p	184.736	0.013935	0.174974	0.0800825	0.936172	0.987533	miR-502-3p
hsa-miR-502-5p	25.4881	-0.320306	0.343797	-0.927511	0.353661	0.70544	miR-502-5p
hsa-miR-503-3p	52.9663	0.259947	0.354277	0.727271	0.46706	0.791256	miR-503-3p
hsa-miR-503-5p	2477.91	0.166073	0.179473	0.925051	0.35494	0.70544	miR-503-5p
hsa-miR-504-5p	3.49076	-0.6624	0.635782	-1.12245	0.26167		miR-504-5p
hsa-miR-505-3p	430.48	0.202346	0.151328	1.33713	0.181182	0.500914	miR-505-3p
hsa-miR-505-5p	96.5856	0.215877	0.210923	1.02315	0.306238	0.667043	miR-505-5p
hsa-miR-506-3p	216.985	0.268002	0.20805	1.28828	0.197649	0.527504	miR-506-3p
hsa-miR-506-5p	40.5591	0.814992	0.313926	2.5929	0.00951701	0.082157	miR-506-5p
hsa-miR-507	160.179	0.247653	0.20143	1.22966	0.218823	0.543702	miR-507
hsa-miR-508-3p	8392.42	0.400452	0.160997	2.48735	0.0128697	0.101297	miR-508-3p
hsa-miR-508-5p	593.105	0.375407	0.200431	1.87301	0.061067	0.263585	miR-508-5p
hsa-miR-509-3-5p	289.303	0.485849	0.160843	3.02057	0.00252298	0.0288438	miR-509-3-5p
hsa-miR-509-3p	1939.44	0.239004	0.192741	1.24003	0.214963	0.543702	miR-509-3p
hsa-miR-509-5p	427.962	0.512239	0.142718	3.58907	0.000331854	0.00610323	miR-509-5p
hsa-miR-5091	3.29998	0.536724	0.625031	0.847742	0.396582		miR-5091
hsa-miR-510-3p	77.1845	0.457045	0.224453	2.03595	0.0417549	0.217274	miR-510-3p
hsa-miR-510-5p	475.066	0.574437	0.189152	3.03688	0.00239042	0.0281625	miR-510-5p
hsa-miR-513a-3p	15.5607	-0.154253	0.380763	-0.394526	0.693193	0.885378	miR-513a-3p
hsa-miR-513a-5p	1067.81	0.706933	0.193591	3.65178	0.000260431	0.00524582	miR-513a-5p
hsa-miR-513b-3p	50.537	-0.0605726	0.326425	-0.183422	0.854467	0.96734	miR-513b-3p
hsa-miR-513b-5p	1023.14	0.72352	0.159169	4.54567	5.47617e-06	0.000144776	miR-513b-5p
hsa-miR-513c-3p	15.7851	0.0196587	0.382217	0.0551075	0.956053	0.99577	miR-513c-3p
hsa-miR-513c-5p	4793.74	0.551034	0.179216	3.07481	0.00210636	0.0262056	miR-513c-5p
hsa-miR-514a-3p	3784.67	0.339685	0.166556	2.03944	0.0414059	0.217274	miR-514a-3p
hsa-miR-514a-5p	509.903	0.188369	0.15001	1.25582	0.209181	0.536264	miR-514a-5p
hsa-miR-514b-3p	60.1657	0.196773	0.266826	0.737639	0.460734	0.790144	miR-514b-3p
hsa-miR-514b-5p	732.652	0.42632	0.211567	2.01504	0.0439001	0.223732	miR-514b-5p
hsa-miR-5187-5p	9.12876	0.211597	0.498254	0.424536	0.671175		miR-5187-5p
hsa-miR-532-3p	1027.06	0.276903	0.272922	1.01457	0.310313	0.667043	miR-532-3p
hsa-miR-532-5p	7355.43	0.0951904	0.129146	0.737078	0.461075	0.790144	miR-532-5p
hsa-miR-542-3p	1515.07	0.156906	0.269249	0.583117	0.559814	0.832945	miR-542-3p
hsa-miR-542-5p	123.758	0.341789	0.24746	1.38054	0.16742	0.478506	miR-542-5p
hsa-miR-545-3p	21.9744	-0.547207	0.440257	-1.22951	0.218881	0.543702	miR-545-3p
hsa-miR-545-5p	52.2909	0.175116	0.359027	0.487911	0.625613	0.850017	miR-545-5p
hsa-miR-548a-3p	113.058	0.011944	0.28939	0.0425281	0.966078	0.99577	miR-548a-3p
hsa-miR-548a-5p	7.21376	0.361586	0.534382	0.672135	0.501498		miR-548a-5p
hsa-miR-548ad-5p	1.77566	0.717477	0.644489	1.07053	0.28438		miR-548ad-5p
hsa-miR-548aw	7.53136	0.222377	0.514766	0.431797	0.665889		miR-548aw
hsa-miR-548ay-3p	9.21484	0.276402	0.519334	0.533495	0.593691		miR-548ay-3p
hsa-miR-548b-3p	6.32647	1.0243	0.561107	1.79222	0.0730976		miR-548b-3p
hsa-miR-548d-3p	2.43904	0.357796	0.639309	0.560324	0.575259		miR-548d-3p
hsa-miR-548e-3p	19.8766	0.188937	0.360266	0.525137	0.599488	0.834156	miR-548e-3p
hsa-miR-548e-5p	33.1361	-0.201322	0.306033	-0.657923	0.510587	0.80589	miR-548e-5p
hsa-miR-548j-5p	57.58	-0.0398896	0.279722	-0.149218	0.881382	0.973439	miR-548j-5p
hsa-miR-548k	13.9613	-0.327456	0.412563	-0.795986	0.42604		miR-548k
hsa-miR-548l	2.41947	0.224292	0.641629	0.369478	0.711772		miR-548l
hsa-miR-548n	14.701	0.0111518	0.45611	0.0275791	0.977998	0.99577	miR-548n
hsa-miR-548o-3p	4.19923	0.336965	0.595442	0.566267	0.571212		miR-548o-3p
hsa-miR-548u	3.23865	-0.306893	0.631096	-0.48435	0.628138		miR-548u
hsa-miR-549a-3p	2.28443	-1.45735	0.640607	-1.9361	0.052855		miR-549a-3p
hsa-miR-550a-3p	2.61922	-0.189352	0.629809	-0.273545	0.784435		miR-550a-3p
hsa-miR-550a-5p	3.49779	-0.097149	0.619312	-0.152393	0.878877		miR-550a-5p
hsa-miR-551b-3p	15.0954	-0.476879	0.411563	-1.13766	0.255261	0.593272	miR-551b-3p
hsa-miR-561-3p	56.9858	-0.180649	0.288804	-0.632731	0.52691	0.81642	miR-561-3p
hsa-miR-561-5p	461.608	0.0180619	0.204691	0.0875096	0.930266	0.987068	miR-561-5p
hsa-miR-5690	6.68843	-0.253575	0.562047	-0.448968	0.653455		miR-5690
hsa-miR-5695	2.7886	-0.64213	0.639052	-1.00072	0.316961		miR-5695
hsa-miR-5696	2.80516	-0.0612395	0.630604	-0.0897274	0.928504		miR-5696
hsa-miR-5697	5.61436	0.341949	0.557383	0.613619	0.539467		miR-5697
hsa-miR-5699-3p	98.2477	-0.154684	0.211843	-0.727387	0.466989	0.791256	miR-5699-3p
hsa-miR-5699-5p	110.324	0.194359	0.211399	0.920144	0.357497	0.706642	miR-5699-5p
hsa-miR-570-3p	36.1097	-0.0377967	0.336052	-0.11034	0.91214	0.982581	miR-570-3p
hsa-miR-573	6.23582	-0.21881	0.539083	-0.374721	0.707868		miR-573
hsa-miR-574-3p	4267.29	0.365863	0.185622	1.97145	0.048672	0.231329	miR-574-3p
hsa-miR-574-5p	27.3099	0.439754	0.417006	1.06161	0.288412	0.648927	miR-574-5p
hsa-miR-576-5p	108.314	-0.203623	0.216209	-0.941216	0.346594	0.69814	miR-576-5p
hsa-miR-577	239.441	0.275845	0.258864	1.0654	0.286694	0.648511	miR-577
hsa-miR-579-3p	6.33162	0.308002	0.567786	0.537934	0.590622		miR-579-3p
hsa-miR-579-5p	4.73643	-0.500975	0.572726	-0.843977	0.398682		miR-579-5p
hsa-miR-580-3p	8.58996	-0.216755	0.514912	-0.413743	0.679062		miR-580-3p
hsa-miR-582-3p	316.238	0.0721446	0.159497	0.452308	0.651047	0.868748	miR-582-3p
hsa-miR-582-5p	271.167	0.315677	0.196595	1.6057	0.10834	0.369579	miR-582-5p
hsa-miR-584-3p	53.051	-0.797459	0.2766	-2.88783	0.00387905	0.0410209	miR-584-3p
hsa-miR-584-5p	2407.16	-0.595318	0.171602	-3.46975	0.000520938	0.00816136	miR-584-5p
hsa-miR-589-3p	101.109	0.345202	0.221349	1.55944	0.118892	0.389854	miR-589-3p
hsa-miR-589-5p	165.213	-0.117425	0.169533	-0.69282	0.488422	0.791256	miR-589-5p
hsa-miR-590-3p	2512.64	0.0047748	0.201642	0.0237451	0.981056	0.99577	miR-590-3p
hsa-miR-590-5p	410.258	-0.25967	0.266686	-0.972691	0.330707	0.679073	miR-590-5p
hsa-miR-597-3p	6.99566	-0.550934	0.531117	-1.03879	0.298903		miR-597-3p
hsa-miR-597-5p	3.78033	-0.748528	0.611681	-1.12473	0.260705		miR-597-5p
hsa-miR-598-3p	668.082	-0.0538205	0.172034	-0.312787	0.754442	0.922339	miR-598-3p
hsa-miR-599	2.63322	0.394979	0.637786	0.570271	0.568494		miR-599
hsa-miR-615-3p	2051.42	0.437008	0.143942	3.03607	0.00239681	0.0281625	miR-615-3p
hsa-miR-615-5p	26.1693	0.294122	0.411807	0.713959	0.475252	0.791256	miR-615-5p
hsa-miR-616-3p	3.36911	0.337964	0.611459	0.555553	0.578516		miR-616-3p
hsa-miR-616-5p	8.65297	0.460494	0.481411	0.952115	0.341039		miR-616-5p
hsa-miR-624-3p	6.24998	-0.375231	0.560641	-0.647088	0.517575		miR-624-3p
hsa-miR-624-5p	34.3013	-0.176276	0.334214	-0.52615	0.598784	0.834156	miR-624-5p
hsa-miR-625-3p	10.3604	-0.198387	0.483798	-0.412176	0.680211		miR-625-3p
hsa-miR-625-5p	14.3896	-0.355715	0.42196	-0.838331	0.401845		miR-625-5p
hsa-miR-627-3p	12.0349	-0.102797	0.454123	-0.223355	0.823259		miR-627-3p
hsa-miR-627-5p	104.294	0.26124	0.240214	1.08757	0.276783	0.629458	miR-627-5p
hsa-miR-628-3p	156.845	0.348548	0.223203	1.56155	0.118395	0.389854	miR-628-3p
hsa-miR-628-5p	99.4002	0.0549925	0.223369	0.246371	0.805395	0.951626	miR-628-5p
hsa-miR-629-3p	19.9655	-0.607445	0.400555	-1.52743	0.126654	0.408966	miR-629-3p
hsa-miR-629-5p	1184.99	-0.271718	0.150993	-1.79995	0.071868	0.295147	miR-629-5p
hsa-miR-636	4.22817	-0.24747	0.582633	-0.41588	0.677498		miR-636
hsa-miR-641	29.5143	-0.445954	0.311673	-1.42702	0.153575	0.45748	miR-641
hsa-miR-642a-3p	9.53557	0.13005	0.506789	0.256678	0.797427		miR-642a-3p
hsa-miR-642a-5p	127.007	0.353947	0.277446	1.2755	0.202133	0.529182	miR-642a-5p
hsa-miR-643	11.6734	-0.0826978	0.446685	-0.179838	0.857279		miR-643
hsa-miR-6505-5p	5.873	0.492774	0.54436	0.905011	0.36546		miR-6505-5p
hsa-miR-6507-3p	1.4784	-0.0198701	0.633946	-0.0246803	0.98031		miR-6507-3p
hsa-miR-6507-5p	17.2471	0.537722	0.391165	1.37108	0.17035	0.483436	miR-6507-5p
hsa-miR-651-5p	41.6059	-0.493778	0.279691	-1.75931	0.0785255	0.311963	miR-651-5p
hsa-miR-6511b-3p	8.03608	-0.0825402	0.512333	-0.164072	0.869674		miR-6511b-3p
hsa-miR-6513-3p	23.7247	-0.15639	0.363052	-0.432917	0.665075	0.879146	miR-6513-3p
hsa-miR-6513-5p	3.78309	0.242965	0.593231	0.407791	0.683427		miR-6513-5p
hsa-miR-6514-3p	3.70691	0.573164	0.614534	0.938032	0.348228		miR-6514-3p
hsa-miR-6514-5p	8.92907	0.266786	0.509559	0.5239	0.600348		miR-6514-5p
hsa-miR-6516-3p	10.1718	-0.310311	0.492491	-0.616453	0.537596		miR-6516-3p
hsa-miR-6516-5p	2.23407	0.057288	0.643067	0.0901421	0.928174		miR-6516-5p
hsa-miR-652-3p	104.167	-0.167528	0.24018	-0.6974	0.485553	0.791256	miR-652-3p
hsa-miR-652-5p	16.5854	-0.386007	0.430005	-0.891391	0.37272	0.723213	miR-652-5p
hsa-miR-653-3p	1.74514	0.428732	0.635713	0.63114	0.527949		miR-653-3p
hsa-miR-654-3p	15.0853	0	0.632322	0	1	1	miR-654-3p
hsa-miR-659-5p	3.46016	-0.117132	0.595792	-0.177276	0.859291		miR-659-5p
hsa-miR-660-3p	12.238	-0.340872	0.461852	-0.725865	0.467921		miR-660-3p
hsa-miR-660-5p	3669.52	0.00389565	0.136561	0.0285897	0.977192	0.99577	miR-660-5p
hsa-miR-663a	2.72285	0.0375242	0.623767	0.0639011	0.949049		miR-663a
hsa-miR-664a-3p	30.4607	-0.195957	0.42127	-0.462633	0.643627	0.861564	miR-664a-3p
hsa-miR-664a-5p	160.191	0.342284	0.197986	1.72875	0.0838535	0.312116	miR-664a-5p
hsa-miR-664b-3p	4.88712	0.225437	0.579935	0.389962	0.696565		miR-664b-3p
hsa-miR-664b-5p	18.605	0.222722	0.408687	0.543459	0.586814	0.834156	miR-664b-5p
hsa-miR-670-3p	1.96097	0.53501	0.643151	0.714067	0.475185		miR-670-3p
hsa-miR-671-3p	50.6591	-0.645409	0.380036	-1.69573	0.0899373	0.324523	miR-671-3p
hsa-miR-671-5p	625.797	-0.528275	0.182273	-2.89789	0.00375686	0.0407474	miR-671-5p
hsa-miR-6716-3p	8.87108	-0.477673	0.551865	-0.880626	0.37852		miR-6716-3p
hsa-miR-6720-3p	18.4825	0.971468	0.401917	2.41984	0.0155273	0.115229	miR-6720-3p
hsa-miR-6720-5p	3.6541	0.803041	0.599764	1.2933	0.195908		miR-6720-5p
hsa-miR-6726-3p	4.82248	0.448283	0.563851	0.792869	0.427854		miR-6726-3p
hsa-miR-6731-3p	5.7091	-0.435764	0.536646	-0.790472	0.429252		miR-6731-3p
hsa-miR-6731-5p	8.54128	0.367406	0.507974	0.721264	0.470747		miR-6731-5p
hsa-miR-6733-3p	3.22937	-1.37104	0.642262	-2.68287	0.00729926		miR-6733-3p
hsa-miR-6733-5p	3.25559	-0.618311	0.637615	-1.04393	0.296518		miR-6733-5p
hsa-miR-6734-3p	2.64023	-0.0640912	0.636015	-0.0980684	0.921878		miR-6734-3p
hsa-miR-6734-5p	8.82239	-0.0345594	0.519153	-0.0699223	0.944256		miR-6734-5p
hsa-miR-6739-3p	1.26945	0.881297	0.597668	1.50352	0.132704		miR-6739-3p
hsa-miR-6747-3p	8.7582	0.459156	0.537525	0.862503	0.388411		miR-6747-3p
hsa-miR-6750-5p	4.53555	-0.362036	0.610618	-0.569368	0.569107		miR-6750-5p
hsa-miR-676-3p	8.10247	0.595727	0.538556	1.10407	0.269564		miR-676-3p
hsa-miR-6764-5p	3.23289	0.0907995	0.626424	0.147524	0.882718		miR-6764-5p
hsa-miR-6767-5p	2.49431	0.654083	0.640061	0.99796	0.318299		miR-6767-5p
hsa-miR-6769b-3p	7.7341	0.193678	0.517858	0.374295	0.708185		miR-6769b-3p
hsa-miR-6772-3p	2.58761	-0.851502	0.637651	-1.26855	0.204602		miR-6772-3p
hsa-miR-6775-3p	1.48654	1.06472	0.629158	1.53493	0.124801		miR-6775-3p
hsa-miR-6777-5p	1.99675	0.862824	0.63919	1.4178	0.156248		miR-6777-5p
hsa-miR-6779-5p	1.73539	-0.075147	0.624737	-0.18996	0.849341		miR-6779-5p
hsa-miR-6782-3p	1.53892	-0.799247	0.624646	-1.45415	0.145906		miR-6782-3p
hsa-miR-6783-3p	1.38318	-0.829824	0.634709	-1.20814	0.226995		miR-6783-3p
hsa-miR-6786-3p	3.63185	0.998951	0.610655	1.62982	0.10314		miR-6786-3p
hsa-miR-6787-3p	2.64096	0.14503	0.644388	0.224155	0.822637		miR-6787-3p
hsa-miR-6802-3p	3.24494	0.351807	0.617019	0.575332	0.565067		miR-6802-3p
hsa-miR-6803-3p	7.48114	-0.686867	0.567057	-1.23574	0.216554		miR-6803-3p
hsa-miR-6808-3p	1.94155	0.588069	0.638125	1.20281	0.22905		miR-6808-3p
hsa-miR-6812-3p	2.54053	-0.316475	0.643775	-0.487525	0.625886		miR-6812-3p
hsa-miR-6821-5p	2.47929	-0.842561	0.640552	-1.20009	0.230102		miR-6821-5p
hsa-miR-6823-5p	9.30884	-1.15366	0.493673	-2.25184	0.0243323		miR-6823-5p
hsa-miR-6825-5p	2.78098	-0.152554	0.637719	-0.244223	0.807058		miR-6825-5p
hsa-miR-6832-5p	1.00739	-0.471802	0.57905	-1.02295	0.30633		miR-6832-5p
hsa-miR-6844	3.09588	-0.085098	0.632068	-0.109629	0.912703		miR-6844
hsa-miR-6850-5p	1.47112	-0.381611	0.611543	-0.817597	0.413587		miR-6850-5p
hsa-miR-6851-5p	3.12983	0.500253	0.636759	0.827511	0.407947		miR-6851-5p
hsa-miR-6852-5p	2.38701	0.0512897	0.641148	0.0852464	0.932066		miR-6852-5p
hsa-miR-6868-3p	5.73876	0.21804	0.585312	0.369951	0.711419		miR-6868-3p
hsa-miR-6869-5p	2.05071	0.0747339	0.644769	0.114596	0.908765		miR-6869-5p
hsa-miR-6873-3p	2.46923	-0.538538	0.632683	-0.819192	0.412677		miR-6873-3p
hsa-miR-6882-5p	4.40668	0.470336	0.60219	0.762398	0.445822		miR-6882-5p
hsa-miR-6885-3p	2.82519	0.810908	0.632517	1.26645	0.205353		miR-6885-3p
hsa-miR-6892-5p	7.00039	-0.239462	0.541834	-0.437072	0.662059		miR-6892-5p
hsa-miR-6894-5p	1.76135	-0.229796	0.64048	-0.458921	0.646291		miR-6894-5p
hsa-miR-7-1-3p	121.276	-0.039661	0.204616	-0.192162	0.847615	0.96734	miR-7-1-3p
hsa-miR-7-2-3p	3.52894	0.147858	0.63025	0.235427	0.813877		miR-7-2-3p
hsa-miR-7-5p	2453.46	-0.444955	0.190807	-2.33184	0.0197089	0.130263	miR-7-5p
hsa-miR-708-3p	6.13333	-0.028004	0.621215	-0.15781	0.874607		miR-708-3p
hsa-miR-708-5p	63.5038	0.0375383	0.359056	0.0739109	0.941081	0.988891	miR-708-5p
hsa-miR-7114-5p	1.31956	0.376521	0.60481	0.822389	0.410855		miR-7114-5p
hsa-miR-744-3p	9.60158	-0.308556	0.510338	-0.607112	0.543777		miR-744-3p
hsa-miR-744-5p	794.057	-0.0905988	0.227144	-0.398916	0.689955	0.885378	miR-744-5p
hsa-miR-760	72.9817	0.218046	0.309252	0.703916	0.481485	0.791256	miR-760
hsa-miR-765	8.30067	0.325051	0.517976	0.628871	0.529434		miR-765
hsa-miR-766-3p	6.56443	-0.540523	0.594978	-0.894182	0.371224		miR-766-3p
hsa-miR-766-5p	9.34815	-0.422904	0.494758	-0.847459	0.396739		miR-766-5p
hsa-miR-769-3p	69.3358	0.151886	0.255608	0.593806	0.552642	0.832308	miR-769-3p
hsa-miR-769-5p	421.923	-0.043986	0.166516	-0.264225	0.791607	0.945903	miR-769-5p
hsa-miR-7706	27.5748	-0.954544	0.382184	-2.50492	0.0122478	0.101297	miR-7706
hsa-miR-7851-3p	3.92314	-0.664855	0.619294	-1.05608	0.29093		miR-7851-3p
hsa-miR-7974	4.94885	-1.35855	0.582326	-2.20303	0.0275928		miR-7974
hsa-miR-7976	84.8859	0.411529	0.243122	1.69261	0.0905289	0.324523	miR-7976
hsa-miR-7977	12.2511	-0.315347	0.458191	-0.697994	0.485181		miR-7977
hsa-miR-802	5.67679	0.640474	0.538245	1.15642	0.247509		miR-802
hsa-miR-873-3p	53.6683	-0.171491	0.307079	-0.558768	0.57632	0.833652	miR-873-3p
hsa-miR-873-5p	211.052	-0.717687	0.19925	-3.59822	0.000320397	0.00610323	miR-873-5p
hsa-miR-874-3p	86.7537	-0.0941047	0.257965	-0.373824	0.708535	0.885378	miR-874-3p
hsa-miR-874-5p	21.4634	0.104273	0.419852	0.235252	0.814013	0.955698	miR-874-5p
hsa-miR-876-3p	4.71133	-0.708833	0.607995	-1.09892	0.271803		miR-876-3p
hsa-miR-876-5p	12.5211	-1.20355	0.451435	-2.60252	0.00925411		miR-876-5p
hsa-miR-877-3p	3.35084	-0.216419	0.61758	-0.332958	0.739166		miR-877-3p
hsa-miR-877-5p	188.993	0.219347	0.213629	1.02629	0.304755	0.667043	miR-877-5p
hsa-miR-887-3p	307.082	0.0262481	0.182516	0.1443	0.885264	0.975173	miR-887-3p
hsa-miR-887-5p	20.9678	0.657771	0.379891	1.72729	0.0841164	0.312116	miR-887-5p
hsa-miR-888-5p	18.6997	-0.246335	0.644568	-0.38898	0.697291	0.885378	miR-888-5p
hsa-miR-891a-5p	25.7311	-0.5376	0.644409	-1.01038	0.312313	0.667043	miR-891a-5p
hsa-miR-891b	5.61551	-0.195697	0.631052	-0.307896	0.758161		miR-891b
hsa-miR-892a	13.7514	-0.181597	0.632266	-0.30057	0.763743		miR-892a
hsa-miR-892b	5.70843	0.136751	0.612658	0.229406	0.818553		miR-892b
hsa-miR-9-3p	13.4101	-0.307802	0.391443	-0.767003	0.44308		miR-9-3p
hsa-miR-9-5p	214.633	0.246267	0.175243	1.40577	0.159792	0.467501	miR-9-5p
hsa-miR-92a-1-5p	7.9811	-0.0568721	0.500971	-0.10344	0.917614		miR-92a-1-5p
hsa-miR-92a-2-5p	3.94189	0.0415052	0.626389	0.0511128	0.959236		miR-92a-2-5p
hsa-miR-92a-3p	5216.92	0.00078697	0.173542	0.00455103	0.996369	0.99873	miR-92a-3p
hsa-miR-92b-3p	163.736	-0.483968	0.228958	-2.1116	0.0347208	0.190802	miR-92b-3p
hsa-miR-92b-5p	84.9635	-0.42975	0.247899	-1.73423	0.0828768	0.312116	miR-92b-5p
hsa-miR-93-3p	205.792	0.116185	0.1918	0.605986	0.544524	0.828539	miR-93-3p
hsa-miR-93-5p	129808	0.366399	0.136729	2.67974	0.00736784	0.0663106	miR-93-5p
hsa-miR-933	4.93773	-0.69464	0.584988	-1.14431	0.252497		miR-933
hsa-miR-937-3p	12.7701	-0.315145	0.474749	-0.670439	0.502578		miR-937-3p
hsa-miR-937-5p	1.89266	-0.0887307	0.641946	-0.114344	0.908965		miR-937-5p
hsa-miR-939-5p	2.42903	0.2649	0.642746	0.413627	0.679147		miR-939-5p
hsa-miR-940	2.85214	0.232607	0.634409	0.365499	0.714739		miR-940
hsa-miR-941	65.8879	0.134189	0.303554	0.440983	0.659225	0.874145	miR-941
hsa-miR-942-5p	162.858	0.351132	0.198356	1.77022	0.0766904	0.308953	miR-942-5p
hsa-miR-943	5.02173	0.697499	0.563484	1.18803	0.234821		miR-943
hsa-miR-95-3p	14.1403	-0.22206	0.3984	-0.54887	0.583095		miR-95-3p
hsa-miR-96-5p	2.49051	-0.969042	0.638892	-1.50723	0.131751		miR-96-5p
hsa-miR-98-3p	112.431	0.0117845	0.25321	0.0459421	0.963356	0.99577	miR-98-3p
hsa-miR-98-5p	3512.98	-0.0688633	0.183934	-0.374385	0.708118	0.885378	miR-98-5p
hsa-miR-9903	9.01826	-0.566236	0.528256	-1.10359	0.269771		miR-9903
hsa-miR-9985	29.8267	-0.104621	0.374584	-0.305435	0.760035	0.924107	miR-9985
hsa-miR-99a-3p	55.0666	0.510547	0.27675	1.8452	0.0650087	0.272264	miR-99a-3p
hsa-miR-99a-5p	494.839	0.200968	0.199468	1.00726	0.31381	0.667043	miR-99a-5p
hsa-miR-99b-3p	1654.69	0.261445	0.115438	2.26476	0.0235272	0.146353	miR-99b-3p
hsa-miR-99b-5p	31488.6	0.159798	0.11944	1.3379	0.18093	0.500914	miR-99b-5p

## Sheet: miR TPAfree vs TPAfreeDox
id	baseMean	log2FoldChange	lfcSE	stat	pvalue	padj	gene_name
hsa-let-7a-2-3p	60.1212	-1.00247	0.252722	-3.94223	8.0726e-05	0.00126678	let-7a-2-3p
hsa-let-7a-3p	442.214	-0.410548	0.214678	-1.91207	0.0558678	0.155062	let-7a-3p
hsa-let-7a-5p	83333.4	0.0922711	0.154589	0.596867	0.550596	0.71771	let-7a-5p
hsa-let-7b-3p	106.089	-0.0424745	0.213899	-0.19662	0.844125	0.920675	let-7b-3p
hsa-let-7b-5p	45409.6	0.525261	0.149952	3.50277	0.000460449	0.00383394	let-7b-5p
hsa-let-7c-3p	37.0709	0.542507	0.329638	1.64161	0.100671	0.232386	let-7c-3p
hsa-let-7c-5p	4550.39	0.715739	0.171118	4.18221	2.88686e-05	0.000535381	let-7c-5p
hsa-let-7d-3p	1366.28	0.71617	0.156156	4.58585	4.52148e-06	0.000122984	let-7d-3p
hsa-let-7d-5p	9542.31	0.37602	0.139864	2.68846	0.00717823	0.0332809	let-7d-5p
hsa-let-7e-3p	78.0039	0.349486	0.242779	1.43929	0.150067	0.307675	let-7e-3p
hsa-let-7e-5p	67956.1	0.173864	0.132708	1.31012	0.190156	0.357529	let-7e-5p
hsa-let-7f-1-3p	135.644	-0.469335	0.220031	-2.13099	0.0330897	0.107148	let-7f-1-3p
hsa-let-7f-2-3p	150.126	-0.70388	0.272506	-2.58348	0.00978086	0.043376	let-7f-2-3p
hsa-let-7f-5p	152107	-0.0352527	0.16916	-0.208399	0.834918	0.913261	let-7f-5p
hsa-let-7g-3p	81.08	-0.115892	0.240335	-0.485041	0.627648	0.769816	let-7g-3p
hsa-let-7g-5p	56452.4	0.0419752	0.130459	0.321751	0.747641	0.861893	let-7g-5p
hsa-let-7i-3p	2150.56	-0.313575	0.181401	-1.72917	0.0837788	0.209798	let-7i-3p
hsa-let-7i-5p	640959	-0.116732	0.183886	-0.634869	0.525514	0.702983	let-7i-5p
hsa-miR-1-3p	34.7214	-0.904113	0.618773	-1.38117	0.167225	0.326449	miR-1-3p
hsa-miR-100-3p	964.303	-1.58659	0.431528	-3.63561	0.00027732	0.00263131	miR-100-3p
hsa-miR-100-5p	8925.78	-0.937386	0.185062	-5.06394	4.10678e-07	1.52324e-05	miR-100-5p
hsa-miR-101-2-5p	9.13263	-0.0517165	0.510468	-0.115279	0.908224		miR-101-2-5p
hsa-miR-101-3p	14006.3	-0.489302	0.189743	-2.57945	0.00989588	0.0434142	miR-101-3p
hsa-miR-101-5p	18.9185	0.172018	0.436411	0.386843	0.698872	0.826605	miR-101-5p
hsa-miR-10393-3p	1.48569	1.04334	0.62201	1.71177	0.0869386		miR-10393-3p
hsa-miR-10395-3p	17.6337	0.656371	0.466945	1.40392	0.160343	0.320686	miR-10395-3p
hsa-miR-10395-5p	92.7852	1.27319	0.291092	4.36513	1.27047e-05	0.000259177	miR-10395-5p
hsa-miR-10397-5p	3.07511	1.02541	0.626577	1.61766	0.105735		miR-10397-5p
hsa-miR-10399-3p	3.53256	-0.679619	0.621823	-1.11718	0.263916		miR-10399-3p
hsa-miR-10399-5p	6.38645	0.168814	0.578952	0.289625	0.772103		miR-10399-5p
hsa-miR-103a-1-5p	4.58138	0.130182	0.570821	0.229204	0.81871		miR-103a-1-5p
hsa-miR-103a-2-5p	12.174	-0.0156956	0.450612	-0.0367633	0.970674		miR-103a-2-5p
hsa-miR-103a-3p	28846.1	0.101499	0.131426	0.772296	0.439939	0.627605	miR-103a-3p
hsa-miR-10523-5p	4.87185	-1.09695	0.606384	-1.84596	0.0648975		miR-10523-5p
hsa-miR-10526-3p	3.17469	-0.473628	0.642098	-0.611731	0.540716		miR-10526-3p
hsa-miR-106a-3p	206.021	-0.465315	0.165865	-2.80178	0.00508222	0.0265839	miR-106a-3p
hsa-miR-106a-5p	12.8265	0.342839	0.438044	0.77913	0.435903		miR-106a-5p
hsa-miR-106b-3p	597.06	0.153532	0.150927	1.01721	0.309052	0.502363	miR-106b-3p
hsa-miR-106b-5p	312.806	-0.343735	0.17699	-1.9438	0.0519194	0.148903	miR-106b-5p
hsa-miR-107	3381.7	0.146834	0.160694	0.91375	0.360848	0.557674	miR-107
hsa-miR-10a-3p	544.52	-0.244416	0.143652	-1.70165	0.0888201	0.21452	miR-10a-3p
hsa-miR-10a-5p	6424.87	-0.0597012	0.127793	-0.467206	0.640352	0.775263	miR-10a-5p
hsa-miR-10b-3p	742.117	-0.105554	0.132783	-0.795168	0.426516	0.619283	miR-10b-3p
hsa-miR-10b-5p	9970.28	0.00084288	0.14743	0.00569778	0.995454	0.9979	miR-10b-5p
hsa-miR-1179	5.63435	0.66608	0.59904	1.09882	0.271847		miR-1179
hsa-miR-1180-3p	78.3002	0.637855	0.255796	2.49309	0.0126636	0.0501625	miR-1180-3p
hsa-miR-1185-1-3p	2.72693	-0.731115	0.644395	-0.904179	0.365901		miR-1185-1-3p
hsa-miR-12114	4.05596	0.52288	0.629647	0.79483	0.426712		miR-12114
hsa-miR-12135	3.74382	-1.3114	0.638409	-2.25938	0.0238595		miR-12135
hsa-miR-12136	20.6993	1.02288	0.37186	2.71917	0.00654451	0.0314137	miR-12136
hsa-miR-122-5p	48.7511	0.319088	0.363612	0.882519	0.377496	0.574696	miR-122-5p
hsa-miR-1226-3p	82.1529	0.338407	0.254567	1.32909	0.183818	0.350457	miR-1226-3p
hsa-miR-1227-3p	3.7979	-0.0286329	0.631578	-0.044063	0.964854		miR-1227-3p
hsa-miR-1228-3p	4.89723	0.562005	0.576629	0.95143	0.341386		miR-1228-3p
hsa-miR-1228-5p	3.85584	0.856287	0.614656	1.30915	0.190484		miR-1228-5p
hsa-miR-1229-3p	10.2932	1.22267	0.498686	2.40832	0.0160259		miR-1229-3p
hsa-miR-1237-3p	4.26452	0.769777	0.622786	1.2289	0.219111		miR-1237-3p
hsa-miR-1248	2647.23	1.37748	0.423913	3.24236	0.00118546	0.0086369	miR-1248
hsa-miR-1249-3p	35.7542	0.980903	0.34878	2.81165	0.00492883	0.0261164	miR-1249-3p
hsa-miR-1250-5p	4.7532	-0.101847	0.572912	-0.174564	0.861422		miR-1250-5p
hsa-miR-1252-5p	2.16708	-0.611492	0.644426	-0.831665	0.405598		miR-1252-5p
hsa-miR-1255a	5.68913	-0.871175	0.596539	-1.48647	0.137155		miR-1255a
hsa-miR-125a-3p	288.45	0.32113	0.153756	2.08857	0.0367462	0.114912	miR-125a-3p
hsa-miR-125a-5p	122029	0.662886	0.199401	3.32421	0.000886706	0.00669955	miR-125a-5p
hsa-miR-125b-1-3p	47.7319	-0.411647	0.286007	-1.42718	0.153528	0.311639	miR-125b-1-3p
hsa-miR-125b-2-3p	6.79351	0.600022	0.569983	1.06621	0.286329		miR-125b-2-3p
hsa-miR-125b-5p	73209.9	-0.439091	0.153136	-2.867	0.00414389	0.0228474	miR-125b-5p
hsa-miR-126-3p	12731.3	-0.150422	0.165423	-0.909308	0.363187	0.559172	miR-126-3p
hsa-miR-126-5p	2465.75	-0.524585	0.172317	-3.04451	0.00233059	0.0150934	miR-126-5p
hsa-miR-1262	59.4573	-0.294669	0.274635	-1.06766	0.285672	0.483503	miR-1262
hsa-miR-1264	2.38787	0.147661	0.636685	0.28161	0.778243		miR-1264
hsa-miR-1269a	3.17529	-0.800952	0.631972	-1.11455	0.265045		miR-1269a
hsa-miR-127-3p	46.1429	0.431449	0.251461	1.71017	0.0872353	0.213268	miR-127-3p
hsa-miR-127-5p	1.86094	-0.407123	0.644449	-0.520739	0.602549		miR-127-5p
hsa-miR-1271-5p	168.212	0.403674	0.238263	1.69432	0.0902041	0.214919	miR-1271-5p
hsa-miR-1275	3.13397	0.167246	0.632189	0.263465	0.792192		miR-1275
hsa-miR-1276	2.29364	-1.08504	0.643113	-1.64501	0.0999688		miR-1276
hsa-miR-1277-3p	91.5654	-0.51786	0.495088	-1.05949	0.289379	0.483503	miR-1277-3p
hsa-miR-1277-5p	16.4507	-0.240132	0.409525	-0.584828	0.558663		miR-1277-5p
hsa-miR-1278	17.6447	-0.701897	0.391679	-1.77812	0.0753839	0.195902	miR-1278
hsa-miR-128-1-5p	33.0187	0.361544	0.318482	1.13518	0.2563	0.45664	miR-128-1-5p
hsa-miR-128-3p	11784.6	-0.0893102	0.123535	-0.722962	0.469703	0.654753	miR-128-3p
hsa-miR-1286	3.55321	-0.318334	0.630187	-0.580585	0.56152		miR-1286
hsa-miR-1287-5p	77.3971	0.32364	0.246286	1.31369	0.188951	0.356908	miR-1287-5p
hsa-miR-129-1-3p	11.2397	0.539434	0.498739	1.05385	0.291953		miR-129-1-3p
hsa-miR-129-2-3p	4.66053	1.12635	0.629949	2.09815	0.0358915		miR-129-2-3p
hsa-miR-129-5p	123.577	0.929724	0.210189	4.41912	9.91031e-06	0.000212811	miR-129-5p
hsa-miR-1291	1287.3	1.42481	0.275681	5.16573	2.39498e-07	1.07683e-05	miR-1291
hsa-miR-1292-5p	48.8144	0.451649	0.275632	1.63818	0.101384	0.232386	miR-1292-5p
hsa-miR-1294	5.35022	-0.12202	0.551751	-0.211908	0.832179		miR-1294
hsa-miR-1296-5p	170.322	0.747657	0.251727	2.96878	0.00298985	0.0184827	miR-1296-5p
hsa-miR-1297	4.00019	-0.192837	0.588553	-0.319225	0.749556		miR-1297
hsa-miR-1298-5p	1.58538	0	0.432766	0	1		miR-1298-5p
hsa-miR-1301-3p	798.902	0.406066	0.17349	2.34058	0.0192539	0.0671417	miR-1301-3p
hsa-miR-1304-5p	1.99379	0.27131	0.644604	0.389696	0.696761		miR-1304-5p
hsa-miR-1305	5.33804	0.300016	0.611058	0.49068	0.623653		miR-1305
hsa-miR-1306-3p	3.33963	1.24638	0.628255	1.96186	0.0497784		miR-1306-3p
hsa-miR-1306-5p	106.599	1.31924	0.335209	3.92498	8.67369e-05	0.00129672	miR-1306-5p
hsa-miR-1307-3p	1034.02	0.190001	0.179218	1.06018	0.289062	0.483503	miR-1307-3p
hsa-miR-1307-5p	396.507	-0.000240253	0.217469	-0.0024718	0.998028	0.998028	miR-1307-5p
hsa-miR-130a-3p	34557.1	-0.36402	0.176591	-2.06125	0.0392787	0.119595	miR-130a-3p
hsa-miR-130a-5p	66.3819	-0.715426	0.342586	-2.08046	0.0374837	0.114988	miR-130a-5p
hsa-miR-130b-3p	7356.93	-0.442368	0.161314	-2.74225	0.00610201	0.0298159	miR-130b-3p
hsa-miR-130b-5p	166.465	0.602868	0.208359	2.89291	0.00381685	0.0213325	miR-130b-5p
hsa-miR-132-3p	379.018	0.688758	0.224541	3.07021	0.00213908	0.0143073	miR-132-3p
hsa-miR-132-5p	42.5681	0.547069	0.355192	1.55032	0.121065	0.266997	miR-132-5p
hsa-miR-133a-3p	4.30973	0.24094	0.617181	0.365981	0.714379		miR-133a-3p
hsa-miR-134-5p	20.4318	0.279577	0.404836	0.684005	0.493972	0.671802	miR-134-5p
hsa-miR-1343-3p	4.49115	-0.0426857	0.595972	-0.0707533	0.943594		miR-1343-3p
hsa-miR-135b-3p	3.38951	-0.383124	0.621707	-0.575731	0.564797		miR-135b-3p
hsa-miR-135b-5p	192.187	-0.698038	0.240872	-2.89556	0.00378487	0.0213325	miR-135b-5p
hsa-miR-136-3p	4.76142	0.347595	0.636384	0.514714	0.606753		miR-136-3p
hsa-miR-137-3p	1199.36	-0.538179	0.180968	-2.972	0.00295869	0.0184827	miR-137-3p
hsa-miR-137-5p	12.8397	0.360853	0.439711	0.810163	0.417847		miR-137-5p
hsa-miR-138-1-3p	20.7355	0.849235	0.407108	2.08661	0.0369238	0.114912	miR-138-1-3p
hsa-miR-138-5p	772.017	0.166771	0.191597	0.870369	0.384099	0.580416	miR-138-5p
hsa-miR-139-5p	4.37928	-0.292534	0.624735	-0.515424	0.606257		miR-139-5p
hsa-miR-140-3p	8381.69	-0.0279336	0.132663	-0.210586	0.83321	0.913261	miR-140-3p
hsa-miR-140-5p	1704.44	-0.0499599	0.189575	-0.263631	0.792064	0.892768	miR-140-5p
hsa-miR-141-3p	24.823	-0.422281	0.406465	-1.06017	0.289066	0.483503	miR-141-3p
hsa-miR-142-3p	10.5747	0.157332	0.520979	0.300586	0.76373		miR-142-3p
hsa-miR-142-5p	7.91553	-0.939818	0.591399	-1.62115	0.104986		miR-142-5p
hsa-miR-143-3p	7.24057	0.562412	0.540516	1.0499	0.293766		miR-143-3p
hsa-miR-144-3p	0.531109	-0.0983908	0.42673	-0.230569	0.81765		miR-144-3p
hsa-miR-145-5p	9.3721	-0.0809333	0.479326	-0.167159	0.867245		miR-145-5p
hsa-miR-1468-5p	5.22989	0.287068	0.581553	0.475286	0.634583		miR-1468-5p
hsa-miR-146a-3p	1582.76	-0.605229	0.186594	-3.24655	0.00116812	0.0086369	miR-146a-3p
hsa-miR-146a-5p	1.11965e+06	-0.1781	0.117023	-1.52197	0.128016	0.274897	miR-146a-5p
hsa-miR-146b-3p	1.18332	0.43098	0.601023	0.715932	0.474033		miR-146b-3p
hsa-miR-146b-5p	1236.59	-0.123675	0.164116	-0.75428	0.450681	0.636305	miR-146b-5p
hsa-miR-147b-3p	3.05503	-0.0321464	0.640132	-0.062321	0.950307		miR-147b-3p
hsa-miR-148a-3p	18593.6	0.315518	0.211603	1.49107	0.135943	0.290315	miR-148a-3p
hsa-miR-148a-5p	13.2225	0.264664	0.437474	0.604897	0.545248		miR-148a-5p
hsa-miR-148b-3p	16366	-0.0796427	0.128701	-0.618825	0.536031	0.711949	miR-148b-3p
hsa-miR-148b-5p	108.67	-0.38518	0.205717	-1.87578	0.0606855	0.162893	miR-148b-5p
hsa-miR-149-5p	371.339	0.918199	0.246697	3.71863	0.000200304	0.00209549	miR-149-5p
hsa-miR-150-5p	8.80684	0.188802	0.531445	0.352876	0.724181		miR-150-5p
hsa-miR-151a-3p	18997	0.0600053	0.16091	0.372906	0.709218	0.829115	miR-151a-3p
hsa-miR-151a-5p	103.504	-0.169249	0.210676	-0.802499	0.422264	0.617505	miR-151a-5p
hsa-miR-151b	17.3394	-0.197215	0.396867	-0.499515	0.617417	0.768006	miR-151b
hsa-miR-152-3p	14618.5	-0.0854155	0.12433	-0.68699	0.492089	0.67148	miR-152-3p
hsa-miR-152-5p	10.1288	0.125903	0.486663	0.258699	0.795868		miR-152-5p
hsa-miR-1537-3p	34.2085	0.418805	0.401299	1.04959	0.293905	0.487453	miR-1537-3p
hsa-miR-1537-5p	106.295	-0.0980522	0.275751	-0.359243	0.719413	0.838631	miR-1537-5p
hsa-miR-155-5p	2649.93	-1.4691	0.159636	-9.20381	3.45484e-20	1.40958e-17	miR-155-5p
hsa-miR-15a-3p	28.5215	-0.246128	0.35812	-0.694715	0.487234	0.670688	miR-15a-3p
hsa-miR-15a-5p	10132.5	-0.295494	0.138405	-2.13508	0.0327544	0.10691	miR-15a-5p
hsa-miR-15b-3p	2739.84	-0.404265	0.20435	-1.97825	0.0479	0.139594	miR-15b-3p
hsa-miR-15b-5p	21796.9	0.0785573	0.146136	0.537566	0.590877	0.753368	miR-15b-5p
hsa-miR-16-1-3p	116.178	-0.707382	0.301162	-2.35036	0.0187554	0.0665409	miR-16-1-3p
hsa-miR-16-2-3p	244.082	-0.452571	0.191248	-2.36636	0.017964	0.0654403	miR-16-2-3p
hsa-miR-16-5p	353119	-0.0773426	0.123623	-0.625635	0.531554	0.708739	miR-16-5p
hsa-miR-17-3p	211.76	-0.251076	0.234497	-1.07292	0.283305	0.483503	miR-17-3p
hsa-miR-17-5p	2934.82	-0.120479	0.136982	-0.879597	0.379078	0.574958	miR-17-5p
hsa-miR-181a-2-3p	2743.1	0.931597	0.178136	5.22819	1.71178e-07	8.7301e-06	miR-181a-2-3p
hsa-miR-181a-3p	592.785	-0.0295088	0.184519	-0.159715	0.873105	0.930097	miR-181a-3p
hsa-miR-181a-5p	1821.17	0.241864	0.156413	1.54621	0.122054	0.267731	miR-181a-5p
hsa-miR-181b-2-3p	354.727	-0.0239278	0.186454	-0.127192	0.898789	0.940271	miR-181b-2-3p
hsa-miR-181b-3p	85.1755	-0.978722	0.254198	-3.8421	0.000121987	0.00152037	miR-181b-3p
hsa-miR-181b-5p	1557.17	0.443295	0.150302	2.94902	0.00318779	0.0191268	miR-181b-5p
hsa-miR-181c-3p	29.3217	0.246865	0.345262	0.714762	0.474756	0.658845	miR-181c-3p
hsa-miR-181c-5p	11.479	-0.173286	0.504874	-0.34718	0.728456		miR-181c-5p
hsa-miR-181d-5p	13.2362	0.417002	0.446452	0.930701	0.352008		miR-181d-5p
hsa-miR-182-5p	24.3433	-0.893837	0.380089	-2.34203	0.0191793	0.0671417	miR-182-5p
hsa-miR-183-5p	4.73414	-0.497997	0.584152	-0.83777	0.40216		miR-183-5p
hsa-miR-184	13.0301	0.782394	0.430167	1.78693	0.0739489		miR-184
hsa-miR-1843	28.943	0.652217	0.381434	1.71234	0.0868341	0.213268	miR-1843
hsa-miR-185-3p	53.3442	0.634809	0.311568	2.04035	0.0413157	0.123947	miR-185-3p
hsa-miR-185-5p	8705.33	0.136552	0.140946	0.968834	0.332628	0.528064	miR-185-5p
hsa-miR-186-3p	52.1852	-0.313141	0.294646	-1.0667	0.286107	0.483503	miR-186-3p
hsa-miR-186-5p	17979.9	-0.319293	0.153229	-2.08381	0.0371776	0.114912	miR-186-5p
hsa-miR-187-3p	57.7013	-0.20595	0.270765	-0.754222	0.450716	0.636305	miR-187-3p
hsa-miR-188-3p	13.5052	-0.585619	0.473628	-1.25398	0.209849		miR-188-3p
hsa-miR-188-5p	89.6561	-0.160602	0.229282	-0.703522	0.481731	0.666258	miR-188-5p
hsa-miR-18a-3p	27.649	0.350287	0.371427	0.944039	0.34515	0.537997	miR-18a-3p
hsa-miR-18a-5p	922.652	-0.167449	0.189336	-0.884804	0.376262	0.574696	miR-18a-5p
hsa-miR-18b-3p	9.74091	0.580084	0.470447	1.21543	0.224201		miR-18b-3p
hsa-miR-18b-5p	71.0843	0.286515	0.266725	1.07415	0.282756	0.483503	miR-18b-5p
hsa-miR-1908-3p	2.57242	0.220322	0.643095	0.330773	0.740816		miR-1908-3p
hsa-miR-1908-5p	5.80872	1.23743	0.582741	2.06735	0.038701		miR-1908-5p
hsa-miR-190a-3p	4.88993	0.0971225	0.60016	0.160529	0.872464		miR-190a-3p
hsa-miR-190a-5p	2225.8	-0.460697	0.239358	-1.92375	0.054386	0.153031	miR-190a-5p
hsa-miR-190b-5p	63.7834	-0.107617	0.26225	-0.409757	0.681984	0.815981	miR-190b-5p
hsa-miR-191-3p	271.666	-0.0134985	0.177959	-0.075353	0.939934	0.958732	miR-191-3p
hsa-miR-191-5p	128205	0.0867878	0.157907	0.5496	0.582594	0.748007	miR-191-5p
hsa-miR-1911-5p	2.66671	0.865769	0.642506	1.65288	0.098356		miR-1911-5p
hsa-miR-1914-3p	2.95944	-0.108828	0.631274	-0.151015	0.879964		miR-1914-3p
hsa-miR-1914-5p	3.47633	0.474375	0.617667	0.75398	0.450861		miR-1914-5p
hsa-miR-192-3p	22.7682	0.379218	0.399667	0.95164	0.34128	0.537376	miR-192-3p
hsa-miR-192-5p	2871.27	-0.229745	0.13537	-1.69744	0.0896143	0.214919	miR-192-5p
hsa-miR-193a-3p	24.1013	-0.238388	0.374674	-0.645416	0.518658	0.696093	miR-193a-3p
hsa-miR-193a-5p	966.555	0.126029	0.174183	0.723564	0.469333	0.654753	miR-193a-5p
hsa-miR-193b-3p	60.3345	-0.26119	0.334368	-0.777894	0.436631	0.625576	miR-193b-3p
hsa-miR-193b-5p	199.874	0.0365821	0.201297	0.18268	0.855049	0.92291	miR-193b-5p
hsa-miR-194-3p	7.11965	-0.0377549	0.552747	-0.0734654	0.941436		miR-194-3p
hsa-miR-194-5p	635.032	0.0169093	0.131933	0.127522	0.898527	0.940271	miR-194-5p
hsa-miR-195-3p	24.6626	0.0162084	0.403999	0.0440523	0.964863	0.973054	miR-195-3p
hsa-miR-195-5p	466.419	0.138388	0.164215	0.842793	0.399344	0.590335	miR-195-5p
hsa-miR-196a-3p	27.7303	-0.48168	0.351102	-1.3774	0.168389	0.327155	miR-196a-3p
hsa-miR-196a-5p	7529.1	0.201068	0.150938	1.33212	0.182822	0.350193	miR-196a-5p
hsa-miR-196b-5p	78.1093	0.071521	0.277034	0.252228	0.800865	0.892768	miR-196b-5p
hsa-miR-197-3p	376.906	0.659245	0.205627	3.20615	0.00134523	0.009629	miR-197-3p
hsa-miR-197-5p	10.2427	0.301097	0.487843	0.615844	0.537997		miR-197-5p
hsa-miR-1976	5.60044	0.204082	0.590181	0.348684	0.727327		miR-1976
hsa-miR-199a-3p	392.636	-0.442171	0.151175	-2.92293	0.0034675	0.0202105	miR-199a-3p
hsa-miR-199a-5p	8.91401	0.092878	0.489401	0.194242	0.845987		miR-199a-5p
hsa-miR-199b-5p	1520.11	-0.88059	0.164552	-5.35013	8.78908e-08	5.12278e-06	miR-199b-5p
hsa-miR-19a-3p	6675.48	-0.863248	0.230724	-3.7431	0.000181765	0.00207808	miR-19a-3p
hsa-miR-19b-1-5p	15.5129	-0.203784	0.456356	-0.464629	0.642197		miR-19b-1-5p
hsa-miR-19b-3p	12791.2	-0.607244	0.220792	-2.75084	0.00594427	0.0295764	miR-19b-3p
hsa-miR-200a-3p	21.1958	0.595789	0.382747	1.56195	0.1183	0.262317	miR-200a-3p
hsa-miR-200b-3p	16.1811	-0.936621	0.420082	-2.2295	0.0257805		miR-200b-3p
hsa-miR-200c-3p	15.2889	0.128692	0.433303	0.295724	0.767441		miR-200c-3p
hsa-miR-203a-3p	215.313	-1.03015	0.305766	-3.36332	0.000770114	0.00592842	miR-203a-3p
hsa-miR-204-5p	239.577	0.314902	0.212808	1.4798	0.138927	0.293258	miR-204-5p
hsa-miR-205-5p	3.27045	0.0326602	0.643701	0.0499396	0.960171		miR-205-5p
hsa-miR-20a-3p	195.909	-0.752556	0.215892	-3.48939	0.00048413	0.00387304	miR-20a-3p
hsa-miR-20a-5p	15675.4	-0.34843	0.126649	-2.75128	0.00593626	0.0295764	miR-20a-5p
hsa-miR-20b-5p	16503.7	-0.418627	0.147636	-2.83521	0.00457959	0.024913	miR-20b-5p
hsa-miR-21-3p	2003.21	-0.734564	0.200572	-3.66193	0.000250321	0.002491	miR-21-3p
hsa-miR-21-5p	94500.8	-0.415982	0.149501	-2.78245	0.00539499	0.0278627	miR-21-5p
hsa-miR-210-3p	1299.06	-0.298313	0.200364	-1.4885	0.136619	0.290315	miR-210-3p
hsa-miR-210-5p	1.11484	-0.739979	0.59804	-1.2391	0.215309		miR-210-5p
hsa-miR-211-3p	357.77	0.893865	0.232711	3.84836	0.000118912	0.00152037	miR-211-3p
hsa-miR-211-5p	28414.8	0.958069	0.211853	4.52546	6.02639e-06	0.000136598	miR-211-5p
hsa-miR-2110	89.6299	0.467128	0.252915	1.84687	0.0647653	0.169386	miR-2110
hsa-miR-2116-3p	48.2744	0.911375	0.26586	3.41836	0.00062999	0.004943	miR-2116-3p
hsa-miR-2116-5p	58.1913	-0.331265	0.252862	-1.30371	0.192331	0.358316	miR-2116-5p
hsa-miR-212-3p	21.3737	0.195727	0.481344	0.402751	0.687131	0.819735	miR-212-3p
hsa-miR-212-5p	6.0921	0.133085	0.627818	0.201399	0.840386		miR-212-5p
hsa-miR-215-5p	36.9311	0.0444188	0.30069	0.145468	0.884342	0.934605	miR-215-5p
hsa-miR-216a-3p	1.21389	-0.298887	0.598578	-0.621132	0.534513		miR-216a-3p
hsa-miR-216a-5p	7.79654	0.87473	0.613969	1.53247	0.125406		miR-216a-5p
hsa-miR-217-5p	3.40836	-0.420254	0.636111	-0.73436	0.46273		miR-217-5p
hsa-miR-218-5p	366.667	-0.671482	0.192227	-3.49477	0.000474472	0.00387169	miR-218-5p
hsa-miR-219a-1-3p	6.66755	0.363071	0.551068	0.654269	0.512939		miR-219a-1-3p
hsa-miR-219a-5p	24.0355	-0.750195	0.442837	-1.71887	0.0856383	0.213051	miR-219a-5p
hsa-miR-219b-5p	11.7464	-0.0846604	0.483872	-0.177534	0.859089		miR-219b-5p
hsa-miR-22-3p	12388.5	0.0671327	0.137886	0.486871	0.62635	0.769816	miR-22-3p
hsa-miR-22-5p	262.559	0.028685	0.173649	0.165433	0.868603	0.92889	miR-22-5p
hsa-miR-221-3p	48992.4	-0.637289	0.123805	-5.14754	2.6393e-07	1.07683e-05	miR-221-3p
hsa-miR-221-5p	487.036	-0.623259	0.163206	-3.81893	0.00013403	0.00160836	miR-221-5p
hsa-miR-222-3p	8854.53	-0.602129	0.131726	-4.57105	4.85291e-06	0.000123749	miR-222-3p
hsa-miR-222-5p	104.327	-1.58782	0.24385	-6.49316	8.40529e-11	8.57339e-09	miR-222-5p
hsa-miR-223-3p	15.1553	-0.878016	0.499755	-1.72904	0.0838016		miR-223-3p
hsa-miR-2276-3p	6.18199	0.0483718	0.574138	0.0754507	0.939856		miR-2276-3p
hsa-miR-2277-3p	13.6922	0.494158	0.429042	1.14899	0.250558		miR-2277-3p
hsa-miR-2277-5p	6.10572	0.697802	0.567344	1.21172	0.225619		miR-2277-5p
hsa-miR-2278	35.8716	-0.291355	0.318063	-0.915856	0.359742	0.557674	miR-2278
hsa-miR-2355-3p	30.999	-0.372235	0.334791	-1.1055	0.268945	0.47449	miR-2355-3p
hsa-miR-2355-5p	6.8927	0.449991	0.546933	0.821724	0.411234		miR-2355-5p
hsa-miR-23a-3p	79337.8	0.0810946	0.131738	0.615575	0.538175	0.711949	miR-23a-3p
hsa-miR-23a-5p	139.945	-0.0080709	0.183021	-0.0427519	0.965899	0.973054	miR-23a-5p
hsa-miR-23b-3p	2951.81	0.370976	0.137369	2.70044	0.0069247	0.0324744	miR-23b-3p
hsa-miR-23b-5p	44.67	0.466991	0.272703	1.70985	0.0872936	0.213268	miR-23b-5p
hsa-miR-23c	222.069	0.323719	0.229996	1.40729	0.15934	0.320251	miR-23c
hsa-miR-24-1-5p	3.60926	0.913168	0.616436	1.37913	0.167856		miR-24-1-5p
hsa-miR-24-2-5p	26.1517	0.765551	0.393908	1.93877	0.052529	0.148903	miR-24-2-5p
hsa-miR-24-3p	45741.3	0.00923144	0.112592	0.0819917	0.934653	0.958137	miR-24-3p
hsa-miR-25-3p	58326.6	-0.0525271	0.105842	-0.496282	0.619696	0.768498	miR-25-3p
hsa-miR-25-5p	127.617	0.162801	0.206583	0.78755	0.43096	0.623516	miR-25-5p
hsa-miR-2682-3p	26.2428	-0.463985	0.312141	-1.45575	0.145463	0.301264	miR-2682-3p
hsa-miR-2682-5p	9.02697	-0.663007	0.495856	-1.28098	0.200201		miR-2682-5p
hsa-miR-26a-1-3p	272.752	-0.323709	0.197184	-1.6399	0.101027	0.232386	miR-26a-1-3p
hsa-miR-26a-2-3p	387.034	-0.165345	0.169738	-0.973659	0.330226	0.526297	miR-26a-2-3p
hsa-miR-26a-5p	17710.9	0.383886	0.149512	2.56758	0.0102411	0.0439827	miR-26a-5p
hsa-miR-26b-3p	166.921	-0.0592698	0.179503	-0.329843	0.741518	0.859487	miR-26b-3p
hsa-miR-26b-5p	86701.9	-0.214362	0.153339	-1.39798	0.16212	0.321092	miR-26b-5p
hsa-miR-27a-3p	127758	-0.599872	0.153078	-3.9188	8.89903e-05	0.00129672	miR-27a-3p
hsa-miR-27a-5p	478.153	-0.0169386	0.189909	-0.088837	0.929211	0.957369	miR-27a-5p
hsa-miR-27b-3p	18639.4	-0.222926	0.179025	-1.24494	0.213156	0.388248	miR-27b-3p
hsa-miR-27b-5p	22.393	-0.301659	0.346989	-0.854753	0.392688	0.587853	miR-27b-5p
hsa-miR-28-3p	16486.7	-0.0838324	0.137176	-0.611102	0.541132	0.71212	miR-28-3p
hsa-miR-28-5p	217.133	0.0664271	0.171871	0.386715	0.698967	0.826605	miR-28-5p
hsa-miR-296-3p	369.031	0.343829	0.171224	2.00803	0.0446402	0.13103	miR-296-3p
hsa-miR-296-5p	134.844	0.49068	0.244112	2.00961	0.0444724	0.13103	miR-296-5p
hsa-miR-299-3p	8.31512	-0.339302	0.523243	-0.601199	0.547707		miR-299-3p
hsa-miR-299-5p	2.92174	-0.0719612	0.636467	-0.0871111	0.930583		miR-299-5p
hsa-miR-29a-3p	211075	-0.454313	0.165801	-2.74029	0.00613856	0.0298159	miR-29a-3p
hsa-miR-29a-5p	248.275	-0.344034	0.177647	-1.93857	0.0525541	0.148903	miR-29a-5p
hsa-miR-29b-1-5p	253.591	-0.499856	0.160534	-3.1145	0.00184257	0.0125295	miR-29b-1-5p
hsa-miR-29b-2-5p	16.5894	-0.239779	0.422212	-0.562966	0.573458		miR-29b-2-5p
hsa-miR-29b-3p	40849.6	-0.447061	0.388012	-1.15623	0.247589	0.444715	miR-29b-3p
hsa-miR-29c-3p	2911.19	-0.335238	0.203506	-1.64742	0.0994723	0.231913	miR-29c-3p
hsa-miR-29c-5p	46.4384	-0.389326	0.272012	-1.43149	0.152291	0.310673	miR-29c-5p
hsa-miR-301a-3p	4510.11	-0.527857	0.25305	-2.08617	0.0369634	0.114912	miR-301a-3p
hsa-miR-301a-5p	89.5341	-0.359118	0.227859	-1.57353	0.115596	0.259138	miR-301a-5p
hsa-miR-301b-3p	264.375	-0.640539	0.252827	-2.53528	0.0112356	0.0467768	miR-301b-3p
hsa-miR-301b-5p	6.99574	-0.573151	0.522963	-1.09256	0.274589		miR-301b-5p
hsa-miR-302a-5p	23.8415	-0.822873	0.508465	-1.68351	0.092277	0.217624	miR-302a-5p
hsa-miR-302b-3p	7.42533	-1.11735	0.594453	-1.98581	0.0470548		miR-302b-3p
hsa-miR-302d-3p	1.54215	-0.384082	0.613735	-0.849641	0.395525		miR-302d-3p
hsa-miR-3064-5p	10.8151	-0.499306	0.488683	-1.02063	0.307429		miR-3064-5p
hsa-miR-3065-3p	80.8584	-0.464605	0.244195	-1.90522	0.0567517	0.156045	miR-3065-3p
hsa-miR-3065-5p	374.258	-0.318274	0.148295	-2.14701	0.0317925	0.104607	miR-3065-5p
hsa-miR-30a-3p	3263.64	-0.425932	0.142275	-2.99337	0.00275912	0.0175894	miR-30a-3p
hsa-miR-30a-5p	29317.6	-0.0863441	0.142677	-0.605162	0.545071	0.712785	miR-30a-5p
hsa-miR-30b-3p	130.296	-0.376918	0.223084	-1.69222	0.0906032	0.214919	miR-30b-3p
hsa-miR-30b-5p	20029.2	-0.629789	0.250664	-2.5136	0.0119505	0.0482752	miR-30b-5p
hsa-miR-30c-1-3p	180.525	-0.0166184	0.171796	-0.0966381	0.923014	0.955811	miR-30c-1-3p
hsa-miR-30c-2-3p	380.329	-0.16569	0.161058	-1.02768	0.304101	0.496292	miR-30c-2-3p
hsa-miR-30c-5p	13310.2	-0.185981	0.174072	-1.06836	0.285358	0.483503	miR-30c-5p
hsa-miR-30d-3p	402.48	-0.442382	0.17242	-2.5698	0.0101757	0.0439827	miR-30d-3p
hsa-miR-30d-5p	47871.9	0.358733	0.163603	2.19288	0.0283159	0.093926	miR-30d-5p
hsa-miR-30e-3p	2318.48	-0.353186	0.204276	-1.72896	0.0838164	0.209798	miR-30e-3p
hsa-miR-30e-5p	23042.1	0.0768782	0.169667	0.453138	0.650449	0.785158	miR-30e-5p
hsa-miR-31-3p	165.325	-1.80377	0.256936	-7.00924	2.39613e-12	3.25874e-10	miR-31-3p
hsa-miR-31-5p	7689.3	-1.31997	0.164271	-8.03691	9.21325e-16	1.8795e-13	miR-31-5p
hsa-miR-3117-3p	13.9672	0.0283793	0.478249	0.0439642	0.964933		miR-3117-3p
hsa-miR-3120-3p	5.31602	-0.325468	0.552965	-0.569036	0.569332		miR-3120-3p
hsa-miR-3124-5p	2.95592	0.202281	0.640772	0.313427	0.753956		miR-3124-5p
hsa-miR-3126-3p	7.95275	-0.614618	0.534395	-1.11721	0.263903		miR-3126-3p
hsa-miR-3127-5p	4.72483	0.105665	0.599255	0.176171	0.86016		miR-3127-5p
hsa-miR-3128	3.72669	-0.320973	0.623424	-0.514918	0.60661		miR-3128
hsa-miR-3129-3p	9.46027	0.0952311	0.45891	0.212745	0.831526		miR-3129-3p
hsa-miR-3129-5p	27.0965	0.0712304	0.333326	0.217537	0.82779	0.912806	miR-3129-5p
hsa-miR-3131	2.49765	-0.210605	0.642912	-0.302476	0.762289		miR-3131
hsa-miR-3136-5p	16.1754	-0.236518	0.401995	-0.584655	0.55878		miR-3136-5p
hsa-miR-3138	9.70762	0.193749	0.487022	0.398323	0.690392		miR-3138
hsa-miR-3140-3p	8.05324	0.00535203	0.530845	0.00892869	0.992876		miR-3140-3p
hsa-miR-3143	4.75241	-0.561678	0.598767	-0.968505	0.332792		miR-3143
hsa-miR-3145-3p	14.2275	-0.685322	0.446754	-1.54421	0.122538		miR-3145-3p
hsa-miR-3146	4.11929	0.571312	0.604933	0.913338	0.361065		miR-3146
hsa-miR-3148	2.32471	-0.208698	0.644741	-0.310193	0.756414		miR-3148
hsa-miR-3149	1.82015	0.323752	0.638119	0.449144	0.653328		miR-3149
hsa-miR-3150b-3p	2.68787	-0.502981	0.635783	-0.792445	0.428102		miR-3150b-3p
hsa-miR-3154	7.53528	0.271017	0.535161	0.498349	0.618238		miR-3154
hsa-miR-3157-5p	28.1948	-0.0718188	0.336983	-0.212652	0.831598	0.913261	miR-3157-5p
hsa-miR-3164	13.57	-0.146991	0.475217	-0.322136	0.74735		miR-3164
hsa-miR-3168	7.45843	0.309765	0.368663	1.53012			miR-3168
hsa-miR-3170	4.07591	0.44821	0.609374	0.70608	0.480139		miR-3170
hsa-miR-3173-5p	46.9621	0.452405	0.335364	1.34855	0.177483	0.34157	miR-3173-5p
hsa-miR-3174	3.02172	-0.106696	0.636774	-0.172392	0.86313		miR-3174
hsa-miR-3176	9.62132	-0.15072	0.513667	-0.30587	0.759703		miR-3176
hsa-miR-3183	2.93621	0.41084	0.642049	0.708093	0.478887		miR-3183
hsa-miR-3187-3p	18.8048	0.109092	0.433565	0.253057	0.800224	0.892768	miR-3187-3p
hsa-miR-3189-3p	14.5441	-1.45424	0.493014	-2.94875	0.00319065		miR-3189-3p
hsa-miR-3190-3p	4.13838	0.969694	0.602871	1.58317	0.113383		miR-3190-3p
hsa-miR-3191-3p	2.58038	0.608406	0.640537	0.902401	0.366844		miR-3191-3p
hsa-miR-3192-5p	6.27413	-0.725145	0.57413	-1.26729	0.205051		miR-3192-5p
hsa-miR-3194-5p	4.87559	0.116339	0.5667	0.2065	0.8364		miR-3194-5p
hsa-miR-3199	7.43349	0.451241	0.508004	0.883597	0.376914		miR-3199
hsa-miR-32-3p	138.051	-0.714643	0.275375	-2.59622	0.00942557	0.0423178	miR-32-3p
hsa-miR-32-5p	461.652	-0.348826	0.251533	-1.38974	0.164608	0.324445	miR-32-5p
hsa-miR-3200-3p	26.0001	-0.55016	0.37419	-1.46293	0.143486	0.298685	miR-3200-3p
hsa-miR-320a-3p	2691.32	0.365439	0.192964	1.89372	0.0582623	0.158473	miR-320a-3p
hsa-miR-320b	23.1541	-0.0655768	0.339846	-0.19064	0.848807	0.920675	miR-320b
hsa-miR-320c	5.57544	-0.0664966	0.546127	-0.116355	0.907371		miR-320c
hsa-miR-320d	5.66717	0.503381	0.543696	0.916554	0.359377		miR-320d
hsa-miR-320e	2.92596	0.219357	0.628938	0.342692	0.73183		miR-320e
hsa-miR-323a-3p	1.93758	-0.553948	0.644548	-0.697752	0.485332		miR-323a-3p
hsa-miR-324-3p	1311.88	0.303946	0.137846	2.20496	0.0274567	0.0922409	miR-324-3p
hsa-miR-324-5p	1630.24	-0.0734404	0.175855	-0.417698	0.676168	0.811401	miR-324-5p
hsa-miR-326	139.098	0.0188572	0.206542	0.0910617	0.927444	0.957369	miR-326
hsa-miR-328-3p	316.986	0.979845	0.21638	4.52692	5.98508e-06	0.000136598	miR-328-3p
hsa-miR-330-3p	144.355	0.259632	0.20211	1.28469	0.198902	0.368873	miR-330-3p
hsa-miR-330-5p	149.636	-0.0732096	0.229549	-0.321516	0.747819	0.861893	miR-330-5p
hsa-miR-331-3p	936.991	-0.0244581	0.149074	-0.164045	0.869696	0.92889	miR-331-3p
hsa-miR-331-5p	23.252	0.164199	0.346233	0.474552	0.635107	0.773503	miR-331-5p
hsa-miR-335-3p	2.66776	-0.592385	0.632059	-0.855302	0.392384		miR-335-3p
hsa-miR-335-5p	457.882	-0.906675	0.195457	-4.64114	3.46487e-06	0.000108744	miR-335-5p
hsa-miR-337-5p	9.77644	-0.499185	0.507522	-0.909112	0.363291		miR-337-5p
hsa-miR-338-3p	1484	-0.347591	0.19701	-1.76421	0.0776962	0.196895	miR-338-3p
hsa-miR-339-3p	182.537	0.192135	0.193947	0.99056	0.3219	0.515041	miR-339-3p
hsa-miR-339-5p	1588.31	0.194573	0.184013	1.05738	0.290339	0.483503	miR-339-5p
hsa-miR-33a-3p	64.1157	-0.652427	0.255294	-2.5558	0.0105945	0.0445626	miR-33a-3p
hsa-miR-33a-5p	491.574	-0.579751	0.439817	-1.32532	0.185066	0.351196	miR-33a-5p
hsa-miR-33b-3p	4.85739	0.152473	0.584768	0.261348	0.793824		miR-33b-3p
hsa-miR-33b-5p	48.0167	-0.572029	0.379341	-1.53523	0.124728	0.271424	miR-33b-5p
hsa-miR-340-3p	97.1641	-0.0684313	0.237796	-0.289338	0.772323	0.880359	miR-340-3p
hsa-miR-340-5p	1214.69	-0.480775	0.185325	-2.59575	0.00943853	0.0423178	miR-340-5p
hsa-miR-342-3p	2027.07	0.705728	0.178843	3.94602	7.94597e-05	0.00126678	miR-342-3p
hsa-miR-342-5p	46.3926	0.547662	0.287475	1.90341	0.0569871	0.156045	miR-342-5p
hsa-miR-345-3p	29.7628	-0.0348223	0.321098	-0.11063	0.91191	0.947652	miR-345-3p
hsa-miR-345-5p	977.728	0.227921	0.164689	1.38393	0.166381	0.326363	miR-345-5p
hsa-miR-34a-3p	309.058	-0.196931	0.175048	-1.12555	0.260354	0.461846	miR-34a-3p
hsa-miR-34a-5p	94701.8	-0.197304	0.128636	-1.53384	0.125068	0.271424	miR-34a-5p
hsa-miR-34b-3p	17.1292	0.641682	0.392327	1.62034	0.10516		miR-34b-3p
hsa-miR-34b-5p	22.9296	-0.0958451	0.340175	-0.276009	0.782541	0.88935	miR-34b-5p
hsa-miR-34c-3p	4.48988	0.603549	0.580602	1.01412	0.310524		miR-34c-3p
hsa-miR-34c-5p	70.832	-0.200522	0.306675	-0.651251	0.514884	0.693309	miR-34c-5p
hsa-miR-3605-3p	92.7943	0.161806	0.263568	0.614028	0.539197	0.711949	miR-3605-3p
hsa-miR-3605-5p	26.2718	-0.493249	0.346542	-1.42076	0.155387	0.313852	miR-3605-5p
hsa-miR-3609	178.902	1.19713	0.279073	4.28402	1.83545e-05	0.000356602	miR-3609
hsa-miR-361-3p	6990.86	-0.0719339	0.153861	-0.467549	0.640107	0.775263	miR-361-3p
hsa-miR-361-5p	5521.13	0.317072	0.130964	2.42108	0.0154745	0.0584355	miR-361-5p
hsa-miR-3611	61.5768	-0.66165	0.293961	-2.26286	0.0236441	0.0803899	miR-3611
hsa-miR-3613-3p	14.5633	-0.871218	0.446477	-1.94049	0.0523205		miR-3613-3p
hsa-miR-3613-5p	451.737	-0.432054	0.292963	-1.47787	0.139441	0.293258	miR-3613-5p
hsa-miR-3615	13.1198	0.538377	0.428519	1.25278	0.210286		miR-3615
hsa-miR-362-3p	34.2134	-0.233788	0.361433	-0.662725	0.507506	0.686463	miR-362-3p
hsa-miR-362-5p	274.077	0.0824043	0.158387	0.520023	0.603047	0.757056	miR-362-5p
hsa-miR-3620-3p	3.14632	0.882242	0.625835	1.35012	0.176978		miR-3620-3p
hsa-miR-363-3p	1410.46	-0.203784	0.149093	-1.36634	0.171833	0.332265	miR-363-3p
hsa-miR-363-5p	42.9614	-0.413615	0.282566	-1.45101	0.146776	0.302448	miR-363-5p
hsa-miR-3651	4.10388	1.1189	0.611008	1.73063	0.0835173		miR-3651
hsa-miR-3657	2.65487	0.117524	0.644753	0.183738	0.854219		miR-3657
hsa-miR-3659	1.42305	-0.186643	0.593467	-0.365447	0.714778		miR-3659
hsa-miR-365a-3p	1188.97	-0.145244	0.262402	-0.553554	0.579884	0.748007	miR-365a-3p
hsa-miR-365a-5p	14.6528	0.537127	0.402404	1.32875	0.18393		miR-365a-5p
hsa-miR-365b-3p	14.1601	-0.356513	0.451495	-0.789317	0.429927		miR-365b-3p
hsa-miR-365b-5p	20.0037	0.0675956	0.391566	0.173253	0.862453	0.926002	miR-365b-5p
hsa-miR-3661	9.17894	-0.0723256	0.4991	-0.140708	0.888101		miR-3661
hsa-miR-3662	17.7184	-1.64082	0.443098	-3.64937	0.000262887	0.00255376	miR-3662
hsa-miR-3679-5p	34.8343	0.0755976	0.329475	0.230198	0.817938	0.906798	miR-3679-5p
hsa-miR-3684	4.18044	-0.398786	0.630192	-0.65798	0.510551		miR-3684
hsa-miR-3688-3p	5.00667	-0.707677	0.59201	-1.22029	0.222354		miR-3688-3p
hsa-miR-369-3p	3.03607	-0.591357	0.632349	-0.8536	0.393327		miR-369-3p
hsa-miR-369-5p	1.80195	-0.0593804	0.644368	-0.0708587	0.94351		miR-369-5p
hsa-miR-370-3p	33.1231	0.131036	0.42239	0.312104	0.754961	0.865237	miR-370-3p
hsa-miR-374a-3p	1496.09	-0.919416	0.291781	-3.15463	0.00160704	0.0113047	miR-374a-3p
hsa-miR-374a-5p	5477.89	-0.326024	0.165446	-1.97089	0.048736	0.141023	miR-374a-5p
hsa-miR-374b-3p	185.93	-0.472552	0.254426	-1.85694	0.0633197	0.166674	miR-374b-3p
hsa-miR-374b-5p	1014.83	0.0585514	0.155556	0.376379	0.706635	0.828469	miR-374b-5p
hsa-miR-375-3p	5.33237	0.684749	0.607052	1.19412	0.23243		miR-375-3p
hsa-miR-376a-3p	10.3722	-0.575502	0.470403	-1.14449	0.25242		miR-376a-3p
hsa-miR-376b-3p	9.2046	-0.270225	0.480408	-0.534752	0.592821		miR-376b-3p
hsa-miR-376c-3p	8.775	-0.676751	0.531839	-1.19324	0.232775		miR-376c-3p
hsa-miR-378a-3p	794.951	-0.0468537	0.14023	-0.335326	0.737379	0.857124	miR-378a-3p
hsa-miR-378a-5p	1077.56	-0.13665	0.145006	-0.943396	0.345479	0.537997	miR-378a-5p
hsa-miR-378d	6.0192	0.32767	0.586356	0.58253	0.56021		miR-378d
hsa-miR-379-5p	28.2874	-0.125419	0.31691	-0.376886	0.706259	0.828469	miR-379-5p
hsa-miR-381-3p	7.63974	-0.131192	0.546515	-0.201739	0.840121		miR-381-3p
hsa-miR-382-5p	21.647	0.189287	0.364413	0.520762	0.602533	0.757056	miR-382-5p
hsa-miR-3909	7.82237	0.216706	0.569082	0.388958	0.697307		miR-3909
hsa-miR-3912-3p	11.7244	-0.700947	0.483334	-1.46005	0.144277		miR-3912-3p
hsa-miR-3913-3p	2.30077	0.331364	0.644662	0.541134	0.588415		miR-3913-3p
hsa-miR-3913-5p	7.03367	0.0413203	0.541599	0.0725119	0.942195		miR-3913-5p
hsa-miR-3928-3p	19.2648	0.307277	0.405134	0.757694	0.448634	0.636305	miR-3928-3p
hsa-miR-3934-3p	5.35616	-0.185273	0.565288	-0.337157	0.735998		miR-3934-3p
hsa-miR-3934-5p	1.33136	0.413975	0.632216	0.694179	0.48757		miR-3934-5p
hsa-miR-3935	3.19992	-1.0557	0.633943	-1.53265	0.125363		miR-3935
hsa-miR-3940-3p	56.9237	0.66729	0.265191	2.51404	0.0119358	0.0482752	miR-3940-3p
hsa-miR-3943	1.24197	1.76455	0.589371	2.41643	0.0156736		miR-3943
hsa-miR-409-3p	46.6827	0.152699	0.280207	0.549001	0.583005	0.748007	miR-409-3p
hsa-miR-411-5p	20.3603	0.176184	0.371428	0.477364	0.633103	0.773372	miR-411-5p
hsa-miR-421	461.973	0.0253513	0.141765	0.178758	0.858128	0.923789	miR-421
hsa-miR-423-3p	1532.87	0.729781	0.182249	4.00437	6.21826e-05	0.0010571	miR-423-3p
hsa-miR-423-5p	3690.64	0.839984	0.202835	4.14118	3.45531e-05	0.000612942	miR-423-5p
hsa-miR-424-3p	147.416	0.327889	0.209693	1.56293	0.118068	0.262317	miR-424-3p
hsa-miR-424-5p	8603.07	-0.3472	0.227838	-1.52295	0.127771	0.274897	miR-424-5p
hsa-miR-425-3p	927.853	-0.107747	0.124487	-0.8655	0.386764	0.582287	miR-425-3p
hsa-miR-425-5p	3006.64	0.185112	0.179134	1.03339	0.301421	0.495886	miR-425-5p
hsa-miR-4289	5.09095	0.36496	0.580396	0.636448	0.524485		miR-4289
hsa-miR-429	6.97197	0.202665	0.547641	0.370575	0.710954		miR-429
hsa-miR-431-5p	1.79229	-0.542435	0.636407	-0.638127	0.523391		miR-431-5p
hsa-miR-432-5p	12.1399	-0.174246	0.430427	-0.372202	0.709742		miR-432-5p
hsa-miR-4326	24.7206	0.300408	0.378047	0.79533	0.426422	0.619283	miR-4326
hsa-miR-4425	21.1377	-0.181537	0.411477	-0.442822	0.657895	0.791803	miR-4425
hsa-miR-4428	0.834168	0.507549	0.352909	0.981923	0.326138		miR-4428
hsa-miR-4431	3.96713	0.330933	0.605954	0.553543	0.579892		miR-4431
hsa-miR-4435	1.49706	0.908721	0.637176	1.25394	0.209865		miR-4435
hsa-miR-4458	4.08139	-0.370245	0.597487	-0.59455	0.552144		miR-4458
hsa-miR-4467	2.28536	-0.995044	0.642762	-1.7406	0.0817537		miR-4467
hsa-miR-4473	3.67973	0.12202	0.61974	0.196828	0.843962		miR-4473
hsa-miR-449a	10.1772	-0.68395	0.482249	-1.41948	0.155758		miR-449a
hsa-miR-4504	2.42107	-0.857221	0.641998	-1.32322	0.185763		miR-4504
hsa-miR-450a-1-3p	35.8653	0.0765477	0.290386	0.267736	0.788903	0.892768	miR-450a-1-3p
hsa-miR-450a-2-3p	18.9214	0.495814	0.392687	1.24972	0.211403	0.388248	miR-450a-2-3p
hsa-miR-450a-5p	12.7011	0.161436	0.420257	0.385656	0.699751		miR-450a-5p
hsa-miR-450b-5p	146.538	-0.147481	0.202161	-0.72695	0.467257	0.654753	miR-450b-5p
hsa-miR-4521	2127.18	-0.697695	0.181696	-3.84013	0.000122971	0.00152037	miR-4521
hsa-miR-4523	1.96909	-0.450983	0.644508	-0.638686	0.523027		miR-4523
hsa-miR-4525	5.42938	0.724694	0.581758	1.22588	0.220244		miR-4525
hsa-miR-454-3p	11063.5	-0.157742	0.123219	-1.28017	0.200486	0.370128	miR-454-3p
hsa-miR-454-5p	64.9119	0.173061	0.249874	0.692836	0.488413	0.670688	miR-454-5p
hsa-miR-455-3p	815.606	-0.273882	0.146639	-1.86737	0.0618506	0.164935	miR-455-3p
hsa-miR-455-5p	1159.17	-0.270097	0.162433	-1.66268	0.0963766	0.225986	miR-455-5p
hsa-miR-4636	7.01541	0.198091	0.561426	0.355245	0.722406		miR-4636
hsa-miR-4640-3p	5.12226	0.343344	0.580316	0.589419	0.55558		miR-4640-3p
hsa-miR-4640-5p	2.86223	0.230081	0.634449	0.352872	0.724185		miR-4640-5p
hsa-miR-4645-3p	1.95767	-0.420039	0.640767	-0.743007	0.457478		miR-4645-3p
hsa-miR-4659a-3p	2.34711	-0.510344	0.643964	-0.918669	0.358269		miR-4659a-3p
hsa-miR-4662a-5p	55.4342	0.907659	0.330521	2.75594	0.00585246	0.0295764	miR-4662a-5p
hsa-miR-4664-3p	2.49103	-1.11453	0.638945	-1.65372	0.0981838		miR-4664-3p
hsa-miR-4668-5p	5.68361	-0.714803	0.555719	-1.24188	0.21428		miR-4668-5p
hsa-miR-4676-3p	1.71994	-1.38775	0.633061	-2.01092	0.044334		miR-4676-3p
hsa-miR-4677-3p	43.1694	-0.443009	0.316819	-1.39868	0.161908	0.321092	miR-4677-3p
hsa-miR-4677-5p	6.32984	-0.207947	0.58908	-0.407056	0.683967		miR-4677-5p
hsa-miR-4685-3p	2.44418	0.642478	0.644549	0.973171	0.330468		miR-4685-3p
hsa-miR-4690-3p	2.99089	-0.222022	0.644351	-0.337195	0.73597		miR-4690-3p
hsa-miR-4705	5.45033	-0.648888	0.604675	-1.14273	0.253153		miR-4705
hsa-miR-4709-3p	5.50692	0.403819	0.614275	0.720223	0.471388		miR-4709-3p
hsa-miR-4709-5p	2.3637	0.193645	0.644837	0.308373	0.757798		miR-4709-5p
hsa-miR-4714-3p	5.20838	-0.954434	0.593993	-1.57014	0.116383		miR-4714-3p
hsa-miR-4725-3p	6.64614	0.0826345	0.559239	0.148725	0.881771		miR-4725-3p
hsa-miR-4728-3p	3.50222	-0.0292949	0.616977	-0.0368982	0.970566		miR-4728-3p
hsa-miR-4731-3p	7.02253	0.524825	0.515095	0.993524	0.320455		miR-4731-3p
hsa-miR-4731-5p	6.561	1.80353	0.539823	3.15735	0.0015921		miR-4731-5p
hsa-miR-4741	2.208	-0.0506281	0.644387	-0.0697879	0.944363		miR-4741
hsa-miR-4742-3p	2.12411	-0.182484	0.639396	-0.309503	0.756939		miR-4742-3p
hsa-miR-4742-5p	4.28986	0.476131	0.605265	0.786589	0.431523		miR-4742-5p
hsa-miR-4746-5p	18.6029	-0.21071	0.382675	-0.544277	0.586251	0.749813	miR-4746-5p
hsa-miR-4747-5p	4.83157	0.325349	0.581482	0.553051	0.580229		miR-4747-5p
hsa-miR-4748	2.2871	-0.182766	0.64466	-0.311287	0.755582		miR-4748
hsa-miR-4762-3p	3.05365	0.260744	0.617268	0.412548	0.679938		miR-4762-3p
hsa-miR-4766-3p	12.6814	-0.571279	0.456207	-1.24769	0.212145		miR-4766-3p
hsa-miR-4775	5.12962	-1.1184	0.609662	-1.89473	0.0581279		miR-4775
hsa-miR-4780	1.1624	0.590531	0.618544	0.749843	0.45335		miR-4780
hsa-miR-4781-3p	6.248	-0.503086	0.556003	-0.918654	0.358276		miR-4781-3p
hsa-miR-4787-3p	3.03295	0.188191	0.63353	0.305744	0.7598		miR-4787-3p
hsa-miR-4791	5.65574	0.280595	0.566206	0.497943	0.618524		miR-4791
hsa-miR-4799-5p	3.5312	0.442934	0.607946	0.720657	0.471121		miR-4799-5p
hsa-miR-4804-3p	1.85261	-0.772138	0.631603	-1.21157	0.225678		miR-4804-3p
hsa-miR-4804-5p	20.902	0.398174	0.362902	1.09662	0.272806	0.475662	miR-4804-5p
hsa-miR-484	35.7043	0.663975	0.391411	1.70146	0.0888574	0.21452	miR-484
hsa-miR-485-3p	6.24436	1.10401	0.543041	1.90973	0.0561683		miR-485-3p
hsa-miR-486-5p	4.63726	0.839953	0.572628	1.40249	0.160768		miR-486-5p
hsa-miR-487b-3p	5.8202	0.0699431	0.571381	0.130749	0.895974		miR-487b-3p
hsa-miR-489-3p	1.59676	-1.43971	0.616807	-2.32297	0.0201809		miR-489-3p
hsa-miR-491-3p	12.4187	-1.04171	0.476947	-2.18099	0.0291845		miR-491-3p
hsa-miR-491-5p	72.5197	0.254624	0.253942	1.00252	0.316095	0.509749	miR-491-5p
hsa-miR-493-3p	7.95985	0.335875	0.507885	0.644915	0.518982		miR-493-3p
hsa-miR-493-5p	2.72676	1.23037	0.635014	1.67801	0.0933443		miR-493-5p
hsa-miR-494-3p	14.1029	-0.411728	0.442986	-0.914066	0.360682		miR-494-3p
hsa-miR-497-3p	8.43324	-0.754082	0.553573	-1.33443	0.182064		miR-497-3p
hsa-miR-497-5p	742.803	0.0609383	0.156628	0.389219	0.697114	0.826605	miR-497-5p
hsa-miR-4999-5p	10.8701	-0.368248	0.466231	-0.779002	0.435978		miR-4999-5p
hsa-miR-499a-5p	20.0604	0.830391	0.391729	2.12009	0.0339982	0.109223	miR-499a-5p
hsa-miR-5000-3p	5.19869	0.0923792	0.60571	0.151884	0.879278		miR-5000-3p
hsa-miR-5001-3p	10.3113	0.708338	0.494734	1.42552	0.154008		miR-5001-3p
hsa-miR-5008-5p	1.48092	-0.210491	0.588396	-0.365014	0.715101		miR-5008-5p
hsa-miR-500a-3p	559.956	0.0152112	0.181101	0.0838575	0.93317	0.958137	miR-500a-3p
hsa-miR-500a-5p	81.4794	0.036303	0.252883	0.142734	0.886501	0.934605	miR-500a-5p
hsa-miR-500b-3p	6.49424	-0.0318517	0.557426	-0.0571436	0.954431		miR-500b-3p
hsa-miR-500b-5p	3.02849	0.574703	0.624933	0.892577	0.372084		miR-500b-5p
hsa-miR-501-3p	92.9705	0.366639	0.230104	1.59333	0.111087	0.250405	miR-501-3p
hsa-miR-501-5p	33.8021	0.106822	0.336386	0.317598	0.75079	0.86288	miR-501-5p
hsa-miR-5010-3p	3.65347	0.0582339	0.617375	0.0920527	0.926656		miR-5010-3p
hsa-miR-5010-5p	3.05717	-0.0817888	0.624734	-0.129981	0.896582		miR-5010-5p
hsa-miR-502-3p	184.736	0.171478	0.180591	0.949344	0.342446	0.537376	miR-502-3p
hsa-miR-502-5p	25.4881	0.0446802	0.361467	0.121901	0.902977	0.942237	miR-502-5p
hsa-miR-503-3p	52.9663	0.856819	0.29028	2.93934	0.00328911	0.0194487	miR-503-3p
hsa-miR-503-5p	2477.91	0.143996	0.176687	0.814865	0.41515	0.609285	miR-503-5p
hsa-miR-504-5p	3.49076	-0.529988	0.629606	-0.789841	0.429621		miR-504-5p
hsa-miR-505-3p	430.48	-0.125715	0.152484	-0.824425	0.409698	0.603455	miR-505-3p
hsa-miR-505-5p	96.5856	0.230613	0.209995	1.09838	0.27204	0.475662	miR-505-5p
hsa-miR-506-3p	216.985	0.651624	0.212711	3.06366	0.00218646	0.0143883	miR-506-3p
hsa-miR-506-5p	40.5591	-0.0450837	0.325707	-0.139608	0.88897	0.934793	miR-506-5p
hsa-miR-507	160.179	0.110476	0.208907	0.528371	0.597242	0.756754	miR-507
hsa-miR-508-3p	8392.42	0.37186	0.161015	2.30945	0.0209189	0.0723296	miR-508-3p
hsa-miR-508-5p	593.105	0.728657	0.200992	3.62509	0.000288857	0.00267849	miR-508-5p
hsa-miR-509-3-5p	289.303	0.344287	0.162814	2.11459	0.0344652	0.109858	miR-509-3-5p
hsa-miR-509-3p	1939.44	0.682598	0.1929	3.53855	0.000402338	0.00349264	miR-509-3p
hsa-miR-509-5p	427.962	0.42812	0.144891	2.95476	0.00312914	0.0190551	miR-509-5p
hsa-miR-5091	3.29998	0.63721	0.631375	1.01353	0.310809		miR-5091
hsa-miR-510-3p	77.1845	0.0891116	0.235903	0.377152	0.70606	0.828469	miR-510-3p
hsa-miR-510-5p	475.066	0.46978	0.189887	2.47391	0.0133642	0.0519295	miR-510-5p
hsa-miR-513a-3p	15.5607	-0.23734	0.438284	-0.561359	0.574553		miR-513a-3p
hsa-miR-513a-5p	1067.81	0.00878663	0.193498	0.0454514	0.963747	0.973054	miR-513a-5p
hsa-miR-513b-3p	50.537	-0.0635123	0.343761	-0.188198	0.850722	0.920675	miR-513b-3p
hsa-miR-513b-5p	1023.14	-0.0361535	0.158931	-0.227392	0.820119	0.906798	miR-513b-5p
hsa-miR-513c-3p	15.7851	0.168931	0.413168	0.407724	0.683476		miR-513c-3p
hsa-miR-513c-5p	4793.74	0.0458313	0.179143	0.255839	0.798075	0.892768	miR-513c-5p
hsa-miR-514a-3p	3784.67	0.207827	0.166747	1.24637	0.212629	0.388248	miR-514a-3p
hsa-miR-514a-5p	509.903	-0.118791	0.152882	-0.777298	0.436983	0.625576	miR-514a-5p
hsa-miR-514b-3p	60.1657	0.272974	0.274977	0.992673	0.320869	0.515041	miR-514b-3p
hsa-miR-514b-5p	732.652	0.433604	0.212154	2.0438	0.0409733	0.123831	miR-514b-5p
hsa-miR-5187-5p	9.12876	1.02143	0.518586	1.96464	0.0494565		miR-5187-5p
hsa-miR-532-3p	1027.06	0.665333	0.273263	2.43481	0.0148995	0.0568129	miR-532-3p
hsa-miR-532-5p	7355.43	-0.629617	0.129368	-4.86693	1.13342e-06	3.85364e-05	miR-532-5p
hsa-miR-542-3p	1515.07	-0.185183	0.267814	-0.690524	0.489865	0.670688	miR-542-3p
hsa-miR-542-5p	123.758	0.569087	0.227016	2.50448	0.0122632	0.0490529	miR-542-5p
hsa-miR-545-3p	21.9744	-0.254841	0.463317	-0.561183	0.574673	0.744338	miR-545-3p
hsa-miR-545-5p	52.2909	-1.39667	0.381385	-3.66615	0.00024623	0.002491	miR-545-5p
hsa-miR-548a-3p	113.058	-0.537294	0.305467	-1.76685	0.0772541	0.196895	miR-548a-3p
hsa-miR-548a-5p	7.21376	-0.0288761	0.561944	-0.0581672	0.953615		miR-548a-5p
hsa-miR-548ad-5p	1.77566	-0.684773	0.641336	-1.09129	0.275147		miR-548ad-5p
hsa-miR-548aw	7.53136	0.715793	0.542371	1.32887	0.183892		miR-548aw
hsa-miR-548ay-3p	9.21484	0.0526901	0.50836	0.105736	0.915792		miR-548ay-3p
hsa-miR-548b-3p	6.32647	-0.809861	0.583075	-1.4119	0.157979		miR-548b-3p
hsa-miR-548d-3p	2.43904	-1.31179	0.639888	-1.91983	0.0548798		miR-548d-3p
hsa-miR-548e-3p	19.8766	-0.193469	0.378364	-0.514144	0.607151	0.758213	miR-548e-3p
hsa-miR-548e-5p	33.1361	-0.0752793	0.31112	-0.241771	0.808958	0.899332	miR-548e-5p
hsa-miR-548j-5p	57.58	-0.185534	0.255191	-0.72215	0.470202	0.654753	miR-548j-5p
hsa-miR-548k	13.9613	-0.146935	0.413213	-0.353722	0.723547		miR-548k
hsa-miR-548l	2.41947	0.677589	0.64235	1.00031	0.317161		miR-548l
hsa-miR-548n	14.701	-0.498491	0.48203	-1.04759	0.294826		miR-548n
hsa-miR-548o-3p	4.19923	-0.597864	0.601394	-0.985918	0.324173		miR-548o-3p
hsa-miR-548u	3.23865	-0.788266	0.634151	-1.22789	0.219488		miR-548u
hsa-miR-549a-3p	2.28443	-0.756637	0.638444	-1.61288	0.10677		miR-549a-3p
hsa-miR-550a-3p	2.61922	-0.225158	0.641961	-0.390989	0.695805		miR-550a-3p
hsa-miR-550a-5p	3.49779	-0.421678	0.626713	-0.679131	0.497055		miR-550a-5p
hsa-miR-551b-3p	15.0954	-0.449521	0.469673	-0.991159	0.321608		miR-551b-3p
hsa-miR-561-3p	56.9858	-0.96434	0.271271	-3.54003	0.000400075	0.00349264	miR-561-3p
hsa-miR-561-5p	461.608	-0.751477	0.201728	-3.72309	0.000196798	0.00209549	miR-561-5p
hsa-miR-5690	6.68843	-0.298561	0.569856	-0.525277	0.59939		miR-5690
hsa-miR-5695	2.7886	-0.929683	0.640361	-1.4043	0.16023		miR-5695
hsa-miR-5696	2.80516	-1.20874	0.637862	-1.86386	0.0623414		miR-5696
hsa-miR-5697	5.61436	-0.40395	0.562177	-0.712941	0.475882		miR-5697
hsa-miR-5699-3p	98.2477	-0.0333821	0.233049	-0.146492	0.883533	0.934605	miR-5699-3p
hsa-miR-5699-5p	110.324	-0.426643	0.226642	-1.88564	0.059344	0.160347	miR-5699-5p
hsa-miR-570-3p	36.1097	-0.957938	0.357967	-2.67756	0.00741604	0.0339971	miR-570-3p
hsa-miR-573	6.23582	-0.142368	0.609085	-0.311054	0.75576		miR-573
hsa-miR-574-3p	4267.29	0.689944	0.184611	3.73628	0.000186764	0.00207808	miR-574-3p
hsa-miR-574-5p	27.3099	0.787089	0.35447	2.20318	0.0275819	0.0922409	miR-574-5p
hsa-miR-576-5p	108.314	-0.0107564	0.221549	-0.0488576	0.961033	0.973054	miR-576-5p
hsa-miR-577	239.441	-1.4365	0.251912	-5.69223	1.25388e-08	8.5264e-07	miR-577
hsa-miR-579-3p	6.33162	-0.397874	0.587799	-0.696033	0.486408		miR-579-3p
hsa-miR-579-5p	4.73643	-0.364255	0.59867	-0.632434	0.527103		miR-579-5p
hsa-miR-580-3p	8.58996	-1.16403	0.539217	-2.14313	0.0321026		miR-580-3p
hsa-miR-582-3p	316.238	-0.195767	0.16102	-1.21574	0.224085	0.406341	miR-582-3p
hsa-miR-582-5p	271.167	-0.471729	0.19805	-2.38154	0.0172405	0.0633705	miR-582-5p
hsa-miR-584-3p	53.051	-0.0762745	0.26166	-0.289144	0.772472	0.880359	miR-584-3p
hsa-miR-584-5p	2407.16	-0.424464	0.170942	-2.48271	0.0130389	0.0511525	miR-584-5p
hsa-miR-589-3p	101.109	0.134676	0.221356	0.608559	0.542817	0.71212	miR-589-3p
hsa-miR-589-5p	165.213	0.404292	0.171135	2.3623	0.0181619	0.0655758	miR-589-5p
hsa-miR-590-3p	2512.64	-0.785162	0.202563	-3.87703	0.000105739	0.00143804	miR-590-3p
hsa-miR-590-5p	410.258	-0.683004	0.270396	-2.52821	0.0114647	0.0472486	miR-590-5p
hsa-miR-597-3p	6.99566	0.340166	0.531444	0.638338	0.523253		miR-597-3p
hsa-miR-597-5p	3.78033	0.237348	0.638085	0.404556	0.685804		miR-597-5p
hsa-miR-598-3p	668.082	-0.489087	0.173221	-2.82348	0.00475049	0.0255026	miR-598-3p
hsa-miR-599	2.63322	-0.289655	0.644294	-0.583822	0.55934		miR-599
hsa-miR-615-3p	2051.42	0.65838	0.143477	4.58854	4.46356e-06	0.000122984	miR-615-3p
hsa-miR-615-5p	26.1693	1.40965	0.398922	3.504	0.000458324	0.00383394	miR-615-5p
hsa-miR-616-3p	3.36911	0.189381	0.612346	0.307434	0.758513		miR-616-3p
hsa-miR-616-5p	8.65297	-0.894536	0.516781	-1.73808	0.0821973		miR-616-5p
hsa-miR-624-3p	6.24998	-1.34882	0.591138	-2.27392	0.0229708		miR-624-3p
hsa-miR-624-5p	34.3013	-0.359458	0.344545	-1.04375	0.296603	0.489935	miR-624-5p
hsa-miR-625-3p	10.3604	0.415735	0.485141	0.854931	0.392589		miR-625-3p
hsa-miR-625-5p	14.3896	0.205153	0.437546	0.468595	0.639359		miR-625-5p
hsa-miR-627-3p	12.0349	-0.4837	0.473095	-1.02646	0.304673		miR-627-3p
hsa-miR-627-5p	104.294	-0.207664	0.245394	-0.846602	0.397217	0.589325	miR-627-5p
hsa-miR-628-3p	156.845	-0.191239	0.225065	-0.849583	0.395557	0.589004	miR-628-3p
hsa-miR-628-5p	99.4002	0.234495	0.228033	1.0283	0.303809	0.496292	miR-628-5p
hsa-miR-629-3p	19.9655	-0.943674	0.386509	-2.41787	0.0156114	0.0584355	miR-629-3p
hsa-miR-629-5p	1184.99	-0.302236	0.150119	-2.01299	0.0441159	0.13103	miR-629-5p
hsa-miR-636	4.22817	0.654658	0.597623	1.09865	0.27192		miR-636
hsa-miR-641	29.5143	-0.18756	0.325157	-0.578454	0.562957	0.731486	miR-641
hsa-miR-642a-3p	9.53557	0.594961	0.516038	1.1504	0.249981		miR-642a-3p
hsa-miR-642a-5p	127.007	0.769738	0.284932	2.70263	0.0068793	0.0324744	miR-642a-5p
hsa-miR-643	11.6734	-0.299094	0.475818	-0.637609	0.523728		miR-643
hsa-miR-6505-5p	5.873	-0.131345	0.551322	-0.237476	0.812287		miR-6505-5p
hsa-miR-6507-3p	1.4784	-0.810844	0.625414	-1.39023	0.16446		miR-6507-3p
hsa-miR-6507-5p	17.2471	0.67897	0.427981	1.59313	0.11113		miR-6507-5p
hsa-miR-651-5p	41.6059	-0.255356	0.300766	-0.85357	0.393343	0.587853	miR-651-5p
hsa-miR-6511b-3p	8.03608	0.436273	0.513368	0.848004	0.396436		miR-6511b-3p
hsa-miR-6513-3p	23.7247	-0.0287131	0.361738	-0.0780723	0.937771	0.958732	miR-6513-3p
hsa-miR-6513-5p	3.78309	-0.110678	0.611987	-0.191243	0.848335		miR-6513-5p
hsa-miR-6514-3p	3.70691	0.898912	0.614947	1.43094	0.152447		miR-6514-3p
hsa-miR-6514-5p	8.92907	0.340216	0.503941	0.672902	0.50101		miR-6514-5p
hsa-miR-6516-3p	10.1718	0.750507	0.524413	1.44383	0.148787		miR-6516-3p
hsa-miR-6516-5p	2.23407	0.560831	0.643275	0.836776	0.402718		miR-6516-5p
hsa-miR-652-3p	104.167	-0.189319	0.243396	-0.777871	0.436645	0.625576	miR-652-3p
hsa-miR-652-5p	16.5854	-0.511604	0.448209	-1.14771	0.25109		miR-652-5p
hsa-miR-653-3p	1.74514	-1.14681	0.624369	-2.11359	0.0345501		miR-653-3p
hsa-miR-654-3p	15.0853	0.190448	0.394862	0.483313	0.628873		miR-654-3p
hsa-miR-659-5p	3.46016	-0.882894	0.624813	-1.4763	0.139864		miR-659-5p
hsa-miR-660-3p	12.238	-0.368634	0.492698	-0.760418	0.447005		miR-660-3p
hsa-miR-660-5p	3669.52	-0.222119	0.137312	-1.61779	0.105709	0.2408	miR-660-5p
hsa-miR-663a	2.72285	0.219522	0.634526	0.351566	0.725164		miR-663a
hsa-miR-664a-3p	30.4607	-0.462238	0.432071	-1.07378	0.28292	0.483503	miR-664a-3p
hsa-miR-664a-5p	160.191	0.188824	0.19812	0.953235	0.340471	0.537376	miR-664a-5p
hsa-miR-664b-3p	4.88712	-0.0106623	0.568245	-0.0132197	0.989452		miR-664b-3p
hsa-miR-664b-5p	18.605	0.514003	0.392553	1.30581	0.191618	0.358316	miR-664b-5p
hsa-miR-670-3p	1.96097	0	0.623231	0	1		miR-670-3p
hsa-miR-671-3p	50.6591	0.679928	0.384922	1.76688	0.0772484	0.196895	miR-671-3p
hsa-miR-671-5p	625.797	0.0942365	0.183541	0.51338	0.607685	0.758213	miR-671-5p
hsa-miR-6716-3p	8.87108	0.233537	0.544865	0.427166	0.669258		miR-6716-3p
hsa-miR-6720-3p	18.4825	0.398182	0.374523	1.06104	0.288673	0.483503	miR-6720-3p
hsa-miR-6720-5p	3.6541	0.464658	0.625903	0.778778	0.43611		miR-6720-5p
hsa-miR-6726-3p	4.82248	-0.0375855	0.575458	-0.0669843	0.946594		miR-6726-3p
hsa-miR-6731-3p	5.7091	0.208222	0.566675	0.368938	0.712174		miR-6731-3p
hsa-miR-6731-5p	8.54128	0.528213	0.534332	0.996991	0.318769		miR-6731-5p
hsa-miR-6733-3p	3.22937	0.417312	0.63963	0.604466	0.545534		miR-6733-3p
hsa-miR-6733-5p	3.25559	0.272092	0.631358	0.411443	0.680748		miR-6733-5p
hsa-miR-6734-3p	2.64023	-0.141865	0.63952	-0.226715	0.820646		miR-6734-3p
hsa-miR-6734-5p	8.82239	0.0104026	0.516923	0.0227277	0.981867		miR-6734-5p
hsa-miR-6739-3p	1.26945	0.6477	0.591129	1.16845	0.242626		miR-6739-3p
hsa-miR-6747-3p	8.7582	0.526538	0.522185	0.99837	0.3181		miR-6747-3p
hsa-miR-6750-5p	4.53555	1.00962	0.624363	1.65446	0.0980339		miR-6750-5p
hsa-miR-676-3p	8.10247	-0.527932	0.546316	-0.965654	0.334217		miR-676-3p
hsa-miR-6764-5p	3.23289	0.6119	0.636104	0.991504	0.32144		miR-6764-5p
hsa-miR-6767-5p	2.49431	-1.13993	0.642198	-1.72485	0.0845538		miR-6767-5p
hsa-miR-6769b-3p	7.7341	0.10492	0.526466	0.199195	0.84211		miR-6769b-3p
hsa-miR-6772-3p	2.58761	-0.0178142	0.64271	-0.038158	0.969562		miR-6772-3p
hsa-miR-6775-3p	1.48654	0.561867	0.61806	1.08996	0.275732		miR-6775-3p
hsa-miR-6777-5p	1.99675	0.383573	0.640395	0.570533	0.568316		miR-6777-5p
hsa-miR-6779-5p	1.73539	0.445787	0.632768	0.607227	0.5437		miR-6779-5p
hsa-miR-6782-3p	1.53892	0.0477422	0.627161	0.07432	0.940756		miR-6782-3p
hsa-miR-6783-3p	1.38318	0.795546	0.627842	1.37927	0.167812		miR-6783-3p
hsa-miR-6786-3p	3.63185	0.466127	0.609338	0.755154	0.450157		miR-6786-3p
hsa-miR-6787-3p	2.64096	0.625414	0.63908	0.905558	0.36517		miR-6787-3p
hsa-miR-6802-3p	3.24494	0.564724	0.615474	0.900408	0.367903		miR-6802-3p
hsa-miR-6803-3p	7.48114	0.0321188	0.553846	0.0609119	0.951429		miR-6803-3p
hsa-miR-6808-3p	1.94155	0.0436712	0.64427	0.0785158	0.937418		miR-6808-3p
hsa-miR-6812-3p	2.54053	0.30096	0.644596	0.469123	0.638982		miR-6812-3p
hsa-miR-6821-5p	2.47929	0.07744	0.644837	0.11937	0.904982		miR-6821-5p
hsa-miR-6823-5p	9.30884	-0.954059	0.561994	-1.78567	0.0741528		miR-6823-5p
hsa-miR-6825-5p	2.78098	0.186649	0.638711	0.290014	0.771806		miR-6825-5p
hsa-miR-6832-5p	1.00739	0.0149619	0.59181	0.0224861	0.98206		miR-6832-5p
hsa-miR-6844	3.09588	-0.211455	0.644077	-0.420404	0.674191		miR-6844
hsa-miR-6850-5p	1.47112	-1.34968	0.628683	-1.66748	0.0954184		miR-6850-5p
hsa-miR-6851-5p	3.12983	-0.046358	0.629444	-0.0613505	0.95108		miR-6851-5p
hsa-miR-6852-5p	2.38701	0.418622	0.644768	0.710337	0.477495		miR-6852-5p
hsa-miR-6868-3p	5.73876	-0.017786	0.601088	-0.0328907	0.973762		miR-6868-3p
hsa-miR-6869-5p	2.05071	-1.19462	0.641044	-1.95791	0.0502411		miR-6869-5p
hsa-miR-6873-3p	2.46923	-0.164076	0.639628	-0.270521	0.78676		miR-6873-3p
hsa-miR-6882-5p	4.40668	0.148168	0.619409	0.239267	0.810899		miR-6882-5p
hsa-miR-6885-3p	2.82519	-0.155217	0.636173	-0.243811	0.807377		miR-6885-3p
hsa-miR-6892-5p	7.00039	-0.291361	0.555219	-0.529906	0.596177		miR-6892-5p
hsa-miR-6894-5p	1.76135	-0.741254	0.643527	-1.018	0.30868		miR-6894-5p
hsa-miR-7-1-3p	121.276	0.115949	0.220248	0.525316	0.599364	0.757056	miR-7-1-3p
hsa-miR-7-2-3p	3.52894	-0.465049	0.630322	-0.719756	0.471675		miR-7-2-3p
hsa-miR-7-5p	2453.46	-1.09075	0.191252	-5.70324	1.17553e-08	8.5264e-07	miR-7-5p
hsa-miR-708-3p	6.13333	-1.26891	0.533834	-2.20362	0.0275513		miR-708-3p
hsa-miR-708-5p	63.5038	-0.481914	0.269151	-1.77471	0.0759465	0.196115	miR-708-5p
hsa-miR-7114-5p	1.31956	0.433423	0.613664	0.604594	0.545449		miR-7114-5p
hsa-miR-744-3p	9.60158	-0.257962	0.510914	-0.500907	0.616437		miR-744-3p
hsa-miR-744-5p	794.057	0.808382	0.227425	3.55425	0.000379059	0.0034368	miR-744-5p
hsa-miR-760	72.9817	-0.0160629	0.295308	-0.0523008	0.958289	0.973054	miR-760
hsa-miR-765	8.30067	-0.051649	0.513271	-0.0974453	0.922373		miR-765
hsa-miR-766-3p	6.56443	-0.444045	0.603079	-0.747976	0.454475		miR-766-3p
hsa-miR-766-5p	9.34815	-0.322183	0.51023	-0.635633	0.525016		miR-766-5p
hsa-miR-769-3p	69.3358	0.125456	0.255463	0.491428	0.623124	0.769816	miR-769-3p
hsa-miR-769-5p	421.923	-0.0427311	0.167221	-0.255488	0.798347	0.892768	miR-769-5p
hsa-miR-7706	27.5748	-0.00763772	0.36319	-0.0182252	0.985459	0.990314	miR-7706
hsa-miR-7851-3p	3.92314	-0.477843	0.625218	-0.773045	0.439496		miR-7851-3p
hsa-miR-7974	4.94885	-1.0037	0.610265	-1.68729	0.0915481		miR-7974
hsa-miR-7976	84.8859	-0.16283	0.245976	-0.661773	0.508117	0.686463	miR-7976
hsa-miR-7977	12.2511	0.4824	0.446202	1.07665	0.281636		miR-7977
hsa-miR-802	5.67679	0.577796	0.602864	1.02602	0.304881		miR-802
hsa-miR-873-3p	53.6683	-0.596911	0.3107	-1.91977	0.0548873	0.153384	miR-873-3p
hsa-miR-873-5p	211.052	-0.825006	0.211464	-3.90482	9.42947e-05	0.00132663	miR-873-5p
hsa-miR-874-3p	86.7537	0.856473	0.228979	3.73401	0.000188454	0.00207808	miR-874-3p
hsa-miR-874-5p	21.4634	0.872195	0.367132	2.35537	0.0185041	0.0662253	miR-874-5p
hsa-miR-876-3p	4.71133	-0.176574	0.627676	-0.32915	0.742043		miR-876-3p
hsa-miR-876-5p	12.5211	-0.246048	0.504423	-0.518636	0.604015		miR-876-5p
hsa-miR-877-3p	3.35084	0.208257	0.630479	0.336738	0.736314		miR-877-3p
hsa-miR-877-5p	188.993	-0.0537947	0.209091	-0.256456	0.797598	0.892768	miR-877-5p
hsa-miR-887-3p	307.082	0.278063	0.188562	1.47457	0.140327	0.293608	miR-887-3p
hsa-miR-887-5p	20.9678	0.46291	0.401797	1.15396	0.248517	0.444715	miR-887-5p
hsa-miR-888-5p	18.6997	-0.316091	0.644593	-0.484113	0.628305	0.769816	miR-888-5p
hsa-miR-891a-5p	25.7311	-0.105866	0.644565	-0.145593	0.884243	0.934605	miR-891a-5p
hsa-miR-891b	5.61551	-1.15382	0.634153	-1.81666	0.0692698		miR-891b
hsa-miR-892a	13.7514	-0.15731	0.632186	-0.239949	0.810369		miR-892a
hsa-miR-892b	5.70843	-0.194006	0.612005	-0.310622	0.756088		miR-892b
hsa-miR-9-3p	13.4101	-0.30639	0.468464	-0.688137	0.491366		miR-9-3p
hsa-miR-9-5p	214.633	-0.360111	0.193736	-1.86417	0.0622981	0.16505	miR-9-5p
hsa-miR-92a-1-5p	7.9811	-0.201215	0.546791	-0.387567	0.698336		miR-92a-1-5p
hsa-miR-92a-2-5p	3.94189	-0.659411	0.61349	-1.00887	0.313036		miR-92a-2-5p
hsa-miR-92a-3p	5216.92	0.418376	0.173756	2.40791	0.0160442	0.0595096	miR-92a-3p
hsa-miR-92b-3p	163.736	0.686617	0.237132	2.89637	0.00377511	0.0213325	miR-92b-3p
hsa-miR-92b-5p	84.9635	0.773839	0.248001	3.1187	0.00181649	0.0125295	miR-92b-5p
hsa-miR-93-3p	205.792	0.216211	0.195921	1.1035	0.269808	0.47449	miR-93-3p
hsa-miR-93-5p	129808	-0.333048	0.136734	-2.43574	0.0148616	0.0568129	miR-93-5p
hsa-miR-933	4.93773	0.128431	0.605994	0.210865	0.832993		miR-933
hsa-miR-937-3p	12.7701	0.0715594	0.467842	0.153572	0.877947		miR-937-3p
hsa-miR-937-5p	1.89266	-0.975019	0.629915	-1.95099	0.0510585		miR-937-5p
hsa-miR-939-5p	2.42903	-0.327097	0.643644	-0.507504	0.611801		miR-939-5p
hsa-miR-940	2.85214	-0.115532	0.637616	-0.182762	0.854985		miR-940
hsa-miR-941	65.8879	0.680822	0.298391	2.2792	0.0226552	0.0776751	miR-941
hsa-miR-942-5p	162.858	0.107167	0.201099	0.532885	0.594113	0.755134	miR-942-5p
hsa-miR-943	5.02173	-0.571773	0.620913	-1.08305	0.278787		miR-943
hsa-miR-95-3p	14.1403	-0.752419	0.439337	-1.72541	0.0844527		miR-95-3p
hsa-miR-96-5p	2.49051	-0.245902	0.639419	-0.374776	0.707827		miR-96-5p
hsa-miR-98-3p	112.431	-0.648064	0.252761	-2.56153	0.0104213	0.0442904	miR-98-3p
hsa-miR-98-5p	3512.98	-0.0351807	0.184079	-0.191123	0.848429	0.920675	miR-98-5p
hsa-miR-9903	9.01826	0.255777	0.503279	0.504218	0.614108		miR-9903
hsa-miR-9985	29.8267	-0.281103	0.306451	-0.90357	0.366223	0.561726	miR-9985
hsa-miR-99a-3p	55.0666	-0.0297449	0.268049	-0.109492	0.912812	0.947652	miR-99a-3p
hsa-miR-99a-5p	494.839	0.197118	0.196605	1.00254	0.316081	0.509749	miR-99a-5p
hsa-miR-99b-3p	1654.69	-0.136975	0.115172	-1.1892	0.234362	0.423096	miR-99b-3p
hsa-miR-99b-5p	31488.6	0.192888	0.119408	1.61535	0.106235	0.2408	miR-99b-5p

## Sheet: miR +TPADox vs TPAfreeDox
id	baseMean	log2FoldChange	lfcSE	stat	pvalue	padj	gene_name
hsa-let-7a-2-3p	60.1212	-2.09361	0.265015	-7.84908	4.19109e-15	1.05226e-13	let-7a-2-3p
hsa-let-7a-3p	442.214	-0.489195	0.213896	-2.28699	0.0221964	0.0684389	let-7a-3p
hsa-let-7a-5p	83333.4	-0.198885	0.154587	-1.28655	0.198251	0.400489	let-7a-5p
hsa-let-7b-3p	106.089	-1.16255	0.221455	-5.24622	1.55248e-07	1.65362e-06	let-7b-3p
hsa-let-7b-5p	45409.6	-0.181205	0.149961	-1.20837	0.226906	0.431122	let-7b-5p
hsa-let-7c-3p	37.0709	-0.862402	0.344558	-2.50423	0.0122719	0.0431356	let-7c-3p
hsa-let-7c-5p	4550.39	-0.778662	0.17144	-4.54218	5.56761e-06	4.65956e-05	let-7c-5p
hsa-let-7d-3p	1366.28	-0.372517	0.156855	-2.37498	0.0175497	0.0573851	let-7d-3p
hsa-let-7d-5p	9542.31	0.0730397	0.13985	0.52229	0.601468	0.803864	let-7d-5p
hsa-let-7e-3p	78.0039	0.0220947	0.242221	0.0912933	0.92726	0.968671	let-7e-3p
hsa-let-7e-5p	67956.1	-0.167204	0.132706	-1.25996	0.207684	0.411263	let-7e-5p
hsa-let-7f-1-3p	135.644	-0.861588	0.220086	-3.91372	9.08849e-05	0.000550794	let-7f-1-3p
hsa-let-7f-2-3p	150.126	0.0451184	0.266259	0.168847	0.865917	0.943757	let-7f-2-3p
hsa-let-7f-5p	152107	-0.083626	0.169157	-0.494372	0.621043	0.81454	let-7f-5p
hsa-let-7g-3p	81.08	0.6522	0.227233	2.86786	0.00413256	0.0173964	let-7g-3p
hsa-let-7g-5p	56452.4	0.191642	0.130442	1.46918	0.141785	0.315426	let-7g-5p
hsa-let-7i-3p	2150.56	0.847487	0.180411	4.69723	2.63718e-06	2.34675e-05	let-7i-3p
hsa-let-7i-5p	640959	0.62385	0.183884	3.39259	0.000692356	0.00335673	let-7i-5p
hsa-miR-1-3p	34.7214	-0.892764	0.618161	-1.3678	0.171374	0.357495	miR-1-3p
hsa-miR-100-3p	964.303	-1.80615	0.431446	-4.14538	3.39248e-05	0.000238491	miR-100-3p
hsa-miR-100-5p	8925.78	-1.16069	0.185038	-6.27143	3.57758e-10	5.71599e-09	miR-100-5p
hsa-miR-101-2-5p	9.13263	0.925516	0.477744	1.91324	0.055717	0.148932	miR-101-2-5p
hsa-miR-101-3p	14006.3	1.07261	0.189539	5.65872	1.52506e-08	1.78686e-07	miR-101-3p
hsa-miR-101-5p	18.9185	1.51838	0.400411	3.74312	0.000181746	0.00106473	miR-101-5p
hsa-miR-10393-3p	1.48569	0.408135	0.619893	0.893602	0.371535		miR-10393-3p
hsa-miR-10395-3p	17.6337	0.186135	0.468061	0.402837	0.687068	0.851177	miR-10395-3p
hsa-miR-10395-5p	92.7852	-0.0938454	0.29733	-0.314565	0.753092	0.886245	miR-10395-5p
hsa-miR-10397-5p	3.07511	1.07067	0.621648	1.68732	0.0915414	0.222677	miR-10397-5p
hsa-miR-10399-3p	3.53256	0.146801	0.603379	0.230743	0.817515	0.916607	miR-10399-3p
hsa-miR-10399-5p	6.38645	0.553615	0.565557	0.985305	0.324474	0.547015	miR-10399-5p
hsa-miR-103a-1-5p	4.58138	0.0476119	0.564509	0.0797729	0.936418	0.969517	miR-103a-1-5p
hsa-miR-103a-2-5p	12.174	0.482272	0.430836	1.11058	0.26675	0.484561	miR-103a-2-5p
hsa-miR-103a-3p	28846.1	0.204413	0.131397	1.55569	0.119781	0.274286	miR-103a-3p
hsa-miR-10523-5p	4.87185	0.290111	0.57268	0.483714	0.628589	0.821241	miR-10523-5p
hsa-miR-10526-3p	3.17469	-1.43829	0.643325	-2.05785	0.0396046	0.112721	miR-10526-3p
hsa-miR-106a-3p	206.021	-1.47716	0.170692	-8.64778	5.25102e-18	1.94288e-16	miR-106a-3p
hsa-miR-106a-5p	12.8265	-0.925077	0.457905	-2.01566	0.0438359	0.122288	miR-106a-5p
hsa-miR-106b-3p	597.06	0.190398	0.149875	1.2705	0.203906	0.40918	miR-106b-3p
hsa-miR-106b-5p	312.806	0.435653	0.17167	2.53732	0.0111704	0.0398618	miR-106b-5p
hsa-miR-107	3381.7	0.648403	0.160323	4.04439	5.24593e-05	0.000347914	miR-107
hsa-miR-10a-3p	544.52	-0.150117	0.142082	-1.05652	0.290731	0.511779	miR-10a-3p
hsa-miR-10a-5p	6424.87	0.238752	0.127592	1.87123	0.0613132	0.159641	miR-10a-5p
hsa-miR-10b-3p	742.117	0.0346475	0.131435	0.26371	0.792003	0.898029	miR-10b-3p
hsa-miR-10b-5p	9970.28	0.360566	0.147307	2.44775	0.0143753	0.0490575	miR-10b-5p
hsa-miR-1179	5.63435	0.268755	0.599182	0.454893	0.649186	0.829778	miR-1179
hsa-miR-1180-3p	78.3002	0.320663	0.255175	1.25847	0.20822	0.411263	miR-1180-3p
hsa-miR-1185-1-3p	2.72693	-2.26603	0.640357	-3.45449	0.000551342	0.00277433	miR-1185-1-3p
hsa-miR-12114	4.05596	-0.366352	0.633048	-0.590112	0.555116	0.768202	miR-12114
hsa-miR-12135	3.74382	0.102282	0.624259	0.151974	0.879207	0.945907	miR-12135
hsa-miR-12136	20.6993	-1.50372	0.419923	-3.55395	0.000379491	0.00199091	miR-12136
hsa-miR-122-5p	48.7511	2.09744	0.330939	6.26669	3.68803e-10	5.76152e-09	miR-122-5p
hsa-miR-1226-3p	82.1529	-0.235299	0.256241	-0.918209	0.358509	0.586121	miR-1226-3p
hsa-miR-1227-3p	3.7979	-0.198535	0.629927	-0.316975	0.751263	0.886245	miR-1227-3p
hsa-miR-1228-3p	4.89723	-0.197136	0.583117	-0.338165	0.735239	0.881076	miR-1228-3p
hsa-miR-1228-5p	3.85584	-0.295082	0.623016	-0.476056	0.634034	0.823893	miR-1228-5p
hsa-miR-1229-3p	10.2932	0.3531	0.506446	0.705112	0.48074	0.70703	miR-1229-3p
hsa-miR-1237-3p	4.26452	0.213487	0.624371	0.367914	0.712937	0.871213	miR-1237-3p
hsa-miR-1248	2647.23	0.318221	0.423983	0.753721	0.451017	0.677489	miR-1248
hsa-miR-1249-3p	35.7542	1.22376	0.341779	3.56968	0.000357415	0.0019035	miR-1249-3p
hsa-miR-1250-5p	4.7532	-0.0325451	0.563226	-0.0605377	0.951727	0.975313	miR-1250-5p
hsa-miR-1252-5p	2.16708	-0.534394	0.644724	-0.747748	0.454612		miR-1252-5p
hsa-miR-1255a	5.68913	0.30547	0.570271	0.514518	0.60689	0.80651	miR-1255a
hsa-miR-125a-3p	288.45	-0.0513017	0.153689	-0.333545	0.738723	0.881701	miR-125a-3p
hsa-miR-125a-5p	122029	-0.0360368	0.199404	-0.180739	0.856572	0.942231	miR-125a-5p
hsa-miR-125b-1-3p	47.7319	-0.93579	0.287885	-3.2406	0.00119278	0.00559016	miR-125b-1-3p
hsa-miR-125b-2-3p	6.79351	0.778342	0.561171	1.39543	0.162887	0.344909	miR-125b-2-3p
hsa-miR-125b-5p	73209.9	-1.25836	0.153145	-8.21631	2.09864e-16	6.41454e-15	miR-125b-5p
hsa-miR-126-3p	12731.3	-0.35976	0.165402	-2.17509	0.0296232	0.0871343	miR-126-3p
hsa-miR-126-5p	2465.75	-0.078425	0.171801	-0.456493	0.648036	0.829778	miR-126-5p
hsa-miR-1262	59.4573	-1.13968	0.280592	-4.05546	5.00366e-05	0.000338228	miR-1262
hsa-miR-1264	2.38787	0.77481	0.640545	1.22593	0.220225		miR-1264
hsa-miR-1269a	3.17529	-1.76438	0.636366	-2.54111	0.0110502	0.0397898	miR-1269a
hsa-miR-127-3p	46.1429	-4.38874	0.413323	-8.76689	1.83667e-18	7.17323e-17	miR-127-3p
hsa-miR-127-5p	1.86094	-1.28182	0.642547	-1.84417	0.0651583		miR-127-5p
hsa-miR-1271-5p	168.212	0.464388	0.23616	1.96667	0.0492211	0.13539	miR-1271-5p
hsa-miR-1275	3.13397	-0.587033	0.635152	-0.945382	0.344464	0.574942	miR-1275
hsa-miR-1276	2.29364	-0.564274	0.641626	-0.834967	0.403736		miR-1276
hsa-miR-1277-3p	91.5654	0.60736	0.491118	1.22963	0.218836	0.422643	miR-1277-3p
hsa-miR-1277-5p	16.4507	-0.0874126	0.397832	-0.220746	0.82529	0.923852	miR-1277-5p
hsa-miR-1278	17.6447	-0.729396	0.382699	-1.89959	0.0574863	0.151213	miR-1278
hsa-miR-128-1-5p	33.0187	0.135061	0.315888	0.429334	0.66768	0.842691	miR-128-1-5p
hsa-miR-128-3p	11784.6	0.0264797	0.123453	0.214493	0.830163	0.926356	miR-128-3p
hsa-miR-1286	3.55321	0.70598	0.610814	1.13639	0.255794	0.473219	miR-1286
hsa-miR-1287-5p	77.3971	-1.26679	0.259783	-4.87055	1.11286e-06	1.0717e-05	miR-1287-5p
hsa-miR-129-1-3p	11.2397	-1.45701	0.528647	-2.72852	0.006362	0.0248471	miR-129-1-3p
hsa-miR-129-2-3p	4.66053	2.17407	0.612651	3.26032	0.00111288	0.0052862	miR-129-2-3p
hsa-miR-129-5p	123.577	-0.535093	0.218649	-2.44779	0.0143737	0.0490575	miR-129-5p
hsa-miR-1291	1287.3	0.0906745	0.276149	0.328796	0.74231	0.884481	miR-1291
hsa-miR-1292-5p	48.8144	-0.0422933	0.277199	-0.151	0.879976	0.945907	miR-1292-5p
hsa-miR-1294	5.35022	-0.523512	0.552234	-0.944081	0.345128	0.574942	miR-1294
hsa-miR-1296-5p	170.322	0.022964	0.253138	0.0912633	0.927283	0.968671	miR-1296-5p
hsa-miR-1297	4.00019	-0.454524	0.586011	-0.774234	0.438793	0.67205	miR-1297
hsa-miR-1298-5p	1.58538	0.370187	0.436631	1.1289	0.258941		miR-1298-5p
hsa-miR-1301-3p	798.902	0.200272	0.173215	1.15638	0.247524	0.460343	miR-1301-3p
hsa-miR-1304-5p	1.99379	-0.754659	0.642813	-1.27162	0.203508		miR-1304-5p
hsa-miR-1305	5.33804	0.44448	0.605985	0.720331	0.471321	0.696846	miR-1305
hsa-miR-1306-3p	3.33963	0.827436	0.628655	1.41084	0.158293	0.339825	miR-1306-3p
hsa-miR-1306-5p	106.599	-0.498605	0.342439	-1.4595	0.144428	0.317773	miR-1306-5p
hsa-miR-1307-3p	1034.02	-0.0580587	0.179059	-0.324228	0.745765	0.885596	miR-1307-3p
hsa-miR-1307-5p	396.507	1.45793	0.212463	6.85864	6.95184e-12	1.32085e-10	miR-1307-5p
hsa-miR-130a-3p	34557.1	-0.791936	0.176593	-4.48454	7.30715e-06	5.97317e-05	miR-130a-3p
hsa-miR-130a-5p	66.3819	-1.36543	0.345166	-3.94934	7.83655e-05	0.000500827	miR-130a-5p
hsa-miR-130b-3p	7356.93	-0.483065	0.161238	-2.99597	0.00273577	0.0118719	miR-130b-3p
hsa-miR-130b-5p	166.465	-0.0377866	0.209884	-0.179186	0.857792	0.942231	miR-130b-5p
hsa-miR-132-3p	379.018	2.1925	0.219901	9.96067	2.26534e-23	1.99067e-21	miR-132-3p
hsa-miR-132-5p	42.5681	2.56582	0.324308	7.7687	7.92958e-15	1.92224e-13	miR-132-5p
hsa-miR-133a-3p	4.30973	-0.412613	0.619724	-0.651974	0.514418	0.736559	miR-133a-3p
hsa-miR-134-5p	20.4318	-4.00749	0.527957	-5.40024	6.655e-08	7.19764e-07	miR-134-5p
hsa-miR-1343-3p	4.49115	-0.0190936	0.589159	-0.0335609	0.973227	0.985848	miR-1343-3p
hsa-miR-135b-3p	3.38951	-0.476132	0.618361	-0.742651	0.457693	0.684592	miR-135b-3p
hsa-miR-135b-5p	192.187	0.0219445	0.236134	0.0918222	0.926839	0.968671	miR-135b-5p
hsa-miR-136-3p	4.76142	-0.40669	0.637823	-0.64828	0.516804	0.736559	miR-136-3p
hsa-miR-137-3p	1199.36	-2.47723	0.183286	-13.51	1.36542e-41	9.59888e-39	miR-137-3p
hsa-miR-137-5p	12.8397	-2.24936	0.499477	-4.2937	1.75716e-05	0.000132826	miR-137-5p
hsa-miR-138-1-3p	20.7355	0.865951	0.400962	2.16085	0.0307073	0.0895735	miR-138-1-3p
hsa-miR-138-5p	772.017	0.985539	0.189815	5.19168	2.08407e-07	2.15456e-06	miR-138-5p
hsa-miR-139-5p	4.37928	0.841164	0.607554	1.32951	0.183679	0.377563	miR-139-5p
hsa-miR-140-3p	8381.69	0.323481	0.132508	2.44123	0.0146375	0.049711	miR-140-3p
hsa-miR-140-5p	1704.44	0.247991	0.189097	1.31145	0.189705	0.387682	miR-140-5p
hsa-miR-141-3p	24.823	1.32591	0.368451	3.56242	0.000367445	0.00194221	miR-141-3p
hsa-miR-142-3p	10.5747	0.633269	0.50641	1.24698	0.212403	0.413628	miR-142-3p
hsa-miR-142-5p	7.91553	-0.375394	0.576936	-0.648329	0.516772	0.736559	miR-142-5p
hsa-miR-143-3p	7.24057	0.856573	0.526659	1.62282	0.104627	0.24849	miR-143-3p
hsa-miR-144-3p	0.531109	-0.145804	0.426758	-0.342146	0.732241		miR-144-3p
hsa-miR-145-5p	9.3721	-0.384728	0.477275	-0.806607	0.419893	0.657427	miR-145-5p
hsa-miR-1468-5p	5.22989	-0.667704	0.590434	-1.12728	0.259624	0.474067	miR-1468-5p
hsa-miR-146a-3p	1582.76	1.56751	0.18353	8.53955	1.34748e-17	4.51085e-16	miR-146a-3p
hsa-miR-146a-5p	1.11965e+06	1.17666	0.117019	10.0553	8.70455e-24	8.74185e-22	miR-146a-5p
hsa-miR-146b-3p	1.18332	-0.0555339	0.599695	-0.101164	0.91942		miR-146b-3p
hsa-miR-146b-5p	1236.59	0.911604	0.162262	5.61791	1.93279e-08	2.22746e-07	miR-146b-5p
hsa-miR-147b-3p	3.05503	0.478131	0.634398	0.747321	0.45487	0.68182	miR-147b-3p
hsa-miR-148a-3p	18593.6	-0.0719137	0.211603	-0.33988	0.733947	0.881076	miR-148a-3p
hsa-miR-148a-5p	13.2225	0.118916	0.432071	0.27808	0.780951	0.896128	miR-148a-5p
hsa-miR-148b-3p	16366	0.0573446	0.128643	0.445761	0.65577	0.833827	miR-148b-3p
hsa-miR-148b-5p	108.67	0.572166	0.191581	2.98353	0.00284942	0.0122892	miR-148b-5p
hsa-miR-149-5p	371.339	-0.592942	0.248996	-2.38166	0.0172349	0.0568832	miR-149-5p
hsa-miR-150-5p	8.80684	-0.10686	0.530064	-0.201964	0.839944	0.932346	miR-150-5p
hsa-miR-151a-3p	18997	-0.413919	0.160916	-2.57229	0.0101028	0.0369911	miR-151a-3p
hsa-miR-151a-5p	103.504	-0.334295	0.208473	-1.60354	0.108816	0.254242	miR-151a-5p
hsa-miR-151b	17.3394	0.021495	0.382403	0.0562423	0.955149	0.977362	miR-151b
hsa-miR-152-3p	14618.5	-0.451178	0.124327	-3.62897	0.000284558	0.00152706	miR-152-3p
hsa-miR-152-5p	10.1288	0.0577904	0.480141	0.119898	0.904564	0.961943	miR-152-5p
hsa-miR-1537-3p	34.2085	1.29858	0.386439	3.35155	0.000803593	0.00386936	miR-1537-3p
hsa-miR-1537-5p	106.295	0.826269	0.265585	3.10968	0.0018729	0.0083863	miR-1537-5p
hsa-miR-155-5p	2649.93	0.544764	0.157786	3.452	0.000556444	0.00277433	miR-155-5p
hsa-miR-15a-3p	28.5215	0.7682	0.333136	2.29625	0.0216616	0.0676803	miR-15a-3p
hsa-miR-15a-5p	10132.5	0.317002	0.138225	2.29335	0.0218277	0.0678977	miR-15a-5p
hsa-miR-15b-3p	2739.84	-0.573599	0.204248	-2.80842	0.00497856	0.0201145	miR-15b-3p
hsa-miR-15b-5p	21796.9	0.132667	0.146104	0.908048	0.363853	0.590904	miR-15b-5p
hsa-miR-16-1-3p	116.178	0.0244225	0.294072	0.0825325	0.934223	0.968671	miR-16-1-3p
hsa-miR-16-2-3p	244.082	-0.292081	0.188328	-1.55093	0.120919	0.275101	miR-16-2-3p
hsa-miR-16-5p	353119	-0.19084	0.123621	-1.54375	0.122648	0.278135	miR-16-5p
hsa-miR-17-3p	211.76	0.838511	0.227684	3.68087	0.000232443	0.001311	miR-17-3p
hsa-miR-17-5p	2934.82	0.0919255	0.136615	0.672895	0.501014	0.727712	miR-17-5p
hsa-miR-181a-2-3p	2743.1	-1.53402	0.179283	-8.55694	1.15906e-17	4.07409e-16	miR-181a-2-3p
hsa-miR-181a-3p	592.785	-0.343518	0.184375	-1.86312	0.0624459	0.161991	miR-181a-3p
hsa-miR-181a-5p	1821.17	-0.936826	0.157046	-5.96525	2.4426e-09	3.1799e-08	miR-181a-5p
hsa-miR-181b-2-3p	354.727	-2.29296	0.195148	-11.7368	8.25721e-32	9.6747e-30	miR-181b-2-3p
hsa-miR-181b-3p	85.1755	-0.714936	0.24717	-2.88981	0.00385471	0.0164234	miR-181b-3p
hsa-miR-181b-5p	1557.17	-1.20902	0.1516	-7.97488	1.52535e-15	4.1243e-14	miR-181b-5p
hsa-miR-181c-3p	29.3217	-0.264848	0.347307	-0.762571	0.445719	0.675617	miR-181c-3p
hsa-miR-181c-5p	11.479	0.309855	0.489352	0.629226	0.529201	0.747045	miR-181c-5p
hsa-miR-181d-5p	13.2362	0.0728759	0.445699	0.164129	0.869629	0.943757	miR-181d-5p
hsa-miR-182-5p	24.3433	-0.149832	0.358412	-0.41962	0.674763	0.847068	miR-182-5p
hsa-miR-183-5p	4.73414	0.313935	0.560665	0.528714	0.597004	0.799417	miR-183-5p
hsa-miR-184	13.0301	-2.08483	0.500966	-3.99768	6.39663e-05	0.000416373	miR-184
hsa-miR-1843	28.943	0.855271	0.373738	2.28809	0.0221323	0.0684389	miR-1843
hsa-miR-185-3p	53.3442	0.939271	0.303829	3.09285	0.00198244	0.00876512	miR-185-3p
hsa-miR-185-5p	8705.33	0.972235	0.140704	6.90981	4.85291e-12	9.47665e-11	miR-185-5p
hsa-miR-186-3p	52.1852	0.262801	0.281145	0.934053	0.350276	0.580765	miR-186-3p
hsa-miR-186-5p	17979.9	0.0429378	0.153162	0.280337	0.779219	0.896128	miR-186-5p
hsa-miR-187-3p	57.7013	-0.763783	0.27273	-2.79479	0.00519329	0.0207436	miR-187-3p
hsa-miR-188-3p	13.5052	0.286483	0.444907	0.639664	0.522391	0.740405	miR-188-3p
hsa-miR-188-5p	89.6561	0.576219	0.216701	2.65748	0.00787261	0.029596	miR-188-5p
hsa-miR-18a-3p	27.649	0.628108	0.361607	1.73597	0.0825693	0.203671	miR-18a-3p
hsa-miR-18a-5p	922.652	0.438751	0.188011	2.33354	0.0196196	0.0629799	miR-18a-5p
hsa-miR-18b-3p	9.74091	-1.06332	0.501752	-2.12037	0.0339746	0.0978858	miR-18b-3p
hsa-miR-18b-5p	71.0843	-1.16592	0.278211	-4.18663	2.83133e-05	0.000201053	miR-18b-5p
hsa-miR-1908-3p	2.57242	-0.300947	0.643486	-0.482407	0.629517	0.821241	miR-1908-3p
hsa-miR-1908-5p	5.80872	0.0417195	0.594649	0.0887531	0.929278	0.968671	miR-1908-5p
hsa-miR-190a-3p	4.88993	-0.924281	0.608477	-1.51549	0.129649	0.293065	miR-190a-3p
hsa-miR-190a-5p	2225.8	-1.11945	0.239476	-4.67392	2.95504e-06	2.59674e-05	miR-190a-5p
hsa-miR-190b-5p	63.7834	-0.137373	0.258027	-0.5326	0.59431	0.798924	miR-190b-5p
hsa-miR-191-3p	271.666	-0.502377	0.17843	-2.81547	0.0048706	0.0199072	miR-191-3p
hsa-miR-191-5p	128205	-0.476637	0.157909	-3.01849	0.00254039	0.0111619	miR-191-5p
hsa-miR-1911-5p	2.66671	1.51282	0.6428	2.39961	0.0164124	0.0544438	miR-1911-5p
hsa-miR-1914-3p	2.95944	-0.777534	0.633746	-1.21757	0.223388	0.426744	miR-1914-3p
hsa-miR-1914-5p	3.47633	0.416527	0.613697	0.659782	0.509393	0.735326	miR-1914-5p
hsa-miR-192-3p	22.7682	0.466609	0.390411	1.20597	0.227828	0.431706	miR-192-3p
hsa-miR-192-5p	2871.27	0.564364	0.134598	4.1929	2.75417e-05	0.000197569	miR-192-5p
hsa-miR-193a-3p	24.1013	0.813082	0.346849	2.33113	0.0197465	0.0630991	miR-193a-3p
hsa-miR-193a-5p	966.555	0.0774802	0.173768	0.445854	0.655703	0.833827	miR-193a-5p
hsa-miR-193b-3p	60.3345	-0.830347	0.336076	-2.46912	0.0135444	0.0469051	miR-193b-3p
hsa-miR-193b-5p	199.874	-0.933853	0.204498	-4.56561	4.98054e-06	4.21845e-05	miR-193b-5p
hsa-miR-194-3p	7.11965	0.192554	0.540519	0.35775	0.72053	0.874841	miR-194-3p
hsa-miR-194-5p	635.032	0.848054	0.128429	6.60269	4.03769e-11	7.46972e-10	miR-194-5p
hsa-miR-195-3p	24.6626	-0.869187	0.411448	-2.10902	0.034943	0.0998575	miR-195-3p
hsa-miR-195-5p	466.419	-0.353323	0.164522	-2.14757	0.0317477	0.0922258	miR-195-5p
hsa-miR-196a-3p	27.7303	0.338203	0.327393	1.02866	0.303641	0.525762	miR-196a-3p
hsa-miR-196a-5p	7529.1	-0.0652948	0.150914	-0.43266	0.665262	0.84115	miR-196a-5p
hsa-miR-196b-5p	78.1093	1.6781	0.254642	6.56558	5.18292e-11	9.34255e-10	miR-196b-5p
hsa-miR-197-3p	376.906	0.54887	0.204937	2.67888	0.00738686	0.0283768	miR-197-3p
hsa-miR-197-5p	10.2427	-0.223819	0.490886	-0.455824	0.648517	0.829778	miR-197-5p
hsa-miR-1976	5.60044	0.954214	0.572171	1.63494	0.102062	0.243218	miR-1976
hsa-miR-199a-3p	392.636	-0.942157	0.151614	-6.21281	5.20465e-10	7.78483e-09	miR-199a-3p
hsa-miR-199a-5p	8.91401	-0.794339	0.501086	-1.57838	0.114479	0.265607	miR-199a-5p
hsa-miR-199b-5p	1520.11	-1.26842	0.16455	-7.70731	1.28493e-14	2.91388e-13	miR-199b-5p
hsa-miR-19a-3p	6675.48	0.55603	0.230398	2.41293	0.0158249	0.0532291	miR-19a-3p
hsa-miR-19b-1-5p	15.5129	1.08457	0.421167	2.54816	0.0108294	0.0392427	miR-19b-1-5p
hsa-miR-19b-3p	12791.2	0.225944	0.220684	1.02374	0.305957	0.527176	miR-19b-3p
hsa-miR-200a-3p	21.1958	1.1773	0.364405	3.21318	0.00131274	0.00611162	miR-200a-3p
hsa-miR-200b-3p	16.1811	0.0971956	0.381772	0.249785	0.802754	0.905836	miR-200b-3p
hsa-miR-200c-3p	15.2889	0.624056	0.415197	1.49856	0.133987	0.299977	miR-200c-3p
hsa-miR-203a-3p	215.313	-1.2439	0.305138	-4.07212	4.65875e-05	0.000317971	miR-203a-3p
hsa-miR-204-5p	239.577	0.559597	0.210372	2.65992	0.00781581	0.029596	miR-204-5p
hsa-miR-205-5p	3.27045	0.138656	0.642666	0.203032	0.83911	0.932346	miR-205-5p
hsa-miR-20a-3p	195.909	0.329997	0.206404	1.59788	0.11007	0.256224	miR-20a-3p
hsa-miR-20a-5p	15675.4	0.754976	0.126455	5.97026	2.36875e-09	3.14194e-08	miR-20a-5p
hsa-miR-20b-5p	16503.7	-1.95276	0.147779	-13.2139	7.29631e-40	2.56465e-37	miR-20b-5p
hsa-miR-21-3p	2003.21	-0.157169	0.200047	-0.785565	0.432122	0.6706	miR-21-3p
hsa-miR-21-5p	94500.8	0.0951431	0.149487	0.636436	0.524492	0.741888	miR-21-5p
hsa-miR-210-3p	1299.06	-0.737563	0.200408	-3.68014	0.000233109	0.001311	miR-210-3p
hsa-miR-210-5p	1.11484	-0.668633	0.605579	-1.02967	0.303165		miR-210-5p
hsa-miR-211-3p	357.77	2.25415	0.226535	9.9398	2.79386e-23	2.03606e-21	miR-211-3p
hsa-miR-211-5p	28414.8	2.60667	0.211751	12.3124	7.7662e-35	1.81988e-32	miR-211-5p
hsa-miR-2110	89.6299	0.0240225	0.253407	0.0959052	0.923596	0.968671	miR-2110
hsa-miR-2116-3p	48.2744	-0.985865	0.289943	-3.40109	0.000671175	0.00327664	miR-2116-3p
hsa-miR-2116-5p	58.1913	-1.32279	0.26205	-5.03664	4.73777e-07	4.75808e-06	miR-2116-5p
hsa-miR-212-3p	21.3737	2.78262	0.42922	6.18748	6.11351e-10	8.95375e-09	miR-212-3p
hsa-miR-212-5p	6.0921	2.08606	0.603666	3.19394	0.00140347	0.00649103	miR-212-5p
hsa-miR-215-5p	36.9311	0.419688	0.286909	1.4632	0.143412	0.317039	miR-215-5p
hsa-miR-216a-3p	1.21389	0.18252	0.610446	0.296389	0.766933		miR-216a-3p
hsa-miR-216a-5p	7.79654	1.75643	0.603782	2.85603	0.00428979	0.0178445	miR-216a-5p
hsa-miR-217-5p	3.40836	0.666185	0.622123	1.03133	0.302384	0.525223	miR-217-5p
hsa-miR-218-5p	366.667	0.348106	0.187111	1.85972	0.0629249	0.162633	miR-218-5p
hsa-miR-219a-1-3p	6.66755	0.0891654	0.54919	0.159646	0.87316	0.944717	miR-219a-1-3p
hsa-miR-219a-5p	24.0355	0.800489	0.410555	1.9355	0.0529293	0.143665	miR-219a-5p
hsa-miR-219b-5p	11.7464	-0.328765	0.480647	-0.685506	0.493025	0.71908	miR-219b-5p
hsa-miR-22-3p	12388.5	-0.259281	0.137878	-1.88051	0.0600385	0.156904	miR-22-3p
hsa-miR-22-5p	262.559	-0.201622	0.172921	-1.16602	0.243607	0.455467	miR-22-5p
hsa-miR-221-3p	48992.4	0.389149	0.123752	3.14447	0.00166386	0.00759541	miR-221-3p
hsa-miR-221-5p	487.036	0.497825	0.158999	3.12953	0.00175086	0.0078901	miR-221-5p
hsa-miR-222-3p	8854.53	0.212568	0.131497	1.61642	0.106004	0.250912	miR-222-3p
hsa-miR-222-5p	104.327	-0.312239	0.226567	-1.37784	0.168254	0.353082	miR-222-5p
hsa-miR-223-3p	15.1553	-0.914662	0.494367	-1.83113	0.0670812	0.171484	miR-223-3p
hsa-miR-2276-3p	6.18199	1.28878	0.543972	2.28133	0.022529	0.0691612	miR-2276-3p
hsa-miR-2277-3p	13.6922	0.0366333	0.430591	0.0865375	0.931039	0.968671	miR-2277-3p
hsa-miR-2277-5p	6.10572	0.157754	0.569811	0.282725	0.777388	0.896128	miR-2277-5p
hsa-miR-2278	35.8716	-0.0957824	0.308364	-0.311142	0.755693	0.886681	miR-2278
hsa-miR-2355-3p	30.999	-0.650664	0.332962	-1.95122	0.0510305	0.139048	miR-2355-3p
hsa-miR-2355-5p	6.8927	0.754046	0.534941	1.38621	0.165682	0.348726	miR-2355-5p
hsa-miR-23a-3p	79337.8	0.107792	0.131729	0.818285	0.413194	0.649834	miR-23a-3p
hsa-miR-23a-5p	139.945	-0.674262	0.185398	-3.63615	0.000276746	0.00150816	miR-23a-5p
hsa-miR-23b-3p	2951.81	-0.607293	0.137674	-4.41106	1.02867e-05	8.03507e-05	miR-23b-3p
hsa-miR-23b-5p	44.67	-1.15657	0.292865	-3.94272	8.0561e-05	0.00051022	miR-23b-5p
hsa-miR-23c	222.069	-0.332518	0.23105	-1.43921	0.15009	0.326666	miR-23c
hsa-miR-24-1-5p	3.60926	-0.211906	0.624511	-0.340019	0.733842	0.881076	miR-24-1-5p
hsa-miR-24-2-5p	26.1517	0.239806	0.395736	0.609617	0.542116	0.756165	miR-24-2-5p
hsa-miR-24-3p	45741.3	-0.131951	0.112581	-1.17205	0.241178	0.453337	miR-24-3p
hsa-miR-25-3p	58326.6	-0.0777416	0.105827	-0.734609	0.462577	0.688938	miR-25-3p
hsa-miR-25-5p	127.617	0.512073	0.20063	2.5522	0.0107046	0.0389912	miR-25-5p
hsa-miR-2682-3p	26.2428	-3.19034	0.390404	-7.71075	1.25085e-14	2.91388e-13	miR-2682-3p
hsa-miR-2682-5p	9.02697	-1.65241	0.511295	-3.13628	0.00171107	0.00776053	miR-2682-5p
hsa-miR-26a-1-3p	272.752	-1.29743	0.199984	-6.48574	8.82994e-11	1.51401e-09	miR-26a-1-3p
hsa-miR-26a-2-3p	387.034	-0.624753	0.170001	-3.67491	0.000237935	0.00132753	miR-26a-2-3p
hsa-miR-26a-5p	17710.9	0.137401	0.149501	0.919081	0.358053	0.586121	miR-26a-5p
hsa-miR-26b-3p	166.921	-0.448721	0.179539	-2.49928	0.0124445	0.0435247	miR-26b-3p
hsa-miR-26b-5p	86701.9	-0.0534067	0.153329	-0.348314	0.727605	0.880389	miR-26b-5p
hsa-miR-27a-3p	127758	0.156437	0.153064	1.02199	0.306784	0.527308	miR-27a-3p
hsa-miR-27a-5p	478.153	-0.4513	0.190015	-2.37497	0.0175502	0.0573851	miR-27a-5p
hsa-miR-27b-3p	18639.4	-1.70114	0.179113	-9.49742	2.15164e-21	1.16354e-19	miR-27b-3p
hsa-miR-27b-5p	22.393	-1.74605	0.373927	-4.61727	3.88817e-06	3.37455e-05	miR-27b-5p
hsa-miR-28-3p	16486.7	-0.757069	0.137207	-5.51775	3.43367e-08	3.89334e-07	miR-28-3p
hsa-miR-28-5p	217.133	-0.180594	0.171056	-1.05572	0.291098	0.511779	miR-28-5p
hsa-miR-296-3p	369.031	-0.447014	0.172641	-2.58935	0.00961584	0.0355786	miR-296-3p
hsa-miR-296-5p	134.844	0.137245	0.243927	0.562979	0.573449	0.788914	miR-296-5p
hsa-miR-299-3p	8.31512	-2.15508	0.556279	-3.66595	0.00024642	0.00135338	miR-299-3p
hsa-miR-299-5p	2.92174	-2.12892	0.64119	-3.4278	0.000608483	0.00301242	miR-299-5p
hsa-miR-29a-3p	211075	0.61546	0.165791	3.7121	0.000205545	0.00118441	miR-29a-3p
hsa-miR-29a-5p	248.275	0.825434	0.169483	4.8675	1.13021e-06	1.0737e-05	miR-29a-5p
hsa-miR-29b-1-5p	253.591	0.248376	0.153806	1.61395	0.106538	0.251329	miR-29b-1-5p
hsa-miR-29b-2-5p	16.5894	-0.657053	0.422957	-1.55219	0.120617	0.275101	miR-29b-2-5p
hsa-miR-29b-3p	40849.6	0.794814	0.387994	2.0456	0.040796	0.115179	miR-29b-3p
hsa-miR-29c-3p	2911.19	0.0199642	0.203216	0.0982239	0.921755	0.968671	miR-29c-3p
hsa-miR-29c-5p	46.4384	-0.203775	0.262055	-0.777736	0.436725	0.67205	miR-29c-5p
hsa-miR-301a-3p	4510.11	-0.194626	0.252905	-0.769484	0.441606	0.674889	miR-301a-3p
hsa-miR-301a-5p	89.5341	-0.855629	0.229178	-3.73202	0.000189952	0.0011036	miR-301a-5p
hsa-miR-301b-3p	264.375	0.101755	0.248698	0.408877	0.68263	0.849361	miR-301b-3p
hsa-miR-301b-5p	6.99574	-0.470485	0.508769	-0.922906	0.356056	0.586121	miR-301b-5p
hsa-miR-302a-5p	23.8415	1.15929	0.477894	2.39948	0.0164183	0.0544438	miR-302a-5p
hsa-miR-302b-3p	7.42533	0.943807	0.549584	1.6575	0.0974189	0.235345	miR-302b-3p
hsa-miR-302d-3p	1.54215	0.595983	0.630334	0.949509	0.342362		miR-302d-3p
hsa-miR-3064-5p	10.8151	-0.128552	0.47199	-0.273901	0.784161	0.896128	miR-3064-5p
hsa-miR-3065-3p	80.8584	0.444621	0.229723	1.93231	0.0533211	0.143821	miR-3065-3p
hsa-miR-3065-5p	374.258	0.579852	0.143087	4.05101	5.09979e-05	0.000341443	miR-3065-5p
hsa-miR-30a-3p	3263.64	-1.28747	0.14255	-9.03144	1.69422e-19	7.44399e-18	miR-30a-3p
hsa-miR-30a-5p	29317.6	-0.162859	0.14266	-1.14158	0.25363	0.470453	miR-30a-5p
hsa-miR-30b-3p	130.296	0.249339	0.214533	1.16192	0.245269	0.457358	miR-30b-3p
hsa-miR-30b-5p	20029.2	0.394132	0.250593	1.57257	0.115819	0.266952	miR-30b-5p
hsa-miR-30c-1-3p	180.525	-0.30791	0.17107	-1.79981	0.0718907	0.181796	miR-30c-1-3p
hsa-miR-30c-2-3p	380.329	-1.24939	0.163954	-7.61885	2.55955e-14	5.62301e-13	miR-30c-2-3p
hsa-miR-30c-5p	13310.2	-0.565643	0.174071	-3.24951	0.00115604	0.00545431	miR-30c-5p
hsa-miR-30d-3p	402.48	1.01638	0.164686	6.16986	6.83494e-10	9.80605e-09	miR-30d-3p
hsa-miR-30d-5p	47871.9	1.06992	0.163572	6.54106	6.10844e-11	1.07356e-09	miR-30d-5p
hsa-miR-30e-3p	2318.48	-0.398687	0.204096	-1.95344	0.0507672	0.138869	miR-30e-3p
hsa-miR-30e-5p	23042.1	0.968065	0.169594	5.70809	1.14251e-08	1.36132e-07	miR-30e-5p
hsa-miR-31-3p	165.325	1.9417	0.213865	9.05228	1.40012e-19	6.5619e-18	miR-31-3p
hsa-miR-31-5p	7689.3	1.92023	0.163258	11.7595	6.30877e-32	8.87014e-30	miR-31-5p
hsa-miR-3117-3p	13.9672	1.27727	0.440255	2.86959	0.00411008	0.0173964	miR-3117-3p
hsa-miR-3120-3p	5.31602	-0.627105	0.551035	-1.12761	0.259486	0.474067	miR-3120-3p
hsa-miR-3124-5p	2.95592	-0.421136	0.641855	-0.698042	0.485151	0.710544	miR-3124-5p
hsa-miR-3126-3p	7.95275	-0.979143	0.534018	-1.80816	0.0705823	0.179131	miR-3126-3p
hsa-miR-3127-5p	4.72483	0.186171	0.59231	0.314802	0.752912	0.886245	miR-3127-5p
hsa-miR-3128	3.72669	0.197819	0.613112	0.305759	0.759788	0.888153	miR-3128
hsa-miR-3129-3p	9.46027	-0.856357	0.473947	-1.79681	0.0723651	0.182339	miR-3129-3p
hsa-miR-3129-5p	27.0965	-1.2182	0.351635	-3.45208	0.000556291	0.00277433	miR-3129-5p
hsa-miR-3131	2.49765	-0.599758	0.64293	-0.920235	0.35745	0.586121	miR-3131
hsa-miR-3136-5p	16.1754	-0.561974	0.400595	-1.40204	0.160902	0.342771	miR-3136-5p
hsa-miR-3138	9.70762	-0.246954	0.488286	-0.50589	0.612934	0.811874	miR-3138
hsa-miR-3140-3p	8.05324	-0.0290196	0.523549	-0.0537055	0.95717	0.977362	miR-3140-3p
hsa-miR-3143	4.75241	0.164831	0.576972	0.280299	0.779248	0.896128	miR-3143
hsa-miR-3145-3p	14.2275	0.183459	0.415634	0.436338	0.662592	0.840496	miR-3145-3p
hsa-miR-3146	4.11929	-0.062723	0.608188	-0.103129	0.91786	0.968671	miR-3146
hsa-miR-3148	2.32471	-0.412595	0.644713	-0.639809	0.522296		miR-3148
hsa-miR-3149	1.82015	-0.631296	0.634397	-1.09512	0.273463		miR-3149
hsa-miR-3150b-3p	2.68787	0.11806	0.62601	0.172242	0.863247	0.943757	miR-3150b-3p
hsa-miR-3154	7.53528	-1.33999	0.559183	-2.35665	0.0184407	0.0597412	miR-3154
hsa-miR-3157-5p	28.1948	-0.117292	0.330667	-0.354833	0.722714	0.87598	miR-3157-5p
hsa-miR-3164	13.57	0.459417	0.453621	1.01406	0.310556	0.531194	miR-3164
hsa-miR-3168	7.45843	0	0.368712	0			miR-3168
hsa-miR-3170	4.07591	-0.849791	0.620894	-1.39615	0.162669	0.344909	miR-3170
hsa-miR-3173-5p	46.9621	0.156112	0.334466	0.467464	0.640168	0.827276	miR-3173-5p
hsa-miR-3174	3.02172	0.201081	0.6315	0.309727	0.756769	0.886681	miR-3174
hsa-miR-3176	9.62132	0.461546	0.49111	0.938801	0.347833	0.578077	miR-3176
hsa-miR-3183	2.93621	0.755994	0.63675	1.25835	0.208264	0.411263	miR-3183
hsa-miR-3187-3p	18.8048	-0.287565	0.433757	-0.662948	0.507364	0.733903	miR-3187-3p
hsa-miR-3189-3p	14.5441	0.482916	0.42967	1.1078	0.267947	0.485481	miR-3189-3p
hsa-miR-3190-3p	4.13838	0.0722938	0.611042	0.148151	0.882223	0.946875	miR-3190-3p
hsa-miR-3191-3p	2.58038	-0.211396	0.64249	-0.337078	0.736058	0.881076	miR-3191-3p
hsa-miR-3192-5p	6.27413	-0.613986	0.563392	-1.08959	0.275893	0.496042	miR-3192-5p
hsa-miR-3194-5p	4.87559	-0.493356	0.571481	-0.861996	0.38869	0.62069	miR-3194-5p
hsa-miR-3199	7.43349	0.0805419	0.50775	0.158843	0.873793	0.944717	miR-3199
hsa-miR-32-3p	138.051	-0.337241	0.270311	-1.2475	0.212214	0.413628	miR-32-3p
hsa-miR-32-5p	461.652	1.22767	0.247451	4.95879	7.09339e-07	6.9259e-06	miR-32-5p
hsa-miR-3200-3p	26.0001	-0.519977	0.366897	-1.41474	0.157144	0.338873	miR-3200-3p
hsa-miR-320a-3p	2691.32	-0.0189164	0.192962	-0.0980238	0.921913	0.968671	miR-320a-3p
hsa-miR-320b	23.1541	-0.334704	0.337381	-0.99198	0.321207	0.545432	miR-320b
hsa-miR-320c	5.57544	-0.16156	0.539417	-0.300386	0.763883	0.888153	miR-320c
hsa-miR-320d	5.66717	-0.155089	0.549953	-0.280945	0.778753	0.896128	miR-320d
hsa-miR-320e	2.92596	-0.551706	0.632736	-0.885555	0.375857	0.605446	miR-320e
hsa-miR-323a-3p	1.93758	-1.46539	0.643081	-2.028	0.0425603		miR-323a-3p
hsa-miR-324-3p	1311.88	0.0790218	0.137645	0.574203	0.565831	0.780779	miR-324-3p
hsa-miR-324-5p	1630.24	0.143652	0.175371	0.819142	0.412705	0.649834	miR-324-5p
hsa-miR-326	139.098	0.0617652	0.20326	0.304098	0.761054	0.888153	miR-326
hsa-miR-328-3p	316.986	0.145416	0.217563	0.669045	0.503467	0.729768	miR-328-3p
hsa-miR-330-3p	144.355	-0.144375	0.202239	-0.713691	0.475419	0.700669	miR-330-3p
hsa-miR-330-5p	149.636	0.94386	0.220364	4.28028	1.8666e-05	0.000139598	miR-330-5p
hsa-miR-331-3p	936.991	-0.0770137	0.148532	-0.5185	0.604109	0.804335	miR-331-3p
hsa-miR-331-5p	23.252	-0.0963091	0.343645	-0.279395	0.779942	0.896128	miR-331-5p
hsa-miR-335-3p	2.66776	-0.717588	0.629511	-1.0809	0.279744	0.499137	miR-335-3p
hsa-miR-335-5p	457.882	0.287404	0.190029	1.51206	0.130519	0.294087	miR-335-5p
hsa-miR-337-5p	9.77644	-3.38047	0.575527	-4.53701	5.70586e-06	4.71908e-05	miR-337-5p
hsa-miR-338-3p	1484	-0.105817	0.196547	-0.538387	0.59031	0.796522	miR-338-3p
hsa-miR-339-3p	182.537	0.383629	0.190644	2.01202	0.0442183	0.122384	miR-339-3p
hsa-miR-339-5p	1588.31	0.166715	0.183761	0.907236	0.364282	0.590904	miR-339-5p
hsa-miR-33a-3p	64.1157	-0.110496	0.241802	-0.457635	0.647214	0.829778	miR-33a-3p
hsa-miR-33a-5p	491.574	0.539822	0.43878	1.22622	0.220117	0.423951	miR-33a-5p
hsa-miR-33b-3p	4.85739	-0.0718686	0.581884	-0.122045	0.902863	0.961943	miR-33b-3p
hsa-miR-33b-5p	48.0167	1.54439	0.349505	4.3902	1.13247e-05	8.74868e-05	miR-33b-5p
hsa-miR-340-3p	97.1641	0.28835	0.2305	1.2514	0.21079	0.413628	miR-340-3p
hsa-miR-340-5p	1214.69	1.0464	0.183042	5.71587	1.09147e-08	1.32294e-07	miR-340-5p
hsa-miR-342-3p	2027.07	0.1232	0.178955	0.688623	0.49106	0.717704	miR-342-3p
hsa-miR-342-5p	46.3926	-0.319403	0.294545	-1.08424	0.278257	0.497901	miR-342-5p
hsa-miR-345-3p	29.7628	0.260701	0.307589	0.847519	0.396706	0.629535	miR-345-3p
hsa-miR-345-5p	977.728	0.957993	0.163114	5.87297	4.28061e-09	5.4714e-08	miR-345-5p
hsa-miR-34a-3p	309.058	-0.0693691	0.172617	-0.401711	0.687896	0.851177	miR-34a-3p
hsa-miR-34a-5p	94701.8	0.262141	0.128619	2.03813	0.0415371	0.116802	miR-34a-5p
hsa-miR-34b-3p	17.1292	-1.33984	0.428692	-3.10488	0.00190359	0.00846978	miR-34b-3p
hsa-miR-34b-5p	22.9296	-0.947585	0.350833	-2.69402	0.00705952	0.0272684	miR-34b-5p
hsa-miR-34c-3p	4.48988	-0.155899	0.587324	-0.265243	0.790822	0.898029	miR-34c-3p
hsa-miR-34c-5p	70.832	-0.649939	0.307219	-2.11426	0.0344933	0.0989747	miR-34c-5p
hsa-miR-3605-3p	92.7943	-0.144838	0.262919	-0.550678	0.581854	0.79272	miR-3605-3p
hsa-miR-3605-5p	26.2718	-0.21857	0.3332	-0.656418	0.511555	0.736232	miR-3605-5p
hsa-miR-3609	178.902	-0.474358	0.284036	-1.67146	0.0946306	0.229398	miR-3609
hsa-miR-361-3p	6990.86	0.206022	0.153719	1.34024	0.180166	0.371519	miR-361-3p
hsa-miR-361-5p	5521.13	0.232266	0.130871	1.77482	0.0759277	0.190633	miR-361-5p
hsa-miR-3611	61.5768	0.812226	0.26893	3.01278	0.00258866	0.0113033	miR-3611
hsa-miR-3613-3p	14.5633	-0.571317	0.42927	-1.32722	0.184436	0.378013	miR-3613-3p
hsa-miR-3613-5p	451.737	0.988429	0.289948	3.40672	0.000657482	0.00323224	miR-3613-5p
hsa-miR-3615	13.1198	0.201021	0.427564	0.471215	0.637487	0.826852	miR-3615
hsa-miR-362-3p	34.2134	1.24224	0.329453	3.75087	0.000176223	0.00104105	miR-362-3p
hsa-miR-362-5p	274.077	0.227966	0.155605	1.46523	0.142859	0.316813	miR-362-5p
hsa-miR-3620-3p	3.14632	-0.00263501	0.630853	0.00477226	0.996192	0.996192	miR-3620-3p
hsa-miR-363-3p	1410.46	-1.49284	0.150231	-9.93621	2.89624e-23	2.03606e-21	miR-363-3p
hsa-miR-363-5p	42.9614	-2.25869	0.313918	-7.11534	1.1164e-12	2.24238e-11	miR-363-5p
hsa-miR-3651	4.10388	-0.334034	0.623487	-0.555148	0.578794	0.790082	miR-3651
hsa-miR-3657	2.65487	0.294207	0.643891	0.46812	0.639699	0.827276	miR-3657
hsa-miR-3659	1.42305	0.441358	0.610249	0.868543	0.385097		miR-3659
hsa-miR-365a-3p	1188.97	0.0883337	0.262008	0.33707	0.736064	0.881076	miR-365a-3p
hsa-miR-365a-5p	14.6528	-0.496422	0.417677	-1.18997	0.234057	0.441132	miR-365a-5p
hsa-miR-365b-3p	14.1601	-0.27466	0.441251	-0.622596	0.53355	0.748674	miR-365b-3p
hsa-miR-365b-5p	20.0037	0.290715	0.380884	0.758498	0.448153	0.677489	miR-365b-5p
hsa-miR-3661	9.17894	-0.83618	0.508592	-1.64907	0.099133	0.237042	miR-3661
hsa-miR-3662	17.7184	-0.00993241	0.380087	-0.0304059	0.975743	0.985927	miR-3662
hsa-miR-3679-5p	34.8343	0.0459885	0.324399	0.140901	0.887948	0.951178	miR-3679-5p
hsa-miR-3684	4.18044	0.163488	0.622033	0.254024	0.799477	0.903589	miR-3684
hsa-miR-3688-3p	5.00667	-0.136459	0.571848	-0.238786	0.811271	0.912518	miR-3688-3p
hsa-miR-369-3p	3.03607	-1.20944	0.63427	-1.83307	0.0667918	0.171367	miR-369-3p
hsa-miR-369-5p	1.80195	-0.929726	0.642701	-1.35915	0.174098		miR-369-5p
hsa-miR-370-3p	33.1231	-4.33297	0.518556	-6.45843	1.05797e-10	1.77084e-09	miR-370-3p
hsa-miR-374a-3p	1496.09	0.421211	0.290768	1.44787	0.147653	0.323364	miR-374a-3p
hsa-miR-374a-5p	5477.89	0.755084	0.16503	4.57532	4.75498e-06	4.07652e-05	miR-374a-5p
hsa-miR-374b-3p	185.93	-0.573307	0.252956	-2.26631	0.0234322	0.0710035	miR-374b-3p
hsa-miR-374b-5p	1014.83	0.0107203	0.15506	0.0691936	0.944835	0.972572	miR-374b-5p
hsa-miR-375-3p	5.33237	1.13283	0.593353	1.93171	0.0533958	0.143821	miR-375-3p
hsa-miR-376a-3p	10.3722	-4.06412	0.576502	-5.71597	1.09079e-08	1.32294e-07	miR-376a-3p
hsa-miR-376b-3p	9.2046	-2.1938	0.525369	-3.96919	7.21188e-05	0.000465133	miR-376b-3p
hsa-miR-376c-3p	8.775	-2.87628	0.57495	-4.41757	9.98172e-06	7.88443e-05	miR-376c-3p
hsa-miR-378a-3p	794.951	1.27663	0.136116	9.37752	6.75418e-21	3.39156e-19	miR-378a-3p
hsa-miR-378a-5p	1077.56	1.12213	0.142107	7.89574	2.88596e-15	7.5142e-14	miR-378a-5p
hsa-miR-378d	6.0192	1.62841	0.552462	2.81748	0.00484017	0.0198985	miR-378d
hsa-miR-379-5p	28.2874	-4.26534	0.460605	-7.43096	1.07815e-13	2.29678e-12	miR-379-5p
hsa-miR-381-3p	7.63974	-2.87865	0.597163	-3.93791	8.21936e-05	0.000515912	miR-381-3p
hsa-miR-382-5p	21.647	-3.21992	0.458318	-6.39688	1.58582e-10	2.59263e-09	miR-382-5p
hsa-miR-3909	7.82237	0.773361	0.552788	1.40996	0.158553	0.339825	miR-3909
hsa-miR-3912-3p	11.7244	0.123599	0.454826	0.266355	0.789966	0.898029	miR-3912-3p
hsa-miR-3913-3p	2.30077	0.488483	0.643298	0.789982	0.429538		miR-3913-3p
hsa-miR-3913-5p	7.03367	0.276417	0.527234	0.529679	0.596334	0.799417	miR-3913-5p
hsa-miR-3928-3p	19.2648	-0.502383	0.413018	-1.21766	0.223353	0.426744	miR-3928-3p
hsa-miR-3934-3p	5.35616	0.599958	0.538869	1.08405	0.278343	0.497901	miR-3934-3p
hsa-miR-3934-5p	1.33136	0.743794	0.636933	1.12599	0.260169		miR-3934-5p
hsa-miR-3935	3.19992	-1.37337	0.633441	-2.05617	0.0397666	0.112725	miR-3935
hsa-miR-3940-3p	56.9237	0.00499649	0.26844	0.0198273	0.984181	0.986989	miR-3940-3p
hsa-miR-3943	1.24197	0.197332	0.57211	0.339409	0.734302		miR-3943
hsa-miR-409-3p	46.6827	-4.41528	0.417756	-8.98109	2.68105e-19	1.10869e-17	miR-409-3p
hsa-miR-411-5p	20.3603	-3.61901	0.487521	-6.24054	4.36054e-10	6.66404e-09	miR-411-5p
hsa-miR-421	461.973	0.17471	0.139963	1.24817	0.211968	0.413628	miR-421
hsa-miR-423-3p	1532.87	0.447673	0.182173	2.45774	0.0139815	0.0481814	miR-423-3p
hsa-miR-423-5p	3690.64	0.387597	0.202851	1.91101	0.0560038	0.149131	miR-423-5p
hsa-miR-424-3p	147.416	-2.2961	0.231053	-9.90444	3.98213e-23	2.54494e-21	miR-424-3p
hsa-miR-424-5p	8603.07	-1.93627	0.228011	-8.49191	2.0326e-17	6.49508e-16	miR-424-5p
hsa-miR-425-3p	927.853	-0.107018	0.123703	-0.865135	0.386965	0.620315	miR-425-3p
hsa-miR-425-5p	3006.64	0.351753	0.178921	1.96596	0.0493029	0.13539	miR-425-5p
hsa-miR-4289	5.09095	0.333897	0.572981	0.603665	0.546066	0.760168	miR-4289
hsa-miR-429	6.97197	0.904306	0.526093	1.69031	0.0909692	0.222053	miR-429
hsa-miR-431-5p	1.79229	-1.48063	0.631	-2.1938	0.0282494		miR-431-5p
hsa-miR-432-5p	12.1399	-3.84059	0.551141	-5.04955	4.42858e-07	4.51202e-06	miR-432-5p
hsa-miR-4326	24.7206	0.867772	0.36003	2.40854	0.0160163	0.0536165	miR-4326
hsa-miR-4425	21.1377	0.20854	0.398518	0.520549	0.602681	0.803956	miR-4425
hsa-miR-4428	0.834168	0	0.352262	0	1		miR-4428
hsa-miR-4431	3.96713	0.152712	0.602259	0.274497	0.783703	0.896128	miR-4431
hsa-miR-4435	1.49706	-0.063422	0.633334	-0.10148	0.91917		miR-4435
hsa-miR-4458	4.08139	-0.476665	0.592625	-0.791758	0.428502	0.66793	miR-4458
hsa-miR-4467	2.28536	0.174875	0.639204	0.249743	0.802786		miR-4467
hsa-miR-4473	3.67973	0.0414735	0.615915	0.0710606	0.94335	0.972572	miR-4473
hsa-miR-449a	10.1772	0.232205	0.449104	0.505459	0.613236	0.811874	miR-449a
hsa-miR-4504	2.42107	-0.03853	0.635631	-0.0666272	0.946879		miR-4504
hsa-miR-450a-1-3p	35.8653	-1.38109	0.310719	-4.42579	9.60893e-06	7.67623e-05	miR-450a-1-3p
hsa-miR-450a-2-3p	18.9214	-2.23772	0.451416	-4.80496	1.54782e-06	1.43173e-05	miR-450a-2-3p
hsa-miR-450a-5p	12.7011	-1.21074	0.446189	-2.69458	0.00704768	0.0272684	miR-450a-5p
hsa-miR-450b-5p	146.538	-1.50198	0.21035	-7.13356	9.78027e-13	2.02222e-11	miR-450b-5p
hsa-miR-4521	2127.18	-0.00449386	0.180988	-0.0248747	0.980155	0.986853	miR-4521
hsa-miR-4523	1.96909	-0.412594	0.644727	-0.60187	0.547261		miR-4523
hsa-miR-4525	5.42938	0.0581604	0.586052	0.106898	0.91487	0.968605	miR-4525
hsa-miR-454-3p	11063.5	-0.286207	0.123171	-2.32365	0.0201443	0.0637902	miR-454-3p
hsa-miR-454-5p	64.9119	-0.103018	0.248565	-0.414202	0.678726	0.847503	miR-454-5p
hsa-miR-455-3p	815.606	-0.732921	0.146789	-4.99293	5.94698e-07	5.88835e-06	miR-455-3p
hsa-miR-455-5p	1159.17	-0.400556	0.162108	-2.47089	0.0134778	0.0469051	miR-455-5p
hsa-miR-4636	7.01541	1.22716	0.531791	2.26254	0.0236642	0.0713989	miR-4636
hsa-miR-4640-3p	5.12226	-0.0644501	0.580769	-0.108731	0.913416	0.968524	miR-4640-3p
hsa-miR-4640-5p	2.86223	0.0405012	0.632975	0.0527912	0.957898	0.977362	miR-4640-5p
hsa-miR-4645-3p	1.95767	-0.241146	0.643759	-0.389686	0.696769		miR-4645-3p
hsa-miR-4659a-3p	2.34711	0.00450302	0.644239	0.00924347	0.992625		miR-4659a-3p
hsa-miR-4662a-5p	55.4342	1.53675	0.319939	4.79304	1.64273e-06	1.49979e-05	miR-4662a-5p
hsa-miR-4664-3p	2.49103	-0.858506	0.634643	-1.29542	0.195175	0.396555	miR-4664-3p
hsa-miR-4668-5p	5.68361	-0.983325	0.553004	-1.74547	0.0809024	0.20097	miR-4668-5p
hsa-miR-4676-3p	1.71994	-0.520198	0.643019	-0.673742	0.500475		miR-4676-3p
hsa-miR-4677-3p	43.1694	0.0594711	0.304473	0.193544	0.846533	0.934243	miR-4677-3p
hsa-miR-4677-5p	6.32984	1.31273	0.550966	2.30941	0.0209209	0.0659525	miR-4677-5p
hsa-miR-4685-3p	2.44418	0.0356256	0.644401	0.0696221	0.944494	0.972572	miR-4685-3p
hsa-miR-4690-3p	2.99089	-0.350934	0.644017	-0.545712	0.585264	0.794287	miR-4690-3p
hsa-miR-4705	5.45033	1.37218	0.56202	2.29728	0.0216026	0.0676803	miR-4705
hsa-miR-4709-3p	5.50692	1.72809	0.584149	2.79165	0.00524399	0.0208278	miR-4709-3p
hsa-miR-4709-5p	2.3637	0.768569	0.64309	1.12536	0.260438		miR-4709-5p
hsa-miR-4714-3p	5.20838	-0.449864	0.578411	-0.762818	0.445572	0.675617	miR-4714-3p
hsa-miR-4725-3p	6.64614	-0.208826	0.557595	-0.374858	0.707766	0.868341	miR-4725-3p
hsa-miR-4728-3p	3.50222	-0.859527	0.622764	-1.38923	0.164762	0.347831	miR-4728-3p
hsa-miR-4731-3p	7.02253	-1.22035	0.547523	-2.20727	0.027295	0.0809636	miR-4731-3p
hsa-miR-4731-5p	6.561	-0.242157	0.57278	-0.424966	0.670861	0.843772	miR-4731-5p
hsa-miR-4741	2.208	-0.527691	0.644492	-0.820976	0.41166		miR-4741
hsa-miR-4742-3p	2.12411	0.116479	0.64218	0.180911	0.856438		miR-4742-3p
hsa-miR-4742-5p	4.28986	0.106134	0.605086	0.185773	0.852623	0.939489	miR-4742-5p
hsa-miR-4746-5p	18.6029	-0.888261	0.389911	-2.27443	0.0229399	0.0699276	miR-4746-5p
hsa-miR-4747-5p	4.83157	-0.451365	0.58866	-0.774733	0.438498	0.67205	miR-4747-5p
hsa-miR-4748	2.2871	0.262297	0.644177	0.3982	0.690483		miR-4748
hsa-miR-4762-3p	3.05365	-0.441645	0.621807	-0.719499	0.471833	0.696846	miR-4762-3p
hsa-miR-4766-3p	12.6814	-0.186058	0.438254	-0.424863	0.670937	0.843772	miR-4766-3p
hsa-miR-4775	5.12962	0.740415	0.566015	1.25288	0.210249	0.413628	miR-4775
hsa-miR-4780	1.1624	-0.593785	0.607592	-1.08529	0.277795		miR-4780
hsa-miR-4781-3p	6.248	0.0863337	0.532787	0.157517	0.874837	0.944717	miR-4781-3p
hsa-miR-4787-3p	3.03295	0.616019	0.625037	0.98345	0.325386	0.54724	miR-4787-3p
hsa-miR-4791	5.65574	0.0608795	0.56268	0.118286	0.905841	0.961943	miR-4791
hsa-miR-4799-5p	3.5312	0.291201	0.604366	0.48221	0.629657	0.821241	miR-4799-5p
hsa-miR-4804-3p	1.85261	-0.419902	0.637157	-0.605319	0.544967		miR-4804-3p
hsa-miR-4804-5p	20.902	0.00853573	0.363053	0.0255012	0.979655	0.986853	miR-4804-5p
hsa-miR-484	35.7043	0.863971	0.385026	2.24889	0.0245197	0.0733503	miR-484
hsa-miR-485-3p	6.24436	-1.82251	0.59851	-2.83825	0.0045361	0.0187581	miR-485-3p
hsa-miR-486-5p	4.63726	-1.0436	0.602359	-1.75942	0.0785056	0.195707	miR-486-5p
hsa-miR-487b-3p	5.8202	-2.88552	0.618193	-4.44824	8.65769e-06	6.99581e-05	miR-487b-3p
hsa-miR-489-3p	1.59676	-1.31095	0.625304	-2.00287	0.0451917		miR-489-3p
hsa-miR-491-3p	12.4187	-0.212464	0.44403	-0.479084	0.631879	0.822613	miR-491-3p
hsa-miR-491-5p	72.5197	0.410354	0.248096	1.65472	0.0979813	0.235844	miR-491-5p
hsa-miR-493-3p	7.95985	-2.24237	0.564012	-3.66993	0.000242621	0.00134301	miR-493-3p
hsa-miR-493-5p	2.72676	-1.33995	0.642369	-2.52149	0.0116859	0.0412822	miR-493-5p
hsa-miR-494-3p	14.1029	-0.911406	0.445497	-2.0335	0.0420017	0.117638	miR-494-3p
hsa-miR-497-3p	8.43324	-0.688369	0.545978	-1.24359	0.21365	0.414905	miR-497-3p
hsa-miR-497-5p	742.803	-0.615652	0.157198	-3.91639	8.98831e-05	0.000549459	miR-497-5p
hsa-miR-4999-5p	10.8701	-0.515852	0.460606	-1.11581	0.264505	0.481729	miR-4999-5p
hsa-miR-499a-5p	20.0604	0.775193	0.385876	2.01303	0.044111	0.122384	miR-499a-5p
hsa-miR-5000-3p	5.19869	0.392206	0.597112	0.655546	0.512116	0.736232	miR-5000-3p
hsa-miR-5001-3p	10.3113	0.0204926	0.500839	0.0488944	0.961003	0.979109	miR-5001-3p
hsa-miR-5008-5p	1.48092	1.61791	0.616596	2.1134	0.034567		miR-5008-5p
hsa-miR-500a-3p	559.956	0.227024	0.179772	1.26291	0.206622	0.411263	miR-500a-3p
hsa-miR-500a-5p	81.4794	0.298679	0.246214	1.21356	0.224914	0.428495	miR-500a-5p
hsa-miR-500b-3p	6.49424	0.0913679	0.54791	0.164856	0.869058	0.943757	miR-500b-3p
hsa-miR-500b-5p	3.02849	-0.22679	0.629596	-0.366724	0.713825	0.871213	miR-500b-5p
hsa-miR-501-3p	92.9705	0.308878	0.227144	1.36041	0.1737	0.361276	miR-501-3p
hsa-miR-501-5p	33.8021	0.261582	0.328719	0.794181	0.42709	0.66721	miR-501-5p
hsa-miR-5010-3p	3.65347	0.332757	0.608391	0.53876	0.590052	0.796522	miR-5010-3p
hsa-miR-5010-5p	3.05717	0.0449007	0.618239	0.0691091	0.944903	0.972572	miR-5010-5p
hsa-miR-502-3p	184.736	0.323376	0.177121	1.82591	0.0678638	0.172856	miR-502-3p
hsa-miR-502-5p	25.4881	0.493535	0.346741	1.41993	0.155628	0.336635	miR-502-5p
hsa-miR-503-3p	52.9663	-1.91748	0.327211	-5.82289	5.78391e-09	7.26087e-08	miR-503-3p
hsa-miR-503-5p	2477.91	-2.16932	0.178032	-12.1839	3.7868e-34	6.6553e-32	miR-503-5p
hsa-miR-504-5p	3.49076	-0.505462	0.625987	-0.77439	0.4387	0.67205	miR-504-5p
hsa-miR-505-3p	430.48	-0.181226	0.151288	-1.19788	0.230966	0.436475	miR-505-3p
hsa-miR-505-5p	96.5856	-0.212898	0.21061	-1.01061	0.312204	0.532717	miR-505-5p
hsa-miR-506-3p	216.985	0.481218	0.211765	2.27381	0.0229776	0.0699276	miR-506-3p
hsa-miR-506-5p	40.5591	-0.174039	0.321626	-0.540367	0.588944	0.796522	miR-506-5p
hsa-miR-507	160.179	0.320405	0.204954	1.56375	0.117876	0.270807	miR-507
hsa-miR-508-3p	8392.42	-0.13726	0.161035	-0.852381	0.394003	0.626661	miR-508-3p
hsa-miR-508-5p	593.105	0.125447	0.201359	0.623464	0.53298	0.748674	miR-508-5p
hsa-miR-509-3-5p	289.303	-0.0401752	0.162804	-0.246263	0.805479	0.907454	miR-509-3-5p
hsa-miR-509-3p	1939.44	0.156064	0.192974	0.808913	0.418565	0.656811	miR-509-3p
hsa-miR-509-5p	427.962	0.0725	0.144775	0.501362	0.616116	0.813235	miR-509-5p
hsa-miR-5091	3.29998	0.192108	0.631943	0.337943	0.735406	0.881076	miR-5091
hsa-miR-510-3p	77.1845	0.126187	0.230738	0.548105	0.58362	0.793587	miR-510-3p
hsa-miR-510-5p	475.066	-0.0783929	0.190281	-0.411719	0.680546	0.848269	miR-510-5p
hsa-miR-513a-3p	15.5607	0.943603	0.400644	2.33601	0.0194907	0.0628532	miR-513a-3p
hsa-miR-513a-5p	1067.81	-0.553937	0.193705	-2.85989	0.00423783	0.0177333	miR-513a-5p
hsa-miR-513b-3p	50.537	0.632362	0.332341	1.9006	0.0573548	0.151213	miR-513b-3p
hsa-miR-513b-5p	1023.14	-0.625532	0.159248	-3.92815	8.5602e-05	0.000532551	miR-513b-5p
hsa-miR-513c-3p	15.7851	0.542491	0.395923	1.36929	0.170908	0.357495	miR-513c-3p
hsa-miR-513c-5p	4793.74	-0.564429	0.179205	-3.14975	0.00163408	0.00750825	miR-513c-5p
hsa-miR-514a-3p	3784.67	0.025804	0.166673	0.154851	0.876939	0.945534	miR-514a-3p
hsa-miR-514a-5p	509.903	0.148917	0.15087	0.987088	0.323599	0.546852	miR-514a-5p
hsa-miR-514b-3p	60.1657	0.198572	0.271352	0.733032	0.463539	0.688938	miR-514b-3p
hsa-miR-514b-5p	732.652	0.0348452	0.212167	0.16444	0.869385	0.943757	miR-514b-5p
hsa-miR-5187-5p	9.12876	0.646253	0.518444	1.2694	0.204299	0.40918	miR-5187-5p
hsa-miR-532-3p	1027.06	0.235109	0.27329	0.860767	0.389366	0.62069	miR-532-3p
hsa-miR-532-5p	7355.43	-0.151088	0.129127	-1.17008	0.24197	0.453613	miR-532-5p
hsa-miR-542-3p	1515.07	-1.61237	0.268431	-6.00613	1.90001e-09	2.56867e-08	miR-542-3p
hsa-miR-542-5p	123.758	-1.30289	0.239145	-5.44564	5.16195e-08	5.67008e-07	miR-542-5p
hsa-miR-545-3p	21.9744	0.852189	0.444218	1.90379	0.0569382	0.151047	miR-545-3p
hsa-miR-545-5p	52.2909	-0.0321264	0.359836	-0.0904413	0.927937	0.968671	miR-545-5p
hsa-miR-548a-3p	113.058	0.781646	0.293765	2.65784	0.00786427	0.029596	miR-548a-3p
hsa-miR-548a-5p	7.21376	0.354464	0.547331	0.651634	0.514637	0.736559	miR-548a-5p
hsa-miR-548ad-5p	1.77566	-0.47699	0.644332	-0.739076	0.459861		miR-548ad-5p
hsa-miR-548aw	7.53136	0.679006	0.535736	1.28437	0.199013	0.400877	miR-548aw
hsa-miR-548ay-3p	9.21484	-0.565259	0.513196	-1.10291	0.270066	0.488062	miR-548ay-3p
hsa-miR-548b-3p	6.32647	-0.505308	0.568363	-0.890615	0.373136	0.603022	miR-548b-3p
hsa-miR-548d-3p	2.43904	-0.885667	0.635369	-1.32403	0.185494		miR-548d-3p
hsa-miR-548e-3p	19.8766	0.0304265	0.364319	0.0835033	0.933451	0.968671	miR-548e-3p
hsa-miR-548e-5p	33.1361	0.0389708	0.302368	0.128135	0.898042	0.959458	miR-548e-5p
hsa-miR-548j-5p	57.58	-1.12813	0.26333	-4.27754	1.88974e-05	0.000139841	miR-548j-5p
hsa-miR-548k	13.9613	-0.0554353	0.401555	-0.139647	0.888939	0.951178	miR-548k
hsa-miR-548l	2.41947	-0.0965552	0.641267	-0.156996	0.875248		miR-548l
hsa-miR-548n	14.701	0.277953	0.460439	0.599614	0.548764	0.760909	miR-548n
hsa-miR-548o-3p	4.19923	-0.49724	0.592343	-0.832918	0.404891	0.641077	miR-548o-3p
hsa-miR-548u	3.23865	-0.242312	0.625937	-0.375431	0.70734	0.868341	miR-548u
hsa-miR-549a-3p	2.28443	1.47562	0.64057	1.96624	0.0492708		miR-549a-3p
hsa-miR-550a-3p	2.61922	0.624645	0.633522	0.953931	0.340118	0.569293	miR-550a-3p
hsa-miR-550a-5p	3.49779	-0.0119483	0.617656	-0.0235173	0.981238	0.986853	miR-550a-5p
hsa-miR-551b-3p	15.0954	1.13949	0.426788	2.63465	0.00842239	0.0314944	miR-551b-3p
hsa-miR-561-3p	56.9858	-1.29203	0.270401	-4.76612	1.87806e-06	1.69266e-05	miR-561-3p
hsa-miR-561-5p	461.608	-1.219	0.201949	-6.03456	1.59392e-09	2.24105e-08	miR-561-5p
hsa-miR-5690	6.68843	0.0378715	0.557769	0.0647382	0.948382	0.973303	miR-5690
hsa-miR-5695	2.7886	-0.180196	0.633602	-0.273054	0.784811	0.896128	miR-5695
hsa-miR-5696	2.80516	-0.29973	0.626781	-0.463667	0.642886	0.829264	miR-5696
hsa-miR-5697	5.61436	-0.454797	0.554508	-0.818801	0.4129	0.649834	miR-5697
hsa-miR-5699-3p	98.2477	0.923713	0.219817	4.19807	2.69194e-05	0.000195096	miR-5699-3p
hsa-miR-5699-5p	110.324	0.314353	0.215406	1.4587	0.144648	0.317773	miR-5699-5p
hsa-miR-570-3p	36.1097	0.0106627	0.335286	0.0299462	0.97611	0.985927	miR-570-3p
hsa-miR-573	6.23582	1.66365	0.571529	2.77572	0.00550797	0.0217534	miR-573
hsa-miR-574-3p	4267.29	-1.48241	0.185203	-8.00478	1.19678e-15	3.36533e-14	miR-574-3p
hsa-miR-574-5p	27.3099	-1.6194	0.394083	-4.08466	4.41417e-05	0.000304232	miR-574-5p
hsa-miR-576-5p	108.314	0.231619	0.216165	1.07102	0.284158	0.504453	miR-576-5p
hsa-miR-577	239.441	-2.056	0.253145	-8.11066	5.03438e-16	1.47465e-14	miR-577
hsa-miR-579-3p	6.33162	0.095675	0.57336	0.166094	0.868083	0.943757	miR-579-3p
hsa-miR-579-5p	4.73643	0.606275	0.57427	1.02491	0.305407	0.527176	miR-579-5p
hsa-miR-580-3p	8.58996	-0.162225	0.507058	-0.320272	0.748762	0.886245	miR-580-3p
hsa-miR-582-3p	316.238	-0.148217	0.15903	-0.932037	0.351317	0.58112	miR-582-3p
hsa-miR-582-5p	271.167	-0.429621	0.196063	-2.19116	0.0284401	0.0840057	miR-582-5p
hsa-miR-584-3p	53.051	-0.236914	0.258737	-0.916076	0.359627	0.586585	miR-584-3p
hsa-miR-584-5p	2407.16	-0.62972	0.170843	-3.68572	0.000228061	0.00130347	miR-584-5p
hsa-miR-589-3p	101.109	-0.280183	0.221645	-1.26398	0.206237	0.411263	miR-589-3p
hsa-miR-589-5p	165.213	0.192047	0.169902	1.13074	0.258165	0.474067	miR-589-5p
hsa-miR-590-3p	2512.64	0.341472	0.201764	1.69221	0.090606	0.221937	miR-590-3p
hsa-miR-590-5p	410.258	0.513185	0.267076	1.92033	0.0548167	0.147085	miR-590-5p
hsa-miR-597-3p	6.99566	0.31683	0.52418	0.600426	0.548223	0.760909	miR-597-3p
hsa-miR-597-5p	3.78033	1.61084	0.622873	2.41518	0.0157274	0.0531557	miR-597-5p
hsa-miR-598-3p	668.082	-0.123519	0.171651	-0.719662	0.471733	0.696846	miR-598-3p
hsa-miR-599	2.63322	0.701057	0.642408	1.09067	0.275417	0.496042	miR-599
hsa-miR-615-3p	2051.42	-0.373052	0.143967	-2.5913	0.00956135	0.0355642	miR-615-3p
hsa-miR-615-5p	26.1693	-0.133584	0.414158	-0.319736	0.749168	0.886245	miR-615-5p
hsa-miR-616-3p	3.36911	-0.220584	0.612803	-0.362501	0.716977	0.873544	miR-616-3p
hsa-miR-616-5p	8.65297	-0.216453	0.486039	-0.445563	0.655913	0.833827	miR-616-5p
hsa-miR-624-3p	6.24998	0.097814	0.555249	0.163759	0.869921	0.943757	miR-624-3p
hsa-miR-624-5p	34.3013	0.0654943	0.332071	0.195842	0.844734	0.934243	miR-624-5p
hsa-miR-625-3p	10.3604	0.17206	0.482403	0.358228	0.720173	0.874841	miR-625-3p
hsa-miR-625-5p	14.3896	0.482479	0.424326	1.13342	0.257038	0.474067	miR-625-5p
hsa-miR-627-3p	12.0349	0.0475794	0.452259	0.102398	0.918441	0.968671	miR-627-3p
hsa-miR-627-5p	104.294	-0.104916	0.241154	-0.435018	0.66355	0.840496	miR-627-5p
hsa-miR-628-3p	156.845	-0.302078	0.223276	-1.35292	0.176082	0.365149	miR-628-3p
hsa-miR-628-5p	99.4002	0.165958	0.22521	0.73739	0.460885	0.687903	miR-628-5p
hsa-miR-629-3p	19.9655	-0.710167	0.372402	-1.89838	0.057646	0.151213	miR-629-3p
hsa-miR-629-5p	1184.99	-0.524308	0.149904	-3.49752	0.000469614	0.00242749	miR-629-5p
hsa-miR-636	4.22817	0.665	0.591074	1.12983	0.25855	0.474067	miR-636
hsa-miR-641	29.5143	0.323818	0.308425	1.04623	0.295455	0.516679	miR-641
hsa-miR-642a-3p	9.53557	0.283203	0.514776	0.557908	0.576907	0.789682	miR-642a-3p
hsa-miR-642a-5p	127.007	0.659162	0.28352	2.32786	0.0199197	0.0633646	miR-642a-5p
hsa-miR-643	11.6734	0.346726	0.452072	0.762224	0.445926	0.675617	miR-643
hsa-miR-6505-5p	5.873	-0.337123	0.547042	-0.617671	0.536792	0.751324	miR-6505-5p
hsa-miR-6507-3p	1.4784	-0.190857	0.635647	-0.278325	0.780763		miR-6507-3p
hsa-miR-6507-5p	17.2471	0.722318	0.419551	1.73388	0.0829387	0.203867	miR-6507-5p
hsa-miR-651-5p	41.6059	0.609488	0.281172	2.16159	0.0306496	0.0895735	miR-651-5p
hsa-miR-6511b-3p	8.03608	0.108993	0.512205	0.216126	0.828889	0.926356	miR-6511b-3p
hsa-miR-6513-3p	23.7247	-0.136672	0.356546	-0.383643	0.701243	0.864866	miR-6513-3p
hsa-miR-6513-5p	3.78309	0.193553	0.600389	0.324334	0.745685	0.885596	miR-6513-5p
hsa-miR-6514-3p	3.70691	-0.0157682	0.621873	-0.0101694	0.991886	0.993299	miR-6514-3p
hsa-miR-6514-5p	8.92907	-0.270522	0.508785	-0.532524	0.594363	0.798924	miR-6514-5p
hsa-miR-6516-3p	10.1718	1.15975	0.511847	2.25002	0.0244478	0.0733503	miR-6516-3p
hsa-miR-6516-5p	2.23407	0.0172718	0.64293	0.0362469	0.971086		miR-6516-5p
hsa-miR-652-3p	104.167	0.0111553	0.238612	0.0463563	0.963026	0.97975	miR-652-3p
hsa-miR-652-5p	16.5854	0.240829	0.426635	0.55858	0.576449	0.789682	miR-652-5p
hsa-miR-653-3p	1.74514	-0.459232	0.636043	-0.665116	0.505977		miR-653-3p
hsa-miR-654-3p	15.0853	-4.26372	0.55262	-6.008	1.87825e-09	2.56867e-08	miR-654-3p
hsa-miR-659-5p	3.46016	0.311246	0.598758	0.495834	0.620012	0.81454	miR-659-5p
hsa-miR-660-3p	12.238	0.580824	0.466227	1.23335	0.217446	0.421115	miR-660-3p
hsa-miR-660-5p	3669.52	0.496463	0.136772	3.6298	0.000283638	0.00152706	miR-660-5p
hsa-miR-663a	2.72285	0.400978	0.628691	0.645267	0.518754	0.736736	miR-663a
hsa-miR-664a-3p	30.4607	0.170068	0.42065	0.40187	0.68778	0.851177	miR-664a-3p
hsa-miR-664a-5p	160.191	-0.242517	0.198435	-1.22199	0.221711	0.425855	miR-664a-5p
hsa-miR-664b-3p	4.88712	-0.576087	0.572261	-1.00768	0.313607	0.533816	miR-664b-3p
hsa-miR-664b-5p	18.605	-0.428518	0.403619	-1.06282	0.287866	0.509747	miR-664b-5p
hsa-miR-670-3p	1.96097	1.46524	0.637496	2.50464	0.0122577		miR-670-3p
hsa-miR-671-3p	50.6591	0.814485	0.381473	2.13324	0.0329053	0.0951952	miR-671-3p
hsa-miR-671-5p	625.797	0.505238	0.182149	2.77339	0.0055475	0.0217871	miR-671-5p
hsa-miR-6716-3p	8.87108	-0.010632	0.542882	-0.020557	0.983599	0.986989	miR-6716-3p
hsa-miR-6720-3p	18.4825	-1.01231	0.400462	-2.52947	0.0114234	0.0405588	miR-6720-3p
hsa-miR-6720-5p	3.6541	0.526939	0.619827	0.906262	0.364797	0.590904	miR-6720-5p
hsa-miR-6726-3p	4.82248	-0.155516	0.56947	-0.272514	0.785227	0.896128	miR-6726-3p
hsa-miR-6731-3p	5.7091	0.818964	0.546115	1.47818	0.139361	0.311018	miR-6731-3p
hsa-miR-6731-5p	8.54128	0.534961	0.526922	1.03091	0.302582	0.525223	miR-6731-5p
hsa-miR-6733-3p	3.22937	-0.0522669	0.639987	-0.0845456	0.932623	0.968671	miR-6733-3p
hsa-miR-6733-5p	3.25559	-0.146569	0.631628	-0.231689	0.81678	0.916607	miR-6733-5p
hsa-miR-6734-3p	2.64023	0.0446818	0.635633	0.0673695	0.946288	0.972573	miR-6734-3p
hsa-miR-6734-5p	8.82239	-0.205554	0.513597	-0.400304	0.688933	0.851177	miR-6734-5p
hsa-miR-6739-3p	1.26945	-0.0377592	0.586934	-0.0894746	0.928705		miR-6739-3p
hsa-miR-6747-3p	8.7582	-0.54896	0.535247	-1.03516	0.300593	0.524359	miR-6747-3p
hsa-miR-6750-5p	4.53555	1.12783	0.620006	1.83462	0.0665627	0.171367	miR-6750-5p
hsa-miR-676-3p	8.10247	-0.547195	0.53881	-1.01529	0.309966	0.531194	miR-676-3p
hsa-miR-6764-5p	3.23289	0.640446	0.632957	1.04721	0.295003	0.516679	miR-6764-5p
hsa-miR-6767-5p	2.49431	-0.696714	0.639664	-1.0555	0.291197	0.511779	miR-6767-5p
hsa-miR-6769b-3p	7.7341	-0.0219239	0.520933	-0.0405015	0.967693	0.981657	miR-6769b-3p
hsa-miR-6772-3p	2.58761	0.723679	0.636618	1.07129	0.284039	0.504453	miR-6772-3p
hsa-miR-6775-3p	1.48654	0.125531	0.61741	0.350929	0.725641		miR-6775-3p
hsa-miR-6777-5p	1.99675	-0.494623	0.637695	-0.915179	0.360098		miR-6777-5p
hsa-miR-6779-5p	1.73539	-0.407493	0.629469	-0.683292	0.494422		miR-6779-5p
hsa-miR-6782-3p	1.53892	0.214264	0.631236	0.300387	0.763882		miR-6782-3p
hsa-miR-6783-3p	1.38318	1.0532	0.632125	1.67366	0.0941975		miR-6783-3p
hsa-miR-6786-3p	3.63185	-0.460086	0.618101	-0.77547	0.438062	0.67205	miR-6786-3p
hsa-miR-6787-3p	2.64096	-0.596369	0.642924	-0.967137	0.333476	0.559507	miR-6787-3p
hsa-miR-6802-3p	3.24494	-0.125439	0.61992	-0.200825	0.840835	0.932346	miR-6802-3p
hsa-miR-6803-3p	7.48114	-0.161302	0.550906	-0.292862	0.769628	0.892819	miR-6803-3p
hsa-miR-6808-3p	1.94155	-1.15226	0.640546	-1.95241	0.0508892		miR-6808-3p
hsa-miR-6812-3p	2.54053	0.360186	0.643794	0.557219	0.577378	0.789682	miR-6812-3p
hsa-miR-6821-5p	2.47929	1.10766	0.64136	1.61065	0.107255	0.252176	miR-6821-5p
hsa-miR-6823-5p	9.30884	1.45774	0.500939	2.80519	0.00502873	0.0202011	miR-6823-5p
hsa-miR-6825-5p	2.78098	0.0758121	0.637006	0.119493	0.904885	0.961943	miR-6825-5p
hsa-miR-6832-5p	1.00739	-0.307062	0.592669	-0.471664	0.637167		miR-6832-5p
hsa-miR-6844	3.09588	0.940063	0.637534	1.42577	0.153935	0.334002	miR-6844
hsa-miR-6850-5p	1.47112	-1.44543	0.632736	-1.867	0.0619022		miR-6850-5p
hsa-miR-6851-5p	3.12983	-0.884049	0.633561	-1.40746	0.15929	0.340367	miR-6851-5p
hsa-miR-6852-5p	2.38701	0.797363	0.643395	1.26733	0.205039		miR-6852-5p
hsa-miR-6868-3p	5.73876	0.29261	0.591853	0.498027	0.618465	0.814196	miR-6868-3p
hsa-miR-6869-5p	2.05071	-0.474205	0.644763	-0.684817	0.493459		miR-6869-5p
hsa-miR-6873-3p	2.46923	0.44681	0.631481	0.675118	0.499601	0.727162	miR-6873-3p
hsa-miR-6882-5p	4.40668	0.340916	0.612317	0.573323	0.566426	0.780779	miR-6882-5p
hsa-miR-6885-3p	2.82519	-0.433965	0.635327	-0.699988	0.483935	0.710242	miR-6885-3p
hsa-miR-6892-5p	7.00039	0.14724	0.539342	0.267931	0.788753	0.898029	miR-6892-5p
hsa-miR-6894-5p	1.76135	-0.896839	0.644302	-1.28655	0.198251		miR-6894-5p
hsa-miR-7-1-3p	121.276	0.811867	0.21136	3.83944	0.000123313	0.000734653	miR-7-1-3p
hsa-miR-7-2-3p	3.52894	-0.492696	0.627101	-0.775952	0.437777	0.67205	miR-7-2-3p
hsa-miR-7-5p	2453.46	-0.164703	0.190523	-0.864404	0.387366	0.620315	miR-7-5p
hsa-miR-708-3p	6.13333	-2.7694	0.570294	-4.20865	2.56902e-05	0.000188127	miR-708-3p
hsa-miR-708-5p	63.5038	-3.13107	0.312789	-9.81559	9.64703e-23	5.65155e-21	miR-708-5p
hsa-miR-7114-5p	1.31956	-0.512066	0.606912	-1.04636	0.295396		miR-7114-5p
hsa-miR-744-3p	9.60158	-0.127445	0.500986	-0.255053	0.798682	0.903589	miR-744-3p
hsa-miR-744-5p	794.057	0.364638	0.227479	1.60335	0.108857	0.254242	miR-744-5p
hsa-miR-760	72.9817	-1.06529	0.301583	-3.53024	0.000415178	0.002162	miR-760
hsa-miR-765	8.30067	-0.475921	0.514226	-0.926597	0.354136	0.584407	miR-765
hsa-miR-766-3p	6.56443	0.255727	0.59125	0.417403	0.676384	0.847503	miR-766-3p
hsa-miR-766-5p	9.34815	0.248977	0.490071	0.500706	0.616578	0.813235	miR-766-5p
hsa-miR-769-3p	69.3358	-0.195279	0.25474	-0.7664	0.443439	0.675617	miR-769-3p
hsa-miR-769-5p	421.923	-0.0623636	0.166069	-0.375558	0.707245	0.868341	miR-769-5p
hsa-miR-7706	27.5748	-0.148683	0.359636	-0.414552	0.67847	0.847503	miR-7706
hsa-miR-7851-3p	3.92314	0.218725	0.613609	0.335901	0.736945	0.881076	miR-7851-3p
hsa-miR-7974	4.94885	0.875646	0.571156	1.44399	0.148741	0.324736	miR-7974
hsa-miR-7976	84.8859	-0.32646	0.243598	-1.34011	0.18021	0.371519	miR-7976
hsa-miR-7977	12.2511	-0.0186039	0.448644	-0.0407324	0.967509	0.981657	miR-7977
hsa-miR-802	5.67679	1.29806	0.582613	2.21137	0.0270101	0.080458	miR-802
hsa-miR-873-3p	53.6683	-0.267107	0.301977	-0.884626	0.376358	0.605446	miR-873-3p
hsa-miR-873-5p	211.052	0.820062	0.199629	4.10415	4.05797e-05	0.000282451	miR-873-5p
hsa-miR-874-3p	86.7537	-0.955852	0.243627	-3.92261	8.75951e-05	0.00054017	miR-874-3p
hsa-miR-874-5p	21.4634	-1.02938	0.397771	-2.58632	0.0097007	0.0357047	miR-874-5p
hsa-miR-876-3p	4.71133	1.05476	0.611999	1.65317	0.0982962	0.235844	miR-876-3p
hsa-miR-876-5p	12.5211	1.58233	0.461183	3.34432	0.000824854	0.00394471	miR-876-5p
hsa-miR-877-3p	3.35084	0.619478	0.622268	0.987368	0.323462	0.546852	miR-877-3p
hsa-miR-877-5p	188.993	-0.732962	0.210757	-3.47753	0.000506066	0.002578	miR-877-5p
hsa-miR-887-3p	307.082	0.714421	0.185493	3.8514	0.000117442	0.000705659	miR-887-3p
hsa-miR-887-5p	20.9678	0.296857	0.397669	0.754665	0.45045	0.677489	miR-887-5p
hsa-miR-888-5p	18.6997	-0.129841	0.644503	-0.19409	0.846105	0.934243	miR-888-5p
hsa-miR-891a-5p	25.7311	-0.511861	0.644564	-0.754883	0.450319	0.677489	miR-891a-5p
hsa-miR-891b	5.61551	-0.424887	0.627802	-0.647077	0.517582	0.736559	miR-891b
hsa-miR-892a	13.7514	-0.114457	0.63256	-0.172999	0.862652	0.943757	miR-892a
hsa-miR-892b	5.70843	-0.226358	0.612957	-0.366859	0.713724	0.871213	miR-892b
hsa-miR-9-3p	13.4101	1.25791	0.418611	2.95837	0.00309267	0.013257	miR-9-3p
hsa-miR-9-5p	214.633	0.945632	0.182058	5.19189	2.08166e-07	2.15456e-06	miR-9-5p
hsa-miR-92a-1-5p	7.9811	0.786241	0.517324	1.50441	0.132477	0.297543	miR-92a-1-5p
hsa-miR-92a-2-5p	3.94189	-1.10132	0.614318	-1.73887	0.0820575	0.203121	miR-92a-2-5p
hsa-miR-92a-3p	5216.92	0.464611	0.173657	2.67553	0.00746103	0.028506	miR-92a-3p
hsa-miR-92b-3p	163.736	1.13233	0.233315	4.85091	1.22894e-06	1.15193e-05	miR-92b-3p
hsa-miR-92b-5p	84.9635	0.437936	0.247602	1.76935	0.0768349	0.192224	miR-92b-5p
hsa-miR-93-3p	205.792	0.251957	0.193689	1.30122	0.193183	0.393645	miR-93-3p
hsa-miR-93-5p	129808	-0.347255	0.136729	-2.53974	0.0110936	0.0397898	miR-93-5p
hsa-miR-933	4.93773	0.952358	0.589209	1.57293	0.115736	0.266952	miR-933
hsa-miR-937-3p	12.7701	-0.139152	0.464675	-0.299784	0.764342	0.888153	miR-937-3p
hsa-miR-937-5p	1.89266	0.194704	0.641658	0.266529	0.789832		miR-937-5p
hsa-miR-939-5p	2.42903	-0.305265	0.64249	-0.472899	0.636285		miR-939-5p
hsa-miR-940	2.85214	-0.130244	0.634943	-0.20523	0.837393	0.932346	miR-940
hsa-miR-941	65.8879	-0.186677	0.302643	-0.616482	0.537576	0.751324	miR-941
hsa-miR-942-5p	162.858	-0.0914448	0.19982	-0.457338	0.647428	0.829778	miR-942-5p
hsa-miR-943	5.02173	0.767321	0.590208	1.29219	0.196292	0.397674	miR-943
hsa-miR-95-3p	14.1403	0.319394	0.400031	0.789931	0.429568	0.668112	miR-95-3p
hsa-miR-96-5p	2.49051	0.217058	0.633292	0.313533	0.753876	0.886245	miR-96-5p
hsa-miR-98-3p	112.431	-0.590199	0.249171	-2.36785	0.0178917	0.0582308	miR-98-3p
hsa-miR-98-5p	3512.98	0.0553875	0.183918	0.301146	0.763303	0.888153	miR-98-5p
hsa-miR-9903	9.01826	-0.316944	0.506916	-0.62414	0.532536	0.748674	miR-9903
hsa-miR-9985	29.8267	-1.84412	0.334121	-5.46345	4.66979e-08	5.21089e-07	miR-9985
hsa-miR-99a-3p	55.0666	-0.768721	0.273221	-2.81306	0.00490727	0.0199411	miR-99a-3p
hsa-miR-99a-5p	494.839	-0.799166	0.198	-4.03624	5.43137e-05	0.000356846	miR-99a-5p
hsa-miR-99b-3p	1654.69	-0.494744	0.115132	-4.29718	1.72983e-05	0.000132182	miR-99b-3p
hsa-miR-99b-5p	31488.6	-0.416123	0.119422	-3.4845	0.000493064	0.0025301	miR-99b-5p

## Sheet: mRNA NoDoxAll vs DoxAll
id	gene_name	biotype	chromosome	description	baseMean	log2FoldChange	lfcSE	stat	pvalue	padj
ENSG00000000003	TSPAN6	protein_coding	X	tetraspanin 6	953.381	0.307861	0.133461	2.3067	0.0210717	0.159015
ENSG00000000419	DPM1	protein_coding	20	dolichyl-phosphate mannosyltransferase subunit 1, catalytic	1352.44	0.134974	0.0904749	1.49184	0.13574	0.463256
ENSG00000000457	SCYL3	protein_coding	1	SCY1 like pseudokinase 3	878.081	0.123364	0.0830813	1.48486	0.13758	0.466359
ENSG00000000460	C1orf112	protein_coding	1	chromosome 1 open reading frame 112	767.644	0.0608338	0.154282	0.394298	0.693361	0.890546
ENSG00000000971	CFH	protein_coding	1	complement factor H	24.4997	0.183265	0.273612	0.669407	0.503236	0.799699
ENSG00000001036	FUCA2	protein_coding	6	alpha-L-fucosidase 2	3241.98	-0.0947466	0.0777514	-1.21858	0.223003	0.585954
ENSG00000001084	GCLC	protein_coding	6	glutamate-cysteine ligase catalytic subunit	1592.42	0.117108	0.134803	0.868728	0.384996	0.726447
ENSG00000001167	NFYA	protein_coding	6	nuclear transcription factor Y subunit alpha	2077.15	-0.0270886	0.0799573	-0.338788	0.734769	0.90961
ENSG00000001460	STPG1	protein_coding	1	sperm tail PG-rich repeat containing 1	767.713	-0.0822888	0.0845925	-0.972769	0.330668	0.684866
ENSG00000001461	NIPAL3	protein_coding	1	NIPA like domain containing 3	4914.43	-0.145746	0.214278	-0.680179	0.496391	0.795389
ENSG00000001497	LAS1L	protein_coding	X	LAS1 like ribosome biogenesis factor	2550.34	-0.11306	0.0980998	-1.1525	0.249116	0.612914
ENSG00000001561	ENPP4	protein_coding	6	ectonucleotide pyrophosphatase/phosphodiesterase 4	12.2901	-0.00493365	0.235502	-0.0209776	0.983264	0.996096
ENSG00000001617	SEMA3F	protein_coding	3	semaphorin 3F	7.20063	-0.331723	0.281307	-1.18115	0.237545	0.601038
ENSG00000001629	ANKIB1	protein_coding	7	ankyrin repeat and IBR domain containing 1	3943.49	0.101182	0.122551	0.82563	0.409014	0.74322
ENSG00000001630	CYP51A1	protein_coding	7	cytochrome P450 family 51 subfamily A member 1	890.398	-0.312815	0.119999	-2.60677	0.00914015	0.0904412
ENSG00000001631	KRIT1	protein_coding	7	KRIT1 ankyrin repeat containing	615.57	0.282759	0.0931246	3.03631	0.0023949	0.0347353
ENSG00000002016	RAD52	protein_coding	12	RAD52 homolog, DNA repair protein	893.696	0.0784397	0.11595	0.676499	0.498724	0.796671
ENSG00000002079	MYH16	transcribed_unitary_pseudogene	7	myosin heavy chain 16 pseudogene	15.4516	-0.456458	0.231169	-2.17337	0.0297523	0.199465
ENSG00000002330	BAD	protein_coding	11	BCL2 associated agonist of cell death	2911.09	-0.119717	0.136113	-0.879543	0.379107	0.72193
ENSG00000002549	LAP3	protein_coding	4	leucine aminopeptidase 3	4587.7	-0.240413	0.232626	-1.03351	0.301364	0.661609
ENSG00000002586	CD99	protein_coding	X	CD99 molecule (Xg blood group)	35178	0.0521129	0.207193	0.251516	0.801415	0.937545
ENSG00000002587	HS3ST1	protein_coding	4	heparan sulfate-glucosamine 3-sulfotransferase 1	15.3543	-0.784658	0.271314	-3.00795	0.0026302	0.0370869
ENSG00000002746	HECW1	protein_coding	7	HECT, C2 and WW domain containing E3 ubiquitin protein ligase 1	6.79138	0.171805	0.225237	0.775642	0.437961	0.763143
ENSG00000002822	MAD1L1	protein_coding	7	mitotic arrest deficient 1 like 1	844.47	-0.0440366	0.269949	-0.16313	0.870416	0.959822
ENSG00000002834	LASP1	protein_coding	17	LIM and SH3 protein 1	25939.1	0.0241905	0.255237	0.094776	0.924493	0.977673
ENSG00000002919	SNX11	protein_coding	17	sorting nexin 11	1494.78	-0.1408	0.066057	-2.1315	0.0330483	0.213249
ENSG00000003056	M6PR	protein_coding	12	mannose-6-phosphate receptor, cation dependent	9184.13	0.106952	0.20329	0.526105	0.598816	0.844821
ENSG00000003096	KLHL13	protein_coding	X	kelch like family member 13	173.394	0.13559	0.267518	0.506825	0.612278	0.851779
ENSG00000003137	CYP26B1	protein_coding	2	cytochrome P450 family 26 subfamily B member 1	7.68388	0.00884621	0.281258	0.0314568	0.974905	0.994134
ENSG00000003147	ICA1	protein_coding	7	islet cell autoantigen 1	943.903	0.111902	0.177696	0.629743	0.528863	0.813041
ENSG00000003249	DBNDD1	protein_coding	16	dysbindin domain containing 1	2310.94	-0.105446	0.198444	-0.531362	0.595168	0.842726
ENSG00000003393	ALS2	protein_coding	2	alsin Rho guanine nucleotide exchange factor ALS2	3481.84	0.108811	0.119078	0.913773	0.360836	0.708514
ENSG00000003400	CASP10	protein_coding	2	caspase 10	9.936	0.564516	0.277354	2.03059	0.0422965	0.248112
ENSG00000003402	CFLAR	protein_coding	2	CASP8 and FADD like apoptosis regulator	3992.79	0.213843	0.158714	1.34735	0.177868	0.529473
ENSG00000003436	TFPI	protein_coding	2	tissue factor pathway inhibitor	574.168	0.00939269	0.226164	0.0415301	0.966873	0.99271
ENSG00000003509	NDUFAF7	protein_coding	2	NADH:ubiquinone oxidoreductase complex assembly factor 7	1389.37	0.303189	0.129852	2.33488	0.0195499	0.152353
ENSG00000003756	RBM5	protein_coding	3	RNA binding motif protein 5	11981.1	0.281858	0.179606	1.56933	0.116572	0.431186
ENSG00000003989	SLC7A2	protein_coding	8	solute carrier family 7 member 2	504.406	0.262628	0.265771	0.988357	0.322978	0.679499
ENSG00000004059	ARF5	protein_coding	7	ADP ribosylation factor 5	5834.07	-0.054458	0.102016	-0.533821	0.593466	0.842354
ENSG00000004139	SARM1	protein_coding	17	sterile alpha and TIR motif containing 1	1702.03	-0.0156022	0.106137	-0.147001	0.883131	0.96399
ENSG00000004142	POLDIP2	protein_coding	17	DNA polymerase delta interacting protein 2	6436.17	-0.241414	0.10258	-2.35341	0.0186021	0.14781
ENSG00000004399	PLXND1	protein_coding	3	plexin D1	13825.3	0.181278	0.275762	0.658533	0.510196	0.802611
ENSG00000004455	AK2	protein_coding	1	adenylate kinase 2	8192.06	0.0547693	0.152884	0.358239	0.720165	0.903157
ENSG00000004468	CD38	protein_coding	4	CD38 molecule	4.23289	0.497	0.262293	1.92769	0.0538938	0.286039
ENSG00000004478	FKBP4	protein_coding	12	FKBP prolyl isomerase 4	5055.21	-0.114778	0.156536	-0.733235	0.463415	0.777036
ENSG00000004487	KDM1A	protein_coding	1	lysine demethylase 1A	4267.11	0.0521096	0.0567164	0.918775	0.358213	0.706501
ENSG00000004534	RBM6	protein_coding	3	RNA binding motif protein 6	7670.71	0.164244	0.0762089	2.15518	0.0311474	0.205775
ENSG00000004660	CAMKK1	protein_coding	17	calcium/calmodulin dependent protein kinase kinase 1	309.147	0.0944463	0.280501	0.336774	0.736287	0.910767
ENSG00000004700	RECQL	protein_coding	12	RecQ like helicase	4384.64	0.0889546	0.0836053	1.06398	0.287337	0.648427
ENSG00000004766	VPS50	protein_coding	7	VPS50 subunit of EARP/GARPII complex	1230.74	0.369817	0.0965214	3.8314	0.000127418	0.00325738
ENSG00000004776	HSPB6	protein_coding	19	heat shock protein family B (small) member 6	144.724	0.353307	0.131362	2.68917	0.00716292	0.076542
ENSG00000004777	ARHGAP33	protein_coding	19	Rho GTPase activating protein 33	667.503	0.0817322	0.121429	0.673091	0.500889	0.798228
ENSG00000004779	NDUFAB1	protein_coding	16	NADH:ubiquinone oxidoreductase subunit AB1	2701.3	-0.133813	0.109368	-1.22351	0.221137	0.583532
ENSG00000004799	PDK4	protein_coding	7	pyruvate dehydrogenase kinase 4	2737.99	0.34641	0.276504	1.26048	0.207495	0.566325
ENSG00000004838	ZMYND10	protein_coding	3	zinc finger MYND-type containing 10	52.2509	0.0418099	0.198939	0.210127	0.833569	0.948898
ENSG00000004846	ABCB5	protein_coding	7	ATP binding cassette subfamily B member 5	7226.62	0.257567	0.28135	0.916614	0.359345	0.707394
ENSG00000004864	SLC25A13	protein_coding	7	solute carrier family 25 member 13	2832.07	0.182813	0.118122	1.54765	0.121706	0.440534
ENSG00000004866	ST7	protein_coding	7	suppression of tumorigenicity 7	1328.91	-0.0282155	0.216588	-0.130274	0.896349	0.968259
ENSG00000004897	CDC27	protein_coding	17	cell division cycle 27	3955.68	0.0144543	0.0958739	0.150763	0.880163	0.963303
ENSG00000004961	HCCS	protein_coding	X	holocytochrome c synthase	1556.09	-0.104989	0.0867088	-1.21083	0.225962	0.58948
ENSG00000004975	DVL2	protein_coding	17	dishevelled segment polarity protein 2	4465.1	0.0154462	0.111951	0.137972	0.890262	0.966669
ENSG00000005001	PRSS22	protein_coding	16	serine protease 22	11.9308	-2.27887	0.277688	-6.55767	5.46548e-11	5.18696e-09
ENSG00000005007	UPF1	protein_coding	19	UPF1 RNA helicase and ATPase	8362.49	-0.0574694	0.058264	-0.986362	0.323955	0.68011
ENSG00000005020	SKAP2	protein_coding	7	src kinase associated phosphoprotein 2	1203.17	0.157781	0.135785	1.16199	0.24524	0.608908
ENSG00000005022	SLC25A5	protein_coding	X	solute carrier family 25 member 5	14769.6	-0.0628953	0.203074	-0.309718	0.756776	0.919492
ENSG00000005059	MCUB	protein_coding	4	mitochondrial calcium uniporter dominant negative subunit beta	557.075	-0.00792992	0.178117	-0.0445206	0.964489	0.991737
ENSG00000005075	POLR2J	protein_coding	7	RNA polymerase II subunit J	2273.35	-0.162736	0.0631465	-2.57712	0.00996282	0.0951138
ENSG00000005100	DHX33	protein_coding	17	DEAH-box helicase 33	3050.23	-0.146142	0.200791	-0.727832	0.466716	0.779198
ENSG00000005108	THSD7A	protein_coding	7	thrombospondin type 1 domain containing 7A	41.5893	0.1783	0.230265	0.774208	0.438808	0.763652
ENSG00000005156	LIG3	protein_coding	17	DNA ligase 3	1642.93	-0.145701	0.195892	-0.743779	0.45701	0.773116
ENSG00000005175	RPAP3	protein_coding	12	RNA polymerase II associated protein 3	1170.25	-0.036979	0.150282	-0.246064	0.805633	0.939107
ENSG00000005187	ACSM3	protein_coding	16	acyl-CoA synthetase medium chain family member 3	40.45	0.121453	0.24156	0.502707	0.61517	0.853105
ENSG00000005189	REXO5	protein_coding	16	RNA exonuclease 5	219.556	0.0190611	0.160499	0.118758	0.905467	0.971876
ENSG00000005194	CIAPIN1	protein_coding	16	cytokine induced apoptosis inhibitor 1	3822.76	-0.0610285	0.0816867	-0.747104	0.455001	0.772254
ENSG00000005206	SPPL2B	protein_coding	19	signal peptide peptidase like 2B	1858.15	-0.0554868	0.142203	-0.390196	0.696392	0.892577
ENSG00000005238	FAM214B	protein_coding	9	family with sequence similarity 214 member B	4886.75	-0.301973	0.0876543	-3.44503	0.00057099	0.0112914
ENSG00000005243	COPZ2	protein_coding	17	COPI coat complex subunit zeta 2	885.107	0.137414	0.221897	0.619283	0.53573	0.816034
ENSG00000005249	PRKAR2B	protein_coding	7	protein kinase cAMP-dependent type II regulatory subunit beta	448.373	-0.172437	0.195499	-0.882008	0.377772	0.721255
ENSG00000005302	MSL3	protein_coding	X	MSL complex subunit 3	2022.67	0.0995476	0.0639182	1.55742	0.119371	0.436422
ENSG00000005339	CREBBP	protein_coding	16	CREB binding protein	6325.24	0.130403	0.113658	1.14733	0.251244	0.614283
ENSG00000005379	TSPOAP1	protein_coding	17	TSPO associated protein 1	61.909	0.164746	0.26901	0.612629	0.540122	0.81875
ENSG00000005436	GCFC2	protein_coding	2	GC-rich sequence DNA-binding factor 2	649.692	0.376602	0.171323	2.19818	0.0279363	0.191374
ENSG00000005448	WDR54	protein_coding	2	WD repeat domain 54	1131.31	-0.416392	0.103192	-4.035	5.46016e-05	0.00157251
ENSG00000005469	CROT	protein_coding	7	carnitine O-octanoyltransferase	595.615	0.0199827	0.117013	0.170771	0.864404	0.957715
ENSG00000005471	ABCB4	protein_coding	7	ATP binding cassette subfamily B member 4	1436.94	0.378701	0.274315	1.38179	0.167036	0.512464
ENSG00000005483	KMT2E	protein_coding	7	lysine methyltransferase 2E (inactive)	6111.42	0.0942404	0.0890651	1.05811	0.290006	0.651601
ENSG00000005486	RHBDD2	protein_coding	7	rhomboid domain containing 2	3308.38	-0.0776295	0.196541	-0.394979	0.692858	0.890176
ENSG00000005513	SOX8	protein_coding	16	SRY-box transcription factor 8	3290.49	-0.126784	0.277523	-0.457182	0.64754	0.868176
ENSG00000005700	IBTK	protein_coding	6	inhibitor of Bruton tyrosine kinase	3312.81	0.13052	0.0870946	1.4986	0.133977	0.460489
ENSG00000005801	ZNF195	protein_coding	11	zinc finger protein 195	760.787	0.137403	0.0811676	1.69282	0.0904902	0.379413
ENSG00000005810	MYCBP2	protein_coding	13	MYC binding protein 2	10122	0.12002	0.181719	0.660469	0.508953	0.801795
ENSG00000005812	FBXL3	protein_coding	13	F-box and leucine rich repeat protein 3	2106.05	0.183882	0.167037	1.10085	0.270963	0.632233
ENSG00000005844	ITGAL	protein_coding	16	integrin subunit alpha L	7.02705	0.312754	0.256251	1.23633	0.216335	0.577923
ENSG00000005882	PDK2	protein_coding	17	pyruvate dehydrogenase kinase 2	2683.3	0.0144828	0.111142	0.130309	0.896322	0.968259
ENSG00000005884	ITGA3	protein_coding	17	integrin subunit alpha 3	26760.5	-0.909125	0.159422	-5.70276	1.17885e-08	8.0862e-07
ENSG00000005889	ZFX	protein_coding	X	zinc finger protein X-linked	1518.28	0.207277	0.0884967	2.34218	0.0191712	0.150478
ENSG00000005893	LAMP2	protein_coding	X	lysosomal associated membrane protein 2	21115	0.368704	0.257378	1.43296	0.15187	0.4893
ENSG00000005961	ITGA2B	protein_coding	17	integrin subunit alpha 2b	31.5978	0.082004	0.252916	0.324181	0.745801	0.914346
ENSG00000006007	GDE1	protein_coding	16	glycerophosphodiester phosphodiesterase 1	6288.94	0.0706542	0.0802466	0.880462	0.378609	0.721594
ENSG00000006015	REX1BD	protein_coding	19	required for excision 1-B domain containing	1866.42	-0.25087	0.202104	-1.24129	0.214497	0.575612
ENSG00000006016	CRLF1	protein_coding	19	cytokine receptor like factor 1	3.82251	0.183704	0.253666	0.726775	0.467364	0.779746
ENSG00000006025	OSBPL7	protein_coding	17	oxysterol binding protein like 7	1280.56	0.00863659	0.124503	0.0693684	0.944696	0.984534
ENSG00000006042	TMEM98	protein_coding	17	transmembrane protein 98	5349.74	0.181821	0.158466	1.14738	0.251225	0.614283
ENSG00000006047	YBX2	protein_coding	17	Y-box binding protein 2	21.2202	0.690856	0.235328	2.92365	0.00345952	0.0454411
ENSG00000006062	MAP3K14	protein_coding	17	mitogen-activated protein kinase kinase kinase 14	1197.2	-0.0739741	0.190886	-0.387535	0.69836	0.893285
ENSG00000006118	TMEM132A	protein_coding	11	transmembrane protein 132A	5161.1	0.0753251	0.239609	0.314923	0.75282	0.917742
ENSG00000006125	AP2B1	protein_coding	17	adaptor related protein complex 2 subunit beta 1	18701.7	0.052145	0.0571696	0.912109	0.361711	0.709428
ENSG00000006128	TAC1	protein_coding	7	tachykinin precursor 1	306.429	-0.132335	0.247308	-0.53735	0.591026	0.841789
ENSG00000006194	ZNF263	protein_coding	16	zinc finger protein 263	2144.93	-0.0442577	0.0708867	-0.624343	0.532402	0.814498
ENSG00000006210	CX3CL1	protein_coding	16	C-X3-C motif chemokine ligand 1	143.836	-0.757515	0.271621	-2.79521	0.00518653	0.0607648
ENSG00000006282	SPATA20	protein_coding	17	spermatogenesis associated 20	4734.05	-0.222075	0.150595	-1.47465	0.140307	0.470951
ENSG00000006327	TNFRSF12A	protein_coding	16	TNF receptor superfamily member 12A	5513.21	-0.416183	0.277877	-1.50007	0.133597	0.459971
ENSG00000006432	MAP3K9	protein_coding	14	mitogen-activated protein kinase kinase kinase 9	145.646	-0.880405	0.126362	-6.96111	3.37611e-12	3.81353e-10
ENSG00000006451	RALA	protein_coding	7	RAS like proto-oncogene A	2451.68	0.155694	0.0676748	2.30061	0.0214134	0.160728
ENSG00000006453	BAIAP2L1	protein_coding	7	BAR/IMD domain containing adaptor protein 2 like 1	1696.44	-0.0290012	0.122277	-0.237177	0.812519	0.941015
ENSG00000006459	KDM7A	protein_coding	7	lysine demethylase 7A	808.319	0.274648	0.108329	2.53528	0.0112358	0.103011
ENSG00000006468	ETV1	protein_coding	7	ETS variant transcription factor 1	2150.35	-0.548844	0.256762	-2.13886	0.0324471	0.210843
ENSG00000006530	AGK	protein_coding	7	acylglycerol kinase	1581.72	-0.0741514	0.0442207	-1.67685	0.0935721	0.3861
ENSG00000006534	ALDH3B1	protein_coding	11	aldehyde dehydrogenase 3 family member B1	1503.69	0.30871	0.236593	1.30492	0.19192	0.547601
ENSG00000006576	PHTF2	protein_coding	7	putative homeodomain transcription factor 2	1711.59	0.395322	0.0823673	4.79944	1.59108e-06	7.1733e-05
ENSG00000006607	FARP2	protein_coding	2	FERM, ARH/RhoGEF and pleckstrin domain protein 2	11002.1	0.0811106	0.202459	0.400626	0.688695	0.887845
ENSG00000006625	GGCT	protein_coding	7	gamma-glutamylcyclotransferase	1359.2	0.0073623	0.26644	0.0276297	0.977958	0.994844
ENSG00000006634	DBF4	protein_coding	7	DBF4 zinc finger	695.131	0.04142	0.191061	0.216787	0.828374	0.946979
ENSG00000006638	TBXA2R	protein_coding	19	thromboxane A2 receptor	109.615	0.0374818	0.243159	0.15415	0.877491	0.962891
ENSG00000006652	IFRD1	protein_coding	7	interferon related developmental regulator 1	331.034	0.452586	0.197813	2.28787	0.0221448	0.164511
ENSG00000006695	COX10	protein_coding	17	cytochrome c oxidase assembly factor heme A:farnesyltransferase COX10	612.989	-0.0585863	0.124101	-0.472085	0.636866	0.863871
ENSG00000006704	GTF2IRD1	protein_coding	7	GTF2I repeat domain containing 1	1505.97	0.211041	0.0972561	2.16995	0.0300103	0.200687
ENSG00000006712	PAF1	protein_coding	19	PAF1 homolog, Paf1/RNA polymerase II complex component	4998.42	-0.136254	0.103546	-1.31588	0.188215	0.543086
ENSG00000006715	VPS41	protein_coding	7	VPS41 subunit of HOPS complex	7288.34	0.291206	0.0948745	3.06937	0.00214508	0.0317998
ENSG00000006744	ELAC2	protein_coding	17	elaC ribonuclease Z 2	5479.89	-0.120173	0.134502	-0.893465	0.371608	0.717466
ENSG00000006747	SCIN	protein_coding	7	scinderin	189.843	-0.0699178	0.239318	-0.292587	0.769838	0.924647
ENSG00000006756	ARSD	protein_coding	X	arylsulfatase D	1606.08	0.278366	0.164213	1.69516	0.0900455	0.378388
ENSG00000006757	PNPLA4	protein_coding	X	patatin like phospholipase domain containing 4	528.797	-0.110601	0.0702399	-1.57462	0.115343	0.428276
ENSG00000006831	ADIPOR2	protein_coding	12	adiponectin receptor 2	9888.36	0.112892	0.183321	0.615814	0.538017	0.816931
ENSG00000006837	CDKL3	protein_coding	5	cyclin dependent kinase like 3	53.7293	0.10172	0.216618	0.469595	0.638644	0.86456
ENSG00000007001	UPP2	protein_coding	2	uridine phosphorylase 2	2.62546	0.212822	0.237459	0.902227	0.366937	0.713129
ENSG00000007038	PRSS21	protein_coding	16	serine protease 21	6.64797	-0.338344	0.261257	-1.31204	0.189506	0.544951
ENSG00000007047	MARK4	protein_coding	19	microtubule affinity regulating kinase 4	2957.22	-0.00348629	0.0844464	-0.0412845	0.967069	0.992723
ENSG00000007062	PROM1	protein_coding	4	prominin 1	21.1344	0.084336	0.252296	0.334616	0.737915	0.911398
ENSG00000007080	CCDC124	protein_coding	19	coiled-coil domain containing 124	3203.53	-0.284996	0.101873	-2.79755	0.00514915	0.0604975
ENSG00000007168	PAFAH1B1	protein_coding	17	platelet activating factor acetylhydrolase 1b regulatory subunit 1	10341.2	0.0598636	0.0778385	0.769074	0.44185	0.765283
ENSG00000007171	NOS2	protein_coding	17	nitric oxide synthase 2	15.4534	-1.92032	0.275124	-6.58687	4.4921e-11	4.30248e-09
ENSG00000007174	DNAH9	protein_coding	17	dynein axonemal heavy chain 9	5.09234	-0.180438	0.202778	-0.918967	0.358113	0.706501
ENSG00000007202	KIAA0100	protein_coding	17	KIAA0100	19405.2	-0.0658173	0.125575	-0.524129	0.600189	0.845545
ENSG00000007237	GAS7	protein_coding	17	growth arrest specific 7	48538.6	0.127877	0.27186	0.470933	0.637688	0.864148
ENSG00000007255	TRAPPC6A	protein_coding	19	trafficking protein particle complex 6A	805.87	0.134108	0.115034	1.1658	0.243695	0.607608
ENSG00000007264	MATK	protein_coding	19	megakaryocyte-associated tyrosine kinase	24.461	-0.177344	0.273052	-0.650128	0.515609	0.80496
ENSG00000007312	CD79B	protein_coding	17	CD79b molecule	806.747	0.0336795	0.177981	0.189229	0.849914	0.953504
ENSG00000007341	ST7L	protein_coding	1	suppression of tumorigenicity 7 like	923.474	0.0871261	0.0914655	0.952548	0.340819	0.691881
ENSG00000007350	TKTL1	protein_coding	X	transketolase like 1	18.6622	-0.634933	0.253233	-2.49933	0.0124427	0.111182
ENSG00000007376	RPUSD1	protein_coding	16	RNA pseudouridine synthase domain containing 1	1655.72	-0.309262	0.172899	-1.78867	0.0736681	0.338593
ENSG00000007384	RHBDF1	protein_coding	16	rhomboid 5 homolog 1	7333.02	-0.122927	0.267934	-0.458829	0.646357	0.867598
ENSG00000007392	LUC7L	protein_coding	16	LUC7 like	3357.89	0.158072	0.0586875	2.69345	0.00707159	0.075839
ENSG00000007516	BAIAP3	protein_coding	16	BAI1 associated protein 3	47.5367	-0.616479	0.276783	-2.23242	0.0255869	0.180577
ENSG00000007520	TSR3	protein_coding	16	TSR3 ribosome maturation factor	2854.56	-0.149679	0.0906849	-1.65054	0.0988325	0.395254
ENSG00000007541	PIGQ	protein_coding	16	phosphatidylinositol glycan anchor biosynthesis class Q	3278.14	-0.0733986	0.162299	-0.452243	0.651094	0.869615
ENSG00000007545	CRAMP1	protein_coding	16	cramped chromatin regulator homolog 1	1174.41	0.112236	0.069793	1.60813	0.107806	0.413251
ENSG00000007866	TEAD3	protein_coding	6	TEA domain transcription factor 3	1230.81	0.0844254	0.103215	0.817957	0.413382	0.746213
ENSG00000007923	DNAJC11	protein_coding	1	DnaJ heat shock protein family (Hsp40) member C11	3801.02	-0.180691	0.120786	-1.49596	0.134664	0.461935
ENSG00000007944	MYLIP	protein_coding	6	myosin regulatory light chain interacting protein	1497.66	0.412557	0.0806934	5.11258	3.17794e-07	1.65956e-05
ENSG00000007968	E2F2	protein_coding	1	E2F transcription factor 2	311.346	-0.0583749	0.255539	-0.228428	0.819314	0.944303
ENSG00000008018	PSMB1	protein_coding	6	proteasome 20S subunit beta 1	5753.47	-0.0300555	0.0610157	-0.492586	0.622305	0.856612
ENSG00000008056	SYN1	protein_coding	X	synapsin I	6.97512	-0.125927	0.266792	-0.473299	0.636	0.86368
ENSG00000008083	JARID2	protein_coding	6	jumonji and AT-rich interaction domain containing 2	3427.85	-0.00240376	0.0920082	-0.026126	0.979157	0.994956
ENSG00000008086	CDKL5	protein_coding	X	cyclin dependent kinase like 5	1980.07	0.476929	0.2687	1.77663	0.0756295	0.343292
ENSG00000008118	CAMK1G	protein_coding	1	calcium/calmodulin dependent protein kinase IG	4.54056	0.103002	0.228313	0.451819	0.6514	0.869715
ENSG00000008128	CDK11A	protein_coding	1	cyclin dependent kinase 11A	1168.57	0.0626156	0.0908849	0.688952	0.490853	0.79246
ENSG00000008130	NADK	protein_coding	1	NAD kinase	4045.98	-0.0504287	0.129793	-0.38853	0.697624	0.892825
ENSG00000008226	DLEC1	protein_coding	3	DLEC1 cilia and flagella associated protein	7.70512	0.0221736	0.281124	0.0789871	0.937043	0.981878
ENSG00000008256	CYTH3	protein_coding	7	cytohesin 3	15939.2	0.0424293	0.240549	0.176383	0.859993	0.956825
ENSG00000008277	ADAM22	protein_coding	7	ADAM metallopeptidase domain 22	285.891	0.22996	0.158053	1.45493	0.14569	0.479419
ENSG00000008282	SYPL1	protein_coding	7	synaptophysin like 1	3584.32	0.0875378	0.120383	0.727161	0.467127	0.779508
ENSG00000008283	CYB561	protein_coding	17	cytochrome b561	1165.29	0.050725	0.21521	0.235696	0.813669	0.941556
ENSG00000008294	SPAG9	protein_coding	17	sperm associated antigen 9	10689.6	0.000860079	0.0811524	0.0105978	0.991544	0.99857
ENSG00000008300	CELSR3	protein_coding	3	cadherin EGF LAG seven-pass G-type receptor 3	396.912	0.092418	0.277781	0.332735	0.739335	0.911891
ENSG00000008311	AASS	protein_coding	7	aminoadipate-semialdehyde synthase	3837.93	0.242131	0.0714557	3.38854	0.000702659	0.0132283
ENSG00000008323	PLEKHG6	protein_coding	12	pleckstrin homology and RhoGEF domain containing G6	13.9946	-0.0496562	0.267903	-0.185413	0.852905	0.954438
ENSG00000008324	SS18L2	protein_coding	3	SS18 like 2	512.016	-0.0213962	0.161908	-0.132148	0.894867	0.967736
ENSG00000008382	MPND	protein_coding	19	MPN domain containing	936.282	0.158918	0.107929	1.47242	0.140908	0.471989
ENSG00000008394	MGST1	protein_coding	12	microsomal glutathione S-transferase 1	321.292	-0.190926	0.241707	-0.789874	0.429601	0.757823
ENSG00000008405	CRY1	protein_coding	12	cryptochrome circadian regulator 1	1003.25	0.0684414	0.137382	0.498184	0.618354	0.855068
ENSG00000008441	NFIX	protein_coding	19	nuclear factor I X	4853.6	0.150385	0.193437	0.777442	0.436898	0.762361
ENSG00000008513	ST3GAL1	protein_coding	8	ST3 beta-galactoside alpha-2,3-sialyltransferase 1	3539.77	0.250197	0.103597	2.4151	0.0157311	0.131413
ENSG00000008517	IL32	protein_coding	16	interleukin 32	6.22728	0.134547	0.170023	0.834105	0.404222	0.740484
ENSG00000008710	PKD1	protein_coding	16	polycystin 1, transient receptor potential channel interacting	9447.35	-0.0765722	0.130622	-0.586213	0.557732	0.826989
ENSG00000008735	MAPK8IP2	protein_coding	22	mitogen-activated protein kinase 8 interacting protein 2	99.3792	0.306033	0.174445	1.75409	0.0794151	0.353067
ENSG00000008838	MED24	protein_coding	17	mediator complex subunit 24	4972.95	-0.118205	0.0600192	-1.96945	0.0489019	0.269735
ENSG00000008853	RHOBTB2	protein_coding	8	Rho related BTB domain containing 2	2072.7	-0.259097	0.195422	-1.32584	0.184894	0.538459
ENSG00000008869	HEATR5B	protein_coding	2	HEAT repeat containing 5B	2790.82	0.170835	0.0960862	1.77793	0.0754152	0.343222
ENSG00000008952	SEC62	protein_coding	3	SEC62 homolog, preprotein translocation factor	5079.1	0.0877486	0.0756682	1.15965	0.246192	0.609585
ENSG00000008988	RPS20	protein_coding	8	ribosomal protein S20	29398.7	0.0963579	0.088149	1.09313	0.274339	0.635861
ENSG00000009307	CSDE1	protein_coding	1	cold shock domain containing E1	27111.6	0.163541	0.0957773	1.70752	0.0877263	0.373746
ENSG00000009335	UBE3C	protein_coding	7	ubiquitin protein ligase E3C	6973.76	-0.130612	0.0674591	-1.93616	0.0528476	0.282652
ENSG00000009413	REV3L	protein_coding	6	REV3 like, DNA directed polymerase zeta catalytic subunit	3825.31	0.36812	0.211276	1.74241	0.0814361	0.358523
ENSG00000009694	TENM1	protein_coding	X	teneurin transmembrane protein 1	5.74251	0.0376292	0.265144	0.141798	0.88724	0.965314
ENSG00000009780	FAM76A	protein_coding	1	family with sequence similarity 76 member A	470.593	0.233006	0.193195	1.20602	0.22781	0.59099
ENSG00000009830	POMT2	protein_coding	14	protein O-mannosyltransferase 2	3981.83	0.14806	0.236292	0.626609	0.530916	0.81388
ENSG00000009844	VTA1	protein_coding	6	vesicle trafficking 1	2263.6	0.122128	0.0933098	1.30884	0.190589	0.546158
ENSG00000009954	BAZ1B	protein_coding	7	bromodomain adjacent to zinc finger domain 1B	9181.4	-0.0841462	0.0706336	-1.19131	0.233534	0.597626
ENSG00000010017	RANBP9	protein_coding	6	RAN binding protein 9	3578.85	0.172189	0.0836459	2.05854	0.0395385	0.238332
ENSG00000010030	ETV7	protein_coding	6	ETS variant transcription factor 7	118.959	-0.146922	0.255794	-0.57436	0.565724	0.829138
ENSG00000010072	SPRTN	protein_coding	1	SprT-like N-terminal domain	861.855	0.218692	0.0845051	2.58791	0.00965613	0.093738
ENSG00000010165	EEF1AKNMT	protein_coding	1	eEF1A lysine and N-terminal methyltransferase	2993.29	-0.199673	0.141649	-1.40963	0.158649	0.499689
ENSG00000010219	DYRK4	protein_coding	12	dual specificity tyrosine phosphorylation regulated kinase 4	910.754	0.0140019	0.0519021	0.269775	0.787333	0.931356
ENSG00000010244	ZNF207	protein_coding	17	zinc finger protein 207	7703.89	-0.0954828	0.0512944	-1.86147	0.0626784	0.310464
ENSG00000010256	UQCRC1	protein_coding	3	ubiquinol-cytochrome c reductase core protein 1	11316	-0.305795	0.0841792	-3.63266	0.00028051	0.00626895
ENSG00000010270	STARD3NL	protein_coding	7	STARD3 N-terminal like	2960.16	0.0722403	0.0698574	1.03411	0.301085	0.661609
ENSG00000010278	CD9	protein_coding	12	CD9 molecule	11481.2	0.0246732	0.272408	0.0905748	0.92783	0.978793
ENSG00000010292	NCAPD2	protein_coding	12	non-SMC condensin I complex subunit D2	8313.27	-0.105657	0.108836	-0.970789	0.331654	0.685402
ENSG00000010295	IFFO1	protein_coding	12	intermediate filament family orphan 1	5044.67	0.0446606	0.130344	0.342636	0.731873	0.908163
ENSG00000010310	GIPR	protein_coding	19	gastric inhibitory polypeptide receptor	303.021	0.234447	0.136499	1.71757	0.0858742	0.369298
ENSG00000010318	PHF7	protein_coding	3	PHD finger protein 7	194.076	0.152592	0.104259	1.46353	0.143323	0.475849
ENSG00000010319	SEMA3G	protein_coding	3	semaphorin 3G	8.80592	-0.0135693	0.281342	-0.0481808	0.961572	0.990942
ENSG00000010322	NISCH	protein_coding	3	nischarin	8071.82	0.0678251	0.145396	0.466483	0.640869	0.865058
ENSG00000010327	STAB1	protein_coding	3	stabilin 1	5.08391	-0.24555	0.272218	-0.90416	0.365911	0.71227
ENSG00000010361	FUZ	protein_coding	19	fuzzy planar cell polarity protein	1053.92	-0.178148	0.167499	-1.06357	0.287525	0.64871
ENSG00000010379	SLC6A13	protein_coding	12	solute carrier family 6 member 13	6.00313	0.0959685	0.270888	0.355292	0.722371	0.903416
ENSG00000010404	IDS	protein_coding	X	iduronate 2-sulfatase	825.454	-0.209071	0.114837	-1.8206	0.0686673	0.326511
ENSG00000010438	PRSS3	protein_coding	9	serine protease 3	92.5598	-1.71375	0.256389	-6.68471	2.31375e-11	2.2791e-09
ENSG00000010539	ZNF200	protein_coding	16	zinc finger protein 200	563.232	0.127823	0.0947789	1.34863	0.177455	0.528854
ENSG00000010610	CD4	protein_coding	12	CD4 molecule	216.936	0.457569	0.268203	1.70751	0.087727	0.373746
ENSG00000010626	LRRC23	protein_coding	12	leucine rich repeat containing 23	435.568	0.216992	0.0940331	2.3076	0.0210215	0.158856
ENSG00000010671	BTK	protein_coding	X	Bruton tyrosine kinase	6.486	0.0698577	0.170647	0.41415	0.678764	0.88326
ENSG00000010704	HFE	protein_coding	6	homeostatic iron regulator	994.422	-0.116253	0.107715	-1.07927	0.280468	0.641423
ENSG00000010803	SCMH1	protein_coding	1	Scm polycomb group protein homolog 1	2148.84	0.131821	0.134245	0.981942	0.326129	0.681232
ENSG00000010810	FYN	protein_coding	6	FYN proto-oncogene, Src family tyrosine kinase	12119	0.207461	0.192454	1.07799	0.28104	0.642307
ENSG00000010818	HIVEP2	protein_coding	6	HIVEP zinc finger 2	2947.53	-0.074308	0.130337	-0.570122	0.568595	0.830301
ENSG00000011007	ELOA	protein_coding	1	elongin A	4721.87	-0.0215273	0.146169	-0.147278	0.882913	0.96399
ENSG00000011009	LYPLA2	protein_coding	1	lysophospholipase 2	4478.78	-0.184589	0.151116	-1.22151	0.221895	0.584241
ENSG00000011021	CLCN6	protein_coding	1	chloride voltage-gated channel 6	3162.16	0.138021	0.0899257	1.53483	0.124827	0.445964
ENSG00000011028	MRC2	protein_coding	17	mannose receptor C type 2	1619.96	-0.946828	0.219489	-4.31506	1.59557e-05	0.00055276
ENSG00000011052	NME1-NME2	protein_coding	17	NME1-NME2 readthrough	50.3253	-0.0573431	0.244757	-0.234219	0.814815	0.94241
ENSG00000011105	TSPAN9	protein_coding	12	tetraspanin 9	2352.7	0.103686	0.190292	0.54488	0.585836	0.838344
ENSG00000011114	BTBD7	protein_coding	14	BTB domain containing 7	2749.78	0.217008	0.0965961	2.24655	0.0246686	0.176129
ENSG00000011132	APBA3	protein_coding	19	amyloid beta precursor protein binding family A member 3	974.868	-0.16283	0.094363	-1.72556	0.0844265	0.366483
ENSG00000011143	MKS1	protein_coding	17	MKS transition zone complex subunit 1	692.252	0.0335391	0.0632665	0.530123	0.596027	0.843103
ENSG00000011198	ABHD5	protein_coding	3	abhydrolase domain containing 5, lysophosphatidic acid acyltransferase	664.463	-0.136436	0.142401	-0.958091	0.338017	0.690531
ENSG00000011201	ANOS1	protein_coding	X	anosmin 1	37.4714	0.16762	0.268866	0.62513	0.531886	0.814367
ENSG00000011243	AKAP8L	protein_coding	19	A-kinase anchoring protein 8 like	4610.52	0.0835578	0.121317	0.688759	0.490975	0.792472
ENSG00000011258	MBTD1	protein_coding	17	mbt domain containing 1	972.401	0.441177	0.102649	4.29782	1.72489e-05	0.000590613
ENSG00000011260	UTP18	protein_coding	17	UTP18 small subunit processome component	2089.4	-0.119143	0.187158	-0.63659	0.524392	0.810271
ENSG00000011275	RNF216	protein_coding	7	ring finger protein 216	2676.53	-0.0292066	0.0825987	-0.353598	0.72364	0.903868
ENSG00000011295	TTC19	protein_coding	17	tetratricopeptide repeat domain 19	2314.88	-0.0268374	0.156849	-0.171105	0.864141	0.957715
ENSG00000011304	PTBP1	protein_coding	19	polypyrimidine tract binding protein 1	13031.7	-0.218003	0.0784727	-2.77807	0.00546824	0.0630699
ENSG00000011332	DPF1	protein_coding	19	double PHD fingers 1	89.9603	-0.303793	0.131213	-2.31471	0.0206288	0.157108
ENSG00000011376	LARS2	protein_coding	3	leucyl-tRNA synthetase 2, mitochondrial	1882.96	-0.420926	0.164176	-2.56384	0.010352	0.0975472
ENSG00000011405	PIK3C2A	protein_coding	11	phosphatidylinositol-4-phosphate 3-kinase catalytic subunit type 2 alpha	4318.42	0.262269	0.151687	1.72901	0.0838073	0.365011
ENSG00000011422	PLAUR	protein_coding	19	plasminogen activator, urokinase receptor	2653.4	-1.62987	0.213363	-7.6442	2.10245e-14	3.14369e-12
ENSG00000011426	ANLN	protein_coding	7	anillin actin binding protein	7704.77	-0.026619	0.124763	-0.213359	0.831047	0.94836
ENSG00000011451	WIZ	protein_coding	19	WIZ zinc finger	4616.78	-0.0475771	0.075024	-0.634159	0.525977	0.811454
ENSG00000011454	RABGAP1	protein_coding	9	RAB GTPase activating protein 1	4294.15	0.150874	0.106594	1.41541	0.156948	0.496956
ENSG00000011465	DCN	protein_coding	12	decorin	46.5165	0.00412429	0.279567	0.0147582	0.988225	0.997671
ENSG00000011478	QPCTL	protein_coding	19	glutaminyl-peptide cyclotransferase like	1317.54	-0.194631	0.170908	-1.1388	0.254788	0.618832
ENSG00000011485	PPP5C	protein_coding	19	protein phosphatase 5 catalytic subunit	4777.86	-0.217974	0.155836	-1.39874	0.16189	0.503701
ENSG00000011523	CEP68	protein_coding	2	centrosomal protein 68	1671.83	0.098913	0.0622823	1.58814	0.112255	0.42251
ENSG00000011566	MAP4K3	protein_coding	2	mitogen-activated protein kinase kinase kinase kinase 3	3092.38	0.13664	0.117836	1.15957	0.246224	0.609591
ENSG00000011638	TMEM159	protein_coding	16	transmembrane protein 159	926.16	0.0747104	0.121297	0.615923	0.537945	0.816881
ENSG00000012048	BRCA1	protein_coding	17	BRCA1 DNA repair associated	1657.48	-0.038611	0.243145	-0.158804	0.873823	0.961335
ENSG00000012061	ERCC1	protein_coding	19	ERCC excision repair 1, endonuclease non-catalytic subunit	7594.46	-1.02629	0.109206	-9.39763	5.58034e-21	1.58879e-18
ENSG00000012124	CD22	protein_coding	19	CD22 molecule	132.815	-0.873548	0.200571	-4.35268	1.34485e-05	0.000476987
ENSG00000012171	SEMA3B	protein_coding	3	semaphorin 3B	6901.35	0.0386908	0.190743	0.203288	0.83891	0.94966
ENSG00000012174	MBTPS2	protein_coding	X	membrane bound transcription factor peptidase, site 2	1923.9	0.0854644	0.0925941	0.922996	0.356009	0.70456
ENSG00000012211	PRICKLE3	protein_coding	X	prickle planar cell polarity protein 3	658.3	-0.122563	0.133466	-0.918291	0.358467	0.706778
ENSG00000012232	EXTL3	protein_coding	8	exostosin like glycosyltransferase 3	6757	0.115441	0.0920026	1.25476	0.209567	0.568252
ENSG00000012660	ELOVL5	protein_coding	6	ELOVL fatty acid elongase 5	4383.71	0.0869273	0.0844796	1.02897	0.303493	0.663144
ENSG00000012817	KDM5D	protein_coding	Y	lysine demethylase 5D	3899.19	0.159773	0.0855018	1.86866	0.0616706	0.308338
ENSG00000012822	CALCOCO1	protein_coding	12	calcium binding and coiled-coil domain 1	9273.09	0.185483	0.183788	1.00923	0.312865	0.671339
ENSG00000012963	UBR7	protein_coding	14	ubiquitin protein ligase E3 component n-recognin 7	2533	0.025907	0.121651	0.21296	0.831358	0.948506
ENSG00000012983	MAP4K5	protein_coding	14	mitogen-activated protein kinase kinase kinase kinase 5	4573.51	0.298002	0.19157	1.55559	0.119805	0.437307
ENSG00000013016	EHD3	protein_coding	2	EH domain containing 3	1768.14	-0.189059	0.261181	-0.723936	0.469105	0.781115
ENSG00000013275	PSMC4	protein_coding	19	proteasome 26S subunit, ATPase 4	4431.15	-0.310174	0.111716	-2.77645	0.00549561	0.0632802
ENSG00000013288	MAN2B2	protein_coding	4	mannosidase alpha class 2B member 2	3930.49	0.155416	0.209694	0.741163	0.458595	0.774899
ENSG00000013293	SLC7A14	protein_coding	3	solute carrier family 7 member 14	33.8758	0.303288	0.264368	1.15889	0.246501	0.609623
ENSG00000013297	CLDN11	protein_coding	3	claudin 11	215.667	0.125681	0.276439	0.454717	0.649313	0.869101
ENSG00000013306	SLC25A39	protein_coding	17	solute carrier family 25 member 39	7728.06	-0.145866	0.133743	-1.09065	0.275427	0.636336
ENSG00000013364	MVP	protein_coding	16	major vault protein	14836.2	-0.426979	0.100467	-4.24992	2.1385e-05	0.000707747
ENSG00000013374	NUB1	protein_coding	7	negative regulator of ubiquitin like proteins 1	3480.93	0.101273	0.0840006	1.20562	0.227966	0.590999
ENSG00000013375	PGM3	protein_coding	6	phosphoglucomutase 3	2849.94	0.107999	0.213834	0.505063	0.613514	0.851945
ENSG00000013392	RWDD2A	protein_coding	6	RWD domain containing 2A	593.531	0.185091	0.174366	1.06152	0.288455	0.650103
ENSG00000013441	CLK1	protein_coding	2	CDC like kinase 1	6580.49	0.468092	0.148918	3.14328	0.00167063	0.0263448
ENSG00000013503	POLR3B	protein_coding	12	RNA polymerase III subunit B	654.171	-0.0424207	0.134226	-0.316038	0.751974	0.917698
ENSG00000013523	ANGEL1	protein_coding	14	angel homolog 1	1961.59	0.0678265	0.0818094	0.829081	0.407059	0.742197
ENSG00000013561	RNF14	protein_coding	5	ring finger protein 14	4053.87	0.121739	0.099553	1.22285	0.221386	0.583837
ENSG00000013563	DNASE1L1	protein_coding	X	deoxyribonuclease 1 like 1	3715.98	-0.0186318	0.198325	-0.0939477	0.925151	0.978043
ENSG00000013573	DDX11	protein_coding	12	DEAD/H-box helicase 11	2335.85	-0.00525095	0.205675	-0.0255316	0.979631	0.995144
ENSG00000013583	HEBP1	protein_coding	12	heme binding protein 1	2637.26	0.117776	0.156198	0.754014	0.450841	0.770388
ENSG00000013588	GPRC5A	protein_coding	12	G protein-coupled receptor class C group 5 member A	797.085	-0.569968	0.100599	-5.66538	1.46702e-08	9.86747e-07
ENSG00000013619	MAMLD1	protein_coding	X	mastermind like domain containing 1	1126.78	0.0338138	0.086734	0.389856	0.696643	0.892577
ENSG00000013725	CD6	protein_coding	11	CD6 molecule	31.4205	0.148231	0.263986	0.562999	0.573435	0.83298
ENSG00000013810	TACC3	protein_coding	4	transforming acidic coiled-coil containing protein 3	4112.72	-0.195762	0.155555	-1.25848	0.208219	0.567245
ENSG00000014123	UFL1	protein_coding	6	UFM1 specific ligase 1	1597.39	0.181508	0.0931246	1.94908	0.0512854	0.277582
ENSG00000014138	POLA2	protein_coding	11	DNA polymerase alpha 2, accessory subunit	382.731	-0.215642	0.161983	-1.33119	0.183127	0.536069
ENSG00000014164	ZC3H3	protein_coding	8	zinc finger CCCH-type containing 3	1034.12	-0.0364149	0.0887297	-0.410403	0.68151	0.884356
ENSG00000014216	CAPN1	protein_coding	11	calpain 1	12904	-0.126827	0.0761888	-1.66465	0.095983	0.390461
ENSG00000014257	ACP3	protein_coding	3	acid phosphatase 3	4.90042	-0.358574	0.256102	-1.4243	0.154361	0.493296
ENSG00000014641	MDH1	protein_coding	2	malate dehydrogenase 1	8421.39	-0.114998	0.174747	-0.658087	0.510482	0.802744
ENSG00000014824	SLC30A9	protein_coding	4	solute carrier family 30 member 9	3647.24	0.0797159	0.0908879	0.877077	0.380445	0.722577
ENSG00000014914	MTMR11	protein_coding	1	myotubularin related protein 11	1014.76	0.0203253	0.13556	0.149936	0.880815	0.963392
ENSG00000014919	COX15	protein_coding	10	cytochrome c oxidase assembly homolog COX15	1421.1	0.0648689	0.112715	0.575507	0.564949	0.829074
ENSG00000015133	CCDC88C	protein_coding	14	coiled-coil domain containing 88C	19.0194	-1.22138	0.277113	-4.3898	1.13454e-05	0.00040938
ENSG00000015153	YAF2	protein_coding	12	YY1 associated factor 2	468.534	0.168214	0.101514	1.65704	0.0975115	0.39292
ENSG00000015171	ZMYND11	protein_coding	10	zinc finger MYND-type containing 11	4596.44	0.167606	0.0559884	2.99357	0.00275732	0.0383589
ENSG00000015285	WAS	protein_coding	X	WASP actin nucleation promoting factor	13.2986	-0.040856	0.28136	-0.145472	0.884338	0.964202
ENSG00000015413	DPEP1	protein_coding	16	dipeptidase 1	21.4827	-0.24743	0.281149	-0.881251	0.378182	0.721312
ENSG00000015475	BID	protein_coding	22	BH3 interacting domain death agonist	848.335	-0.224908	0.172614	-1.30293	0.192598	0.54835
ENSG00000015479	MATR3	protein_coding	5	matrin 3	524.939	0.137641	0.105089	1.30975	0.190279	0.545796
ENSG00000015532	XYLT2	protein_coding	17	xylosyltransferase 2	1759.43	-0.150959	0.0986673	-1.52997	0.126024	0.447486
ENSG00000015568	RGPD5	protein_coding	2	RANBP2 like and GRIP domain containing 5	19.7981	0.0926703	0.215243	0.430354	0.666938	0.877875
ENSG00000015676	NUDCD3	protein_coding	7	NudC domain containing 3	4620.79	-0.0964013	0.102765	-0.938074	0.348206	0.697957
ENSG00000016391	CHDH	protein_coding	3	choline dehydrogenase	34.248	-0.00520394	0.254346	-0.0204546	0.983681	0.99615
ENSG00000016490	CLCA1	protein_coding	1	chloride channel accessory 1	5.88318	0.142797	0.188667	0.782371	0.433996	0.760434
ENSG00000016864	GLT8D1	protein_coding	3	glycosyltransferase 8 domain containing 1	3240.21	0.129849	0.150239	0.864281	0.387434	0.727278
ENSG00000017260	ATP2C1	protein_coding	3	ATPase secretory pathway Ca2+ transporting 1	6919.93	0.302658	0.0674041	4.4902	7.11563e-06	0.000269875
ENSG00000017483	SLC38A5	protein_coding	X	solute carrier family 38 member 5	11.8655	-0.0743203	0.260534	-0.284914	0.77571	0.926572
ENSG00000017797	RALBP1	protein_coding	18	ralA binding protein 1	6167.63	0.0087637	0.0666217	0.131544	0.895345	0.967866
ENSG00000018189	RUFY3	protein_coding	4	RUN and FYVE domain containing 3	2950.74	0.309032	0.0910856	3.39275	0.000691947	0.0131098
ENSG00000018236	CNTN1	protein_coding	12	contactin 1	608.226	0.563609	0.205344	2.74484	0.0060541	0.0676861
ENSG00000018280	SLC11A1	protein_coding	2	solute carrier family 11 member 1	30.2631	-0.0551688	0.206865	-0.266716	0.789688	0.932151
ENSG00000018408	WWTR1	protein_coding	3	WW domain containing transcription regulator 1	11459.1	-0.829686	0.0919245	-9.02568	1.78588e-19	4.63972e-17
ENSG00000018510	AGPS	protein_coding	2	alkylglycerone phosphate synthase	3032.81	0.130639	0.133413	0.979202	0.32748	0.682546
ENSG00000018607	ZNF806	transcribed_unprocessed_pseudogene	2	zinc finger protein 806	3.37482	0.0317577	0.225247	0.141331	0.887609	0.965314
ENSG00000018610	CXorf56	protein_coding	X	chromosome X open reading frame 56	924.994	-0.0120443	0.0923461	-0.130426	0.896229	0.968252
ENSG00000018625	ATP1A2	protein_coding	1	ATPase Na+/K+ transporting subunit alpha 2	1.87299	0.102318	0.119744	1.02231	0.306633	0.664709
ENSG00000018699	TTC27	protein_coding	2	tetratricopeptide repeat domain 27	864.121	-0.0194782	0.0864853	-0.22522	0.821808	0.945011
ENSG00000018869	ZNF582	protein_coding	19	zinc finger protein 582	129.615	0.308416	0.140748	2.19099	0.0284522	0.193758
ENSG00000019144	PHLDB1	protein_coding	11	pleckstrin homology like domain family B member 1	9368.97	-0.0708828	0.261591	-0.270974	0.786411	0.930875
ENSG00000019186	CYP24A1	protein_coding	20	cytochrome P450 family 24 subfamily A member 1	24.7018	-0.108146	0.235301	-0.461267	0.644607	0.86688
ENSG00000019485	PRDM11	protein_coding	11	PR/SET domain 11	497.963	0.166589	0.178318	0.934234	0.350183	0.699747
ENSG00000019549	SNAI2	protein_coding	8	snail family transcriptional repressor 2	9503.66	0.26946	0.236755	1.1382	0.255036	0.618925
ENSG00000019582	CD74	protein_coding	5	CD74 molecule	919.988	-0.6754	0.247324	-3.13691	0.00170741	0.0267623
ENSG00000019995	ZRANB1	protein_coding	10	zinc finger RANBP2-type containing 1	2304.6	0.208848	0.0607243	3.43927	0.000583285	0.0114801
ENSG00000020129	NCDN	protein_coding	1	neurochondrin	3653.43	-0.452713	0.137702	-3.2876	0.00101045	0.0175155
ENSG00000020181	ADGRA2	protein_coding	8	adhesion G protein-coupled receptor A2	4173.03	0.27707	0.157545	1.75867	0.0786344	0.350946
ENSG00000020256	ZFP64	protein_coding	20	ZFP64 zinc finger protein	1019.48	-0.0427396	0.10053	-0.425141	0.670734	0.879488
ENSG00000020426	MNAT1	protein_coding	14	MNAT1 component of CDK activating kinase	696.276	-0.0661619	0.105814	-0.625264	0.531798	0.814367
ENSG00000020577	SAMD4A	protein_coding	14	sterile alpha motif domain containing 4A	7757.76	0.412023	0.0835438	4.9318	8.14733e-07	3.87492e-05
ENSG00000020633	RUNX3	protein_coding	1	RUNX family transcription factor 3	7384.67	-0.272985	0.166043	-1.64406	0.100163	0.3983
ENSG00000020922	MRE11	protein_coding	11	MRE11 homolog, double strand break repair nuclease	1408.67	0.193558	0.0779831	2.48204	0.0130633	0.115212
ENSG00000021300	PLEKHB1	protein_coding	11	pleckstrin homology domain containing B1	271.172	-0.292311	0.181101	-1.61411	0.106503	0.41127
ENSG00000021355	SERPINB1	protein_coding	6	serpin family B member 1	1794.92	0.124881	0.0579175	2.15618	0.0310697	0.205588
ENSG00000021574	SPAST	protein_coding	2	spastin	769.674	0.0734878	0.0979721	0.750088	0.453201	0.771571
ENSG00000021645	NRXN3	protein_coding	14	neurexin 3	670.74	-0.0291237	0.222212	-0.131133	0.89567	0.968051
ENSG00000021762	OSBPL5	protein_coding	11	oxysterol binding protein like 5	2750.43	-0.126793	0.101832	-1.24511	0.21309	0.573688
ENSG00000021776	AQR	protein_coding	15	aquarius intron-binding spliceosomal factor	2859.81	0.147744	0.0838976	1.76101	0.0782373	0.350147
ENSG00000021826	CPS1	protein_coding	2	carbamoyl-phosphate synthase 1	911.907	0.0845233	0.142529	0.593032	0.55316	0.825035
ENSG00000022267	FHL1	protein_coding	X	four and a half LIM domains 1	1955.97	0.272708	0.0607667	4.48777	7.19741e-06	0.000271983
ENSG00000022277	RTF2	protein_coding	20	replication termination factor 2	5704.05	-0.0251378	0.0573438	-0.43837	0.661118	0.87461
ENSG00000022556	NLRP2	protein_coding	19	NLR family pyrin domain containing 2	472.911	-0.232507	0.208478	-1.11529	0.264727	0.627778
ENSG00000022567	SLC45A4	protein_coding	8	solute carrier family 45 member 4	370.895	0.00488568	0.0841783	0.0580393	0.953717	0.987794
ENSG00000022840	RNF10	protein_coding	12	ring finger protein 10	6379.65	-0.0802888	0.0503979	-1.5931	0.111139	0.420382
ENSG00000022976	ZNF839	protein_coding	14	zinc finger protein 839	634.784	-0.0879151	0.0968443	-0.907793	0.363987	0.710626
ENSG00000023041	ZDHHC6	protein_coding	10	zinc finger DHHC-type palmitoyltransferase 6	2625.76	0.0165784	0.0506042	0.327609	0.743207	0.913634
ENSG00000023171	GRAMD1B	protein_coding	11	GRAM domain containing 1B	189.493	0.0306542	0.200803	0.152669	0.878659	0.963179
ENSG00000023191	RNH1	protein_coding	11	ribonuclease/angiogenin inhibitor 1	10786.7	-0.163802	0.125718	-1.30294	0.192597	0.54835
ENSG00000023228	NDUFS1	protein_coding	2	NADH:ubiquinone oxidoreductase core subunit S1	7375.98	-0.0918437	0.0891193	-1.03057	0.302743	0.662616
ENSG00000023287	RB1CC1	protein_coding	8	RB1 inducible coiled-coil 1	3582.07	0.263319	0.119543	2.20272	0.0276144	0.190046
ENSG00000023318	ERP44	protein_coding	9	endoplasmic reticulum protein 44	3116.05	0.227589	0.129712	1.75457	0.079333	0.353067
ENSG00000023330	ALAS1	protein_coding	3	5'-aminolevulinate synthase 1	3571.02	-0.301734	0.0912655	-3.3061	0.000946039	0.0166591
ENSG00000023445	BIRC3	protein_coding	11	baculoviral IAP repeat containing 3	75.6872	-0.112459	0.264932	-0.425126	0.670745	0.879488
ENSG00000023516	AKAP11	protein_coding	13	A-kinase anchoring protein 11	3800.73	0.0256352	0.148937	0.172121	0.863342	0.957611
ENSG00000023572	GLRX2	protein_coding	1	glutaredoxin 2	995.207	-0.0263376	0.127389	-0.206748	0.836206	0.949238
ENSG00000023608	SNAPC1	protein_coding	14	small nuclear RNA activating complex polypeptide 1	437.481	-0.0610464	0.157912	-0.386593	0.699058	0.893666
ENSG00000023697	DERA	protein_coding	12	deoxyribose-phosphate aldolase	2141.88	0.22492	0.227278	0.989639	0.322351	0.679073
ENSG00000023734	STRAP	protein_coding	12	serine/threonine kinase receptor associated protein	7400.56	0.0349964	0.041491	0.843468	0.398967	0.736331
ENSG00000023839	ABCC2	protein_coding	10	ATP binding cassette subfamily C member 2	2584.37	0.012985	0.238002	0.0545568	0.956492	0.989041
ENSG00000023892	DEF6	protein_coding	6	DEF6 guanine nucleotide exchange factor	43.8763	-0.411571	0.193015	-2.1306	0.0331222	0.213461
ENSG00000023902	PLEKHO1	protein_coding	1	pleckstrin homology domain containing O1	2951.13	0.00496439	0.113031	0.0439196	0.964968	0.991884
ENSG00000023909	GCLM	protein_coding	1	glutamate-cysteine ligase modifier subunit	1120.54	-0.235977	0.0751504	-3.14005	0.00168918	0.0265768
ENSG00000024048	UBR2	protein_coding	6	ubiquitin protein ligase E3 component n-recognin 2	3152.86	0.158811	0.0840823	1.88876	0.0589242	0.2998
ENSG00000024422	EHD2	protein_coding	19	EH domain containing 2	8623.25	-0.14474	0.223239	-0.648373	0.516744	0.805822
ENSG00000024526	DEPDC1	protein_coding	1	DEP domain containing 1	979.799	0.178992	0.165152	1.08379	0.278459	0.639263
ENSG00000024862	CCDC28A	protein_coding	6	coiled-coil domain containing 28A	861.384	0.236516	0.0590891	4.00267	6.2632e-05	0.00178077
ENSG00000025039	RRAGD	protein_coding	6	Ras related GTP binding D	2235.82	0.225966	0.281135	0.804762	0.420957	0.751461
ENSG00000025156	HSF2	protein_coding	6	heat shock transcription factor 2	907.472	0.296171	0.0984241	3.00908	0.00262039	0.037068
ENSG00000025293	PHF20	protein_coding	20	PHD finger protein 20	3119.41	0.15176	0.0952178	1.59382	0.110977	0.419981
ENSG00000025423	HSD17B6	protein_coding	12	hydroxysteroid 17-beta dehydrogenase 6	95.3538	0.196491	0.156045	1.25924	0.207943	0.566879
ENSG00000025434	NR1H3	protein_coding	11	nuclear receptor subfamily 1 group H member 3	896.99	-0.25249	0.0834605	-3.02525	0.00248428	0.0357046
ENSG00000025708	TYMP	protein_coding	22	thymidine phosphorylase	1363.86	-0.230705	0.201768	-1.14343	0.252859	0.616327
ENSG00000025770	NCAPH2	protein_coding	22	non-SMC condensin II complex subunit H2	2378.66	-0.193249	0.123409	-1.56591	0.117369	0.432978
ENSG00000025772	TOMM34	protein_coding	20	translocase of outer mitochondrial membrane 34	2316.16	-0.534183	0.221823	-2.4084	0.0160226	0.132993
ENSG00000025796	SEC63	protein_coding	6	SEC63 homolog, protein translocation regulator	4651.02	0.0883772	0.0747896	1.18168	0.237334	0.601038
ENSG00000025800	KPNA6	protein_coding	1	karyopherin subunit alpha 6	4113.72	-0.0227649	0.0546445	-0.4166	0.676971	0.882585
ENSG00000026025	VIM	protein_coding	10	vimentin	353913	0.124988	0.245994	0.508102	0.611382	0.850988
ENSG00000026036	RTEL1-TNFRSF6B	protein_coding	20	RTEL1-TNFRSF6B readthrough (NMD candidate)	427.955	-0.188006	0.132635	-1.41744	0.156356	0.49604
ENSG00000026103	FAS	protein_coding	10	Fas cell surface death receptor	585.24	0.0902467	0.137015	0.658663	0.510112	0.802611
ENSG00000026297	RNASET2	protein_coding	6	ribonuclease T2	374.223	-0.306581	0.194441	-1.57663	0.11488	0.427207
ENSG00000026508	CD44	protein_coding	11	CD44 molecule (Indian blood group)	56772.3	0.155935	0.173883	0.896776	0.369838	0.716109
ENSG00000026559	KCNG1	protein_coding	20	potassium voltage-gated channel modifier subfamily G member 1	123.582	-0.0156917	0.183244	-0.0856341	0.931757	0.980539
ENSG00000026652	AGPAT4	protein_coding	6	1-acylglycerol-3-phosphate O-acyltransferase 4	889.793	0.251113	0.250439	1.0028	0.315959	0.674036
ENSG00000026751	SLAMF7	protein_coding	1	SLAM family member 7	106.113	-0.477405	0.251371	-1.89972	0.0574705	0.296173
ENSG00000026950	BTN3A1	protein_coding	6	butyrophilin subfamily 3 member A1	1552.81	0.00677987	0.241215	0.0281053	0.977578	0.994663
ENSG00000027001	MIPEP	protein_coding	13	mitochondrial intermediate peptidase	1108.6	-0.0272356	0.241266	-0.112888	0.910119	0.97407
ENSG00000027075	PRKCH	protein_coding	14	protein kinase C eta	654.484	0.208194	0.277221	0.752503	0.451749	0.770716
ENSG00000027697	IFNGR1	protein_coding	6	interferon gamma receptor 1	1892.07	0.275627	0.0825585	3.33854	0.000842198	0.0152742
ENSG00000027847	B4GALT7	protein_coding	5	beta-1,4-galactosyltransferase 7	1424.99	-0.270752	0.0901964	-3.00179	0.00268395	0.0375897
ENSG00000027869	SH2D2A	protein_coding	1	SH2 domain containing 2A	8.7713	-1.17778	0.281327	-4.12798	3.65959e-05	0.00112099
ENSG00000028116	VRK2	protein_coding	2	VRK serine/threonine kinase 2	973.219	0.00777061	0.0747646	0.103934	0.917222	0.975318
ENSG00000028137	TNFRSF1B	protein_coding	1	TNF receptor superfamily member 1B	214.648	-1.26899	0.269865	-4.73151	2.22858e-06	9.58983e-05
ENSG00000028203	VEZT	protein_coding	12	vezatin, adherens junctions transmembrane protein	2298.33	0.105589	0.154969	0.681354	0.495648	0.795321
ENSG00000028277	POU2F2	protein_coding	19	POU class 2 homeobox 2	223.996	-0.919959	0.278975	-3.41414	0.000639845	0.0122907
ENSG00000028310	BRD9	protein_coding	5	bromodomain containing 9	2757.05	-0.0328633	0.0835095	-0.393529	0.693929	0.89098
ENSG00000028528	SNX1	protein_coding	15	sorting nexin 1	9032.62	-0.0323878	0.0615715	-0.52602	0.598874	0.844821
ENSG00000028839	TBPL1	protein_coding	6	TATA-box binding protein like 1	629.192	0.113345	0.0818334	1.38506	0.166035	0.510635
ENSG00000029153	ARNTL2	protein_coding	12	aryl hydrocarbon receptor nuclear translocator like 2	87.9008	-0.385861	0.277999	-1.39689	0.162448	0.504605
ENSG00000029363	BCLAF1	protein_coding	6	BCL2 associated transcription factor 1	6416.56	0.176341	0.0809849	2.17745	0.0294468	0.198417
ENSG00000029364	SLC39A9	protein_coding	14	solute carrier family 39 member 9	3199.58	0.139261	0.0779727	1.78602	0.0740968	0.339375
ENSG00000029534	ANK1	protein_coding	8	ankyrin 1	35.2437	0.119013	0.23747	0.503737	0.614446	0.852741
ENSG00000029639	TFB1M	protein_coding	6	transcription factor B1, mitochondrial	603.991	-0.267483	0.175584	-1.52335	0.127672	0.450591
ENSG00000029725	RABEP1	protein_coding	17	rabaptin, RAB GTPase binding effector protein 1	6482.6	0.193156	0.0773808	2.49617	0.0125542	0.111848
ENSG00000029993	HMGB3	protein_coding	X	high mobility group box 3	2826.78	0.0736241	0.219154	0.335944	0.736913	0.910903
ENSG00000030066	NUP160	protein_coding	11	nucleoporin 160	3143.38	0.127285	0.0679324	1.87371	0.0609711	0.30624
ENSG00000030110	BAK1	protein_coding	6	BCL2 antagonist/killer 1	1616.86	-0.223723	0.0772441	-2.89629	0.00377609	0.048556
ENSG00000030419	IKZF2	protein_coding	2	IKAROS family zinc finger 2	303.736	0.170167	0.274572	0.619901	0.535323	0.815999
ENSG00000030582	GRN	protein_coding	17	granulin precursor	37710.6	0.126784	0.168469	0.752565	0.451711	0.770716
ENSG00000031003	FAM13B	protein_coding	5	family with sequence similarity 13 member B	5182.67	0.416035	0.112952	3.68329	0.000230247	0.00534092
ENSG00000031081	ARHGAP31	protein_coding	3	Rho GTPase activating protein 31	4334.83	0.00999355	0.13668	0.0731157	0.941714	0.983524
ENSG00000031691	CENPQ	protein_coding	6	centromere protein Q	335.077	0.0906631	0.182034	0.498032	0.618462	0.855068
ENSG00000031698	SARS1	protein_coding	1	seryl-tRNA synthetase 1	8910.96	-0.139938	0.0733578	-1.9076	0.0564424	0.293209
ENSG00000031823	RANBP3	protein_coding	19	RAN binding protein 3	3954.4	-0.0825136	0.0696911	-1.18399	0.236417	0.599988
ENSG00000032219	ARID4A	protein_coding	14	AT-rich interaction domain 4A	2069.44	0.377449	0.133214	2.8334	0.00460558	0.0559453
ENSG00000032389	EIPR1	protein_coding	2	EARP complex and GARP complex interacting protein 1	1318.63	-0.320882	0.113694	-2.8223	0.00476811	0.0572504
ENSG00000032444	PNPLA6	protein_coding	19	patatin like phospholipase domain containing 6	6484.79	-0.178523	0.0774609	-2.30468	0.0211843	0.159585
ENSG00000032742	IFT88	protein_coding	13	intraflagellar transport 88	1068.78	0.246057	0.18331	1.34228	0.179505	0.531825
ENSG00000033011	ALG1	protein_coding	16	ALG1 chitobiosyldiphosphodolichol beta-mannosyltransferase	2435.46	-0.12496	0.166619	-0.749972	0.453271	0.771627
ENSG00000033030	ZCCHC8	protein_coding	12	zinc finger CCHC-type containing 8	1216.35	0.131707	0.0708296	1.85949	0.0629577	0.311106
ENSG00000033050	ABCF2	protein_coding	7	ATP binding cassette subfamily F member 2	1282.67	-0.241335	0.122644	-1.96774	0.0490983	0.270177
ENSG00000033100	CHPF2	protein_coding	7	chondroitin polymerizing factor 2	5439.27	-0.225775	0.176048	-1.28247	0.199679	0.556391
ENSG00000033122	LRRC7	protein_coding	1	leucine rich repeat containing 7	2277.6	0.101542	0.177038	0.587613	0.556792	0.826952
ENSG00000033170	FUT8	protein_coding	14	fucosyltransferase 8	1803.04	-0.0947315	0.166634	-0.568504	0.569693	0.83097
ENSG00000033178	UBA6	protein_coding	4	ubiquitin like modifier activating enzyme 6	1957.39	0.0946416	0.112964	0.837802	0.402142	0.738872
ENSG00000033327	GAB2	protein_coding	11	GRB2 associated binding protein 2	4579.45	0.0141675	0.145691	0.0972426	0.922534	0.977083
ENSG00000033627	ATP6V0A1	protein_coding	17	ATPase H+ transporting V0 subunit a1	7197.53	0.087228	0.228626	0.38153	0.70281	0.89523
ENSG00000033800	PIAS1	protein_coding	15	protein inhibitor of activated STAT 1	2144.35	0.296394	0.120396	2.46182	0.0138233	0.120125
ENSG00000033867	SLC4A7	protein_coding	3	solute carrier family 4 member 7	1902.63	-0.175011	0.202479	-0.864344	0.387399	0.727278
ENSG00000034053	APBA2	protein_coding	15	amyloid beta precursor protein binding family A member 2	2067.25	-0.193704	0.10323	-1.87643	0.0605962	0.305241
ENSG00000034152	MAP2K3	protein_coding	17	mitogen-activated protein kinase kinase 3	3505.81	-0.438397	0.152547	-2.87383	0.00405531	0.0507744
ENSG00000034239	EFCAB1	protein_coding	8	EF-hand calcium binding domain 1	28.7908	0.367789	0.280152	1.31343	0.18904	0.544213
ENSG00000034510	TMSB10	protein_coding	2	thymosin beta 10	59130.2	-0.106109	0.187111	-0.567091	0.570653	0.831759
ENSG00000034533	ASTE1	protein_coding	3	asteroid homolog 1	327.141	0.192963	0.131741	1.46468	0.143008	0.475507
ENSG00000034677	RNF19A	protein_coding	8	ring finger protein 19A, RBR E3 ubiquitin protein ligase	2552.26	-0.0467162	0.154185	-0.302989	0.761898	0.922122
ENSG00000034693	PEX3	protein_coding	6	peroxisomal biogenesis factor 3	620.688	0.161214	0.183338	0.879308	0.379234	0.72193
ENSG00000034713	GABARAPL2	protein_coding	16	GABA type A receptor associated protein like 2	4571.73	0.084047	0.0797995	1.05323	0.292237	0.653103
ENSG00000035115	SH3YL1	protein_coding	2	SH3 and SYLF domain containing 1	1249.64	0.221177	0.146773	1.50694	0.131825	0.456788
ENSG00000035141	FAM136A	protein_coding	2	family with sequence similarity 136 member A	2027.93	-0.0625673	0.172436	-0.362842	0.716723	0.90177
ENSG00000035403	VCL	protein_coding	10	vinculin	16350.8	0.0745532	0.235467	0.316618	0.751534	0.917467
ENSG00000035499	DEPDC1B	protein_coding	5	DEP domain containing 1B	785.978	0.0388939	0.215118	0.180802	0.856523	0.955814
ENSG00000035664	DAPK2	protein_coding	15	death associated protein kinase 2	79.2804	0.189152	0.264482	0.718147	0.472667	0.783218
ENSG00000035681	NSMAF	protein_coding	8	neutral sphingomyelinase activation associated factor	2431.36	0.0266591	0.154036	0.173069	0.862597	0.957315
ENSG00000035687	ADSS2	protein_coding	1	adenylosuccinate synthase 2	3565.71	-0.0810546	0.0723221	-1.12074	0.262397	0.625932
ENSG00000035862	TIMP2	protein_coding	17	TIMP metallopeptidase inhibitor 2	88713.7	0.27087	0.0810506	3.34199	0.0008318	0.0151261
ENSG00000035928	RFC1	protein_coding	4	replication factor C subunit 1	4281.06	0.194662	0.13028	1.49418	0.135129	0.462766
ENSG00000036054	TBC1D23	protein_coding	3	TBC1 domain family member 23	2518	0.255578	0.261374	0.977994	0.328077	0.682934
ENSG00000036257	CUL3	protein_coding	2	cullin 3	3569.12	0.0991954	0.0862387	1.15024	0.250044	0.613143
ENSG00000036448	MYOM2	protein_coding	8	myomesin 2	59.3706	-0.294968	0.163855	-1.79996	0.0718669	0.334307
ENSG00000036530	CYP46A1	protein_coding	14	cytochrome P450 family 46 subfamily A member 1	7.38518	0.521337	0.275658	1.88334	0.0596542	0.302366
ENSG00000036549	ZZZ3	protein_coding	1	zinc finger ZZ-type containing 3	2743.43	0.0663554	0.0970598	0.683654	0.494194	0.794258
ENSG00000036672	USP2	protein_coding	11	ubiquitin specific peptidase 2	22.9471	0.065332	0.259734	0.251458	0.80146	0.937545
ENSG00000037042	TUBG2	protein_coding	17	tubulin gamma 2	2263.24	0.0792897	0.170724	0.464434	0.642337	0.86553
ENSG00000037241	RPL26L1	protein_coding	5	ribosomal protein L26 like 1	1289.34	-0.0696883	0.0851499	-0.818421	0.413117	0.74606
ENSG00000037280	FLT4	protein_coding	5	fms related receptor tyrosine kinase 4	2.56286	-0.170851	0.185312	-0.968051	0.333019	0.686173
ENSG00000037474	NSUN2	protein_coding	5	NOP2/Sun RNA methyltransferase 2	4537.64	-0.0951141	0.0818637	-1.16186	0.245293	0.608908
ENSG00000037637	FBXO42	protein_coding	1	F-box protein 42	1721.69	0.0691514	0.0438252	1.57789	0.114591	0.426741
ENSG00000037749	MFAP3	protein_coding	5	microfibril associated protein 3	1454.11	0.102512	0.109077	0.939813	0.347313	0.69703
ENSG00000037757	MRI1	protein_coding	19	methylthioribose-1-phosphate isomerase 1	2075.23	-0.0875072	0.0847901	-1.03204	0.302051	0.662149
ENSG00000037897	METTL1	protein_coding	12	methyltransferase like 1	590.716	-0.434812	0.221628	-1.96192	0.0497717	0.272082
ENSG00000037965	HOXC8	protein_coding	12	homeobox C8	476.865	-0.101748	0.167594	-0.607122	0.54377	0.820744
ENSG00000038002	AGA	protein_coding	4	aspartylglucosaminidase	606.076	0.00372249	0.12334	0.03018	0.975923	0.994475
ENSG00000038210	PI4K2B	protein_coding	4	phosphatidylinositol 4-kinase type 2 beta	1008.3	-0.0971205	0.117301	-0.82796	0.407693	0.742425
ENSG00000038219	BOD1L1	protein_coding	4	biorientation of chromosomes in cell division 1 like 1	6653.54	0.0388463	0.0860731	0.451317	0.651761	0.869721
ENSG00000038274	MAT2B	protein_coding	5	methionine adenosyltransferase 2B	3122.97	0.0769171	0.157135	0.489493	0.624493	0.858033
ENSG00000038358	EDC4	protein_coding	16	enhancer of mRNA decapping 4	3244.08	-0.130299	0.0652987	-1.99544	0.0459952	0.259674
ENSG00000038382	TRIO	protein_coding	5	trio Rho guanine nucleotide exchange factor	15069.5	0.129833	0.125595	1.03374	0.301257	0.661609
ENSG00000038427	VCAN	protein_coding	5	versican	282.249	-0.335843	0.261207	-1.30544	0.191743	0.547417
ENSG00000038532	CLEC16A	protein_coding	16	C-type lectin domain containing 16A	2414.34	-0.0944498	0.0560156	-1.68613	0.0917701	0.381718
ENSG00000039068	CDH1	protein_coding	16	cadherin 1	4045.65	0.274587	0.238693	1.18015	0.237941	0.601584
ENSG00000039123	MTREX	protein_coding	5	Mtr4 exosome RNA helicase	2536.32	0.0751622	0.100849	0.745291	0.456096	0.772575
ENSG00000039139	DNAH5	protein_coding	5	dynein axonemal heavy chain 5	5.59531	0.303953	0.255514	1.20239	0.229211	0.592087
ENSG00000039319	ZFYVE16	protein_coding	5	zinc finger FYVE-type containing 16	5809.1	0.343414	0.192283	1.786	0.0740994	0.339375
ENSG00000039523	RIPOR1	protein_coding	16	RHO family interacting cell polarization regulator 1	6463.42	-0.00250737	0.0995163	-0.0251963	0.979898	0.995316
ENSG00000039560	RAI14	protein_coding	5	retinoic acid induced 14	11469.1	0.317993	0.241164	1.3187	0.187268	0.542184
ENSG00000039600	SOX30	protein_coding	5	SRY-box transcription factor 30	18.8554	0.132829	0.274431	0.484202	0.628243	0.860261
ENSG00000039650	PNKP	protein_coding	19	polynucleotide kinase 3'-phosphatase	2413.82	-0.179232	0.116164	-1.54291	0.122852	0.442763
ENSG00000040199	PHLPP2	protein_coding	16	PH domain and leucine rich repeat protein phosphatase 2	845.349	-0.0356281	0.0617218	-0.577238	0.563779	0.828741
ENSG00000040275	SPDL1	protein_coding	5	spindle apparatus coiled-coil protein 1	1282.77	-0.0231062	0.125995	-0.183391	0.854491	0.954822
ENSG00000040341	STAU2	protein_coding	8	staufen double-stranded RNA binding protein 2	1750.91	0.276285	0.142553	1.93813	0.0526079	0.281877
ENSG00000040487	SLC66A1	protein_coding	1	solute carrier family 66 member 1	1735.43	-0.209089	0.100083	-2.08915	0.0366944	0.227399
ENSG00000040531	CTNS	protein_coding	17	cystinosin, lysosomal cystine transporter	2961.98	0.36339	0.0674016	5.39138	6.99185e-08	4.11667e-06
ENSG00000040608	RTN4R	protein_coding	22	reticulon 4 receptor	118.694	-0.187205	0.281022	-0.666372	0.505173	0.800513
ENSG00000040633	PHF23	protein_coding	17	PHD finger protein 23	5170.24	-0.104483	0.155517	-0.671845	0.501682	0.798479
ENSG00000040933	INPP4A	protein_coding	2	inositol polyphosphate-4-phosphatase type I A	1690.1	-0.0182414	0.0743455	-0.245361	0.806177	0.939196
ENSG00000041353	RAB27B	protein_coding	18	RAB27B, member RAS oncogene family	25.5899	-1.76669	0.262307	-6.59571	4.23236e-11	4.07247e-09
ENSG00000041357	PSMA4	protein_coding	15	proteasome 20S subunit alpha 4	4566.89	0.0417049	0.0965588	0.43191	0.665807	0.877397
ENSG00000041515	MYO16	protein_coding	13	myosin XVI	331.451	0.193893	0.252526	0.767818	0.442595	0.765936
ENSG00000041802	LSG1	protein_coding	3	large 60S subunit nuclear export GTPase 1	2713.07	-0.23217	0.172774	-1.34377	0.179022	0.531239
ENSG00000041880	PARP3	protein_coding	3	poly(ADP-ribose) polymerase family member 3	1121.38	-0.137949	0.0851434	-1.62019	0.10519	0.408834
ENSG00000041982	TNC	protein_coding	9	tenascin C	8107.93	-1.18941	0.280283	-4.46205	8.11806e-06	0.000300224
ENSG00000041988	THAP3	protein_coding	1	THAP domain containing 3	1125.3	-0.0593418	0.0759097	-0.781742	0.434366	0.760434
ENSG00000042062	RIPOR3	protein_coding	20	RIPOR family member 3	3.13772	-0.531169	0.254572	-2.11235	0.0346568	0.219603
ENSG00000042088	TDP1	protein_coding	14	tyrosyl-DNA phosphodiesterase 1	1071.64	-0.12201	0.109378	-1.11548	0.264643	0.627678
ENSG00000042286	AIFM2	protein_coding	10	apoptosis inducing factor mitochondria associated 2	2717.84	-0.255825	0.0767221	-3.33442	0.00085477	0.0154215
ENSG00000042317	SPATA7	protein_coding	14	spermatogenesis associated 7	352.26	0.372237	0.123501	3.01384	0.00257966	0.036723
ENSG00000042429	MED17	protein_coding	11	mediator complex subunit 17	502.18	0.0325483	0.0851152	0.382401	0.702164	0.89483
ENSG00000042445	RETSAT	protein_coding	2	retinol saturase	11263.2	0.123656	0.257243	0.48071	0.630723	0.861523
ENSG00000042493	CAPG	protein_coding	2	capping actin protein, gelsolin like	2055.72	-0.291768	0.280609	-1.04098	0.297883	0.658807
ENSG00000042753	AP2S1	protein_coding	19	adaptor related protein complex 2 subunit sigma 1	5933.76	-0.384162	0.0875268	-4.38906	1.13842e-05	0.000410067
ENSG00000042781	USH2A	protein_coding	1	usherin	638.619	0.184779	0.281368	0.657137	0.511093	0.802974
ENSG00000042832	TG	protein_coding	8	thyroglobulin	14.4437	-0.282931	0.280047	-1.01148	0.311786	0.67027
ENSG00000042980	ADAM28	protein_coding	8	ADAM metallopeptidase domain 28	13.2336	-0.179402	0.274206	-0.654202	0.512981	0.804038
ENSG00000043093	DCUN1D1	protein_coding	3	defective in cullin neddylation 1 domain containing 1	1257.57	0.199795	0.101518	1.96807	0.04906	0.270109
ENSG00000043143	JADE2	protein_coding	5	jade family PHD finger 2	5202.05	-0.169461	0.16312	-1.03887	0.298865	0.659826
ENSG00000043462	LCP2	protein_coding	5	lymphocyte cytosolic protein 2	25.6785	-0.737299	0.249224	-2.94776	0.00320083	0.0429664
ENSG00000043514	TRIT1	protein_coding	1	tRNA isopentenyltransferase 1	785.009	0.0776274	0.1651	0.470176	0.638229	0.864301
ENSG00000044090	CUL7	protein_coding	6	cullin 7	3162.63	-0.139269	0.0637336	-2.18518	0.0288757	0.195617
ENSG00000044115	CTNNA1	protein_coding	5	catenin alpha 1	42035.2	0.0105644	0.138974	0.0760161	0.939406	0.98298
ENSG00000044446	PHKA2	protein_coding	X	phosphorylase kinase regulatory subunit alpha 2	2143.34	0.100756	0.108702	0.926907	0.353975	0.702907
ENSG00000044459	CNTLN	protein_coding	9	centlein	612.746	0.23321	0.11805	1.97549	0.0482127	0.267388
ENSG00000044524	EPHA3	protein_coding	3	EPH receptor A3	25.2082	-0.0935358	0.254956	-0.366881	0.713707	0.899885
ENSG00000044574	HSPA5	protein_coding	9	heat shock protein family A (Hsp70) member 5	29835.8	-0.392669	0.0574682	-6.8328	8.32718e-12	8.74102e-10
ENSG00000046604	DSG2	protein_coding	18	desmoglein 2	1717.82	-0.13228	0.123595	-1.07027	0.2845	0.646163
ENSG00000046647	GEMIN8	protein_coding	X	gem nuclear organelle associated protein 8	880.547	0.234913	0.0680335	3.45289	0.000554607	0.0109781
ENSG00000046651	OFD1	protein_coding	X	OFD1 centriole and centriolar satellite protein	754.328	0.0143088	0.138716	0.103152	0.917842	0.975478
ENSG00000046653	GPM6B	protein_coding	X	glycoprotein M6B	15417.1	0.542355	0.0904098	5.99884	1.98726e-09	1.55276e-07
ENSG00000047056	WDR37	protein_coding	10	WD repeat domain 37	1953.06	-0.0263542	0.079583	-0.331154	0.740528	0.912485
ENSG00000047188	YTHDC2	protein_coding	5	YTH domain containing 2	2093.32	0.138321	0.0737213	1.87626	0.0606191	0.305241
ENSG00000047230	CTPS2	protein_coding	X	CTP synthase 2	1202.59	0.185672	0.052615	3.52885	0.000417363	0.00873562
ENSG00000047249	ATP6V1H	protein_coding	8	ATPase H+ transporting V1 subunit H	3893.25	0.0545985	0.188552	0.289565	0.772149	0.925748
ENSG00000047315	POLR2B	protein_coding	4	RNA polymerase II subunit B	8190.16	0.00388873	0.0528533	0.0735755	0.941348	0.983511
ENSG00000047346	FAM214A	protein_coding	15	family with sequence similarity 214 member A	1513.4	0.391313	0.161438	2.42393	0.0153537	0.12909
ENSG00000047365	ARAP2	protein_coding	4	ArfGAP with RhoGAP domain, ankyrin repeat and PH domain 2	229.387	0.256822	0.19018	1.35044	0.176875	0.527655
ENSG00000047410	TPR	protein_coding	1	translocated promoter region, nuclear basket protein	10786.1	0.0820536	0.0760551	1.07887	0.280646	0.641744
ENSG00000047578	KATNIP	protein_coding	16	katanin interacting protein	3829.52	0.260946	0.193527	1.34838	0.177537	0.529024
ENSG00000047579	DTNBP1	protein_coding	6	dystrobrevin binding protein 1	1170.12	0.0332933	0.196338	0.16957	0.865348	0.957824
ENSG00000047617	ANO2	protein_coding	12	anoctamin 2	18.9703	0.117558	0.196039	0.610568	0.541486	0.819732
ENSG00000047621	C12orf4	protein_coding	12	chromosome 12 open reading frame 4	1141.74	0.255192	0.123544	2.06559	0.0388676	0.235174
ENSG00000047634	SCML1	protein_coding	X	Scm polycomb group protein like 1	980.845	0.193332	0.115551	1.67314	0.0942996	0.387885
ENSG00000047644	WWC3	protein_coding	X	WWC family member 3	5306.23	-0.0153098	0.0769938	-0.198845	0.842384	0.95048
ENSG00000047648	ARHGAP6	protein_coding	X	Rho GTPase activating protein 6	35.9603	-0.204913	0.214652	-0.954223	0.339971	0.691455
ENSG00000047662	FAM184B	protein_coding	4	family with sequence similarity 184 member B	476.926	0.108506	0.278406	0.389941	0.69658	0.892577
ENSG00000047849	MAP4	protein_coding	3	microtubule associated protein 4	47850.6	0.234917	0.204163	1.15065	0.249877	0.613143
ENSG00000047932	GOPC	protein_coding	6	golgi associated PDZ and coiled-coil motif containing	2114.82	0.277865	0.105952	2.62254	0.00872762	0.0877576
ENSG00000047936	ROS1	protein_coding	6	ROS proto-oncogene 1, receptor tyrosine kinase	7.08627	0.0728414	0.257039	0.284067	0.776359	0.926754
ENSG00000048028	USP28	protein_coding	11	ubiquitin specific peptidase 28	1647.75	0.0518864	0.153041	0.339034	0.734584	0.90957
ENSG00000048052	HDAC9	protein_coding	7	histone deacetylase 9	3277.45	0.329703	0.277354	1.18984	0.234108	0.59823
ENSG00000048140	TSPAN17	protein_coding	5	tetraspanin 17	3882.11	-0.159327	0.102842	-1.54924	0.121325	0.439918
ENSG00000048162	NOP16	protein_coding	5	NOP16 nucleolar protein	1277.45	-0.3893	0.229419	-1.697	0.0896959	0.377529
ENSG00000048342	CC2D2A	protein_coding	4	coiled-coil and C2 domain containing 2A	2438.33	0.0671583	0.132058	0.508549	0.611068	0.850772
ENSG00000048392	RRM2B	protein_coding	8	ribonucleotide reductase regulatory TP53 inducible subunit M2B	2238.61	0.120259	0.121593	0.989029	0.322649	0.679326
ENSG00000048405	ZNF800	protein_coding	7	zinc finger protein 800	879.425	0.103244	0.102863	1.0037	0.315521	0.673474
ENSG00000048471	SNX29	protein_coding	16	sorting nexin 29	1836.75	0.0901564	0.0632447	1.42552	0.154007	0.492959
ENSG00000048540	LMO3	protein_coding	12	LIM domain only 3	19.7691	0.30869	0.245195	1.25848	0.208218	0.567245
ENSG00000048544	MRPS10	protein_coding	6	mitochondrial ribosomal protein S10	1946.63	0.143361	0.0956576	1.49868	0.133956	0.460489
ENSG00000048649	RSF1	protein_coding	11	remodeling and spacing factor 1	4676.09	0.150622	0.0964348	1.5619	0.11831	0.43521
ENSG00000048707	VPS13D	protein_coding	1	vacuolar protein sorting 13 homolog D	5263.72	0.110873	0.102485	1.08185	0.279319	0.640274
ENSG00000048740	CELF2	protein_coding	10	CUGBP Elav-like family member 2	14385.3	0.350674	0.118826	2.95115	0.00316589	0.0426164
ENSG00000048828	FAM120A	protein_coding	9	family with sequence similarity 120A	10880	-0.153694	0.0397841	-3.8632	0.000111912	0.00290747
ENSG00000048991	R3HDM1	protein_coding	2	R3H domain containing 1	1875.84	-0.192641	0.0651575	-2.95654	0.00311113	0.0421524
ENSG00000049089	COL9A2	protein_coding	1	collagen type IX alpha 2 chain	299.951	-0.0380943	0.272807	-0.139663	0.888926	0.966135
ENSG00000049130	KITLG	protein_coding	12	KIT ligand	392.699	0.340533	0.255618	1.33251	0.182694	0.535872
ENSG00000049167	ERCC8	protein_coding	5	ERCC excision repair 8, CSA ubiquitin ligase complex subunit	520.739	0.176556	0.0917536	1.92422	0.0543264	0.287527
ENSG00000049192	ADAMTS6	protein_coding	5	ADAM metallopeptidase with thrombospondin type 1 motif 6	49.3677	-0.05452	0.27459	-0.19862	0.84256	0.95048
ENSG00000049239	H6PD	protein_coding	1	hexose-6-phosphate dehydrogenase/glucose 1-dehydrogenase	3208.16	0.0287213	0.141813	0.202529	0.839503	0.949685
ENSG00000049245	VAMP3	protein_coding	1	vesicle associated membrane protein 3	7184.73	0.161449	0.0518349	3.11467	0.00184151	0.0284267
ENSG00000049246	PER3	protein_coding	1	period circadian regulator 3	1172.5	0.53699	0.169981	3.15903	0.00158294	0.0251719
ENSG00000049247	UTS2	protein_coding	1	urotensin 2	6.0337	0.522099	0.277654	1.88648	0.0592296	0.300838
ENSG00000049323	LTBP1	protein_coding	2	latent transforming growth factor beta binding protein 1	459.06	-0.873996	0.205332	-4.25654	2.07619e-05	0.000689177
ENSG00000049449	RCN1	protein_coding	11	reticulocalbin 1	5119.97	-0.171435	0.157207	-1.09051	0.275489	0.636409
ENSG00000049541	RFC2	protein_coding	7	replication factor C subunit 2	1852.17	-0.130505	0.194561	-0.670765	0.50237	0.799005
ENSG00000049618	ARID1B	protein_coding	6	AT-rich interaction domain 1B	7818.17	0.248025	0.112607	2.20256	0.0276255	0.190059
ENSG00000049656	CLPTM1L	protein_coding	5	CLPTM1 like	5785.68	-0.0474696	0.0694464	-0.683544	0.494263	0.794258
ENSG00000049759	NEDD4L	protein_coding	18	NEDD4 like E3 ubiquitin protein ligase	11548.2	0.215482	0.0701281	3.07268	0.00212143	0.0315618
ENSG00000049768	FOXP3	protein_coding	X	forkhead box P3	2.87985	-0.380732	0.244245	-1.58373	0.113255	0.42443
ENSG00000049769	PPP1R3F	protein_coding	X	protein phosphatase 1 regulatory subunit 3F	467.027	-0.604752	0.115877	-5.21835	1.80524e-07	9.95226e-06
ENSG00000049860	HEXB	protein_coding	5	hexosaminidase subunit beta	11970.2	0.215499	0.163088	1.32137	0.18638	0.540966
ENSG00000049883	PTCD2	protein_coding	5	pentatricopeptide repeat domain 2	779.777	-0.00452503	0.152905	-0.0295943	0.976391	0.994621
ENSG00000050130	JKAMP	protein_coding	14	JNK1/MAPK8 associated membrane protein	2471.61	0.182273	0.0925488	1.96948	0.0488984	0.269735
ENSG00000050165	DKK3	protein_coding	11	dickkopf WNT signaling pathway inhibitor 3	7286.31	0.155607	0.251896	0.620716	0.534786	0.8156
ENSG00000050327	ARHGEF5	protein_coding	7	Rho guanine nucleotide exchange factor 5	288.289	-0.320609	0.194117	-1.6515	0.0986357	0.395126
ENSG00000050344	NFE2L3	protein_coding	7	nuclear factor, erythroid 2 like 3	349.108	-0.212558	0.267663	-0.797543	0.425136	0.754614
ENSG00000050393	MCUR1	protein_coding	6	mitochondrial calcium uniporter regulator 1	2526.33	0.184112	0.159753	1.15248	0.249125	0.612914
ENSG00000050405	LIMA1	protein_coding	12	LIM domain and actin binding 1	23181.6	0.324174	0.268987	1.2057	0.227934	0.59099
ENSG00000050426	LETMD1	protein_coding	12	LETM1 domain containing 1	2625.74	0.265149	0.0580532	4.56733	4.93973e-06	0.000195185
ENSG00000050438	SLC4A8	protein_coding	12	solute carrier family 4 member 8	86.2191	-0.569789	0.27802	-2.05483	0.0398958	0.239721
ENSG00000050555	LAMC3	protein_coding	9	laminin subunit gamma 3	27.0534	0.0784042	0.256785	0.305492	0.759992	0.921084
ENSG00000050628	PTGER3	protein_coding	1	prostaglandin E receptor 3	34.4497	0.220118	0.254299	0.87328	0.382511	0.724449
ENSG00000050748	MAPK9	protein_coding	5	mitogen-activated protein kinase 9	2293.88	0.211865	0.0619022	3.42257	0.000620331	0.0119823
ENSG00000050820	BCAR1	protein_coding	16	BCAR1 scaffold protein, Cas family member	4695.82	-0.294449	0.129161	-2.2797	0.0226254	0.166518
ENSG00000051009	FAM160A2	protein_coding	11	family with sequence similarity 160 member A2	1739.24	-0.107798	0.0965594	-1.1164	0.264252	0.627394
ENSG00000051108	HERPUD1	protein_coding	16	homocysteine inducible ER protein with ubiquitin like domain 1	4430.43	-0.263445	0.0594771	-4.42935	9.45174e-06	0.00034464
ENSG00000051128	HOMER3	protein_coding	19	homer scaffold protein 3	3857.03	-0.0275163	0.220236	-0.124944	0.900568	0.969936
ENSG00000051180	RAD51	protein_coding	15	RAD51 recombinase	888.245	-0.121611	0.182311	-0.667046	0.504743	0.800413
ENSG00000051341	POLQ	protein_coding	3	DNA polymerase theta	832.725	-0.023903	0.219308	-0.108993	0.913208	0.97472
ENSG00000051382	PIK3CB	protein_coding	3	phosphatidylinositol-4,5-bisphosphate 3-kinase catalytic subunit beta	3195.1	0.118845	0.268946	0.441911	0.658554	0.872976
ENSG00000051523	CYBA	protein_coding	16	cytochrome b-245 alpha chain	7071.3	-0.143566	0.156484	-0.917449	0.358907	0.707025
ENSG00000051596	THOC3	protein_coding	5	THO complex 3	923.809	-0.158981	0.204969	-0.775626	0.43797	0.763143
ENSG00000051620	HEBP2	protein_coding	6	heme binding protein 2	1767.15	0.19362	0.0756676	2.55881	0.010503	0.0982864
ENSG00000051825	MPHOSPH9	protein_coding	12	M-phase phosphoprotein 9	1610.16	0.124092	0.0845341	1.46794	0.14212	0.474282
ENSG00000052126	PLEKHA5	protein_coding	12	pleckstrin homology domain containing A5	6267.55	0.245168	0.262568	0.933886	0.350363	0.699747
ENSG00000052723	SIKE1	protein_coding	1	suppressor of IKBKE 1	1066.82	0.14373	0.135727	1.05897	0.289612	0.651486
ENSG00000052749	RRP12	protein_coding	10	ribosomal RNA processing 12 homolog	1439.18	-0.479258	0.198257	-2.41739	0.0156324	0.130693
ENSG00000052795	FNIP2	protein_coding	4	folliculin interacting protein 2	5245.34	0.343584	0.262924	1.30722	0.191139	0.546724
ENSG00000052802	MSMO1	protein_coding	4	methylsterol monooxygenase 1	3798.36	-0.0173926	0.144476	-0.120385	0.904178	0.971035
ENSG00000052841	TTC17	protein_coding	11	tetratricopeptide repeat domain 17	4722.63	0.121614	0.117133	1.03826	0.29915	0.660175
ENSG00000053108	FSTL4	protein_coding	5	follistatin like 4	8.93706	0.415567	0.258633	1.64084	0.10083	0.399502
ENSG00000053254	FOXN3	protein_coding	14	forkhead box N3	4703.2	0.31166	0.163962	1.90081	0.0573274	0.295803
ENSG00000053371	AKR7A2	protein_coding	1	aldo-keto reductase family 7 member A2	2955.83	-0.0737466	0.125111	-0.589447	0.555562	0.826365
ENSG00000053372	MRTO4	protein_coding	1	MRT4 homolog, ribosome maturation factor	2403.6	-0.341428	0.165265	-2.06593	0.0388353	0.235116
ENSG00000053501	USE1	protein_coding	19	unconventional SNARE in the ER 1	1484.47	0.105504	0.0903327	1.16794	0.24283	0.606787
ENSG00000053524	MCF2L2	protein_coding	3	MCF.2 cell line derived transforming sequence-like 2	32.139	0.0682723	0.216456	0.315431	0.752434	0.917739
ENSG00000053702	NRIP2	protein_coding	12	nuclear receptor interacting protein 2	74.9578	0.190209	0.231895	0.832802	0.404956	0.741029
ENSG00000053747	LAMA3	protein_coding	18	laminin subunit alpha 3	348.216	0.121411	0.227899	0.536473	0.591632	0.841857
ENSG00000053770	AP5M1	protein_coding	14	adaptor related protein complex 5 subunit mu 1	2111.3	0.162149	0.104682	1.54896	0.121392	0.439941
ENSG00000053900	ANAPC4	protein_coding	4	anaphase promoting complex subunit 4	1493.45	0.243226	0.0724877	3.35538	0.00079256	0.0145904
ENSG00000054116	TRAPPC3	protein_coding	1	trafficking protein particle complex 3	3622.43	-0.0381311	0.0656769	-0.580585	0.56152	0.827939
ENSG00000054118	THRAP3	protein_coding	1	thyroid hormone receptor associated protein 3	11852	-0.00357028	0.0664251	-0.0537494	0.957135	0.989116
ENSG00000054148	PHPT1	protein_coding	9	phosphohistidine phosphatase 1	3844.16	-0.0648566	0.0806199	-0.804474	0.421123	0.751461
ENSG00000054219	LY75	protein_coding	2	lymphocyte antigen 75	9.2554	0.393466	0.28007	1.40536	0.159915	0.50089
ENSG00000054267	ARID4B	protein_coding	1	AT-rich interaction domain 4B	2508.33	0.144474	0.134215	1.07643	0.281733	0.643066
ENSG00000054277	OPN3	protein_coding	1	opsin 3	683.1	0.207031	0.0827875	2.50074	0.0123935	0.111029
ENSG00000054282	SDCCAG8	protein_coding	1	SHH signaling and ciliogenesis regulator SDCCAG8	1244.35	0.0290905	0.0929453	0.312986	0.754292	0.91829
ENSG00000054356	PTPRN	protein_coding	2	protein tyrosine phosphatase receptor type N	16.6529	-1.00005	0.256104	-4.68901	2.7453e-06	0.000115972
ENSG00000054392	HHAT	protein_coding	1	hedgehog acyltransferase	1235.54	-0.06578	0.0490472	-1.34116	0.17987	0.532509
ENSG00000054523	KIF1B	protein_coding	1	kinesin family member 1B	5304.23	0.116527	0.112231	1.03828	0.29914	0.660175
ENSG00000054598	FOXC1	protein_coding	6	forkhead box C1	30.3225	-0.112471	0.274805	-0.409556	0.682132	0.884505
ENSG00000054611	TBC1D22A	protein_coding	22	TBC1 domain family member 22A	2232.88	0.0494926	0.0651464	0.759713	0.447426	0.768777
ENSG00000054654	SYNE2	protein_coding	14	spectrin repeat containing nuclear envelope protein 2	10878.8	0.327655	0.103688	3.16001	0.00157764	0.0251177
ENSG00000054690	PLEKHH1	protein_coding	14	pleckstrin homology, MyTH4 and FERM domain containing H1	1742	0.161134	0.281243	0.573274	0.56646	0.829308
ENSG00000054793	ATP9A	protein_coding	20	ATPase phospholipid transporting 9A (putative)	2632.4	-0.135521	0.138043	-0.981728	0.326234	0.681301
ENSG00000054965	FAM168A	protein_coding	11	family with sequence similarity 168 member A	4920.26	0.0821579	0.118465	0.693523	0.487982	0.79116
ENSG00000054967	RELT	protein_coding	11	RELT TNF receptor	708.165	-0.329194	0.144124	-2.28404	0.0223692	0.165335
ENSG00000054983	GALC	protein_coding	14	galactosylceramidase	1658.12	0.209876	0.093233	2.25109	0.0243799	0.175031
ENSG00000055044	NOP58	protein_coding	2	NOP58 ribonucleoprotein	2588.9	-0.082132	0.169024	-0.485918	0.627025	0.859864
ENSG00000055070	SZRD1	protein_coding	1	SUZ RNA binding domain containing 1	12601.3	-0.0278911	0.127265	-0.21916	0.826526	0.946446
ENSG00000055130	CUL1	protein_coding	7	cullin 1	3830.55	-0.0488458	0.107058	-0.456254	0.648208	0.868511
ENSG00000055147	FAM114A2	protein_coding	5	family with sequence similarity 114 member A2	1375.21	0.0649979	0.0728255	0.892518	0.372115	0.717751
ENSG00000055163	CYFIP2	protein_coding	5	cytoplasmic FMR1 interacting protein 2	947.203	0.0173133	0.279491	0.061946	0.950606	0.986538
ENSG00000055208	TAB2	protein_coding	6	TGF-beta activated kinase 1 (MAP3K7) binding protein 2	4345.9	0.214673	0.11983	1.79148	0.0732165	0.337562
ENSG00000055211	GINM1	protein_coding	6	glycoprotein integral membrane 1	2109.5	0.105111	0.164315	0.639693	0.522372	0.809098
ENSG00000055332	EIF2AK2	protein_coding	2	eukaryotic translation initiation factor 2 alpha kinase 2	4012.8	0.191585	0.213826	0.89599	0.370258	0.71657
ENSG00000055483	USP36	protein_coding	17	ubiquitin specific peptidase 36	2830.69	-0.232486	0.178376	-1.30335	0.192456	0.548341
ENSG00000055609	KMT2C	protein_coding	7	lysine methyltransferase 2C	7656.93	0.217688	0.14789	1.47196	0.14103	0.472157
ENSG00000055732	MCOLN3	protein_coding	1	mucolipin 3	1706.87	0.334779	0.237927	1.40718	0.159374	0.500171
ENSG00000055813	CCDC85A	protein_coding	2	coiled-coil domain containing 85A	147.04	0.250676	0.26927	0.936063	0.349241	0.699032
ENSG00000055917	PUM2	protein_coding	2	pumilio RNA binding family member 2	6240.44	0.213247	0.0760903	2.80254	0.00507016	0.0598061
ENSG00000055950	MRPL43	protein_coding	10	mitochondrial ribosomal protein L43	3137.03	-0.142404	0.0684577	-2.08017	0.0375097	0.230583
ENSG00000055955	ITIH4	protein_coding	3	inter-alpha-trypsin inhibitor heavy chain 4	20.2561	0.0246139	0.228946	0.107543	0.914358	0.97472
ENSG00000056050	HPF1	protein_coding	4	histone PARylation factor 1	769.26	0.378373	0.121275	3.11986	0.00180936	0.0279804
ENSG00000056097	ZFR	protein_coding	5	zinc finger RNA binding protein	6257.03	0.0484328	0.0660705	0.733047	0.46353	0.777124
ENSG00000056277	ZNF280C	protein_coding	X	zinc finger protein 280C	206.541	0.213282	0.11753	1.8146	0.069586	0.328468
ENSG00000056291	NPFFR2	protein_coding	4	neuropeptide FF receptor 2	13.0098	-0.0640158	0.28135	-0.227206	0.820263	0.944546
ENSG00000056487	PHF21B	protein_coding	22	PHD finger protein 21B	7.37592	0.337351	0.273515	1.23029	0.21859	0.58066
ENSG00000056558	TRAF1	protein_coding	9	TNF receptor associated factor 1	2394.32	-0.936991	0.276499	-3.41226	0.000644263	0.0123531
ENSG00000056586	RC3H2	protein_coding	9	ring finger and CCCH-type domains 2	4870.64	0.113818	0.0766884	1.48417	0.137765	0.46646
ENSG00000056736	IL17RB	protein_coding	3	interleukin 17 receptor B	9.34064	0.137766	0.277945	0.494915	0.62066	0.856299
ENSG00000056972	TRAF3IP2	protein_coding	6	TRAF3 interacting protein 2	2108.87	-0.163413	0.270175	-0.604915	0.545236	0.821407
ENSG00000056998	GYG2	protein_coding	X	glycogenin 2	4120.29	0.34202	0.155049	2.20588	0.0273924	0.189018
ENSG00000057019	DCBLD2	protein_coding	3	discoidin, CUB and LCCL domain containing 2	13108.7	-1.39416	0.194943	-7.15355	8.45595e-13	9.92929e-11
ENSG00000057252	SOAT1	protein_coding	1	sterol O-acyltransferase 1	5861.62	-0.000235667	0.243777	-0.000968764	0.999227	0.999756
ENSG00000057468	MSH4	protein_coding	1	mutS homolog 4	16.8395	-0.218956	0.251193	-0.871444	0.383512	0.725448
ENSG00000057593	F7	protein_coding	13	coagulation factor VII	18.8178	0.14065	0.278941	0.504845	0.613667	0.851945
ENSG00000057608	GDI2	protein_coding	10	GDP dissociation inhibitor 2	13470.2	-0.0297018	0.0955329	-0.310907	0.755871	0.919021
ENSG00000057657	PRDM1	protein_coding	6	PR/SET domain 1	31.9053	-0.28315	0.252752	-1.11944	0.262954	0.626172
ENSG00000057663	ATG5	protein_coding	6	autophagy related 5	1417.54	0.0673904	0.139541	0.482943	0.629136	0.860601
ENSG00000057704	TMCC3	protein_coding	12	transmembrane and coiled-coil domain family 3	136.87	-0.0375328	0.18622	-0.201569	0.840254	0.949689
ENSG00000057757	PITHD1	protein_coding	1	PITH domain containing 1	2220.86	0.190592	0.0739001	2.57905	0.00990736	0.0948478
ENSG00000057935	MTA3	protein_coding	2	metastasis associated 1 family member 3	2140.16	0.14809	0.0678315	2.18321	0.0290204	0.196403
ENSG00000058056	USP13	protein_coding	3	ubiquitin specific peptidase 13	2864.25	-0.377534	0.0761099	-4.96035	7.03674e-07	3.40913e-05
ENSG00000058063	ATP11B	protein_coding	3	ATPase phospholipid transporting 11B (putative)	4810.2	0.163944	0.0859001	1.90854	0.0563211	0.292938
ENSG00000058085	LAMC2	protein_coding	1	laminin subunit gamma 2	66.8479	-0.583506	0.269923	-2.22497	0.0260832	0.182815
ENSG00000058091	CDK14	protein_coding	7	cyclin dependent kinase 14	229.205	0.0321875	0.240704	0.133732	0.893615	0.967289
ENSG00000058262	SEC61A1	protein_coding	3	SEC61 translocon subunit alpha 1	17184.3	-0.113784	0.110811	-1.02683	0.3045	0.663492
ENSG00000058272	PPP1R12A	protein_coding	12	protein phosphatase 1 regulatory subunit 12A	3769.2	0.145622	0.179654	0.810573	0.417611	0.74876
ENSG00000058335	RASGRF1	protein_coding	15	Ras protein specific guanine nucleotide releasing factor 1	188.94	-0.274127	0.248418	-1.10346	0.269829	0.631274
ENSG00000058453	CROCC	protein_coding	1	ciliary rootlet coiled-coil, rootletin	3123.98	0.000952992	0.170038	0.00560348	0.995529	0.998851
ENSG00000058600	POLR3E	protein_coding	16	RNA polymerase III subunit E	1676.18	-0.213721	0.151607	-1.40969	0.158632	0.499689
ENSG00000058668	ATP2B4	protein_coding	1	ATPase plasma membrane Ca2+ transporting 4	18645.1	0.106109	0.245099	0.432927	0.665068	0.877149
ENSG00000058673	ZC3H11A	protein_coding	1	zinc finger CCCH-type containing 11A	214.501	0.0530387	0.099896	0.530927	0.59547	0.842766
ENSG00000058729	RIOK2	protein_coding	5	RIO kinase 2	975.371	0.085119	0.115891	0.73447	0.462663	0.776605
ENSG00000058799	YIPF1	protein_coding	1	Yip1 domain family member 1	1838.72	-0.00446546	0.0529211	-0.0843798	0.932754	0.98095
ENSG00000058804	NDC1	protein_coding	1	NDC1 transmembrane nucleoporin	1237.66	-0.0499948	0.186037	-0.268734	0.788134	0.931694
ENSG00000058866	DGKG	protein_coding	3	diacylglycerol kinase gamma	45.1401	-1.00088	0.240896	-4.14269	3.43261e-05	0.00106483
ENSG00000059122	FLYWCH1	protein_coding	16	FLYWCH-type zinc finger 1	3954.33	0.0320896	0.195969	0.163749	0.869929	0.959761
ENSG00000059145	UNKL	protein_coding	16	unk like zinc finger	1076.56	0.114918	0.0984205	1.16762	0.24296	0.606787
ENSG00000059377	TBXAS1	protein_coding	7	thromboxane A synthase 1	66.0445	-1.12354	0.159546	-7.01654	2.27432e-12	2.59723e-10
ENSG00000059378	PARP12	protein_coding	7	poly(ADP-ribose) polymerase family member 12	1027.5	-0.153054	0.224316	-0.682313	0.495041	0.795048
ENSG00000059573	ALDH18A1	protein_coding	10	aldehyde dehydrogenase 18 family member A1	3519.88	-0.109908	0.0991564	-1.10843	0.267677	0.629272
ENSG00000059588	TARBP1	protein_coding	1	TAR (HIV-1) RNA binding protein 1	1964.77	0.213964	0.10892	1.96441	0.049483	0.271483
ENSG00000059691	GATB	protein_coding	4	glutamyl-tRNA amidotransferase subunit B	1744.4	-0.00274117	0.109229	-0.0250962	0.979978	0.995316
ENSG00000059728	MXD1	protein_coding	2	MAX dimerization protein 1	457.631	0.300031	0.109243	2.74642	0.00602504	0.0675387
ENSG00000059758	CDK17	protein_coding	12	cyclin dependent kinase 17	1870.53	-0.0904946	0.152917	-0.591786	0.553994	0.82551
ENSG00000059769	DNAJC25	protein_coding	9	DnaJ heat shock protein family (Hsp40) member C25	446.239	0.0983713	0.139266	0.706329	0.479983	0.787059
ENSG00000059804	SLC2A3	protein_coding	12	solute carrier family 2 member 3	2272.26	-0.643832	0.109355	-5.88741	3.92306e-09	2.86491e-07
ENSG00000059915	PSD	protein_coding	10	pleckstrin and Sec7 domain containing	23.7416	0.0316341	0.266506	0.118667	0.905539	0.971893
ENSG00000060069	CTDP1	protein_coding	18	CTD phosphatase subunit 1	1859.79	-0.0162883	0.118172	-0.137836	0.89037	0.966669
ENSG00000060138	YBX3	protein_coding	12	Y-box binding protein 3	5622.01	-0.050405	0.158397	-0.318221	0.750318	0.916919
ENSG00000060140	STYK1	protein_coding	12	serine/threonine/tyrosine kinase 1	47.8977	0.103237	0.232302	0.446407	0.655303	0.871558
ENSG00000060237	WNK1	protein_coding	12	WNK lysine deficient protein kinase 1	16037.1	0.00742852	0.109061	0.0681127	0.945696	0.984706
ENSG00000060339	CCAR1	protein_coding	10	cell division cycle and apoptosis regulator 1	5124.45	-0.0698466	0.0597765	-1.16846	0.24262	0.606594
ENSG00000060491	OGFR	protein_coding	20	opioid growth factor receptor	3904.64	-0.162897	0.0964274	-1.68932	0.0911582	0.380524
ENSG00000060558	GNA15	protein_coding	19	G protein subunit alpha 15	3.59349	0.0821933	0.112075	0.866482
ENSG00000060566	CREB3L3	protein_coding	19	cAMP responsive element binding protein 3 like 3	4.26355	0.06571	0.230219	0.286033	0.774853	0.926188
ENSG00000060642	PIGV	protein_coding	1	phosphatidylinositol glycan anchor biosynthesis class V	1345.69	-0.00388408	0.053147	-0.0730823	0.941741	0.983524
ENSG00000060656	PTPRU	protein_coding	1	protein tyrosine phosphatase receptor type U	4456.33	-0.128268	0.281046	-0.456589	0.647967	0.868417
ENSG00000060688	SNRNP40	protein_coding	1	small nuclear ribonucleoprotein U5 subunit 40	1594.69	-0.195925	0.0972525	-2.01459	0.0439475	0.253693
ENSG00000060718	COL11A1	protein_coding	1	collagen type XI alpha 1 chain	47162.7	0.0885747	0.276501	0.320462	0.748618	0.915933
ENSG00000060749	QSER1	protein_coding	11	glutamine and serine rich 1	2230.17	0.111512	0.11314	0.985617	0.324321	0.680348
ENSG00000060762	MPC1	protein_coding	6	mitochondrial pyruvate carrier 1	1172.25	0.170564	0.170378	1.00107	0.316792	0.674885
ENSG00000060971	ACAA1	protein_coding	3	acetyl-CoA acyltransferase 1	4885.56	-0.200623	0.0970893	-2.06637	0.0387933	0.235067
ENSG00000060982	BCAT1	protein_coding	12	branched chain amino acid transaminase 1	79.0636	-0.101988	0.173345	-0.588326	0.556313	0.826933
ENSG00000061273	HDAC7	protein_coding	12	histone deacetylase 7	5655.34	0.0104067	0.206752	0.0503329	0.959857	0.990098
ENSG00000061337	LZTS1	protein_coding	8	leucine zipper tumor suppressor 1	11639.5	-0.0765645	0.271212	-0.282316	0.777701	0.927415
ENSG00000061455	PRDM6	protein_coding	5	PR/SET domain 6	9.45476	0.0329823	0.281172	0.117521	0.906447	0.972221
ENSG00000061656	SPAG4	protein_coding	20	sperm associated antigen 4	138.79	-0.0293554	0.165317	-0.177577	0.859055	0.95665
ENSG00000061676	NCKAP1	protein_coding	2	NCK associated protein 1	9245.92	0.166783	0.0984661	1.69381	0.0903008	0.379077
ENSG00000061794	MRPS35	protein_coding	12	mitochondrial ribosomal protein S35	1675.4	-0.0753721	0.136776	-0.551062	0.581591	0.836352
ENSG00000061918	GUCY1B1	protein_coding	4	guanylate cyclase 1 soluble subunit beta 1	224.867	-0.0849408	0.217037	-0.391346	0.695542	0.892307
ENSG00000061936	SFSWAP	protein_coding	12	splicing factor SWAP	5275.37	0.135864	0.0945907	1.43634	0.150906	0.487629
ENSG00000061938	TNK2	protein_coding	3	tyrosine kinase non receptor 2	4457.96	-0.0985411	0.102853	-0.958079	0.338023	0.690531
ENSG00000061987	MON2	protein_coding	12	MON2 homolog, regulator of endosome-to-Golgi trafficking	3292.76	0.291895	0.151846	1.92231	0.0545665	0.288138
ENSG00000062038	CDH3	protein_coding	16	cadherin 3	11583	0.121103	0.250688	0.484556	0.627992	0.86011
ENSG00000062194	GPBP1	protein_coding	5	GC-rich promoter binding protein 1	3407.84	0.16161	0.0866475	1.86514	0.0621616	0.30959
ENSG00000062282	DGAT2	protein_coding	11	diacylglycerol O-acyltransferase 2	78.613	-0.75392	0.275545	-2.74529	0.00604575	0.0676321
ENSG00000062370	ZNF112	protein_coding	19	zinc finger protein 112	513.434	0.1788	0.0725581	2.46421	0.0137316	0.119726
ENSG00000062485	CS	protein_coding	12	citrate synthase	10713.1	-0.0440301	0.0640011	-0.68796	0.491478	0.79267
ENSG00000062524	LTK	protein_coding	15	leukocyte receptor tyrosine kinase	83.6989	0.551811	0.275443	2.0072	0.0447284	0.256239
ENSG00000062582	MRPS24	protein_coding	7	mitochondrial ribosomal protein S24	1211.02	-0.00535922	0.167031	-0.0320862	0.974403	0.993914
ENSG00000062598	ELMO2	protein_coding	20	engulfment and cell motility 2	4398.03	-0.154544	0.0809746	-1.90855	0.0563202	0.292938
ENSG00000062650	WAPL	protein_coding	10	WAPL cohesin release factor	3597.16	0.115456	0.0727178	1.58772	0.11235	0.422716
ENSG00000062716	VMP1	protein_coding	17	vacuole membrane protein 1	5182.52	-0.0941766	0.0678215	-1.3886	0.164956	0.508822
ENSG00000062725	APPBP2	protein_coding	17	amyloid beta precursor protein binding protein 2	2410.58	0.326045	0.122908	2.65274	0.00798412	0.0823533
ENSG00000062822	POLD1	protein_coding	19	DNA polymerase delta 1, catalytic subunit	2047.58	-0.142388	0.147954	-0.962373	0.335862	0.688622
ENSG00000063046	EIF4B	protein_coding	12	eukaryotic translation initiation factor 4B	33838.6	0.10318	0.0816044	1.26439	0.20609	0.56462
ENSG00000063127	SLC6A16	protein_coding	19	solute carrier family 6 member 16	35.8389	0.343971	0.273962	1.25655	0.208917	0.567895
ENSG00000063169	BICRA	protein_coding	19	BRD4 interacting chromatin remodeling complex associated protein	1069.44	0.029325	0.123697	0.237072	0.812601	0.941015
ENSG00000063176	SPHK2	protein_coding	19	sphingosine kinase 2	1888.04	-0.163955	0.141031	-1.16254	0.245017	0.608908
ENSG00000063177	RPL18	protein_coding	19	ribosomal protein L18	29612.2	-0.0830706	0.123805	-0.670979	0.502234	0.799005
ENSG00000063180	CA11	protein_coding	19	carbonic anhydrase 11	660.26	-0.435989	0.173702	-2.50989	0.012077	0.10919
ENSG00000063241	ISOC2	protein_coding	19	isochorismatase domain containing 2	1815.14	-0.255296	0.185278	-1.37791	0.168232	0.513668
ENSG00000063244	U2AF2	protein_coding	19	U2 small nuclear RNA auxiliary factor 2	11719.5	-0.260668	0.0987056	-2.64086	0.00826969	0.0842949
ENSG00000063245	EPN1	protein_coding	19	epsin 1	7622.44	-0.0994623	0.0850014	-1.17013	0.241951	0.605907
ENSG00000063322	MED29	protein_coding	19	mediator complex subunit 29	3573.81	-0.0167633	0.0869292	-0.192839	0.847085	0.952124
ENSG00000063438	AHRR	protein_coding	5	aryl-hydrocarbon receptor repressor	688.466	0.212523	0.151932	1.39882	0.161868	0.503701
ENSG00000063587	ZNF275	protein_coding	X	zinc finger protein 275	1014.78	-0.0379616	0.0613448	-0.618825	0.536032	0.816302
ENSG00000063601	MTMR1	protein_coding	X	myotubularin related protein 1	1508.58	0.138426	0.181805	0.761397	0.44642	0.768457
ENSG00000063660	GPC1	protein_coding	2	glypican 1	8318.5	0.0165354	0.28005	0.0590428	0.952918	0.987409
ENSG00000063761	ADCK1	protein_coding	14	aarF domain containing kinase 1	620.782	0.0307495	0.232266	0.132387	0.894678	0.967683
ENSG00000063854	HAGH	protein_coding	16	hydroxyacylglutathione hydrolase	2606.56	-0.270837	0.096324	-2.81172	0.00492773	0.0586923
ENSG00000063978	RNF4	protein_coding	4	ring finger protein 4	4959.89	-0.104696	0.0908537	-1.15236	0.249173	0.612948
ENSG00000064012	CASP8	protein_coding	2	caspase 8	806.095	-0.0158086	0.113379	-0.13943	0.88911	0.966135
ENSG00000064042	LIMCH1	protein_coding	4	LIM and calponin homology domains 1	2292.41	0.135287	0.199418	0.693278	0.488135	0.79116
ENSG00000064102	INTS13	protein_coding	12	integrator complex subunit 13	1498.51	-0.0303389	0.123598	-0.245464	0.806097	0.939196
ENSG00000064115	TM7SF3	protein_coding	12	transmembrane 7 superfamily member 3	8167.85	-0.042869	0.233659	-0.18347	0.854429	0.954822
ENSG00000064199	SPA17	protein_coding	11	sperm autoantigenic protein 17	468.134	-0.048909	0.122902	-0.397948	0.690669	0.888897
ENSG00000064205	CCN5	protein_coding	20	cellular communication network factor 5	383.1	0.202032	0.220247	0.94101	0.3467	0.696506
ENSG00000064225	ST3GAL6	protein_coding	3	ST3 beta-galactoside alpha-2,3-sialyltransferase 6	3091.7	0.454672	0.130325	3.48873	0.000485326	0.00984099
ENSG00000064300	NGFR	protein_coding	17	nerve growth factor receptor	109923	-0.0610231	0.237025	-0.257793	0.796567	0.93585
ENSG00000064309	CDON	protein_coding	11	cell adhesion associated, oncogene regulated	1229.23	0.0599723	0.262925	0.228093	0.819574	0.944446
ENSG00000064313	TAF2	protein_coding	8	TATA-box binding protein associated factor 2	1964.85	0.0691771	0.0731558	0.945612	0.344347	0.695047
ENSG00000064393	HIPK2	protein_coding	7	homeodomain interacting protein kinase 2	8267.61	0.124768	0.217338	0.574076	0.565916	0.829234
ENSG00000064419	TNPO3	protein_coding	7	transportin 3	5666.1	-0.0889502	0.0574299	-1.54885	0.121418	0.439941
ENSG00000064489	BORCS8-MEF2B	protein_coding	19	BORCS8-MEF2B readthrough	4.89852	0.144978	0.277099	0.523476	0.600643	0.845619
ENSG00000064490	RFXANK	protein_coding	19	regulatory factor X associated ankyrin containing protein	2131.42	-0.218228	0.0853327	-2.55737	0.0105467	0.0985623
ENSG00000064545	TMEM161A	protein_coding	19	transmembrane protein 161A	1471.37	-0.156867	0.101449	-1.54626	0.122042	0.441097
ENSG00000064547	LPAR2	protein_coding	19	lysophosphatidic acid receptor 2	376.737	-0.213196	0.246887	-0.863615	0.387799	0.727504
ENSG00000064601	CTSA	protein_coding	20	cathepsin A	22240.1	-0.0259535	0.117849	-0.220228	0.825694	0.946346
ENSG00000064607	SUGP2	protein_coding	19	SURP and G-patch domain containing 2	8220.72	-0.0138268	0.0559072	-0.247318	0.804663	0.93863
ENSG00000064651	SLC12A2	protein_coding	5	solute carrier family 12 member 2	2125.72	0.357752	0.254212	1.40763	0.159242	0.500028
ENSG00000064652	SNX24	protein_coding	5	sorting nexin 24	1379.04	-0.254508	0.164113	-1.55082	0.120945	0.439196
ENSG00000064666	CNN2	protein_coding	19	calponin 2	6207.62	0.0446467	0.2547	0.17529	0.860852	0.956993
ENSG00000064687	ABCA7	protein_coding	19	ATP binding cassette subfamily A member 7	1443.57	0.0973142	0.154253	0.630868	0.528127	0.812778
ENSG00000064703	DDX20	protein_coding	1	DEAD-box helicase 20	1499.67	0.0917207	0.162668	0.563846	0.572859	0.832553
ENSG00000064726	BTBD1	protein_coding	15	BTB domain containing 1	4896.2	-0.0158831	0.0936725	-0.16956	0.865356	0.957824
ENSG00000064763	FAR2	protein_coding	12	fatty acyl-CoA reductase 2	1099.83	0.133481	0.280814	0.475556	0.634391	0.862848
ENSG00000064787	BCAS1	protein_coding	20	brain enriched myelin associated protein 1	2030.36	0.199787	0.192517	1.10425	0.269485	0.630884
ENSG00000064886	CHI3L2	protein_coding	1	chitinase 3 like 2	2.02765	0.247346	0.185041	1.46575	0.142717	0.475093
ENSG00000064932	SBNO2	protein_coding	19	strawberry notch homolog 2	4922.38	-0.193105	0.114982	-1.67944	0.0930662	0.384809
ENSG00000064933	PMS1	protein_coding	2	PMS1 homolog 1, mismatch repair system component	899.261	0.337944	0.0893503	3.78217	0.000155465	0.00388364
ENSG00000064961	HMG20B	protein_coding	19	high mobility group 20B	72137.7	-0.0165094	0.182011	-0.0907074	0.927725	0.978793
ENSG00000064989	CALCRL	protein_coding	2	calcitonin receptor like receptor	19.1207	0.410107	0.280675	1.46298	0.143473	0.476045
ENSG00000064995	TAF11	protein_coding	6	TATA-box binding protein associated factor 11	1914.48	0.115681	0.0781154	1.4809	0.138634	0.467522
ENSG00000064999	ANKS1A	protein_coding	6	ankyrin repeat and sterile alpha motif domain containing 1A	3923.69	-0.193803	0.0909354	-2.13122	0.033071	0.213264
ENSG00000065000	AP3D1	protein_coding	19	adaptor related protein complex 3 subunit delta 1	12128.3	-0.117313	0.123092	-0.953055	0.340562	0.691843
ENSG00000065029	ZNF76	protein_coding	6	zinc finger protein 76	2381.95	0.0469686	0.0611255	0.768396	0.442252	0.765597
ENSG00000065054	SLC9A3R2	protein_coding	16	SLC9A3 regulator 2	1536.08	-0.0289106	0.281043	-0.102881	0.918057	0.975556
ENSG00000065057	NTHL1	protein_coding	16	nth like DNA glycosylase 1	932.367	-0.118994	0.155057	-0.767414	0.442835	0.766225
ENSG00000065060	UHRF1BP1	protein_coding	6	UHRF1 binding protein 1	1578.51	0.0252235	0.190121	0.132669	0.894455	0.967592
ENSG00000065135	GNAI3	protein_coding	1	G protein subunit alpha i3	3321.99	0.0338761	0.0727028	0.465952	0.64125	0.865058
ENSG00000065150	IPO5	protein_coding	13	importin 5	7532.87	0.0456639	0.125455	0.363984	0.71587	0.901408
ENSG00000065154	OAT	protein_coding	10	ornithine aminotransferase	8761.49	0.00343201	0.0606516	0.0565852	0.954876	0.988353
ENSG00000065183	WDR3	protein_coding	1	WD repeat domain 3	2617.66	0.0338293	0.198527	0.170402	0.864694	0.957739
ENSG00000065243	PKN2	protein_coding	1	protein kinase N2	3429.77	0.311434	0.0999932	3.11454	0.00184232	0.0284267
ENSG00000065268	WDR18	protein_coding	19	WD repeat domain 18	2006.54	-0.252867	0.0952715	-2.65415	0.0079508	0.082132
ENSG00000065308	TRAM2	protein_coding	6	translocation associated membrane protein 2	14463.9	-0.0442232	0.24398	-0.18126	0.856163	0.955629
ENSG00000065320	NTN1	protein_coding	17	netrin 1	59.5682	-0.223349	0.249534	-0.904934	0.3655	0.712076
ENSG00000065328	MCM10	protein_coding	10	minichromosome maintenance 10 replication initiation factor	719.668	-0.05427	0.20541	-0.264197	0.791628	0.933145
ENSG00000065357	DGKA	protein_coding	12	diacylglycerol kinase alpha	2145.47	0.0393828	0.277527	0.141914	0.887148	0.965314
ENSG00000065361	ERBB3	protein_coding	12	erb-b2 receptor tyrosine kinase 3	27805.4	0.173393	0.268982	0.644707	0.519117	0.80734
ENSG00000065371	ROPN1	protein_coding	3	rhophilin associated tail protein 1	152.066	-0.311246	0.276087	-1.13281	0.257293	0.620523
ENSG00000065413	ANKRD44	protein_coding	2	ankyrin repeat domain 44	2343.17	0.317025	0.192568	1.64631	0.0997005	0.397273
ENSG00000065427	KARS1	protein_coding	16	lysyl-tRNA synthetase 1	6472.88	-0.0976979	0.121941	-0.801191	0.423021	0.753003
ENSG00000065457	ADAT1	protein_coding	16	adenosine deaminase tRNA specific 1	1829.85	0.0489609	0.210663	0.232411	0.816219	0.942985
ENSG00000065485	PDIA5	protein_coding	3	protein disulfide isomerase family A member 5	1133.2	0.00145794	0.219202	0.00664982	0.994694	0.998851
ENSG00000065491	TBC1D22B	protein_coding	6	TBC1 domain family member 22B	1141.77	0.0532971	0.076351	0.698053	0.485144	0.789975
ENSG00000065518	NDUFB4	protein_coding	3	NADH:ubiquinone oxidoreductase subunit B4	3803.13	-0.0192069	0.0914515	-0.210023	0.83365	0.948898
ENSG00000065526	SPEN	protein_coding	1	spen family transcriptional repressor	5459.45	-0.0467646	0.0520932	-0.897711	0.36934	0.715477
ENSG00000065534	MYLK	protein_coding	3	myosin light chain kinase	2607.41	0.108296	0.278544	0.388977	0.697293	0.892825
ENSG00000065548	ZC3H15	protein_coding	2	zinc finger CCCH-type containing 15	2770.11	-0.0546384	0.10277	-0.531659	0.594962	0.842726
ENSG00000065559	MAP2K4	protein_coding	17	mitogen-activated protein kinase kinase 4	1574.64	0.153813	0.0768853	2.00055	0.0454411	0.258338
ENSG00000065600	PACC1	protein_coding	1	proton activated chloride channel 1	1213.14	-0.0134271	0.0978267	-0.137254	0.89083	0.966841
ENSG00000065613	SLK	protein_coding	10	STE20 like kinase	3917.07	-0.016304	0.0903284	-0.180497	0.856762	0.955814
ENSG00000065615	CYB5R4	protein_coding	6	cytochrome b5 reductase 4	954.125	0.149536	0.12402	1.20573	0.227921	0.59099
ENSG00000065618	COL17A1	protein_coding	10	collagen type XVII alpha 1 chain	4.92597	-0.48003	0.271838	-1.77759	0.0754711	0.343222
ENSG00000065621	GSTO2	protein_coding	10	glutathione S-transferase omega 2	226.867	-0.220221	0.240035	-0.917423	0.358921	0.707025
ENSG00000065665	SEC61A2	protein_coding	10	SEC61 translocon subunit alpha 2	541.354	0.155394	0.131832	1.1787	0.238516	0.601828
ENSG00000065675	PRKCQ	protein_coding	10	protein kinase C theta	6.2137	0.264799	0.280003	0.945029	0.344644	0.695228
ENSG00000065717	TLE2	protein_coding	19	TLE family member 2, transcriptional corepressor	194.704	0.227678	0.276583	0.823529	0.410207	0.74431
ENSG00000065802	ASB1	protein_coding	2	ankyrin repeat and SOCS box containing 1	2258.6	-0.098954	0.0795148	-1.24448	0.213325	0.573947
ENSG00000065809	FAM107B	protein_coding	10	family with sequence similarity 107 member B	1219.17	0.390752	0.214725	1.81986	0.0687805	0.326966
ENSG00000065833	ME1	protein_coding	6	malic enzyme 1	1161.71	-0.415796	0.234038	-1.77683	0.0755956	0.343292
ENSG00000065882	TBC1D1	protein_coding	4	TBC1 domain family member 1	3456.74	0.144467	0.0719032	2.00919	0.0445174	0.255382
ENSG00000065883	CDK13	protein_coding	7	cyclin dependent kinase 13	3222.25	0.1029	0.0505818	2.03434	0.0419177	0.247179
ENSG00000065911	MTHFD2	protein_coding	2	methylenetetrahydrofolate dehydrogenase (NADP+ dependent) 2, methenyltetrahydrofolate cyclohydrolase	1425.81	-0.0371284	0.190332	-0.195073	0.845336	0.951471
ENSG00000065923	SLC9A7	protein_coding	X	solute carrier family 9 member A7	487.479	-0.879451	0.271138	-3.47191	0.000516776	0.0103475
ENSG00000065970	FOXJ2	protein_coding	12	forkhead box J2	1609.17	-0.023938	0.0855896	-0.279685	0.779719	0.928145
ENSG00000065978	YBX1	protein_coding	1	Y-box binding protein 1	33901.3	-0.159233	0.194978	-0.816675	0.414114	0.746576
ENSG00000065989	PDE4A	protein_coding	19	phosphodiesterase 4A	1824.8	0.117187	0.120287	0.974236	0.329939	0.684594
ENSG00000066027	PPP2R5A	protein_coding	1	protein phosphatase 2 regulatory subunit B'alpha	2140.59	0.0795335	0.137165	0.579834	0.562027	0.828099
ENSG00000066032	CTNNA2	protein_coding	2	catenin alpha 2	123.301	0.366453	0.281336	1.30638	0.191425	0.547068
ENSG00000066044	ELAVL1	protein_coding	19	ELAV like RNA binding protein 1	4381.03	-0.0658605	0.0491194	-1.34082	0.179978	0.53261
ENSG00000066056	TIE1	protein_coding	1	tyrosine kinase with immunoglobulin like and EGF like domains 1	37.2773	-0.447917	0.241048	-1.98349	0.0473122	0.264398
ENSG00000066084	DIP2B	protein_coding	12	disco interacting protein 2 homolog B	10201.4	0.255198	0.0873141	2.92276	0.00346947	0.0455236
ENSG00000066117	SMARCD1	protein_coding	12	SWI/SNF related, matrix associated, actin dependent regulator of chromatin, subfamily d, member 1	6781.66	-0.057056	0.0634599	-0.899088	0.368606	0.714855
ENSG00000066135	KDM4A	protein_coding	1	lysine demethylase 4A	2740.49	0.109207	0.0600395	1.81892	0.0689231	0.327219
ENSG00000066136	NFYC	protein_coding	1	nuclear transcription factor Y subunit gamma	2560.11	-0.023913	0.0958222	-0.249557	0.80293	0.938188
ENSG00000066185	ZMYND12	protein_coding	1	zinc finger MYND-type containing 12	114.26	0.381001	0.158452	2.40425	0.0162056	0.134108
ENSG00000066230	SLC9A3	protein_coding	5	solute carrier family 9 member A3	116.169	0.0645522	0.242506	0.266158	0.790117	0.932216
ENSG00000066279	ASPM	protein_coding	1	assembly factor for spindle microtubules	2445.22	0.156978	0.221216	0.709614	0.477943	0.786099
ENSG00000066294	CD84	protein_coding	1	CD84 molecule	5.86189	0.293537	0.247032	1.20626	0.227717	0.59099
ENSG00000066322	ELOVL1	protein_coding	1	ELOVL fatty acid elongase 1	7680.04	-0.268572	0.0582521	-4.6105	4.01692e-06	0.000161485
ENSG00000066379	POLR1H	protein_coding	6	RNA polymerase I subunit H	806.909	-0.0210748	0.122802	-0.171615	0.86374	0.957707
ENSG00000066382	MPPED2	protein_coding	11	metallophosphoesterase domain containing 2	360.521	0.151419	0.270744	0.560236	0.575318	0.833792
ENSG00000066422	ZBTB11	protein_coding	3	zinc finger and BTB domain containing 11	1705.21	0.0924676	0.0833413	1.10951	0.267212	0.628933
ENSG00000066427	ATXN3	protein_coding	14	ataxin 3	968.573	0.155174	0.106283	1.45999	0.144292	0.477196
ENSG00000066455	GOLGA5	protein_coding	14	golgin A5	2909.52	0.0901061	0.112249	0.802736	0.422127	0.752185
ENSG00000066468	FGFR2	protein_coding	10	fibroblast growth factor receptor 2	17.4593	0.361054	0.240048	1.56745	0.11701	0.432269
ENSG00000066557	LRRC40	protein_coding	1	leucine rich repeat containing 40	787.101	0.260276	0.140551	1.85181	0.0640531	0.314352
ENSG00000066583	ISOC1	protein_coding	5	isochorismatase domain containing 1	398.706	-0.213396	0.21794	-0.979118	0.327522	0.682564
ENSG00000066629	EML1	protein_coding	14	EMAP like 1	346.47	-0.0100354	0.255978	-0.0392039	0.968728	0.992976
ENSG00000066651	TRMT11	protein_coding	6	tRNA methyltransferase 11 homolog	573.499	0.145953	0.11851	1.23156	0.218112	0.580069
ENSG00000066654	THUMPD1	protein_coding	16	THUMP domain containing 1	1820.26	0.191865	0.0895132	2.14341	0.0320798	0.209325
ENSG00000066697	MSANTD3	protein_coding	9	Myb/SANT DNA binding domain containing 3	3241.76	0.0922858	0.194477	0.474531	0.635122	0.863108
ENSG00000066735	KIF26A	protein_coding	14	kinesin family member 26A	11.5394	-0.156062	0.276687	-0.563261	0.573257	0.832896
ENSG00000066739	ATG2B	protein_coding	14	autophagy related 2B	4637.43	0.249852	0.114323	2.18549	0.0288532	0.195617
ENSG00000066777	ARFGEF1	protein_coding	8	ADP ribosylation factor guanine nucleotide exchange factor 1	3424.49	0.215919	0.0982716	2.19716	0.0280093	0.191621
ENSG00000066827	ZFAT	protein_coding	8	zinc finger and AT-hook domain containing	1055.98	-0.0171959	0.105689	-0.162703	0.870752	0.959989
ENSG00000066855	MTFR1	protein_coding	8	mitochondrial fission regulator 1	1154.77	-0.0429451	0.151957	-0.282614	0.777473	0.927346
ENSG00000066923	STAG3	protein_coding	7	stromal antigen 3	81.8133	0.130071	0.184005	0.706854	0.479657	0.787021
ENSG00000066926	FECH	protein_coding	18	ferrochelatase	2130.33	-0.096733	0.117083	-0.826185	0.408699	0.743142
ENSG00000066933	MYO9A	protein_coding	15	myosin IXA	2984.64	0.185972	0.11496	1.6177	0.105727	0.409584
ENSG00000067048	DDX3Y	protein_coding	Y	DEAD-box helicase 3 Y-linked	4869.46	0.183308	0.0722543	2.53698	0.0111812	0.102646
ENSG00000067057	PFKP	protein_coding	10	phosphofructokinase, platelet	9288.85	-0.268014	0.206815	-1.29593	0.195	0.551596
ENSG00000067064	IDI1	protein_coding	10	isopentenyl-diphosphate delta isomerase 1	7719.12	0.0587939	0.120941	0.486137	0.62687	0.859764
ENSG00000067066	SP100	protein_coding	2	SP100 nuclear antigen	6012.94	-0.00482736	0.147344	-0.0327635	0.973863	0.993914
ENSG00000067082	KLF6	protein_coding	10	Kruppel like factor 6	12497.9	0.0940902	0.119052	0.790328	0.429336	0.757788
ENSG00000067113	PLPP1	protein_coding	5	phospholipid phosphatase 1	1778.55	0.261825	0.276539	0.950077	0.342073	0.692949
ENSG00000067141	NEO1	protein_coding	15	neogenin 1	2445.7	0.273228	0.101794	2.68412	0.00727207	0.07739
ENSG00000067167	TRAM1	protein_coding	8	translocation associated membrane protein 1	6256.76	0.3928	0.157143	2.49965	0.0124317	0.111131
ENSG00000067177	PHKA1	protein_coding	X	phosphorylase kinase regulatory subunit alpha 1	295.167	-1.64005	0.150294	-10.8961	1.20359e-27	6.94875e-25
ENSG00000067182	TNFRSF1A	protein_coding	12	TNF receptor superfamily member 1A	5295.23	-0.360269	0.181576	-1.98414	0.0472399	0.264337
ENSG00000067191	CACNB1	protein_coding	17	calcium voltage-gated channel auxiliary subunit beta 1	585.294	-0.0838338	0.170287	-0.492317	0.622495	0.856647
ENSG00000067208	EVI5	protein_coding	1	ecotropic viral integration site 5	3060.54	0.330961	0.277708	1.19291	0.232905	0.59688
ENSG00000067221	STOML1	protein_coding	15	stomatin like 1	807.255	-0.00720464	0.0878262	-0.0820334	0.93462	0.981191
ENSG00000067225	PKM	protein_coding	15	pyruvate kinase M1/2	133782	-0.829205	0.0732892	-11.3141	1.11691e-29	8.59772e-27
ENSG00000067248	DHX29	protein_coding	5	DExH-box helicase 29	1818.1	0.0781361	0.0879178	0.88874	0.374143	0.719428
ENSG00000067334	DNTTIP2	protein_coding	1	deoxynucleotidyltransferase terminal interacting protein 2	2469.96	-0.0360578	0.117185	-0.307699	0.758311	0.92007
ENSG00000067365	METTL22	protein_coding	16	methyltransferase like 22	751.251	0.0740605	0.0799572	0.926258	0.354312	0.703256
ENSG00000067369	TP53BP1	protein_coding	15	tumor protein p53 binding protein 1	5134.87	-0.0356616	0.0485527	-0.734494	0.462648	0.776605
ENSG00000067445	TRO	protein_coding	X	trophinin	2182	0.190159	0.119015	1.59777	0.110094	0.418621
ENSG00000067533	RRP15	protein_coding	1	ribosomal RNA processing 15 homolog	905.813	-0.0339938	0.139317	-0.244003	0.807228	0.939617
ENSG00000067560	RHOA	protein_coding	3	ras homolog family member A	37051.4	0.018424	0.219657	0.0838745	0.933156	0.980968
ENSG00000067596	DHX8	protein_coding	17	DEAH-box helicase 8	4993.9	-0.00447184	0.0704656	-0.0634617	0.949399	0.985906
ENSG00000067601	PMS2P4	transcribed_unprocessed_pseudogene	7	PMS1 homolog 2, mismatch repair system component pseudogene 4	203.087	0.261659	0.102692	2.54783	0.0108396	0.100518
ENSG00000067606	PRKCZ	protein_coding	1	protein kinase C zeta	366.624	-0.600242	0.192103	-3.12447	0.00178127	0.0275986
ENSG00000067646	ZFY	protein_coding	Y	zinc finger protein Y-linked	942.46	0.144504	0.0763752	1.89202	0.058488	0.29869
ENSG00000067704	IARS2	protein_coding	1	isoleucyl-tRNA synthetase 2, mitochondrial	6826.41	-0.02998	0.172379	-0.173921	0.861928	0.957253
ENSG00000067715	SYT1	protein_coding	12	synaptotagmin 1	395.622	-0.312729	0.277013	-1.13428	0.256678	0.620341
ENSG00000067798	NAV3	protein_coding	12	neuron navigator 3	1332.13	0.172269	0.281036	0.613448	0.53958	0.818407
ENSG00000067829	IDH3G	protein_coding	X	isocitrate dehydrogenase (NAD(+)) 3 non-catalytic subunit gamma	4182.78	-0.083107	0.124973	-0.664999	0.506051	0.800716
ENSG00000067836	ROGDI	protein_coding	16	rogdi atypical leucine zipper	512.042	-0.276505	0.108555	-2.54711	0.010862	0.100649
ENSG00000067840	PDZD4	protein_coding	X	PDZ domain containing 4	347.049	0.355208	0.240578	1.47666	0.139767	0.4699
ENSG00000067900	ROCK1	protein_coding	18	Rho associated coiled-coil containing protein kinase 1	4895.89	0.0906992	0.103255	0.8784	0.379727	0.722069
ENSG00000067955	CBFB	protein_coding	16	core-binding factor subunit beta	3285.11	0.191702	0.114628	1.67238	0.0944501	0.388108
ENSG00000067992	PDK3	protein_coding	X	pyruvate dehydrogenase kinase 3	993.833	-0.0658091	0.178759	-0.368141	0.712768	0.899392
ENSG00000068001	HYAL2	protein_coding	3	hyaluronidase 2	1740.81	-0.583826	0.14626	-3.99162	6.56229e-05	0.00183815
ENSG00000068024	HDAC4	protein_coding	2	histone deacetylase 4	4372.42	0.0561244	0.212479	0.264138	0.791673	0.933145
ENSG00000068028	RASSF1	protein_coding	3	Ras association domain family member 1	3227.29	0.0444621	0.13477	0.329911	0.741467	0.912858
ENSG00000068078	FGFR3	protein_coding	4	fibroblast growth factor receptor 3	34.494	0.0955989	0.279064	0.342876	0.731692	0.908163
ENSG00000068079	IFI35	protein_coding	17	interferon induced protein 35	1847.55	-0.338128	0.206711	-1.63578	0.101886	0.401516
ENSG00000068097	HEATR6	protein_coding	17	HEAT repeat containing 6	1466.64	-0.0191961	0.0766737	-0.250363	0.802307	0.938071
ENSG00000068120	COASY	protein_coding	17	Coenzyme A synthase	5455.87	-0.0843275	0.136584	-0.617405	0.536968	0.816471
ENSG00000068137	PLEKHH3	protein_coding	17	pleckstrin homology, MyTH4 and FERM domain containing H3	1426.11	0.033278	0.144082	0.230966	0.817341	0.943704
ENSG00000068305	MEF2A	protein_coding	15	myocyte enhancer factor 2A	3325.41	0.0198678	0.0975268	0.203716	0.838575	0.949546
ENSG00000068308	OTUD5	protein_coding	X	OTU deubiquitinase 5	3816.85	-0.187234	0.089319	-2.09625	0.0360604	0.224867
ENSG00000068323	TFE3	protein_coding	X	transcription factor binding to IGHM enhancer 3	5492.66	-0.142927	0.236043	-0.605527	0.544829	0.821334
ENSG00000068354	TBC1D25	protein_coding	X	TBC1 domain family member 25	1281.9	-0.0761954	0.0629698	-1.21003	0.226267	0.589537
ENSG00000068366	ACSL4	protein_coding	X	acyl-CoA synthetase long chain family member 4	5177.84	-0.272619	0.0964238	-2.82729	0.00469434	0.0566592
ENSG00000068383	INPP5A	protein_coding	10	inositol polyphosphate-5-phosphatase A	1604.27	0.193639	0.096769	2.00104	0.0453876	0.258307
ENSG00000068394	GPKOW	protein_coding	X	G-patch domain and KOW motifs	1437.29	-0.179626	0.0857504	-2.09475	0.0361929	0.225287
ENSG00000068400	GRIPAP1	protein_coding	X	GRIP1 associated protein 1	3417.8	-0.180314	0.0576273	-3.12896	0.00175425	0.0272498
ENSG00000068438	FTSJ1	protein_coding	X	FtsJ RNA 2'-O-methyltransferase 1	2063.93	-0.32239	0.0806465	-3.99754	6.40054e-05	0.00180992
ENSG00000068489	PRR11	protein_coding	17	proline rich 11	3121.55	-0.218814	0.130234	-1.68015	0.0929273	0.384474
ENSG00000068615	REEP1	protein_coding	2	receptor accessory protein 1	28.0197	0.187187	0.26929	0.697474	0.485506	0.790171
ENSG00000068650	ATP11A	protein_coding	13	ATPase phospholipid transporting 11A	2152.19	-0.00479134	0.235361	-0.0203589	0.983757	0.99615
ENSG00000068654	POLR1A	protein_coding	2	RNA polymerase I subunit A	4689.99	-0.157254	0.160384	-0.980486	0.326846	0.682085
ENSG00000068697	LAPTM4A	protein_coding	2	lysosomal protein transmembrane 4 alpha	10037.1	0.407244	0.0725988	5.6095	2.0291e-08	1.32203e-06
ENSG00000068724	TTC7A	protein_coding	2	tetratricopeptide repeat domain 7A	939.24	-0.173934	0.238704	-0.728692	0.46619	0.778874
ENSG00000068745	IP6K2	protein_coding	3	inositol hexakisphosphate kinase 2	3731.53	0.0404306	0.0710379	0.569141	0.569261	0.830748
ENSG00000068781	STON1-GTF2A1L	protein_coding	2	STON1-GTF2A1L readthrough	9.48957	0.438623	0.279283	1.57584	0.115064	0.427662
ENSG00000068784	SRBD1	protein_coding	2	S1 RNA binding domain 1	999.29	0.0703216	0.0849932	0.82738	0.408021	0.742455
ENSG00000068796	KIF2A	protein_coding	5	kinesin family member 2A	2858.39	0.227395	0.072238	3.14785	0.00164478	0.0260359
ENSG00000068831	RASGRP2	protein_coding	11	RAS guanyl releasing protein 2	3.32719	0.296875	0.235689	1.29009	0.197019	0.554032
ENSG00000068878	PSME4	protein_coding	2	proteasome activator subunit 4	3314.9	-0.0541538	0.123733	-0.437667	0.661628	0.875032
ENSG00000068885	IFT80	protein_coding	3	intraflagellar transport 80	1256.19	0.149435	0.0999444	1.49519	0.134866	0.46237
ENSG00000068903	SIRT2	protein_coding	19	sirtuin 2	7578.26	0.313204	0.160099	1.95632	0.0504273	0.27449
ENSG00000068912	ERLEC1	protein_coding	2	endoplasmic reticulum lectin 1	3381.58	0.0596645	0.116616	0.51163	0.60891	0.849353
ENSG00000068971	PPP2R5B	protein_coding	11	protein phosphatase 2 regulatory subunit B'beta	3271.07	0.263493	0.178837	1.47338	0.140649	0.471541
ENSG00000068976	PYGM	protein_coding	11	glycogen phosphorylase, muscle associated	4.67074	0.194148	0.253688	0.77099	0.440713	0.764653
ENSG00000069020	MAST4	protein_coding	5	microtubule associated serine/threonine kinase family member 4	275.767	-0.0265208	0.155141	-0.170945	0.864267	0.957715
ENSG00000069188	SDK2	protein_coding	17	sidekick cell adhesion molecule 2	19.1095	0.256483	0.257094	1.00845	0.31324	0.671431
ENSG00000069248	NUP133	protein_coding	1	nucleoporin 133	2988.3	0.139764	0.0777017	1.79872	0.0720627	0.334927
ENSG00000069275	NUCKS1	protein_coding	1	nuclear casein kinase and cyclin dependent kinase substrate 1	11871.6	0.0821889	0.0794806	1.03407	0.301102	0.661609
ENSG00000069329	VPS35	protein_coding	16	VPS35 retromer complex component	6907.46	0.210485	0.122705	1.71537	0.086278	0.37042
ENSG00000069345	DNAJA2	protein_coding	16	DnaJ heat shock protein family (Hsp40) member A2	3120.72	-0.050581	0.0563948	-0.896908	0.369768	0.716041
ENSG00000069399	BCL3	protein_coding	19	BCL3 transcription coactivator	263.053	-0.697767	0.222077	-3.14217	0.00167699	0.0264249
ENSG00000069424	KCNAB2	protein_coding	1	potassium voltage-gated channel subfamily A regulatory beta subunit 2	36434.3	-0.024355	0.280768	-0.0867528	0.930868	0.980126
ENSG00000069431	ABCC9	protein_coding	12	ATP binding cassette subfamily C member 9	2.89867	0.183099	0.182741	1.06631	0.286285	0.647736
ENSG00000069482	GAL	protein_coding	11	galanin and GMAP prepropeptide	15.3514	-1.55166	0.280924	-5.45999	4.76157e-08	2.9193e-06
ENSG00000069493	CLEC2D	protein_coding	12	C-type lectin domain family 2 member D	323.593	0.167213	0.126324	1.32366	0.185617	0.539712
ENSG00000069509	FUNDC1	protein_coding	X	FUN14 domain containing 1	822.5	0.0836254	0.0951379	0.878991	0.379406	0.72193
ENSG00000069535	MAOB	protein_coding	X	monoamine oxidase B	8.40103	-0.270195	0.271119	-0.999871	0.317373	0.675053
ENSG00000069667	RORA	protein_coding	15	RAR related orphan receptor A	67.084	0.202477	0.185462	1.09158	0.275019	0.636053
ENSG00000069696	DRD4	protein_coding	11	dopamine receptor D4	10.5065	0.0397752	0.281228	0.141367	0.88758	0.965314
ENSG00000069702	TGFBR3	protein_coding	1	transforming growth factor beta receptor 3	1487.91	-0.0190172	0.111348	-0.17079	0.864389	0.957715
ENSG00000069849	ATP1B3	protein_coding	3	ATPase Na+/K+ transporting subunit beta 3	9380.61	-0.287578	0.220034	-1.30702	0.191207	0.546724
ENSG00000069869	NEDD4	protein_coding	15	NEDD4 E3 ubiquitin protein ligase	2774.57	0.33978	0.24438	1.39056	0.164359	0.507968
ENSG00000069943	PIGB	protein_coding	15	phosphatidylinositol glycan anchor biosynthesis class B	763.868	0.246961	0.125416	1.9691	0.0489416	0.269815
ENSG00000069956	MAPK6	protein_coding	15	mitogen-activated protein kinase 6	3029.15	0.0906118	0.160046	0.566161	0.571284	0.832007
ENSG00000069966	GNB5	protein_coding	15	G protein subunit beta 5	2399.24	0.081583	0.217762	0.374645	0.707925	0.897296
ENSG00000069974	RAB27A	protein_coding	15	RAB27A, member RAS oncogene family	6698.12	0.155811	0.278879	0.559228	0.576006	0.833918
ENSG00000069998	HDHD5	protein_coding	22	haloacid dehalogenase like hydrolase domain containing 5	1960.58	-0.16795	0.234376	-0.716592	0.473626	0.783965
ENSG00000070010	UFD1	protein_coding	22	ubiquitin recognition factor in ER associated degradation 1	3479.75	-0.199431	0.0686182	-2.90638	0.00365634	0.0474678
ENSG00000070018	LRP6	protein_coding	12	LDL receptor related protein 6	3323.68	-0.00302301	0.124856	-0.0242128	0.980683	0.995434
ENSG00000070031	SCT	protein_coding	11	secretin	3.93685	0.0116109	0.175457	0.0663219	0.947122	0.985139
ENSG00000070047	PHRF1	protein_coding	11	PHD and ring finger domains 1	3863.9	-0.164543	0.0884079	-1.86117	0.0627195	0.310542
ENSG00000070061	ELP1	protein_coding	9	elongator complex protein 1	3439.35	-0.0647082	0.0348087	-1.85897	0.0630318	0.311324
ENSG00000070081	NUCB2	protein_coding	11	nucleobindin 2	2786.67	0.0585796	0.271469	0.21579	0.829151	0.947407
ENSG00000070087	PFN2	protein_coding	3	profilin 2	5132.22	-0.0564831	0.167829	-0.336553	0.736454	0.910767
ENSG00000070159	PTPN3	protein_coding	9	protein tyrosine phosphatase non-receptor type 3	2156.32	-0.2131	0.132219	-1.6117	0.107026	0.412467
ENSG00000070182	SPTB	protein_coding	14	spectrin beta, erythrocytic	53.2516	-0.542039	0.271445	-2.04138	0.0412135	0.245053
ENSG00000070214	SLC44A1	protein_coding	9	solute carrier family 44 member 1	2814.53	-0.0176371	0.160424	-0.109941	0.912456	0.974672
ENSG00000070269	TMEM260	protein_coding	14	transmembrane protein 260	1190.15	0.193616	0.10096	1.91774	0.0551439	0.289905
ENSG00000070366	SMG6	protein_coding	17	SMG6 nonsense mediated mRNA decay factor	3492.39	-0.0662342	0.0674512	-0.981958	0.32612	0.681232
ENSG00000070367	EXOC5	protein_coding	14	exocyst complex component 5	3509.9	0.086371	0.0992494	0.870241	0.384169	0.725935
ENSG00000070371	CLTCL1	protein_coding	22	clathrin heavy chain like 1	698.32	0.337151	0.0813961	4.14203	3.44245e-05	0.00106629
ENSG00000070388	FGF22	protein_coding	19	fibroblast growth factor 22	15.8073	0.303285	0.277909	1.0904	0.275536	0.636447
ENSG00000070404	FSTL3	protein_coding	19	follistatin like 3	7522.41	0.167188	0.251575	0.668315	0.503932	0.800413
ENSG00000070413	DGCR2	protein_coding	22	DiGeorge syndrome critical region gene 2	4253.04	-0.0607886	0.0768645	-0.790855	0.429029	0.757718
ENSG00000070423	RNF126	protein_coding	19	ring finger protein 126	1929.95	-0.200456	0.123951	-1.6172	0.105834	0.409849
ENSG00000070444	MNT	protein_coding	17	MAX network transcriptional repressor	1739.74	-0.0697288	0.16356	-0.426317	0.669877	0.879126
ENSG00000070476	ZXDC	protein_coding	3	ZXD family zinc finger C	1369.08	-0.103095	0.0620219	-1.66224	0.0964651	0.390977
ENSG00000070495	JMJD6	protein_coding	17	jumonji domain containing 6, arginine demethylase and lysine hydroxylase	1734.55	-0.180464	0.0864942	-2.08642	0.0369405	0.228571
ENSG00000070501	POLB	protein_coding	8	DNA polymerase beta	1917.05	0.118557	0.17591	0.673962	0.500336	0.798141
ENSG00000070540	WIPI1	protein_coding	17	WD repeat domain, phosphoinositide interacting 1	11648.9	-0.0492642	0.183989	-0.267758	0.788886	0.931832
ENSG00000070610	GBA2	protein_coding	9	glucosylceramidase beta 2	4427.45	-0.0638565	0.103768	-0.615379	0.538304	0.817088
ENSG00000070614	NDST1	protein_coding	5	N-deacetylase and N-sulfotransferase 1	15373	0.0334507	0.104571	0.319883	0.749057	0.916327
ENSG00000070669	ASNS	protein_coding	7	asparagine synthetase (glutamine-hydrolyzing)	39.0925	0.379172	0.249237	1.52078	0.128316	0.45146
ENSG00000070718	AP3M2	protein_coding	8	adaptor related protein complex 3 subunit mu 2	3008.13	0.112815	0.265843	0.424381	0.671288	0.879812
ENSG00000070731	ST6GALNAC2	protein_coding	17	ST6 N-acetylgalactosaminide alpha-2,6-sialyltransferase 2	4047.76	0.100253	0.170227	0.588937	0.555904	0.826519
ENSG00000070756	PABPC1	protein_coding	8	poly(A) binding protein cytoplasmic 1	52163.7	0.214344	0.0463891	4.62058	3.82677e-06	0.000155647
ENSG00000070759	TESK2	protein_coding	1	testis associated actin remodelling kinase 2	455.446	0.0965482	0.248013	0.389273	0.697075	0.892778
ENSG00000070761	CFAP20	protein_coding	16	cilia and flagella associated protein 20	1816.22	-0.0137564	0.0942655	-0.145933	0.883974	0.964202
ENSG00000070770	CSNK2A2	protein_coding	16	casein kinase 2 alpha 2	3906.05	0.198588	0.084646	2.34609	0.0189714	0.149516
ENSG00000070778	PTPN21	protein_coding	14	protein tyrosine phosphatase non-receptor type 21	3325.17	0.310777	0.14511	2.14167	0.0322203	0.209927
ENSG00000070785	EIF2B3	protein_coding	1	eukaryotic translation initiation factor 2B subunit gamma	1046.21	-0.268769	0.126383	-2.12658	0.0334551	0.214741
ENSG00000070808	CAMK2A	protein_coding	5	calcium/calmodulin dependent protein kinase II alpha	15.5639	-0.474386	0.273039	-1.73458	0.0828154	0.362137
ENSG00000070814	TCOF1	protein_coding	5	treacle ribosome biogenesis factor 1	4383.12	-0.145341	0.136342	-1.066	0.286425	0.647736
ENSG00000070831	CDC42	protein_coding	1	cell division cycle 42	11326.1	0.161102	0.108073	1.49068	0.136046	0.464047
ENSG00000070882	OSBPL3	protein_coding	7	oxysterol binding protein like 3	1513.02	-0.516325	0.105164	-4.90961	9.12579e-07	4.29119e-05
ENSG00000070950	RAD18	protein_coding	3	RAD18 E3 ubiquitin protein ligase	1445.9	0.220926	0.191908	1.15121	0.249645	0.613143
ENSG00000070961	ATP2B1	protein_coding	12	ATPase plasma membrane Ca2+ transporting 1	2583.73	-0.216707	0.114448	-1.8935	0.0582914	0.298329
ENSG00000071051	NCK2	protein_coding	2	NCK adaptor protein 2	5817.06	-0.0626297	0.121348	-0.516117	0.605773	0.848237
ENSG00000071054	MAP4K4	protein_coding	2	mitogen-activated protein kinase kinase kinase kinase 4	21662.6	-0.0228209	0.161519	-0.141291	0.88764	0.965314
ENSG00000071073	MGAT4A	protein_coding	2	alpha-1,3-mannosyl-glycoprotein 4-beta-N-acetylglucosaminyltransferase A	82.1286	0.4989	0.27587	1.8105	0.0702176	0.329998
ENSG00000071082	RPL31	protein_coding	2	ribosomal protein L31	32356.5	0.110604	0.116909	0.946067	0.344114	0.694848
ENSG00000071127	WDR1	protein_coding	4	WD repeat domain 1	33904	-0.125062	0.0621186	-2.01328	0.0440847	0.254085
ENSG00000071189	SNX13	protein_coding	7	sorting nexin 13	2597.59	0.289899	0.157467	1.84102	0.065618	0.318274
ENSG00000071205	ARHGAP10	protein_coding	4	Rho GTPase activating protein 10	1144.32	-0.105495	0.0581067	-1.81553	0.0694428	0.328101
ENSG00000071242	RPS6KA2	protein_coding	6	ribosomal protein S6 kinase A2	9406.69	-0.0665634	0.25563	-0.260394	0.79456	0.934974
ENSG00000071243	ING3	protein_coding	7	inhibitor of growth family member 3	659.732	0.27945	0.0863588	3.23588	0.0012127	0.0203592
ENSG00000071246	VASH1	protein_coding	14	vasohibin 1	1397.86	-0.162701	0.171667	-0.94778	0.343241	0.694299
ENSG00000071282	LMCD1	protein_coding	3	LIM and cysteine rich domains 1	1346.37	-0.162477	0.17628	-0.921703	0.356684	0.705584
ENSG00000071462	BUD23	protein_coding	7	BUD23 rRNA methyltransferase and ribosome maturation factor	3039.34	-0.138482	0.0761724	-1.818	0.0690639	0.327359
ENSG00000071537	SEL1L	protein_coding	14	SEL1L adaptor subunit of ERAD E3 ubiquitin ligase	7155.08	0.0894207	0.0811588	1.1018	0.270549	0.632041
ENSG00000071539	TRIP13	protein_coding	5	thyroid hormone receptor interactor 13	1113.78	-0.112235	0.162387	-0.691153	0.489469	0.791575
ENSG00000071553	ATP6AP1	protein_coding	X	ATPase H+ transporting accessory protein 1	12678.9	-0.0836348	0.0840526	-0.995029	0.319722	0.676966
ENSG00000071564	TCF3	protein_coding	19	transcription factor 3	3877.69	-0.0499977	0.104539	-0.47827	0.632458	0.862304
ENSG00000071575	TRIB2	protein_coding	2	tribbles pseudokinase 2	8263.54	0.209852	0.273989	0.766118	0.443606	0.766537
ENSG00000071626	DAZAP1	protein_coding	19	DAZ associated protein 1	5970.01	-0.170022	0.0861509	-1.97354	0.0484342	0.26804
ENSG00000071655	MBD3	protein_coding	19	methyl-CpG binding domain protein 3	5017.7	-0.16859	0.106679	-1.58035	0.114027	0.425866
ENSG00000071794	HLTF	protein_coding	3	helicase like transcription factor	2608.71	0.211774	0.112725	1.87867	0.0602895	0.30451
ENSG00000071859	FAM50A	protein_coding	X	family with sequence similarity 50 member A	5204.39	-0.159488	0.11989	-1.3303	0.183421	0.536488
ENSG00000071889	FAM3A	protein_coding	X	FAM3 metabolism regulating signaling molecule A	1927.15	-0.156823	0.1252	-1.25258	0.210358	0.569504
ENSG00000071894	CPSF1	protein_coding	8	cleavage and polyadenylation specific factor 1	6913.54	-0.105033	0.0874557	-1.20098	0.229758	0.592822
ENSG00000071909	MYO3B	protein_coding	2	myosin IIIB	34.4522	0.195326	0.270017	0.72594	0.467876	0.780193
ENSG00000071967	CYBRD1	protein_coding	2	cytochrome b reductase 1	9929.27	0.423132	0.163664	2.58539	0.00972697	0.0942344
ENSG00000071991	CDH19	protein_coding	18	cadherin 19	5027.04	-0.317389	0.258685	-1.22722	0.21974	0.582239
ENSG00000071994	PDCD2	protein_coding	6	programmed cell death 2	2836.66	-0.000829162	0.111897	-0.00741073	0.994087	0.998851
ENSG00000072041	SLC6A15	protein_coding	12	solute carrier family 6 member 15	3019.47	-0.00938107	0.248455	-0.0377595	0.969879	0.993125
ENSG00000072042	RDH11	protein_coding	14	retinol dehydrogenase 11	6199.39	-0.107679	0.218763	-0.492218	0.622565	0.856686
ENSG00000072062	PRKACA	protein_coding	19	protein kinase cAMP-activated catalytic subunit alpha	4160.12	-0.0984371	0.0897443	-1.09686	0.272701	0.633992
ENSG00000072071	ADGRL1	protein_coding	19	adhesion G protein-coupled receptor L1	867.371	0.197726	0.0796186	2.4834	0.0130135	0.115095
ENSG00000072110	ACTN1	protein_coding	14	actinin alpha 1	25601.1	-0.40998	0.147629	-2.7771	0.00548456	0.063223
ENSG00000072121	ZFYVE26	protein_coding	14	zinc finger FYVE-type containing 26	5850.97	0.0982456	0.169997	0.577925	0.563314	0.828566
ENSG00000072134	EPN2	protein_coding	17	epsin 2	2681.05	0.289343	0.206104	1.4039	0.160349	0.501535
ENSG00000072135	PTPN18	protein_coding	2	protein tyrosine phosphatase non-receptor type 18	3388.46	-0.180231	0.156666	-1.15042	0.249972	0.613143
ENSG00000072163	LIMS2	protein_coding	2	LIM zinc finger domain containing 2	2573.17	0.2418	0.28123	0.860659	0.389426	0.728484
ENSG00000072182	ASIC4	protein_coding	2	acid sensing ion channel subunit family member 4	2.65949	-0.256823	0.22529	-1.16762	0.242959	0.606787
ENSG00000072195	SPEG	protein_coding	2	striated muscle enriched protein kinase	232.173	0.244487	0.263689	0.933725	0.350446	0.699747
ENSG00000072201	LNX1	protein_coding	4	ligand of numb-protein X 1	2.32443	0.0199531	0.171539	0.116467	0.907283	0.97256
ENSG00000072210	ALDH3A2	protein_coding	17	aldehyde dehydrogenase 3 family member A2	3316.99	0.0871705	0.149768	0.582037	0.560542	0.82784
ENSG00000072274	TFRC	protein_coding	3	transferrin receptor	1987.43	-0.00819973	0.250934	-0.0326785	0.973931	0.993914
ENSG00000072310	SREBF1	protein_coding	17	sterol regulatory element binding transcription factor 1	5508.74	-0.178358	0.153066	-1.16524	0.243923	0.607608
ENSG00000072364	AFF4	protein_coding	5	AF4/FMR2 family member 4	9109.82	-0.0203082	0.106496	-0.190695	0.848764	0.953243
ENSG00000072401	UBE2D1	protein_coding	10	ubiquitin conjugating enzyme E2 D1	673.992	0.115964	0.0672018	1.7256	0.0844197	0.366483
ENSG00000072415	MPP5	protein_coding	14	membrane palmitoylated protein 5	1786.91	0.196633	0.191077	1.02908	0.303441	0.663144
ENSG00000072422	RHOBTB1	protein_coding	10	Rho related BTB domain containing 1	1643.07	0.40926	0.0982145	4.16693	3.0873e-05	0.000973694
ENSG00000072501	SMC1A	protein_coding	X	structural maintenance of chromosomes 1A	7820.02	-0.0877119	0.149408	-0.587063	0.557161	0.826989
ENSG00000072506	HSD17B10	protein_coding	X	hydroxysteroid 17-beta dehydrogenase 10	2889.81	-0.185413	0.113793	-1.62938	0.103232	0.404092
ENSG00000072518	MARK2	protein_coding	11	microtubule affinity regulating kinase 2	2341.5	-0.0465072	0.050602	-0.919079	0.358054	0.706501
ENSG00000072571	HMMR	protein_coding	5	hyaluronan mediated motility receptor	1098.58	0.0690287	0.170603	0.40461	0.685764	0.886536
ENSG00000072609	CHFR	protein_coding	12	checkpoint with forkhead and ring finger domains	2354.39	0.0604107	0.0509148	1.1865	0.235423	0.598976
ENSG00000072682	P4HA2	protein_coding	5	prolyl 4-hydroxylase subunit alpha 2	4982.88	0.0518668	0.261013	0.198713	0.842487	0.95048
ENSG00000072694	FCGR2B	protein_coding	1	Fc fragment of IgG receptor IIb	77.9944	-0.0211441	0.278694	-0.0758904	0.939506	0.98298
ENSG00000072736	NFATC3	protein_coding	16	nuclear factor of activated T cells 3	1739.46	0.044375	0.0804781	0.551389	0.581367	0.836145
ENSG00000072756	TRNT1	protein_coding	3	tRNA nucleotidyl transferase 1	1007.49	0.0481886	0.110498	0.436102	0.662763	0.87554
ENSG00000072778	ACADVL	protein_coding	17	acyl-CoA dehydrogenase very long chain	14569	-0.412072	0.101131	-4.07464	4.6085e-05	0.00136055
ENSG00000072786	STK10	protein_coding	5	serine/threonine kinase 10	14198.3	-0.210428	0.0587193	-3.58362	0.000338859	0.00732104
ENSG00000072803	FBXW11	protein_coding	5	F-box and WD repeat domain containing 11	5309.24	0.100317	0.0628076	1.59722	0.110217	0.418862
ENSG00000072818	ACAP1	protein_coding	17	ArfGAP with coiled-coil, ankyrin repeat and PH domains 1	36.5534	0.0457604	0.270201	0.169357	0.865516	0.957824
ENSG00000072832	CRMP1	protein_coding	4	collapsin response mediator protein 1	38.0245	-0.177337	0.211137	-0.839763	0.401042	0.737894
ENSG00000072840	EVC	protein_coding	4	EvC ciliary complex subunit 1	7534.61	0.0390512	0.0922605	0.423271	0.672098	0.879974
ENSG00000072849	DERL2	protein_coding	17	derlin 2	1850.62	0.119018	0.0925092	1.28656	0.198248	0.55494
ENSG00000072858	SIDT1	protein_coding	3	SID1 transmembrane family member 1	23.1311	0.146584	0.232005	0.636859	0.524217	0.810121
ENSG00000072864	NDE1	protein_coding	16	nudE neurodevelopment protein 1	4891.91	-0.165429	0.0894828	-1.84873	0.0644972	0.315414
ENSG00000072952	IRAG1	protein_coding	11	inositol 1,4,5-triphosphate receptor associated 1	28.7975	0.602984	0.235624	2.55508	0.0106165	0.0990807
ENSG00000072954	TMEM38A	protein_coding	19	transmembrane protein 38A	169.393	0.231924	0.251063	0.923891	0.355543	0.704016
ENSG00000072958	AP1M1	protein_coding	19	adaptor related protein complex 1 subunit mu 1	5258.45	-0.0810377	0.0724331	-1.11879	0.263228	0.626322
ENSG00000073008	PVR	protein_coding	19	PVR cell adhesion molecule	2016.42	-0.523694	0.141794	-3.69329	0.000221372	0.00518713
ENSG00000073050	XRCC1	protein_coding	19	X-ray repair cross complementing 1	2567.07	-0.463083	0.0895676	-5.17014	2.33917e-07	1.2498e-05
ENSG00000073060	SCARB1	protein_coding	12	scavenger receptor class B member 1	14573.8	0.137615	0.107747	1.27721	0.201528	0.558574
ENSG00000073111	MCM2	protein_coding	3	minichromosome maintenance complex component 2	3150.02	-0.153412	0.20884	-0.734596	0.462586	0.776605
ENSG00000073150	PANX2	protein_coding	22	pannexin 2	172.021	-0.333774	0.261477	-1.27693	0.201628	0.558601
ENSG00000073169	SELENOO	protein_coding	22	selenoprotein O	1739.25	-0.126823	0.156072	-0.812587	0.416455	0.748295
ENSG00000073331	ALPK1	protein_coding	4	alpha kinase 1	1258.3	0.283796	0.0944692	3.00409	0.00266378	0.0373674
ENSG00000073350	LLGL2	protein_coding	17	LLGL scribble cell polarity complex component 2	296.066	-0.215958	0.247365	-0.873132	0.382591	0.724469
ENSG00000073417	PDE8A	protein_coding	15	phosphodiesterase 8A	3348.41	0.0929011	0.0718626	1.29276	0.196095	0.553154
ENSG00000073464	CLCN4	protein_coding	X	chloride voltage-gated channel 4	57.416	-0.337717	0.256372	-1.31765	0.187622	0.542269
ENSG00000073536	NLE1	protein_coding	17	notchless homolog 1	863.965	-0.256738	0.233787	-1.0982	0.272117	0.633227
ENSG00000073578	SDHA	protein_coding	5	succinate dehydrogenase complex flavoprotein subunit A	2776.7	-0.101035	0.148922	-0.678443	0.497491	0.795535
ENSG00000073584	SMARCE1	protein_coding	17	SWI/SNF related, matrix associated, actin dependent regulator of chromatin, subfamily e, member 1	1913.58	0.271903	0.13602	1.999	0.0456088	0.258715
ENSG00000073605	GSDMB	protein_coding	17	gasdermin B	310.265	0.278036	0.281281	0.989847	0.322249	0.679006
ENSG00000073614	KDM5A	protein_coding	12	lysine demethylase 5A	5489.47	0.147688	0.0765244	1.92994	0.0536137	0.284916
ENSG00000073670	ADAM11	protein_coding	17	ADAM metallopeptidase domain 11	88.6536	0.397727	0.223376	1.7801	0.0750589	0.342111
ENSG00000073711	PPP2R3A	protein_coding	3	protein phosphatase 2 regulatory subunit B''alpha	2573.19	0.309505	0.204262	1.51526	0.129706	0.453457
ENSG00000073712	FERMT2	protein_coding	14	fermitin family member 2	5166.29	0.210734	0.23379	0.901414	0.367368	0.713516
ENSG00000073756	PTGS2	protein_coding	1	prostaglandin-endoperoxide synthase 2	210.278	-0.699736	0.273655	-2.56363	0.0103583	0.0975472
ENSG00000073792	IGF2BP2	protein_coding	3	insulin like growth factor 2 mRNA binding protein 2	5777.95	-0.0377948	0.251128	-0.150503	0.880368	0.963303
ENSG00000073803	MAP3K13	protein_coding	3	mitogen-activated protein kinase kinase kinase 13	1163.46	0.179342	0.10433	1.71899	0.0856154	0.368768
ENSG00000073849	ST6GAL1	protein_coding	3	ST6 beta-galactoside alpha-2,6-sialyltransferase 1	6624.91	0.122623	0.0713409	1.71883	0.0856448	0.368768
ENSG00000073861	TBX21	protein_coding	17	T-box transcription factor 21	2.89727	-0.443666	0.192608	-3.16603	0.00154534	0.0247064
ENSG00000073905	VDAC1P1	processed_pseudogene	X	voltage dependent anion channel 1 pseudogene 1	41.2661	-0.658769	0.207869	-3.16321	0.00156041	0.02489
ENSG00000073910	FRY	protein_coding	13	FRY microtubule binding protein	694.283	0.276156	0.221631	1.24606	0.212743	0.573123
ENSG00000073921	PICALM	protein_coding	11	phosphatidylinositol binding clathrin assembly protein	8765.7	0.159045	0.124588	1.27656	0.201757	0.558662
ENSG00000073969	NSF	protein_coding	17	N-ethylmaleimide sensitive factor, vesicle fusing ATPase	1942.95	-0.0123656	0.0782762	-0.157974	0.874477	0.961536
ENSG00000074047	GLI2	protein_coding	2	GLI family zinc finger 2	810.416	-0.00851083	0.243275	-0.0349911	0.972087	0.993905
ENSG00000074054	CLASP1	protein_coding	2	cytoplasmic linker associated protein 1	9364.35	-0.0318772	0.183537	-0.173686	0.862112	0.957253
ENSG00000074071	MRPS34	protein_coding	16	mitochondrial ribosomal protein S34	4493.29	-0.177325	0.17436	-1.017	0.309152	0.667091
ENSG00000074181	NOTCH3	protein_coding	19	notch receptor 3	261.237	0.144903	0.277502	0.522686	0.601193	0.846042
ENSG00000074201	CLNS1A	protein_coding	11	chloride nucleotide-sensitive channel 1A	4161.69	0.13062	0.0505972	2.58157	0.00983508	0.0947062
ENSG00000074219	TEAD2	protein_coding	19	TEA domain transcription factor 2	2633.65	0.340583	0.0589981	5.77273	7.7997e-09	5.47665e-07
ENSG00000074266	EED	protein_coding	11	embryonic ectoderm development	1119.49	0.0644944	0.104381	0.617868	0.536663	0.81632
ENSG00000074317	SNCB	protein_coding	5	synuclein beta	31.7961	0.244422	0.280409	0.872246	0.383074	0.724855
ENSG00000074319	TSG101	protein_coding	11	tumor susceptibility 101	4653.06	-0.00148265	0.0477051	-0.0310797	0.975206	0.994294
ENSG00000074356	NCBP3	protein_coding	17	nuclear cap binding subunit 3	4167.33	0.201693	0.03794	5.31611	1.0601e-07	6.13738e-06
ENSG00000074370	ATP2A3	protein_coding	17	ATPase sarcoplasmic/endoplasmic reticulum Ca2+ transporting 3	44.259	-0.0141694	0.237566	-0.059619	0.952459	0.987282
ENSG00000074410	CA12	protein_coding	15	carbonic anhydrase 12	397.056	-0.713139	0.281055	-2.55774	0.0105354	0.0985014
ENSG00000074416	MGLL	protein_coding	3	monoglyceride lipase	5665.6	-0.34013	0.240901	-1.46519	0.142868	0.475174
ENSG00000074527	NTN4	protein_coding	12	netrin 4	159.132	0.0900621	0.188759	0.483434	0.628788	0.860464
ENSG00000074582	BCS1L	protein_coding	2	BCS1 homolog, ubiquinol-cytochrome c reductase complex chaperone	1686.08	-0.12481	0.123889	-1.00743	0.313727	0.671939
ENSG00000074590	NUAK1	protein_coding	12	NUAK family kinase 1	1689.66	0.0914055	0.207556	0.443728	0.65724	0.872391
ENSG00000074603	DPP8	protein_coding	15	dipeptidyl peptidase 8	3435.43	0.346064	0.0853381	4.05519	5.00928e-05	0.00146432
ENSG00000074621	SLC24A1	protein_coding	15	solute carrier family 24 member 1	1256.22	0.1074	0.108645	0.988537	0.32289	0.679487
ENSG00000074657	ZNF532	protein_coding	18	zinc finger protein 532	3225.06	0.0305284	0.189091	0.161449	0.87174	0.960517
ENSG00000074660	SCARF1	protein_coding	17	scavenger receptor class F member 1	73.2471	0.248291	0.25874	0.959912	0.3371	0.690002
ENSG00000074695	LMAN1	protein_coding	18	lectin, mannose binding 1	4270.69	-0.0360284	0.178971	-0.201311	0.840456	0.949689
ENSG00000074696	HACD3	protein_coding	15	3-hydroxyacyl-CoA dehydratase 3	7335.89	0.337872	0.076722	4.40383	1.06355e-05	0.000386447
ENSG00000074755	ZZEF1	protein_coding	17	zinc finger ZZ-type and EF-hand domain containing 1	5808.57	0.122789	0.0818447	1.50027	0.133545	0.459971
ENSG00000074800	ENO1	protein_coding	1	enolase 1	49534.4	-0.376408	0.136988	-2.74775	0.00600051	0.0674133
ENSG00000074803	SLC12A1	protein_coding	15	solute carrier family 12 member 1	12.7605	0.484473	0.281107	1.72581	0.0843811	0.366483
ENSG00000074842	MYDGF	protein_coding	19	myeloid derived growth factor	6772.54	-0.285125	0.203173	-1.40338	0.160503	0.501864
ENSG00000074855	ANO8	protein_coding	19	anoctamin 8	1036.89	-0.0533024	0.123769	-0.430661	0.666715	0.877875
ENSG00000074935	TUBE1	protein_coding	6	tubulin epsilon 1	447.946	0.00616303	0.131362	0.0469156	0.96258	0.991368
ENSG00000074964	ARHGEF10L	protein_coding	1	Rho guanine nucleotide exchange factor 10 like	3034.13	0.373113	0.160259	2.3282	0.0199014	0.153983
ENSG00000074966	TXK	protein_coding	4	TXK tyrosine kinase	10.3038	0.22209	0.281288	0.790614	0.429169	0.757718
ENSG00000075073	TACR2	protein_coding	10	tachykinin receptor 2	39.2258	0.0409423	0.268503	0.152451	0.878831	0.963179
ENSG00000075089	ACTR6	protein_coding	12	actin related protein 6	836.177	0.361936	0.15103	2.39638	0.0165578	0.136184
ENSG00000075131	TIPIN	protein_coding	15	TIMELESS interacting protein	330.304	-0.28188	0.13057	-2.15872	0.0308715	0.204864
ENSG00000075142	SRI	protein_coding	7	sorcin	4050.74	0.0219721	0.109165	0.201274	0.840484	0.949689
ENSG00000075151	EIF4G3	protein_coding	1	eukaryotic translation initiation factor 4 gamma 3	8082.54	-0.126533	0.0481579	-2.62747	0.00860234	0.0869184
ENSG00000075188	NUP37	protein_coding	12	nucleoporin 37	950.922	0.0740666	0.103814	0.713448	0.475569	0.784839
ENSG00000075213	SEMA3A	protein_coding	7	semaphorin 3A	91.6729	-0.893726	0.230717	-3.87058	0.000108576	0.00283855
ENSG00000075218	GTSE1	protein_coding	22	G2 and S-phase expressed 1	2250.41	-0.135813	0.175489	-0.773911	0.438983	0.763652
ENSG00000075223	SEMA3C	protein_coding	7	semaphorin 3C	12133.2	0.344496	0.264061	1.30509	0.191863	0.547601
ENSG00000075234	TTC38	protein_coding	22	tetratricopeptide repeat domain 38	1681.45	-0.0658126	0.0746007	-0.882197	0.37767	0.721255
ENSG00000075239	ACAT1	protein_coding	11	acetyl-CoA acetyltransferase 1	3676.52	0.154948	0.197368	0.785072	0.432411	0.759264
ENSG00000075240	GRAMD4	protein_coding	22	GRAM domain containing 4	2793.35	-0.260183	0.254508	-1.02242	0.306582	0.664709
ENSG00000075275	CELSR1	protein_coding	22	cadherin EGF LAG seven-pass G-type receptor 1	1305.49	-0.489669	0.276033	-1.77703	0.0755626	0.343292
ENSG00000075292	ZNF638	protein_coding	2	zinc finger protein 638	5467.89	0.173173	0.0881634	1.96422	0.0495045	0.271483
ENSG00000075303	SLC25A40	protein_coding	7	solute carrier family 25 member 40	1128.63	0.0492582	0.124251	0.396438	0.691782	0.889578
ENSG00000075336	TIMM21	protein_coding	18	translocase of inner mitochondrial membrane 21	966.593	-0.0357565	0.114125	-0.31331	0.754045	0.918258
ENSG00000075391	RASAL2	protein_coding	1	RAS protein activator like 2	2606.96	-0.13618	0.160556	-0.848181	0.396337	0.73385
ENSG00000075399	VPS9D1	protein_coding	16	VPS9 domain containing 1	1276.39	-0.0306036	0.182036	-0.168121	0.866488	0.958394
ENSG00000075407	ZNF37A	protein_coding	10	zinc finger protein 37A	1833.19	0.00711948	0.0848168	0.0839391	0.933105	0.980968
ENSG00000075413	MARK3	protein_coding	14	microtubule affinity regulating kinase 3	5072.18	-0.0931605	0.0709874	-1.31235	0.189401	0.544835
ENSG00000075415	SLC25A3	protein_coding	12	solute carrier family 25 member 3	32391.4	0.0519706	0.050926	1.02051	0.307486	0.665789
ENSG00000075420	FNDC3B	protein_coding	3	fibronectin type III domain containing 3B	4500.01	-0.0810085	0.219449	-0.369148	0.712017	0.899085
ENSG00000075426	FOSL2	protein_coding	2	FOS like 2, AP-1 transcription factor subunit	6479.81	0.169911	0.271354	0.627514	0.530322	0.813713
ENSG00000075461	CACNG4	protein_coding	17	calcium voltage-gated channel auxiliary subunit gamma 4	7.63499	0.174499	0.169628	1.13105	0.258034	0.621435
ENSG00000075539	FRYL	protein_coding	4	FRY like transcription coactivator	5028.4	0.254678	0.107478	2.36959	0.0178077	0.143178
ENSG00000075568	TMEM131	protein_coding	2	transmembrane protein 131	4581.31	-0.388657	0.0648608	-5.99215	2.07086e-09	1.5941e-07
ENSG00000075618	FSCN1	protein_coding	7	fascin actin-bundling protein 1	5525.61	-0.00726472	0.239553	-0.0303334	0.975801	0.994475
ENSG00000075624	ACTB	protein_coding	7	actin beta	211856	-0.13324	0.124824	-1.06743	0.28578	0.64759
ENSG00000075643	MOCOS	protein_coding	18	molybdenum cofactor sulfurase	412.246	-0.53795	0.280883	-1.92329	0.0544434	0.287854
ENSG00000075651	PLD1	protein_coding	3	phospholipase D1	1672.88	-0.0217005	0.233989	-0.092743	0.926108	0.978231
ENSG00000075673	ATP12A	protein_coding	13	ATPase H+/K+ transporting non-gastric alpha2 subunit	3.49598	0.258705	0.270409	0.95403	0.340068	0.691455
ENSG00000075702	WDR62	protein_coding	19	WD repeat domain 62	1145.88	-0.228754	0.162477	-1.4079	0.159161	0.499925
ENSG00000075711	DLG1	protein_coding	3	discs large MAGUK scaffold protein 1	4570.3	0.243879	0.187441	1.30111	0.193222	0.549349
ENSG00000075785	RAB7A	protein_coding	3	RAB7A, member RAS oncogene family	34033.1	0.0704679	0.156928	0.449045	0.653399	0.870585
ENSG00000075790	BCAP29	protein_coding	7	B cell receptor associated protein 29	186.101	-0.216571	0.12705	-1.7046	0.0882688	0.374863
ENSG00000075826	SEC31B	protein_coding	10	SEC31 homolog B, COPII coat complex component	1145.42	0.19028	0.224115	0.849054	0.395851	0.733516
ENSG00000075856	SART3	protein_coding	12	spliceosome associated factor 3, U4/U6 recycling protein	3466.75	-0.131043	0.0412465	-3.17707	0.00148771	0.0239509
ENSG00000075884	ARHGAP15	protein_coding	2	Rho GTPase activating protein 15	104.838	0.284347	0.267417	1.07167	0.28387	0.645578
ENSG00000075914	EXOSC7	protein_coding	3	exosome component 7	1324.53	-0.126423	0.157446	-0.802955	0.422001	0.752089
ENSG00000075945	KIFAP3	protein_coding	1	kinesin associated protein 3	1686.75	0.0849594	0.13387	0.634641	0.525663	0.81133
ENSG00000075975	MKRN2	protein_coding	3	makorin ring finger protein 2	2634.75	0.059547	0.0836071	0.712224	0.476326	0.78532
ENSG00000076003	MCM6	protein_coding	2	minichromosome maintenance complex component 6	2755.96	-0.13301	0.215907	-0.616054	0.537859	0.816848
ENSG00000076043	REXO2	protein_coding	11	RNA exonuclease 2	4581.11	-0.0603663	0.109976	-0.548905	0.583071	0.837148
ENSG00000076053	RBM7	protein_coding	11	RNA binding motif protein 7	841.697	0.239732	0.171693	1.39629	0.162627	0.505013
ENSG00000076067	RBMS2	protein_coding	12	RNA binding motif single stranded interacting protein 2	4276.2	0.118216	0.247485	0.477678	0.63288	0.862392
ENSG00000076108	BAZ2A	protein_coding	12	bromodomain adjacent to zinc finger domain 2A	11889.3	-0.0149054	0.0532364	-0.279985	0.779489	0.92794
ENSG00000076201	PTPN23	protein_coding	3	protein tyrosine phosphatase non-receptor type 23	4225.11	0.0104881	0.078904	0.132922	0.894255	0.967527
ENSG00000076242	MLH1	protein_coding	3	mutL homolog 1	2302.17	-0.152742	0.127066	-1.20206	0.229341	0.592275
ENSG00000076248	UNG	protein_coding	12	uracil DNA glycosylase	3042.82	0.0724225	0.253644	0.285528	0.77524	0.926543
ENSG00000076258	FMO4	protein_coding	1	flavin containing dimethylaniline monoxygenase 4	243.558	0.295692	0.122176	2.42016	0.0155139	0.129964
ENSG00000076321	KLHL20	protein_coding	1	kelch like family member 20	1469.44	-0.0488293	0.0759832	-0.642635	0.520461	0.807941
ENSG00000076344	RGS11	protein_coding	16	regulator of G protein signaling 11	287.214	0.286385	0.265509	1.08816	0.276523	0.637564
ENSG00000076351	SLC46A1	protein_coding	17	solute carrier family 46 member 1	411.238	0.0642574	0.0946447	0.678924	0.497186	0.795535
ENSG00000076356	PLXNA2	protein_coding	1	plexin A2	532.785	-0.0617862	0.167095	-0.369768	0.711555	0.898971
ENSG00000076382	SPAG5	protein_coding	17	sperm associated antigen 5	3272.64	-0.231646	0.183416	-1.26295	0.206606	0.56487
ENSG00000076513	ANKRD13A	protein_coding	12	ankyrin repeat domain 13A	3283.98	0.270436	0.0760517	3.55595	0.000376622	0.0080038
ENSG00000076554	TPD52	protein_coding	8	tumor protein D52	150.409	-0.64032	0.130166	-4.91693	8.79135e-07	4.15271e-05
ENSG00000076555	ACACB	protein_coding	12	acetyl-CoA carboxylase beta	1713	0.263536	0.211542	1.2458	0.212838	0.573231
ENSG00000076604	TRAF4	protein_coding	17	TNF receptor associated factor 4	2948.29	-0.153441	0.172676	-0.888602	0.374217	0.719428
ENSG00000076641	PAG1	protein_coding	8	phosphoprotein membrane anchor with glycosphingolipid microdomains 1	8710.36	0.359562	0.204962	1.75433	0.0793736	0.353067
ENSG00000076650	GPATCH1	protein_coding	19	G-patch domain containing 1	620.253	0.0595862	0.10477	0.568725	0.569543	0.830868
ENSG00000076662	ICAM3	protein_coding	19	intercellular adhesion molecule 3	456.759	-0.239931	0.185719	-1.29186	0.196406	0.553673
ENSG00000076685	NT5C2	protein_coding	10	5'-nucleotidase, cytosolic II	3143.34	0.0524241	0.0417372	1.25605	0.209097	0.568088
ENSG00000076706	MCAM	protein_coding	11	melanoma cell adhesion molecule	35812.1	0.0810845	0.277024	0.292786	0.769686	0.924617
ENSG00000076716	GPC4	protein_coding	X	glypican 4	325.284	0.262247	0.281124	0.934474	0.350059	0.699747
ENSG00000076770	MBNL3	protein_coding	X	muscleblind like splicing regulator 3	376.502	-0.0948357	0.258265	-0.367192	0.713476	0.89981
ENSG00000076826	CAMSAP3	protein_coding	19	calmodulin regulated spectrin associated protein family member 3	2.40978	0.109786	0.233076	0.472609	0.636492	0.863871
ENSG00000076864	RAP1GAP	protein_coding	1	RAP1 GTPase activating protein	468.117	0.292563	0.265806	1.10093	0.270928	0.632233
ENSG00000076924	XAB2	protein_coding	19	XPA binding protein 2	2682.93	-0.0328832	0.0738285	-0.445401	0.65603	0.871849
ENSG00000076928	ARHGEF1	protein_coding	19	Rho guanine nucleotide exchange factor 1	7767.87	-0.111737	0.119642	-0.933932	0.350339	0.699747
ENSG00000076944	STXBP2	protein_coding	19	syntaxin binding protein 2	1618.2	-0.208366	0.0857802	-2.42905	0.0151383	0.127876
ENSG00000076984	MAP2K7	protein_coding	19	mitogen-activated protein kinase kinase 7	2459.39	-0.0125936	0.0955161	-0.131849	0.895104	0.967841
ENSG00000077044	DGKD	protein_coding	2	diacylglycerol kinase delta	1357.56	-0.105744	0.155126	-0.681661	0.495453	0.795286
ENSG00000077063	CTTNBP2	protein_coding	7	cortactin binding protein 2	267.413	0.124852	0.277745	0.449798	0.652856	0.870081
ENSG00000077092	RARB	protein_coding	3	retinoic acid receptor beta	445.758	0.652572	0.144789	4.50654	6.58923e-06	0.000252211
ENSG00000077097	TOP2B	protein_coding	3	DNA topoisomerase II beta	7817.05	0.223257	0.128769	1.73378	0.0829578	0.36253
ENSG00000077147	TM9SF3	protein_coding	10	transmembrane 9 superfamily member 3	7459.4	0.182596	0.101544	1.79819	0.0721462	0.335006
ENSG00000077150	NFKB2	protein_coding	10	nuclear factor kappa B subunit 2	2150.21	-0.205228	0.0872977	-2.3509	0.0187281	0.14834
ENSG00000077152	UBE2T	protein_coding	1	ubiquitin conjugating enzyme E2 T	1370.3	-0.0997454	0.153548	-0.649596	0.515953	0.805196
ENSG00000077157	PPP1R12B	protein_coding	1	protein phosphatase 1 regulatory subunit 12B	1503.81	0.162555	0.0961948	1.68985	0.0910563	0.380405
ENSG00000077232	DNAJC10	protein_coding	2	DnaJ heat shock protein family (Hsp40) member C10	4568.54	-0.0244692	0.0797378	-0.306871	0.758941	0.920421
ENSG00000077235	GTF3C1	protein_coding	16	general transcription factor IIIC subunit 1	8255.4	-0.083815	0.0860756	-0.973737	0.330187	0.684666
ENSG00000077238	IL4R	protein_coding	16	interleukin 4 receptor	1117.84	-0.411522	0.137075	-3.00211	0.00268119	0.0375765
ENSG00000077254	USP33	protein_coding	1	ubiquitin specific peptidase 33	4006.87	0.218781	0.0789467	2.77125	0.00558416	0.0640389
ENSG00000077264	PAK3	protein_coding	X	p21 (RAC1) activated kinase 3	31.6509	-0.740792	0.273099	-2.71518	0.00662395	0.0723448
ENSG00000077274	CAPN6	protein_coding	X	calpain 6	2.16035	0.0214849	0.103887	0.209946	0.83371	0.948898
ENSG00000077279	DCX	protein_coding	X	doublecortin	4.93354	0.0287882	0.243169	0.118762	0.905464	0.971876
ENSG00000077312	SNRPA	protein_coding	19	small nuclear ribonucleoprotein polypeptide A	2494.6	-0.26511	0.113792	-2.32977	0.0198186	0.153583
ENSG00000077348	EXOSC5	protein_coding	19	exosome component 5	679.534	-0.221171	0.254038	-0.87067	0.383934	0.725777
ENSG00000077380	DYNC1I2	protein_coding	2	dynein cytoplasmic 1 intermediate chain 2	8810.13	0.138196	0.113589	1.21663	0.223744	0.586893
ENSG00000077454	LRCH4	protein_coding	7	leucine rich repeats and calponin homology domain containing 4	1601.52	-0.142125	0.0933606	-1.52232	0.127928	0.451104
ENSG00000077458	FAM76B	protein_coding	11	family with sequence similarity 76 member B	910.714	0.29397	0.11527	2.55027	0.0107639	0.100008
ENSG00000077463	SIRT6	protein_coding	19	sirtuin 6	970.868	-0.220175	0.0920484	-2.39193	0.0167601	0.137359
ENSG00000077498	TYR	protein_coding	11	tyrosinase	78958.3	-0.0951975	0.281114	-0.338698	0.734837	0.909632
ENSG00000077514	POLD3	protein_coding	11	DNA polymerase delta 3, accessory subunit	1137.08	0.00291872	0.100873	0.0289341	0.976917	0.994621
ENSG00000077522	ACTN2	protein_coding	1	actinin alpha 2	65.909	-0.694242	0.26006	-2.66958	0.00759467	0.0797646
ENSG00000077549	CAPZB	protein_coding	1	capping actin protein of muscle Z-line subunit beta	14065.1	-0.115381	0.0611364	-1.88727	0.0591245	0.300451
ENSG00000077585	GPR137B	protein_coding	1	G protein-coupled receptor 137B	7747.04	0.36907	0.172515	2.13936	0.0324066	0.210678
ENSG00000077616	NAALAD2	protein_coding	11	N-acetylated alpha-linked acidic dipeptidase 2	27.3097	0.251478	0.268681	0.935445	0.349559	0.699455
ENSG00000077684	JADE1	protein_coding	4	jade family PHD finger 1	1691.74	0.199416	0.200744	0.993392	0.320519	0.677376
ENSG00000077713	SLC25A43	protein_coding	X	solute carrier family 25 member 43	1726.13	0.103477	0.0544298	1.90111	0.0572876	0.295686
ENSG00000077721	UBE2A	protein_coding	X	ubiquitin conjugating enzyme E2 A	3236.09	0.0416798	0.0650934	0.640307	0.521973	0.808939
ENSG00000077782	FGFR1	protein_coding	8	fibroblast growth factor receptor 1	9632.87	-1.05172	0.263572	-4.00374	6.23495e-05	0.00177517
ENSG00000077935	SMC1B	protein_coding	22	structural maintenance of chromosomes 1B	2.74058	0.174217	0.214269	0.823457	0.410248	0.74431
ENSG00000077942	FBLN1	protein_coding	22	fibulin 1	1487.63	0.198313	0.118086	1.6794	0.0930734	0.384809
ENSG00000078018	MAP2	protein_coding	2	microtubule associated protein 2	3158.9	0.316011	0.271711	1.16364	0.24457	0.60825
ENSG00000078043	PIAS2	protein_coding	18	protein inhibitor of activated STAT 2	1521.4	0.287847	0.172268	1.67093	0.0947362	0.388746
ENSG00000078053	AMPH	protein_coding	7	amphiphysin	251.629	0.460594	0.183861	2.505	0.0122451	0.110126
ENSG00000078061	ARAF	protein_coding	X	A-Raf proto-oncogene, serine/threonine kinase	3432.37	-0.0376157	0.0777077	-0.484068	0.628338	0.860301
ENSG00000078070	MCCC1	protein_coding	3	methylcrotonoyl-CoA carboxylase 1	1867.27	-0.0302622	0.156674	-0.193155	0.846837	0.952026
ENSG00000078081	LAMP3	protein_coding	3	lysosomal associated membrane protein 3	7.42942	-0.369887	0.281368	-1.31393	0.188868	0.544105
ENSG00000078098	FAP	protein_coding	2	fibroblast activation protein alpha	2481.82	-0.102029	0.281303	-0.362786	0.716765	0.90177
ENSG00000078124	ACER3	protein_coding	11	alkaline ceramidase 3	1041.67	0.200353	0.11786	1.6999	0.0891504	0.376816
ENSG00000078140	UBE2K	protein_coding	4	ubiquitin conjugating enzyme E2 K	3304.39	0.0649697	0.0887124	0.732362	0.463948	0.777386
ENSG00000078142	PIK3C3	protein_coding	18	phosphatidylinositol 3-kinase catalytic subunit type 3	3169.58	0.103783	0.0615302	1.6867	0.0916613	0.381513
ENSG00000078177	N4BP2	protein_coding	4	NEDD4 binding protein 2	414.476	0.140858	0.117986	1.19385	0.232535	0.59652
ENSG00000078237	TIGAR	protein_coding	12	TP53 induced glycolysis regulatory phosphatase	511.449	0.0207341	0.0928802	0.223234	0.823354	0.945708
ENSG00000078246	TULP3	protein_coding	12	TUB like protein 3	3789.83	0.223021	0.183145	1.21774	0.223324	0.586291
ENSG00000078269	SYNJ2	protein_coding	6	synaptojanin 2	2114.39	-1.19909	0.116643	-10.2791	8.75748e-25	3.5003e-22
ENSG00000078295	ADCY2	protein_coding	5	adenylate cyclase 2	220.123	0.307972	0.177693	1.73299	0.0830973	0.362987
ENSG00000078304	PPP2R5C	protein_coding	14	protein phosphatase 2 regulatory subunit B'gamma	5464.86	0.167526	0.0643648	2.60275	0.00924793	0.0912353
ENSG00000078319	PMS2P1	transcribed_unprocessed_pseudogene	7	PMS1 homolog 2, mismatch repair system component pseudogene 1	912.061	-0.192873	0.0599348	-3.21802	0.00129081	0.0213561
ENSG00000078369	GNB1	protein_coding	1	G protein subunit beta 1	32037.1	0.0419651	0.0489	0.858182	0.390792	0.729117
[truncated: 19,565 more rows]

## Sheet: mRNA +TPAAll vs TPAfreeAll
id	gene_name	biotype	chromosome	description	baseMean	log2FoldChange	lfcSE	stat	pvalue	padj
[truncated: 20,801 more rows]

[truncated: 4 more sheets: mRNA +TPA vs TPAfree, mRNA TPAfree vs TPAfreeDox, mRNA +TPA vs +TPADox, mRNA+TPADox vs TPAfreeDox]
